# Supplementary material for: Reference-informed prediction of alternative splicing and splicing-altering mutations from sequences
Source: HighWire-hosted journal article supplement (doi:10.1101/gr.279044.124), 2024-07-01
Supplement: Supplemental_Figs.pdf [file Supplemental_Figs.pdf]

## SUPPLEMENTAL FIGURES

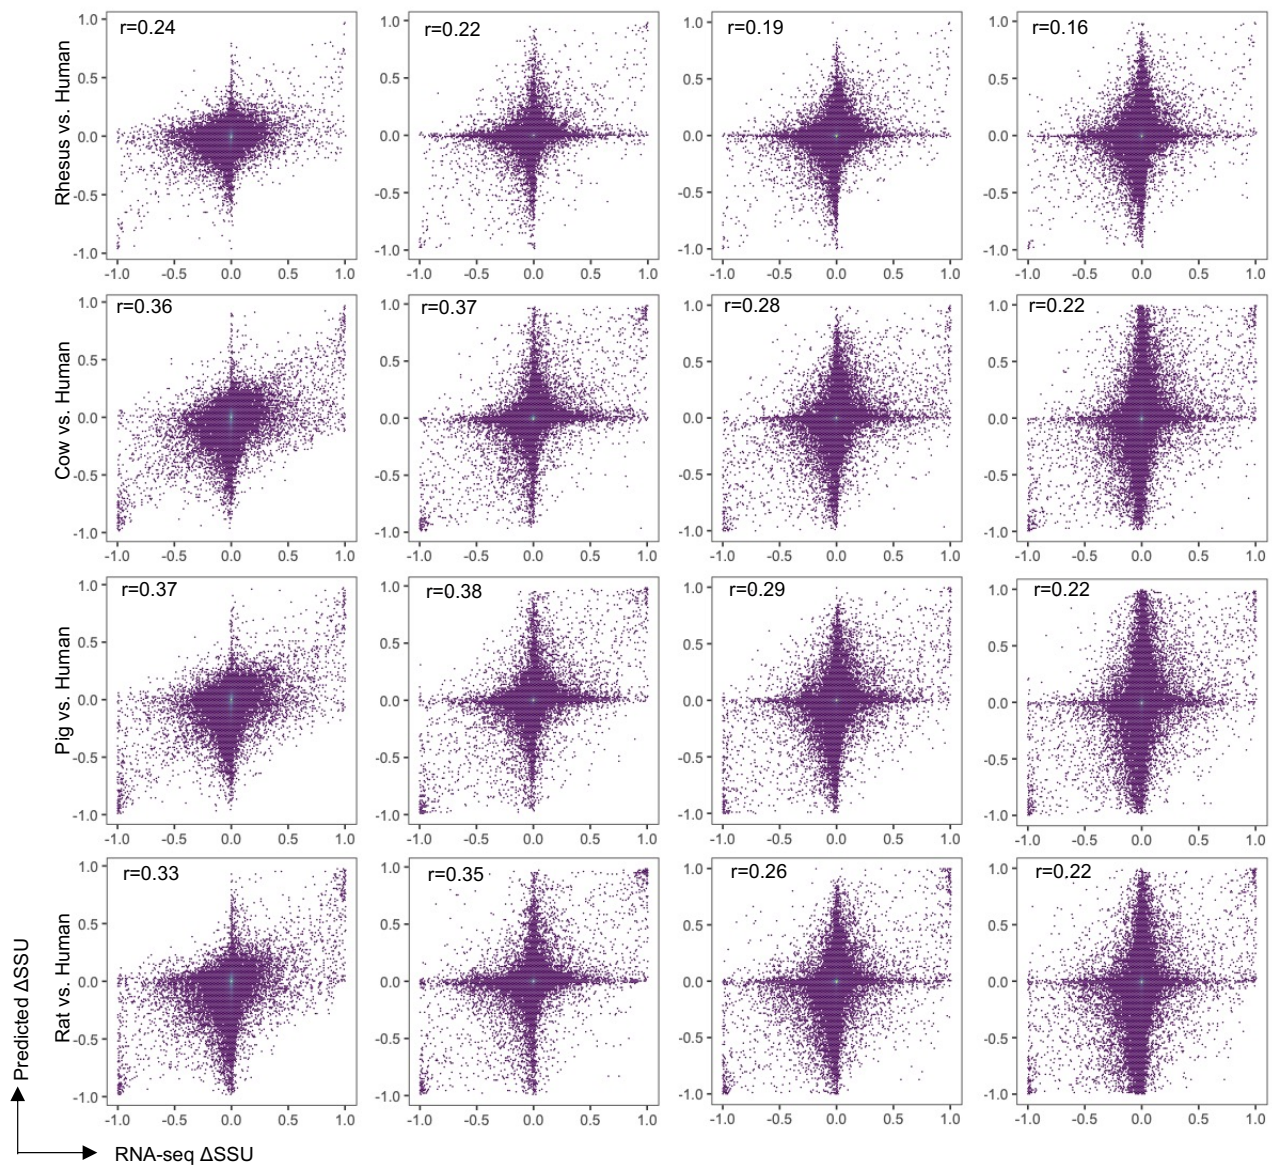

**Figure S1: Distribution of predicted and experimental  $\Delta$ SSU for splice sites between the other species.**

Related to Fig. 4A in the main text. Distribution of  $\Delta$ SSU predicted by different methods and experimental  $\Delta$ SSU is shown for splice sites in additional species homologous to humans.

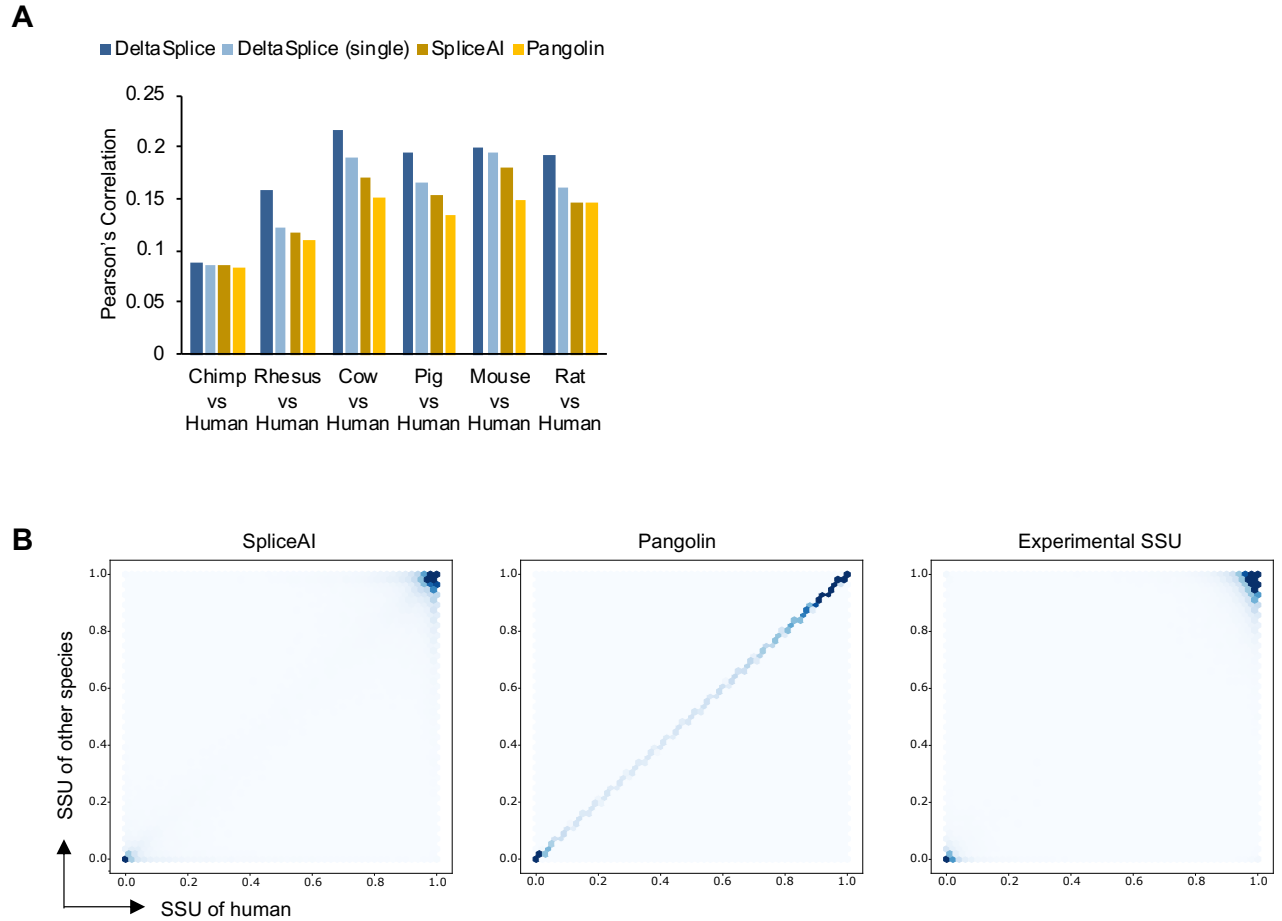

**Figure S2: Additional assessment of DeltaSplice and other methods in predicting  $\Delta$ SSU of orthologous splice sites in human and other species.** Related to **Fig. 2** and **Fig. 4** in the main text. **A.** Pearson correlations of predicted and RNA-seq measured  $\Delta$ SSU. Similar to Fig. 4B in the main text but the correlations were calculated using orthologous splice sites with  $\Delta$ SSU  $\leq 0.5$  between human and the other compared species. **B.** Joint distribution of SSU for orthologous splice sites in human and other species. SSU values were predicted by SpliceAI (left), Pangolin (middle), or measured by RNA-seq (right).

**FAS exon 6**

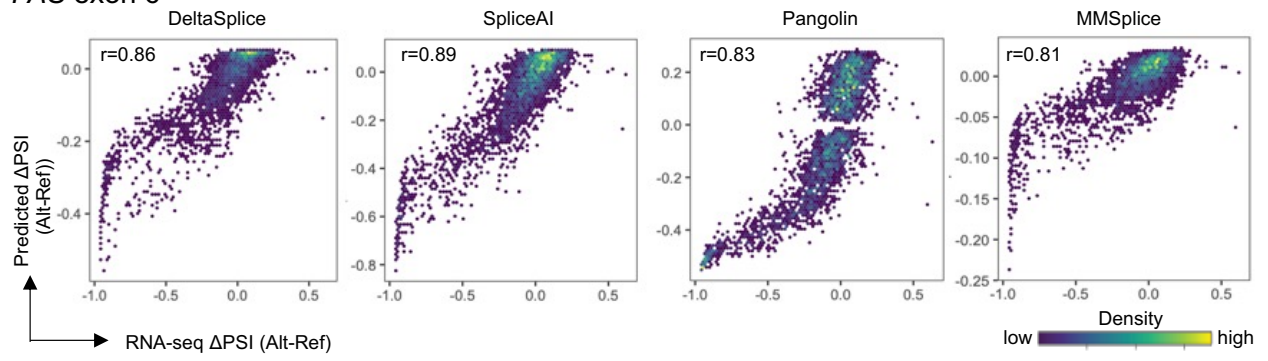

**Figure S3: The performance of DeltaSplice and baseline methods in predicting splicing-altering mutations as measured by reporter assays. Similar to Fig. 5A in the main text, but for the *FAS* exon 6 dataset.**

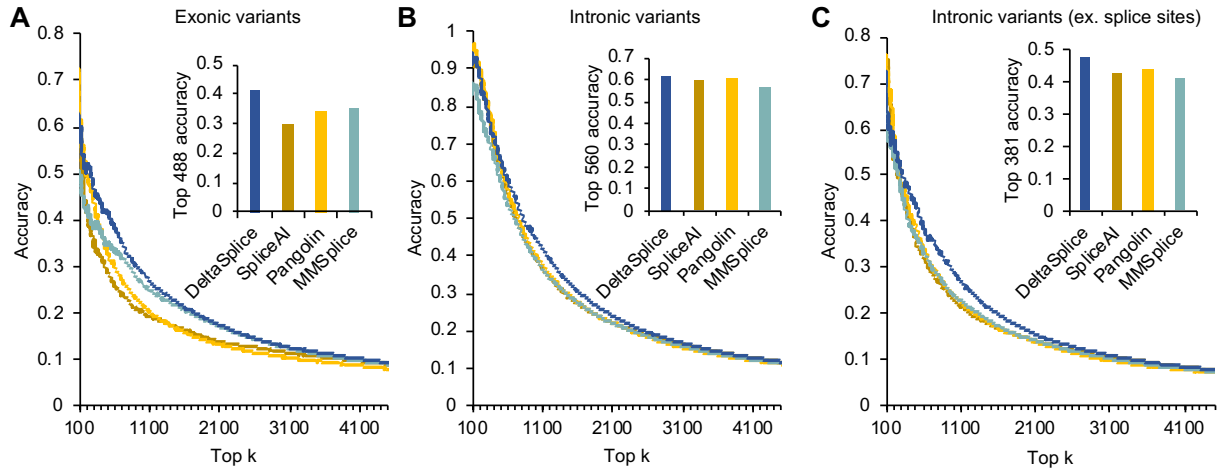

**Figure S4: Performance of DeltaSplice and the other compared methods in predicting splicing-altering variants in MFASS dataset.** Related to Fig. 5B,C in the main text. **A.** Exonic variants. **B.** Intronic variants including splice site mutations. **C.** Intronic variants excluding splice site mutations. See Fig. 5B,C legends for more details.

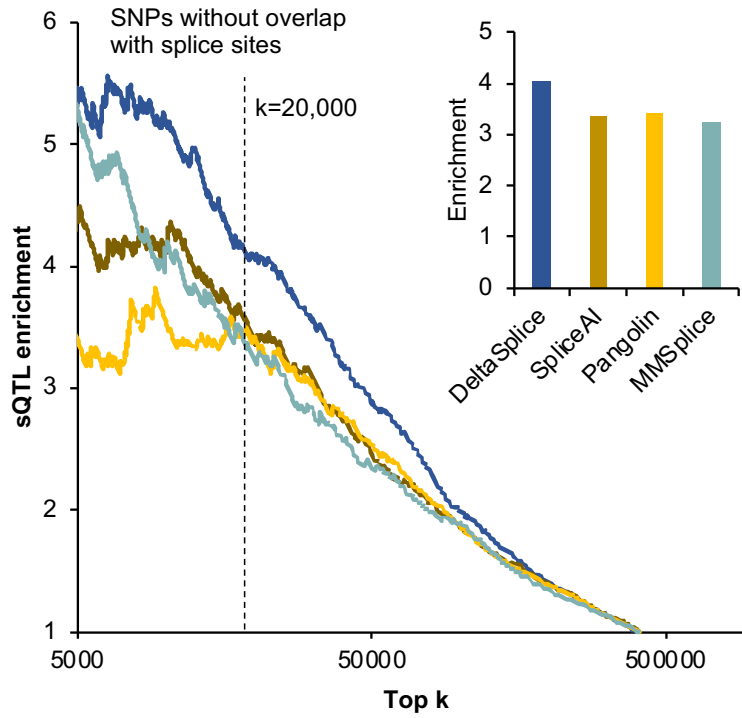

**Figure S5: The performance of DeltaSplice and baseline methods in predicting splicing-altering mutations at sQTLs.** Similar to Fig. 6 in the main text, but variants overlapping with splice sites were excluded for analysis.

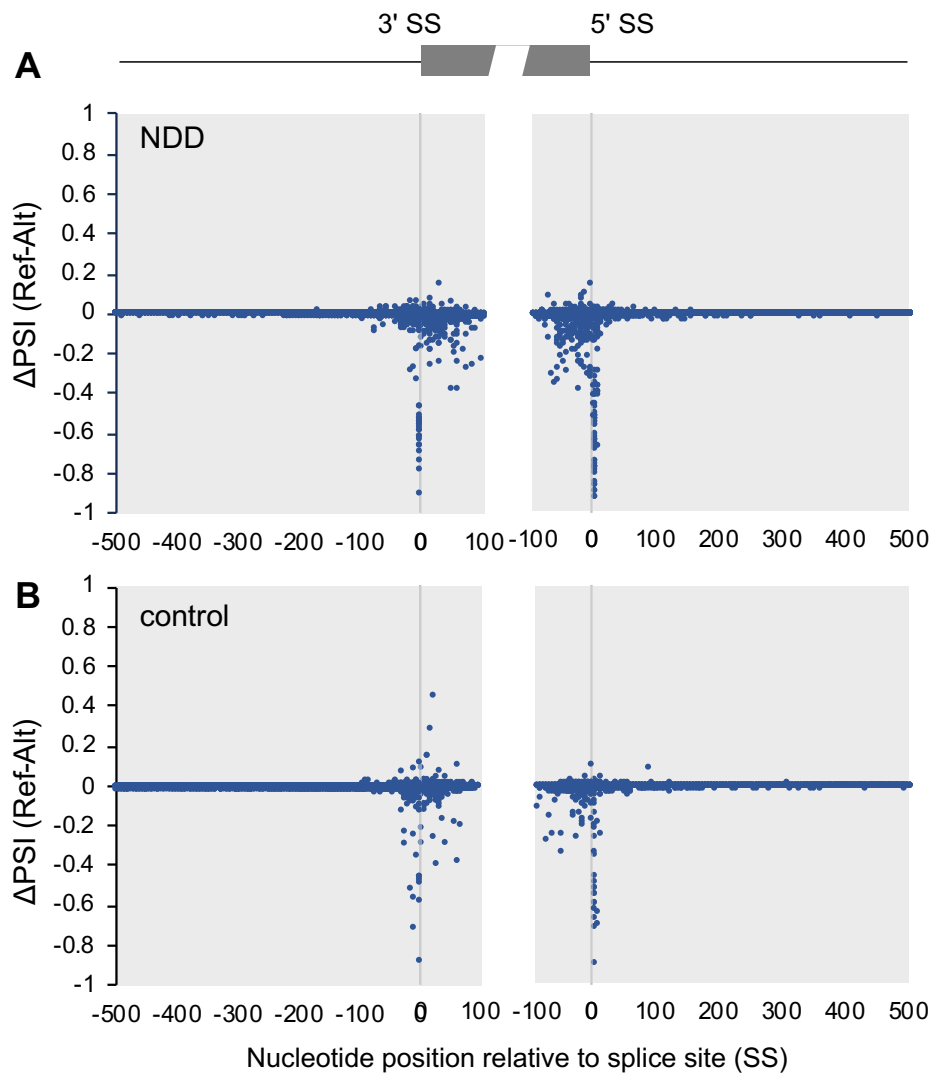

**Figure S6: Predicted splicing changes caused by *de novo* mutations depending on their distance from the splice sites.** Related to Fig. 7A in the main text. **A.** Autism cases. **B.** Controls. *De novo* mutations were derived from whole-genome sequencing.

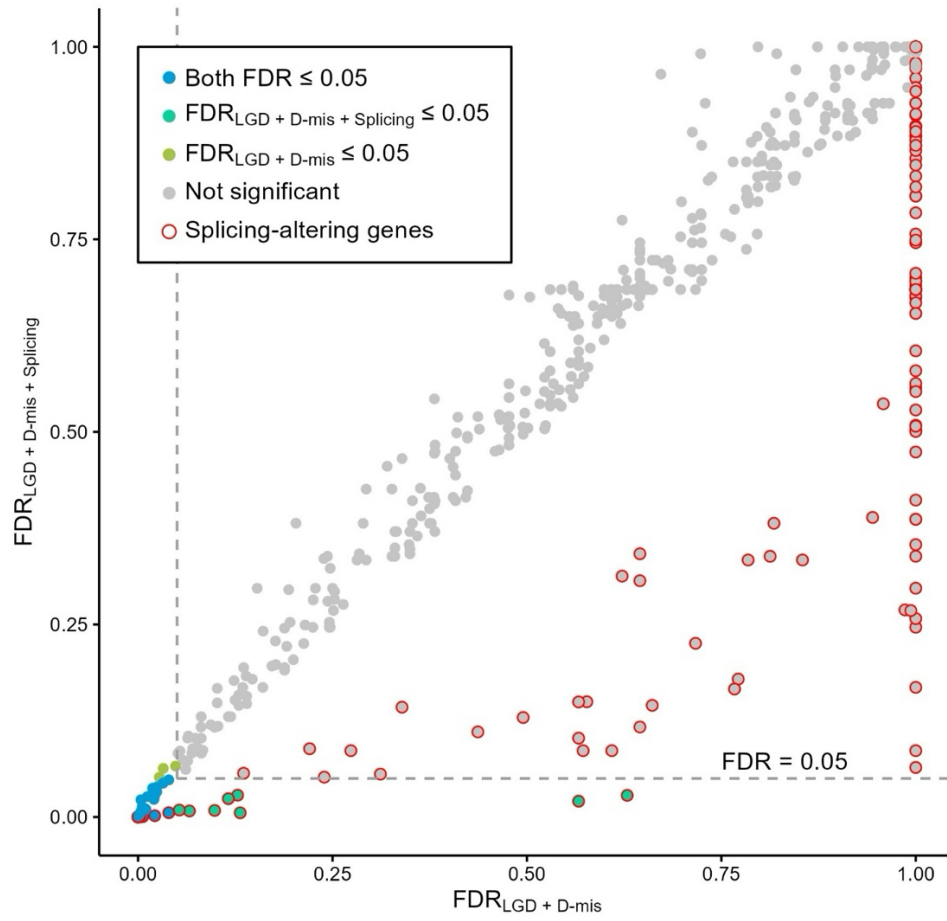

**Figure S7:** Distribution of FDR values of all genes. FDRs were generated using two models (model 1: LGD + D-mis, model 2: LGD + D-mis + splicing, see Methods). The gray dashed line indicates the significant threshold. Genes carrying predicted splicing-altering mutations were labeled with red circles.
