# Supplementary material for: Reference-informed prediction of alternative splicing and splicing-altering mutations from sequences
Source: HighWire-hosted journal article supplement (doi:10.1101/gr.279044.124), 2024-07-01
Supplement: Supplemental_Table_S1.xlsx [file Supplemental_Table_S1.xlsx]

## Sheet: Table S1
Table S1: RNA-seq datasets used for splice site usage estimation.
Species	Assembly	Gene annotation	Study	PMID	accession	Samples
Human	hg19	refGene, UCSC Known Gene	Lister 2013	23828890	SRP026048	hs_mfg_25yr
						hs_fc_53yr
Chimpanzee	panTro5	ensGene	Brawand 2011	22012392	SRP007412	ptr_br_M_1
						ptr_br_M_2
						ptr_br_M_3
						ptr_br_M_4
						ptr_br_M_5
Rhesus	rheMac10	ensGene	Cardoso-Moreira 2019	31243369	E-MTAB-6811	5501sTS.Macaque.Brain.9ypb.Male
						5988sTS.Macaque.Brain.9ypb.Male
						6110sTS.Macaque.Brain.14ypb.Male
						6111sTS.Macaque.Brain.15ypb.Male
						5413sTS.Macaque.Brain.21ypb.Male
						5461sTS.Macaque.Brain.22ypb.Male
Marmoset	calJac4	ensGene	Carelli 2018	30287902	SRP145002	marmoset_brain_adult_female1
						marmoset_brain_adult_male1
						marmoset_brain_adult_male2
			Cortez 2014	24759410	SRP029760	marmoset RNAseq data 1
						marmoset RNAseq data 2
Cow	bosTau9	ensGene	Eusebi 2022	35032285	SRP259378	pfc_3yr1-8
						pfc_4yr1-8
Pig	susScr11	ensGene	Kern 2021	33758196	SRP2850	pig_cortex1
						pig_cortex2
		ensGene	LI 2018	30104384	SRP124265	pig_brain
Mouse	mm10	refGene, UCSC Known Gene	Yan 2015	25737549	SRP055008	p30a
						p30b
						p110a
						p110b
						21Ma
						21Mb
			Lister 2013	23828890	SRP026048	mm_fc_4wk
						mm_fc_6wk
						mm_fc_10wk
						mm_fc_22mo
Rat	rn6	ensGene	Cardoso-Moreira 2019	31243369	E-MTAB-6811	1875sTS.Rat.Brain.6wpb.Male
						1971sTS.Rat.Brain.6wpb.Male
						1975sTS.Rat.Brain.6wpb.Female
						2363sTS.Rat.Brain.6wpb.Female
						2348sTS.Rat.Brain.16wpb.Female
						2352sTS.Rat.Brain.16wpb.Female
						2356sTS.Rat.Brain.16wpb.Male
						2367sTS.Rat.Brain.16wpb.Male
