# Supplementary material for: Reference-informed prediction of alternative splicing and splicing-altering mutations from sequences
Source: HighWire-hosted journal article supplement (doi:10.1101/gr.279044.124), 2024-07-01
Supplement: Supplemental_Table_S2.xlsx [file Supplemental_Table_S2.xlsx]

## Sheet: Table S2
Table S2: Summary of the gene and splice site numbers.
		training set			validation set			test set
	gene	3' splice site	5' splice site	gene	3' splice site	5' splice site	gene	3' splice site	5' splice site
Human	11861	153482	153895	1365	18851	18675	5224	73066	72204
Chimpanzee	12389	83246	83828	1500	10325	10318	5627	38839	38758
Rhesus	10995	142194	142321	1295	17878	17916	4890	66884	66791
Marmoset	10517	92872	92845	1321	12218	12239	4894	45339	45355
Cow	10248	108601	108659	1293	13590	13746	4745	52534	52345
Pig	9863	108910	109003	1232	14035	13882	4578	53082	52961
Mouse	10303	152831	152704	1272	18955	18918	4850	75044	74383
Rat	10093	122204	122426	1227	15122	15160	4673	58429	58629
