# Supplementary material for: Reference-informed prediction of alternative splicing and splicing-altering mutations from sequences
Source: HighWire-hosted journal article supplement (doi:10.1101/gr.279044.124), 2024-07-01
Supplement: Supplemental_Table_S3.xlsx [file Supplemental_Table_S3.xlsx]

## Sheet: Table S3
Table S3: Ablation studies on the number of model parameters, the size of the model's receptive field, and the weights of the loss function.
	The number of model parameters	Receptive field	weight of l_(D,R) and l_(D,E)	Pearson's correlation in predicting SSU								Pearson's correlation in predicting dSSU of the Vex-seq dataset.
				Human	Chimp	Rhesus	Marmoset	Cow	Pig	Mouse	Rat
DeltaSplice	8075145	27264	1e-05	0.954	0.9418	0.9614	0.9519	0.9421	0.9456	0.9595	0.9541	0.712078
DeltaSplice (small)	2196681	27264	1e-05	0.9511	0.9388	0.9586	0.95	0.9382	0.942	0.9563	0.9507	0.695466
DeltaSplice (20k)	8075145	19088	1e-05	0.9539	0.9414	0.9613	0.9521	0.9424	0.9454	0.9596	0.9539	0.708383
DeltaSplice (10k)	8075145	9864	1e-05	0.9515	0.9392	0.9594	0.9509	0.9402	0.9433	0.9578	0.9526	0.703911
DeltaSplice (large weight loss)	8075145	27264	0.001	0.9553	0.9425	0.9623	0.9533	0.9433	0.9473	0.9607	0.9551	0.677886
