# Supplementary material for: Reference-informed prediction of alternative splicing and splicing-altering mutations from sequences
Source: HighWire-hosted journal article supplement (doi:10.1101/gr.279044.124), 2024-07-01
Supplement: Supplemental_Table_S4.xlsx [file Supplemental_Table_S4.xlsx]

## Sheet: Table S4
Table S4: sQTLs SNVs with |dPSI|>0.05 predicted by DeltaSplice. Each sQTL is identified by the tissue name, the variant id, and 'phenotype_id' column based on the files downloaded from GTEx. Only sQTLs within 200bp from a cassette exon is included in the analysis and the cassette exon ID associated with each sQTL is included as part of the 'sQTL2exonID' column. The cassette exon coordinate is pro…
varant ID	sQTL ID	sQTL2exonID	cassette exon ID	chrom	varPOS	exonStart	exonEnd	gene id	gene symbol	region	distance to exon junction or end	splice_site	ref PSI	dPSI	abs(dPSI)
chr1_31689049_C_A	Brain_Nucleus_accumbens_basal_ganglia||chr1_31689049_C_A||chr1:31688971:31689741:clu_41953:ENSG00000084636.17	Brain_Nucleus_accumbens_basal_ganglia||chr1_31689049_C_A||chr1:31688971:31689741:clu_41953:ENSG00000084636.17||CA-1307-17427-18082-18118-18196[INC][23/1]	CA-1307-17427-18082-18118-18196[INC][23/1]	chr1	31689049	31689050	31689085	1307	COL16A1	intron	1	1	0.94997	-0.813357	0.813357
chr1_31689049_C_A	Brain_Spinal_cord_cervical_c-1||chr1_31689049_C_A||chr1:31688971:31689741:clu_35590:ENSG00000084636.17	Brain_Spinal_cord_cervical_c-1||chr1_31689049_C_A||chr1:31688971:31689741:clu_35590:ENSG00000084636.17||CA-1307-17427-18082-18118-18196[INC][23/1]	CA-1307-17427-18082-18118-18196[INC][23/1]	chr1	31689049	31689050	31689085	1307	COL16A1	intron	1	1	0.94997	-0.813357	0.813357
chr1_31689049_C_A	Brain_Substantia_nigra||chr1_31689049_C_A||chr1:31688971:31689741:clu_32047:ENSG00000084636.17	Brain_Substantia_nigra||chr1_31689049_C_A||chr1:31688971:31689741:clu_32047:ENSG00000084636.17||CA-1307-17427-18082-18118-18196[INC][23/1]	CA-1307-17427-18082-18118-18196[INC][23/1]	chr1	31689049	31689050	31689085	1307	COL16A1	intron	1	1	0.94997	-0.813357	0.813357
chr9_17630429_A_G	Brain_Anterior_cingulate_cortex_BA24||chr9_17630429_A_G||chr9:17579287:17747066:clu_39509:ENSG00000107295.9	Brain_Anterior_cingulate_cortex_BA24||chr9_17630429_A_G||chr9:17579287:17747066:clu_39509:ENSG00000107295.9||CA-6456-3334-54400-54471-171112[INC][1/271][UPT]	CA-6456-3334-54400-54471-171112[INC][1/271][UPT]	chr9	17630429	17630354	17630424	6456	SH3GL2	intron	5	0	0.0128734	0.574506	0.574506
chr9_17630429_A_G	Brain_Cortex||chr9_17630429_A_G||chr9:17579287:17747066:clu_46032:ENSG00000107295.9	Brain_Cortex||chr9_17630429_A_G||chr9:17579287:17747066:clu_46032:ENSG00000107295.9||CA-6456-3334-54400-54471-171112[INC][1/271][UPT]	CA-6456-3334-54400-54471-171112[INC][1/271][UPT]	chr9	17630429	17630354	17630424	6456	SH3GL2	intron	5	0	0.0128734	0.574506	0.574506
chr9_17630429_A_G	Brain_Frontal_Cortex_BA9||chr9_17630429_A_G||chr9:17579287:17747066:clu_42808:ENSG00000107295.9	Brain_Frontal_Cortex_BA9||chr9_17630429_A_G||chr9:17579287:17747066:clu_42808:ENSG00000107295.9||CA-6456-3334-54400-54471-171112[INC][1/271][UPT]	CA-6456-3334-54400-54471-171112[INC][1/271][UPT]	chr9	17630429	17630354	17630424	6456	SH3GL2	intron	5	0	0.0128734	0.574506	0.574506
chr9_17630429_A_G	Brain_Hypothalamus||chr9_17630429_A_G||chr9:17579287:17747066:clu_43703:ENSG00000107295.9	Brain_Hypothalamus||chr9_17630429_A_G||chr9:17579287:17747066:clu_43703:ENSG00000107295.9||CA-6456-3334-54400-54471-171112[INC][1/271][UPT]	CA-6456-3334-54400-54471-171112[INC][1/271][UPT]	chr9	17630429	17630354	17630424	6456	SH3GL2	intron	5	0	0.0128734	0.574506	0.574506
chr9_17630429_A_G	Brain_Spinal_cord_cervical_c-1||chr9_17630429_A_G||chr9:17579287:17747066:clu_38921:ENSG00000107295.9	Brain_Spinal_cord_cervical_c-1||chr9_17630429_A_G||chr9:17579287:17747066:clu_38921:ENSG00000107295.9||CA-6456-3334-54400-54471-171112[INC][1/271][UPT]	CA-6456-3334-54400-54471-171112[INC][1/271][UPT]	chr9	17630429	17630354	17630424	6456	SH3GL2	intron	5	0	0.0128734	0.574506	0.574506
chr14_102263544_A_G	Brain_Anterior_cingulate_cortex_BA24||chr14_102263544_A_G||chr14:102251995:102283478:clu_15900:ENSG00000080823.22	Brain_Anterior_cingulate_cortex_BA24||chr14_102263544_A_G||chr14:102251995:102283478:clu_15900:ENSG00000080823.22||CA-5891-24723-44584-44655-56205[INC][28/27]	CA-5891-24723-44584-44655-56205[INC][28/27]	chr14	102263544	102263546	102263616	5891	MOK	intron	2	1	0.566587	-0.553279	0.553279
chr14_102263544_A_G	Brain_Caudate_basal_ganglia||chr14_102263544_A_G||chr14:102251995:102283478:clu_18042:ENSG00000080823.22	Brain_Caudate_basal_ganglia||chr14_102263544_A_G||chr14:102251995:102283478:clu_18042:ENSG00000080823.22||CA-5891-24723-44584-44655-56205[INC][28/27]	CA-5891-24723-44584-44655-56205[INC][28/27]	chr14	102263544	102263546	102263616	5891	MOK	intron	2	1	0.566587	-0.553279	0.553279
chr14_102263544_A_G	Brain_Cerebellar_Hemisphere||chr14_102263544_A_G||chr14:102251995:102283478:clu_19095:ENSG00000080823.22	Brain_Cerebellar_Hemisphere||chr14_102263544_A_G||chr14:102251995:102283478:clu_19095:ENSG00000080823.22||CA-5891-24723-44584-44655-56205[INC][28/27]	CA-5891-24723-44584-44655-56205[INC][28/27]	chr14	102263544	102263546	102263616	5891	MOK	intron	2	1	0.566587	-0.553279	0.553279
chr14_102263544_A_G	Brain_Cerebellum||chr14_102263544_A_G||chr14:102251995:102283478:clu_19997:ENSG00000080823.22	Brain_Cerebellum||chr14_102263544_A_G||chr14:102251995:102283478:clu_19997:ENSG00000080823.22||CA-5891-24723-44584-44655-56205[INC][28/27]	CA-5891-24723-44584-44655-56205[INC][28/27]	chr14	102263544	102263546	102263616	5891	MOK	intron	2	1	0.566587	-0.553279	0.553279
chr14_102263544_A_G	Brain_Cortex||chr14_102263544_A_G||chr14:102251995:102283478:clu_18550:ENSG00000080823.22	Brain_Cortex||chr14_102263544_A_G||chr14:102251995:102283478:clu_18550:ENSG00000080823.22||CA-5891-24723-44584-44655-56205[INC][28/27]	CA-5891-24723-44584-44655-56205[INC][28/27]	chr14	102263544	102263546	102263616	5891	MOK	intron	2	1	0.566587	-0.553279	0.553279
chr14_102263544_A_G	Brain_Frontal_Cortex_BA9||chr14_102263544_A_G||chr14:102251995:102283478:clu_17194:ENSG00000080823.22	Brain_Frontal_Cortex_BA9||chr14_102263544_A_G||chr14:102251995:102283478:clu_17194:ENSG00000080823.22||CA-5891-24723-44584-44655-56205[INC][28/27]	CA-5891-24723-44584-44655-56205[INC][28/27]	chr14	102263544	102263546	102263616	5891	MOK	intron	2	1	0.566587	-0.553279	0.553279
chr14_102263544_A_G	Brain_Nucleus_accumbens_basal_ganglia||chr14_102263544_A_G||chr14:102251995:102283478:clu_18448:ENSG00000080823.22	Brain_Nucleus_accumbens_basal_ganglia||chr14_102263544_A_G||chr14:102251995:102283478:clu_18448:ENSG00000080823.22||CA-5891-24723-44584-44655-56205[INC][28/27]	CA-5891-24723-44584-44655-56205[INC][28/27]	chr14	102263544	102263546	102263616	5891	MOK	intron	2	1	0.566587	-0.553279	0.553279
chr17_80422204_A_G	Brain_Anterior_cingulate_cortex_BA24||chr17_80422204_A_G||chr17:80415821:80423520:clu_10981:ENSG00000173818.16	Brain_Anterior_cingulate_cortex_BA24||chr17_80422204_A_G||chr17:80415821:80423520:clu_10981:ENSG00000173818.16||CA-284131-3655-10039-10079-11353[INC][44/15]	CA-284131-3655-10039-10079-11353[INC][44/15]	chr17	80422204	80422206	80422245	284131	ENDOV	intron	2	1	0.82331	-0.538716	0.538716
chr17_80422204_A_G	Brain_Cerebellum||chr17_80422204_A_G||chr17:80415821:80423520:clu_13552:ENSG00000173818.16	Brain_Cerebellum||chr17_80422204_A_G||chr17:80415821:80423520:clu_13552:ENSG00000173818.16||CA-284131-3655-10039-10079-11353[INC][44/15]	CA-284131-3655-10039-10079-11353[INC][44/15]	chr17	80422204	80422206	80422245	284131	ENDOV	intron	2	1	0.82331	-0.538716	0.538716
chr17_80422204_A_G	Brain_Cortex||chr17_80422204_A_G||chr17:80415821:80423520:clu_12863:ENSG00000173818.16	Brain_Cortex||chr17_80422204_A_G||chr17:80415821:80423520:clu_12863:ENSG00000173818.16||CA-284131-3655-10039-10079-11353[INC][44/15]	CA-284131-3655-10039-10079-11353[INC][44/15]	chr17	80422204	80422206	80422245	284131	ENDOV	intron	2	1	0.82331	-0.538716	0.538716
chr19_1534043_T_C	Brain_Cerebellar_Hemisphere||chr19_1534043_T_C||chr19:1531883:1535065:clu_19450:ENSG00000185988.11	Brain_Cerebellar_Hemisphere||chr19_1534043_T_C||chr19:1531883:1535065:clu_19450:ENSG00000185988.11||CA-126520-10810-12857-12968-13991[INC][5/2][DNT]	CA-126520-10810-12857-12968-13991[INC][5/2][DNT]	chr19	1534043	1533931	1534041	126520	PLK5	intron	2	1	0.882119	-0.46065	0.46065
chr19_1534043_T_C	Brain_Cerebellum||chr19_1534043_T_C||chr19:1531883:1535065:clu_20374:ENSG00000185988.11	Brain_Cerebellum||chr19_1534043_T_C||chr19:1531883:1535065:clu_20374:ENSG00000185988.11||CA-126520-10810-12857-12968-13991[INC][5/2][DNT]	CA-126520-10810-12857-12968-13991[INC][5/2][DNT]	chr19	1534043	1533931	1534041	126520	PLK5	intron	2	1	0.882119	-0.46065	0.46065
chr6_27395095_T_G	Brain_Cortex||chr6_27395095_T_G||chr6:27389075:27399442:clu_28553:ENSG00000124613.8	Brain_Cortex||chr6_27395095_T_G||chr6:27389075:27399442:clu_28553:ENSG00000124613.8||CA-346157-17441-23382-23461-27807[INC][5/11][UPT]	CA-346157-17441-23382-23461-27807[INC][5/11][UPT]	chr6	27395095	27395017	27395095	346157	ZNF391	exon	0	0	0.0520457	0.448665	0.448665
chr6_27395095_T_G	Brain_Spinal_cord_cervical_c-1||chr6_27395095_T_G||chr6:27389075:27399442:clu_24221:ENSG00000124613.8	Brain_Spinal_cord_cervical_c-1||chr6_27395095_T_G||chr6:27389075:27399442:clu_24221:ENSG00000124613.8||CA-346157-17441-23382-23461-27807[INC][5/11][UPT]	CA-346157-17441-23382-23461-27807[INC][5/11][UPT]	chr6	27395095	27395017	27395095	346157	ZNF391	exon	0	0	0.0520457	0.448665	0.448665
chr1_111139496_C_T	Brain_Caudate_basal_ganglia||chr1_111139496_C_T||chr1:111137586:111140038:clu_42411:ENSG00000156171.14	Brain_Caudate_basal_ganglia||chr1_111139496_C_T||chr1:111137586:111140038:clu_42411:ENSG00000156171.14||CA-128338-3179-3550-3716-5630[INC][51/50][UPT]	CA-128338-3179-3550-3716-5630[INC][51/50][UPT]	chr1	111139496	111139501	111139666	128338	DRAM2	intron	5	0	0.607248	-0.401576	0.401576
chr1_111139496_C_T	Brain_Putamen_basal_ganglia||chr1_111139496_C_T||chr1:111137586:111140038:clu_37805:ENSG00000156171.14	Brain_Putamen_basal_ganglia||chr1_111139496_C_T||chr1:111137586:111140038:clu_37805:ENSG00000156171.14||CA-128338-3179-3550-3716-5630[INC][51/50][UPT]	CA-128338-3179-3550-3716-5630[INC][51/50][UPT]	chr1	111139496	111139501	111139666	10390	CEPT1	intron	5	0	0.607248	-0.401576	0.401576
chr5_96740783_G_A	Brain_Amygdala||chr5_96740783_G_A||chr5:96740118:96741266:clu_25205:ENSG00000153113.23	Brain_Amygdala||chr5_96740783_G_A||chr5:96740118:96741266:clu_25205:ENSG00000153113.23||CA-831-81082-81708-81747-82229[INC][94/50]	CA-831-81082-81708-81747-82229[INC][94/50]	chr5	96740783	96740745	96740783	831	CAST	exon	0	0	0.65895	-0.400035	0.400035
chr5_96740783_G_A	Brain_Anterior_cingulate_cortex_BA24||chr5_96740783_G_A||chr5:96740118:96741266:clu_27116:ENSG00000153113.23	Brain_Anterior_cingulate_cortex_BA24||chr5_96740783_G_A||chr5:96740118:96741266:clu_27116:ENSG00000153113.23||CA-831-81082-81708-81747-82229[INC][94/50]	CA-831-81082-81708-81747-82229[INC][94/50]	chr5	96740783	96740745	96740783	831	CAST	exon	0	0	0.65895	-0.400035	0.400035
chr5_96740783_G_A	Brain_Caudate_basal_ganglia||chr5_96740783_G_A||chr5:96740118:96741266:clu_30699:ENSG00000153113.23	Brain_Caudate_basal_ganglia||chr5_96740783_G_A||chr5:96740118:96741266:clu_30699:ENSG00000153113.23||CA-831-81082-81708-81747-82229[INC][94/50]	CA-831-81082-81708-81747-82229[INC][94/50]	chr5	96740783	96740745	96740783	831	CAST	exon	0	0	0.65895	-0.400035	0.400035
chr5_96740783_G_A	Brain_Cerebellar_Hemisphere||chr5_96740783_G_A||chr5:96740118:96741266:clu_32261:ENSG00000153113.23	Brain_Cerebellar_Hemisphere||chr5_96740783_G_A||chr5:96740118:96741266:clu_32261:ENSG00000153113.23||CA-831-81082-81708-81747-82229[INC][94/50]	CA-831-81082-81708-81747-82229[INC][94/50]	chr5	96740783	96740745	96740783	831	CAST	exon	0	0	0.65895	-0.400035	0.400035
chr5_96740783_G_A	Brain_Cerebellum||chr5_96740783_G_A||chr5:96740118:96741266:clu_33829:ENSG00000153113.23	Brain_Cerebellum||chr5_96740783_G_A||chr5:96740118:96741266:clu_33829:ENSG00000153113.23||CA-831-81082-81708-81747-82229[INC][94/50]	CA-831-81082-81708-81747-82229[INC][94/50]	chr5	96740783	96740745	96740783	831	CAST	exon	0	0	0.65895	-0.400035	0.400035
chr5_96740783_G_A	Brain_Cortex||chr5_96740783_G_A||chr5:96740118:96741266:clu_31607:ENSG00000153113.23	Brain_Cortex||chr5_96740783_G_A||chr5:96740118:96741266:clu_31607:ENSG00000153113.23||CA-831-81082-81708-81747-82229[INC][94/50]	CA-831-81082-81708-81747-82229[INC][94/50]	chr5	96740783	96740745	96740783	831	CAST	exon	0	0	0.65895	-0.400035	0.400035
chr5_96740783_G_A	Brain_Frontal_Cortex_BA9||chr5_96740783_G_A||chr5:96740118:96741266:clu_29365:ENSG00000153113.23	Brain_Frontal_Cortex_BA9||chr5_96740783_G_A||chr5:96740118:96741266:clu_29365:ENSG00000153113.23||CA-831-81082-81708-81747-82229[INC][94/50]	CA-831-81082-81708-81747-82229[INC][94/50]	chr5	96740783	96740745	96740783	831	CAST	exon	0	0	0.65895	-0.400035	0.400035
chr5_96740783_G_A	Brain_Hippocampus||chr5_96740783_G_A||chr5:96740118:96741266:clu_27975:ENSG00000153113.23	Brain_Hippocampus||chr5_96740783_G_A||chr5:96740118:96741266:clu_27975:ENSG00000153113.23||CA-831-81082-81708-81747-82229[INC][94/50]	CA-831-81082-81708-81747-82229[INC][94/50]	chr5	96740783	96740745	96740783	831	CAST	exon	0	0	0.65895	-0.400035	0.400035
chr5_96740783_G_A	Brain_Hypothalamus||chr5_96740783_G_A||chr5:96740118:96741266:clu_29981:ENSG00000153113.23	Brain_Hypothalamus||chr5_96740783_G_A||chr5:96740118:96741266:clu_29981:ENSG00000153113.23||CA-831-81082-81708-81747-82229[INC][94/50]	CA-831-81082-81708-81747-82229[INC][94/50]	chr5	96740783	96740745	96740783	831	CAST	exon	0	0	0.65895	-0.400035	0.400035
chr5_96740783_G_A	Brain_Nucleus_accumbens_basal_ganglia||chr5_96740783_G_A||chr5:96740118:96741266:clu_31392:ENSG00000153113.23	Brain_Nucleus_accumbens_basal_ganglia||chr5_96740783_G_A||chr5:96740118:96741266:clu_31392:ENSG00000153113.23||CA-831-81082-81708-81747-82229[INC][94/50]	CA-831-81082-81708-81747-82229[INC][94/50]	chr5	96740783	96740745	96740783	831	CAST	exon	0	0	0.65895	-0.400035	0.400035
chr5_96740783_G_A	Brain_Putamen_basal_ganglia||chr5_96740783_G_A||chr5:96740118:96741266:clu_27484:ENSG00000153113.23	Brain_Putamen_basal_ganglia||chr5_96740783_G_A||chr5:96740118:96741266:clu_27484:ENSG00000153113.23||CA-831-81082-81708-81747-82229[INC][94/50]	CA-831-81082-81708-81747-82229[INC][94/50]	chr5	96740783	96740745	96740783	831	CAST	exon	0	0	0.65895	-0.400035	0.400035
chr5_96740783_G_A	Brain_Spinal_cord_cervical_c-1||chr5_96740783_G_A||chr5:96740118:96741266:clu_26833:ENSG00000153113.23	Brain_Spinal_cord_cervical_c-1||chr5_96740783_G_A||chr5:96740118:96741266:clu_26833:ENSG00000153113.23||CA-831-81082-81708-81747-82229[INC][94/50]	CA-831-81082-81708-81747-82229[INC][94/50]	chr5	96740783	96740745	96740783	831	CAST	exon	0	0	0.65895	-0.400035	0.400035
chr5_96740783_G_A	Brain_Substantia_nigra||chr5_96740783_G_A||chr5:96740118:96741266:clu_24224:ENSG00000153113.23	Brain_Substantia_nigra||chr5_96740783_G_A||chr5:96740118:96741266:clu_24224:ENSG00000153113.23||CA-831-81082-81708-81747-82229[INC][94/50]	CA-831-81082-81708-81747-82229[INC][94/50]	chr5	96740783	96740745	96740783	831	CAST	exon	0	0	0.65895	-0.400035	0.400035
chr8_101887222_T_C	Brain_Amygdala||chr8_101887222_T_C||chr8:101719648:101915809:clu_39066:ENSG00000104490.17	Brain_Amygdala||chr8_101887222_T_C||chr8:101719648:101915809:clu_39066:ENSG00000104490.17||CA-83988-212099-240680-240767-408259[INC][32/98]	CA-83988-212099-240680-240767-408259[INC][32/98]	chr8	101887222	101887141	101887227	83988	NCALD	exon	5	0	0.250227	0.384243	0.384243
chr8_101887222_T_C	Brain_Caudate_basal_ganglia||chr8_101887222_T_C||chr8:101719648:101915809:clu_47817:ENSG00000104490.17	Brain_Caudate_basal_ganglia||chr8_101887222_T_C||chr8:101719648:101915809:clu_47817:ENSG00000104490.17||CA-83988-212099-240680-240767-408259[INC][32/98]	CA-83988-212099-240680-240767-408259[INC][32/98]	chr8	101887222	101887141	101887227	83988	NCALD	exon	5	0	0.250227	0.384243	0.384243
chr8_101887222_T_C	Brain_Cortex||chr8_101887222_T_C||chr8:101719648:101915809:clu_49181:ENSG00000104490.17	Brain_Cortex||chr8_101887222_T_C||chr8:101719648:101915809:clu_49181:ENSG00000104490.17||CA-83988-212099-240680-240767-408259[INC][32/98]	CA-83988-212099-240680-240767-408259[INC][32/98]	chr8	101887222	101887141	101887227	83988	NCALD	exon	5	0	0.250227	0.384243	0.384243
chr8_101887222_T_C	Brain_Frontal_Cortex_BA9||chr8_101887222_T_C||chr8:101719648:101915809:clu_45767:ENSG00000104490.17	Brain_Frontal_Cortex_BA9||chr8_101887222_T_C||chr8:101719648:101915809:clu_45767:ENSG00000104490.17||CA-83988-212099-240680-240767-408259[INC][32/98]	CA-83988-212099-240680-240767-408259[INC][32/98]	chr8	101887222	101887141	101887227	83988	NCALD	exon	5	0	0.250227	0.384243	0.384243
chr8_101887222_T_C	Brain_Putamen_basal_ganglia||chr8_101887222_T_C||chr8:101719648:101915809:clu_42599:ENSG00000104490.17	Brain_Putamen_basal_ganglia||chr8_101887222_T_C||chr8:101719648:101915809:clu_42599:ENSG00000104490.17||CA-83988-212099-240680-240767-408259[INC][32/98]	CA-83988-212099-240680-240767-408259[INC][32/98]	chr8	101887222	101887141	101887227	83988	NCALD	exon	5	0	0.250227	0.384243	0.384243
chr11_3361740_T_G	Brain_Cerebellar_Hemisphere||chr11_3361740_T_G||chr11:3360565:3370975:clu_5383:ENSG00000005801.16	Brain_Cerebellar_Hemisphere||chr11_3361740_T_G||chr11:3360565:3370975:clu_5383:ENSG00000005801.16||CA-7748-11248-20333-20480-21657[INC][21/43][DNT]	CA-7748-11248-20333-20480-21657[INC][21/43][DNT]	chr11	3361740	3361743	3361889	7748	ZNF195	intron	3	0	0.805906	-0.378987	0.378987
chr11_3361740_T_G	Brain_Cerebellum||chr11_3361740_T_G||chr11:3360565:3370975:clu_5627:ENSG00000005801.16	Brain_Cerebellum||chr11_3361740_T_G||chr11:3360565:3370975:clu_5627:ENSG00000005801.16||CA-7748-11248-20333-20480-21657[INC][21/43][DNT]	CA-7748-11248-20333-20480-21657[INC][21/43][DNT]	chr11	3361740	3361743	3361889	7748	ZNF195	intron	3	0	0.805906	-0.378987	0.378987
chr11_3361740_T_G	Brain_Frontal_Cortex_BA9||chr11_3361740_T_G||chr11:3360565:3370975:clu_4931:ENSG00000005801.16	Brain_Frontal_Cortex_BA9||chr11_3361740_T_G||chr11:3360565:3370975:clu_4931:ENSG00000005801.16||CA-7748-11248-20333-20480-21657[INC][21/43][DNT]	CA-7748-11248-20333-20480-21657[INC][21/43][DNT]	chr11	3361740	3361743	3361889	7748	ZNF195	intron	3	0	0.805906	-0.378987	0.378987
chr1_111139496_C_T	Brain_Caudate_basal_ganglia||chr1_111139496_C_T||chr1:111137586:111140038:clu_42411:ENSG00000156171.14	Brain_Caudate_basal_ganglia||chr1_111139496_C_T||chr1:111137586:111140038:clu_42411:ENSG00000156171.14||CA-128338-3179-3505-3716-5630[INC][26/50][UPT]	CA-128338-3179-3505-3716-5630[INC][26/50][UPT]	chr1	111139496	111139501	111139711	128338	DRAM2	intron	5	0	0.616047	-0.377502	0.377502
chr1_111139496_C_T	Brain_Putamen_basal_ganglia||chr1_111139496_C_T||chr1:111137586:111140038:clu_37805:ENSG00000156171.14	Brain_Putamen_basal_ganglia||chr1_111139496_C_T||chr1:111137586:111140038:clu_37805:ENSG00000156171.14||CA-128338-3179-3505-3716-5630[INC][26/50][UPT]	CA-128338-3179-3505-3716-5630[INC][26/50][UPT]	chr1	111139496	111139501	111139711	128338	DRAM2	intron	5	0	0.616047	-0.377502	0.377502
chr8_123142457_G_T	Brain_Amygdala||chr8_123142457_G_T||chr8:123140901:123144717:clu_39185:ENSG00000156787.16	Brain_Amygdala||chr8_123142457_G_T||chr8:123140901:123144717:clu_39185:ENSG00000156787.16||CA-93594-71283-72643-72838-75098[INC][22/9]	CA-93594-71283-72643-72838-75098[INC][22/9]	chr8	123142457	123142262	123142456	93594	WDR67	intron	1	1	0.426627	-0.374053	0.374053
chr8_123142457_G_T	Brain_Anterior_cingulate_cortex_BA24||chr8_123142457_G_T||chr8:123140901:123144717:clu_42297:ENSG00000156787.16	Brain_Anterior_cingulate_cortex_BA24||chr8_123142457_G_T||chr8:123140901:123144717:clu_42297:ENSG00000156787.16||CA-93594-71283-72643-72838-75098[INC][22/9]	CA-93594-71283-72643-72838-75098[INC][22/9]	chr8	123142457	123142262	123142456	93594	WDR67	intron	1	1	0.426627	-0.374053	0.374053
chr8_123142457_G_T	Brain_Caudate_basal_ganglia||chr8_123142457_G_T||chr8:123140901:123144717:clu_47959:ENSG00000156787.16	Brain_Caudate_basal_ganglia||chr8_123142457_G_T||chr8:123140901:123144717:clu_47959:ENSG00000156787.16||CA-93594-71283-72643-72838-75098[INC][22/9]	CA-93594-71283-72643-72838-75098[INC][22/9]	chr8	123142457	123142262	123142456	93594	WDR67	intron	1	1	0.426627	-0.374053	0.374053
chr8_123142457_G_T	Brain_Cerebellar_Hemisphere||chr8_123142457_G_T||chr8:123140901:123144717:clu_50159:ENSG00000156787.16	Brain_Cerebellar_Hemisphere||chr8_123142457_G_T||chr8:123140901:123144717:clu_50159:ENSG00000156787.16||CA-93594-71283-72643-72838-75098[INC][22/9]	CA-93594-71283-72643-72838-75098[INC][22/9]	chr8	123142457	123142262	123142456	93594	WDR67	intron	1	1	0.426627	-0.374053	0.374053
chr8_123142457_G_T	Brain_Cerebellum||chr8_123142457_G_T||chr8:123140901:123144717:clu_52731:ENSG00000156787.16	Brain_Cerebellum||chr8_123142457_G_T||chr8:123140901:123144717:clu_52731:ENSG00000156787.16||CA-93594-71283-72643-72838-75098[INC][22/9]	CA-93594-71283-72643-72838-75098[INC][22/9]	chr8	123142457	123142262	123142456	93594	WDR67	intron	1	1	0.426627	-0.374053	0.374053
chr8_123142457_G_T	Brain_Cortex||chr8_123142457_G_T||chr8:123140901:123144717:clu_49332:ENSG00000156787.16	Brain_Cortex||chr8_123142457_G_T||chr8:123140901:123144717:clu_49332:ENSG00000156787.16||CA-93594-71283-72643-72838-75098[INC][22/9]	CA-93594-71283-72643-72838-75098[INC][22/9]	chr8	123142457	123142262	123142456	93594	WDR67	intron	1	1	0.426627	-0.374053	0.374053
chr8_123142457_G_T	Brain_Frontal_Cortex_BA9||chr8_123142457_G_T||chr8:123140901:123144717:clu_45918:ENSG00000156787.16	Brain_Frontal_Cortex_BA9||chr8_123142457_G_T||chr8:123140901:123144717:clu_45918:ENSG00000156787.16||CA-93594-71283-72643-72838-75098[INC][22/9]	CA-93594-71283-72643-72838-75098[INC][22/9]	chr8	123142457	123142262	123142456	93594	WDR67	intron	1	1	0.426627	-0.374053	0.374053
chr8_123142457_G_T	Brain_Hippocampus||chr8_123142457_G_T||chr8:123140901:123144717:clu_43603:ENSG00000156787.16	Brain_Hippocampus||chr8_123142457_G_T||chr8:123140901:123144717:clu_43603:ENSG00000156787.16||CA-93594-71283-72643-72838-75098[INC][22/9]	CA-93594-71283-72643-72838-75098[INC][22/9]	chr8	123142457	123142262	123142456	93594	WDR67	intron	1	1	0.426627	-0.374053	0.374053
chr8_123142457_G_T	Brain_Hypothalamus||chr8_123142457_G_T||chr8:123140901:123144717:clu_46778:ENSG00000156787.16	Brain_Hypothalamus||chr8_123142457_G_T||chr8:123140901:123144717:clu_46778:ENSG00000156787.16||CA-93594-71283-72643-72838-75098[INC][22/9]	CA-93594-71283-72643-72838-75098[INC][22/9]	chr8	123142457	123142262	123142456	93594	WDR67	intron	1	1	0.426627	-0.374053	0.374053
chr8_123142457_G_T	Brain_Nucleus_accumbens_basal_ganglia||chr8_123142457_G_T||chr8:123140901:123144717:clu_49064:ENSG00000156787.16	Brain_Nucleus_accumbens_basal_ganglia||chr8_123142457_G_T||chr8:123140901:123144717:clu_49064:ENSG00000156787.16||CA-93594-71283-72643-72838-75098[INC][22/9]	CA-93594-71283-72643-72838-75098[INC][22/9]	chr8	123142457	123142262	123142456	93594	WDR67	intron	1	1	0.426627	-0.374053	0.374053
chr8_123142457_G_T	Brain_Putamen_basal_ganglia||chr8_123142457_G_T||chr8:123140901:123144717:clu_42730:ENSG00000156787.16	Brain_Putamen_basal_ganglia||chr8_123142457_G_T||chr8:123140901:123144717:clu_42730:ENSG00000156787.16||CA-93594-71283-72643-72838-75098[INC][22/9]	CA-93594-71283-72643-72838-75098[INC][22/9]	chr8	123142457	123142262	123142456	93594	WDR67	intron	1	1	0.426627	-0.374053	0.374053
chr8_123142457_G_T	Brain_Spinal_cord_cervical_c-1||chr8_123142457_G_T||chr8:123140901:123144717:clu_41626:ENSG00000156787.16	Brain_Spinal_cord_cervical_c-1||chr8_123142457_G_T||chr8:123140901:123144717:clu_41626:ENSG00000156787.16||CA-93594-71283-72643-72838-75098[INC][22/9]	CA-93594-71283-72643-72838-75098[INC][22/9]	chr8	123142457	123142262	123142456	93594	WDR67	intron	1	1	0.426627	-0.374053	0.374053
chr8_123142457_G_T	Brain_Substantia_nigra||chr8_123142457_G_T||chr8:123140901:123144717:clu_37492:ENSG00000156787.16	Brain_Substantia_nigra||chr8_123142457_G_T||chr8:123140901:123144717:clu_37492:ENSG00000156787.16||CA-93594-71283-72643-72838-75098[INC][22/9]	CA-93594-71283-72643-72838-75098[INC][22/9]	chr8	123142457	123142262	123142456	93594	WDR67	intron	1	1	0.426627	-0.374053	0.374053
chr1_111139496_C_T	Brain_Caudate_basal_ganglia||chr1_111139496_C_T||chr1:111137586:111140038:clu_42411:ENSG00000156171.14	Brain_Caudate_basal_ganglia||chr1_111139496_C_T||chr1:111137586:111140038:clu_42411:ENSG00000156171.14||CA-128338-3179-3502-3716-5630[INC][2/50][UPT]	CA-128338-3179-3502-3716-5630[INC][2/50][UPT]	chr1	111139496	111139501	111139714	10390	CEPT1	intron	5	0	0.443871	-0.369297	0.369297
chr1_111139496_C_T	Brain_Putamen_basal_ganglia||chr1_111139496_C_T||chr1:111137586:111140038:clu_37805:ENSG00000156171.14	Brain_Putamen_basal_ganglia||chr1_111139496_C_T||chr1:111137586:111140038:clu_37805:ENSG00000156171.14||CA-128338-3179-3502-3716-5630[INC][2/50][UPT]	CA-128338-3179-3502-3716-5630[INC][2/50][UPT]	chr1	111139496	111139501	111139714	10390	CEPT1	intron	5	0	0.443871	-0.369297	0.369297
chr5_875889_G_C	Brain_Anterior_cingulate_cortex_BA24||chr5_875889_G_C||chr5:871564:876101:clu_26362:ENSG00000028310.17	Brain_Anterior_cingulate_cortex_BA24||chr5_875889_G_C||chr5:871564:876101:clu_26362:ENSG00000028310.17||CA-65980-19724-19883-19931-24260[INC][1/51]	CA-65980-19724-19883-19931-24260[INC][1/51]	chr5	875889	875894	875941	65980	BRD9	intron	5	0	0.00451213	0.346397	0.346397
chr5_875889_G_C	Brain_Caudate_basal_ganglia||chr5_875889_G_C||chr5:871564:876101:clu_29825:ENSG00000028310.17	Brain_Caudate_basal_ganglia||chr5_875889_G_C||chr5:871564:876101:clu_29825:ENSG00000028310.17||CA-65980-19724-19883-19931-24260[INC][1/51]	CA-65980-19724-19883-19931-24260[INC][1/51]	chr5	875889	875894	875941	65980	BRD9	intron	5	0	0.00451213	0.346397	0.346397
chr5_875889_G_C	Brain_Cerebellar_Hemisphere||chr5_875889_G_C||chr5:871564:876101:clu_31432:ENSG00000028310.17	Brain_Cerebellar_Hemisphere||chr5_875889_G_C||chr5:871564:876101:clu_31432:ENSG00000028310.17||CA-65980-19724-19883-19931-24260[INC][1/51]	CA-65980-19724-19883-19931-24260[INC][1/51]	chr5	875889	875894	875941	65980	BRD9	intron	5	0	0.00451213	0.346397	0.346397
chr5_875889_G_C	Brain_Cerebellum||chr5_875889_G_C||chr5:871564:876101:clu_32963:ENSG00000028310.17	Brain_Cerebellum||chr5_875889_G_C||chr5:871564:876101:clu_32963:ENSG00000028310.17||CA-65980-19724-19883-19931-24260[INC][1/51]	CA-65980-19724-19883-19931-24260[INC][1/51]	chr5	875889	875894	875941	65980	BRD9	intron	5	0	0.00451213	0.346397	0.346397
chr5_875889_G_C	Brain_Cortex||chr5_875889_G_C||chr5:871564:876101:clu_30716:ENSG00000028310.17	Brain_Cortex||chr5_875889_G_C||chr5:871564:876101:clu_30716:ENSG00000028310.17||CA-65980-19724-19883-19931-24260[INC][1/51]	CA-65980-19724-19883-19931-24260[INC][1/51]	chr5	875889	875894	875941	65980	BRD9	intron	5	0	0.00451213	0.346397	0.346397
chr5_875889_G_C	Brain_Frontal_Cortex_BA9||chr5_875889_G_C||chr5:871564:876101:clu_28548:ENSG00000028310.17	Brain_Frontal_Cortex_BA9||chr5_875889_G_C||chr5:871564:876101:clu_28548:ENSG00000028310.17||CA-65980-19724-19883-19931-24260[INC][1/51]	CA-65980-19724-19883-19931-24260[INC][1/51]	chr5	875889	875894	875941	65980	BRD9	intron	5	0	0.00451213	0.346397	0.346397
chr5_875889_G_C	Brain_Hippocampus||chr5_875889_G_C||chr5:871564:876101:clu_27210:ENSG00000028310.17	Brain_Hippocampus||chr5_875889_G_C||chr5:871564:876101:clu_27210:ENSG00000028310.17||CA-65980-19724-19883-19931-24260[INC][1/51]	CA-65980-19724-19883-19931-24260[INC][1/51]	chr5	875889	875894	875941	65980	BRD9	intron	5	0	0.00451213	0.346397	0.346397
chr5_875889_G_C	Brain_Hypothalamus||chr5_875889_G_C||chr5:871564:876101:clu_29144:ENSG00000028310.17	Brain_Hypothalamus||chr5_875889_G_C||chr5:871564:876101:clu_29144:ENSG00000028310.17||CA-65980-19724-19883-19931-24260[INC][1/51]	CA-65980-19724-19883-19931-24260[INC][1/51]	chr5	875889	875894	875941	65980	BRD9	intron	5	0	0.00451213	0.346397	0.346397
chr5_875889_G_C	Brain_Nucleus_accumbens_basal_ganglia||chr5_875889_G_C||chr5:871564:876101:clu_30484:ENSG00000028310.17	Brain_Nucleus_accumbens_basal_ganglia||chr5_875889_G_C||chr5:871564:876101:clu_30484:ENSG00000028310.17||CA-65980-19724-19883-19931-24260[INC][1/51]	CA-65980-19724-19883-19931-24260[INC][1/51]	chr5	875889	875894	875941	65980	BRD9	intron	5	0	0.00451213	0.346397	0.346397
chr5_875889_G_C	Brain_Putamen_basal_ganglia||chr5_875889_G_C||chr5:871564:876101:clu_26746:ENSG00000028310.17	Brain_Putamen_basal_ganglia||chr5_875889_G_C||chr5:871564:876101:clu_26746:ENSG00000028310.17||CA-65980-19724-19883-19931-24260[INC][1/51]	CA-65980-19724-19883-19931-24260[INC][1/51]	chr5	875889	875894	875941	65980	BRD9	intron	5	0	0.00451213	0.346397	0.346397
chr5_875889_G_C	Brain_Spinal_cord_cervical_c-1||chr5_875889_G_C||chr5:871564:876101:clu_26100:ENSG00000028310.17	Brain_Spinal_cord_cervical_c-1||chr5_875889_G_C||chr5:871564:876101:clu_26100:ENSG00000028310.17||CA-65980-19724-19883-19931-24260[INC][1/51]	CA-65980-19724-19883-19931-24260[INC][1/51]	chr5	875889	875894	875941	65980	BRD9	intron	5	0	0.00451213	0.346397	0.346397
chr5_875889_G_C	Brain_Substantia_nigra||chr5_875889_G_C||chr5:871564:876101:clu_23572:ENSG00000028310.17	Brain_Substantia_nigra||chr5_875889_G_C||chr5:871564:876101:clu_23572:ENSG00000028310.17||CA-65980-19724-19883-19931-24260[INC][1/51]	CA-65980-19724-19883-19931-24260[INC][1/51]	chr5	875889	875894	875941	65980	BRD9	intron	5	0	0.00451213	0.346397	0.346397
chr19_57492212_G_A	Brain_Amygdala||chr19_57492212_G_A||chr19:57491597:57492856:clu_17475:ENSG00000105136.20	Brain_Amygdala||chr19_57492212_G_A||chr19:57491597:57492856:clu_17475:ENSG00000105136.20||CA-79744-6887-7402-7501-8145[INC][49/19][DNT]	CA-79744-6887-7402-7501-8145[INC][49/19][DNT]	chr19	57492212	57492113	57492211	79744	ZNF419	intron	1	1	0.609001	-0.333917	0.333917
chr19_57492212_G_A	Brain_Amygdala||chr19_57492212_G_A||chr19:57491597:57492856:clu_17475:ENSG00000152439.12	Brain_Amygdala||chr19_57492212_G_A||chr19:57491597:57492856:clu_17475:ENSG00000152439.12||CA-79744-6887-7402-7501-8145[INC][49/19][DNT]	CA-79744-6887-7402-7501-8145[INC][49/19][DNT]	chr19	57492212	57492113	57492211	79744	ZNF419	intron	1	1	0.609001	-0.333917	0.333917
chr19_57492212_G_A	Brain_Anterior_cingulate_cortex_BA24||chr19_57492212_G_A||chr19:57491597:57492856:clu_18766:ENSG00000105136.20	Brain_Anterior_cingulate_cortex_BA24||chr19_57492212_G_A||chr19:57491597:57492856:clu_18766:ENSG00000105136.20||CA-79744-6887-7402-7501-8145[INC][49/19][DNT]	CA-79744-6887-7402-7501-8145[INC][49/19][DNT]	chr19	57492212	57492113	57492211	79744	ZNF419	intron	1	1	0.609001	-0.333917	0.333917
chr19_57492212_G_A	Brain_Anterior_cingulate_cortex_BA24||chr19_57492212_G_A||chr19:57491597:57492856:clu_18766:ENSG00000152439.12	Brain_Anterior_cingulate_cortex_BA24||chr19_57492212_G_A||chr19:57491597:57492856:clu_18766:ENSG00000152439.12||CA-79744-6887-7402-7501-8145[INC][49/19][DNT]	CA-79744-6887-7402-7501-8145[INC][49/19][DNT]	chr19	57492212	57492113	57492211	79744	ZNF419	intron	1	1	0.609001	-0.333917	0.333917
chr19_57492212_G_A	Brain_Caudate_basal_ganglia||chr19_57492212_G_A||chr19:57491597:57492856:clu_21178:ENSG00000105136.20	Brain_Caudate_basal_ganglia||chr19_57492212_G_A||chr19:57491597:57492856:clu_21178:ENSG00000105136.20||CA-79744-6887-7402-7501-8145[INC][49/19][DNT]	CA-79744-6887-7402-7501-8145[INC][49/19][DNT]	chr19	57492212	57492113	57492211	79744	ZNF419	intron	1	1	0.609001	-0.333917	0.333917
chr19_57492212_G_A	Brain_Caudate_basal_ganglia||chr19_57492212_G_A||chr19:57491597:57492856:clu_21178:ENSG00000152439.12	Brain_Caudate_basal_ganglia||chr19_57492212_G_A||chr19:57491597:57492856:clu_21178:ENSG00000152439.12||CA-79744-6887-7402-7501-8145[INC][49/19][DNT]	CA-79744-6887-7402-7501-8145[INC][49/19][DNT]	chr19	57492212	57492113	57492211	79744	ZNF419	intron	1	1	0.609001	-0.333917	0.333917
chr19_57492212_G_A	Brain_Cerebellar_Hemisphere||chr19_57492212_G_A||chr19:57491597:57492856:clu_22524:ENSG00000105136.20	Brain_Cerebellar_Hemisphere||chr19_57492212_G_A||chr19:57491597:57492856:clu_22524:ENSG00000105136.20||CA-79744-6887-7402-7501-8145[INC][49/19][DNT]	CA-79744-6887-7402-7501-8145[INC][49/19][DNT]	chr19	57492212	57492113	57492211	79744	ZNF419	intron	1	1	0.609001	-0.333917	0.333917
chr19_57492212_G_A	Brain_Cerebellar_Hemisphere||chr19_57492212_G_A||chr19:57491597:57492856:clu_22524:ENSG00000152439.12	Brain_Cerebellar_Hemisphere||chr19_57492212_G_A||chr19:57491597:57492856:clu_22524:ENSG00000152439.12||CA-79744-6887-7402-7501-8145[INC][49/19][DNT]	CA-79744-6887-7402-7501-8145[INC][49/19][DNT]	chr19	57492212	57492113	57492211	79744	ZNF419	intron	1	1	0.609001	-0.333917	0.333917
chr19_57492212_G_A	Brain_Cerebellum||chr19_57492212_G_A||chr19:57491597:57492856:clu_23563:ENSG00000105136.20	Brain_Cerebellum||chr19_57492212_G_A||chr19:57491597:57492856:clu_23563:ENSG00000105136.20||CA-79744-6887-7402-7501-8145[INC][49/19][DNT]	CA-79744-6887-7402-7501-8145[INC][49/19][DNT]	chr19	57492212	57492113	57492211	79744	ZNF419	intron	1	1	0.609001	-0.333917	0.333917
chr19_57492212_G_A	Brain_Cerebellum||chr19_57492212_G_A||chr19:57491597:57492856:clu_23563:ENSG00000152439.12	Brain_Cerebellum||chr19_57492212_G_A||chr19:57491597:57492856:clu_23563:ENSG00000152439.12||CA-79744-6887-7402-7501-8145[INC][49/19][DNT]	CA-79744-6887-7402-7501-8145[INC][49/19][DNT]	chr19	57492212	57492113	57492211	79744	ZNF419	intron	1	1	0.609001	-0.333917	0.333917
chr19_57492212_G_A	Brain_Cortex||chr19_57492212_G_A||chr19:57491597:57492856:clu_21852:ENSG00000105136.20	Brain_Cortex||chr19_57492212_G_A||chr19:57491597:57492856:clu_21852:ENSG00000105136.20||CA-79744-6887-7402-7501-8145[INC][49/19][DNT]	CA-79744-6887-7402-7501-8145[INC][49/19][DNT]	chr19	57492212	57492113	57492211	79744	ZNF419	intron	1	1	0.609001	-0.333917	0.333917
chr19_57492212_G_A	Brain_Cortex||chr19_57492212_G_A||chr19:57491597:57492856:clu_21852:ENSG00000152439.12	Brain_Cortex||chr19_57492212_G_A||chr19:57491597:57492856:clu_21852:ENSG00000152439.12||CA-79744-6887-7402-7501-8145[INC][49/19][DNT]	CA-79744-6887-7402-7501-8145[INC][49/19][DNT]	chr19	57492212	57492113	57492211	79744	ZNF419	intron	1	1	0.609001	-0.333917	0.333917
chr19_57492212_G_A	Brain_Frontal_Cortex_BA9||chr19_57492212_G_A||chr19:57491597:57492856:clu_20273:ENSG00000105136.20	Brain_Frontal_Cortex_BA9||chr19_57492212_G_A||chr19:57491597:57492856:clu_20273:ENSG00000105136.20||CA-79744-6887-7402-7501-8145[INC][49/19][DNT]	CA-79744-6887-7402-7501-8145[INC][49/19][DNT]	chr19	57492212	57492113	57492211	79744	ZNF419	intron	1	1	0.609001	-0.333917	0.333917
chr19_57492212_G_A	Brain_Frontal_Cortex_BA9||chr19_57492212_G_A||chr19:57491597:57492856:clu_20273:ENSG00000152439.12	Brain_Frontal_Cortex_BA9||chr19_57492212_G_A||chr19:57491597:57492856:clu_20273:ENSG00000152439.12||CA-79744-6887-7402-7501-8145[INC][49/19][DNT]	CA-79744-6887-7402-7501-8145[INC][49/19][DNT]	chr19	57492212	57492113	57492211	79744	ZNF419	intron	1	1	0.609001	-0.333917	0.333917
chr19_57492212_G_A	Brain_Hippocampus||chr19_57492212_G_A||chr19:57491597:57492856:clu_19345:ENSG00000105136.20	Brain_Hippocampus||chr19_57492212_G_A||chr19:57491597:57492856:clu_19345:ENSG00000105136.20||CA-79744-6887-7402-7501-8145[INC][49/19][DNT]	CA-79744-6887-7402-7501-8145[INC][49/19][DNT]	chr19	57492212	57492113	57492211	79744	ZNF419	intron	1	1	0.609001	-0.333917	0.333917
chr19_57492212_G_A	Brain_Hippocampus||chr19_57492212_G_A||chr19:57491597:57492856:clu_19345:ENSG00000152439.12	Brain_Hippocampus||chr19_57492212_G_A||chr19:57491597:57492856:clu_19345:ENSG00000152439.12||CA-79744-6887-7402-7501-8145[INC][49/19][DNT]	CA-79744-6887-7402-7501-8145[INC][49/19][DNT]	chr19	57492212	57492113	57492211	79744	ZNF419	intron	1	1	0.609001	-0.333917	0.333917
chr19_57492212_G_A	Brain_Hypothalamus||chr19_57492212_G_A||chr19:57491597:57492856:clu_20703:ENSG00000105136.20	Brain_Hypothalamus||chr19_57492212_G_A||chr19:57491597:57492856:clu_20703:ENSG00000105136.20||CA-79744-6887-7402-7501-8145[INC][49/19][DNT]	CA-79744-6887-7402-7501-8145[INC][49/19][DNT]	chr19	57492212	57492113	57492211	79744	ZNF419	intron	1	1	0.609001	-0.333917	0.333917
chr19_57492212_G_A	Brain_Hypothalamus||chr19_57492212_G_A||chr19:57491597:57492856:clu_20703:ENSG00000152439.12	Brain_Hypothalamus||chr19_57492212_G_A||chr19:57491597:57492856:clu_20703:ENSG00000152439.12||CA-79744-6887-7402-7501-8145[INC][49/19][DNT]	CA-79744-6887-7402-7501-8145[INC][49/19][DNT]	chr19	57492212	57492113	57492211	79744	ZNF419	intron	1	1	0.609001	-0.333917	0.333917
chr19_57492212_G_A	Brain_Nucleus_accumbens_basal_ganglia||chr19_57492212_G_A||chr19:57491597:57492856:clu_21624:ENSG00000105136.20	Brain_Nucleus_accumbens_basal_ganglia||chr19_57492212_G_A||chr19:57491597:57492856:clu_21624:ENSG00000105136.20||CA-79744-6887-7402-7501-8145[INC][49/19][DNT]	CA-79744-6887-7402-7501-8145[INC][49/19][DNT]	chr19	57492212	57492113	57492211	79744	ZNF419	intron	1	1	0.609001	-0.333917	0.333917
chr19_57492212_G_A	Brain_Nucleus_accumbens_basal_ganglia||chr19_57492212_G_A||chr19:57491597:57492856:clu_21624:ENSG00000152439.12	Brain_Nucleus_accumbens_basal_ganglia||chr19_57492212_G_A||chr19:57491597:57492856:clu_21624:ENSG00000152439.12||CA-79744-6887-7402-7501-8145[INC][49/19][DNT]	CA-79744-6887-7402-7501-8145[INC][49/19][DNT]	chr19	57492212	57492113	57492211	79744	ZNF419	intron	1	1	0.609001	-0.333917	0.333917
chr19_57492212_G_A	Brain_Putamen_basal_ganglia||chr19_57492212_G_A||chr19:57491597:57492856:clu_19015:ENSG00000105136.20	Brain_Putamen_basal_ganglia||chr19_57492212_G_A||chr19:57491597:57492856:clu_19015:ENSG00000105136.20||CA-79744-6887-7402-7501-8145[INC][49/19][DNT]	CA-79744-6887-7402-7501-8145[INC][49/19][DNT]	chr19	57492212	57492113	57492211	79744	ZNF419	intron	1	1	0.609001	-0.333917	0.333917
chr19_57492212_G_A	Brain_Putamen_basal_ganglia||chr19_57492212_G_A||chr19:57491597:57492856:clu_19015:ENSG00000152439.12	Brain_Putamen_basal_ganglia||chr19_57492212_G_A||chr19:57491597:57492856:clu_19015:ENSG00000152439.12||CA-79744-6887-7402-7501-8145[INC][49/19][DNT]	CA-79744-6887-7402-7501-8145[INC][49/19][DNT]	chr19	57492212	57492113	57492211	79744	ZNF419	intron	1	1	0.609001	-0.333917	0.333917
chr19_57492212_G_A	Brain_Spinal_cord_cervical_c-1||chr19_57492212_G_A||chr19:57491597:57492856:clu_18552:ENSG00000105136.20	Brain_Spinal_cord_cervical_c-1||chr19_57492212_G_A||chr19:57491597:57492856:clu_18552:ENSG00000105136.20||CA-79744-6887-7402-7501-8145[INC][49/19][DNT]	CA-79744-6887-7402-7501-8145[INC][49/19][DNT]	chr19	57492212	57492113	57492211	79744	ZNF419	intron	1	1	0.609001	-0.333917	0.333917
chr19_57492212_G_A	Brain_Spinal_cord_cervical_c-1||chr19_57492212_G_A||chr19:57491597:57492856:clu_18552:ENSG00000152439.12	Brain_Spinal_cord_cervical_c-1||chr19_57492212_G_A||chr19:57491597:57492856:clu_18552:ENSG00000152439.12||CA-79744-6887-7402-7501-8145[INC][49/19][DNT]	CA-79744-6887-7402-7501-8145[INC][49/19][DNT]	chr19	57492212	57492113	57492211	79744	ZNF419	intron	1	1	0.609001	-0.333917	0.333917
chr19_57492212_G_A	Brain_Substantia_nigra||chr19_57492212_G_A||chr19:57491597:57492856:clu_16776:ENSG00000152439.12	Brain_Substantia_nigra||chr19_57492212_G_A||chr19:57491597:57492856:clu_16776:ENSG00000152439.12||CA-79744-6887-7402-7501-8145[INC][49/19][DNT]	CA-79744-6887-7402-7501-8145[INC][49/19][DNT]	chr19	57492212	57492113	57492211	79744	ZNF419	intron	1	1	0.609001	-0.333917	0.333917
chr5_176629805_C_T	Brain_Cerebellum||chr5_176629805_C_T||chr5:176629663:176630280:clu_34797:ENSG00000074317.10	Brain_Cerebellum||chr5_176629805_C_T||chr5:176629663:176630280:clu_34797:ENSG00000074317.10||CA-6620-3282-3698-3753-3898[INC][1/31][UPT]	CA-6620-3282-3698-3753-3898[INC][1/31][UPT]	chr5	176629805	176629809	176629863	6620	SNCB	intron	4	0	0.0355729	0.307034	0.307034
chr19_57490144_T_A	Brain_Substantia_nigra||chr19_57490144_T_A||chr19:57487983:57491471:clu_16775:ENSG00000105136.20	Brain_Substantia_nigra||chr19_57490144_T_A||chr19:57487983:57491471:clu_16775:ENSG00000105136.20||CA-79744-3273-5436-5475-6760[INC][15/26][UPT]	CA-79744-3273-5436-5475-6760[INC][15/26][UPT]	chr19	57490144	57490147	57490185	79744	ZNF419	intron	3	0	0.627914	-0.305878	0.305878
chr3_183636220_G_A	Brain_Caudate_basal_ganglia||chr3_183636220_G_A||chr3:183635793:183643480:clu_36097:ENSG00000114796.15	Brain_Caudate_basal_ganglia||chr3_183636220_G_A||chr3:183635793:183643480:clu_36097:ENSG00000114796.15||CA-54800-3171-3598-3689-10857[INC][11/37][UPT]	CA-54800-3171-3598-3689-10857[INC][11/37][UPT]	chr3	183636220	183636221	183636311	54800	KLHL24	intron	1	1	0.468728	-0.300365	0.300365
chr3_183636220_G_A	Brain_Cerebellum||chr3_183636220_G_A||chr3:183635793:183650296:clu_39610:ENSG00000114796.15	Brain_Cerebellum||chr3_183636220_G_A||chr3:183635793:183650296:clu_39610:ENSG00000114796.15||CA-54800-3171-3598-3689-17673[INC][3/8][UPT]	CA-54800-3171-3598-3689-17673[INC][3/8][UPT]	chr3	183636220	183636221	183636311	54800	KLHL24	intron	1	1	0.468728	-0.300365	0.300365
chr3_183636220_G_A	Brain_Cortex||chr3_183636220_G_A||chr3:183635793:183643480:clu_37107:ENSG00000114796.15	Brain_Cortex||chr3_183636220_G_A||chr3:183635793:183643480:clu_37107:ENSG00000114796.15||CA-54800-3171-3598-3689-10857[INC][11/37][UPT]	CA-54800-3171-3598-3689-10857[INC][11/37][UPT]	chr3	183636220	183636221	183636311	54800	KLHL24	intron	1	1	0.468728	-0.300365	0.300365
chr3_183636220_G_A	Brain_Frontal_Cortex_BA9||chr3_183636220_G_A||chr3:183635793:183643480:clu_34539:ENSG00000114796.15	Brain_Frontal_Cortex_BA9||chr3_183636220_G_A||chr3:183635793:183643480:clu_34539:ENSG00000114796.15||CA-54800-3171-3598-3689-10857[INC][11/37][UPT]	CA-54800-3171-3598-3689-10857[INC][11/37][UPT]	chr3	183636220	183636221	183636311	54800	KLHL24	intron	1	1	0.468728	-0.300365	0.300365
chr3_183636220_G_A	Brain_Nucleus_accumbens_basal_ganglia||chr3_183636220_G_A||chr3:183635793:183643480:clu_36949:ENSG00000114796.15	Brain_Nucleus_accumbens_basal_ganglia||chr3_183636220_G_A||chr3:183635793:183643480:clu_36949:ENSG00000114796.15||CA-54800-3171-3598-3689-10857[INC][11/37][UPT]	CA-54800-3171-3598-3689-10857[INC][11/37][UPT]	chr3	183636220	183636221	183636311	54800	KLHL24	intron	1	1	0.468728	-0.300365	0.300365
chr5_33994077_T_C	Brain_Cerebellum||chr5_33994077_T_C||chr5:33989502:33998641:clu_33190:ENSG00000242110.7	Brain_Cerebellum||chr5_33994077_T_C||chr5:33989502:33998641:clu_33190:ENSG00000242110.7||CA-23600-252084-256604-256777-261222[INC][1/61]	CA-23600-252084-256604-256777-261222[INC][1/61]	chr5	33994077	33993948	33994120	100534612	C1QTNF3-AMACR	exon	43	0	0.0114699	0.297648	0.297648
chr5_33994077_T_C	Brain_Cortex||chr5_33994077_T_C||chr5:33989502:33998641:clu_30939:ENSG00000242110.7	Brain_Cortex||chr5_33994077_T_C||chr5:33989502:33998641:clu_30939:ENSG00000242110.7||CA-23600-252084-256604-256777-261222[INC][1/61]	CA-23600-252084-256604-256777-261222[INC][1/61]	chr5	33994077	33993948	33994120	23600	AMACR	exon	43	0	0.0114699	0.297648	0.297648
chr5_33994077_T_C	Brain_Hypothalamus||chr5_33994077_T_C||chr5:33989502:33998641:clu_29331:ENSG00000242110.7	Brain_Hypothalamus||chr5_33994077_T_C||chr5:33989502:33998641:clu_29331:ENSG00000242110.7||CA-23600-252084-256604-256777-261222[INC][1/61]	CA-23600-252084-256604-256777-261222[INC][1/61]	chr5	33994077	33993948	33994120	100534612	C1QTNF3-AMACR	exon	43	0	0.0114699	0.297648	0.297648
chr7_43656029_C_T	Brain_Amygdala||chr7_43656029_C_T||chr7:43648652:43729429:clu_21139:ENSG00000106603.18	Brain_Amygdala||chr7_43656029_C_T||chr7:43648652:43729429:clu_21139:ENSG00000106603.18||CA-55744-3113-76388-76509-83889[INC][3/99][UPT]	CA-55744-3113-76388-76509-83889[INC][3/99][UPT]	chr7	43656029	43656033	43656153	55744	C7orf44	intron	4	0	0.0172985	0.268918	0.268918
chr7_43656029_C_T	Brain_Anterior_cingulate_cortex_BA24||chr7_43656029_C_T||chr7:43648652:43729429:clu_22738:ENSG00000106603.18	Brain_Anterior_cingulate_cortex_BA24||chr7_43656029_C_T||chr7:43648652:43729429:clu_22738:ENSG00000106603.18||CA-55744-3113-76388-76509-83889[INC][3/99][UPT]	CA-55744-3113-76388-76509-83889[INC][3/99][UPT]	chr7	43656029	43656033	43656153	55744	C7orf44	intron	4	0	0.0172985	0.268918	0.268918
chr7_43656029_C_T	Brain_Caudate_basal_ganglia||chr7_43656029_C_T||chr7:43648652:43729429:clu_25674:ENSG00000106603.18	Brain_Caudate_basal_ganglia||chr7_43656029_C_T||chr7:43648652:43729429:clu_25674:ENSG00000106603.18||CA-55744-3113-76388-76509-83889[INC][3/99][UPT]	CA-55744-3113-76388-76509-83889[INC][3/99][UPT]	chr7	43656029	43656033	43656153	55744	C7orf44	intron	4	0	0.0172985	0.268918	0.268918
chr7_43656029_C_T	Brain_Cerebellar_Hemisphere||chr7_43656029_C_T||chr7:43648652:43729429:clu_27157:ENSG00000106603.18	Brain_Cerebellar_Hemisphere||chr7_43656029_C_T||chr7:43648652:43729429:clu_27157:ENSG00000106603.18||CA-55744-3113-76388-76509-83889[INC][3/99][UPT]	CA-55744-3113-76388-76509-83889[INC][3/99][UPT]	chr7	43656029	43656033	43656153	55744	C7orf44	intron	4	0	0.0172985	0.268918	0.268918
chr7_43656029_C_T	Brain_Cerebellum||chr7_43656029_C_T||chr7:43648652:43729429:clu_28395:ENSG00000106603.18	Brain_Cerebellum||chr7_43656029_C_T||chr7:43648652:43729429:clu_28395:ENSG00000106603.18||CA-55744-3113-76388-76509-83889[INC][3/99][UPT]	CA-55744-3113-76388-76509-83889[INC][3/99][UPT]	chr7	43656029	43656033	43656153	55744	C7orf44	intron	4	0	0.0172985	0.268918	0.268918
chr7_43656029_C_T	Brain_Cortex||chr7_43656029_C_T||chr7:43648652:43729429:clu_26474:ENSG00000106603.18	Brain_Cortex||chr7_43656029_C_T||chr7:43648652:43729429:clu_26474:ENSG00000106603.18||CA-55744-3113-76388-76509-83889[INC][3/99][UPT]	CA-55744-3113-76388-76509-83889[INC][3/99][UPT]	chr7	43656029	43656033	43656153	55744	C7orf44	intron	4	0	0.0172985	0.268918	0.268918
chr7_43656029_C_T	Brain_Frontal_Cortex_BA9||chr7_43656029_C_T||chr7:43648652:43729429:clu_24577:ENSG00000106603.18	Brain_Frontal_Cortex_BA9||chr7_43656029_C_T||chr7:43648652:43729429:clu_24577:ENSG00000106603.18||CA-55744-3113-76388-76509-83889[INC][3/99][UPT]	CA-55744-3113-76388-76509-83889[INC][3/99][UPT]	chr7	43656029	43656033	43656153	55744	C7orf44	intron	4	0	0.0172985	0.268918	0.268918
chr7_43656029_C_T	Brain_Hippocampus||chr7_43656029_C_T||chr7:43648652:43729429:clu_23417:ENSG00000106603.18	Brain_Hippocampus||chr7_43656029_C_T||chr7:43648652:43729429:clu_23417:ENSG00000106603.18||CA-55744-3113-76388-76509-83889[INC][3/99][UPT]	CA-55744-3113-76388-76509-83889[INC][3/99][UPT]	chr7	43656029	43656033	43656153	55744	C7orf44	intron	4	0	0.0172985	0.268918	0.268918
chr7_43656029_C_T	Brain_Hypothalamus||chr7_43656029_C_T||chr7:43648652:43729429:clu_25084:ENSG00000106603.18	Brain_Hypothalamus||chr7_43656029_C_T||chr7:43648652:43729429:clu_25084:ENSG00000106603.18||CA-55744-3113-76388-76509-83889[INC][3/99][UPT]	CA-55744-3113-76388-76509-83889[INC][3/99][UPT]	chr7	43656029	43656033	43656153	55744	C7orf44	intron	4	0	0.0172985	0.268918	0.268918
chr7_43656029_C_T	Brain_Nucleus_accumbens_basal_ganglia||chr7_43656029_C_T||chr7:43648652:43729429:clu_26205:ENSG00000106603.18	Brain_Nucleus_accumbens_basal_ganglia||chr7_43656029_C_T||chr7:43648652:43729429:clu_26205:ENSG00000106603.18||CA-55744-3113-76388-76509-83889[INC][3/99][UPT]	CA-55744-3113-76388-76509-83889[INC][3/99][UPT]	chr7	43656029	43656033	43656153	55744	C7orf44	intron	4	0	0.0172985	0.268918	0.268918
chr7_43656029_C_T	Brain_Putamen_basal_ganglia||chr7_43656029_C_T||chr7:43648652:43729429:clu_23044:ENSG00000106603.18	Brain_Putamen_basal_ganglia||chr7_43656029_C_T||chr7:43648652:43729429:clu_23044:ENSG00000106603.18||CA-55744-3113-76388-76509-83889[INC][3/99][UPT]	CA-55744-3113-76388-76509-83889[INC][3/99][UPT]	chr7	43656029	43656033	43656153	55744	C7orf44	intron	4	0	0.0172985	0.268918	0.268918
chr7_43656029_C_T	Brain_Spinal_cord_cervical_c-1||chr7_43656029_C_T||chr7:43648652:43729429:clu_22424:ENSG00000106603.18	Brain_Spinal_cord_cervical_c-1||chr7_43656029_C_T||chr7:43648652:43729429:clu_22424:ENSG00000106603.18||CA-55744-3113-76388-76509-83889[INC][3/99][UPT]	CA-55744-3113-76388-76509-83889[INC][3/99][UPT]	chr7	43656029	43656033	43656153	55744	C7orf44	intron	4	0	0.0172985	0.268918	0.268918
chr7_43656029_C_T	Brain_Substantia_nigra||chr7_43656029_C_T||chr7:43648652:43729429:clu_20304:ENSG00000106603.18	Brain_Substantia_nigra||chr7_43656029_C_T||chr7:43648652:43729429:clu_20304:ENSG00000106603.18||CA-55744-3113-76388-76509-83889[INC][3/99][UPT]	CA-55744-3113-76388-76509-83889[INC][3/99][UPT]	chr7	43656029	43656033	43656153	55744	C7orf44	intron	4	0	0.0172985	0.268918	0.268918
chr5_176629805_C_T	Brain_Cerebellum||chr5_176629805_C_T||chr5:176629663:176630280:clu_34797:ENSG00000074317.10	Brain_Cerebellum||chr5_176629805_C_T||chr5:176629663:176630280:clu_34797:ENSG00000074317.10||CA-6620-3282-3596-3753-3898[INC][7/31][UPT]	CA-6620-3282-3596-3753-3898[INC][7/31][UPT]	chr5	176629805	176629809	176629965	6620	SNCB	intron	4	0	0.0385251	0.267802	0.267802
chr22_31945683_A_G	Brain_Amygdala||chr22_31945683_A_G||chr22:31944820:31956139:clu_18598:ENSG00000128245.14	Brain_Amygdala||chr22_31945683_A_G||chr22:31944820:31956139:clu_18598:ENSG00000128245.14||CA-7533-3328-4064-4186-14646[INC][1/207][UPT][DNT]	CA-7533-3328-4064-4186-14646[INC][1/207][UPT][DNT]	chr22	31945683	31945557	31945678	7533	YWHAH	intron	5	0	0.00975161	0.248974	0.248974
chr22_31945683_A_G	Brain_Anterior_cingulate_cortex_BA24||chr22_31945683_A_G||chr22:31944820:31956139:clu_20002:ENSG00000128245.14	Brain_Anterior_cingulate_cortex_BA24||chr22_31945683_A_G||chr22:31944820:31956139:clu_20002:ENSG00000128245.14||CA-7533-3328-4064-4186-14646[INC][1/207][UPT][DNT]	CA-7533-3328-4064-4186-14646[INC][1/207][UPT][DNT]	chr22	31945683	31945557	31945678	7533	YWHAH	intron	5	0	0.00975161	0.248974	0.248974
chr22_31945683_A_G	Brain_Caudate_basal_ganglia||chr22_31945683_A_G||chr22:31944820:31956139:clu_22542:ENSG00000128245.14	Brain_Caudate_basal_ganglia||chr22_31945683_A_G||chr22:31944820:31956139:clu_22542:ENSG00000128245.14||CA-7533-3328-4064-4186-14646[INC][1/207][UPT][DNT]	CA-7533-3328-4064-4186-14646[INC][1/207][UPT][DNT]	chr22	31945683	31945557	31945678	7533	YWHAH	intron	5	0	0.00975161	0.248974	0.248974
chr22_31945683_A_G	Brain_Cerebellar_Hemisphere||chr22_31945683_A_G||chr22:31944820:31956139:clu_23912:ENSG00000128245.14	Brain_Cerebellar_Hemisphere||chr22_31945683_A_G||chr22:31944820:31956139:clu_23912:ENSG00000128245.14||CA-7533-3328-4064-4186-14646[INC][1/207][UPT][DNT]	CA-7533-3328-4064-4186-14646[INC][1/207][UPT][DNT]	chr22	31945683	31945557	31945678	7533	YWHAH	intron	5	0	0.00975161	0.248974	0.248974
chr22_31945683_A_G	Brain_Cerebellum||chr22_31945683_A_G||chr22:31944820:31956139:clu_25007:ENSG00000128245.14	Brain_Cerebellum||chr22_31945683_A_G||chr22:31944820:31956139:clu_25007:ENSG00000128245.14||CA-7533-3328-4064-4186-14646[INC][1/207][UPT][DNT]	CA-7533-3328-4064-4186-14646[INC][1/207][UPT][DNT]	chr22	31945683	31945557	31945678	7533	YWHAH	intron	5	0	0.00975161	0.248974	0.248974
chr22_31945683_A_G	Brain_Cortex||chr22_31945683_A_G||chr22:31944820:31956139:clu_23282:ENSG00000128245.14	Brain_Cortex||chr22_31945683_A_G||chr22:31944820:31956139:clu_23282:ENSG00000128245.14||CA-7533-3328-4064-4186-14646[INC][1/207][UPT][DNT]	CA-7533-3328-4064-4186-14646[INC][1/207][UPT][DNT]	chr22	31945683	31945557	31945678	7533	YWHAH	intron	5	0	0.00975161	0.248974	0.248974
chr22_31945683_A_G	Brain_Frontal_Cortex_BA9||chr22_31945683_A_G||chr22:31944820:31956139:clu_21613:ENSG00000128245.14	Brain_Frontal_Cortex_BA9||chr22_31945683_A_G||chr22:31944820:31956139:clu_21613:ENSG00000128245.14||CA-7533-3328-4064-4186-14646[INC][1/207][UPT][DNT]	CA-7533-3328-4064-4186-14646[INC][1/207][UPT][DNT]	chr22	31945683	31945557	31945678	7533	YWHAH	intron	5	0	0.00975161	0.248974	0.248974
chr22_31945683_A_G	Brain_Hippocampus||chr22_31945683_A_G||chr22:31944820:31956139:clu_20588:ENSG00000128245.14	Brain_Hippocampus||chr22_31945683_A_G||chr22:31944820:31956139:clu_20588:ENSG00000128245.14||CA-7533-3328-4064-4186-14646[INC][1/207][UPT][DNT]	CA-7533-3328-4064-4186-14646[INC][1/207][UPT][DNT]	chr22	31945683	31945557	31945678	7533	YWHAH	intron	5	0	0.00975161	0.248974	0.248974
chr22_31945683_A_G	Brain_Hypothalamus||chr22_31945683_A_G||chr22:31944820:31956139:clu_22029:ENSG00000128245.14	Brain_Hypothalamus||chr22_31945683_A_G||chr22:31944820:31956139:clu_22029:ENSG00000128245.14||CA-7533-3328-4064-4186-14646[INC][1/207][UPT][DNT]	CA-7533-3328-4064-4186-14646[INC][1/207][UPT][DNT]	chr22	31945683	31945557	31945678	7533	YWHAH	intron	5	0	0.00975161	0.248974	0.248974
chr22_31945683_A_G	Brain_Nucleus_accumbens_basal_ganglia||chr22_31945683_A_G||chr22:31944820:31956139:clu_23044:ENSG00000128245.14	Brain_Nucleus_accumbens_basal_ganglia||chr22_31945683_A_G||chr22:31944820:31956139:clu_23044:ENSG00000128245.14||CA-7533-3328-4064-4186-14646[INC][1/207][UPT][DNT]	CA-7533-3328-4064-4186-14646[INC][1/207][UPT][DNT]	chr22	31945683	31945557	31945678	7533	YWHAH	intron	5	0	0.00975161	0.248974	0.248974
chr22_31945683_A_G	Brain_Putamen_basal_ganglia||chr22_31945683_A_G||chr22:31944820:31956139:clu_20257:ENSG00000128245.14	Brain_Putamen_basal_ganglia||chr22_31945683_A_G||chr22:31944820:31956139:clu_20257:ENSG00000128245.14||CA-7533-3328-4064-4186-14646[INC][1/207][UPT][DNT]	CA-7533-3328-4064-4186-14646[INC][1/207][UPT][DNT]	chr22	31945683	31945557	31945678	7533	YWHAH	intron	5	0	0.00975161	0.248974	0.248974
chr22_31945683_A_G	Brain_Spinal_cord_cervical_c-1||chr22_31945683_A_G||chr22:31944820:31956139:clu_19719:ENSG00000128245.14	Brain_Spinal_cord_cervical_c-1||chr22_31945683_A_G||chr22:31944820:31956139:clu_19719:ENSG00000128245.14||CA-7533-3328-4064-4186-14646[INC][1/207][UPT][DNT]	CA-7533-3328-4064-4186-14646[INC][1/207][UPT][DNT]	chr22	31945683	31945557	31945678	7533	YWHAH	intron	5	0	0.00975161	0.248974	0.248974
chr22_31945683_A_G	Brain_Substantia_nigra||chr22_31945683_A_G||chr22:31944820:31956139:clu_17842:ENSG00000128245.14	Brain_Substantia_nigra||chr22_31945683_A_G||chr22:31944820:31956139:clu_17842:ENSG00000128245.14||CA-7533-3328-4064-4186-14646[INC][1/207][UPT][DNT]	CA-7533-3328-4064-4186-14646[INC][1/207][UPT][DNT]	chr22	31945683	31945557	31945678	7533	YWHAH	intron	5	0	0.00975161	0.248974	0.248974
chr1_236543000_T_A	Brain_Anterior_cingulate_cortex_BA24||chr1_236543000_T_A||chr1:236542787:236543560:clu_39231:ENSG00000116977.18	Brain_Anterior_cingulate_cortex_BA24||chr1_236543000_T_A||chr1:236542787:236543560:clu_39231:ENSG00000116977.18||CA-3964-27574-27701-27827-28346[INC][17/40]	CA-3964-27574-27701-27827-28346[INC][17/40]	chr1	236543000	236542915	236543040	3964	LGALS8	exon	40	0	0.391494	-0.235078	0.235078
chr1_236543000_T_A	Brain_Cortex||chr1_236543000_T_A||chr1:236542787:236543560:clu_45695:ENSG00000116977.18	Brain_Cortex||chr1_236543000_T_A||chr1:236542787:236543560:clu_45695:ENSG00000116977.18||CA-3964-27574-27701-27827-28346[INC][17/40]	CA-3964-27574-27701-27827-28346[INC][17/40]	chr1	236543000	236542915	236543040	3964	LGALS8	exon	40	0	0.391494	-0.235078	0.235078
chr1_236543000_T_A	Brain_Frontal_Cortex_BA9||chr1_236543000_T_A||chr1:236542787:236543560:clu_42506:ENSG00000116977.18	Brain_Frontal_Cortex_BA9||chr1_236543000_T_A||chr1:236542787:236543560:clu_42506:ENSG00000116977.18||CA-3964-27574-27701-27827-28346[INC][17/40]	CA-3964-27574-27701-27827-28346[INC][17/40]	chr1	236543000	236542915	236543040	3964	LGALS8	exon	40	0	0.391494	-0.235078	0.235078
chr2_242793_G_C	Brain_Amygdala||chr2_242793_G_C||chr2:234272:247538:clu_29797:ENSG00000035115.21	Brain_Amygdala||chr2_242793_G_C||chr2:234272:247538:clu_29797:ENSG00000035115.21||CA-26751-20329-24995-25069-33594[INC][2/98]	CA-26751-20329-24995-25069-33594[INC][2/98]	chr2	242793	242798	242871	26751	SH3YL1	intron	5	0	0.00464531	0.230555	0.230555
chr2_242793_G_C	Brain_Hippocampus||chr2_242793_G_C||chr2:234272:247538:clu_33096:ENSG00000035115.21	Brain_Hippocampus||chr2_242793_G_C||chr2:234272:247538:clu_33096:ENSG00000035115.21||CA-26751-20329-24995-25069-33594[INC][2/98]	CA-26751-20329-24995-25069-33594[INC][2/98]	chr2	242793	242798	242871	26751	SH3YL1	intron	5	0	0.00464531	0.230555	0.230555
chr2_242793_G_C	Brain_Hypothalamus||chr2_242793_G_C||chr2:234272:247538:clu_35544:ENSG00000035115.21	Brain_Hypothalamus||chr2_242793_G_C||chr2:234272:247538:clu_35544:ENSG00000035115.21||CA-26751-20329-24995-25069-33594[INC][2/98]	CA-26751-20329-24995-25069-33594[INC][2/98]	chr2	242793	242798	242871	26751	SH3YL1	intron	5	0	0.00464531	0.230555	0.230555
chr2_242793_G_C	Brain_Putamen_basal_ganglia||chr2_242793_G_C||chr2:234272:247538:clu_32512:ENSG00000035115.21	Brain_Putamen_basal_ganglia||chr2_242793_G_C||chr2:234272:247538:clu_32512:ENSG00000035115.21||CA-26751-20329-24995-25069-33594[INC][2/98]	CA-26751-20329-24995-25069-33594[INC][2/98]	chr2	242793	242798	242871	26751	SH3YL1	intron	5	0	0.00464531	0.230555	0.230555
chr2_242793_G_C	Brain_Substantia_nigra||chr2_242793_G_C||chr2:234272:247538:clu_28570:ENSG00000035115.21	Brain_Substantia_nigra||chr2_242793_G_C||chr2:234272:247538:clu_28570:ENSG00000035115.21||CA-26751-20329-24995-25069-33594[INC][2/98]	CA-26751-20329-24995-25069-33594[INC][2/98]	chr2	242793	242798	242871	26751	SH3YL1	intron	5	0	0.00464531	0.230555	0.230555
chr19_44485187_C_T	Brain_Cortex||chr19_44485187_C_T||chr19:44484435:44497284:clu_21012:ENSG00000167384.10	Brain_Cortex||chr19_44485187_C_T||chr19:44484435:44497284:clu_21012:ENSG00000167384.10||CA-7733-6240-18366-18488-19088[INC][7/34]	CA-7733-6240-18366-18488-19088[INC][7/34]	chr19	44485187	44485036	44485157	7733	ZNF180	intron	30	0	0.192444	0.228239	0.228239
chr19_44485187_C_T	Brain_Frontal_Cortex_BA9||chr19_44485187_C_T||chr19:44484435:44497284:clu_19487:ENSG00000167384.10	Brain_Frontal_Cortex_BA9||chr19_44485187_C_T||chr19:44484435:44497284:clu_19487:ENSG00000167384.10||CA-7733-6240-18366-18488-19088[INC][7/34]	CA-7733-6240-18366-18488-19088[INC][7/34]	chr19	44485187	44485036	44485157	7733	ZNF180	intron	30	0	0.192444	0.228239	0.228239
chr11_34895110_C_T	Brain_Amygdala||chr11_34895110_C_T||chr11:34890552:34916228:clu_4534:ENSG00000149089.12	Brain_Amygdala||chr11_34895110_C_T||chr11:34890552:34916228:clu_4534:ENSG00000149089.12||CA-51074-3184-24301-24402-28859[INC][90/7][UPT]	CA-51074-3184-24301-24402-28859[INC][90/7][UPT]	chr11	34895110	34895010	34895110	51074	APIP	exon	0	0	0.893999	-0.223925	0.223925
chr11_34895110_C_T	Brain_Anterior_cingulate_cortex_BA24||chr11_34895110_C_T||chr11:34890552:34916228:clu_4918:ENSG00000149089.12	Brain_Anterior_cingulate_cortex_BA24||chr11_34895110_C_T||chr11:34890552:34916228:clu_4918:ENSG00000149089.12||CA-51074-3184-24301-24402-28859[INC][90/7][UPT]	CA-51074-3184-24301-24402-28859[INC][90/7][UPT]	chr11	34895110	34895010	34895110	51074	APIP	exon	0	0	0.893999	-0.223925	0.223925
chr11_34895110_C_T	Brain_Caudate_basal_ganglia||chr11_34895110_C_T||chr11:34890552:34916228:clu_5566:ENSG00000149089.12	Brain_Caudate_basal_ganglia||chr11_34895110_C_T||chr11:34890552:34916228:clu_5566:ENSG00000149089.12||CA-51074-3184-24301-24402-28859[INC][90/7][UPT]	CA-51074-3184-24301-24402-28859[INC][90/7][UPT]	chr11	34895110	34895010	34895110	51074	APIP	exon	0	0	0.893999	-0.223925	0.223925
chr11_34895110_C_T	Brain_Cerebellar_Hemisphere||chr11_34895110_C_T||chr11:34890552:34916228:clu_5843:ENSG00000149089.12	Brain_Cerebellar_Hemisphere||chr11_34895110_C_T||chr11:34890552:34916228:clu_5843:ENSG00000149089.12||CA-51074-3184-24301-24402-28859[INC][90/7][UPT]	CA-51074-3184-24301-24402-28859[INC][90/7][UPT]	chr11	34895110	34895010	34895110	51074	APIP	exon	0	0	0.893999	-0.223925	0.223925
chr11_34895110_C_T	Brain_Cerebellum||chr11_34895110_C_T||chr11:34890552:34916228:clu_6120:ENSG00000149089.12	Brain_Cerebellum||chr11_34895110_C_T||chr11:34890552:34916228:clu_6120:ENSG00000149089.12||CA-51074-3184-24301-24402-28859[INC][90/7][UPT]	CA-51074-3184-24301-24402-28859[INC][90/7][UPT]	chr11	34895110	34895010	34895110	51074	APIP	exon	0	0	0.893999	-0.223925	0.223925
chr11_34895110_C_T	Brain_Cortex||chr11_34895110_C_T||chr11:34890552:34916228:clu_5766:ENSG00000149089.12	Brain_Cortex||chr11_34895110_C_T||chr11:34890552:34916228:clu_5766:ENSG00000149089.12||CA-51074-3184-24301-24402-28859[INC][90/7][UPT]	CA-51074-3184-24301-24402-28859[INC][90/7][UPT]	chr11	34895110	34895010	34895110	51074	APIP	exon	0	0	0.893999	-0.223925	0.223925
chr11_34895110_C_T	Brain_Frontal_Cortex_BA9||chr11_34895110_C_T||chr11:34890552:34916228:clu_5347:ENSG00000149089.12	Brain_Frontal_Cortex_BA9||chr11_34895110_C_T||chr11:34890552:34916228:clu_5347:ENSG00000149089.12||CA-51074-3184-24301-24402-28859[INC][90/7][UPT]	CA-51074-3184-24301-24402-28859[INC][90/7][UPT]	chr11	34895110	34895010	34895110	51074	APIP	exon	0	0	0.893999	-0.223925	0.223925
chr11_34895110_C_T	Brain_Hippocampus||chr11_34895110_C_T||chr11:34890552:34916228:clu_5055:ENSG00000149089.12	Brain_Hippocampus||chr11_34895110_C_T||chr11:34890552:34916228:clu_5055:ENSG00000149089.12||CA-51074-3184-24301-24402-28859[INC][90/7][UPT]	CA-51074-3184-24301-24402-28859[INC][90/7][UPT]	chr11	34895110	34895010	34895110	51074	APIP	exon	0	0	0.893999	-0.223925	0.223925
chr11_34895110_C_T	Brain_Hypothalamus||chr11_34895110_C_T||chr11:34890552:34916228:clu_5466:ENSG00000149089.12	Brain_Hypothalamus||chr11_34895110_C_T||chr11:34890552:34916228:clu_5466:ENSG00000149089.12||CA-51074-3184-24301-24402-28859[INC][90/7][UPT]	CA-51074-3184-24301-24402-28859[INC][90/7][UPT]	chr11	34895110	34895010	34895110	51074	APIP	exon	0	0	0.893999	-0.223925	0.223925
chr11_34895110_C_T	Brain_Putamen_basal_ganglia||chr11_34895110_C_T||chr11:34890552:34916228:clu_4907:ENSG00000149089.12	Brain_Putamen_basal_ganglia||chr11_34895110_C_T||chr11:34890552:34916228:clu_4907:ENSG00000149089.12||CA-51074-3184-24301-24402-28859[INC][90/7][UPT]	CA-51074-3184-24301-24402-28859[INC][90/7][UPT]	chr11	34895110	34895010	34895110	51074	APIP	exon	0	0	0.893999	-0.223925	0.223925
chr11_34895110_C_T	Brain_Spinal_cord_cervical_c-1||chr11_34895110_C_T||chr11:34890552:34916228:clu_4851:ENSG00000149089.12	Brain_Spinal_cord_cervical_c-1||chr11_34895110_C_T||chr11:34890552:34916228:clu_4851:ENSG00000149089.12||CA-51074-3184-24301-24402-28859[INC][90/7][UPT]	CA-51074-3184-24301-24402-28859[INC][90/7][UPT]	chr11	34895110	34895010	34895110	51074	APIP	exon	0	0	0.893999	-0.223925	0.223925
chr11_34895110_C_T	Brain_Substantia_nigra||chr11_34895110_C_T||chr11:34890552:34916228:clu_4365:ENSG00000149089.12	Brain_Substantia_nigra||chr11_34895110_C_T||chr11:34890552:34916228:clu_4365:ENSG00000149089.12||CA-51074-3184-24301-24402-28859[INC][90/7][UPT]	CA-51074-3184-24301-24402-28859[INC][90/7][UPT]	chr11	34895110	34895010	34895110	51074	APIP	exon	0	0	0.893999	-0.223925	0.223925
chr16_536144_T_C	Brain_Cerebellar_Hemisphere||chr16_536144_T_C||chr16:533998:540093:clu_13359:ENSG00000103326.11	Brain_Cerebellar_Hemisphere||chr16_536144_T_C||chr16:533998:540093:clu_13359:ENSG00000103326.11||CA-6650-9143-11173-11287-15237[INC][1/1]	CA-6650-9143-11173-11287-15237[INC][1/1]	chr16	536144	536029	536142	6650	SOLH	intron	2	1	0.259494	-0.215085	0.215085
chr16_536144_T_C	Brain_Cerebellum||chr16_536144_T_C||chr16:533998:540093:clu_13953:ENSG00000103326.11	Brain_Cerebellum||chr16_536144_T_C||chr16:533998:540093:clu_13953:ENSG00000103326.11||CA-6650-9143-11173-11287-15237[INC][1/1]	CA-6650-9143-11173-11287-15237[INC][1/1]	chr16	536144	536029	536142	6650	SOLH	intron	2	1	0.259494	-0.215085	0.215085
chr17_75725076_G_A	Brain_Caudate_basal_ganglia||chr17_75725076_G_A||chr17:75724782:75727195:clu_12204:ENSG00000132470.13	Brain_Caudate_basal_ganglia||chr17_75725076_G_A||chr17:75724782:75727195:clu_12204:ENSG00000132470.13||CA-3691-6455-6590-6746-8867[INC][1/51]	CA-3691-6455-6590-6746-8867[INC][1/51]	chr17	75725076	75724918	75725073	3691	ITGB4	intron	3	0	0.0514448	0.2132	0.2132
chr14_24291558_G_A	Brain_Amygdala||chr14_24291558_G_A||chr14:24291219:24292184:clu_13845:ENSG00000157379.13	Brain_Amygdala||chr14_24291558_G_A||chr14:24291219:24292184:clu_13845:ENSG00000157379.13||CA-115817-10650-11208-11278-11614[INC][51/2]	CA-115817-10650-11208-11278-11614[INC][51/2]	chr14	24291558	24291556	24291625	115817	DHRS1	exon	2	0	0.496911	-0.212208	0.212208
chr14_24291558_G_A	Brain_Anterior_cingulate_cortex_BA24||chr14_24291558_G_A||chr14:24291219:24292184:clu_14913:ENSG00000157379.13	Brain_Anterior_cingulate_cortex_BA24||chr14_24291558_G_A||chr14:24291219:24292184:clu_14913:ENSG00000157379.13||CA-115817-10650-11208-11278-11614[INC][51/2]	CA-115817-10650-11208-11278-11614[INC][51/2]	chr14	24291558	24291556	24291625	115817	DHRS1	exon	2	0	0.496911	-0.212208	0.212208
chr14_24291558_G_A	Brain_Caudate_basal_ganglia||chr14_24291558_G_A||chr14:24291219:24292184:clu_16896:ENSG00000157379.13	Brain_Caudate_basal_ganglia||chr14_24291558_G_A||chr14:24291219:24292184:clu_16896:ENSG00000157379.13||CA-115817-10650-11208-11278-11614[INC][51/2]	CA-115817-10650-11208-11278-11614[INC][51/2]	chr14	24291558	24291556	24291625	115817	DHRS1	exon	2	0	0.496911	-0.212208	0.212208
chr14_24291558_G_A	Brain_Cerebellar_Hemisphere||chr14_24291558_G_A||chr14:24291219:24292184:clu_17908:ENSG00000157379.13	Brain_Cerebellar_Hemisphere||chr14_24291558_G_A||chr14:24291219:24292184:clu_17908:ENSG00000157379.13||CA-115817-10650-11208-11278-11614[INC][51/2]	CA-115817-10650-11208-11278-11614[INC][51/2]	chr14	24291558	24291556	24291625	115817	DHRS1	exon	2	0	0.496911	-0.212208	0.212208
chr14_24291558_G_A	Brain_Cerebellum||chr14_24291558_G_A||chr14:24291219:24292184:clu_18750:ENSG00000157379.13	Brain_Cerebellum||chr14_24291558_G_A||chr14:24291219:24292184:clu_18750:ENSG00000157379.13||CA-115817-10650-11208-11278-11614[INC][51/2]	CA-115817-10650-11208-11278-11614[INC][51/2]	chr14	24291558	24291556	24291625	115817	DHRS1	exon	2	0	0.496911	-0.212208	0.212208
chr14_24291558_G_A	Brain_Cortex||chr14_24291558_G_A||chr14:24291219:24292184:clu_17420:ENSG00000157379.13	Brain_Cortex||chr14_24291558_G_A||chr14:24291219:24292184:clu_17420:ENSG00000157379.13||CA-115817-10650-11208-11278-11614[INC][51/2]	CA-115817-10650-11208-11278-11614[INC][51/2]	chr14	24291558	24291556	24291625	115817	DHRS1	exon	2	0	0.496911	-0.212208	0.212208
chr14_24291558_G_A	Brain_Frontal_Cortex_BA9||chr14_24291558_G_A||chr14:24291219:24292184:clu_16117:ENSG00000157379.13	Brain_Frontal_Cortex_BA9||chr14_24291558_G_A||chr14:24291219:24292184:clu_16117:ENSG00000157379.13||CA-115817-10650-11208-11278-11614[INC][51/2]	CA-115817-10650-11208-11278-11614[INC][51/2]	chr14	24291558	24291556	24291625	115817	DHRS1	exon	2	0	0.496911	-0.212208	0.212208
chr14_24291558_G_A	Brain_Hippocampus||chr14_24291558_G_A||chr14:24291219:24292184:clu_15392:ENSG00000157379.13	Brain_Hippocampus||chr14_24291558_G_A||chr14:24291219:24292184:clu_15392:ENSG00000157379.13||CA-115817-10650-11208-11278-11614[INC][51/2]	CA-115817-10650-11208-11278-11614[INC][51/2]	chr14	24291558	24291556	24291625	115817	DHRS1	exon	2	0	0.496911	-0.212208	0.212208
chr14_24291558_G_A	Brain_Hypothalamus||chr14_24291558_G_A||chr14:24291219:24292184:clu_16493:ENSG00000157379.13	Brain_Hypothalamus||chr14_24291558_G_A||chr14:24291219:24292184:clu_16493:ENSG00000157379.13||CA-115817-10650-11208-11278-11614[INC][51/2]	CA-115817-10650-11208-11278-11614[INC][51/2]	chr14	24291558	24291556	24291625	115817	DHRS1	exon	2	0	0.496911	-0.212208	0.212208
chr14_24291558_G_A	Brain_Nucleus_accumbens_basal_ganglia||chr14_24291558_G_A||chr14:24291219:24292184:clu_17262:ENSG00000157379.13	Brain_Nucleus_accumbens_basal_ganglia||chr14_24291558_G_A||chr14:24291219:24292184:clu_17262:ENSG00000157379.13||CA-115817-10650-11208-11278-11614[INC][51/2]	CA-115817-10650-11208-11278-11614[INC][51/2]	chr14	24291558	24291556	24291625	115817	DHRS1	exon	2	0	0.496911	-0.212208	0.212208
chr14_24291558_G_A	Brain_Putamen_basal_ganglia||chr14_24291558_G_A||chr14:24291219:24292184:clu_15104:ENSG00000157379.13	Brain_Putamen_basal_ganglia||chr14_24291558_G_A||chr14:24291219:24292184:clu_15104:ENSG00000157379.13||CA-115817-10650-11208-11278-11614[INC][51/2]	CA-115817-10650-11208-11278-11614[INC][51/2]	chr14	24291558	24291556	24291625	115817	DHRS1	exon	2	0	0.496911	-0.212208	0.212208
chr14_24291558_G_A	Brain_Spinal_cord_cervical_c-1||chr14_24291558_G_A||chr14:24291219:24292184:clu_14789:ENSG00000157379.13	Brain_Spinal_cord_cervical_c-1||chr14_24291558_G_A||chr14:24291219:24292184:clu_14789:ENSG00000157379.13||CA-115817-10650-11208-11278-11614[INC][51/2]	CA-115817-10650-11208-11278-11614[INC][51/2]	chr14	24291558	24291556	24291625	115817	DHRS1	exon	2	0	0.496911	-0.212208	0.212208
chr14_24291558_G_A	Brain_Substantia_nigra||chr14_24291558_G_A||chr14:24291219:24292184:clu_13307:ENSG00000157379.13	Brain_Substantia_nigra||chr14_24291558_G_A||chr14:24291219:24292184:clu_13307:ENSG00000157379.13||CA-115817-10650-11208-11278-11614[INC][51/2]	CA-115817-10650-11208-11278-11614[INC][51/2]	chr14	24291558	24291556	24291625	115817	DHRS1	exon	2	0	0.496911	-0.212208	0.212208
chr3_11844891_T_C	Brain_Amygdala||chr3_11844891_T_C||chr3:11844211:11846502:clu_27630:ENSG00000144559.10	Brain_Amygdala||chr3_11844891_T_C||chr3:11844211:11846502:clu_27630:ENSG00000144559.10||CA-132001@0-3418-4823-5029-5708[INC][6/60][UPT]	CA-132001@0-3418-4823-5029-5708[INC][6/60][UPT]	chr3	11844891	11844891	11845096	132001	TAMM41	exon	0	0	0.13233	0.206844	0.206844
chr3_11844891_T_C	Brain_Anterior_cingulate_cortex_BA24||chr3_11844891_T_C||chr3:11844211:11846502:clu_29781:ENSG00000144559.10	Brain_Anterior_cingulate_cortex_BA24||chr3_11844891_T_C||chr3:11844211:11846502:clu_29781:ENSG00000144559.10||CA-132001@0-3418-4823-5029-5708[INC][6/60][UPT]	CA-132001@0-3418-4823-5029-5708[INC][6/60][UPT]	chr3	11844891	11844891	11845096	132001	TAMM41	exon	0	0	0.13233	0.206844	0.206844
chr3_11844891_T_C	Brain_Caudate_basal_ganglia||chr3_11844891_T_C||chr3:11844211:11846502:clu_33766:ENSG00000144559.10	Brain_Caudate_basal_ganglia||chr3_11844891_T_C||chr3:11844211:11846502:clu_33766:ENSG00000144559.10||CA-132001@0-3418-4823-5029-5708[INC][6/60][UPT]	CA-132001@0-3418-4823-5029-5708[INC][6/60][UPT]	chr3	11844891	11844891	11845096	132001	TAMM41	exon	0	0	0.13233	0.206844	0.206844
chr3_11844891_T_C	Brain_Cerebellar_Hemisphere||chr3_11844891_T_C||chr3:11844211:11846502:clu_35384:ENSG00000144559.10	Brain_Cerebellar_Hemisphere||chr3_11844891_T_C||chr3:11844211:11846502:clu_35384:ENSG00000144559.10||CA-132001@0-3418-4823-5029-5708[INC][6/60][UPT]	CA-132001@0-3418-4823-5029-5708[INC][6/60][UPT]	chr3	11844891	11844891	11845096	132001	TAMM41	exon	0	0	0.13233	0.206844	0.206844
chr3_11844891_T_C	Brain_Cortex||chr3_11844891_T_C||chr3:11844211:11846502:clu_34735:ENSG00000144559.10	Brain_Cortex||chr3_11844891_T_C||chr3:11844211:11846502:clu_34735:ENSG00000144559.10||CA-132001@0-3418-4823-5029-5708[INC][6/60][UPT]	CA-132001@0-3418-4823-5029-5708[INC][6/60][UPT]	chr3	11844891	11844891	11845096	132001	TAMM41	exon	0	0	0.13233	0.206844	0.206844
chr3_11844891_T_C	Brain_Frontal_Cortex_BA9||chr3_11844891_T_C||chr3:11844211:11846502:clu_32297:ENSG00000144559.10	Brain_Frontal_Cortex_BA9||chr3_11844891_T_C||chr3:11844211:11846502:clu_32297:ENSG00000144559.10||CA-132001@0-3418-4823-5029-5708[INC][6/60][UPT]	CA-132001@0-3418-4823-5029-5708[INC][6/60][UPT]	chr3	11844891	11844891	11845096	132001	TAMM41	exon	0	0	0.13233	0.206844	0.206844
chr3_11844891_T_C	Brain_Hippocampus||chr3_11844891_T_C||chr3:11844211:11846502:clu_30687:ENSG00000144559.10	Brain_Hippocampus||chr3_11844891_T_C||chr3:11844211:11846502:clu_30687:ENSG00000144559.10||CA-132001@0-3418-4823-5029-5708[INC][6/60][UPT]	CA-132001@0-3418-4823-5029-5708[INC][6/60][UPT]	chr3	11844891	11844891	11845096	132001	TAMM41	exon	0	0	0.13233	0.206844	0.206844
chr3_11844891_T_C	Brain_Nucleus_accumbens_basal_ganglia||chr3_11844891_T_C||chr3:11844211:11846502:clu_34580:ENSG00000144559.10	Brain_Nucleus_accumbens_basal_ganglia||chr3_11844891_T_C||chr3:11844211:11846502:clu_34580:ENSG00000144559.10||CA-132001@0-3418-4823-5029-5708[INC][6/60][UPT]	CA-132001@0-3418-4823-5029-5708[INC][6/60][UPT]	chr3	11844891	11844891	11845096	132001	TAMM41	exon	0	0	0.13233	0.206844	0.206844
chr3_11844891_T_C	Brain_Putamen_basal_ganglia||chr3_11844891_T_C||chr3:11844211:11846502:clu_30140:ENSG00000144559.10	Brain_Putamen_basal_ganglia||chr3_11844891_T_C||chr3:11844211:11846502:clu_30140:ENSG00000144559.10||CA-132001@0-3418-4823-5029-5708[INC][6/60][UPT]	CA-132001@0-3418-4823-5029-5708[INC][6/60][UPT]	chr3	11844891	11844891	11845096	132001	TAMM41	exon	0	0	0.13233	0.206844	0.206844
chr3_11844891_T_C	Brain_Spinal_cord_cervical_c-1||chr3_11844891_T_C||chr3:11844211:11846502:clu_29442:ENSG00000144559.10	Brain_Spinal_cord_cervical_c-1||chr3_11844891_T_C||chr3:11844211:11846502:clu_29442:ENSG00000144559.10||CA-132001@0-3418-4823-5029-5708[INC][6/60][UPT]	CA-132001@0-3418-4823-5029-5708[INC][6/60][UPT]	chr3	11844891	11844891	11845096	132001	TAMM41	exon	0	0	0.13233	0.206844	0.206844
chr3_141234211_A_T	Brain_Amygdala||chr3_141234211_A_T||chr3:141231911:141260123:clu_29202:ENSG00000155893.12	Brain_Amygdala||chr3_141234211_A_T||chr3:141231911:141260123:clu_29202:ENSG00000155893.12||CA-92370-3087-5391-5494-31298[INC][1/58][UPT]	CA-92370-3087-5391-5494-31298[INC][1/58][UPT]	chr3	141234211	141234216	141234318	92370	ACPL2	intron	5	0	0.0470862	0.205438	0.205438
chr3_141234211_A_T	Brain_Anterior_cingulate_cortex_BA24||chr3_141234211_A_T||chr3:141231911:141260123:clu_31529:ENSG00000155893.12	Brain_Anterior_cingulate_cortex_BA24||chr3_141234211_A_T||chr3:141231911:141260123:clu_31529:ENSG00000155893.12||CA-92370-3087-5391-5494-31298[INC][1/58][UPT]	CA-92370-3087-5391-5494-31298[INC][1/58][UPT]	chr3	141234211	141234216	141234318	92370	ACPL2	intron	5	0	0.0470862	0.205438	0.205438
chr3_141234211_A_T	Brain_Caudate_basal_ganglia||chr3_141234211_A_T||chr3:141231911:141260123:clu_35721:ENSG00000155893.12	Brain_Caudate_basal_ganglia||chr3_141234211_A_T||chr3:141231911:141260123:clu_35721:ENSG00000155893.12||CA-92370-3087-5391-5494-31298[INC][1/58][UPT]	CA-92370-3087-5391-5494-31298[INC][1/58][UPT]	chr3	141234211	141234216	141234318	92370	ACPL2	intron	5	0	0.0470862	0.205438	0.205438
chr3_141234211_A_T	Brain_Cerebellar_Hemisphere||chr3_141234211_A_T||chr3:141231911:141260123:clu_37356:ENSG00000155893.12	Brain_Cerebellar_Hemisphere||chr3_141234211_A_T||chr3:141231911:141260123:clu_37356:ENSG00000155893.12||CA-92370-3087-5391-5494-31298[INC][1/58][UPT]	CA-92370-3087-5391-5494-31298[INC][1/58][UPT]	chr3	141234211	141234216	141234318	92370	ACPL2	intron	5	0	0.0470862	0.205438	0.205438
chr3_141234211_A_T	Brain_Cerebellum||chr3_141234211_A_T||chr3:141231911:141260123:clu_39222:ENSG00000155893.12	Brain_Cerebellum||chr3_141234211_A_T||chr3:141231911:141260123:clu_39222:ENSG00000155893.12||CA-92370-3087-5391-5494-31298[INC][1/58][UPT]	CA-92370-3087-5391-5494-31298[INC][1/58][UPT]	chr3	141234211	141234216	141234318	92370	ACPL2	intron	5	0	0.0470862	0.205438	0.205438
chr3_141234211_A_T	Brain_Cortex||chr3_141234211_A_T||chr3:141231911:141260123:clu_36740:ENSG00000155893.12	Brain_Cortex||chr3_141234211_A_T||chr3:141231911:141260123:clu_36740:ENSG00000155893.12||CA-92370-3087-5391-5494-31298[INC][1/58][UPT]	CA-92370-3087-5391-5494-31298[INC][1/58][UPT]	chr3	141234211	141234216	141234318	92370	ACPL2	intron	5	0	0.0470862	0.205438	0.205438
chr3_141234211_A_T	Brain_Frontal_Cortex_BA9||chr3_141234211_A_T||chr3:141231911:141260123:clu_34194:ENSG00000155893.12	Brain_Frontal_Cortex_BA9||chr3_141234211_A_T||chr3:141231911:141260123:clu_34194:ENSG00000155893.12||CA-92370-3087-5391-5494-31298[INC][1/58][UPT]	CA-92370-3087-5391-5494-31298[INC][1/58][UPT]	chr3	141234211	141234216	141234318	92370	ACPL2	intron	5	0	0.0470862	0.205438	0.205438
chr3_141234211_A_T	Brain_Hippocampus||chr3_141234211_A_T||chr3:141231911:141260123:clu_32462:ENSG00000155893.12	Brain_Hippocampus||chr3_141234211_A_T||chr3:141231911:141260123:clu_32462:ENSG00000155893.12||CA-92370-3087-5391-5494-31298[INC][1/58][UPT]	CA-92370-3087-5391-5494-31298[INC][1/58][UPT]	chr3	141234211	141234216	141234318	92370	ACPL2	intron	5	0	0.0470862	0.205438	0.205438
chr3_141234211_A_T	Brain_Hypothalamus||chr3_141234211_A_T||chr3:141231911:141260123:clu_34858:ENSG00000155893.12	Brain_Hypothalamus||chr3_141234211_A_T||chr3:141231911:141260123:clu_34858:ENSG00000155893.12||CA-92370-3087-5391-5494-31298[INC][1/58][UPT]	CA-92370-3087-5391-5494-31298[INC][1/58][UPT]	chr3	141234211	141234216	141234318	92370	ACPL2	intron	5	0	0.0470862	0.205438	0.205438
chr3_141234211_A_T	Brain_Nucleus_accumbens_basal_ganglia||chr3_141234211_A_T||chr3:141231911:141260123:clu_36562:ENSG00000155893.12	Brain_Nucleus_accumbens_basal_ganglia||chr3_141234211_A_T||chr3:141231911:141260123:clu_36562:ENSG00000155893.12||CA-92370-3087-5391-5494-31298[INC][1/58][UPT]	CA-92370-3087-5391-5494-31298[INC][1/58][UPT]	chr3	141234211	141234216	141234318	92370	ACPL2	intron	5	0	0.0470862	0.205438	0.205438
chr3_141234211_A_T	Brain_Putamen_basal_ganglia||chr3_141234211_A_T||chr3:141231911:141260123:clu_31877:ENSG00000155893.12	Brain_Putamen_basal_ganglia||chr3_141234211_A_T||chr3:141231911:141260123:clu_31877:ENSG00000155893.12||CA-92370-3087-5391-5494-31298[INC][1/58][UPT]	CA-92370-3087-5391-5494-31298[INC][1/58][UPT]	chr3	141234211	141234216	141234318	92370	ACPL2	intron	5	0	0.0470862	0.205438	0.205438
chr3_141234211_A_T	Brain_Spinal_cord_cervical_c-1||chr3_141234211_A_T||chr3:141231911:141260123:clu_31106:ENSG00000155893.12	Brain_Spinal_cord_cervical_c-1||chr3_141234211_A_T||chr3:141231911:141260123:clu_31106:ENSG00000155893.12||CA-92370-3087-5391-5494-31298[INC][1/58][UPT]	CA-92370-3087-5391-5494-31298[INC][1/58][UPT]	chr3	141234211	141234216	141234318	92370	ACPL2	intron	5	0	0.0470862	0.205438	0.205438
chr3_141234211_A_T	Brain_Substantia_nigra||chr3_141234211_A_T||chr3:141231911:141260123:clu_28026:ENSG00000155893.12	Brain_Substantia_nigra||chr3_141234211_A_T||chr3:141231911:141260123:clu_28026:ENSG00000155893.12||CA-92370-3087-5391-5494-31298[INC][1/58][UPT]	CA-92370-3087-5391-5494-31298[INC][1/58][UPT]	chr3	141234211	141234216	141234318	92370	ACPL2	intron	5	0	0.0470862	0.205438	0.205438
chr1_37559502_T_C	Brain_Anterior_cingulate_cortex_BA24||chr1_37559502_T_C||chr1:37557748:37561557:clu_36330:ENSG00000163879.10	Brain_Anterior_cingulate_cortex_BA24||chr1_37559502_T_C||chr1:37557748:37561557:clu_36330:ENSG00000163879.10||CA-7802-3830-5408-5578-7638[INC][60/8]	CA-7802-3830-5408-5578-7638[INC][60/8]	chr1	37559502	37559327	37559496	7802	DNALI1	intron	6	0	0.744864	-0.168551	0.168551
chr1_37559502_T_C	Brain_Caudate_basal_ganglia||chr1_37559502_T_C||chr1:37557748:37561557:clu_41179:ENSG00000163879.10	Brain_Caudate_basal_ganglia||chr1_37559502_T_C||chr1:37557748:37561557:clu_41179:ENSG00000163879.10||CA-7802-3830-5408-5578-7638[INC][60/8]	CA-7802-3830-5408-5578-7638[INC][60/8]	chr1	37559502	37559327	37559496	7802	DNALI1	intron	6	0	0.744864	-0.168551	0.168551
chr1_37559502_T_C	Brain_Cortex||chr1_37559502_T_C||chr1:37557748:37561557:clu_42326:ENSG00000163879.10	Brain_Cortex||chr1_37559502_T_C||chr1:37557748:37561557:clu_42326:ENSG00000163879.10||CA-7802-3830-5408-5578-7638[INC][60/8]	CA-7802-3830-5408-5578-7638[INC][60/8]	chr1	37559502	37559327	37559496	7802	DNALI1	intron	6	0	0.744864	-0.168551	0.168551
chr1_37559502_T_C	Brain_Frontal_Cortex_BA9||chr1_37559502_T_C||chr1:37557748:37561557:clu_39374:ENSG00000163879.10	Brain_Frontal_Cortex_BA9||chr1_37559502_T_C||chr1:37557748:37561557:clu_39374:ENSG00000163879.10||CA-7802-3830-5408-5578-7638[INC][60/8]	CA-7802-3830-5408-5578-7638[INC][60/8]	chr1	37559502	37559327	37559496	7802	DNALI1	intron	6	0	0.744864	-0.168551	0.168551
chr1_37559502_T_C	Brain_Hippocampus||chr1_37559502_T_C||chr1:37557748:37561557:clu_37424:ENSG00000163879.10	Brain_Hippocampus||chr1_37559502_T_C||chr1:37557748:37561557:clu_37424:ENSG00000163879.10||CA-7802-3830-5408-5578-7638[INC][60/8]	CA-7802-3830-5408-5578-7638[INC][60/8]	chr1	37559502	37559327	37559496	7802	DNALI1	intron	6	0	0.744864	-0.168551	0.168551
chr1_37559502_T_C	Brain_Hypothalamus||chr1_37559502_T_C||chr1:37557748:37561557:clu_40168:ENSG00000163879.10	Brain_Hypothalamus||chr1_37559502_T_C||chr1:37557748:37561557:clu_40168:ENSG00000163879.10||CA-7802-3830-5408-5578-7638[INC][60/8]	CA-7802-3830-5408-5578-7638[INC][60/8]	chr1	37559502	37559327	37559496	7802	DNALI1	intron	6	0	0.744864	-0.168551	0.168551
chr1_37559502_T_C	Brain_Nucleus_accumbens_basal_ganglia||chr1_37559502_T_C||chr1:37557748:37561557:clu_42171:ENSG00000163879.10	Brain_Nucleus_accumbens_basal_ganglia||chr1_37559502_T_C||chr1:37557748:37561557:clu_42171:ENSG00000163879.10||CA-7802-3830-5408-5578-7638[INC][60/8]	CA-7802-3830-5408-5578-7638[INC][60/8]	chr1	37559502	37559327	37559496	7802	DNALI1	intron	6	0	0.744864	-0.168551	0.168551
chr1_37559502_T_C	Brain_Putamen_basal_ganglia||chr1_37559502_T_C||chr1:37557748:37561557:clu_36724:ENSG00000163879.10	Brain_Putamen_basal_ganglia||chr1_37559502_T_C||chr1:37557748:37561557:clu_36724:ENSG00000163879.10||CA-7802-3830-5408-5578-7638[INC][60/8]	CA-7802-3830-5408-5578-7638[INC][60/8]	chr1	37559502	37559327	37559496	7802	DNALI1	intron	6	0	0.744864	-0.168551	0.168551
chr1_37559502_T_C	Brain_Spinal_cord_cervical_c-1||chr1_37559502_T_C||chr1:37557748:37561557:clu_35781:ENSG00000163879.10	Brain_Spinal_cord_cervical_c-1||chr1_37559502_T_C||chr1:37557748:37561557:clu_35781:ENSG00000163879.10||CA-7802-3830-5408-5578-7638[INC][60/8]	CA-7802-3830-5408-5578-7638[INC][60/8]	chr1	37559502	37559327	37559496	7802	DNALI1	intron	6	0	0.744864	-0.168551	0.168551
chr1_37559502_T_C	Brain_Substantia_nigra||chr1_37559502_T_C||chr1:37557748:37561557:clu_32214:ENSG00000163879.10	Brain_Substantia_nigra||chr1_37559502_T_C||chr1:37557748:37561557:clu_32214:ENSG00000163879.10||CA-7802-3830-5408-5578-7638[INC][60/8]	CA-7802-3830-5408-5578-7638[INC][60/8]	chr1	37559502	37559327	37559496	7802	DNALI1	intron	6	0	0.744864	-0.168551	0.168551
chr19_43990063_T_C	Brain_Cerebellar_Hemisphere||chr19_43990063_T_C||chr19:43988558:43991548:clu_21609:ENSG00000204920.10	Brain_Cerebellar_Hemisphere||chr19_43990063_T_C||chr19:43988558:43991548:clu_21609:ENSG00000204920.10||CA-7711-7389-8854-8943-10378[INC][8/42]	CA-7711-7389-8854-8943-10378[INC][8/42]	chr19	43990063	43990024	43990112	7711	ZNF155	exon	39	0	0.213864	0.142409	0.142409
chr19_43990063_T_C	Brain_Cerebellum||chr19_43990063_T_C||chr19:43988558:43991548:clu_22608:ENSG00000204920.10	Brain_Cerebellum||chr19_43990063_T_C||chr19:43988558:43991548:clu_22608:ENSG00000204920.10||CA-7711-7389-8854-8943-10378[INC][8/42]	CA-7711-7389-8854-8943-10378[INC][8/42]	chr19	43990063	43990024	43990112	7711	ZNF155	exon	39	0	0.213864	0.142409	0.142409
chr19_43990063_T_C	Brain_Cortex||chr19_43990063_T_C||chr19:43988558:43991548:clu_20985:ENSG00000204920.10	Brain_Cortex||chr19_43990063_T_C||chr19:43988558:43991548:clu_20985:ENSG00000204920.10||CA-7711-7389-8854-8943-10378[INC][8/42]	CA-7711-7389-8854-8943-10378[INC][8/42]	chr19	43990063	43990024	43990112	7711	ZNF155	exon	39	0	0.213864	0.142409	0.142409
chr19_43990063_T_C	Brain_Frontal_Cortex_BA9||chr19_43990063_T_C||chr19:43988558:43991548:clu_19460:ENSG00000204920.10	Brain_Frontal_Cortex_BA9||chr19_43990063_T_C||chr19:43988558:43991548:clu_19460:ENSG00000204920.10||CA-7711-7389-8854-8943-10378[INC][8/42]	CA-7711-7389-8854-8943-10378[INC][8/42]	chr19	43990063	43990024	43990112	7711	ZNF155	exon	39	0	0.213864	0.142409	0.142409
chr1_46309111_A_G	Brain_Amygdala||chr1_46309111_A_G||chr1:46303820:46310155:clu_33957:ENSG00000173660.11	Brain_Amygdala||chr1_46309111_A_G||chr1:46303820:46310155:clu_33957:ENSG00000173660.11||CA-7388-3208-8488-8515-9542[INC][483/13][UPT]	CA-7388-3208-8488-8515-9542[INC][483/13][UPT]	chr1	46309111	46309101	46309127	7388	UQCRH	exon	10	0	0.96497	-0.142243	0.142243
chr1_46309111_A_G	Brain_Anterior_cingulate_cortex_BA24||chr1_46309111_A_G||chr1:46303820:46310155:clu_36673:ENSG00000173660.11	Brain_Anterior_cingulate_cortex_BA24||chr1_46309111_A_G||chr1:46303820:46310155:clu_36673:ENSG00000173660.11||CA-7388-3208-8488-8515-9542[INC][483/13][UPT]	CA-7388-3208-8488-8515-9542[INC][483/13][UPT]	chr1	46309111	46309101	46309127	7388	UQCRH	exon	10	0	0.96497	-0.142243	0.142243
chr1_46309111_A_G	Brain_Caudate_basal_ganglia||chr1_46309111_A_G||chr1:46303820:46310155:clu_41561:ENSG00000173660.11	Brain_Caudate_basal_ganglia||chr1_46309111_A_G||chr1:46303820:46310155:clu_41561:ENSG00000173660.11||CA-7388-3208-8488-8515-9542[INC][483/13][UPT]	CA-7388-3208-8488-8515-9542[INC][483/13][UPT]	chr1	46309111	46309101	46309127	7388	UQCRH	exon	10	0	0.96497	-0.142243	0.142243
chr1_46309111_A_G	Brain_Cerebellar_Hemisphere||chr1_46309111_A_G||chr1:46303820:46310155:clu_43341:ENSG00000173660.11	Brain_Cerebellar_Hemisphere||chr1_46309111_A_G||chr1:46303820:46310155:clu_43341:ENSG00000173660.11||CA-7388-3208-8488-8515-9542[INC][483/13][UPT]	CA-7388-3208-8488-8515-9542[INC][483/13][UPT]	chr1	46309111	46309101	46309127	7388	UQCRH	exon	10	0	0.96497	-0.142243	0.142243
chr1_46309111_A_G	Brain_Cerebellum||chr1_46309111_A_G||chr1:46303820:46310155:clu_45584:ENSG00000173660.11	Brain_Cerebellum||chr1_46309111_A_G||chr1:46303820:46310155:clu_45584:ENSG00000173660.11||CA-7388-3208-8488-8515-9542[INC][483/13][UPT]	CA-7388-3208-8488-8515-9542[INC][483/13][UPT]	chr1	46309111	46309101	46309127	7388	UQCRH	exon	10	0	0.96497	-0.142243	0.142243
chr1_46309111_A_G	Brain_Cortex||chr1_46309111_A_G||chr1:46303820:46310155:clu_42717:ENSG00000173660.11	Brain_Cortex||chr1_46309111_A_G||chr1:46303820:46310155:clu_42717:ENSG00000173660.11||CA-7388-3208-8488-8515-9542[INC][483/13][UPT]	CA-7388-3208-8488-8515-9542[INC][483/13][UPT]	chr1	46309111	46309101	46309127	7388	UQCRH	exon	10	0	0.96497	-0.142243	0.142243
chr1_46309111_A_G	Brain_Frontal_Cortex_BA9||chr1_46309111_A_G||chr1:46303820:46310155:clu_39737:ENSG00000173660.11	Brain_Frontal_Cortex_BA9||chr1_46309111_A_G||chr1:46303820:46310155:clu_39737:ENSG00000173660.11||CA-7388-3208-8488-8515-9542[INC][483/13][UPT]	CA-7388-3208-8488-8515-9542[INC][483/13][UPT]	chr1	46309111	46309101	46309127	7388	UQCRH	exon	10	0	0.96497	-0.142243	0.142243
chr1_46309111_A_G	Brain_Hippocampus||chr1_46309111_A_G||chr1:46303820:46310155:clu_37774:ENSG00000173660.11	Brain_Hippocampus||chr1_46309111_A_G||chr1:46303820:46310155:clu_37774:ENSG00000173660.11||CA-7388-3208-8488-8515-9542[INC][483/13][UPT]	CA-7388-3208-8488-8515-9542[INC][483/13][UPT]	chr1	46309111	46309101	46309127	7388	UQCRH	exon	10	0	0.96497	-0.142243	0.142243
chr1_46309111_A_G	Brain_Hypothalamus||chr1_46309111_A_G||chr1:46303820:46310155:clu_40545:ENSG00000173660.11	Brain_Hypothalamus||chr1_46309111_A_G||chr1:46303820:46310155:clu_40545:ENSG00000173660.11||CA-7388-3208-8488-8515-9542[INC][483/13][UPT]	CA-7388-3208-8488-8515-9542[INC][483/13][UPT]	chr1	46309111	46309101	46309127	7388	UQCRH	exon	10	0	0.96497	-0.142243	0.142243
chr1_46309111_A_G	Brain_Nucleus_accumbens_basal_ganglia||chr1_46309111_A_G||chr1:46303820:46310155:clu_42555:ENSG00000173660.11	Brain_Nucleus_accumbens_basal_ganglia||chr1_46309111_A_G||chr1:46303820:46310155:clu_42555:ENSG00000173660.11||CA-7388-3208-8488-8515-9542[INC][483/13][UPT]	CA-7388-3208-8488-8515-9542[INC][483/13][UPT]	chr1	46309111	46309101	46309127	7388	UQCRH	exon	10	0	0.96497	-0.142243	0.142243
chr1_46309111_A_G	Brain_Putamen_basal_ganglia||chr1_46309111_A_G||chr1:46303820:46310155:clu_37063:ENSG00000173660.11	Brain_Putamen_basal_ganglia||chr1_46309111_A_G||chr1:46303820:46310155:clu_37063:ENSG00000173660.11||CA-7388-3208-8488-8515-9542[INC][483/13][UPT]	CA-7388-3208-8488-8515-9542[INC][483/13][UPT]	chr1	46309111	46309101	46309127	7388	UQCRH	exon	10	0	0.96497	-0.142243	0.142243
chr1_46309111_A_G	Brain_Spinal_cord_cervical_c-1||chr1_46309111_A_G||chr1:46303820:46310155:clu_36117:ENSG00000173660.11	Brain_Spinal_cord_cervical_c-1||chr1_46309111_A_G||chr1:46303820:46310155:clu_36117:ENSG00000173660.11||CA-7388-3208-8488-8515-9542[INC][483/13][UPT]	CA-7388-3208-8488-8515-9542[INC][483/13][UPT]	chr1	46309111	46309101	46309127	7388	UQCRH	exon	10	0	0.96497	-0.142243	0.142243
chr1_46309111_A_G	Brain_Substantia_nigra||chr1_46309111_A_G||chr1:46303820:46310155:clu_32519:ENSG00000173660.11	Brain_Substantia_nigra||chr1_46309111_A_G||chr1:46303820:46310155:clu_32519:ENSG00000173660.11||CA-7388-3208-8488-8515-9542[INC][483/13][UPT]	CA-7388-3208-8488-8515-9542[INC][483/13][UPT]	chr1	46309111	46309101	46309127	7388	UQCRH	exon	10	0	0.96497	-0.142243	0.142243
chr3_171107201_G_A	Brain_Putamen_basal_ganglia||chr3_171107201_G_A||chr3:171101633:171108065:clu_32114:ENSG00000154310.16	Brain_Putamen_basal_ganglia||chr3_171107201_G_A||chr3:171101633:171108065:clu_32114:ENSG00000154310.16||CA-23043-355344-356202-356226-361775[INC][13/12]	CA-23043-355344-356202-356226-361775[INC][13/12]	chr3	171107201	171107183	171107206	23043	TNIK	exon	5	0	0.820906	-0.136179	0.136179
chr8_28183195_G_A	Brain_Amygdala||chr8_28183195_G_A||chr8:28162078:28189649:clu_38503:ENSG00000134014.16	Brain_Amygdala||chr8_28183195_G_A||chr8:28162078:28189649:clu_38503:ENSG00000134014.16||CA-55140-74848-95963-96034-102418[INC][3/75][DNT]	CA-55140-74848-95963-96034-102418[INC][3/75][DNT]	chr8	28183195	28183194	28183264	55140	ELP3	exon	1	0	0.0513941	0.136033	0.136033
chr8_28183195_G_A	Brain_Anterior_cingulate_cortex_BA24||chr8_28183195_G_A||chr8:28162078:28189649:clu_41555:ENSG00000134014.16	Brain_Anterior_cingulate_cortex_BA24||chr8_28183195_G_A||chr8:28162078:28189649:clu_41555:ENSG00000134014.16||CA-55140-74848-95963-96034-102418[INC][3/75][DNT]	CA-55140-74848-95963-96034-102418[INC][3/75][DNT]	chr8	28183195	28183194	28183264	55140	ELP3	exon	1	0	0.0513941	0.136033	0.136033
chr8_28183195_G_A	Brain_Caudate_basal_ganglia||chr8_28183195_G_A||chr8:28162078:28189649:clu_47130:ENSG00000134014.16	Brain_Caudate_basal_ganglia||chr8_28183195_G_A||chr8:28162078:28189649:clu_47130:ENSG00000134014.16||CA-55140-74848-95963-96034-102418[INC][3/75][DNT]	CA-55140-74848-95963-96034-102418[INC][3/75][DNT]	chr8	28183195	28183194	28183264	55140	ELP3	exon	1	0	0.0513941	0.136033	0.136033
chr8_28183195_G_A	Brain_Cerebellar_Hemisphere||chr8_28183195_G_A||chr8:28162078:28189649:clu_49316:ENSG00000134014.16	Brain_Cerebellar_Hemisphere||chr8_28183195_G_A||chr8:28162078:28189649:clu_49316:ENSG00000134014.16||CA-55140-74848-95963-96034-102418[INC][3/75][DNT]	CA-55140-74848-95963-96034-102418[INC][3/75][DNT]	chr8	28183195	28183194	28183264	55140	ELP3	exon	1	0	0.0513941	0.136033	0.136033
chr8_28183195_G_A	Brain_Cerebellum||chr8_28183195_G_A||chr8:28162078:28189649:clu_51861:ENSG00000134014.16	Brain_Cerebellum||chr8_28183195_G_A||chr8:28162078:28189649:clu_51861:ENSG00000134014.16||CA-55140-74848-95963-96034-102418[INC][3/75][DNT]	CA-55140-74848-95963-96034-102418[INC][3/75][DNT]	chr8	28183195	28183194	28183264	55140	ELP3	exon	1	0	0.0513941	0.136033	0.136033
chr8_28183195_G_A	Brain_Cortex||chr8_28183195_G_A||chr8:28162078:28189649:clu_48481:ENSG00000134014.16	Brain_Cortex||chr8_28183195_G_A||chr8:28162078:28189649:clu_48481:ENSG00000134014.16||CA-55140-74848-95963-96034-102418[INC][3/75][DNT]	CA-55140-74848-95963-96034-102418[INC][3/75][DNT]	chr8	28183195	28183194	28183264	55140	ELP3	exon	1	0	0.0513941	0.136033	0.136033
chr8_28183195_G_A	Brain_Frontal_Cortex_BA9||chr8_28183195_G_A||chr8:28162078:28189649:clu_45092:ENSG00000134014.16	Brain_Frontal_Cortex_BA9||chr8_28183195_G_A||chr8:28162078:28189649:clu_45092:ENSG00000134014.16||CA-55140-74848-95963-96034-102418[INC][3/75][DNT]	CA-55140-74848-95963-96034-102418[INC][3/75][DNT]	chr8	28183195	28183194	28183264	55140	ELP3	exon	1	0	0.0513941	0.136033	0.136033
chr8_28183195_G_A	Brain_Hippocampus||chr8_28183195_G_A||chr8:28162078:28189649:clu_42836:ENSG00000134014.16	Brain_Hippocampus||chr8_28183195_G_A||chr8:28162078:28189649:clu_42836:ENSG00000134014.16||CA-55140-74848-95963-96034-102418[INC][3/75][DNT]	CA-55140-74848-95963-96034-102418[INC][3/75][DNT]	chr8	28183195	28183194	28183264	55140	ELP3	exon	1	0	0.0513941	0.136033	0.136033
chr8_28183195_G_A	Brain_Hypothalamus||chr8_28183195_G_A||chr8:28162078:28189649:clu_45988:ENSG00000134014.16	Brain_Hypothalamus||chr8_28183195_G_A||chr8:28162078:28189649:clu_45988:ENSG00000134014.16||CA-55140-74848-95963-96034-102418[INC][3/75][DNT]	CA-55140-74848-95963-96034-102418[INC][3/75][DNT]	chr8	28183195	28183194	28183264	55140	ELP3	exon	1	0	0.0513941	0.136033	0.136033
chr8_28183195_G_A	Brain_Nucleus_accumbens_basal_ganglia||chr8_28183195_G_A||chr8:28162078:28189649:clu_48222:ENSG00000134014.16	Brain_Nucleus_accumbens_basal_ganglia||chr8_28183195_G_A||chr8:28162078:28189649:clu_48222:ENSG00000134014.16||CA-55140-74848-95963-96034-102418[INC][3/75][DNT]	CA-55140-74848-95963-96034-102418[INC][3/75][DNT]	chr8	28183195	28183194	28183264	55140	ELP3	exon	1	0	0.0513941	0.136033	0.136033
chr8_28183195_G_A	Brain_Putamen_basal_ganglia||chr8_28183195_G_A||chr8:28162078:28189649:clu_41992:ENSG00000134014.16	Brain_Putamen_basal_ganglia||chr8_28183195_G_A||chr8:28162078:28189649:clu_41992:ENSG00000134014.16||CA-55140-74848-95963-96034-102418[INC][3/75][DNT]	CA-55140-74848-95963-96034-102418[INC][3/75][DNT]	chr8	28183195	28183194	28183264	55140	ELP3	exon	1	0	0.0513941	0.136033	0.136033
chr8_28183195_G_A	Brain_Spinal_cord_cervical_c-1||chr8_28183195_G_A||chr8:28162078:28189649:clu_40929:ENSG00000134014.16	Brain_Spinal_cord_cervical_c-1||chr8_28183195_G_A||chr8:28162078:28189649:clu_40929:ENSG00000134014.16||CA-55140-74848-95963-96034-102418[INC][3/75][DNT]	CA-55140-74848-95963-96034-102418[INC][3/75][DNT]	chr8	28183195	28183194	28183264	55140	ELP3	exon	1	0	0.0513941	0.136033	0.136033
chr8_28183195_G_A	Brain_Substantia_nigra||chr8_28183195_G_A||chr8:28162078:28189649:clu_36841:ENSG00000134014.16	Brain_Substantia_nigra||chr8_28183195_G_A||chr8:28162078:28189649:clu_36841:ENSG00000134014.16||CA-55140-74848-95963-96034-102418[INC][3/75][DNT]	CA-55140-74848-95963-96034-102418[INC][3/75][DNT]	chr8	28183195	28183194	28183264	55140	ELP3	exon	1	0	0.0513941	0.136033	0.136033
chr10_102466080_T_G	Brain_Amygdala||chr10_102466080_T_G||chr10:102461450:102468955:clu_7527:ENSG00000138111.14	Brain_Amygdala||chr10_102466080_T_G||chr10:102461450:102468955:clu_7527:ENSG00000138111.14||CA-79847-3038-7569-7675-10542[INC][13/1][UPT]	CA-79847-3038-7569-7675-10542[INC][13/1][UPT]	chr10	102466080	102465982	102466087	79847	TMEM180	exon	7	0	0.854305	0.128998	0.128998
chr10_102466080_T_G	Brain_Anterior_cingulate_cortex_BA24||chr10_102466080_T_G||chr10:102461450:102468955:clu_8095:ENSG00000138111.14	Brain_Anterior_cingulate_cortex_BA24||chr10_102466080_T_G||chr10:102461450:102468955:clu_8095:ENSG00000138111.14||CA-79847-3038-7569-7675-10542[INC][13/1][UPT]	CA-79847-3038-7569-7675-10542[INC][13/1][UPT]	chr10	102466080	102465982	102466087	79847	TMEM180	exon	7	0	0.854305	0.128998	0.128998
chr10_102466080_T_G	Brain_Caudate_basal_ganglia||chr10_102466080_T_G||chr10:102461450:102468955:clu_9193:ENSG00000138111.14	Brain_Caudate_basal_ganglia||chr10_102466080_T_G||chr10:102461450:102468955:clu_9193:ENSG00000138111.14||CA-79847-3038-7569-7675-10542[INC][13/1][UPT]	CA-79847-3038-7569-7675-10542[INC][13/1][UPT]	chr10	102466080	102465982	102466087	79847	TMEM180	exon	7	0	0.854305	0.128998	0.128998
chr10_102466080_T_G	Brain_Cerebellar_Hemisphere||chr10_102466080_T_G||chr10:102461450:102468955:clu_9540:ENSG00000138111.14	Brain_Cerebellar_Hemisphere||chr10_102466080_T_G||chr10:102461450:102468955:clu_9540:ENSG00000138111.14||CA-79847-3038-7569-7675-10542[INC][13/1][UPT]	CA-79847-3038-7569-7675-10542[INC][13/1][UPT]	chr10	102466080	102465982	102466087	79847	TMEM180	exon	7	0	0.854305	0.128998	0.128998
chr10_102466080_T_G	Brain_Cerebellum||chr10_102466080_T_G||chr10:102461450:102468955:clu_9964:ENSG00000138111.14	Brain_Cerebellum||chr10_102466080_T_G||chr10:102461450:102468955:clu_9964:ENSG00000138111.14||CA-79847-3038-7569-7675-10542[INC][13/1][UPT]	CA-79847-3038-7569-7675-10542[INC][13/1][UPT]	chr10	102466080	102465982	102466087	79847	TMEM180	exon	7	0	0.854305	0.128998	0.128998
chr10_102466080_T_G	Brain_Cortex||chr10_102466080_T_G||chr10:102461450:102468955:clu_9498:ENSG00000138111.14	Brain_Cortex||chr10_102466080_T_G||chr10:102461450:102468955:clu_9498:ENSG00000138111.14||CA-79847-3038-7569-7675-10542[INC][13/1][UPT]	CA-79847-3038-7569-7675-10542[INC][13/1][UPT]	chr10	102466080	102465982	102466087	79847	TMEM180	exon	7	0	0.854305	0.128998	0.128998
chr10_102466080_T_G	Brain_Frontal_Cortex_BA9||chr10_102466080_T_G||chr10:102461450:102468955:clu_8808:ENSG00000138111.14	Brain_Frontal_Cortex_BA9||chr10_102466080_T_G||chr10:102461450:102468955:clu_8808:ENSG00000138111.14||CA-79847-3038-7569-7675-10542[INC][13/1][UPT]	CA-79847-3038-7569-7675-10542[INC][13/1][UPT]	chr10	102466080	102465982	102466087	79847	TMEM180	exon	7	0	0.854305	0.128998	0.128998
chr10_102466080_T_G	Brain_Hippocampus||chr10_102466080_T_G||chr10:102461450:102468955:clu_8354:ENSG00000138111.14	Brain_Hippocampus||chr10_102466080_T_G||chr10:102461450:102468955:clu_8354:ENSG00000138111.14||CA-79847-3038-7569-7675-10542[INC][13/1][UPT]	CA-79847-3038-7569-7675-10542[INC][13/1][UPT]	chr10	102466080	102465982	102466087	79847	TMEM180	exon	7	0	0.854305	0.128998	0.128998
chr10_102466080_T_G	Brain_Hypothalamus||chr10_102466080_T_G||chr10:102461450:102468955:clu_8975:ENSG00000138111.14	Brain_Hypothalamus||chr10_102466080_T_G||chr10:102461450:102468955:clu_8975:ENSG00000138111.14||CA-79847-3038-7569-7675-10542[INC][13/1][UPT]	CA-79847-3038-7569-7675-10542[INC][13/1][UPT]	chr10	102466080	102465982	102466087	79847	TMEM180	exon	7	0	0.854305	0.128998	0.128998
chr10_102466080_T_G	Brain_Nucleus_accumbens_basal_ganglia||chr10_102466080_T_G||chr10:102461450:102468955:clu_9418:ENSG00000138111.14	Brain_Nucleus_accumbens_basal_ganglia||chr10_102466080_T_G||chr10:102461450:102468955:clu_9418:ENSG00000138111.14||CA-79847-3038-7569-7675-10542[INC][13/1][UPT]	CA-79847-3038-7569-7675-10542[INC][13/1][UPT]	chr10	102466080	102465982	102466087	79847	TMEM180	exon	7	0	0.854305	0.128998	0.128998
chr1_236542978_G_T	Brain_Anterior_cingulate_cortex_BA24||chr1_236542978_G_T||chr1:236542787:236543560:clu_39231:ENSG00000116977.18	Brain_Anterior_cingulate_cortex_BA24||chr1_236542978_G_T||chr1:236542787:236543560:clu_39231:ENSG00000116977.18||CA-3964-27574-27701-27827-28346[INC][17/40]	CA-3964-27574-27701-27827-28346[INC][17/40]	chr1	236542978	236542915	236543040	3964	LGALS8	exon	62	0	0.391494	-0.127849	0.127849
chr1_236542978_G_T	Brain_Cortex||chr1_236542978_G_T||chr1:236542787:236543560:clu_45695:ENSG00000116977.18	Brain_Cortex||chr1_236542978_G_T||chr1:236542787:236543560:clu_45695:ENSG00000116977.18||CA-3964-27574-27701-27827-28346[INC][17/40]	CA-3964-27574-27701-27827-28346[INC][17/40]	chr1	236542978	236542915	236543040	3964	LGALS8	exon	62	0	0.391494	-0.127849	0.127849
chr1_236542978_G_T	Brain_Frontal_Cortex_BA9||chr1_236542978_G_T||chr1:236542787:236543560:clu_42506:ENSG00000116977.18	Brain_Frontal_Cortex_BA9||chr1_236542978_G_T||chr1:236542787:236543560:clu_42506:ENSG00000116977.18||CA-3964-27574-27701-27827-28346[INC][17/40]	CA-3964-27574-27701-27827-28346[INC][17/40]	chr1	236542978	236542915	236543040	3964	LGALS8	exon	62	0	0.391494	-0.127849	0.127849
chr18_612753_T_C	Brain_Cerebellum||chr18_612753_T_C||chr18:607099:617988:clu_23669:ENSG00000079101.16	Brain_Cerebellum||chr18_612753_T_C||chr18:607099:617988:clu_23669:ENSG00000079101.16||CA-27098-13102-18767-18914-23990[INC][2/8]	CA-27098-13102-18767-18914-23990[INC][2/8]	chr18	612753	612765	612911	27098	CLUL1	intron	12	0	0.298057	-0.122907	0.122907
chr18_612753_T_C	Brain_Cortex||chr18_612753_T_C||chr18:607099:617988:clu_21951:ENSG00000079101.16	Brain_Cortex||chr18_612753_T_C||chr18:607099:617988:clu_21951:ENSG00000079101.16||CA-27098-13102-18767-18914-23990[INC][2/8]	CA-27098-13102-18767-18914-23990[INC][2/8]	chr18	612753	612765	612911	27098	CLUL1	intron	12	0	0.298057	-0.122907	0.122907
chr3_131501948_C_A	Brain_Caudate_basal_ganglia||chr3_131501948_C_A||chr3:131501715:131502730:clu_35589:ENSG00000114686.8	Brain_Caudate_basal_ganglia||chr3_131501948_C_A||chr3:131501715:131502730:clu_35589:ENSG00000114686.8||CA-11222-3287-4092-4173-4301[INC][3/404][UPT]	CA-11222-3287-4092-4173-4301[INC][3/404][UPT]	chr3	131501948	131501844	131501924	11222	MRPL3	intron	24	0	0.0420377	0.122743	0.122743
chr3_131501948_C_A	Brain_Hypothalamus||chr3_131501948_C_A||chr3:131501715:131502730:clu_34728:ENSG00000114686.8	Brain_Hypothalamus||chr3_131501948_C_A||chr3:131501715:131502730:clu_34728:ENSG00000114686.8||CA-11222-3287-4092-4173-4301[INC][3/404][UPT]	CA-11222-3287-4092-4173-4301[INC][3/404][UPT]	chr3	131501948	131501844	131501924	11222	MRPL3	intron	24	0	0.0420377	0.122743	0.122743
chr3_48694528_A_G	Brain_Hippocampus||chr3_48694528_A_G||chr3:48694240:48694694:clu_31272:ENSG00000068745.14	Brain_Hippocampus||chr3_48694528_A_G||chr3:48694240:48694694:clu_31272:ENSG00000068745.14||CA-51447-25585-25753-25820-26038[INC][2/25]	CA-51447-25585-25753-25820-26038[INC][2/25]	chr3	48694528	48694459	48694525	51447	IP6K2	intron	3	0	0.0232273	0.120739	0.120739
chr1_62017951_A_G	Brain_Cerebellar_Hemisphere||chr1_62017951_A_G||chr1:61990364:62037977:clu_43602:ENSG00000132849.19	Brain_Cerebellar_Hemisphere||chr1_62017951_A_G||chr1:61990364:62037977:clu_43602:ENSG00000132849.19||CA-10207-250899-278390-278482-298511[INC][32/3]	CA-10207-250899-278390-278482-298511[INC][32/3]	chr1	62017951	62017856	62017947	10207	INADL	intron	4	0	0.971226	-0.12054	0.12054
chr1_62017951_A_G	Brain_Cerebellum||chr1_62017951_A_G||chr1:61990364:62037977:clu_45865:ENSG00000132849.19	Brain_Cerebellum||chr1_62017951_A_G||chr1:61990364:62037977:clu_45865:ENSG00000132849.19||CA-10207-250899-278390-278482-298511[INC][32/3]	CA-10207-250899-278390-278482-298511[INC][32/3]	chr1	62017951	62017856	62017947	10207	INADL	intron	4	0	0.971226	-0.12054	0.12054
chr17_78382788_G_A	Brain_Anterior_cingulate_cortex_BA24||chr17_78382788_G_A||chr17:78378808:78392476:clu_10912:ENSG00000087157.18	Brain_Anterior_cingulate_cortex_BA24||chr17_78382788_G_A||chr17:78378808:78392476:clu_10912:ENSG00000087157.18||CA-9489-3191-7046-7168-16858[INC][3/122][UPT]	CA-9489-3191-7046-7168-16858[INC][3/122][UPT]	chr17	78382788	78382664	78382785	9489	PGS1	intron	3	0	0.0749349	0.116804	0.116804
chr17_78382788_G_A	Brain_Caudate_basal_ganglia||chr17_78382788_G_A||chr17:78378808:78392476:clu_12383:ENSG00000087157.18	Brain_Caudate_basal_ganglia||chr17_78382788_G_A||chr17:78378808:78392476:clu_12383:ENSG00000087157.18||CA-9489-3191-7046-7168-16858[INC][3/122][UPT]	CA-9489-3191-7046-7168-16858[INC][3/122][UPT]	chr17	78382788	78382664	78382785	9489	PGS1	intron	3	0	0.0749349	0.116804	0.116804
chr17_78382788_G_A	Brain_Cerebellar_Hemisphere||chr17_78382788_G_A||chr17:78378808:78392476:clu_12895:ENSG00000087157.18	Brain_Cerebellar_Hemisphere||chr17_78382788_G_A||chr17:78378808:78392476:clu_12895:ENSG00000087157.18||CA-9489-3191-7046-7168-16858[INC][3/122][UPT]	CA-9489-3191-7046-7168-16858[INC][3/122][UPT]	chr17	78382788	78382664	78382785	9489	PGS1	intron	3	0	0.0749349	0.116804	0.116804
chr17_78382788_G_A	Brain_Cortex||chr17_78382788_G_A||chr17:78378808:78392476:clu_12774:ENSG00000087157.18	Brain_Cortex||chr17_78382788_G_A||chr17:78378808:78392476:clu_12774:ENSG00000087157.18||CA-9489-3191-7046-7168-16858[INC][3/122][UPT]	CA-9489-3191-7046-7168-16858[INC][3/122][UPT]	chr17	78382788	78382664	78382785	9489	PGS1	intron	3	0	0.0749349	0.116804	0.116804
chr17_78382788_G_A	Brain_Frontal_Cortex_BA9||chr17_78382788_G_A||chr17:78378808:78392476:clu_11830:ENSG00000087157.18	Brain_Frontal_Cortex_BA9||chr17_78382788_G_A||chr17:78378808:78392476:clu_11830:ENSG00000087157.18||CA-9489-3191-7046-7168-16858[INC][3/122][UPT]	CA-9489-3191-7046-7168-16858[INC][3/122][UPT]	chr17	78382788	78382664	78382785	9489	PGS1	intron	3	0	0.0749349	0.116804	0.116804
chr17_78382788_G_A	Brain_Hippocampus||chr17_78382788_G_A||chr17:78378808:78392476:clu_11282:ENSG00000087157.18	Brain_Hippocampus||chr17_78382788_G_A||chr17:78378808:78392476:clu_11282:ENSG00000087157.18||CA-9489-3191-7046-7168-16858[INC][3/122][UPT]	CA-9489-3191-7046-7168-16858[INC][3/122][UPT]	chr17	78382788	78382664	78382785	9489	PGS1	intron	3	0	0.0749349	0.116804	0.116804
chr17_78382788_G_A	Brain_Nucleus_accumbens_basal_ganglia||chr17_78382788_G_A||chr17:78378808:78392476:clu_12638:ENSG00000087157.18	Brain_Nucleus_accumbens_basal_ganglia||chr17_78382788_G_A||chr17:78378808:78392476:clu_12638:ENSG00000087157.18||CA-9489-3191-7046-7168-16858[INC][3/122][UPT]	CA-9489-3191-7046-7168-16858[INC][3/122][UPT]	chr17	78382788	78382664	78382785	9489	PGS1	intron	3	0	0.0749349	0.116804	0.116804
chr17_78382788_G_A	Brain_Putamen_basal_ganglia||chr17_78382788_G_A||chr17:78378808:78392476:clu_11081:ENSG00000087157.18	Brain_Putamen_basal_ganglia||chr17_78382788_G_A||chr17:78378808:78392476:clu_11081:ENSG00000087157.18||CA-9489-3191-7046-7168-16858[INC][3/122][UPT]	CA-9489-3191-7046-7168-16858[INC][3/122][UPT]	chr17	78382788	78382664	78382785	9489	PGS1	intron	3	0	0.0749349	0.116804	0.116804
chr17_78382788_G_A	Brain_Spinal_cord_cervical_c-1||chr17_78382788_G_A||chr17:78378808:78392476:clu_10827:ENSG00000087157.18	Brain_Spinal_cord_cervical_c-1||chr17_78382788_G_A||chr17:78378808:78392476:clu_10827:ENSG00000087157.18||CA-9489-3191-7046-7168-16858[INC][3/122][UPT]	CA-9489-3191-7046-7168-16858[INC][3/122][UPT]	chr17	78382788	78382664	78382785	9489	PGS1	intron	3	0	0.0749349	0.116804	0.116804
chr11_113316054_G_A	Brain_Amygdala||chr11_113316054_G_A||chr11:113314618:113316243:clu_5879:ENSG00000149292.16	Brain_Amygdala||chr11_113316054_G_A||chr11:113314618:113316243:clu_5879:ENSG00000149292.16||CA-54970-3090-4422-4525-4714[INC][5/60][UPT]	CA-54970-3090-4422-4525-4714[INC][5/60][UPT]	chr11	113316054	113315951	113316053	54970	TTC12	intron	1	1	0.210983	-0.116684	0.116684
chr11_113316054_G_A	Brain_Anterior_cingulate_cortex_BA24||chr11_113316054_G_A||chr11:113314618:113316243:clu_6323:ENSG00000149292.16	Brain_Anterior_cingulate_cortex_BA24||chr11_113316054_G_A||chr11:113314618:113316243:clu_6323:ENSG00000149292.16||CA-54970-3090-4422-4525-4714[INC][5/60][UPT]	CA-54970-3090-4422-4525-4714[INC][5/60][UPT]	chr11	113316054	113315951	113316053	54970	TTC12	intron	1	1	0.210983	-0.116684	0.116684
chr11_113316054_G_A	Brain_Frontal_Cortex_BA9||chr11_113316054_G_A||chr11:113314618:113316243:clu_6842:ENSG00000149292.16	Brain_Frontal_Cortex_BA9||chr11_113316054_G_A||chr11:113314618:113316243:clu_6842:ENSG00000149292.16||CA-54970-3090-4422-4525-4714[INC][5/60][UPT]	CA-54970-3090-4422-4525-4714[INC][5/60][UPT]	chr11	113316054	113315951	113316053	54970	TTC12	intron	1	1	0.210983	-0.116684	0.116684
chr11_113316054_G_A	Brain_Hippocampus||chr11_113316054_G_A||chr11:113314618:113316243:clu_6521:ENSG00000149292.16	Brain_Hippocampus||chr11_113316054_G_A||chr11:113314618:113316243:clu_6521:ENSG00000149292.16||CA-54970-3090-4422-4525-4714[INC][5/60][UPT]	CA-54970-3090-4422-4525-4714[INC][5/60][UPT]	chr11	113316054	113315951	113316053	54970	TTC12	intron	1	1	0.210983	-0.116684	0.116684
chr11_113316054_G_A	Brain_Nucleus_accumbens_basal_ganglia||chr11_113316054_G_A||chr11:113314618:113316243:clu_7328:ENSG00000149292.16	Brain_Nucleus_accumbens_basal_ganglia||chr11_113316054_G_A||chr11:113314618:113316243:clu_7328:ENSG00000149292.16||CA-54970-3090-4422-4525-4714[INC][5/60][UPT]	CA-54970-3090-4422-4525-4714[INC][5/60][UPT]	chr11	113316054	113315951	113316053	54970	TTC12	intron	1	1	0.210983	-0.116684	0.116684
chr11_113316054_G_A	Brain_Spinal_cord_cervical_c-1||chr11_113316054_G_A||chr11:113314618:113316243:clu_6277:ENSG00000149292.16	Brain_Spinal_cord_cervical_c-1||chr11_113316054_G_A||chr11:113314618:113316243:clu_6277:ENSG00000149292.16||CA-54970-3090-4422-4525-4714[INC][5/60][UPT]	CA-54970-3090-4422-4525-4714[INC][5/60][UPT]	chr11	113316054	113315951	113316053	54970	TTC12	intron	1	1	0.210983	-0.116684	0.116684
chr11_113316054_G_A	Brain_Substantia_nigra||chr11_113316054_G_A||chr11:113314618:113316243:clu_5638:ENSG00000149292.16	Brain_Substantia_nigra||chr11_113316054_G_A||chr11:113314618:113316243:clu_5638:ENSG00000149292.16||CA-54970-3090-4422-4525-4714[INC][5/60][UPT]	CA-54970-3090-4422-4525-4714[INC][5/60][UPT]	chr11	113316054	113315951	113316053	54970	TTC12	intron	1	1	0.210983	-0.116684	0.116684
chr4_83459802_G_T	Brain_Amygdala||chr4_83459802_G_T||chr4:83456958:83460973:clu_26809:ENSG00000163319.10	Brain_Amygdala||chr4_83459802_G_T||chr4:83456958:83460973:clu_26809:ENSG00000163319.10||CA-51023-4027-6808-6866-8041[INC][22/2]	CA-51023-4027-6808-6866-8041[INC][22/2]	chr4	83459802	83459740	83459797	51023	MRPS18C	intron	5	0	0.956955	-0.116534	0.116534
chr4_83459802_G_T	Brain_Anterior_cingulate_cortex_BA24||chr4_83459802_G_T||chr4:83456958:83460973:clu_28889:ENSG00000163319.10	Brain_Anterior_cingulate_cortex_BA24||chr4_83459802_G_T||chr4:83456958:83460973:clu_28889:ENSG00000163319.10||CA-51023-4027-6808-6866-8041[INC][22/2]	CA-51023-4027-6808-6866-8041[INC][22/2]	chr4	83459802	83459740	83459797	51023	MRPS18C	intron	5	0	0.956955	-0.116534	0.116534
chr4_83459802_G_T	Brain_Caudate_basal_ganglia||chr4_83459802_G_T||chr4:83456958:83460973:clu_32706:ENSG00000163319.10	Brain_Caudate_basal_ganglia||chr4_83459802_G_T||chr4:83456958:83460973:clu_32706:ENSG00000163319.10||CA-51023-4027-6808-6866-8041[INC][22/2]	CA-51023-4027-6808-6866-8041[INC][22/2]	chr4	83459802	83459740	83459797	84142	FAM175A	intron	5	0	0.956955	-0.116534	0.116534
chr4_83459802_G_T	Brain_Cerebellar_Hemisphere||chr4_83459802_G_T||chr4:83456958:83460973:clu_34338:ENSG00000163319.10	Brain_Cerebellar_Hemisphere||chr4_83459802_G_T||chr4:83456958:83460973:clu_34338:ENSG00000163319.10||CA-51023-4027-6808-6866-8041[INC][22/2]	CA-51023-4027-6808-6866-8041[INC][22/2]	chr4	83459802	83459740	83459797	84142	FAM175A	intron	5	0	0.956955	-0.116534	0.116534
chr4_83459802_G_T	Brain_Cerebellum||chr4_83459802_G_T||chr4:83456958:83460973:clu_36034:ENSG00000163319.10	Brain_Cerebellum||chr4_83459802_G_T||chr4:83456958:83460973:clu_36034:ENSG00000163319.10||CA-51023-4027-6808-6866-8041[INC][22/2]	CA-51023-4027-6808-6866-8041[INC][22/2]	chr4	83459802	83459740	83459797	51023	MRPS18C	intron	5	0	0.956955	-0.116534	0.116534
chr4_83459802_G_T	Brain_Cortex||chr4_83459802_G_T||chr4:83456958:83460973:clu_33677:ENSG00000163319.10	Brain_Cortex||chr4_83459802_G_T||chr4:83456958:83460973:clu_33677:ENSG00000163319.10||CA-51023-4027-6808-6866-8041[INC][22/2]	CA-51023-4027-6808-6866-8041[INC][22/2]	chr4	83459802	83459740	83459797	51023	MRPS18C	intron	5	0	0.956955	-0.116534	0.116534
chr4_83459802_G_T	Brain_Frontal_Cortex_BA9||chr4_83459802_G_T||chr4:83456958:83460973:clu_31290:ENSG00000163319.10	Brain_Frontal_Cortex_BA9||chr4_83459802_G_T||chr4:83456958:83460973:clu_31290:ENSG00000163319.10||CA-51023-4027-6808-6866-8041[INC][22/2]	CA-51023-4027-6808-6866-8041[INC][22/2]	chr4	83459802	83459740	83459797	84142	FAM175A	intron	5	0	0.956955	-0.116534	0.116534
chr4_83459802_G_T	Brain_Hippocampus||chr4_83459802_G_T||chr4:83456958:83460973:clu_29774:ENSG00000163319.10	Brain_Hippocampus||chr4_83459802_G_T||chr4:83456958:83460973:clu_29774:ENSG00000163319.10||CA-51023-4027-6808-6866-8041[INC][22/2]	CA-51023-4027-6808-6866-8041[INC][22/2]	chr4	83459802	83459740	83459797	51023	MRPS18C	intron	5	0	0.956955	-0.116534	0.116534
chr4_83459802_G_T	Brain_Hypothalamus||chr4_83459802_G_T||chr4:83456958:83460973:clu_31952:ENSG00000163319.10	Brain_Hypothalamus||chr4_83459802_G_T||chr4:83456958:83460973:clu_31952:ENSG00000163319.10||CA-51023-4027-6808-6866-8041[INC][22/2]	CA-51023-4027-6808-6866-8041[INC][22/2]	chr4	83459802	83459740	83459797	84142	FAM175A	intron	5	0	0.956955	-0.116534	0.116534
chr4_83459802_G_T	Brain_Nucleus_accumbens_basal_ganglia||chr4_83459802_G_T||chr4:83456958:83460973:clu_33496:ENSG00000163319.10	Brain_Nucleus_accumbens_basal_ganglia||chr4_83459802_G_T||chr4:83456958:83460973:clu_33496:ENSG00000163319.10||CA-51023-4027-6808-6866-8041[INC][22/2]	CA-51023-4027-6808-6866-8041[INC][22/2]	chr4	83459802	83459740	83459797	84142	FAM175A	intron	5	0	0.956955	-0.116534	0.116534
chr4_83459802_G_T	Brain_Putamen_basal_ganglia||chr4_83459802_G_T||chr4:83456958:83460973:clu_29232:ENSG00000163319.10	Brain_Putamen_basal_ganglia||chr4_83459802_G_T||chr4:83456958:83460973:clu_29232:ENSG00000163319.10||CA-51023-4027-6808-6866-8041[INC][22/2]	CA-51023-4027-6808-6866-8041[INC][22/2]	chr4	83459802	83459740	83459797	84142	FAM175A	intron	5	0	0.956955	-0.116534	0.116534
chr4_83459802_G_T	Brain_Spinal_cord_cervical_c-1||chr4_83459802_G_T||chr4:83456958:83460973:clu_28536:ENSG00000163319.10	Brain_Spinal_cord_cervical_c-1||chr4_83459802_G_T||chr4:83456958:83460973:clu_28536:ENSG00000163319.10||CA-51023-4027-6808-6866-8041[INC][22/2]	CA-51023-4027-6808-6866-8041[INC][22/2]	chr4	83459802	83459740	83459797	51023	MRPS18C	intron	5	0	0.956955	-0.116534	0.116534
chr4_83459802_G_T	Brain_Substantia_nigra||chr4_83459802_G_T||chr4:83456958:83460973:clu_25746:ENSG00000163319.10	Brain_Substantia_nigra||chr4_83459802_G_T||chr4:83456958:83460973:clu_25746:ENSG00000163319.10||CA-51023-4027-6808-6866-8041[INC][22/2]	CA-51023-4027-6808-6866-8041[INC][22/2]	chr4	83459802	83459740	83459797	51023	MRPS18C	intron	5	0	0.956955	-0.116534	0.116534
chr17_41727839_G_C	Brain_Amygdala||chr17_41727839_G_C||chr17:41727144:41728201:clu_9099:ENSG00000173805.15	Brain_Amygdala||chr17_41727839_G_C||chr17:41727144:41728201:clu_9099:ENSG00000173805.15||CA-9001-9446-9810-9885-10502[INC][3/5]	CA-9001-9446-9810-9885-10502[INC][3/5]	chr17	41727839	41727762	41727836	9001	HAP1	intron	3	0	0.118525	-0.111338	0.111338
chr17_41727839_G_C	Brain_Anterior_cingulate_cortex_BA24||chr17_41727839_G_C||chr17:41727144:41728201:clu_9796:ENSG00000173805.15	Brain_Anterior_cingulate_cortex_BA24||chr17_41727839_G_C||chr17:41727144:41728201:clu_9796:ENSG00000173805.15||CA-9001-9446-9810-9885-10502[INC][3/5]	CA-9001-9446-9810-9885-10502[INC][3/5]	chr17	41727839	41727762	41727836	9001	HAP1	intron	3	0	0.118525	-0.111338	0.111338
chr17_41727839_G_C	Brain_Caudate_basal_ganglia||chr17_41727839_G_C||chr17:41727144:41728201:clu_11079:ENSG00000173805.15	Brain_Caudate_basal_ganglia||chr17_41727839_G_C||chr17:41727144:41728201:clu_11079:ENSG00000173805.15||CA-9001-9446-9810-9885-10502[INC][3/5]	CA-9001-9446-9810-9885-10502[INC][3/5]	chr17	41727839	41727762	41727836	9001	HAP1	intron	3	0	0.118525	-0.111338	0.111338
chr17_41727839_G_C	Brain_Cerebellar_Hemisphere||chr17_41727839_G_C||chr17:41727144:41728201:clu_11538:ENSG00000173805.15	Brain_Cerebellar_Hemisphere||chr17_41727839_G_C||chr17:41727144:41728201:clu_11538:ENSG00000173805.15||CA-9001-9446-9810-9885-10502[INC][3/5]	CA-9001-9446-9810-9885-10502[INC][3/5]	chr17	41727839	41727762	41727836	9001	HAP1	intron	3	0	0.118525	-0.111338	0.111338
chr17_41727839_G_C	Brain_Cerebellum||chr17_41727839_G_C||chr17:41727144:41728201:clu_12047:ENSG00000173805.15	Brain_Cerebellum||chr17_41727839_G_C||chr17:41727144:41728201:clu_12047:ENSG00000173805.15||CA-9001-9446-9810-9885-10502[INC][3/5]	CA-9001-9446-9810-9885-10502[INC][3/5]	chr17	41727839	41727762	41727836	9001	HAP1	intron	3	0	0.118525	-0.111338	0.111338
chr17_41727839_G_C	Brain_Cortex||chr17_41727839_G_C||chr17:41727144:41728201:clu_11466:ENSG00000173805.15	Brain_Cortex||chr17_41727839_G_C||chr17:41727144:41728201:clu_11466:ENSG00000173805.15||CA-9001-9446-9810-9885-10502[INC][3/5]	CA-9001-9446-9810-9885-10502[INC][3/5]	chr17	41727839	41727762	41727836	9001	HAP1	intron	3	0	0.118525	-0.111338	0.111338
chr17_41727839_G_C	Brain_Frontal_Cortex_BA9||chr17_41727839_G_C||chr17:41727144:41728201:clu_10638:ENSG00000173805.15	Brain_Frontal_Cortex_BA9||chr17_41727839_G_C||chr17:41727144:41728201:clu_10638:ENSG00000173805.15||CA-9001-9446-9810-9885-10502[INC][3/5]	CA-9001-9446-9810-9885-10502[INC][3/5]	chr17	41727839	41727762	41727836	9001	HAP1	intron	3	0	0.118525	-0.111338	0.111338
chr17_41727839_G_C	Brain_Hippocampus||chr17_41727839_G_C||chr17:41727144:41728201:clu_10106:ENSG00000173805.15	Brain_Hippocampus||chr17_41727839_G_C||chr17:41727144:41728201:clu_10106:ENSG00000173805.15||CA-9001-9446-9810-9885-10502[INC][3/5]	CA-9001-9446-9810-9885-10502[INC][3/5]	chr17	41727839	41727762	41727836	9001	HAP1	intron	3	0	0.118525	-0.111338	0.111338
chr17_41727839_G_C	Brain_Hypothalamus||chr17_41727839_G_C||chr17:41727144:41728201:clu_10797:ENSG00000173805.15	Brain_Hypothalamus||chr17_41727839_G_C||chr17:41727144:41728201:clu_10797:ENSG00000173805.15||CA-9001-9446-9810-9885-10502[INC][3/5]	CA-9001-9446-9810-9885-10502[INC][3/5]	chr17	41727839	41727762	41727836	9001	HAP1	intron	3	0	0.118525	-0.111338	0.111338
chr17_41727839_G_C	Brain_Nucleus_accumbens_basal_ganglia||chr17_41727839_G_C||chr17:41727144:41728201:clu_11347:ENSG00000173805.15	Brain_Nucleus_accumbens_basal_ganglia||chr17_41727839_G_C||chr17:41727144:41728201:clu_11347:ENSG00000173805.15||CA-9001-9446-9810-9885-10502[INC][3/5]	CA-9001-9446-9810-9885-10502[INC][3/5]	chr17	41727839	41727762	41727836	9001	HAP1	intron	3	0	0.118525	-0.111338	0.111338
chr17_41727839_G_C	Brain_Putamen_basal_ganglia||chr17_41727839_G_C||chr17:41727144:41728201:clu_9908:ENSG00000173805.15	Brain_Putamen_basal_ganglia||chr17_41727839_G_C||chr17:41727144:41728201:clu_9908:ENSG00000173805.15||CA-9001-9446-9810-9885-10502[INC][3/5]	CA-9001-9446-9810-9885-10502[INC][3/5]	chr17	41727839	41727762	41727836	9001	HAP1	intron	3	0	0.118525	-0.111338	0.111338
chr17_41727839_G_C	Brain_Spinal_cord_cervical_c-1||chr17_41727839_G_C||chr17:41727144:41728201:clu_9658:ENSG00000173805.15	Brain_Spinal_cord_cervical_c-1||chr17_41727839_G_C||chr17:41727144:41728201:clu_9658:ENSG00000173805.15||CA-9001-9446-9810-9885-10502[INC][3/5]	CA-9001-9446-9810-9885-10502[INC][3/5]	chr17	41727839	41727762	41727836	9001	HAP1	intron	3	0	0.118525	-0.111338	0.111338
chr17_41727839_G_C	Brain_Substantia_nigra||chr17_41727839_G_C||chr17:41727144:41728201:clu_8704:ENSG00000173805.15	Brain_Substantia_nigra||chr17_41727839_G_C||chr17:41727144:41728201:clu_8704:ENSG00000173805.15||CA-9001-9446-9810-9885-10502[INC][3/5]	CA-9001-9446-9810-9885-10502[INC][3/5]	chr17	41727839	41727762	41727836	9001	HAP1	intron	3	0	0.118525	-0.111338	0.111338
chr3_129492134_G_C	Brain_Anterior_cingulate_cortex_BA24||chr3_129492134_G_C||chr3:129488397:129495446:clu_31358:ENSG00000163913.11	Brain_Anterior_cingulate_cortex_BA24||chr3_129492134_G_C||chr3:129488397:129495446:clu_31358:ENSG00000163913.11||CA-55764-51362-55105-55159-58410[INC][70/20]	CA-55764-51362-55105-55159-58410[INC][70/20]	chr3	129492134	129492141	129492194	55764	IFT122	intron	7	0	0.564001	0.11043	0.11043
chr3_129492134_G_C	Brain_Caudate_basal_ganglia||chr3_129492134_G_C||chr3:129488397:129495446:clu_35538:ENSG00000163913.11	Brain_Caudate_basal_ganglia||chr3_129492134_G_C||chr3:129488397:129495446:clu_35538:ENSG00000163913.11||CA-55764-51362-55105-55159-58410[INC][70/20]	CA-55764-51362-55105-55159-58410[INC][70/20]	chr3	129492134	129492141	129492194	55764	IFT122	intron	7	0	0.564001	0.11043	0.11043
chr3_129492134_G_C	Brain_Cerebellum||chr3_129492134_G_C||chr3:129488397:129495446:clu_39019:ENSG00000163913.11	Brain_Cerebellum||chr3_129492134_G_C||chr3:129488397:129495446:clu_39019:ENSG00000163913.11||CA-55764-51362-55105-55159-58410[INC][70/20]	CA-55764-51362-55105-55159-58410[INC][70/20]	chr3	129492134	129492141	129492194	55764	IFT122	intron	7	0	0.564001	0.11043	0.11043
chr3_129492134_G_C	Brain_Cortex||chr3_129492134_G_C||chr3:129488397:129495446:clu_36545:ENSG00000163913.11	Brain_Cortex||chr3_129492134_G_C||chr3:129488397:129495446:clu_36545:ENSG00000163913.11||CA-55764-51362-55105-55159-58410[INC][70/20]	CA-55764-51362-55105-55159-58410[INC][70/20]	chr3	129492134	129492141	129492194	55764	IFT122	intron	7	0	0.564001	0.11043	0.11043
chr3_129492134_G_C	Brain_Frontal_Cortex_BA9||chr3_129492134_G_C||chr3:129488397:129495446:clu_34009:ENSG00000163913.11	Brain_Frontal_Cortex_BA9||chr3_129492134_G_C||chr3:129488397:129495446:clu_34009:ENSG00000163913.11||CA-55764-51362-55105-55159-58410[INC][70/20]	CA-55764-51362-55105-55159-58410[INC][70/20]	chr3	129492134	129492141	129492194	55764	IFT122	intron	7	0	0.564001	0.11043	0.11043
chr3_129492134_G_C	Brain_Hippocampus||chr3_129492134_G_C||chr3:129488397:129495446:clu_32295:ENSG00000163913.11	Brain_Hippocampus||chr3_129492134_G_C||chr3:129488397:129495446:clu_32295:ENSG00000163913.11||CA-55764-51362-55105-55159-58410[INC][70/20]	CA-55764-51362-55105-55159-58410[INC][70/20]	chr3	129492134	129492141	129492194	55764	IFT122	intron	7	0	0.564001	0.11043	0.11043
chr3_129492134_G_C	Brain_Hypothalamus||chr3_129492134_G_C||chr3:129488397:129495446:clu_34677:ENSG00000163913.11	Brain_Hypothalamus||chr3_129492134_G_C||chr3:129488397:129495446:clu_34677:ENSG00000163913.11||CA-55764-51362-55105-55159-58410[INC][70/20]	CA-55764-51362-55105-55159-58410[INC][70/20]	chr3	129492134	129492141	129492194	55764	IFT122	intron	7	0	0.564001	0.11043	0.11043
chr3_129492134_G_C	Brain_Nucleus_accumbens_basal_ganglia||chr3_129492134_G_C||chr3:129488397:129495446:clu_36379:ENSG00000163913.11	Brain_Nucleus_accumbens_basal_ganglia||chr3_129492134_G_C||chr3:129488397:129495446:clu_36379:ENSG00000163913.11||CA-55764-51362-55105-55159-58410[INC][70/20]	CA-55764-51362-55105-55159-58410[INC][70/20]	chr3	129492134	129492141	129492194	55764	IFT122	intron	7	0	0.564001	0.11043	0.11043
chr3_129492134_G_C	Brain_Putamen_basal_ganglia||chr3_129492134_G_C||chr3:129488397:129495446:clu_31707:ENSG00000163913.11	Brain_Putamen_basal_ganglia||chr3_129492134_G_C||chr3:129488397:129495446:clu_31707:ENSG00000163913.11||CA-55764-51362-55105-55159-58410[INC][70/20]	CA-55764-51362-55105-55159-58410[INC][70/20]	chr3	129492134	129492141	129492194	55764	IFT122	intron	7	0	0.564001	0.11043	0.11043
chr5_60799177_T_C	Brain_Anterior_cingulate_cortex_BA24||chr5_60799177_T_C||chr5:60787431:60844160:clu_26724:ENSG00000164181.13	Brain_Anterior_cingulate_cortex_BA24||chr5_60799177_T_C||chr5:60787431:60844160:clu_26724:ENSG00000164181.13||CA-79993-3115-48044-48095-59843[INC][8/5][UPT]	CA-79993-3115-48044-48095-59843[INC][8/5][UPT]	chr5	60799177	60799180	60799230	79993	ELOVL7	intron	3	0	0.508419	-0.110404	0.110404
chr5_60799177_T_C	Brain_Caudate_basal_ganglia||chr5_60799177_T_C||chr5:60787431:60844160:clu_30251:ENSG00000164181.13	Brain_Caudate_basal_ganglia||chr5_60799177_T_C||chr5:60787431:60844160:clu_30251:ENSG00000164181.13||CA-79993-3115-48044-48095-59843[INC][8/5][UPT]	CA-79993-3115-48044-48095-59843[INC][8/5][UPT]	chr5	60799177	60799180	60799230	79993	ELOVL7	intron	3	0	0.508419	-0.110404	0.110404
chr5_60799177_T_C	Brain_Cerebellar_Hemisphere||chr5_60799177_T_C||chr5:60787431:60844160:clu_31854:ENSG00000164181.13	Brain_Cerebellar_Hemisphere||chr5_60799177_T_C||chr5:60787431:60844160:clu_31854:ENSG00000164181.13||CA-79993-3115-48044-48095-59843[INC][8/5][UPT]	CA-79993-3115-48044-48095-59843[INC][8/5][UPT]	chr5	60799177	60799180	60799230	79993	ELOVL7	intron	3	0	0.508419	-0.110404	0.110404
chr5_60799177_T_C	Brain_Cortex||chr5_60799177_T_C||chr5:60787431:60844160:clu_31155:ENSG00000164181.13	Brain_Cortex||chr5_60799177_T_C||chr5:60787431:60844160:clu_31155:ENSG00000164181.13||CA-79993-3115-48044-48095-59843[INC][8/5][UPT]	CA-79993-3115-48044-48095-59843[INC][8/5][UPT]	chr5	60799177	60799180	60799230	79993	ELOVL7	intron	3	0	0.508419	-0.110404	0.110404
chr5_60799177_T_C	Brain_Hippocampus||chr5_60799177_T_C||chr5:60787431:60844160:clu_27582:ENSG00000164181.13	Brain_Hippocampus||chr5_60799177_T_C||chr5:60787431:60844160:clu_27582:ENSG00000164181.13||CA-79993-3115-48044-48095-59843[INC][8/5][UPT]	CA-79993-3115-48044-48095-59843[INC][8/5][UPT]	chr5	60799177	60799180	60799230	79993	ELOVL7	intron	3	0	0.508419	-0.110404	0.110404
chr5_60799177_T_C	Brain_Nucleus_accumbens_basal_ganglia||chr5_60799177_T_C||chr5:60787431:60844160:clu_30919:ENSG00000164181.13	Brain_Nucleus_accumbens_basal_ganglia||chr5_60799177_T_C||chr5:60787431:60844160:clu_30919:ENSG00000164181.13||CA-79993-3115-48044-48095-59843[INC][8/5][UPT]	CA-79993-3115-48044-48095-59843[INC][8/5][UPT]	chr5	60799177	60799180	60799230	79993	ELOVL7	intron	3	0	0.508419	-0.110404	0.110404
chr5_60799177_T_C	Brain_Spinal_cord_cervical_c-1||chr5_60799177_T_C||chr5:60787431:60844160:clu_26447:ENSG00000164181.13	Brain_Spinal_cord_cervical_c-1||chr5_60799177_T_C||chr5:60787431:60844160:clu_26447:ENSG00000164181.13||CA-79993-3115-48044-48095-59843[INC][8/5][UPT]	CA-79993-3115-48044-48095-59843[INC][8/5][UPT]	chr5	60799177	60799180	60799230	79993	ELOVL7	intron	3	0	0.508419	-0.110404	0.110404
chr4_169005958_C_T	Brain_Caudate_basal_ganglia||chr4_169005958_C_T||chr4:169002205:169006755:clu_33383:ENSG00000145439.11	Brain_Caudate_basal_ganglia||chr4_169005958_C_T||chr4:169002205:169006755:clu_33383:ENSG00000145439.11||CA-84869-6563-7403-7433-11112[INC][7/40]	CA-84869-6563-7403-7433-11112[INC][7/40]	chr4	169005958	169005885	169005914	84869	CBR4	intron	44	0	0.0672405	0.109313	0.109313
chr4_169005958_C_T	Brain_Frontal_Cortex_BA9||chr4_169005958_C_T||chr4:169002205:169006755:clu_31928:ENSG00000145439.11	Brain_Frontal_Cortex_BA9||chr4_169005958_C_T||chr4:169002205:169006755:clu_31928:ENSG00000145439.11||CA-84869-6563-7403-7433-11112[INC][7/40]	CA-84869-6563-7403-7433-11112[INC][7/40]	chr4	169005958	169005885	169005914	84869	CBR4	intron	44	0	0.0672405	0.109313	0.109313
chr4_169005958_C_T	Brain_Hippocampus||chr4_169005958_C_T||chr4:169002205:169006755:clu_30361:ENSG00000145439.11	Brain_Hippocampus||chr4_169005958_C_T||chr4:169002205:169006755:clu_30361:ENSG00000145439.11||CA-84869-6563-7403-7433-11112[INC][7/40]	CA-84869-6563-7403-7433-11112[INC][7/40]	chr4	169005958	169005885	169005914	84869	CBR4	intron	44	0	0.0672405	0.109313	0.109313
chr4_169005958_C_T	Brain_Hypothalamus||chr4_169005958_C_T||chr4:169002205:169006755:clu_32589:ENSG00000145439.11	Brain_Hypothalamus||chr4_169005958_C_T||chr4:169002205:169006755:clu_32589:ENSG00000145439.11||CA-84869-6563-7403-7433-11112[INC][7/40]	CA-84869-6563-7403-7433-11112[INC][7/40]	chr4	169005958	169005885	169005914	84869	CBR4	intron	44	0	0.0672405	0.109313	0.109313
chr4_169005958_C_T	Brain_Nucleus_accumbens_basal_ganglia||chr4_169005958_C_T||chr4:169002205:169006755:clu_34185:ENSG00000145439.11	Brain_Nucleus_accumbens_basal_ganglia||chr4_169005958_C_T||chr4:169002205:169006755:clu_34185:ENSG00000145439.11||CA-84869-6563-7403-7433-11112[INC][7/40]	CA-84869-6563-7403-7433-11112[INC][7/40]	chr4	169005958	169005885	169005914	84869	CBR4	intron	44	0	0.0672405	0.109313	0.109313
chr1_78628396_T_A	Brain_Cerebellar_Hemisphere||chr1_78628396_T_A||chr1:78620571:78628951:clu_43801:ENSG00000137959.15	Brain_Cerebellar_Hemisphere||chr1_78628396_T_A||chr1:78620571:78628951:clu_43801:ENSG00000137959.15||CA-10964-3190-10524-11012-11569[INC][11/24][UPT]	CA-10964-3190-10524-11012-11569[INC][11/24][UPT]	chr1	78628396	78627906	78628393	10964	IFI44L	intron	3	0	0.0739114	0.109248	0.109248
chr1_78628396_T_A	Brain_Cerebellum||chr1_78628396_T_A||chr1:78620571:78628951:clu_46062:ENSG00000137959.15	Brain_Cerebellum||chr1_78628396_T_A||chr1:78620571:78628951:clu_46062:ENSG00000137959.15||CA-10964-3190-10524-11012-11569[INC][11/24][UPT]	CA-10964-3190-10524-11012-11569[INC][11/24][UPT]	chr1	78628396	78627906	78628393	10964	IFI44L	intron	3	0	0.0739114	0.109248	0.109248
chr1_78628396_T_A	Brain_Nucleus_accumbens_basal_ganglia||chr1_78628396_T_A||chr1:78620571:78628951:clu_43012:ENSG00000137959.15	Brain_Nucleus_accumbens_basal_ganglia||chr1_78628396_T_A||chr1:78620571:78628951:clu_43012:ENSG00000137959.15||CA-10964-3190-10524-11012-11569[INC][11/24][UPT]	CA-10964-3190-10524-11012-11569[INC][11/24][UPT]	chr1	78628396	78627906	78628393	10964	IFI44L	intron	3	0	0.0739114	0.109248	0.109248
chr10_102727625_C_T	Brain_Caudate_basal_ganglia||chr10_102727625_C_T||chr10:102727157:102728431:clu_9210:ENSG00000156398.12	Brain_Caudate_basal_ganglia||chr10_102727625_C_T||chr10:102727157:102728431:clu_9210:ENSG00000156398.12||CA-118980-15640-16157-16274-16913[INC][5/104]	CA-118980-15640-16157-16274-16913[INC][5/104]	chr10	102727625	102727675	102727791	118980	SFXN2	intron	50	0	0.0864374	0.108446	0.108446
chr10_102727625_C_T	Brain_Cerebellar_Hemisphere||chr10_102727625_C_T||chr10:102727157:102728431:clu_9562:ENSG00000156398.12	Brain_Cerebellar_Hemisphere||chr10_102727625_C_T||chr10:102727157:102728431:clu_9562:ENSG00000156398.12||CA-118980-15640-16157-16274-16913[INC][5/104]	CA-118980-15640-16157-16274-16913[INC][5/104]	chr10	102727625	102727675	102727791	118980	SFXN2	intron	50	0	0.0864374	0.108446	0.108446
chr10_102727625_C_T	Brain_Cerebellum||chr10_102727625_C_T||chr10:102727157:102728431:clu_9985:ENSG00000156398.12	Brain_Cerebellum||chr10_102727625_C_T||chr10:102727157:102728431:clu_9985:ENSG00000156398.12||CA-118980-15640-16157-16274-16913[INC][5/104]	CA-118980-15640-16157-16274-16913[INC][5/104]	chr10	102727625	102727675	102727791	118980	SFXN2	intron	50	0	0.0864374	0.108446	0.108446
chr10_102727625_C_T	Brain_Nucleus_accumbens_basal_ganglia||chr10_102727625_C_T||chr10:102727157:102728431:clu_9436:ENSG00000156398.12	Brain_Nucleus_accumbens_basal_ganglia||chr10_102727625_C_T||chr10:102727157:102728431:clu_9436:ENSG00000156398.12||CA-118980-15640-16157-16274-16913[INC][5/104]	CA-118980-15640-16157-16274-16913[INC][5/104]	chr10	102727625	102727675	102727791	118980	SFXN2	intron	50	0	0.0864374	0.108446	0.108446
chr10_102727625_C_T	Brain_Putamen_basal_ganglia||chr10_102727625_C_T||chr10:102727157:102728431:clu_8248:ENSG00000156398.12	Brain_Putamen_basal_ganglia||chr10_102727625_C_T||chr10:102727157:102728431:clu_8248:ENSG00000156398.12||CA-118980-15640-16157-16274-16913[INC][5/104]	CA-118980-15640-16157-16274-16913[INC][5/104]	chr10	102727625	102727675	102727791	118980	SFXN2	intron	50	0	0.0864374	0.108446	0.108446
chr10_102727625_C_T	Brain_Spinal_cord_cervical_c-1||chr10_102727625_C_T||chr10:102727157:102728431:clu_8052:ENSG00000156398.12	Brain_Spinal_cord_cervical_c-1||chr10_102727625_C_T||chr10:102727157:102728431:clu_8052:ENSG00000156398.12||CA-118980-15640-16157-16274-16913[INC][5/104]	CA-118980-15640-16157-16274-16913[INC][5/104]	chr10	102727625	102727675	102727791	118980	SFXN2	intron	50	0	0.0864374	0.108446	0.108446
chr10_102727625_C_T	Brain_Substantia_nigra||chr10_102727625_C_T||chr10:102727157:102728431:clu_7245:ENSG00000156398.12	Brain_Substantia_nigra||chr10_102727625_C_T||chr10:102727157:102728431:clu_7245:ENSG00000156398.12||CA-118980-15640-16157-16274-16913[INC][5/104]	CA-118980-15640-16157-16274-16913[INC][5/104]	chr10	102727625	102727675	102727791	118980	SFXN2	intron	50	0	0.0864374	0.108446	0.108446
chr22_46292311_C_A	Brain_Caudate_basal_ganglia||chr22_46292311_C_A||chr22:46289899:46292791:clu_22996:ENSG00000075234.16	Brain_Caudate_basal_ganglia||chr22_46292311_C_A||chr22:46289899:46292791:clu_22996:ENSG00000075234.16||CA-55020-24936-27239-27365-27827[INC][8/40]	CA-55020-24936-27239-27365-27827[INC][8/40]	chr22	46292311	46292203	46292328	55020	TTC38	exon	17	0	0.269333	-0.1081	0.1081
chr22_46292311_C_A	Brain_Cerebellar_Hemisphere||chr22_46292311_C_A||chr22:46289899:46292791:clu_24365:ENSG00000075234.16	Brain_Cerebellar_Hemisphere||chr22_46292311_C_A||chr22:46289899:46292791:clu_24365:ENSG00000075234.16||CA-55020-24936-27239-27365-27827[INC][8/40]	CA-55020-24936-27239-27365-27827[INC][8/40]	chr22	46292311	46292203	46292328	55020	TTC38	exon	17	0	0.269333	-0.1081	0.1081
chr22_46292311_C_A	Brain_Cerebellum||chr22_46292311_C_A||chr22:46289899:46292791:clu_25486:ENSG00000075234.16	Brain_Cerebellum||chr22_46292311_C_A||chr22:46289899:46292791:clu_25486:ENSG00000075234.16||CA-55020-24936-27239-27365-27827[INC][8/40]	CA-55020-24936-27239-27365-27827[INC][8/40]	chr22	46292311	46292203	46292328	55020	TTC38	exon	17	0	0.269333	-0.1081	0.1081
chr22_46292311_C_A	Brain_Cortex||chr22_46292311_C_A||chr22:46289899:46292791:clu_23745:ENSG00000075234.16	Brain_Cortex||chr22_46292311_C_A||chr22:46289899:46292791:clu_23745:ENSG00000075234.16||CA-55020-24936-27239-27365-27827[INC][8/40]	CA-55020-24936-27239-27365-27827[INC][8/40]	chr22	46292311	46292203	46292328	55020	TTC38	exon	17	0	0.269333	-0.1081	0.1081
chr22_46292311_C_A	Brain_Frontal_Cortex_BA9||chr22_46292311_C_A||chr22:46289899:46292791:clu_22036:ENSG00000075234.16	Brain_Frontal_Cortex_BA9||chr22_46292311_C_A||chr22:46289899:46292791:clu_22036:ENSG00000075234.16||CA-55020-24936-27239-27365-27827[INC][8/40]	CA-55020-24936-27239-27365-27827[INC][8/40]	chr22	46292311	46292203	46292328	55020	TTC38	exon	17	0	0.269333	-0.1081	0.1081
chr22_46292311_C_A	Brain_Hippocampus||chr22_46292311_C_A||chr22:46289899:46292791:clu_20996:ENSG00000075234.16	Brain_Hippocampus||chr22_46292311_C_A||chr22:46289899:46292791:clu_20996:ENSG00000075234.16||CA-55020-24936-27239-27365-27827[INC][8/40]	CA-55020-24936-27239-27365-27827[INC][8/40]	chr22	46292311	46292203	46292328	55020	TTC38	exon	17	0	0.269333	-0.1081	0.1081
chr22_46292311_C_A	Brain_Hypothalamus||chr22_46292311_C_A||chr22:46289899:46292791:clu_22473:ENSG00000075234.16	Brain_Hypothalamus||chr22_46292311_C_A||chr22:46289899:46292791:clu_22473:ENSG00000075234.16||CA-55020-24936-27239-27365-27827[INC][8/40]	CA-55020-24936-27239-27365-27827[INC][8/40]	chr22	46292311	46292203	46292328	55020	TTC38	exon	17	0	0.269333	-0.1081	0.1081
chr22_46292311_C_A	Brain_Nucleus_accumbens_basal_ganglia||chr22_46292311_C_A||chr22:46289899:46292791:clu_23491:ENSG00000075234.16	Brain_Nucleus_accumbens_basal_ganglia||chr22_46292311_C_A||chr22:46289899:46292791:clu_23491:ENSG00000075234.16||CA-55020-24936-27239-27365-27827[INC][8/40]	CA-55020-24936-27239-27365-27827[INC][8/40]	chr22	46292311	46292203	46292328	55020	TTC38	exon	17	0	0.269333	-0.1081	0.1081
chr22_46292311_C_A	Brain_Substantia_nigra||chr22_46292311_C_A||chr22:46289899:46292791:clu_18205:ENSG00000075234.16	Brain_Substantia_nigra||chr22_46292311_C_A||chr22:46289899:46292791:clu_18205:ENSG00000075234.16||CA-55020-24936-27239-27365-27827[INC][8/40]	CA-55020-24936-27239-27365-27827[INC][8/40]	chr22	46292311	46292203	46292328	55020	TTC38	exon	17	0	0.269333	-0.1081	0.1081
chr17_47840239_T_C	Brain_Caudate_basal_ganglia||chr17_47840239_T_C||chr17:47839643:47840670:clu_11458:ENSG00000141295.13	Brain_Caudate_basal_ganglia||chr17_47840239_T_C||chr17:47839643:47840670:clu_11458:ENSG00000141295.13||CA-90507-3664-3961-4143-4690[INC][95/4]	CA-90507-3664-3961-4143-4690[INC][95/4]	chr17	47840239	47840191	47840372	90507	SCRN2	exon	48	0	0.885688	-0.101921	0.101921
chr17_47840239_T_C	Brain_Cerebellum||chr17_47840239_T_C||chr17:47839643:47840670:clu_12466:ENSG00000141295.13	Brain_Cerebellum||chr17_47840239_T_C||chr17:47839643:47840670:clu_12466:ENSG00000141295.13||CA-90507-3664-3961-4143-4690[INC][95/4]	CA-90507-3664-3961-4143-4690[INC][95/4]	chr17	47840239	47840191	47840372	90507	SCRN2	exon	48	0	0.885688	-0.101921	0.101921
chr17_47840239_T_C	Brain_Cortex||chr17_47840239_T_C||chr17:47839643:47840670:clu_11860:ENSG00000141295.13	Brain_Cortex||chr17_47840239_T_C||chr17:47839643:47840670:clu_11860:ENSG00000141295.13||CA-90507-3664-3961-4143-4690[INC][95/4]	CA-90507-3664-3961-4143-4690[INC][95/4]	chr17	47840239	47840191	47840372	90507	SCRN2	exon	48	0	0.885688	-0.101921	0.101921
chr17_47840239_T_C	Brain_Frontal_Cortex_BA9||chr17_47840239_T_C||chr17:47839643:47840670:clu_11002:ENSG00000141295.13	Brain_Frontal_Cortex_BA9||chr17_47840239_T_C||chr17:47839643:47840670:clu_11002:ENSG00000141295.13||CA-90507-3664-3961-4143-4690[INC][95/4]	CA-90507-3664-3961-4143-4690[INC][95/4]	chr17	47840239	47840191	47840372	90507	SCRN2	exon	48	0	0.885688	-0.101921	0.101921
chr17_47840239_T_C	Brain_Hippocampus||chr17_47840239_T_C||chr17:47839643:47840670:clu_10445:ENSG00000141295.13	Brain_Hippocampus||chr17_47840239_T_C||chr17:47839643:47840670:clu_10445:ENSG00000141295.13||CA-90507-3664-3961-4143-4690[INC][95/4]	CA-90507-3664-3961-4143-4690[INC][95/4]	chr17	47840239	47840191	47840372	90507	SCRN2	exon	48	0	0.885688	-0.101921	0.101921
chr17_47840239_T_C	Brain_Hypothalamus||chr17_47840239_T_C||chr17:47839643:47840670:clu_11160:ENSG00000141295.13	Brain_Hypothalamus||chr17_47840239_T_C||chr17:47839643:47840670:clu_11160:ENSG00000141295.13||CA-90507-3664-3961-4143-4690[INC][95/4]	CA-90507-3664-3961-4143-4690[INC][95/4]	chr17	47840239	47840191	47840372	90507	SCRN2	exon	48	0	0.885688	-0.101921	0.101921
chr17_47840239_T_C	Brain_Nucleus_accumbens_basal_ganglia||chr17_47840239_T_C||chr17:47839643:47840670:clu_11729:ENSG00000141295.13	Brain_Nucleus_accumbens_basal_ganglia||chr17_47840239_T_C||chr17:47839643:47840670:clu_11729:ENSG00000141295.13||CA-90507-3664-3961-4143-4690[INC][95/4]	CA-90507-3664-3961-4143-4690[INC][95/4]	chr17	47840239	47840191	47840372	90507	SCRN2	exon	48	0	0.885688	-0.101921	0.101921
chr17_47840239_T_C	Brain_Putamen_basal_ganglia||chr17_47840239_T_C||chr17:47839643:47840670:clu_10246:ENSG00000141295.13	Brain_Putamen_basal_ganglia||chr17_47840239_T_C||chr17:47839643:47840670:clu_10246:ENSG00000141295.13||CA-90507-3664-3961-4143-4690[INC][95/4]	CA-90507-3664-3961-4143-4690[INC][95/4]	chr17	47840239	47840191	47840372	90507	SCRN2	exon	48	0	0.885688	-0.101921	0.101921
chr17_47840239_T_C	Brain_Substantia_nigra||chr17_47840239_T_C||chr17:47839643:47840670:clu_9004:ENSG00000141295.13	Brain_Substantia_nigra||chr17_47840239_T_C||chr17:47839643:47840670:clu_9004:ENSG00000141295.13||CA-90507-3664-3961-4143-4690[INC][95/4]	CA-90507-3664-3961-4143-4690[INC][95/4]	chr17	47840239	47840191	47840372	90507	SCRN2	exon	48	0	0.885688	-0.101921	0.101921
chr17_82037444_A_G	Brain_Amygdala||chr17_82037444_A_G||chr17:82037013:82037631:clu_10348:ENSG00000169738.7	Brain_Amygdala||chr17_82037444_A_G||chr17:82037013:82037631:clu_10348:ENSG00000169738.7||CA-51181-3067-3150-3248-3684[INC][127/1][UPT]	CA-51181-3067-3150-3248-3684[INC][127/1][UPT]	chr17	82037444	82037450	82037547	51181	DCXR	intron	6	0	0.707926	-0.10016	0.10016
chr17_82037444_A_G	Brain_Anterior_cingulate_cortex_BA24||chr17_82037444_A_G||chr17:82037013:82037631:clu_11108:ENSG00000169738.7	Brain_Anterior_cingulate_cortex_BA24||chr17_82037444_A_G||chr17:82037013:82037631:clu_11108:ENSG00000169738.7||CA-51181-3067-3150-3248-3684[INC][127/1][UPT]	CA-51181-3067-3150-3248-3684[INC][127/1][UPT]	chr17	82037444	82037450	82037547	51181	DCXR	intron	6	0	0.707926	-0.10016	0.10016
chr17_82037444_A_G	Brain_Caudate_basal_ganglia||chr17_82037444_A_G||chr17:82037013:82037631:clu_12608:ENSG00000169738.7	Brain_Caudate_basal_ganglia||chr17_82037444_A_G||chr17:82037013:82037631:clu_12608:ENSG00000169738.7||CA-51181-3067-3150-3248-3684[INC][127/1][UPT]	CA-51181-3067-3150-3248-3684[INC][127/1][UPT]	chr17	82037444	82037450	82037547	51181	DCXR	intron	6	0	0.707926	-0.10016	0.10016
chr17_82037444_A_G	Brain_Cerebellar_Hemisphere||chr17_82037444_A_G||chr17:82037013:82037631:clu_13149:ENSG00000169738.7	Brain_Cerebellar_Hemisphere||chr17_82037444_A_G||chr17:82037013:82037631:clu_13149:ENSG00000169738.7||CA-51181-3067-3150-3248-3684[INC][127/1][UPT]	CA-51181-3067-3150-3248-3684[INC][127/1][UPT]	chr17	82037444	82037450	82037547	51181	DCXR	intron	6	0	0.707926	-0.10016	0.10016
chr17_82037444_A_G	Brain_Cerebellum||chr17_82037444_A_G||chr17:82037013:82037631:clu_13717:ENSG00000169738.7	Brain_Cerebellum||chr17_82037444_A_G||chr17:82037013:82037631:clu_13717:ENSG00000169738.7||CA-51181-3067-3150-3248-3684[INC][127/1][UPT]	CA-51181-3067-3150-3248-3684[INC][127/1][UPT]	chr17	82037444	82037450	82037547	51181	DCXR	intron	6	0	0.707926	-0.10016	0.10016
chr17_82037444_A_G	Brain_Cortex||chr17_82037444_A_G||chr17:82037013:82037631:clu_13013:ENSG00000169738.7	Brain_Cortex||chr17_82037444_A_G||chr17:82037013:82037631:clu_13013:ENSG00000169738.7||CA-51181-3067-3150-3248-3684[INC][127/1][UPT]	CA-51181-3067-3150-3248-3684[INC][127/1][UPT]	chr17	82037444	82037450	82037547	51181	DCXR	intron	6	0	0.707926	-0.10016	0.10016
chr17_82037444_A_G	Brain_Frontal_Cortex_BA9||chr17_82037444_A_G||chr17:82037013:82037631:clu_12048:ENSG00000169738.7	Brain_Frontal_Cortex_BA9||chr17_82037444_A_G||chr17:82037013:82037631:clu_12048:ENSG00000169738.7||CA-51181-3067-3150-3248-3684[INC][127/1][UPT]	CA-51181-3067-3150-3248-3684[INC][127/1][UPT]	chr17	82037444	82037450	82037547	51181	DCXR	intron	6	0	0.707926	-0.10016	0.10016
chr17_82037444_A_G	Brain_Hippocampus||chr17_82037444_A_G||chr17:82037013:82037631:clu_11485:ENSG00000169738.7	Brain_Hippocampus||chr17_82037444_A_G||chr17:82037013:82037631:clu_11485:ENSG00000169738.7||CA-51181-3067-3150-3248-3684[INC][127/1][UPT]	CA-51181-3067-3150-3248-3684[INC][127/1][UPT]	chr17	82037444	82037450	82037547	51181	DCXR	intron	6	0	0.707926	-0.10016	0.10016
chr17_82037444_A_G	Brain_Hypothalamus||chr17_82037444_A_G||chr17:82037013:82037631:clu_12268:ENSG00000169738.7	Brain_Hypothalamus||chr17_82037444_A_G||chr17:82037013:82037631:clu_12268:ENSG00000169738.7||CA-51181-3067-3150-3248-3684[INC][127/1][UPT]	CA-51181-3067-3150-3248-3684[INC][127/1][UPT]	chr17	82037444	82037450	82037547	51181	DCXR	intron	6	0	0.707926	-0.10016	0.10016
chr17_82037444_A_G	Brain_Nucleus_accumbens_basal_ganglia||chr17_82037444_A_G||chr17:82037013:82037631:clu_12865:ENSG00000169738.7	Brain_Nucleus_accumbens_basal_ganglia||chr17_82037444_A_G||chr17:82037013:82037631:clu_12865:ENSG00000169738.7||CA-51181-3067-3150-3248-3684[INC][127/1][UPT]	CA-51181-3067-3150-3248-3684[INC][127/1][UPT]	chr17	82037444	82037450	82037547	51181	DCXR	intron	6	0	0.707926	-0.10016	0.10016
chr17_82037444_A_G	Brain_Putamen_basal_ganglia||chr17_82037444_A_G||chr17:82037013:82037631:clu_11287:ENSG00000169738.7	Brain_Putamen_basal_ganglia||chr17_82037444_A_G||chr17:82037013:82037631:clu_11287:ENSG00000169738.7||CA-51181-3067-3150-3248-3684[INC][127/1][UPT]	CA-51181-3067-3150-3248-3684[INC][127/1][UPT]	chr17	82037444	82037450	82037547	51181	DCXR	intron	6	0	0.707926	-0.10016	0.10016
chr17_82037444_A_G	Brain_Spinal_cord_cervical_c-1||chr17_82037444_A_G||chr17:82037013:82037631:clu_11037:ENSG00000169738.7	Brain_Spinal_cord_cervical_c-1||chr17_82037444_A_G||chr17:82037013:82037631:clu_11037:ENSG00000169738.7||CA-51181-3067-3150-3248-3684[INC][127/1][UPT]	CA-51181-3067-3150-3248-3684[INC][127/1][UPT]	chr17	82037444	82037450	82037547	51181	DCXR	intron	6	0	0.707926	-0.10016	0.10016
chr17_82037444_A_G	Brain_Substantia_nigra||chr17_82037444_A_G||chr17:82037013:82037631:clu_9959:ENSG00000169738.7	Brain_Substantia_nigra||chr17_82037444_A_G||chr17:82037013:82037631:clu_9959:ENSG00000169738.7||CA-51181-3067-3150-3248-3684[INC][127/1][UPT]	CA-51181-3067-3150-3248-3684[INC][127/1][UPT]	chr17	82037444	82037450	82037547	51181	DCXR	intron	6	0	0.707926	-0.10016	0.10016
chr15_51377428_A_C	Brain_Spinal_cord_cervical_c-1||chr15_51377428_A_C||chr15:51342047:51383436:clu_13667:ENSG00000186417.13	Brain_Spinal_cord_cervical_c-1||chr15_51377428_A_C||chr15:51342047:51383436:clu_13667:ENSG00000186417.13||CA-342035-3544-38945-38997-44932[INC][11/2][UPT]	CA-342035-3544-38945-38997-44932[INC][11/2][UPT]	chr15	51377428	51377449	51377500	342035	GLDN	intron	21	0	0.898556	-0.100106	0.100106
chr19_40334832_C_T	Brain_Amygdala||chr19_40334832_C_T||chr19:40333929:40336110:clu_16552:ENSG00000160392.13	Brain_Amygdala||chr19_40334832_C_T||chr19:40333929:40336110:clu_16552:ENSG00000160392.13||CA-126526-15418-16623-16693-17598[INC][1/45]	CA-126526-15418-16623-16693-17598[INC][1/45]	chr19	40334832	40334835	40334904	126526	C19orf47	intron	3	0	0.023583	0.0993287	0.0993287
chr19_40334832_C_T	Brain_Anterior_cingulate_cortex_BA24||chr19_40334832_C_T||chr19:40333929:40336110:clu_17811:ENSG00000160392.13	Brain_Anterior_cingulate_cortex_BA24||chr19_40334832_C_T||chr19:40333929:40336110:clu_17811:ENSG00000160392.13||CA-126526-15418-16623-16693-17598[INC][1/45]	CA-126526-15418-16623-16693-17598[INC][1/45]	chr19	40334832	40334835	40334904	126526	C19orf47	intron	3	0	0.023583	0.0993287	0.0993287
chr19_40334832_C_T	Brain_Caudate_basal_ganglia||chr19_40334832_C_T||chr19:40333929:40336110:clu_20124:ENSG00000160392.13	Brain_Caudate_basal_ganglia||chr19_40334832_C_T||chr19:40333929:40336110:clu_20124:ENSG00000160392.13||CA-126526-15418-16623-16693-17598[INC][1/45]	CA-126526-15418-16623-16693-17598[INC][1/45]	chr19	40334832	40334835	40334904	126526	C19orf47	intron	3	0	0.023583	0.0993287	0.0993287
chr19_40334832_C_T	Brain_Cerebellar_Hemisphere||chr19_40334832_C_T||chr19:40333929:40336110:clu_21400:ENSG00000160392.13	Brain_Cerebellar_Hemisphere||chr19_40334832_C_T||chr19:40333929:40336110:clu_21400:ENSG00000160392.13||CA-126526-15418-16623-16693-17598[INC][1/45]	CA-126526-15418-16623-16693-17598[INC][1/45]	chr19	40334832	40334835	40334904	126526	C19orf47	intron	3	0	0.023583	0.0993287	0.0993287
chr19_40334832_C_T	Brain_Cerebellum||chr19_40334832_C_T||chr19:40333929:40336110:clu_22403:ENSG00000160392.13	Brain_Cerebellum||chr19_40334832_C_T||chr19:40333929:40336110:clu_22403:ENSG00000160392.13||CA-126526-15418-16623-16693-17598[INC][1/45]	CA-126526-15418-16623-16693-17598[INC][1/45]	chr19	40334832	40334835	40334904	126526	C19orf47	intron	3	0	0.023583	0.0993287	0.0993287
chr19_40334832_C_T	Brain_Cortex||chr19_40334832_C_T||chr19:40333929:40336110:clu_20772:ENSG00000160392.13	Brain_Cortex||chr19_40334832_C_T||chr19:40333929:40336110:clu_20772:ENSG00000160392.13||CA-126526-15418-16623-16693-17598[INC][1/45]	CA-126526-15418-16623-16693-17598[INC][1/45]	chr19	40334832	40334835	40334904	126526	C19orf47	intron	3	0	0.023583	0.0993287	0.0993287
chr19_40334832_C_T	Brain_Frontal_Cortex_BA9||chr19_40334832_C_T||chr19:40333929:40336110:clu_19261:ENSG00000160392.13	Brain_Frontal_Cortex_BA9||chr19_40334832_C_T||chr19:40333929:40336110:clu_19261:ENSG00000160392.13||CA-126526-15418-16623-16693-17598[INC][1/45]	CA-126526-15418-16623-16693-17598[INC][1/45]	chr19	40334832	40334835	40334904	126526	C19orf47	intron	3	0	0.023583	0.0993287	0.0993287
chr19_40334832_C_T	Brain_Hippocampus||chr19_40334832_C_T||chr19:40333929:40336110:clu_18344:ENSG00000160392.13	Brain_Hippocampus||chr19_40334832_C_T||chr19:40333929:40336110:clu_18344:ENSG00000160392.13||CA-126526-15418-16623-16693-17598[INC][1/45]	CA-126526-15418-16623-16693-17598[INC][1/45]	chr19	40334832	40334835	40334904	126526	C19orf47	intron	3	0	0.023583	0.0993287	0.0993287
chr19_40334832_C_T	Brain_Hypothalamus||chr19_40334832_C_T||chr19:40333929:40336110:clu_19641:ENSG00000160392.13	Brain_Hypothalamus||chr19_40334832_C_T||chr19:40333929:40336110:clu_19641:ENSG00000160392.13||CA-126526-15418-16623-16693-17598[INC][1/45]	CA-126526-15418-16623-16693-17598[INC][1/45]	chr19	40334832	40334835	40334904	126526	C19orf47	intron	3	0	0.023583	0.0993287	0.0993287
chr19_40334832_C_T	Brain_Nucleus_accumbens_basal_ganglia||chr19_40334832_C_T||chr19:40333929:40336110:clu_20540:ENSG00000160392.13	Brain_Nucleus_accumbens_basal_ganglia||chr19_40334832_C_T||chr19:40333929:40336110:clu_20540:ENSG00000160392.13||CA-126526-15418-16623-16693-17598[INC][1/45]	CA-126526-15418-16623-16693-17598[INC][1/45]	chr19	40334832	40334835	40334904	126526	C19orf47	intron	3	0	0.023583	0.0993287	0.0993287
chr19_40334832_C_T	Brain_Putamen_basal_ganglia||chr19_40334832_C_T||chr19:40333929:40336110:clu_18041:ENSG00000160392.13	Brain_Putamen_basal_ganglia||chr19_40334832_C_T||chr19:40333929:40336110:clu_18041:ENSG00000160392.13||CA-126526-15418-16623-16693-17598[INC][1/45]	CA-126526-15418-16623-16693-17598[INC][1/45]	chr19	40334832	40334835	40334904	126526	C19orf47	intron	3	0	0.023583	0.0993287	0.0993287
chr19_40334832_C_T	Brain_Spinal_cord_cervical_c-1||chr19_40334832_C_T||chr19:40333929:40336110:clu_17585:ENSG00000160392.13	Brain_Spinal_cord_cervical_c-1||chr19_40334832_C_T||chr19:40333929:40336110:clu_17585:ENSG00000160392.13||CA-126526-15418-16623-16693-17598[INC][1/45]	CA-126526-15418-16623-16693-17598[INC][1/45]	chr19	40334832	40334835	40334904	126526	C19orf47	intron	3	0	0.023583	0.0993287	0.0993287
chr19_40334832_C_T	Brain_Substantia_nigra||chr19_40334832_C_T||chr19:40333929:40336110:clu_15899:ENSG00000160392.13	Brain_Substantia_nigra||chr19_40334832_C_T||chr19:40333929:40336110:clu_15899:ENSG00000160392.13||CA-126526-15418-16623-16693-17598[INC][1/45]	CA-126526-15418-16623-16693-17598[INC][1/45]	chr19	40334832	40334835	40334904	126526	C19orf47	intron	3	0	0.023583	0.0993287	0.0993287
chr2_200877622_C_T	Brain_Hippocampus||chr2_200877622_C_T||chr2:200877037:200881421:clu_35460:ENSG00000240344.8	Brain_Hippocampus||chr2_200877622_C_T||chr2:200877037:200881421:clu_35460:ENSG00000240344.8||CA-53938-10706-14522-14630-15089[INC][1/61]	CA-53938-10706-14522-14630-15089[INC][1/61]	chr2	200877622	200877497	200877604	53938	PPIL3	intron	18	0	0.0367693	0.0986384	0.0986384
chr2_219235536_G_A	Brain_Cerebellar_Hemisphere||chr2_219235536_G_A||chr2:219235293:219235708:clu_41042:ENSG00000163516.13	Brain_Cerebellar_Hemisphere||chr2_219235536_G_A||chr2:219235293:219235708:clu_41042:ENSG00000163516.13||CA-55139-8537-8717-8829-8951[INC][4/3]	CA-55139-8537-8717-8829-8951[INC][4/3]	chr2	219235536	219235474	219235585	55139	ANKZF1	exon	49	0	0.633378	-0.0981777	0.0981777
chr2_219235536_G_A	Brain_Cerebellum||chr2_219235536_G_A||chr2:219235293:219235708:clu_43148:ENSG00000163516.13	Brain_Cerebellum||chr2_219235536_G_A||chr2:219235293:219235708:clu_43148:ENSG00000163516.13||CA-55139-8537-8717-8829-8951[INC][4/3]	CA-55139-8537-8717-8829-8951[INC][4/3]	chr2	219235536	219235474	219235585	55139	ANKZF1	exon	49	0	0.633378	-0.0981777	0.0981777
chr19_16721395_C_G	Brain_Nucleus_accumbens_basal_ganglia||chr19_16721395_C_G||chr19:16720293:16724366:clu_19732:ENSG00000188039.13	Brain_Nucleus_accumbens_basal_ganglia||chr19_16721395_C_G||chr19:16720293:16724366:clu_19732:ENSG00000188039.13||CA-284434-3318-4422-4642-7390[INC][2/3][UPT]	CA-284434-3318-4422-4642-7390[INC][2/3][UPT]	chr19	16721395	16721398	16721617	284434	NWD1	intron	3	0	0.54382	-0.0958908	0.0958908
chr2_9476032_C_G	Brain_Amygdala||chr2_9476032_C_G||chr2:9474647:9478222:clu_29880:ENSG00000134330.18	Brain_Amygdala||chr2_9476032_C_G||chr2:9474647:9478222:clu_29880:ENSG00000134330.18||CA-285148-3119-4458-4511-6693[INC][37/16][UPT]	CA-285148-3119-4458-4511-6693[INC][37/16][UPT]	chr2	9476032	9475987	9476039	285148	IAH1	exon	7	0	0.875457	-0.0948037	0.0948037
chr2_9476032_C_G	Brain_Anterior_cingulate_cortex_BA24||chr2_9476032_C_G||chr2:9474647:9478222:clu_32259:ENSG00000134330.18	Brain_Anterior_cingulate_cortex_BA24||chr2_9476032_C_G||chr2:9474647:9478222:clu_32259:ENSG00000134330.18||CA-285148-3119-4458-4511-6693[INC][37/16][UPT]	CA-285148-3119-4458-4511-6693[INC][37/16][UPT]	chr2	9476032	9475987	9476039	285148	IAH1	exon	7	0	0.875457	-0.0948037	0.0948037
chr2_9476032_C_G	Brain_Caudate_basal_ganglia||chr2_9476032_C_G||chr2:9474647:9478222:clu_36555:ENSG00000134330.18	Brain_Caudate_basal_ganglia||chr2_9476032_C_G||chr2:9474647:9478222:clu_36555:ENSG00000134330.18||CA-285148-3119-4458-4511-6693[INC][37/16][UPT]	CA-285148-3119-4458-4511-6693[INC][37/16][UPT]	chr2	9476032	9475987	9476039	285148	IAH1	exon	7	0	0.875457	-0.0948037	0.0948037
chr2_9476032_C_G	Brain_Cerebellar_Hemisphere||chr2_9476032_C_G||chr2:9474647:9478222:clu_38175:ENSG00000134330.18	Brain_Cerebellar_Hemisphere||chr2_9476032_C_G||chr2:9474647:9478222:clu_38175:ENSG00000134330.18||CA-285148-3119-4458-4511-6693[INC][37/16][UPT]	CA-285148-3119-4458-4511-6693[INC][37/16][UPT]	chr2	9476032	9475987	9476039	285148	IAH1	exon	7	0	0.875457	-0.0948037	0.0948037
chr2_9476032_C_G	Brain_Cerebellum||chr2_9476032_C_G||chr2:9474647:9478222:clu_40119:ENSG00000134330.18	Brain_Cerebellum||chr2_9476032_C_G||chr2:9474647:9478222:clu_40119:ENSG00000134330.18||CA-285148-3119-4458-4511-6693[INC][37/16][UPT]	CA-285148-3119-4458-4511-6693[INC][37/16][UPT]	chr2	9476032	9475987	9476039	285148	IAH1	exon	7	0	0.875457	-0.0948037	0.0948037
chr2_9476032_C_G	Brain_Cortex||chr2_9476032_C_G||chr2:9474647:9478222:clu_37585:ENSG00000134330.18	Brain_Cortex||chr2_9476032_C_G||chr2:9474647:9478222:clu_37585:ENSG00000134330.18||CA-285148-3119-4458-4511-6693[INC][37/16][UPT]	CA-285148-3119-4458-4511-6693[INC][37/16][UPT]	chr2	9476032	9475987	9476039	285148	IAH1	exon	7	0	0.875457	-0.0948037	0.0948037
chr2_9476032_C_G	Brain_Frontal_Cortex_BA9||chr2_9476032_C_G||chr2:9474647:9478222:clu_34997:ENSG00000134330.18	Brain_Frontal_Cortex_BA9||chr2_9476032_C_G||chr2:9474647:9478222:clu_34997:ENSG00000134330.18||CA-285148-3119-4458-4511-6693[INC][37/16][UPT]	CA-285148-3119-4458-4511-6693[INC][37/16][UPT]	chr2	9476032	9475987	9476039	285148	IAH1	exon	7	0	0.875457	-0.0948037	0.0948037
chr2_9476032_C_G	Brain_Hippocampus||chr2_9476032_C_G||chr2:9474647:9478222:clu_33190:ENSG00000134330.18	Brain_Hippocampus||chr2_9476032_C_G||chr2:9474647:9478222:clu_33190:ENSG00000134330.18||CA-285148-3119-4458-4511-6693[INC][37/16][UPT]	CA-285148-3119-4458-4511-6693[INC][37/16][UPT]	chr2	9476032	9475987	9476039	285148	IAH1	exon	7	0	0.875457	-0.0948037	0.0948037
chr2_9476032_C_G	Brain_Hypothalamus||chr2_9476032_C_G||chr2:9474647:9478222:clu_35645:ENSG00000134330.18	Brain_Hypothalamus||chr2_9476032_C_G||chr2:9474647:9478222:clu_35645:ENSG00000134330.18||CA-285148-3119-4458-4511-6693[INC][37/16][UPT]	CA-285148-3119-4458-4511-6693[INC][37/16][UPT]	chr2	9476032	9475987	9476039	285148	IAH1	exon	7	0	0.875457	-0.0948037	0.0948037
chr2_9476032_C_G	Brain_Nucleus_accumbens_basal_ganglia||chr2_9476032_C_G||chr2:9474647:9478222:clu_37433:ENSG00000134330.18	Brain_Nucleus_accumbens_basal_ganglia||chr2_9476032_C_G||chr2:9474647:9478222:clu_37433:ENSG00000134330.18||CA-285148-3119-4458-4511-6693[INC][37/16][UPT]	CA-285148-3119-4458-4511-6693[INC][37/16][UPT]	chr2	9476032	9475987	9476039	285148	IAH1	exon	7	0	0.875457	-0.0948037	0.0948037
chr2_9476032_C_G	Brain_Putamen_basal_ganglia||chr2_9476032_C_G||chr2:9474647:9478222:clu_32609:ENSG00000134330.18	Brain_Putamen_basal_ganglia||chr2_9476032_C_G||chr2:9474647:9478222:clu_32609:ENSG00000134330.18||CA-285148-3119-4458-4511-6693[INC][37/16][UPT]	CA-285148-3119-4458-4511-6693[INC][37/16][UPT]	chr2	9476032	9475987	9476039	285148	IAH1	exon	7	0	0.875457	-0.0948037	0.0948037
chr2_9476032_C_G	Brain_Spinal_cord_cervical_c-1||chr2_9476032_C_G||chr2:9474647:9478222:clu_31790:ENSG00000134330.18	Brain_Spinal_cord_cervical_c-1||chr2_9476032_C_G||chr2:9474647:9478222:clu_31790:ENSG00000134330.18||CA-285148-3119-4458-4511-6693[INC][37/16][UPT]	CA-285148-3119-4458-4511-6693[INC][37/16][UPT]	chr2	9476032	9475987	9476039	285148	IAH1	exon	7	0	0.875457	-0.0948037	0.0948037
chr2_9476032_C_G	Brain_Substantia_nigra||chr2_9476032_C_G||chr2:9474647:9478222:clu_28641:ENSG00000134330.18	Brain_Substantia_nigra||chr2_9476032_C_G||chr2:9474647:9478222:clu_28641:ENSG00000134330.18||CA-285148-3119-4458-4511-6693[INC][37/16][UPT]	CA-285148-3119-4458-4511-6693[INC][37/16][UPT]	chr2	9476032	9475987	9476039	285148	IAH1	exon	7	0	0.875457	-0.0948037	0.0948037
chr22_42810944_A_C	Brain_Anterior_cingulate_cortex_BA24||chr22_42810944_A_C||chr22:42808890:42817142:clu_20331:ENSG00000242247.10	Brain_Anterior_cingulate_cortex_BA24||chr22_42810944_A_C||chr22:42808890:42817142:clu_20331:ENSG00000242247.10||CA-26286-43261-49458-49590-51512[INC][73/11]	CA-26286-43261-49458-49590-51512[INC][73/11]	chr22	42810944	42810813	42810944	26286	ARFGAP3	exon	0	0	0.881182	0.0934122	0.0934122
chr22_42810944_A_C	Brain_Caudate_basal_ganglia||chr22_42810944_A_C||chr22:42808890:42817142:clu_22903:ENSG00000242247.10	Brain_Caudate_basal_ganglia||chr22_42810944_A_C||chr22:42808890:42817142:clu_22903:ENSG00000242247.10||CA-26286-43261-49458-49590-51512[INC][73/11]	CA-26286-43261-49458-49590-51512[INC][73/11]	chr22	42810944	42810813	42810944	26286	ARFGAP3	exon	0	0	0.881182	0.0934122	0.0934122
chr22_42810944_A_C	Brain_Cerebellar_Hemisphere||chr22_42810944_A_C||chr22:42808890:42817142:clu_24281:ENSG00000242247.10	Brain_Cerebellar_Hemisphere||chr22_42810944_A_C||chr22:42808890:42817142:clu_24281:ENSG00000242247.10||CA-26286-43261-49458-49590-51512[INC][73/11]	CA-26286-43261-49458-49590-51512[INC][73/11]	chr22	42810944	42810813	42810944	26286	ARFGAP3	exon	0	0	0.881182	0.0934122	0.0934122
chr22_42810944_A_C	Brain_Cerebellum||chr22_42810944_A_C||chr22:42808890:42817142:clu_25400:ENSG00000242247.10	Brain_Cerebellum||chr22_42810944_A_C||chr22:42808890:42817142:clu_25400:ENSG00000242247.10||CA-26286-43261-49458-49590-51512[INC][73/11]	CA-26286-43261-49458-49590-51512[INC][73/11]	chr22	42810944	42810813	42810944	26286	ARFGAP3	exon	0	0	0.881182	0.0934122	0.0934122
chr22_42810944_A_C	Brain_Cortex||chr22_42810944_A_C||chr22:42808890:42817142:clu_23650:ENSG00000242247.10	Brain_Cortex||chr22_42810944_A_C||chr22:42808890:42817142:clu_23650:ENSG00000242247.10||CA-26286-43261-49458-49590-51512[INC][73/11]	CA-26286-43261-49458-49590-51512[INC][73/11]	chr22	42810944	42810813	42810944	26286	ARFGAP3	exon	0	0	0.881182	0.0934122	0.0934122
chr22_42810944_A_C	Brain_Frontal_Cortex_BA9||chr22_42810944_A_C||chr22:42808890:42817142:clu_21951:ENSG00000242247.10	Brain_Frontal_Cortex_BA9||chr22_42810944_A_C||chr22:42808890:42817142:clu_21951:ENSG00000242247.10||CA-26286-43261-49458-49590-51512[INC][73/11]	CA-26286-43261-49458-49590-51512[INC][73/11]	chr22	42810944	42810813	42810944	26286	ARFGAP3	exon	0	0	0.881182	0.0934122	0.0934122
chr22_42810944_A_C	Brain_Hypothalamus||chr22_42810944_A_C||chr22:42808890:42817142:clu_22389:ENSG00000242247.10	Brain_Hypothalamus||chr22_42810944_A_C||chr22:42808890:42817142:clu_22389:ENSG00000242247.10||CA-26286-43261-49458-49590-51512[INC][73/11]	CA-26286-43261-49458-49590-51512[INC][73/11]	chr22	42810944	42810813	42810944	26286	ARFGAP3	exon	0	0	0.881182	0.0934122	0.0934122
chr22_42810944_A_C	Brain_Putamen_basal_ganglia||chr22_42810944_A_C||chr22:42808890:42817142:clu_20583:ENSG00000242247.10	Brain_Putamen_basal_ganglia||chr22_42810944_A_C||chr22:42808890:42817142:clu_20583:ENSG00000242247.10||CA-26286-43261-49458-49590-51512[INC][73/11]	CA-26286-43261-49458-49590-51512[INC][73/11]	chr22	42810944	42810813	42810944	26286	ARFGAP3	exon	0	0	0.881182	0.0934122	0.0934122
chr22_42810944_A_C	Brain_Spinal_cord_cervical_c-1||chr22_42810944_A_C||chr22:42808890:42817142:clu_20045:ENSG00000242247.10	Brain_Spinal_cord_cervical_c-1||chr22_42810944_A_C||chr22:42808890:42817142:clu_20045:ENSG00000242247.10||CA-26286-43261-49458-49590-51512[INC][73/11]	CA-26286-43261-49458-49590-51512[INC][73/11]	chr22	42810944	42810813	42810944	26286	ARFGAP3	exon	0	0	0.881182	0.0934122	0.0934122
chr22_42810944_A_C	Brain_Substantia_nigra||chr22_42810944_A_C||chr22:42808890:42817142:clu_18141:ENSG00000242247.10	Brain_Substantia_nigra||chr22_42810944_A_C||chr22:42808890:42817142:clu_18141:ENSG00000242247.10||CA-26286-43261-49458-49590-51512[INC][73/11]	CA-26286-43261-49458-49590-51512[INC][73/11]	chr22	42810944	42810813	42810944	26286	ARFGAP3	exon	0	0	0.881182	0.0934122	0.0934122
chr7_23698272_A_G	Brain_Anterior_cingulate_cortex_BA24||chr7_23698272_A_G||chr7:23691596:23700786:clu_22524:ENSG00000188732.10	Brain_Anterior_cingulate_cortex_BA24||chr7_23698272_A_G||chr7:23691596:23700786:clu_22524:ENSG00000188732.10||CA-340277-14483-21078-21186-23672[INC][11/12]	CA-340277-14483-21078-21186-23672[INC][11/12]	chr7	23698272	23698192	23698299	340277	FAM221A	exon	27	0	0.33491	0.0931701	0.0931701
chr7_23698272_A_G	Brain_Caudate_basal_ganglia||chr7_23698272_A_G||chr7:23691596:23700786:clu_25423:ENSG00000188732.10	Brain_Caudate_basal_ganglia||chr7_23698272_A_G||chr7:23691596:23700786:clu_25423:ENSG00000188732.10||CA-340277-14483-21078-21186-23672[INC][11/12]	CA-340277-14483-21078-21186-23672[INC][11/12]	chr7	23698272	23698192	23698299	340277	FAM221A	exon	27	0	0.33491	0.0931701	0.0931701
chr7_23698272_A_G	Brain_Cortex||chr7_23698272_A_G||chr7:23691596:23700786:clu_26227:ENSG00000188732.10	Brain_Cortex||chr7_23698272_A_G||chr7:23691596:23700786:clu_26227:ENSG00000188732.10||CA-340277-14483-21078-21186-23672[INC][11/12]	CA-340277-14483-21078-21186-23672[INC][11/12]	chr7	23698272	23698192	23698299	340277	FAM221A	exon	27	0	0.33491	0.0931701	0.0931701
chr7_23698272_A_G	Brain_Frontal_Cortex_BA9||chr7_23698272_A_G||chr7:23691596:23700786:clu_24339:ENSG00000188732.10	Brain_Frontal_Cortex_BA9||chr7_23698272_A_G||chr7:23691596:23700786:clu_24339:ENSG00000188732.10||CA-340277-14483-21078-21186-23672[INC][11/12]	CA-340277-14483-21078-21186-23672[INC][11/12]	chr7	23698272	23698192	23698299	340277	FAM221A	exon	27	0	0.33491	0.0931701	0.0931701
chr7_23698272_A_G	Brain_Hippocampus||chr7_23698272_A_G||chr7:23691596:23700786:clu_23196:ENSG00000188732.10	Brain_Hippocampus||chr7_23698272_A_G||chr7:23691596:23700786:clu_23196:ENSG00000188732.10||CA-340277-14483-21078-21186-23672[INC][11/12]	CA-340277-14483-21078-21186-23672[INC][11/12]	chr7	23698272	23698192	23698299	340277	FAM221A	exon	27	0	0.33491	0.0931701	0.0931701
chr7_23698272_A_G	Brain_Hypothalamus||chr7_23698272_A_G||chr7:23691596:23700786:clu_24837:ENSG00000188732.10	Brain_Hypothalamus||chr7_23698272_A_G||chr7:23691596:23700786:clu_24837:ENSG00000188732.10||CA-340277-14483-21078-21186-23672[INC][11/12]	CA-340277-14483-21078-21186-23672[INC][11/12]	chr7	23698272	23698192	23698299	340277	FAM221A	exon	27	0	0.33491	0.0931701	0.0931701
chr7_23698272_A_G	Brain_Nucleus_accumbens_basal_ganglia||chr7_23698272_A_G||chr7:23691596:23700786:clu_25957:ENSG00000188732.10	Brain_Nucleus_accumbens_basal_ganglia||chr7_23698272_A_G||chr7:23691596:23700786:clu_25957:ENSG00000188732.10||CA-340277-14483-21078-21186-23672[INC][11/12]	CA-340277-14483-21078-21186-23672[INC][11/12]	chr7	23698272	23698192	23698299	340277	FAM221A	exon	27	0	0.33491	0.0931701	0.0931701
chr7_23698272_A_G	Brain_Putamen_basal_ganglia||chr7_23698272_A_G||chr7:23691596:23700786:clu_22821:ENSG00000188732.10	Brain_Putamen_basal_ganglia||chr7_23698272_A_G||chr7:23691596:23700786:clu_22821:ENSG00000188732.10||CA-340277-14483-21078-21186-23672[INC][11/12]	CA-340277-14483-21078-21186-23672[INC][11/12]	chr7	23698272	23698192	23698299	340277	FAM221A	exon	27	0	0.33491	0.0931701	0.0931701
chr7_23698272_A_G	Brain_Substantia_nigra||chr7_23698272_A_G||chr7:23691596:23700786:clu_20102:ENSG00000188732.10	Brain_Substantia_nigra||chr7_23698272_A_G||chr7:23691596:23700786:clu_20102:ENSG00000188732.10||CA-340277-14483-21078-21186-23672[INC][11/12]	CA-340277-14483-21078-21186-23672[INC][11/12]	chr7	23698272	23698192	23698299	340277	FAM221A	exon	27	0	0.33491	0.0931701	0.0931701
chr15_57402656_C_T	Brain_Caudate_basal_ganglia||chr15_57402656_C_T||chr15:57376567:57437985:clu_15721:ENSG00000128849.10	Brain_Caudate_basal_ganglia||chr15_57402656_C_T||chr15:57376567:57437985:clu_15721:ENSG00000128849.10||CA-84952-3063-29156-29210-64480[INC][1/9][UPT]	CA-84952-3063-29156-29210-64480[INC][1/9][UPT]	chr15	57402656	57402661	57402714	84952	CGNL1	intron	5	0	0.0911186	0.0929154	0.0929154
chr15_57402656_C_T	Brain_Cortex||chr15_57402656_C_T||chr15:57376567:57437985:clu_16248:ENSG00000128849.10	Brain_Cortex||chr15_57402656_C_T||chr15:57376567:57437985:clu_16248:ENSG00000128849.10||CA-84952-3063-29156-29210-64480[INC][1/9][UPT]	CA-84952-3063-29156-29210-64480[INC][1/9][UPT]	chr15	57402656	57402661	57402714	84952	CGNL1	intron	5	0	0.0911186	0.0929154	0.0929154
chr1_42450056_C_G	Brain_Cortex||chr1_42450056_C_G||chr1:42440025:42455888:clu_42483:ENSG00000066185.12	Brain_Cortex||chr1_42450056_C_G||chr1:42440025:42455888:clu_42483:ENSG00000066185.12||CA-84217-3380-9208-9350-19242[INC][3/4][UPT]	CA-84217-3380-9208-9350-19242[INC][3/4][UPT]	chr1	42450056	42449918	42450059	84217	ZMYND12	exon	3	0	0.307132	0.0914398	0.0914398
chr1_42450056_C_G	Brain_Nucleus_accumbens_basal_ganglia||chr1_42450056_C_G||chr1:42440025:42455888:clu_42323:ENSG00000066185.12	Brain_Nucleus_accumbens_basal_ganglia||chr1_42450056_C_G||chr1:42440025:42455888:clu_42323:ENSG00000066185.12||CA-84217-3380-9208-9350-19242[INC][3/4][UPT]	CA-84217-3380-9208-9350-19242[INC][3/4][UPT]	chr1	42450056	42449918	42450059	84217	ZMYND12	exon	3	0	0.307132	0.0914398	0.0914398
chr1_42450056_C_G	Brain_Spinal_cord_cervical_c-1||chr1_42450056_C_G||chr1:42440025:42455888:clu_35908:ENSG00000066185.12	Brain_Spinal_cord_cervical_c-1||chr1_42450056_C_G||chr1:42440025:42455888:clu_35908:ENSG00000066185.12||CA-84217-3380-9208-9350-19242[INC][3/4][UPT]	CA-84217-3380-9208-9350-19242[INC][3/4][UPT]	chr1	42450056	42449918	42450059	84217	ZMYND12	exon	3	0	0.307132	0.0914398	0.0914398
chr19_7928074_T_C	Brain_Cerebellar_Hemisphere||chr19_7928074_T_C||chr19:7927767:7931138:clu_19950:ENSG00000104980.7	Brain_Cerebellar_Hemisphere||chr19_7928074_T_C||chr19:7927767:7931138:clu_19950:ENSG00000104980.7||CA-10469-15686-18657-18747-19056[INC][41/1]	CA-10469-15686-18657-18747-19056[INC][41/1]	chr19	7928074	7928077	7928166	10469	TIMM44	intron	3	0	0.958626	-0.0900944	0.0900944
chr19_7928074_T_C	Brain_Cerebellum||chr19_7928074_T_C||chr19:7927767:7931138:clu_20896:ENSG00000104980.7	Brain_Cerebellum||chr19_7928074_T_C||chr19:7927767:7931138:clu_20896:ENSG00000104980.7||CA-10469-15686-18657-18747-19056[INC][41/1]	CA-10469-15686-18657-18747-19056[INC][41/1]	chr19	7928074	7928077	7928166	10469	TIMM44	intron	3	0	0.958626	-0.0900944	0.0900944
chr7_149083978_G_C	Brain_Cerebellar_Hemisphere||chr7_149083978_G_C||chr7:149080717:149090623:clu_28661:ENSG00000197362.14	Brain_Cerebellar_Hemisphere||chr7_149083978_G_C||chr7:149080717:149090623:clu_28661:ENSG00000197362.14||CA-136051-3155-9799-10122-13060[INC][1/6][UPT]	CA-136051-3155-9799-10122-13060[INC][1/6][UPT]	chr7	149083978	149083656	149083978	136051	ZNF786	exon	0	0	0.00779601	0.0891354	0.0891354
chr7_149083978_G_C	Brain_Cortex||chr7_149083978_G_C||chr7:149080717:149090623:clu_27953:ENSG00000197362.14	Brain_Cortex||chr7_149083978_G_C||chr7:149080717:149090623:clu_27953:ENSG00000197362.14||CA-136051-3155-9799-10122-13060[INC][1/6][UPT]	CA-136051-3155-9799-10122-13060[INC][1/6][UPT]	chr7	149083978	149083656	149083978	136051	ZNF786	exon	0	0	0.00779601	0.0891354	0.0891354
chr7_149083978_G_C	Brain_Frontal_Cortex_BA9||chr7_149083978_G_C||chr7:149080717:149090623:clu_25965:ENSG00000197362.14	Brain_Frontal_Cortex_BA9||chr7_149083978_G_C||chr7:149080717:149090623:clu_25965:ENSG00000197362.14||CA-136051-3155-9799-10122-13060[INC][1/6][UPT]	CA-136051-3155-9799-10122-13060[INC][1/6][UPT]	chr7	149083978	149083656	149083978	136051	ZNF786	exon	0	0	0.00779601	0.0891354	0.0891354
chr7_149083978_G_C	Brain_Hypothalamus||chr7_149083978_G_C||chr7:149080717:149090623:clu_26505:ENSG00000197362.14	Brain_Hypothalamus||chr7_149083978_G_C||chr7:149080717:149090623:clu_26505:ENSG00000197362.14||CA-136051-3155-9799-10122-13060[INC][1/6][UPT]	CA-136051-3155-9799-10122-13060[INC][1/6][UPT]	chr7	149083978	149083656	149083978	136051	ZNF786	exon	0	0	0.00779601	0.0891354	0.0891354
chr7_23698176_T_C	Brain_Anterior_cingulate_cortex_BA24||chr7_23698176_T_C||chr7:23691596:23700786:clu_22524:ENSG00000188732.10	Brain_Anterior_cingulate_cortex_BA24||chr7_23698176_T_C||chr7:23691596:23700786:clu_22524:ENSG00000188732.10||CA-340277-14483-21078-21186-23672[INC][11/12]	CA-340277-14483-21078-21186-23672[INC][11/12]	chr7	23698176	23698192	23698299	340277	FAM221A	intron	16	0	0.33491	-0.0881656	0.0881656
chr7_23698176_T_C	Brain_Caudate_basal_ganglia||chr7_23698176_T_C||chr7:23691596:23700786:clu_25423:ENSG00000188732.10	Brain_Caudate_basal_ganglia||chr7_23698176_T_C||chr7:23691596:23700786:clu_25423:ENSG00000188732.10||CA-340277-14483-21078-21186-23672[INC][11/12]	CA-340277-14483-21078-21186-23672[INC][11/12]	chr7	23698176	23698192	23698299	340277	FAM221A	intron	16	0	0.33491	-0.0881656	0.0881656
chr7_23698176_T_C	Brain_Cortex||chr7_23698176_T_C||chr7:23691596:23700786:clu_26227:ENSG00000188732.10	Brain_Cortex||chr7_23698176_T_C||chr7:23691596:23700786:clu_26227:ENSG00000188732.10||CA-340277-14483-21078-21186-23672[INC][11/12]	CA-340277-14483-21078-21186-23672[INC][11/12]	chr7	23698176	23698192	23698299	340277	FAM221A	intron	16	0	0.33491	-0.0881656	0.0881656
chr7_23698176_T_C	Brain_Frontal_Cortex_BA9||chr7_23698176_T_C||chr7:23691596:23700786:clu_24339:ENSG00000188732.10	Brain_Frontal_Cortex_BA9||chr7_23698176_T_C||chr7:23691596:23700786:clu_24339:ENSG00000188732.10||CA-340277-14483-21078-21186-23672[INC][11/12]	CA-340277-14483-21078-21186-23672[INC][11/12]	chr7	23698176	23698192	23698299	340277	FAM221A	intron	16	0	0.33491	-0.0881656	0.0881656
chr7_23698176_T_C	Brain_Hippocampus||chr7_23698176_T_C||chr7:23691596:23700786:clu_23196:ENSG00000188732.10	Brain_Hippocampus||chr7_23698176_T_C||chr7:23691596:23700786:clu_23196:ENSG00000188732.10||CA-340277-14483-21078-21186-23672[INC][11/12]	CA-340277-14483-21078-21186-23672[INC][11/12]	chr7	23698176	23698192	23698299	340277	FAM221A	intron	16	0	0.33491	-0.0881656	0.0881656
chr7_23698176_T_C	Brain_Hypothalamus||chr7_23698176_T_C||chr7:23691596:23700786:clu_24837:ENSG00000188732.10	Brain_Hypothalamus||chr7_23698176_T_C||chr7:23691596:23700786:clu_24837:ENSG00000188732.10||CA-340277-14483-21078-21186-23672[INC][11/12]	CA-340277-14483-21078-21186-23672[INC][11/12]	chr7	23698176	23698192	23698299	340277	FAM221A	intron	16	0	0.33491	-0.0881656	0.0881656
chr7_23698176_T_C	Brain_Nucleus_accumbens_basal_ganglia||chr7_23698176_T_C||chr7:23691596:23700786:clu_25957:ENSG00000188732.10	Brain_Nucleus_accumbens_basal_ganglia||chr7_23698176_T_C||chr7:23691596:23700786:clu_25957:ENSG00000188732.10||CA-340277-14483-21078-21186-23672[INC][11/12]	CA-340277-14483-21078-21186-23672[INC][11/12]	chr7	23698176	23698192	23698299	340277	FAM221A	intron	16	0	0.33491	-0.0881656	0.0881656
chr7_23698176_T_C	Brain_Putamen_basal_ganglia||chr7_23698176_T_C||chr7:23691596:23700786:clu_22821:ENSG00000188732.10	Brain_Putamen_basal_ganglia||chr7_23698176_T_C||chr7:23691596:23700786:clu_22821:ENSG00000188732.10||CA-340277-14483-21078-21186-23672[INC][11/12]	CA-340277-14483-21078-21186-23672[INC][11/12]	chr7	23698176	23698192	23698299	340277	FAM221A	intron	16	0	0.33491	-0.0881656	0.0881656
chr7_23698176_T_C	Brain_Spinal_cord_cervical_c-1||chr7_23698176_T_C||chr7:23691596:23700786:clu_22200:ENSG00000188732.10	Brain_Spinal_cord_cervical_c-1||chr7_23698176_T_C||chr7:23691596:23700786:clu_22200:ENSG00000188732.10||CA-340277-14483-21078-21186-23672[INC][11/12]	CA-340277-14483-21078-21186-23672[INC][11/12]	chr7	23698176	23698192	23698299	340277	FAM221A	intron	16	0	0.33491	-0.0881656	0.0881656
chr7_23698176_T_C	Brain_Substantia_nigra||chr7_23698176_T_C||chr7:23691596:23700786:clu_20102:ENSG00000188732.10	Brain_Substantia_nigra||chr7_23698176_T_C||chr7:23691596:23700786:clu_20102:ENSG00000188732.10||CA-340277-14483-21078-21186-23672[INC][11/12]	CA-340277-14483-21078-21186-23672[INC][11/12]	chr7	23698176	23698192	23698299	340277	FAM221A	intron	16	0	0.33491	-0.0881656	0.0881656
chr15_91017831_G_T	Brain_Cerebellum||chr15_91017831_G_T||chr15:91014433:91022154:clu_18371:ENSG00000184056.14	Brain_Cerebellum||chr15_91017831_G_T||chr15:91014433:91022154:clu_18371:ENSG00000184056.14||CA-26276-3468-7736-7817-11188[INC][4/3][UPT]	CA-26276-3468-7736-7817-11188[INC][4/3][UPT]	chr15	91017831	91017805	91017885	26276	VPS33B	exon	26	0	0.964233	-0.0866387	0.0866387
chr15_91017831_G_T	Brain_Cortex||chr15_91017831_G_T||chr15:91014433:91022154:clu_17046:ENSG00000184056.14	Brain_Cortex||chr15_91017831_G_T||chr15:91014433:91022154:clu_17046:ENSG00000184056.14||CA-26276-3468-7736-7817-11188[INC][4/3][UPT]	CA-26276-3468-7736-7817-11188[INC][4/3][UPT]	chr15	91017831	91017805	91017885	26276	VPS33B	exon	26	0	0.964233	-0.0866387	0.0866387
chr15_91017831_G_T	Brain_Frontal_Cortex_BA9||chr15_91017831_G_T||chr15:91014433:91022154:clu_15769:ENSG00000184056.14	Brain_Frontal_Cortex_BA9||chr15_91017831_G_T||chr15:91014433:91022154:clu_15769:ENSG00000184056.14||CA-26276-3468-7736-7817-11188[INC][4/3][UPT]	CA-26276-3468-7736-7817-11188[INC][4/3][UPT]	chr15	91017831	91017805	91017885	26276	VPS33B	exon	26	0	0.964233	-0.0866387	0.0866387
chr9_132852022_A_G	Brain_Caudate_basal_ganglia||chr9_132852022_A_G||chr9:132828726:132854857:clu_46307:ENSG00000165695.9	Brain_Caudate_basal_ganglia||chr9_132852022_A_G||chr9:132828726:132854857:clu_46307:ENSG00000165695.9||CA-158067-26955-29803-29895-53085[INC][3/39]	CA-158067-26955-29803-29895-53085[INC][3/39]	chr9	132852022	132851917	132852008	158067	AK8	intron	14	0	0.206069	-0.0854387	0.0854387
chr9_132852022_A_G	Brain_Cerebellum||chr9_132852022_A_G||chr9:132828726:132854857:clu_50940:ENSG00000165695.9	Brain_Cerebellum||chr9_132852022_A_G||chr9:132828726:132854857:clu_50940:ENSG00000165695.9||CA-158067-26955-29803-29895-53085[INC][3/39]	CA-158067-26955-29803-29895-53085[INC][3/39]	chr9	132852022	132851917	132852008	158067	AK8	intron	14	0	0.206069	-0.0854387	0.0854387
chr9_132852022_A_G	Brain_Nucleus_accumbens_basal_ganglia||chr9_132852022_A_G||chr9:132828726:132854857:clu_47400:ENSG00000165695.9	Brain_Nucleus_accumbens_basal_ganglia||chr9_132852022_A_G||chr9:132828726:132854857:clu_47400:ENSG00000165695.9||CA-158067-26955-29803-29895-53085[INC][3/39]	CA-158067-26955-29803-29895-53085[INC][3/39]	chr9	132852022	132851917	132852008	158067	AK8	intron	14	0	0.206069	-0.0854387	0.0854387
chr7_23692169_C_T	Brain_Amygdala||chr7_23692169_C_T||chr7:23691596:23698192:clu_20951:ENSG00000188732.10	Brain_Amygdala||chr7_23692169_C_T||chr7:23691596:23698192:clu_20951:ENSG00000188732.10||CA-340277-14483-15069-15140-21078[INC][2/12]	CA-340277-14483-15069-15140-21078[INC][2/12]	chr7	23692169	23692183	23692253	340277	FAM221A	intron	14	0	0.0706328	0.0851844	0.0851844
chr7_30463664_T_C	Brain_Caudate_basal_ganglia||chr7_30463664_T_C||chr7:30460041:30478606:clu_25513:ENSG00000106100.10	Brain_Caudate_basal_ganglia||chr7_30463664_T_C||chr7:30460041:30478606:clu_25513:ENSG00000106100.10||CA-10392-3261-18168-18258-21825[INC][21/28][UPT]	CA-10392-3261-18168-18258-21825[INC][21/28][UPT]	chr7	30463664	30463609	30463698	10392	NOD1	exon	34	0	0.432918	-0.0837458	0.0837458
chr7_30463664_T_C	Brain_Putamen_basal_ganglia||chr7_30463664_T_C||chr7:30460041:30478606:clu_22905:ENSG00000106100.10	Brain_Putamen_basal_ganglia||chr7_30463664_T_C||chr7:30460041:30478606:clu_22905:ENSG00000106100.10||CA-10392-3261-18168-18258-21825[INC][21/28][UPT]	CA-10392-3261-18168-18258-21825[INC][21/28][UPT]	chr7	30463664	30463609	30463698	10392	NOD1	exon	34	0	0.432918	-0.0837458	0.0837458
chr7_30463664_T_C	Brain_Spinal_cord_cervical_c-1||chr7_30463664_T_C||chr7:30460041:30478606:clu_22290:ENSG00000106100.10	Brain_Spinal_cord_cervical_c-1||chr7_30463664_T_C||chr7:30460041:30478606:clu_22290:ENSG00000106100.10||CA-10392-3261-18168-18258-21825[INC][21/28][UPT]	CA-10392-3261-18168-18258-21825[INC][21/28][UPT]	chr7	30463664	30463609	30463698	10392	NOD1	exon	34	0	0.432918	-0.0837458	0.0837458
chr1_207767846_G_T	Brain_Amygdala||chr1_207767846_G_T||chr1:207767195:207770321:clu_35991:ENSG00000117335.19	Brain_Amygdala||chr1_207767846_G_T||chr1:207767195:207770321:clu_35991:ENSG00000117335.19||CA-4179-18158-18741-18786-21283[INC][38/19]	CA-4179-18158-18741-18786-21283[INC][38/19]	chr1	207767846	207767779	207767823	4179	CD46	intron	23	0	0.204639	0.083381	0.083381
chr1_207767846_G_T	Brain_Anterior_cingulate_cortex_BA24||chr1_207767846_G_T||chr1:207767195:207770321:clu_38853:ENSG00000117335.19	Brain_Anterior_cingulate_cortex_BA24||chr1_207767846_G_T||chr1:207767195:207770321:clu_38853:ENSG00000117335.19||CA-4179-18158-18741-18786-21283[INC][38/19]	CA-4179-18158-18741-18786-21283[INC][38/19]	chr1	207767846	207767779	207767823	4179	CD46	intron	23	0	0.204639	0.083381	0.083381
chr1_207767846_G_T	Brain_Caudate_basal_ganglia||chr1_207767846_G_T||chr1:207767195:207770321:clu_44033:ENSG00000117335.19	Brain_Caudate_basal_ganglia||chr1_207767846_G_T||chr1:207767195:207770321:clu_44033:ENSG00000117335.19||CA-4179-18158-18741-18786-21283[INC][38/19]	CA-4179-18158-18741-18786-21283[INC][38/19]	chr1	207767846	207767779	207767823	4179	CD46	intron	23	0	0.204639	0.083381	0.083381
chr1_207767846_G_T	Brain_Cerebellar_Hemisphere||chr1_207767846_G_T||chr1:207767195:207770321:clu_45930:ENSG00000117335.19	Brain_Cerebellar_Hemisphere||chr1_207767846_G_T||chr1:207767195:207770321:clu_45930:ENSG00000117335.19||CA-4179-18158-18741-18786-21283[INC][38/19]	CA-4179-18158-18741-18786-21283[INC][38/19]	chr1	207767846	207767779	207767823	4179	CD46	intron	23	0	0.204639	0.083381	0.083381
chr1_207767846_G_T	Brain_Cortex||chr1_207767846_G_T||chr1:207767195:207770321:clu_45254:ENSG00000117335.19	Brain_Cortex||chr1_207767846_G_T||chr1:207767195:207770321:clu_45254:ENSG00000117335.19||CA-4179-18158-18741-18786-21283[INC][38/19]	CA-4179-18158-18741-18786-21283[INC][38/19]	chr1	207767846	207767779	207767823	4179	CD46	intron	23	0	0.204639	0.083381	0.083381
chr1_207767846_G_T	Brain_Frontal_Cortex_BA9||chr1_207767846_G_T||chr1:207767195:207770321:clu_42098:ENSG00000117335.19	Brain_Frontal_Cortex_BA9||chr1_207767846_G_T||chr1:207767195:207770321:clu_42098:ENSG00000117335.19||CA-4179-18158-18741-18786-21283[INC][38/19]	CA-4179-18158-18741-18786-21283[INC][38/19]	chr1	207767846	207767779	207767823	4179	CD46	intron	23	0	0.204639	0.083381	0.083381
chr1_207767846_G_T	Brain_Hippocampus||chr1_207767846_G_T||chr1:207767195:207770321:clu_40011:ENSG00000117335.19	Brain_Hippocampus||chr1_207767846_G_T||chr1:207767195:207770321:clu_40011:ENSG00000117335.19||CA-4179-18158-18741-18786-21283[INC][38/19]	CA-4179-18158-18741-18786-21283[INC][38/19]	chr1	207767846	207767779	207767823	4179	CD46	intron	23	0	0.204639	0.083381	0.083381
chr1_207767846_G_T	Brain_Hypothalamus||chr1_207767846_G_T||chr1:207767195:207770321:clu_42963:ENSG00000117335.19	Brain_Hypothalamus||chr1_207767846_G_T||chr1:207767195:207770321:clu_42963:ENSG00000117335.19||CA-4179-18158-18741-18786-21283[INC][38/19]	CA-4179-18158-18741-18786-21283[INC][38/19]	chr1	207767846	207767779	207767823	4179	CD46	intron	23	0	0.204639	0.083381	0.083381
chr1_207767846_G_T	Brain_Nucleus_accumbens_basal_ganglia||chr1_207767846_G_T||chr1:207767195:207770321:clu_45052:ENSG00000117335.19	Brain_Nucleus_accumbens_basal_ganglia||chr1_207767846_G_T||chr1:207767195:207770321:clu_45052:ENSG00000117335.19||CA-4179-18158-18741-18786-21283[INC][38/19]	CA-4179-18158-18741-18786-21283[INC][38/19]	chr1	207767846	207767779	207767823	4179	CD46	intron	23	0	0.204639	0.083381	0.083381
chr1_207767846_G_T	Brain_Putamen_basal_ganglia||chr1_207767846_G_T||chr1:207767195:207770321:clu_39238:ENSG00000117335.19	Brain_Putamen_basal_ganglia||chr1_207767846_G_T||chr1:207767195:207770321:clu_39238:ENSG00000117335.19||CA-4179-18158-18741-18786-21283[INC][38/19]	CA-4179-18158-18741-18786-21283[INC][38/19]	chr1	207767846	207767779	207767823	4179	CD46	intron	23	0	0.204639	0.083381	0.083381
chr1_207767846_G_T	Brain_Spinal_cord_cervical_c-1||chr1_207767846_G_T||chr1:207767195:207770321:clu_38271:ENSG00000117335.19	Brain_Spinal_cord_cervical_c-1||chr1_207767846_G_T||chr1:207767195:207770321:clu_38271:ENSG00000117335.19||CA-4179-18158-18741-18786-21283[INC][38/19]	CA-4179-18158-18741-18786-21283[INC][38/19]	chr1	207767846	207767779	207767823	4179	CD46	intron	23	0	0.204639	0.083381	0.083381
chr1_207767846_G_T	Brain_Substantia_nigra||chr1_207767846_G_T||chr1:207767195:207770321:clu_34451:ENSG00000117335.19	Brain_Substantia_nigra||chr1_207767846_G_T||chr1:207767195:207770321:clu_34451:ENSG00000117335.19||CA-4179-18158-18741-18786-21283[INC][38/19]	CA-4179-18158-18741-18786-21283[INC][38/19]	chr1	207767846	207767779	207767823	4179	CD46	intron	23	0	0.204639	0.083381	0.083381
chr6_96896083_C_T	Brain_Cerebellar_Hemisphere||chr6_96896083_C_T||chr6:96891391:96896744:clu_30571:ENSG00000123545.5	Brain_Cerebellar_Hemisphere||chr6_96896083_C_T||chr6:96891391:96896744:clu_30571:ENSG00000123545.5||CA-29078-4148-4738-4808-9500[INC][2/145][DNT]	CA-29078-4148-4738-4808-9500[INC][2/145][DNT]	chr6	96896083	96896084	96896153	29078	NDUFAF4	intron	1	1	0.0866248	-0.0829128	0.0829128
chr11_8917272_T_C	Brain_Amygdala||chr11_8917272_T_C||chr11:8914930:8919337:clu_4286:ENSG00000166452.11	Brain_Amygdala||chr11_8917272_T_C||chr11:8914930:8919337:clu_4286:ENSG00000166452.11||CA-56672-6777-9133-9214-11183[INC][49/5][DNT]	CA-56672-6777-9133-9214-11183[INC][49/5][DNT]	chr11	8917272	8917287	8917367	56672	AKIP1	intron	15	0	0.947289	-0.0828692	0.0828692
chr11_8917272_T_C	Brain_Anterior_cingulate_cortex_BA24||chr11_8917272_T_C||chr11:8914930:8919337:clu_4639:ENSG00000166452.11	Brain_Anterior_cingulate_cortex_BA24||chr11_8917272_T_C||chr11:8914930:8919337:clu_4639:ENSG00000166452.11||CA-56672-6777-9133-9214-11183[INC][49/5][DNT]	CA-56672-6777-9133-9214-11183[INC][49/5][DNT]	chr11	8917272	8917287	8917367	56672	AKIP1	intron	15	0	0.947289	-0.0828692	0.0828692
chr11_8917272_T_C	Brain_Caudate_basal_ganglia||chr11_8917272_T_C||chr11:8914930:8919337:clu_5244:ENSG00000166452.11	Brain_Caudate_basal_ganglia||chr11_8917272_T_C||chr11:8914930:8919337:clu_5244:ENSG00000166452.11||CA-56672-6777-9133-9214-11183[INC][49/5][DNT]	CA-56672-6777-9133-9214-11183[INC][49/5][DNT]	chr11	8917272	8917287	8917367	56672	AKIP1	intron	15	0	0.947289	-0.0828692	0.0828692
chr11_8917272_T_C	Brain_Cerebellar_Hemisphere||chr11_8917272_T_C||chr11:8914930:8919337:clu_5520:ENSG00000166452.11	Brain_Cerebellar_Hemisphere||chr11_8917272_T_C||chr11:8914930:8919337:clu_5520:ENSG00000166452.11||CA-56672-6777-9133-9214-11183[INC][49/5][DNT]	CA-56672-6777-9133-9214-11183[INC][49/5][DNT]	chr11	8917272	8917287	8917367	56672	AKIP1	intron	15	0	0.947289	-0.0828692	0.0828692
chr11_8917272_T_C	Brain_Cerebellum||chr11_8917272_T_C||chr11:8914930:8919337:clu_5775:ENSG00000166452.11	Brain_Cerebellum||chr11_8917272_T_C||chr11:8914930:8919337:clu_5775:ENSG00000166452.11||CA-56672-6777-9133-9214-11183[INC][49/5][DNT]	CA-56672-6777-9133-9214-11183[INC][49/5][DNT]	chr11	8917272	8917287	8917367	56672	AKIP1	intron	15	0	0.947289	-0.0828692	0.0828692
chr11_8917272_T_C	Brain_Cortex||chr11_8917272_T_C||chr11:8914930:8919337:clu_5445:ENSG00000166452.11	Brain_Cortex||chr11_8917272_T_C||chr11:8914930:8919337:clu_5445:ENSG00000166452.11||CA-56672-6777-9133-9214-11183[INC][49/5][DNT]	CA-56672-6777-9133-9214-11183[INC][49/5][DNT]	chr11	8917272	8917287	8917367	56672	AKIP1	intron	15	0	0.947289	-0.0828692	0.0828692
chr11_8917272_T_C	Brain_Frontal_Cortex_BA9||chr11_8917272_T_C||chr11:8914930:8919337:clu_5057:ENSG00000166452.11	Brain_Frontal_Cortex_BA9||chr11_8917272_T_C||chr11:8914930:8919337:clu_5057:ENSG00000166452.11||CA-56672-6777-9133-9214-11183[INC][49/5][DNT]	CA-56672-6777-9133-9214-11183[INC][49/5][DNT]	chr11	8917272	8917287	8917367	56672	AKIP1	intron	15	0	0.947289	-0.0828692	0.0828692
chr11_8917272_T_C	Brain_Hippocampus||chr11_8917272_T_C||chr11:8914930:8919337:clu_4785:ENSG00000166452.11	Brain_Hippocampus||chr11_8917272_T_C||chr11:8914930:8919337:clu_4785:ENSG00000166452.11||CA-56672-6777-9133-9214-11183[INC][49/5][DNT]	CA-56672-6777-9133-9214-11183[INC][49/5][DNT]	chr11	8917272	8917287	8917367	56672	AKIP1	intron	15	0	0.947289	-0.0828692	0.0828692
chr11_8917272_T_C	Brain_Hypothalamus||chr11_8917272_T_C||chr11:8914930:8919337:clu_5168:ENSG00000166452.11	Brain_Hypothalamus||chr11_8917272_T_C||chr11:8914930:8919337:clu_5168:ENSG00000166452.11||CA-56672-6777-9133-9214-11183[INC][49/5][DNT]	CA-56672-6777-9133-9214-11183[INC][49/5][DNT]	chr11	8917272	8917287	8917367	56672	AKIP1	intron	15	0	0.947289	-0.0828692	0.0828692
chr11_8917272_T_C	Brain_Nucleus_accumbens_basal_ganglia||chr11_8917272_T_C||chr11:8914930:8919337:clu_5395:ENSG00000166452.11	Brain_Nucleus_accumbens_basal_ganglia||chr11_8917272_T_C||chr11:8914930:8919337:clu_5395:ENSG00000166452.11||CA-56672-6777-9133-9214-11183[INC][49/5][DNT]	CA-56672-6777-9133-9214-11183[INC][49/5][DNT]	chr11	8917272	8917287	8917367	56672	AKIP1	intron	15	0	0.947289	-0.0828692	0.0828692
chr11_8917272_T_C	Brain_Putamen_basal_ganglia||chr11_8917272_T_C||chr11:8914930:8919337:clu_4628:ENSG00000166452.11	Brain_Putamen_basal_ganglia||chr11_8917272_T_C||chr11:8914930:8919337:clu_4628:ENSG00000166452.11||CA-56672-6777-9133-9214-11183[INC][49/5][DNT]	CA-56672-6777-9133-9214-11183[INC][49/5][DNT]	chr11	8917272	8917287	8917367	56672	AKIP1	intron	15	0	0.947289	-0.0828692	0.0828692
chr11_8917272_T_C	Brain_Spinal_cord_cervical_c-1||chr11_8917272_T_C||chr11:8914930:8919337:clu_4585:ENSG00000166452.11	Brain_Spinal_cord_cervical_c-1||chr11_8917272_T_C||chr11:8914930:8919337:clu_4585:ENSG00000166452.11||CA-56672-6777-9133-9214-11183[INC][49/5][DNT]	CA-56672-6777-9133-9214-11183[INC][49/5][DNT]	chr11	8917272	8917287	8917367	56672	AKIP1	intron	15	0	0.947289	-0.0828692	0.0828692
chr1_151090481_G_A	Brain_Cerebellar_Hemisphere||chr1_151090481_G_A||chr1:151088297:151093192:clu_44729:ENSG00000143458.11	Brain_Cerebellar_Hemisphere||chr1_151090481_G_A||chr1:151088297:151093192:clu_44729:ENSG00000143458.11||CA-126626-20720-22828-22996-25614[INC][34/4]	CA-126626-20720-22828-22996-25614[INC][34/4]	chr1	151090481	151090406	151090573	126626	GABPB2	exon	75	0	0.808771	-0.0816676	0.0816676
chr14_24291602_C_T	Brain_Cerebellar_Hemisphere||chr14_24291602_C_T||chr14:24291219:24292184:clu_17908:ENSG00000157379.13	Brain_Cerebellar_Hemisphere||chr14_24291602_C_T||chr14:24291219:24292184:clu_17908:ENSG00000157379.13||CA-115817-10650-11208-11278-11614[INC][51/2]	CA-115817-10650-11208-11278-11614[INC][51/2]	chr14	24291602	24291556	24291625	115817	DHRS1	exon	23	0	0.496911	-0.0815602	0.0815602
chr22_29225139_C_G	Brain_Amygdala||chr22_29225139_C_G||chr22:29215630:29226490:clu_18450:ENSG00000186998.15	Brain_Amygdala||chr22_29225139_C_G||chr22:29215630:29226490:clu_18450:ENSG00000186998.15||CA-129080-12719-22221-22305-23578[INC][26/3]	CA-129080-12719-22221-22305-23578[INC][26/3]	chr22	29225139	29225133	29225216	129080	EMID1	exon	6	0	0.652122	0.0812053	0.0812053
chr22_29225139_C_G	Brain_Anterior_cingulate_cortex_BA24||chr22_29225139_C_G||chr22:29215630:29226490:clu_19841:ENSG00000186998.15	Brain_Anterior_cingulate_cortex_BA24||chr22_29225139_C_G||chr22:29215630:29226490:clu_19841:ENSG00000186998.15||CA-129080-12719-22221-22305-23578[INC][26/3]	CA-129080-12719-22221-22305-23578[INC][26/3]	chr22	29225139	29225133	29225216	129080	EMID1	exon	6	0	0.652122	0.0812053	0.0812053
chr22_29225139_C_G	Brain_Caudate_basal_ganglia||chr22_29225139_C_G||chr22:29215630:29226490:clu_22367:ENSG00000186998.15	Brain_Caudate_basal_ganglia||chr22_29225139_C_G||chr22:29215630:29226490:clu_22367:ENSG00000186998.15||CA-129080-12719-22221-22305-23578[INC][26/3]	CA-129080-12719-22221-22305-23578[INC][26/3]	chr22	29225139	29225133	29225216	129080	EMID1	exon	6	0	0.652122	0.0812053	0.0812053
chr22_29225139_C_G	Brain_Cerebellum||chr22_29225139_C_G||chr22:29215630:29226490:clu_24800:ENSG00000186998.15	Brain_Cerebellum||chr22_29225139_C_G||chr22:29215630:29226490:clu_24800:ENSG00000186998.15||CA-129080-12719-22221-22305-23578[INC][26/3]	CA-129080-12719-22221-22305-23578[INC][26/3]	chr22	29225139	29225133	29225216	129080	EMID1	exon	6	0	0.652122	0.0812053	0.0812053
chr22_29225139_C_G	Brain_Cortex||chr22_29225139_C_G||chr22:29215630:29226490:clu_23092:ENSG00000186998.15	Brain_Cortex||chr22_29225139_C_G||chr22:29215630:29226490:clu_23092:ENSG00000186998.15||CA-129080-12719-22221-22305-23578[INC][26/3]	CA-129080-12719-22221-22305-23578[INC][26/3]	chr22	29225139	29225133	29225216	129080	EMID1	exon	6	0	0.652122	0.0812053	0.0812053
chr22_29225139_C_G	Brain_Frontal_Cortex_BA9||chr22_29225139_C_G||chr22:29215630:29226490:clu_21440:ENSG00000186998.15	Brain_Frontal_Cortex_BA9||chr22_29225139_C_G||chr22:29215630:29226490:clu_21440:ENSG00000186998.15||CA-129080-12719-22221-22305-23578[INC][26/3]	CA-129080-12719-22221-22305-23578[INC][26/3]	chr22	29225139	29225133	29225216	129080	EMID1	exon	6	0	0.652122	0.0812053	0.0812053
chr22_29225139_C_G	Brain_Hippocampus||chr22_29225139_C_G||chr22:29215630:29226490:clu_20425:ENSG00000186998.15	Brain_Hippocampus||chr22_29225139_C_G||chr22:29215630:29226490:clu_20425:ENSG00000186998.15||CA-129080-12719-22221-22305-23578[INC][26/3]	CA-129080-12719-22221-22305-23578[INC][26/3]	chr22	29225139	29225133	29225216	129080	EMID1	exon	6	0	0.652122	0.0812053	0.0812053
chr22_29225139_C_G	Brain_Hypothalamus||chr22_29225139_C_G||chr22:29215630:29226490:clu_21849:ENSG00000186998.15	Brain_Hypothalamus||chr22_29225139_C_G||chr22:29215630:29226490:clu_21849:ENSG00000186998.15||CA-129080-12719-22221-22305-23578[INC][26/3]	CA-129080-12719-22221-22305-23578[INC][26/3]	chr22	29225139	29225133	29225216	129080	EMID1	exon	6	0	0.652122	0.0812053	0.0812053
chr22_29225139_C_G	Brain_Nucleus_accumbens_basal_ganglia||chr22_29225139_C_G||chr22:29215630:29226490:clu_22856:ENSG00000186998.15	Brain_Nucleus_accumbens_basal_ganglia||chr22_29225139_C_G||chr22:29215630:29226490:clu_22856:ENSG00000186998.15||CA-129080-12719-22221-22305-23578[INC][26/3]	CA-129080-12719-22221-22305-23578[INC][26/3]	chr22	29225139	29225133	29225216	129080	EMID1	exon	6	0	0.652122	0.0812053	0.0812053
chr22_29225139_C_G	Brain_Putamen_basal_ganglia||chr22_29225139_C_G||chr22:29215630:29226490:clu_20093:ENSG00000186998.15	Brain_Putamen_basal_ganglia||chr22_29225139_C_G||chr22:29215630:29226490:clu_20093:ENSG00000186998.15||CA-129080-12719-22221-22305-23578[INC][26/3]	CA-129080-12719-22221-22305-23578[INC][26/3]	chr22	29225139	29225133	29225216	129080	EMID1	exon	6	0	0.652122	0.0812053	0.0812053
chr10_43162363_T_G	Brain_Cortex||chr10_43162363_T_G||chr10:43160595:43163866:clu_8435:ENSG00000169826.7	Brain_Cortex||chr10_43162363_T_G||chr10:43160595:43163866:clu_8435:ENSG00000169826.7||CA-55454-25151-26755-26916-28421[INC][2/12]	CA-55454-25151-26755-26916-28421[INC][2/12]	chr10	43162363	43162200	43162360	55454	CSGALNACT2	intron	3	0	0.0533035	0.0803145	0.0803145
chr5_31531512_A_G	Brain_Anterior_cingulate_cortex_BA24||chr5_31531512_A_G||chr5:31530924:31531990:clu_26516:ENSG00000113360.16	Brain_Anterior_cingulate_cortex_BA24||chr5_31531512_A_G||chr5:31530924:31531990:clu_26516:ENSG00000113360.16||CA-29102-3186-3650-3726-4251[INC][61/20][UPT]	CA-29102-3186-3650-3726-4251[INC][61/20][UPT]	chr5	31531512	31531450	31531525	29102	DROSHA	exon	13	0	0.732203	0.0784696	0.0784696
chr5_31531512_A_G	Brain_Cerebellar_Hemisphere||chr5_31531512_A_G||chr5:31530924:31531990:clu_31623:ENSG00000113360.16	Brain_Cerebellar_Hemisphere||chr5_31531512_A_G||chr5:31530924:31531990:clu_31623:ENSG00000113360.16||CA-29102-3186-3650-3726-4251[INC][61/20][UPT]	CA-29102-3186-3650-3726-4251[INC][61/20][UPT]	chr5	31531512	31531450	31531525	29102	DROSHA	exon	13	0	0.732203	0.0784696	0.0784696
chr5_31531512_A_G	Brain_Cerebellum||chr5_31531512_A_G||chr5:31530924:31531990:clu_33160:ENSG00000113360.16	Brain_Cerebellum||chr5_31531512_A_G||chr5:31530924:31531990:clu_33160:ENSG00000113360.16||CA-29102-3186-3650-3726-4251[INC][61/20][UPT]	CA-29102-3186-3650-3726-4251[INC][61/20][UPT]	chr5	31531512	31531450	31531525	29102	DROSHA	exon	13	0	0.732203	0.0784696	0.0784696
chr5_31531512_A_G	Brain_Cortex||chr5_31531512_A_G||chr5:31530924:31531990:clu_30910:ENSG00000113360.16	Brain_Cortex||chr5_31531512_A_G||chr5:31530924:31531990:clu_30910:ENSG00000113360.16||CA-29102-3186-3650-3726-4251[INC][61/20][UPT]	CA-29102-3186-3650-3726-4251[INC][61/20][UPT]	chr5	31531512	31531450	31531525	29102	DROSHA	exon	13	0	0.732203	0.0784696	0.0784696
chr5_31531512_A_G	Brain_Frontal_Cortex_BA9||chr5_31531512_A_G||chr5:31530924:31531990:clu_28724:ENSG00000113360.16	Brain_Frontal_Cortex_BA9||chr5_31531512_A_G||chr5:31530924:31531990:clu_28724:ENSG00000113360.16||CA-29102-3186-3650-3726-4251[INC][61/20][UPT]	CA-29102-3186-3650-3726-4251[INC][61/20][UPT]	chr5	31531512	31531450	31531525	29102	DROSHA	exon	13	0	0.732203	0.0784696	0.0784696
chr11_32602075_A_T	Brain_Amygdala||chr11_32602075_A_T||chr11:32601822:32602279:clu_4508:ENSG00000149100.12	Brain_Amygdala||chr11_32602075_A_T||chr11:32601822:32602279:clu_4508:ENSG00000149100.12||CA-10480-21056-21312-21348-21512[INC][3/310][DNT]	CA-10480-21056-21312-21348-21512[INC][3/310][DNT]	chr11	32602075	32602079	32602114	10480	EIF3M	intron	4	0	0.0366547	0.0777446	0.0777446
chr1_155319754_T_G	Brain_Amygdala||chr1_155319754_T_G||chr1:155319688:155320409:clu_35258:ENSG00000160752.14	Brain_Amygdala||chr1_155319754_T_G||chr1:155319688:155320409:clu_35258:ENSG00000160752.14||CA-2224-13941-14046-14181-14661[INC][253/7][DNT]	CA-2224-13941-14046-14181-14661[INC][253/7][DNT]	chr1	155319754	155319794	155319928	284618	RUSC1-AS1	intron	40	0	0.979213	-0.0770884	0.0770884
chr1_155319754_T_G	Brain_Anterior_cingulate_cortex_BA24||chr1_155319754_T_G||chr1:155319688:155320409:clu_38063:ENSG00000160752.14	Brain_Anterior_cingulate_cortex_BA24||chr1_155319754_T_G||chr1:155319688:155320409:clu_38063:ENSG00000160752.14||CA-2224-13941-14046-14181-14661[INC][253/7][DNT]	CA-2224-13941-14046-14181-14661[INC][253/7][DNT]	chr1	155319754	155319794	155319928	284618	RUSC1-AS1	intron	40	0	0.979213	-0.0770884	0.0770884
chr1_155319754_T_G	Brain_Caudate_basal_ganglia||chr1_155319754_T_G||chr1:155319688:155320409:clu_43122:ENSG00000160752.14	Brain_Caudate_basal_ganglia||chr1_155319754_T_G||chr1:155319688:155320409:clu_43122:ENSG00000160752.14||CA-2224-13941-14046-14181-14661[INC][253/7][DNT]	CA-2224-13941-14046-14181-14661[INC][253/7][DNT]	chr1	155319754	155319794	155319928	2224	FDPS	intron	40	0	0.979213	-0.0770884	0.0770884
chr1_155319754_T_G	Brain_Cerebellar_Hemisphere||chr1_155319754_T_G||chr1:155319688:155320409:clu_45030:ENSG00000160752.14	Brain_Cerebellar_Hemisphere||chr1_155319754_T_G||chr1:155319688:155320409:clu_45030:ENSG00000160752.14||CA-2224-13941-14046-14181-14661[INC][253/7][DNT]	CA-2224-13941-14046-14181-14661[INC][253/7][DNT]	chr1	155319754	155319794	155319928	284618	RUSC1-AS1	intron	40	0	0.979213	-0.0770884	0.0770884
chr1_155319754_T_G	Brain_Cerebellum||chr1_155319754_T_G||chr1:155319688:155320409:clu_47329:ENSG00000160752.14	Brain_Cerebellum||chr1_155319754_T_G||chr1:155319688:155320409:clu_47329:ENSG00000160752.14||CA-2224-13941-14046-14181-14661[INC][253/7][DNT]	CA-2224-13941-14046-14181-14661[INC][253/7][DNT]	chr1	155319754	155319794	155319928	284618	RUSC1-AS1	intron	40	0	0.979213	-0.0770884	0.0770884
chr1_155319754_T_G	Brain_Cortex||chr1_155319754_T_G||chr1:155319688:155320409:clu_44335:ENSG00000160752.14	Brain_Cortex||chr1_155319754_T_G||chr1:155319688:155320409:clu_44335:ENSG00000160752.14||CA-2224-13941-14046-14181-14661[INC][253/7][DNT]	CA-2224-13941-14046-14181-14661[INC][253/7][DNT]	chr1	155319754	155319794	155319928	2224	FDPS	intron	40	0	0.979213	-0.0770884	0.0770884
chr1_155319754_T_G	Brain_Frontal_Cortex_BA9||chr1_155319754_T_G||chr1:155319688:155320409:clu_41251:ENSG00000160752.14	Brain_Frontal_Cortex_BA9||chr1_155319754_T_G||chr1:155319688:155320409:clu_41251:ENSG00000160752.14||CA-2224-13941-14046-14181-14661[INC][253/7][DNT]	CA-2224-13941-14046-14181-14661[INC][253/7][DNT]	chr1	155319754	155319794	155319928	2224	FDPS	intron	40	0	0.979213	-0.0770884	0.0770884
chr1_155319754_T_G	Brain_Hippocampus||chr1_155319754_T_G||chr1:155319688:155320409:clu_39190:ENSG00000160752.14	Brain_Hippocampus||chr1_155319754_T_G||chr1:155319688:155320409:clu_39190:ENSG00000160752.14||CA-2224-13941-14046-14181-14661[INC][253/7][DNT]	CA-2224-13941-14046-14181-14661[INC][253/7][DNT]	chr1	155319754	155319794	155319928	2224	FDPS	intron	40	0	0.979213	-0.0770884	0.0770884
chr1_155319754_T_G	Brain_Hypothalamus||chr1_155319754_T_G||chr1:155319688:155320409:clu_42064:ENSG00000160752.14	Brain_Hypothalamus||chr1_155319754_T_G||chr1:155319688:155320409:clu_42064:ENSG00000160752.14||CA-2224-13941-14046-14181-14661[INC][253/7][DNT]	CA-2224-13941-14046-14181-14661[INC][253/7][DNT]	chr1	155319754	155319794	155319928	284618	RUSC1-AS1	intron	40	0	0.979213	-0.0770884	0.0770884
chr1_155319754_T_G	Brain_Nucleus_accumbens_basal_ganglia||chr1_155319754_T_G||chr1:155319688:155320409:clu_44139:ENSG00000160752.14	Brain_Nucleus_accumbens_basal_ganglia||chr1_155319754_T_G||chr1:155319688:155320409:clu_44139:ENSG00000160752.14||CA-2224-13941-14046-14181-14661[INC][253/7][DNT]	CA-2224-13941-14046-14181-14661[INC][253/7][DNT]	chr1	155319754	155319794	155319928	2224	FDPS	intron	40	0	0.979213	-0.0770884	0.0770884
chr1_155319754_T_G	Brain_Putamen_basal_ganglia||chr1_155319754_T_G||chr1:155319688:155320409:clu_38446:ENSG00000160752.14	Brain_Putamen_basal_ganglia||chr1_155319754_T_G||chr1:155319688:155320409:clu_38446:ENSG00000160752.14||CA-2224-13941-14046-14181-14661[INC][253/7][DNT]	CA-2224-13941-14046-14181-14661[INC][253/7][DNT]	chr1	155319754	155319794	155319928	2224	FDPS	intron	40	0	0.979213	-0.0770884	0.0770884
chr1_155319754_T_G	Brain_Spinal_cord_cervical_c-1||chr1_155319754_T_G||chr1:155319688:155320409:clu_37461:ENSG00000160752.14	Brain_Spinal_cord_cervical_c-1||chr1_155319754_T_G||chr1:155319688:155320409:clu_37461:ENSG00000160752.14||CA-2224-13941-14046-14181-14661[INC][253/7][DNT]	CA-2224-13941-14046-14181-14661[INC][253/7][DNT]	chr1	155319754	155319794	155319928	2224	FDPS	intron	40	0	0.979213	-0.0770884	0.0770884
chr1_155319754_T_G	Brain_Substantia_nigra||chr1_155319754_T_G||chr1:155319688:155320409:clu_33756:ENSG00000160752.14	Brain_Substantia_nigra||chr1_155319754_T_G||chr1:155319688:155320409:clu_33756:ENSG00000160752.14||CA-2224-13941-14046-14181-14661[INC][253/7][DNT]	CA-2224-13941-14046-14181-14661[INC][253/7][DNT]	chr1	155319754	155319794	155319928	284618	RUSC1-AS1	intron	40	0	0.979213	-0.0770884	0.0770884
chr3_66236632_G_A	Brain_Anterior_cingulate_cortex_BA24||chr3_66236632_G_A||chr3:66221127:66243203:clu_30828:ENSG00000144741.17	Brain_Anterior_cingulate_cortex_BA24||chr3_66236632_G_A||chr3:66221127:66243203:clu_30828:ENSG00000144741.17||CA-115286-90518-105934-106091-112593[INC][56/38][UPT]	CA-115286-90518-105934-106091-112593[INC][56/38][UPT]	chr3	66236632	66236544	66236700	115286	SLC25A26	exon	68	0	0.476416	0.0770521	0.0770521
chr3_66236632_G_A	Brain_Cerebellar_Hemisphere||chr3_66236632_G_A||chr3:66221127:66243203:clu_36629:ENSG00000144741.17	Brain_Cerebellar_Hemisphere||chr3_66236632_G_A||chr3:66221127:66243203:clu_36629:ENSG00000144741.17||CA-115286-90518-105934-106091-112593[INC][56/38][UPT]	CA-115286-90518-105934-106091-112593[INC][56/38][UPT]	chr3	66236632	66236544	66236700	115286	SLC25A26	exon	68	0	0.476416	0.0770521	0.0770521
chr3_66236632_G_A	Brain_Hippocampus||chr3_66236632_G_A||chr3:66221127:66243203:clu_31738:ENSG00000144741.17	Brain_Hippocampus||chr3_66236632_G_A||chr3:66221127:66243203:clu_31738:ENSG00000144741.17||CA-115286-90518-105934-106091-112593[INC][56/38][UPT]	CA-115286-90518-105934-106091-112593[INC][56/38][UPT]	chr3	66236632	66236544	66236700	115286	SLC25A26	exon	68	0	0.476416	0.0770521	0.0770521
chr3_66236632_G_A	Brain_Nucleus_accumbens_basal_ganglia||chr3_66236632_G_A||chr3:66221127:66243203:clu_35764:ENSG00000144741.17	Brain_Nucleus_accumbens_basal_ganglia||chr3_66236632_G_A||chr3:66221127:66243203:clu_35764:ENSG00000144741.17||CA-115286-90518-105934-106091-112593[INC][56/38][UPT]	CA-115286-90518-105934-106091-112593[INC][56/38][UPT]	chr3	66236632	66236544	66236700	115286	SLC25A26	exon	68	0	0.476416	0.0770521	0.0770521
chr3_66236632_G_A	Brain_Putamen_basal_ganglia||chr3_66236632_G_A||chr3:66221127:66243203:clu_31176:ENSG00000144741.17	Brain_Putamen_basal_ganglia||chr3_66236632_G_A||chr3:66221127:66243203:clu_31176:ENSG00000144741.17||CA-115286-90518-105934-106091-112593[INC][56/38][UPT]	CA-115286-90518-105934-106091-112593[INC][56/38][UPT]	chr3	66236632	66236544	66236700	115286	SLC25A26	exon	68	0	0.476416	0.0770521	0.0770521
chr3_66236632_G_A	Brain_Spinal_cord_cervical_c-1||chr3_66236632_G_A||chr3:66221127:66243203:clu_30435:ENSG00000144741.17	Brain_Spinal_cord_cervical_c-1||chr3_66236632_G_A||chr3:66221127:66243203:clu_30435:ENSG00000144741.17||CA-115286-90518-105934-106091-112593[INC][56/38][UPT]	CA-115286-90518-105934-106091-112593[INC][56/38][UPT]	chr3	66236632	66236544	66236700	115286	SLC25A26	exon	68	0	0.476416	0.0770521	0.0770521
chr3_66236632_G_A	Brain_Substantia_nigra||chr3_66236632_G_A||chr3:66221127:66243203:clu_27431:ENSG00000144741.17	Brain_Substantia_nigra||chr3_66236632_G_A||chr3:66221127:66243203:clu_27431:ENSG00000144741.17||CA-115286-90518-105934-106091-112593[INC][56/38][UPT]	CA-115286-90518-105934-106091-112593[INC][56/38][UPT]	chr3	66236632	66236544	66236700	115286	SLC25A26	exon	68	0	0.476416	0.0770521	0.0770521
chr17_82037444_A_G	Brain_Amygdala||chr17_82037444_A_G||chr17:82037013:82037631:clu_10348:ENSG00000169738.7	Brain_Amygdala||chr17_82037444_A_G||chr17:82037013:82037631:clu_10348:ENSG00000169738.7||CA-51181-3067-3156-3248-3684[INC][7/1][UPT]	CA-51181-3067-3156-3248-3684[INC][7/1][UPT]	chr17	82037444	82037450	82037541	51181	DCXR	intron	6	0	0.423305	-0.074313	0.074313
chr17_82037444_A_G	Brain_Anterior_cingulate_cortex_BA24||chr17_82037444_A_G||chr17:82037013:82037631:clu_11108:ENSG00000169738.7	Brain_Anterior_cingulate_cortex_BA24||chr17_82037444_A_G||chr17:82037013:82037631:clu_11108:ENSG00000169738.7||CA-51181-3067-3156-3248-3684[INC][7/1][UPT]	CA-51181-3067-3156-3248-3684[INC][7/1][UPT]	chr17	82037444	82037450	82037541	51181	DCXR	intron	6	0	0.423305	-0.074313	0.074313
chr17_82037444_A_G	Brain_Caudate_basal_ganglia||chr17_82037444_A_G||chr17:82037013:82037631:clu_12608:ENSG00000169738.7	Brain_Caudate_basal_ganglia||chr17_82037444_A_G||chr17:82037013:82037631:clu_12608:ENSG00000169738.7||CA-51181-3067-3156-3248-3684[INC][7/1][UPT]	CA-51181-3067-3156-3248-3684[INC][7/1][UPT]	chr17	82037444	82037450	82037541	51181	DCXR	intron	6	0	0.423305	-0.074313	0.074313
chr17_82037444_A_G	Brain_Cerebellar_Hemisphere||chr17_82037444_A_G||chr17:82037013:82037631:clu_13149:ENSG00000169738.7	Brain_Cerebellar_Hemisphere||chr17_82037444_A_G||chr17:82037013:82037631:clu_13149:ENSG00000169738.7||CA-51181-3067-3156-3248-3684[INC][7/1][UPT]	CA-51181-3067-3156-3248-3684[INC][7/1][UPT]	chr17	82037444	82037450	82037541	51181	DCXR	intron	6	0	0.423305	-0.074313	0.074313
chr17_82037444_A_G	Brain_Cerebellum||chr17_82037444_A_G||chr17:82037013:82037631:clu_13717:ENSG00000169738.7	Brain_Cerebellum||chr17_82037444_A_G||chr17:82037013:82037631:clu_13717:ENSG00000169738.7||CA-51181-3067-3156-3248-3684[INC][7/1][UPT]	CA-51181-3067-3156-3248-3684[INC][7/1][UPT]	chr17	82037444	82037450	82037541	51181	DCXR	intron	6	0	0.423305	-0.074313	0.074313
chr17_82037444_A_G	Brain_Cortex||chr17_82037444_A_G||chr17:82037013:82037631:clu_13013:ENSG00000169738.7	Brain_Cortex||chr17_82037444_A_G||chr17:82037013:82037631:clu_13013:ENSG00000169738.7||CA-51181-3067-3156-3248-3684[INC][7/1][UPT]	CA-51181-3067-3156-3248-3684[INC][7/1][UPT]	chr17	82037444	82037450	82037541	51181	DCXR	intron	6	0	0.423305	-0.074313	0.074313
chr17_82037444_A_G	Brain_Frontal_Cortex_BA9||chr17_82037444_A_G||chr17:82037013:82037631:clu_12048:ENSG00000169738.7	Brain_Frontal_Cortex_BA9||chr17_82037444_A_G||chr17:82037013:82037631:clu_12048:ENSG00000169738.7||CA-51181-3067-3156-3248-3684[INC][7/1][UPT]	CA-51181-3067-3156-3248-3684[INC][7/1][UPT]	chr17	82037444	82037450	82037541	51181	DCXR	intron	6	0	0.423305	-0.074313	0.074313
chr17_82037444_A_G	Brain_Hippocampus||chr17_82037444_A_G||chr17:82037013:82037631:clu_11485:ENSG00000169738.7	Brain_Hippocampus||chr17_82037444_A_G||chr17:82037013:82037631:clu_11485:ENSG00000169738.7||CA-51181-3067-3156-3248-3684[INC][7/1][UPT]	CA-51181-3067-3156-3248-3684[INC][7/1][UPT]	chr17	82037444	82037450	82037541	51181	DCXR	intron	6	0	0.423305	-0.074313	0.074313
chr17_82037444_A_G	Brain_Hypothalamus||chr17_82037444_A_G||chr17:82037013:82037631:clu_12268:ENSG00000169738.7	Brain_Hypothalamus||chr17_82037444_A_G||chr17:82037013:82037631:clu_12268:ENSG00000169738.7||CA-51181-3067-3156-3248-3684[INC][7/1][UPT]	CA-51181-3067-3156-3248-3684[INC][7/1][UPT]	chr17	82037444	82037450	82037541	51181	DCXR	intron	6	0	0.423305	-0.074313	0.074313
chr17_82037444_A_G	Brain_Nucleus_accumbens_basal_ganglia||chr17_82037444_A_G||chr17:82037013:82037631:clu_12865:ENSG00000169738.7	Brain_Nucleus_accumbens_basal_ganglia||chr17_82037444_A_G||chr17:82037013:82037631:clu_12865:ENSG00000169738.7||CA-51181-3067-3156-3248-3684[INC][7/1][UPT]	CA-51181-3067-3156-3248-3684[INC][7/1][UPT]	chr17	82037444	82037450	82037541	51181	DCXR	intron	6	0	0.423305	-0.074313	0.074313
chr17_82037444_A_G	Brain_Putamen_basal_ganglia||chr17_82037444_A_G||chr17:82037013:82037631:clu_11287:ENSG00000169738.7	Brain_Putamen_basal_ganglia||chr17_82037444_A_G||chr17:82037013:82037631:clu_11287:ENSG00000169738.7||CA-51181-3067-3156-3248-3684[INC][7/1][UPT]	CA-51181-3067-3156-3248-3684[INC][7/1][UPT]	chr17	82037444	82037450	82037541	51181	DCXR	intron	6	0	0.423305	-0.074313	0.074313
chr17_82037444_A_G	Brain_Spinal_cord_cervical_c-1||chr17_82037444_A_G||chr17:82037013:82037631:clu_11037:ENSG00000169738.7	Brain_Spinal_cord_cervical_c-1||chr17_82037444_A_G||chr17:82037013:82037631:clu_11037:ENSG00000169738.7||CA-51181-3067-3156-3248-3684[INC][7/1][UPT]	CA-51181-3067-3156-3248-3684[INC][7/1][UPT]	chr17	82037444	82037450	82037541	51181	DCXR	intron	6	0	0.423305	-0.074313	0.074313
chr17_82037444_A_G	Brain_Substantia_nigra||chr17_82037444_A_G||chr17:82037013:82037631:clu_9959:ENSG00000169738.7	Brain_Substantia_nigra||chr17_82037444_A_G||chr17:82037013:82037631:clu_9959:ENSG00000169738.7||CA-51181-3067-3156-3248-3684[INC][7/1][UPT]	CA-51181-3067-3156-3248-3684[INC][7/1][UPT]	chr17	82037444	82037450	82037541	51181	DCXR	intron	6	0	0.423305	-0.074313	0.074313
chr18_50809403_A_G	Brain_Anterior_cingulate_cortex_BA24||chr18_50809403_A_G||chr18:50806850:50819581:clu_19263:ENSG00000134042.12	Brain_Anterior_cingulate_cortex_BA24||chr18_50809403_A_G||chr18:50806850:50819581:clu_19263:ENSG00000134042.12||CA-83876-8804-18980-19083-21534[INC][25/5]	CA-83876-8804-18980-19083-21534[INC][25/5]	chr18	50809403	50809302	50809404	83876	MRO	exon	1	0	0.908595	-0.0738702	0.0738702
chr18_50809403_A_G	Brain_Caudate_basal_ganglia||chr18_50809403_A_G||chr18:50806850:50819581:clu_21744:ENSG00000134042.12	Brain_Caudate_basal_ganglia||chr18_50809403_A_G||chr18:50806850:50819581:clu_21744:ENSG00000134042.12||CA-83876-8804-18980-19083-21534[INC][25/5]	CA-83876-8804-18980-19083-21534[INC][25/5]	chr18	50809403	50809302	50809404	83876	MRO	exon	1	0	0.908595	-0.0738702	0.0738702
chr18_50809403_A_G	Brain_Hypothalamus||chr18_50809403_A_G||chr18:50806850:50819581:clu_21242:ENSG00000134042.12	Brain_Hypothalamus||chr18_50809403_A_G||chr18:50806850:50819581:clu_21242:ENSG00000134042.12||CA-83876-8804-18980-19083-21534[INC][25/5]	CA-83876-8804-18980-19083-21534[INC][25/5]	chr18	50809403	50809302	50809404	83876	MRO	exon	1	0	0.908595	-0.0738702	0.0738702
chr18_50809403_A_G	Brain_Nucleus_accumbens_basal_ganglia||chr18_50809403_A_G||chr18:50806850:50819581:clu_22207:ENSG00000134042.12	Brain_Nucleus_accumbens_basal_ganglia||chr18_50809403_A_G||chr18:50806850:50819581:clu_22207:ENSG00000134042.12||CA-83876-8804-18980-19083-21534[INC][25/5]	CA-83876-8804-18980-19083-21534[INC][25/5]	chr18	50809403	50809302	50809404	83876	MRO	exon	1	0	0.908595	-0.0738702	0.0738702
chr18_50809403_A_G	Brain_Substantia_nigra||chr18_50809403_A_G||chr18:50806850:50819581:clu_17210:ENSG00000134042.12	Brain_Substantia_nigra||chr18_50809403_A_G||chr18:50806850:50819581:clu_17210:ENSG00000134042.12||CA-83876-8804-18980-19083-21534[INC][25/5]	CA-83876-8804-18980-19083-21534[INC][25/5]	chr18	50809403	50809302	50809404	83876	MRO	exon	1	0	0.908595	-0.0738702	0.0738702
chr3_11808333_A_C	Brain_Cerebellum||chr3_11808333_A_C||chr3:11807895:11809517:clu_37128:ENSG00000144559.10	Brain_Cerebellum||chr3_11808333_A_C||chr3:11807895:11809517:clu_37128:ENSG00000144559.10||CA-132001@0-40403-41336-41585-42024[INC][2/45]	CA-132001@0-40403-41336-41585-42024[INC][2/45]	chr3	11808333	11808335	11808583	132001	TAMM41	intron	2	1	0.075113	-0.0736627	0.0736627
chr3_11808333_A_C	Brain_Hypothalamus||chr3_11808333_A_C||chr3:11807895:11809517:clu_32953:ENSG00000144559.10	Brain_Hypothalamus||chr3_11808333_A_C||chr3:11807895:11809517:clu_32953:ENSG00000144559.10||CA-132001@0-40403-41336-41585-42024[INC][2/45]	CA-132001@0-40403-41336-41585-42024[INC][2/45]	chr3	11808333	11808335	11808583	132001	TAMM41	intron	2	1	0.075113	-0.0736627	0.0736627
chr3_11808333_A_C	Brain_Substantia_nigra||chr3_11808333_A_C||chr3:11807895:11809517:clu_26533:ENSG00000144559.10	Brain_Substantia_nigra||chr3_11808333_A_C||chr3:11807895:11809517:clu_26533:ENSG00000144559.10||CA-132001@0-40403-41336-41585-42024[INC][2/45]	CA-132001@0-40403-41336-41585-42024[INC][2/45]	chr3	11808333	11808335	11808583	132001	TAMM41	intron	2	1	0.075113	-0.0736627	0.0736627
chr1_46309111_A_G	Brain_Amygdala||chr1_46309111_A_G||chr1:46303820:46310155:clu_33957:ENSG00000173660.11	Brain_Amygdala||chr1_46309111_A_G||chr1:46303820:46310155:clu_33957:ENSG00000173660.11||CA-7388-3208-8488-8531-9542[INC][2/13][UPT]	CA-7388-3208-8488-8531-9542[INC][2/13][UPT]	chr1	46309111	46309101	46309143	7388	UQCRH	exon	10	0	0.497717	-0.0736327	0.0736327
chr1_46309111_A_G	Brain_Anterior_cingulate_cortex_BA24||chr1_46309111_A_G||chr1:46303820:46310155:clu_36673:ENSG00000173660.11	Brain_Anterior_cingulate_cortex_BA24||chr1_46309111_A_G||chr1:46303820:46310155:clu_36673:ENSG00000173660.11||CA-7388-3208-8488-8531-9542[INC][2/13][UPT]	CA-7388-3208-8488-8531-9542[INC][2/13][UPT]	chr1	46309111	46309101	46309143	7388	UQCRH	exon	10	0	0.497717	-0.0736327	0.0736327
chr1_46309111_A_G	Brain_Caudate_basal_ganglia||chr1_46309111_A_G||chr1:46303820:46310155:clu_41561:ENSG00000173660.11	Brain_Caudate_basal_ganglia||chr1_46309111_A_G||chr1:46303820:46310155:clu_41561:ENSG00000173660.11||CA-7388-3208-8488-8531-9542[INC][2/13][UPT]	CA-7388-3208-8488-8531-9542[INC][2/13][UPT]	chr1	46309111	46309101	46309143	7388	UQCRH	exon	10	0	0.497717	-0.0736327	0.0736327
chr1_46309111_A_G	Brain_Cerebellar_Hemisphere||chr1_46309111_A_G||chr1:46303820:46310155:clu_43341:ENSG00000173660.11	Brain_Cerebellar_Hemisphere||chr1_46309111_A_G||chr1:46303820:46310155:clu_43341:ENSG00000173660.11||CA-7388-3208-8488-8531-9542[INC][2/13][UPT]	CA-7388-3208-8488-8531-9542[INC][2/13][UPT]	chr1	46309111	46309101	46309143	7388	UQCRH	exon	10	0	0.497717	-0.0736327	0.0736327
chr1_46309111_A_G	Brain_Cerebellum||chr1_46309111_A_G||chr1:46303820:46310155:clu_45584:ENSG00000173660.11	Brain_Cerebellum||chr1_46309111_A_G||chr1:46303820:46310155:clu_45584:ENSG00000173660.11||CA-7388-3208-8488-8531-9542[INC][2/13][UPT]	CA-7388-3208-8488-8531-9542[INC][2/13][UPT]	chr1	46309111	46309101	46309143	7388	UQCRH	exon	10	0	0.497717	-0.0736327	0.0736327
chr1_46309111_A_G	Brain_Cortex||chr1_46309111_A_G||chr1:46303820:46310155:clu_42717:ENSG00000173660.11	Brain_Cortex||chr1_46309111_A_G||chr1:46303820:46310155:clu_42717:ENSG00000173660.11||CA-7388-3208-8488-8531-9542[INC][2/13][UPT]	CA-7388-3208-8488-8531-9542[INC][2/13][UPT]	chr1	46309111	46309101	46309143	7388	UQCRH	exon	10	0	0.497717	-0.0736327	0.0736327
chr1_46309111_A_G	Brain_Frontal_Cortex_BA9||chr1_46309111_A_G||chr1:46303820:46310155:clu_39737:ENSG00000173660.11	Brain_Frontal_Cortex_BA9||chr1_46309111_A_G||chr1:46303820:46310155:clu_39737:ENSG00000173660.11||CA-7388-3208-8488-8531-9542[INC][2/13][UPT]	CA-7388-3208-8488-8531-9542[INC][2/13][UPT]	chr1	46309111	46309101	46309143	7388	UQCRH	exon	10	0	0.497717	-0.0736327	0.0736327
chr1_46309111_A_G	Brain_Hippocampus||chr1_46309111_A_G||chr1:46303820:46310155:clu_37774:ENSG00000173660.11	Brain_Hippocampus||chr1_46309111_A_G||chr1:46303820:46310155:clu_37774:ENSG00000173660.11||CA-7388-3208-8488-8531-9542[INC][2/13][UPT]	CA-7388-3208-8488-8531-9542[INC][2/13][UPT]	chr1	46309111	46309101	46309143	7388	UQCRH	exon	10	0	0.497717	-0.0736327	0.0736327
chr1_46309111_A_G	Brain_Hypothalamus||chr1_46309111_A_G||chr1:46303820:46310155:clu_40545:ENSG00000173660.11	Brain_Hypothalamus||chr1_46309111_A_G||chr1:46303820:46310155:clu_40545:ENSG00000173660.11||CA-7388-3208-8488-8531-9542[INC][2/13][UPT]	CA-7388-3208-8488-8531-9542[INC][2/13][UPT]	chr1	46309111	46309101	46309143	7388	UQCRH	exon	10	0	0.497717	-0.0736327	0.0736327
chr1_46309111_A_G	Brain_Nucleus_accumbens_basal_ganglia||chr1_46309111_A_G||chr1:46303820:46310155:clu_42555:ENSG00000173660.11	Brain_Nucleus_accumbens_basal_ganglia||chr1_46309111_A_G||chr1:46303820:46310155:clu_42555:ENSG00000173660.11||CA-7388-3208-8488-8531-9542[INC][2/13][UPT]	CA-7388-3208-8488-8531-9542[INC][2/13][UPT]	chr1	46309111	46309101	46309143	7388	UQCRH	exon	10	0	0.497717	-0.0736327	0.0736327
chr1_46309111_A_G	Brain_Putamen_basal_ganglia||chr1_46309111_A_G||chr1:46303820:46310155:clu_37063:ENSG00000173660.11	Brain_Putamen_basal_ganglia||chr1_46309111_A_G||chr1:46303820:46310155:clu_37063:ENSG00000173660.11||CA-7388-3208-8488-8531-9542[INC][2/13][UPT]	CA-7388-3208-8488-8531-9542[INC][2/13][UPT]	chr1	46309111	46309101	46309143	7388	UQCRH	exon	10	0	0.497717	-0.0736327	0.0736327
chr1_46309111_A_G	Brain_Spinal_cord_cervical_c-1||chr1_46309111_A_G||chr1:46303820:46310155:clu_36117:ENSG00000173660.11	Brain_Spinal_cord_cervical_c-1||chr1_46309111_A_G||chr1:46303820:46310155:clu_36117:ENSG00000173660.11||CA-7388-3208-8488-8531-9542[INC][2/13][UPT]	CA-7388-3208-8488-8531-9542[INC][2/13][UPT]	chr1	46309111	46309101	46309143	7388	UQCRH	exon	10	0	0.497717	-0.0736327	0.0736327
chr1_46309111_A_G	Brain_Substantia_nigra||chr1_46309111_A_G||chr1:46303820:46310155:clu_32519:ENSG00000173660.11	Brain_Substantia_nigra||chr1_46309111_A_G||chr1:46303820:46310155:clu_32519:ENSG00000173660.11||CA-7388-3208-8488-8531-9542[INC][2/13][UPT]	CA-7388-3208-8488-8531-9542[INC][2/13][UPT]	chr1	46309111	46309101	46309143	7388	UQCRH	exon	10	0	0.497717	-0.0736327	0.0736327
chr2_224919_A_G	Brain_Anterior_cingulate_cortex_BA24||chr2_224919_A_G||chr2:219001:229966:clu_32160:ENSG00000035115.21	Brain_Anterior_cingulate_cortex_BA24||chr2_224919_A_G||chr2:219001:229966:clu_32160:ENSG00000035115.21||CA-26751-37901-42946-43003-48865[INC][17/34][DNT]	CA-26751-37901-42946-43003-48865[INC][17/34][DNT]	chr2	224919	224864	224920	26751	SH3YL1	exon	1	0	0.404985	-0.0734787	0.0734787
chr2_224919_A_G	Brain_Caudate_basal_ganglia||chr2_224919_A_G||chr2:219001:229966:clu_36438:ENSG00000035115.21	Brain_Caudate_basal_ganglia||chr2_224919_A_G||chr2:219001:229966:clu_36438:ENSG00000035115.21||CA-26751-37901-42946-43003-48865[INC][17/34][DNT]	CA-26751-37901-42946-43003-48865[INC][17/34][DNT]	chr2	224919	224864	224920	26751	SH3YL1	exon	1	0	0.404985	-0.0734787	0.0734787
chr2_224919_A_G	Brain_Cerebellar_Hemisphere||chr2_224919_A_G||chr2:219001:229966:clu_38081:ENSG00000035115.21	Brain_Cerebellar_Hemisphere||chr2_224919_A_G||chr2:219001:229966:clu_38081:ENSG00000035115.21||CA-26751-37901-42946-43003-48865[INC][17/34][DNT]	CA-26751-37901-42946-43003-48865[INC][17/34][DNT]	chr2	224919	224864	224920	26751	SH3YL1	exon	1	0	0.404985	-0.0734787	0.0734787
chr2_224919_A_G	Brain_Cerebellum||chr2_224919_A_G||chr2:219001:229966:clu_40009:ENSG00000035115.21	Brain_Cerebellum||chr2_224919_A_G||chr2:219001:229966:clu_40009:ENSG00000035115.21||CA-26751-37901-42946-43003-48865[INC][17/34][DNT]	CA-26751-37901-42946-43003-48865[INC][17/34][DNT]	chr2	224919	224864	224920	26751	SH3YL1	exon	1	0	0.404985	-0.0734787	0.0734787
chr2_224919_A_G	Brain_Cortex||chr2_224919_A_G||chr2:219001:229966:clu_37466:ENSG00000035115.21	Brain_Cortex||chr2_224919_A_G||chr2:219001:229966:clu_37466:ENSG00000035115.21||CA-26751-37901-42946-43003-48865[INC][17/34][DNT]	CA-26751-37901-42946-43003-48865[INC][17/34][DNT]	chr2	224919	224864	224920	26751	SH3YL1	exon	1	0	0.404985	-0.0734787	0.0734787
chr2_224919_A_G	Brain_Frontal_Cortex_BA9||chr2_224919_A_G||chr2:219001:229966:clu_34882:ENSG00000035115.21	Brain_Frontal_Cortex_BA9||chr2_224919_A_G||chr2:219001:229966:clu_34882:ENSG00000035115.21||CA-26751-37901-42946-43003-48865[INC][17/34][DNT]	CA-26751-37901-42946-43003-48865[INC][17/34][DNT]	chr2	224919	224864	224920	26751	SH3YL1	exon	1	0	0.404985	-0.0734787	0.0734787
chr2_224919_A_G	Brain_Nucleus_accumbens_basal_ganglia||chr2_224919_A_G||chr2:219001:229966:clu_37302:ENSG00000035115.21	Brain_Nucleus_accumbens_basal_ganglia||chr2_224919_A_G||chr2:219001:229966:clu_37302:ENSG00000035115.21||CA-26751-37901-42946-43003-48865[INC][17/34][DNT]	CA-26751-37901-42946-43003-48865[INC][17/34][DNT]	chr2	224919	224864	224920	26751	SH3YL1	exon	1	0	0.404985	-0.0734787	0.0734787
chr2_224919_A_G	Brain_Spinal_cord_cervical_c-1||chr2_224919_A_G||chr2:219001:229966:clu_31707:ENSG00000035115.21	Brain_Spinal_cord_cervical_c-1||chr2_224919_A_G||chr2:219001:229966:clu_31707:ENSG00000035115.21||CA-26751-37901-42946-43003-48865[INC][17/34][DNT]	CA-26751-37901-42946-43003-48865[INC][17/34][DNT]	chr2	224919	224864	224920	26751	SH3YL1	exon	1	0	0.404985	-0.0734787	0.0734787
chr20_46398725_C_T	Brain_Cerebellar_Hemisphere||chr20_46398725_C_T||chr20:46394532:46406548:clu_25531:ENSG00000062598.17	Brain_Cerebellar_Hemisphere||chr20_46398725_C_T||chr20:46394532:46406548:clu_25531:ENSG00000062598.17||CA-63916-3504-11280-11355-15519[INC][92/61][UPT]	CA-63916-3504-11280-11355-15519[INC][92/61][UPT]	chr20	46398725	46398697	46398771	63916	ELMO2	exon	28	0	0.626169	-0.0727484	0.0727484
chr20_46398725_C_T	Brain_Cerebellar_Hemisphere||chr20_46398725_C_T||chr20:46394532:46406548:clu_25531:ENSG00000215452.4	Brain_Cerebellar_Hemisphere||chr20_46398725_C_T||chr20:46394532:46406548:clu_25531:ENSG00000215452.4||CA-63916-3504-11280-11355-15519[INC][92/61][UPT]	CA-63916-3504-11280-11355-15519[INC][92/61][UPT]	chr20	46398725	46398697	46398771	63916	ELMO2	exon	28	0	0.626169	-0.0727484	0.0727484
chr20_46398725_C_T	Brain_Cortex||chr20_46398725_C_T||chr20:46394532:46406548:clu_24884:ENSG00000062598.17	Brain_Cortex||chr20_46398725_C_T||chr20:46394532:46406548:clu_24884:ENSG00000062598.17||CA-63916-3504-11280-11355-15519[INC][92/61][UPT]	CA-63916-3504-11280-11355-15519[INC][92/61][UPT]	chr20	46398725	46398697	46398771	63916	ELMO2	exon	28	0	0.626169	-0.0727484	0.0727484
chr2_24167648_G_A	Brain_Amygdala||chr2_24167648_G_A||chr2:24164335:24169356:clu_29985:ENSG00000219626.8	Brain_Amygdala||chr2_24167648_G_A||chr2:24164335:24169356:clu_29985:ENSG00000219626.8||CA-375190-90462-93753-93810-95482[INC][22/11][DNT]	CA-375190-90462-93753-93810-95482[INC][22/11][DNT]	chr2	24167648	24167627	24167683	375190	LOC375190	exon	21	0	0.604561	0.0723476	0.0723476
chr2_24167648_G_A	Brain_Amygdala||chr2_24167648_G_A||chr2:24164335:24169356:clu_29985:ENSG00000186453.12	Brain_Amygdala||chr2_24167648_G_A||chr2:24164335:24169356:clu_29985:ENSG00000186453.12||CA-375190-90462-93753-93810-95482[INC][22/11][DNT]	CA-375190-90462-93753-93810-95482[INC][22/11][DNT]	chr2	24167648	24167627	24167683	375190	LOC375190	exon	21	0	0.604561	0.0723476	0.0723476
chr2_24167648_G_A	Brain_Anterior_cingulate_cortex_BA24||chr2_24167648_G_A||chr2:24164335:24169356:clu_32382:ENSG00000219626.8	Brain_Anterior_cingulate_cortex_BA24||chr2_24167648_G_A||chr2:24164335:24169356:clu_32382:ENSG00000219626.8||CA-375190-90462-93753-93810-95482[INC][22/11][DNT]	CA-375190-90462-93753-93810-95482[INC][22/11][DNT]	chr2	24167648	24167627	24167683	375190	LOC375190	exon	21	0	0.604561	0.0723476	0.0723476
chr2_24167648_G_A	Brain_Anterior_cingulate_cortex_BA24||chr2_24167648_G_A||chr2:24164335:24169356:clu_32382:ENSG00000186453.12	Brain_Anterior_cingulate_cortex_BA24||chr2_24167648_G_A||chr2:24164335:24169356:clu_32382:ENSG00000186453.12||CA-375190-90462-93753-93810-95482[INC][22/11][DNT]	CA-375190-90462-93753-93810-95482[INC][22/11][DNT]	chr2	24167648	24167627	24167683	375190	LOC375190	exon	21	0	0.604561	0.0723476	0.0723476
chr2_24167648_G_A	Brain_Caudate_basal_ganglia||chr2_24167648_G_A||chr2:24164335:24169356:clu_36691:ENSG00000219626.8	Brain_Caudate_basal_ganglia||chr2_24167648_G_A||chr2:24164335:24169356:clu_36691:ENSG00000219626.8||CA-375190-90462-93753-93810-95482[INC][22/11][DNT]	CA-375190-90462-93753-93810-95482[INC][22/11][DNT]	chr2	24167648	24167627	24167683	375190	LOC375190	exon	21	0	0.604561	0.0723476	0.0723476
chr2_24167648_G_A	Brain_Cerebellar_Hemisphere||chr2_24167648_G_A||chr2:24164335:24169356:clu_38318:ENSG00000219626.8	Brain_Cerebellar_Hemisphere||chr2_24167648_G_A||chr2:24164335:24169356:clu_38318:ENSG00000219626.8||CA-375190-90462-93753-93810-95482[INC][22/11][DNT]	CA-375190-90462-93753-93810-95482[INC][22/11][DNT]	chr2	24167648	24167627	24167683	375190	LOC375190	exon	21	0	0.604561	0.0723476	0.0723476
chr2_24167648_G_A	Brain_Cerebellum||chr2_24167648_G_A||chr2:24164335:24169356:clu_40277:ENSG00000219626.8	Brain_Cerebellum||chr2_24167648_G_A||chr2:24164335:24169356:clu_40277:ENSG00000219626.8||CA-375190-90462-93753-93810-95482[INC][22/11][DNT]	CA-375190-90462-93753-93810-95482[INC][22/11][DNT]	chr2	24167648	24167627	24167683	375190	LOC375190	exon	21	0	0.604561	0.0723476	0.0723476
chr2_24167648_G_A	Brain_Cortex||chr2_24167648_G_A||chr2:24164335:24169356:clu_37741:ENSG00000219626.8	Brain_Cortex||chr2_24167648_G_A||chr2:24164335:24169356:clu_37741:ENSG00000219626.8||CA-375190-90462-93753-93810-95482[INC][22/11][DNT]	CA-375190-90462-93753-93810-95482[INC][22/11][DNT]	chr2	24167648	24167627	24167683	375190	LOC375190	exon	21	0	0.604561	0.0723476	0.0723476
chr2_24167648_G_A	Brain_Cortex||chr2_24167648_G_A||chr2:24164335:24169356:clu_37741:ENSG00000186453.12	Brain_Cortex||chr2_24167648_G_A||chr2:24164335:24169356:clu_37741:ENSG00000186453.12||CA-375190-90462-93753-93810-95482[INC][22/11][DNT]	CA-375190-90462-93753-93810-95482[INC][22/11][DNT]	chr2	24167648	24167627	24167683	375190	LOC375190	exon	21	0	0.604561	0.0723476	0.0723476
chr2_24167648_G_A	Brain_Frontal_Cortex_BA9||chr2_24167648_G_A||chr2:24164335:24169356:clu_35137:ENSG00000219626.8	Brain_Frontal_Cortex_BA9||chr2_24167648_G_A||chr2:24164335:24169356:clu_35137:ENSG00000219626.8||CA-375190-90462-93753-93810-95482[INC][22/11][DNT]	CA-375190-90462-93753-93810-95482[INC][22/11][DNT]	chr2	24167648	24167627	24167683	375190	LOC375190	exon	21	0	0.604561	0.0723476	0.0723476
chr2_24167648_G_A	Brain_Frontal_Cortex_BA9||chr2_24167648_G_A||chr2:24164335:24169356:clu_35137:ENSG00000186453.12	Brain_Frontal_Cortex_BA9||chr2_24167648_G_A||chr2:24164335:24169356:clu_35137:ENSG00000186453.12||CA-375190-90462-93753-93810-95482[INC][22/11][DNT]	CA-375190-90462-93753-93810-95482[INC][22/11][DNT]	chr2	24167648	24167627	24167683	375190	LOC375190	exon	21	0	0.604561	0.0723476	0.0723476
chr2_24167648_G_A	Brain_Hippocampus||chr2_24167648_G_A||chr2:24164335:24169356:clu_33318:ENSG00000219626.8	Brain_Hippocampus||chr2_24167648_G_A||chr2:24164335:24169356:clu_33318:ENSG00000219626.8||CA-375190-90462-93753-93810-95482[INC][22/11][DNT]	CA-375190-90462-93753-93810-95482[INC][22/11][DNT]	chr2	24167648	24167627	24167683	375190	LOC375190	exon	21	0	0.604561	0.0723476	0.0723476
chr2_24167648_G_A	Brain_Hypothalamus||chr2_24167648_G_A||chr2:24164335:24169356:clu_35790:ENSG00000219626.8	Brain_Hypothalamus||chr2_24167648_G_A||chr2:24164335:24169356:clu_35790:ENSG00000219626.8||CA-375190-90462-93753-93810-95482[INC][22/11][DNT]	CA-375190-90462-93753-93810-95482[INC][22/11][DNT]	chr2	24167648	24167627	24167683	375190	LOC375190	exon	21	0	0.604561	0.0723476	0.0723476
chr2_24167648_G_A	Brain_Nucleus_accumbens_basal_ganglia||chr2_24167648_G_A||chr2:24164335:24169356:clu_37588:ENSG00000219626.8	Brain_Nucleus_accumbens_basal_ganglia||chr2_24167648_G_A||chr2:24164335:24169356:clu_37588:ENSG00000219626.8||CA-375190-90462-93753-93810-95482[INC][22/11][DNT]	CA-375190-90462-93753-93810-95482[INC][22/11][DNT]	chr2	24167648	24167627	24167683	375190	LOC375190	exon	21	0	0.604561	0.0723476	0.0723476
chr2_24167648_G_A	Brain_Putamen_basal_ganglia||chr2_24167648_G_A||chr2:24164335:24169356:clu_32727:ENSG00000219626.8	Brain_Putamen_basal_ganglia||chr2_24167648_G_A||chr2:24164335:24169356:clu_32727:ENSG00000219626.8||CA-375190-90462-93753-93810-95482[INC][22/11][DNT]	CA-375190-90462-93753-93810-95482[INC][22/11][DNT]	chr2	24167648	24167627	24167683	375190	LOC375190	exon	21	0	0.604561	0.0723476	0.0723476
chr2_24167648_G_A	Brain_Spinal_cord_cervical_c-1||chr2_24167648_G_A||chr2:24164335:24169356:clu_31898:ENSG00000219626.8	Brain_Spinal_cord_cervical_c-1||chr2_24167648_G_A||chr2:24164335:24169356:clu_31898:ENSG00000219626.8||CA-375190-90462-93753-93810-95482[INC][22/11][DNT]	CA-375190-90462-93753-93810-95482[INC][22/11][DNT]	chr2	24167648	24167627	24167683	375190	LOC375190	exon	21	0	0.604561	0.0723476	0.0723476
chr2_24167648_G_A	Brain_Substantia_nigra||chr2_24167648_G_A||chr2:24164335:24169356:clu_28746:ENSG00000219626.8	Brain_Substantia_nigra||chr2_24167648_G_A||chr2:24164335:24169356:clu_28746:ENSG00000219626.8||CA-375190-90462-93753-93810-95482[INC][22/11][DNT]	CA-375190-90462-93753-93810-95482[INC][22/11][DNT]	chr2	24167648	24167627	24167683	375190	LOC375190	exon	21	0	0.604561	0.0723476	0.0723476
chr2_24167648_G_A	Brain_Substantia_nigra||chr2_24167648_G_A||chr2:24164335:24169356:clu_28746:ENSG00000186453.12	Brain_Substantia_nigra||chr2_24167648_G_A||chr2:24164335:24169356:clu_28746:ENSG00000186453.12||CA-375190-90462-93753-93810-95482[INC][22/11][DNT]	CA-375190-90462-93753-93810-95482[INC][22/11][DNT]	chr2	24167648	24167627	24167683	375190	LOC375190	exon	21	0	0.604561	0.0723476	0.0723476
chr12_4607347_C_T	Brain_Cerebellum||chr12_4607347_C_T||chr12:4605086:4610155:clu_2679:ENSG00000010219.13	Brain_Cerebellum||chr12_4607347_C_T||chr12:4605086:4610155:clu_2679:ENSG00000010219.13||CA-8798-18015-20255-20316-23083[INC][37/27]	CA-8798-18015-20255-20316-23083[INC][37/27]	chr12	4607347	4607327	4607387	8798	DYRK4	exon	20	0	0.725039	-0.0723398	0.0723398
chr8_98193384_C_T	Brain_Caudate_basal_ganglia||chr8_98193384_C_T||chr8:98193090:98194728:clu_47775:ENSG00000104361.9	Brain_Caudate_basal_ganglia||chr8_98193384_C_T||chr8:98193090:98194728:clu_47775:ENSG00000104361.9||CA-79815-102666-103981-104009-104303[INC][2/15][DNT]	CA-79815-102666-103981-104009-104303[INC][2/15][DNT]	chr8	98193384	98193385	98193412	79815	NIPAL2	intron	1	1	0.073501	-0.0719984	0.0719984
chr8_98193384_C_T	Brain_Nucleus_accumbens_basal_ganglia||chr8_98193384_C_T||chr8:98193090:98194728:clu_48876:ENSG00000104361.9	Brain_Nucleus_accumbens_basal_ganglia||chr8_98193384_C_T||chr8:98193090:98194728:clu_48876:ENSG00000104361.9||CA-79815-102666-103981-104009-104303[INC][2/15][DNT]	CA-79815-102666-103981-104009-104303[INC][2/15][DNT]	chr8	98193384	98193385	98193412	79815	NIPAL2	intron	1	1	0.073501	-0.0719984	0.0719984
chr19_13109889_C_G	Brain_Amygdala||chr19_13109889_C_G||chr19:13109838:13110158:clu_15736:ENSG00000104907.12	Brain_Amygdala||chr19_13109889_C_G||chr19:13109838:13110158:clu_15736:ENSG00000104907.12||CA-55621-9614-9770-9857-9933[INC][25/11]	CA-55621-9614-9770-9857-9933[INC][25/11]	chr19	13109889	13109915	13110001	55621	TRMT1	intron	26	0	0.814607	-0.0718687	0.0718687
chr19_13109889_C_G	Brain_Anterior_cingulate_cortex_BA24||chr19_13109889_C_G||chr19:13109838:13110158:clu_16924:ENSG00000104907.12	Brain_Anterior_cingulate_cortex_BA24||chr19_13109889_C_G||chr19:13109838:13110158:clu_16924:ENSG00000104907.12||CA-55621-9614-9770-9857-9933[INC][25/11]	CA-55621-9614-9770-9857-9933[INC][25/11]	chr19	13109889	13109915	13110001	55621	TRMT1	intron	26	0	0.814607	-0.0718687	0.0718687
chr19_13109889_C_G	Brain_Caudate_basal_ganglia||chr19_13109889_C_G||chr19:13109838:13110158:clu_19167:ENSG00000104907.12	Brain_Caudate_basal_ganglia||chr19_13109889_C_G||chr19:13109838:13110158:clu_19167:ENSG00000104907.12||CA-55621-9614-9770-9857-9933[INC][25/11]	CA-55621-9614-9770-9857-9933[INC][25/11]	chr19	13109889	13109915	13110001	55621	TRMT1	intron	26	0	0.814607	-0.0718687	0.0718687
chr19_13109889_C_G	Brain_Cerebellar_Hemisphere||chr19_13109889_C_G||chr19:13109838:13110158:clu_20345:ENSG00000104907.12	Brain_Cerebellar_Hemisphere||chr19_13109889_C_G||chr19:13109838:13110158:clu_20345:ENSG00000104907.12||CA-55621-9614-9770-9857-9933[INC][25/11]	CA-55621-9614-9770-9857-9933[INC][25/11]	chr19	13109889	13109915	13110001	55621	TRMT1	intron	26	0	0.814607	-0.0718687	0.0718687
chr19_13109889_C_G	Brain_Cerebellum||chr19_13109889_C_G||chr19:13109838:13110158:clu_21299:ENSG00000104907.12	Brain_Cerebellum||chr19_13109889_C_G||chr19:13109838:13110158:clu_21299:ENSG00000104907.12||CA-55621-9614-9770-9857-9933[INC][25/11]	CA-55621-9614-9770-9857-9933[INC][25/11]	chr19	13109889	13109915	13110001	55621	TRMT1	intron	26	0	0.814607	-0.0718687	0.0718687
chr19_13109889_C_G	Brain_Cortex||chr19_13109889_C_G||chr19:13109838:13110158:clu_19740:ENSG00000104907.12	Brain_Cortex||chr19_13109889_C_G||chr19:13109838:13110158:clu_19740:ENSG00000104907.12||CA-55621-9614-9770-9857-9933[INC][25/11]	CA-55621-9614-9770-9857-9933[INC][25/11]	chr19	13109889	13109915	13110001	55621	TRMT1	intron	26	0	0.814607	-0.0718687	0.0718687
chr19_13109889_C_G	Brain_Frontal_Cortex_BA9||chr19_13109889_C_G||chr19:13109838:13110158:clu_18291:ENSG00000104907.12	Brain_Frontal_Cortex_BA9||chr19_13109889_C_G||chr19:13109838:13110158:clu_18291:ENSG00000104907.12||CA-55621-9614-9770-9857-9933[INC][25/11]	CA-55621-9614-9770-9857-9933[INC][25/11]	chr19	13109889	13109915	13110001	55621	TRMT1	intron	26	0	0.814607	-0.0718687	0.0718687
chr19_13109889_C_G	Brain_Hippocampus||chr19_13109889_C_G||chr19:13109838:13110158:clu_17470:ENSG00000104907.12	Brain_Hippocampus||chr19_13109889_C_G||chr19:13109838:13110158:clu_17470:ENSG00000104907.12||CA-55621-9614-9770-9857-9933[INC][25/11]	CA-55621-9614-9770-9857-9933[INC][25/11]	chr19	13109889	13109915	13110001	55621	TRMT1	intron	26	0	0.814607	-0.0718687	0.0718687
chr19_13109889_C_G	Brain_Hypothalamus||chr19_13109889_C_G||chr19:13109838:13110158:clu_18710:ENSG00000104907.12	Brain_Hypothalamus||chr19_13109889_C_G||chr19:13109838:13110158:clu_18710:ENSG00000104907.12||CA-55621-9614-9770-9857-9933[INC][25/11]	CA-55621-9614-9770-9857-9933[INC][25/11]	chr19	13109889	13109915	13110001	55621	TRMT1	intron	26	0	0.814607	-0.0718687	0.0718687
chr19_13109889_C_G	Brain_Nucleus_accumbens_basal_ganglia||chr19_13109889_C_G||chr19:13109838:13110158:clu_19565:ENSG00000104907.12	Brain_Nucleus_accumbens_basal_ganglia||chr19_13109889_C_G||chr19:13109838:13110158:clu_19565:ENSG00000104907.12||CA-55621-9614-9770-9857-9933[INC][25/11]	CA-55621-9614-9770-9857-9933[INC][25/11]	chr19	13109889	13109915	13110001	55621	TRMT1	intron	26	0	0.814607	-0.0718687	0.0718687
chr19_13109889_C_G	Brain_Putamen_basal_ganglia||chr19_13109889_C_G||chr19:13109838:13110158:clu_17160:ENSG00000104907.12	Brain_Putamen_basal_ganglia||chr19_13109889_C_G||chr19:13109838:13110158:clu_17160:ENSG00000104907.12||CA-55621-9614-9770-9857-9933[INC][25/11]	CA-55621-9614-9770-9857-9933[INC][25/11]	chr19	13109889	13109915	13110001	55621	TRMT1	intron	26	0	0.814607	-0.0718687	0.0718687
chr19_13109889_C_G	Brain_Spinal_cord_cervical_c-1||chr19_13109889_C_G||chr19:13109838:13110158:clu_16739:ENSG00000104907.12	Brain_Spinal_cord_cervical_c-1||chr19_13109889_C_G||chr19:13109838:13110158:clu_16739:ENSG00000104907.12||CA-55621-9614-9770-9857-9933[INC][25/11]	CA-55621-9614-9770-9857-9933[INC][25/11]	chr19	13109889	13109915	13110001	55621	TRMT1	intron	26	0	0.814607	-0.0718687	0.0718687
chr19_13109889_C_G	Brain_Substantia_nigra||chr19_13109889_C_G||chr19:13109838:13110158:clu_15095:ENSG00000104907.12	Brain_Substantia_nigra||chr19_13109889_C_G||chr19:13109838:13110158:clu_15095:ENSG00000104907.12||CA-55621-9614-9770-9857-9933[INC][25/11]	CA-55621-9614-9770-9857-9933[INC][25/11]	chr19	13109889	13109915	13110001	55621	TRMT1	intron	26	0	0.814607	-0.0718687	0.0718687
chr7_98860365_T_C	Brain_Anterior_cingulate_cortex_BA24||chr7_98860365_T_C||chr7:98856183:98869777:clu_23344:ENSG00000166448.14	Brain_Anterior_cingulate_cortex_BA24||chr7_98860365_T_C||chr7:98856183:98869777:clu_23344:ENSG00000166448.14||CA-222865-3274-12712-12872-16867[INC][13/2][UPT]	CA-222865-3274-12712-12872-16867[INC][13/2][UPT]	chr7	98860365	98860179	98860338	222865	TMEM130	intron	27	0	0.977883	-0.0712401	0.0712401
chr7_98860365_T_C	Brain_Cortex||chr7_98860365_T_C||chr7:98856183:98869777:clu_27167:ENSG00000166448.14	Brain_Cortex||chr7_98860365_T_C||chr7:98856183:98869777:clu_27167:ENSG00000166448.14||CA-222865-3274-12712-12872-16867[INC][13/2][UPT]	CA-222865-3274-12712-12872-16867[INC][13/2][UPT]	chr7	98860365	98860179	98860338	222865	TMEM130	intron	27	0	0.977883	-0.0712401	0.0712401
chr8_74004849_A_G	Brain_Putamen_basal_ganglia||chr8_74004849_A_G||chr8:73991554:74010001:clu_42383:ENSG00000154589.6	Brain_Putamen_basal_ganglia||chr8_74004849_A_G||chr8:73991554:74010001:clu_42383:ENSG00000154589.6||CA-23643-3226-16467-16557-21672[INC][16/2][UPT]	CA-23643-3226-16467-16557-21672[INC][16/2][UPT]	chr8	74004849	74004796	74004885	23643	LY96	exon	36	0	0.697127	0.0709919	0.0709919
chr3_58131937_G_A	Brain_Caudate_basal_ganglia||chr3_58131937_G_A||chr3:58130908:58132808:clu_34853:ENSG00000136068.14	Brain_Caudate_basal_ganglia||chr3_58131937_G_A||chr3:58130908:58132808:clu_34853:ENSG00000136068.14||CA-2317-125509-126527-126620-127408[INC][5/32]	CA-2317-125509-126527-126620-127408[INC][5/32]	chr3	58131937	58131927	58132019	2317	FLNB	exon	10	0	0.136661	-0.0707655	0.0707655
chr3_58131937_G_A	Brain_Cerebellum||chr3_58131937_G_A||chr3:58130908:58132808:clu_38386:ENSG00000136068.14	Brain_Cerebellum||chr3_58131937_G_A||chr3:58130908:58132808:clu_38386:ENSG00000136068.14||CA-2317-125509-126527-126620-127408[INC][5/32]	CA-2317-125509-126527-126620-127408[INC][5/32]	chr3	58131937	58131927	58132019	2317	FLNB	exon	10	0	0.136661	-0.0707655	0.0707655
chr3_58131937_G_A	Brain_Cortex||chr3_58131937_G_A||chr3:58130908:58132808:clu_35861:ENSG00000136068.14	Brain_Cortex||chr3_58131937_G_A||chr3:58130908:58132808:clu_35861:ENSG00000136068.14||CA-2317-125509-126527-126620-127408[INC][5/32]	CA-2317-125509-126527-126620-127408[INC][5/32]	chr3	58131937	58131927	58132019	2317	FLNB	exon	10	0	0.136661	-0.0707655	0.0707655
chr3_58131937_G_A	Brain_Hippocampus||chr3_58131937_G_A||chr3:58130908:58132808:clu_31670:ENSG00000136068.14	Brain_Hippocampus||chr3_58131937_G_A||chr3:58130908:58132808:clu_31670:ENSG00000136068.14||CA-2317-125509-126527-126620-127408[INC][5/32]	CA-2317-125509-126527-126620-127408[INC][5/32]	chr3	58131937	58131927	58132019	2317	FLNB	exon	10	0	0.136661	-0.0707655	0.0707655
chr3_58131937_G_A	Brain_Spinal_cord_cervical_c-1||chr3_58131937_G_A||chr3:58130908:58132808:clu_30375:ENSG00000136068.14	Brain_Spinal_cord_cervical_c-1||chr3_58131937_G_A||chr3:58130908:58132808:clu_30375:ENSG00000136068.14||CA-2317-125509-126527-126620-127408[INC][5/32]	CA-2317-125509-126527-126620-127408[INC][5/32]	chr3	58131937	58131927	58132019	2317	FLNB	exon	10	0	0.136661	-0.0707655	0.0707655
chr10_59327675_G_A	Brain_Amygdala||chr10_59327675_G_A||chr10:59324106:59352270:clu_6831:ENSG00000148541.12	Brain_Amygdala||chr10_59327675_G_A||chr10:59324106:59352270:clu_6831:ENSG00000148541.12||CA-220965-13912-38468-38557-42075[INC][6/60]	CA-220965-13912-38468-38557-42075[INC][6/60]	chr10	59327675	59327625	59327713	220965	FAM13C	exon	38	0	0.0754467	-0.070375	0.070375
chr14_24065707_G_T	Brain_Cerebellum||chr14_24065707_G_T||chr14:24065273:24066398:clu_18671:ENSG00000186648.14	Brain_Cerebellum||chr14_24065707_G_T||chr14:24065273:24066398:clu_18671:ENSG00000186648.14||CA-90668-16277-16625-16754-17401[INC][4/1]	CA-90668-16277-16625-16754-17401[INC][4/1]	chr14	24065707	24065622	24065750	90668	LRRC16B	exon	43	0	0.654401	0.0701357	0.0701357
chr2_105091308_G_A	Brain_Spinal_cord_cervical_c-1||chr2_105091308_G_A||chr2:105089995:105092401:clu_33099:ENSG00000135972.8	Brain_Spinal_cord_cervical_c-1||chr2_105091308_G_A||chr2:105089995:105092401:clu_33099:ENSG00000135972.8||CA-64965-54971-56297-56409-57376[INC][5/45]	CA-64965-54971-56297-56409-57376[INC][5/45]	chr2	105091308	105091322	105091433	64965	MRPS9	intron	14	0	0.00759376	0.069626	0.069626
chr22_29225139_C_G	Brain_Amygdala||chr22_29225139_C_G||chr22:29215630:29226490:clu_18450:ENSG00000186998.15	Brain_Amygdala||chr22_29225139_C_G||chr22:29215630:29226490:clu_18450:ENSG00000186998.15||CA-129080-12719-22227-22305-23578[INC][2/3]	CA-129080-12719-22227-22305-23578[INC][2/3]	chr22	29225139	29225139	29225216	129080	EMID1	exon	0	0	0.338543	0.0693949	0.0693949
chr22_29225139_C_G	Brain_Anterior_cingulate_cortex_BA24||chr22_29225139_C_G||chr22:29215630:29226490:clu_19841:ENSG00000186998.15	Brain_Anterior_cingulate_cortex_BA24||chr22_29225139_C_G||chr22:29215630:29226490:clu_19841:ENSG00000186998.15||CA-129080-12719-22227-22305-23578[INC][2/3]	CA-129080-12719-22227-22305-23578[INC][2/3]	chr22	29225139	29225139	29225216	129080	EMID1	exon	0	0	0.338543	0.0693949	0.0693949
chr22_29225139_C_G	Brain_Caudate_basal_ganglia||chr22_29225139_C_G||chr22:29215630:29226490:clu_22367:ENSG00000186998.15	Brain_Caudate_basal_ganglia||chr22_29225139_C_G||chr22:29215630:29226490:clu_22367:ENSG00000186998.15||CA-129080-12719-22227-22305-23578[INC][2/3]	CA-129080-12719-22227-22305-23578[INC][2/3]	chr22	29225139	29225139	29225216	129080	EMID1	exon	0	0	0.338543	0.0693949	0.0693949
chr22_29225139_C_G	Brain_Cerebellum||chr22_29225139_C_G||chr22:29215630:29226490:clu_24800:ENSG00000186998.15	Brain_Cerebellum||chr22_29225139_C_G||chr22:29215630:29226490:clu_24800:ENSG00000186998.15||CA-129080-12719-22227-22305-23578[INC][2/3]	CA-129080-12719-22227-22305-23578[INC][2/3]	chr22	29225139	29225139	29225216	129080	EMID1	exon	0	0	0.338543	0.0693949	0.0693949
chr22_29225139_C_G	Brain_Cortex||chr22_29225139_C_G||chr22:29215630:29226490:clu_23092:ENSG00000186998.15	Brain_Cortex||chr22_29225139_C_G||chr22:29215630:29226490:clu_23092:ENSG00000186998.15||CA-129080-12719-22227-22305-23578[INC][2/3]	CA-129080-12719-22227-22305-23578[INC][2/3]	chr22	29225139	29225139	29225216	129080	EMID1	exon	0	0	0.338543	0.0693949	0.0693949
chr22_29225139_C_G	Brain_Frontal_Cortex_BA9||chr22_29225139_C_G||chr22:29215630:29226490:clu_21440:ENSG00000186998.15	Brain_Frontal_Cortex_BA9||chr22_29225139_C_G||chr22:29215630:29226490:clu_21440:ENSG00000186998.15||CA-129080-12719-22227-22305-23578[INC][2/3]	CA-129080-12719-22227-22305-23578[INC][2/3]	chr22	29225139	29225139	29225216	129080	EMID1	exon	0	0	0.338543	0.0693949	0.0693949
chr22_29225139_C_G	Brain_Hippocampus||chr22_29225139_C_G||chr22:29215630:29226490:clu_20425:ENSG00000186998.15	Brain_Hippocampus||chr22_29225139_C_G||chr22:29215630:29226490:clu_20425:ENSG00000186998.15||CA-129080-12719-22227-22305-23578[INC][2/3]	CA-129080-12719-22227-22305-23578[INC][2/3]	chr22	29225139	29225139	29225216	129080	EMID1	exon	0	0	0.338543	0.0693949	0.0693949
chr22_29225139_C_G	Brain_Hypothalamus||chr22_29225139_C_G||chr22:29215630:29226490:clu_21849:ENSG00000186998.15	Brain_Hypothalamus||chr22_29225139_C_G||chr22:29215630:29226490:clu_21849:ENSG00000186998.15||CA-129080-12719-22227-22305-23578[INC][2/3]	CA-129080-12719-22227-22305-23578[INC][2/3]	chr22	29225139	29225139	29225216	129080	EMID1	exon	0	0	0.338543	0.0693949	0.0693949
chr22_29225139_C_G	Brain_Nucleus_accumbens_basal_ganglia||chr22_29225139_C_G||chr22:29215630:29226490:clu_22856:ENSG00000186998.15	Brain_Nucleus_accumbens_basal_ganglia||chr22_29225139_C_G||chr22:29215630:29226490:clu_22856:ENSG00000186998.15||CA-129080-12719-22227-22305-23578[INC][2/3]	CA-129080-12719-22227-22305-23578[INC][2/3]	chr22	29225139	29225139	29225216	129080	EMID1	exon	0	0	0.338543	0.0693949	0.0693949
chr22_29225139_C_G	Brain_Putamen_basal_ganglia||chr22_29225139_C_G||chr22:29215630:29226490:clu_20093:ENSG00000186998.15	Brain_Putamen_basal_ganglia||chr22_29225139_C_G||chr22:29215630:29226490:clu_20093:ENSG00000186998.15||CA-129080-12719-22227-22305-23578[INC][2/3]	CA-129080-12719-22227-22305-23578[INC][2/3]	chr22	29225139	29225139	29225216	129080	EMID1	exon	0	0	0.338543	0.0693949	0.0693949
chr13_114299007_G_A	Brain_Amygdala||chr13_114299007_G_A||chr13:114291792:114301731:clu_1910:ENSG00000169062.14	Brain_Amygdala||chr13_114299007_G_A||chr13:114291792:114301731:clu_1910:ENSG00000169062.14||CA-65110-13209-20256-20417-23147[INC][35/17]	CA-65110-13209-20256-20417-23147[INC][35/17]	chr13	114299007	114298840	114299000	65110	UPF3A	intron	7	0	0.781046	0.0688249	0.0688249
chr13_114299007_G_A	Brain_Cortex||chr13_114299007_G_A||chr13:114291792:114301731:clu_2395:ENSG00000169062.14	Brain_Cortex||chr13_114299007_G_A||chr13:114291792:114301731:clu_2395:ENSG00000169062.14||CA-65110-13209-20256-20417-23147[INC][35/17]	CA-65110-13209-20256-20417-23147[INC][35/17]	chr13	114299007	114298840	114299000	65110	UPF3A	intron	7	0	0.781046	0.0688249	0.0688249
chr13_114299007_G_A	Brain_Hippocampus||chr13_114299007_G_A||chr13:114291792:114301731:clu_2122:ENSG00000169062.14	Brain_Hippocampus||chr13_114299007_G_A||chr13:114291792:114301731:clu_2122:ENSG00000169062.14||CA-65110-13209-20256-20417-23147[INC][35/17]	CA-65110-13209-20256-20417-23147[INC][35/17]	chr13	114299007	114298840	114299000	65110	UPF3A	intron	7	0	0.781046	0.0688249	0.0688249
chr13_114299007_G_A	Brain_Putamen_basal_ganglia||chr13_114299007_G_A||chr13:114291792:114301731:clu_2054:ENSG00000169062.14	Brain_Putamen_basal_ganglia||chr13_114299007_G_A||chr13:114291792:114301731:clu_2054:ENSG00000169062.14||CA-65110-13209-20256-20417-23147[INC][35/17]	CA-65110-13209-20256-20417-23147[INC][35/17]	chr13	114299007	114298840	114299000	65110	UPF3A	intron	7	0	0.781046	0.0688249	0.0688249
chr15_50484328_T_C	Brain_Caudate_basal_ganglia||chr15_50484328_T_C||chr15:50482065:50489801:clu_15619:ENSG00000138592.13	Brain_Caudate_basal_ganglia||chr15_50484328_T_C||chr15:50482065:50489801:clu_15619:ENSG00000138592.13||CA-9101-60689-62898-62985-68424[INC][21/17]	CA-9101-60689-62898-62985-68424[INC][21/17]	chr15	50484328	50484275	50484361	9101	USP8	exon	33	0	0.542506	0.0682444	0.0682444
chr15_50484328_T_C	Brain_Cerebellar_Hemisphere||chr15_50484328_T_C||chr15:50482065:50489801:clu_16609:ENSG00000138592.13	Brain_Cerebellar_Hemisphere||chr15_50484328_T_C||chr15:50482065:50489801:clu_16609:ENSG00000138592.13||CA-9101-60689-62898-62985-68424[INC][21/17]	CA-9101-60689-62898-62985-68424[INC][21/17]	chr15	50484328	50484275	50484361	9101	USP8	exon	33	0	0.542506	0.0682444	0.0682444
chr15_50484328_T_C	Brain_Cerebellum||chr15_50484328_T_C||chr15:50482065:50489801:clu_17345:ENSG00000138592.13	Brain_Cerebellum||chr15_50484328_T_C||chr15:50482065:50489801:clu_17345:ENSG00000138592.13||CA-9101-60689-62898-62985-68424[INC][21/17]	CA-9101-60689-62898-62985-68424[INC][21/17]	chr15	50484328	50484275	50484361	9101	USP8	exon	33	0	0.542506	0.0682444	0.0682444
chr15_50484328_T_C	Brain_Cortex||chr15_50484328_T_C||chr15:50482065:50489801:clu_16143:ENSG00000138592.13	Brain_Cortex||chr15_50484328_T_C||chr15:50482065:50489801:clu_16143:ENSG00000138592.13||CA-9101-60689-62898-62985-68424[INC][21/17]	CA-9101-60689-62898-62985-68424[INC][21/17]	chr15	50484328	50484275	50484361	9101	USP8	exon	33	0	0.542506	0.0682444	0.0682444
chr15_50484328_T_C	Brain_Frontal_Cortex_BA9||chr15_50484328_T_C||chr15:50482065:50489801:clu_14919:ENSG00000138592.13	Brain_Frontal_Cortex_BA9||chr15_50484328_T_C||chr15:50482065:50489801:clu_14919:ENSG00000138592.13||CA-9101-60689-62898-62985-68424[INC][21/17]	CA-9101-60689-62898-62985-68424[INC][21/17]	chr15	50484328	50484275	50484361	9101	USP8	exon	33	0	0.542506	0.0682444	0.0682444
chr15_50484328_T_C	Brain_Hypothalamus||chr15_50484328_T_C||chr15:50482065:50489801:clu_15227:ENSG00000138592.13	Brain_Hypothalamus||chr15_50484328_T_C||chr15:50482065:50489801:clu_15227:ENSG00000138592.13||CA-9101-60689-62898-62985-68424[INC][21/17]	CA-9101-60689-62898-62985-68424[INC][21/17]	chr15	50484328	50484275	50484361	9101	USP8	exon	33	0	0.542506	0.0682444	0.0682444
chr15_50484328_T_C	Brain_Nucleus_accumbens_basal_ganglia||chr15_50484328_T_C||chr15:50482065:50489801:clu_15987:ENSG00000138592.13	Brain_Nucleus_accumbens_basal_ganglia||chr15_50484328_T_C||chr15:50482065:50489801:clu_15987:ENSG00000138592.13||CA-9101-60689-62898-62985-68424[INC][21/17]	CA-9101-60689-62898-62985-68424[INC][21/17]	chr15	50484328	50484275	50484361	9101	USP8	exon	33	0	0.542506	0.0682444	0.0682444
chr15_50484328_T_C	Brain_Putamen_basal_ganglia||chr15_50484328_T_C||chr15:50482065:50489801:clu_13987:ENSG00000138592.13	Brain_Putamen_basal_ganglia||chr15_50484328_T_C||chr15:50482065:50489801:clu_13987:ENSG00000138592.13||CA-9101-60689-62898-62985-68424[INC][21/17]	CA-9101-60689-62898-62985-68424[INC][21/17]	chr15	50484328	50484275	50484361	9101	USP8	exon	33	0	0.542506	0.0682444	0.0682444
chr15_50484328_T_C	Brain_Spinal_cord_cervical_c-1||chr15_50484328_T_C||chr15:50482065:50489801:clu_13650:ENSG00000138592.13	Brain_Spinal_cord_cervical_c-1||chr15_50484328_T_C||chr15:50482065:50489801:clu_13650:ENSG00000138592.13||CA-9101-60689-62898-62985-68424[INC][21/17]	CA-9101-60689-62898-62985-68424[INC][21/17]	chr15	50484328	50484275	50484361	9101	USP8	exon	33	0	0.542506	0.0682444	0.0682444
chr3_52524888_A_T	Brain_Cerebellar_Hemisphere||chr3_52524888_A_T||chr3:52524611:52524963:clu_36415:ENSG00000168268.10	Brain_Cerebellar_Hemisphere||chr3_52524888_A_T||chr3:52524611:52524963:clu_36415:ENSG00000168268.10||CA-64943-13115-13196-13261-13466[INC][5/1][DNT]	CA-64943-13115-13196-13261-13466[INC][5/1][DNT]	chr3	52524888	52524817	52524881	64943	NT5DC2	intron	7	0	0.972699	-0.0678112	0.0678112
chr3_52524888_A_T	Brain_Cerebellum||chr3_52524888_A_T||chr3:52524611:52524963:clu_38236:ENSG00000168268.10	Brain_Cerebellum||chr3_52524888_A_T||chr3:52524611:52524963:clu_38236:ENSG00000168268.10||CA-64943-13115-13196-13261-13466[INC][5/1][DNT]	CA-64943-13115-13196-13261-13466[INC][5/1][DNT]	chr3	52524888	52524817	52524881	64943	NT5DC2	intron	7	0	0.972699	-0.0678112	0.0678112
chr4_38060612_T_A	Brain_Cerebellum||chr4_38060612_T_A||chr4:38054338:38089932:clu_35620:ENSG00000065882.15	Brain_Cerebellum||chr4_38060612_T_A||chr4:38054338:38089932:clu_35620:ENSG00000065882.15||CA-23216-166255-172536-172575-201848[INC][9/77]	CA-23216-166255-172536-172575-201848[INC][9/77]	chr4	38060612	38060620	38060658	23216	TBC1D1	intron	8	0	0.0957211	-0.0673108	0.0673108
chr4_38060612_T_A	Brain_Cortex||chr4_38060612_T_A||chr4:38054338:38089932:clu_33270:ENSG00000065882.15	Brain_Cortex||chr4_38060612_T_A||chr4:38054338:38089932:clu_33270:ENSG00000065882.15||CA-23216-166255-172536-172575-201848[INC][9/77]	CA-23216-166255-172536-172575-201848[INC][9/77]	chr4	38060612	38060620	38060658	23216	TBC1D1	intron	8	0	0.0957211	-0.0673108	0.0673108
chr4_38060612_T_A	Brain_Hippocampus||chr4_38060612_T_A||chr4:38054338:38089932:clu_29406:ENSG00000065882.15	Brain_Hippocampus||chr4_38060612_T_A||chr4:38054338:38089932:clu_29406:ENSG00000065882.15||CA-23216-166255-172536-172575-201848[INC][9/77]	CA-23216-166255-172536-172575-201848[INC][9/77]	chr4	38060612	38060620	38060658	23216	TBC1D1	intron	8	0	0.0957211	-0.0673108	0.0673108
chr4_38060612_T_A	Brain_Hypothalamus||chr4_38060612_T_A||chr4:38054338:38089932:clu_31528:ENSG00000065882.15	Brain_Hypothalamus||chr4_38060612_T_A||chr4:38054338:38089932:clu_31528:ENSG00000065882.15||CA-23216-166255-172536-172575-201848[INC][9/77]	CA-23216-166255-172536-172575-201848[INC][9/77]	chr4	38060612	38060620	38060658	23216	TBC1D1	intron	8	0	0.0957211	-0.0673108	0.0673108
chr4_184648473_G_C	Brain_Cerebellar_Hemisphere||chr4_184648473_G_C||chr4:184638468:184649395:clu_35078:ENSG00000164305.18	Brain_Cerebellar_Hemisphere||chr4_184648473_G_C||chr4:184638468:184649395:clu_35078:ENSG00000164305.18||CA-836-3081-3844-4011-14007[INC][42/108][UPT]	CA-836-3081-3844-4011-14007[INC][42/108][UPT]	chr4	184648473	184648465	184648631	836	CASP3	exon	8	0	0.126994	0.0664168	0.0664168
chr4_184648473_G_C	Brain_Cerebellum||chr4_184648473_G_C||chr4:184638468:184649395:clu_36820:ENSG00000164305.18	Brain_Cerebellum||chr4_184648473_G_C||chr4:184638468:184649395:clu_36820:ENSG00000164305.18||CA-836-3081-3844-4011-14007[INC][42/108][UPT]	CA-836-3081-3844-4011-14007[INC][42/108][UPT]	chr4	184648473	184648465	184648631	836	CASP3	exon	8	0	0.126994	0.0664168	0.0664168
chr2_37352828_C_T	Brain_Hypothalamus||chr2_37352828_C_T||chr2:37344851:37359580:clu_36099:ENSG00000115828.15	Brain_Hypothalamus||chr2_37352828_C_T||chr2:37344851:37359580:clu_36099:ENSG00000115828.15||CA-25797-3242-11179-11326-17970[INC][95/7][UPT]	CA-25797-3242-11179-11326-17970[INC][95/7][UPT]	chr2	37352828	37352789	37352935	25797	QPCT	exon	39	0	0.967163	-0.0658884	0.0658884
chr1_24391585_T_C	Brain_Amygdala||chr1_24391585_T_C||chr1:24384003:24401319:clu_33287:ENSG00000001460.17	Brain_Amygdala||chr1_24391585_T_C||chr1:24384003:24401319:clu_33287:ENSG00000001460.17||CA-90529-16779-26418-26537-34094[INC][18/18]	CA-90529-16779-26418-26537-34094[INC][18/18]	chr1	24391585	24391561	24391679	90529	C1orf201	exon	24	0	0.227831	-0.0658009	0.0658009
chr1_24391585_T_C	Brain_Anterior_cingulate_cortex_BA24||chr1_24391585_T_C||chr1:24384003:24401319:clu_35939:ENSG00000001460.17	Brain_Anterior_cingulate_cortex_BA24||chr1_24391585_T_C||chr1:24384003:24401319:clu_35939:ENSG00000001460.17||CA-90529-16779-26418-26537-34094[INC][18/18]	CA-90529-16779-26418-26537-34094[INC][18/18]	chr1	24391585	24391561	24391679	90529	C1orf201	exon	24	0	0.227831	-0.0658009	0.0658009
chr1_24391585_T_C	Brain_Caudate_basal_ganglia||chr1_24391585_T_C||chr1:24384003:24401319:clu_40748:ENSG00000001460.17	Brain_Caudate_basal_ganglia||chr1_24391585_T_C||chr1:24384003:24401319:clu_40748:ENSG00000001460.17||CA-90529-16779-26418-26537-34094[INC][18/18]	CA-90529-16779-26418-26537-34094[INC][18/18]	chr1	24391585	24391561	24391679	90529	C1orf201	exon	24	0	0.227831	-0.0658009	0.0658009
chr1_24391585_T_C	Brain_Cerebellar_Hemisphere||chr1_24391585_T_C||chr1:24384003:24401319:clu_42489:ENSG00000001460.17	Brain_Cerebellar_Hemisphere||chr1_24391585_T_C||chr1:24384003:24401319:clu_42489:ENSG00000001460.17||CA-90529-16779-26418-26537-34094[INC][18/18]	CA-90529-16779-26418-26537-34094[INC][18/18]	chr1	24391585	24391561	24391679	90529	C1orf201	exon	24	0	0.227831	-0.0658009	0.0658009
chr1_24391585_T_C	Brain_Cerebellum||chr1_24391585_T_C||chr1:24384003:24401319:clu_44689:ENSG00000001460.17	Brain_Cerebellum||chr1_24391585_T_C||chr1:24384003:24401319:clu_44689:ENSG00000001460.17||CA-90529-16779-26418-26537-34094[INC][18/18]	CA-90529-16779-26418-26537-34094[INC][18/18]	chr1	24391585	24391561	24391679	90529	C1orf201	exon	24	0	0.227831	-0.0658009	0.0658009
chr1_24391585_T_C	Brain_Cortex||chr1_24391585_T_C||chr1:24384003:24401319:clu_41884:ENSG00000001460.17	Brain_Cortex||chr1_24391585_T_C||chr1:24384003:24401319:clu_41884:ENSG00000001460.17||CA-90529-16779-26418-26537-34094[INC][18/18]	CA-90529-16779-26418-26537-34094[INC][18/18]	chr1	24391585	24391561	24391679	90529	C1orf201	exon	24	0	0.227831	-0.0658009	0.0658009
chr1_24391585_T_C	Brain_Frontal_Cortex_BA9||chr1_24391585_T_C||chr1:24384003:24401319:clu_38960:ENSG00000001460.17	Brain_Frontal_Cortex_BA9||chr1_24391585_T_C||chr1:24384003:24401319:clu_38960:ENSG00000001460.17||CA-90529-16779-26418-26537-34094[INC][18/18]	CA-90529-16779-26418-26537-34094[INC][18/18]	chr1	24391585	24391561	24391679	90529	C1orf201	exon	24	0	0.227831	-0.0658009	0.0658009
chr1_24391585_T_C	Brain_Hippocampus||chr1_24391585_T_C||chr1:24384003:24401319:clu_37010:ENSG00000001460.17	Brain_Hippocampus||chr1_24391585_T_C||chr1:24384003:24401319:clu_37010:ENSG00000001460.17||CA-90529-16779-26418-26537-34094[INC][18/18]	CA-90529-16779-26418-26537-34094[INC][18/18]	chr1	24391585	24391561	24391679	90529	C1orf201	exon	24	0	0.227831	-0.0658009	0.0658009
chr1_24391585_T_C	Brain_Hypothalamus||chr1_24391585_T_C||chr1:24384003:24401319:clu_39727:ENSG00000001460.17	Brain_Hypothalamus||chr1_24391585_T_C||chr1:24384003:24401319:clu_39727:ENSG00000001460.17||CA-90529-16779-26418-26537-34094[INC][18/18]	CA-90529-16779-26418-26537-34094[INC][18/18]	chr1	24391585	24391561	24391679	90529	C1orf201	exon	24	0	0.227831	-0.0658009	0.0658009
chr1_24391585_T_C	Brain_Nucleus_accumbens_basal_ganglia||chr1_24391585_T_C||chr1:24384003:24401319:clu_41727:ENSG00000001460.17	Brain_Nucleus_accumbens_basal_ganglia||chr1_24391585_T_C||chr1:24384003:24401319:clu_41727:ENSG00000001460.17||CA-90529-16779-26418-26537-34094[INC][18/18]	CA-90529-16779-26418-26537-34094[INC][18/18]	chr1	24391585	24391561	24391679	90529	C1orf201	exon	24	0	0.227831	-0.0658009	0.0658009
chr1_24391585_T_C	Brain_Putamen_basal_ganglia||chr1_24391585_T_C||chr1:24384003:24401319:clu_36321:ENSG00000001460.17	Brain_Putamen_basal_ganglia||chr1_24391585_T_C||chr1:24384003:24401319:clu_36321:ENSG00000001460.17||CA-90529-16779-26418-26537-34094[INC][18/18]	CA-90529-16779-26418-26537-34094[INC][18/18]	chr1	24391585	24391561	24391679	90529	C1orf201	exon	24	0	0.227831	-0.0658009	0.0658009
chr1_24391585_T_C	Brain_Spinal_cord_cervical_c-1||chr1_24391585_T_C||chr1:24384003:24401319:clu_35372:ENSG00000001460.17	Brain_Spinal_cord_cervical_c-1||chr1_24391585_T_C||chr1:24384003:24401319:clu_35372:ENSG00000001460.17||CA-90529-16779-26418-26537-34094[INC][18/18]	CA-90529-16779-26418-26537-34094[INC][18/18]	chr1	24391585	24391561	24391679	90529	C1orf201	exon	24	0	0.227831	-0.0658009	0.0658009
chr1_24391585_T_C	Brain_Substantia_nigra||chr1_24391585_T_C||chr1:24384003:24401319:clu_31845:ENSG00000001460.17	Brain_Substantia_nigra||chr1_24391585_T_C||chr1:24384003:24401319:clu_31845:ENSG00000001460.17||CA-90529-16779-26418-26537-34094[INC][18/18]	CA-90529-16779-26418-26537-34094[INC][18/18]	chr1	24391585	24391561	24391679	90529	C1orf201	exon	24	0	0.227831	-0.0658009	0.0658009
chr16_53638443_C_T	Brain_Amygdala||chr16_53638443_C_T||chr16:53637854:53641033:clu_11556:ENSG00000103494.12	Brain_Amygdala||chr16_53638443_C_T||chr16:53637854:53641033:clu_11556:ENSG00000103494.12||CA-23322-65906-68527-68629-69084[INC][16/9]	CA-23322-65906-68527-68629-69084[INC][16/9]	chr16	53638443	53638310	53638411	23322	RPGRIP1L	intron	32	0	0.619119	0.0650295	0.0650295
chr16_53638443_C_T	Brain_Anterior_cingulate_cortex_BA24||chr16_53638443_C_T||chr16:53637854:53641033:clu_12413:ENSG00000103494.12	Brain_Anterior_cingulate_cortex_BA24||chr16_53638443_C_T||chr16:53637854:53641033:clu_12413:ENSG00000103494.12||CA-23322-65906-68527-68629-69084[INC][16/9]	CA-23322-65906-68527-68629-69084[INC][16/9]	chr16	53638443	53638310	53638411	23322	RPGRIP1L	intron	32	0	0.619119	0.0650295	0.0650295
chr16_53638443_C_T	Brain_Caudate_basal_ganglia||chr16_53638443_C_T||chr16:53637854:53641033:clu_14047:ENSG00000103494.12	Brain_Caudate_basal_ganglia||chr16_53638443_C_T||chr16:53637854:53641033:clu_14047:ENSG00000103494.12||CA-23322-65906-68527-68629-69084[INC][16/9]	CA-23322-65906-68527-68629-69084[INC][16/9]	chr16	53638443	53638310	53638411	23322	RPGRIP1L	intron	32	0	0.619119	0.0650295	0.0650295
chr16_53638443_C_T	Brain_Cerebellar_Hemisphere||chr16_53638443_C_T||chr16:53637854:53641033:clu_14848:ENSG00000103494.12	Brain_Cerebellar_Hemisphere||chr16_53638443_C_T||chr16:53637854:53641033:clu_14848:ENSG00000103494.12||CA-23322-65906-68527-68629-69084[INC][16/9]	CA-23322-65906-68527-68629-69084[INC][16/9]	chr16	53638443	53638310	53638411	23322	RPGRIP1L	intron	32	0	0.619119	0.0650295	0.0650295
chr16_53638443_C_T	Brain_Cerebellum||chr16_53638443_C_T||chr16:53637854:53641033:clu_15508:ENSG00000103494.12	Brain_Cerebellum||chr16_53638443_C_T||chr16:53637854:53641033:clu_15508:ENSG00000103494.12||CA-23322-65906-68527-68629-69084[INC][16/9]	CA-23322-65906-68527-68629-69084[INC][16/9]	chr16	53638443	53638310	53638411	23322	RPGRIP1L	intron	32	0	0.619119	0.0650295	0.0650295
chr16_53638443_C_T	Brain_Cortex||chr16_53638443_C_T||chr16:53637854:53641033:clu_14536:ENSG00000103494.12	Brain_Cortex||chr16_53638443_C_T||chr16:53637854:53641033:clu_14536:ENSG00000103494.12||CA-23322-65906-68527-68629-69084[INC][16/9]	CA-23322-65906-68527-68629-69084[INC][16/9]	chr16	53638443	53638310	53638411	23322	RPGRIP1L	intron	32	0	0.619119	0.0650295	0.0650295
chr16_53638443_C_T	Brain_Frontal_Cortex_BA9||chr16_53638443_C_T||chr16:53637854:53641033:clu_13446:ENSG00000103494.12	Brain_Frontal_Cortex_BA9||chr16_53638443_C_T||chr16:53637854:53641033:clu_13446:ENSG00000103494.12||CA-23322-65906-68527-68629-69084[INC][16/9]	CA-23322-65906-68527-68629-69084[INC][16/9]	chr16	53638443	53638310	53638411	23322	RPGRIP1L	intron	32	0	0.619119	0.0650295	0.0650295
chr16_53638443_C_T	Brain_Hippocampus||chr16_53638443_C_T||chr16:53637854:53641033:clu_12840:ENSG00000103494.12	Brain_Hippocampus||chr16_53638443_C_T||chr16:53637854:53641033:clu_12840:ENSG00000103494.12||CA-23322-65906-68527-68629-69084[INC][16/9]	CA-23322-65906-68527-68629-69084[INC][16/9]	chr16	53638443	53638310	53638411	23322	RPGRIP1L	intron	32	0	0.619119	0.0650295	0.0650295
chr16_53638443_C_T	Brain_Hypothalamus||chr16_53638443_C_T||chr16:53637854:53641033:clu_13698:ENSG00000103494.12	Brain_Hypothalamus||chr16_53638443_C_T||chr16:53637854:53641033:clu_13698:ENSG00000103494.12||CA-23322-65906-68527-68629-69084[INC][16/9]	CA-23322-65906-68527-68629-69084[INC][16/9]	chr16	53638443	53638310	53638411	23322	RPGRIP1L	intron	32	0	0.619119	0.0650295	0.0650295
chr16_53638443_C_T	Brain_Nucleus_accumbens_basal_ganglia||chr16_53638443_C_T||chr16:53637854:53641033:clu_14349:ENSG00000103494.12	Brain_Nucleus_accumbens_basal_ganglia||chr16_53638443_C_T||chr16:53637854:53641033:clu_14349:ENSG00000103494.12||CA-23322-65906-68527-68629-69084[INC][16/9]	CA-23322-65906-68527-68629-69084[INC][16/9]	chr16	53638443	53638310	53638411	23322	RPGRIP1L	intron	32	0	0.619119	0.0650295	0.0650295
chr16_53638443_C_T	Brain_Putamen_basal_ganglia||chr16_53638443_C_T||chr16:53637854:53641033:clu_12593:ENSG00000103494.12	Brain_Putamen_basal_ganglia||chr16_53638443_C_T||chr16:53637854:53641033:clu_12593:ENSG00000103494.12||CA-23322-65906-68527-68629-69084[INC][16/9]	CA-23322-65906-68527-68629-69084[INC][16/9]	chr16	53638443	53638310	53638411	23322	RPGRIP1L	intron	32	0	0.619119	0.0650295	0.0650295
chr16_53638443_C_T	Brain_Spinal_cord_cervical_c-1||chr16_53638443_C_T||chr16:53637854:53641033:clu_12312:ENSG00000103494.12	Brain_Spinal_cord_cervical_c-1||chr16_53638443_C_T||chr16:53637854:53641033:clu_12312:ENSG00000103494.12||CA-23322-65906-68527-68629-69084[INC][16/9]	CA-23322-65906-68527-68629-69084[INC][16/9]	chr16	53638443	53638310	53638411	23322	RPGRIP1L	intron	32	0	0.619119	0.0650295	0.0650295
chr16_53638443_C_T	Brain_Substantia_nigra||chr16_53638443_C_T||chr16:53637854:53641033:clu_11107:ENSG00000103494.12	Brain_Substantia_nigra||chr16_53638443_C_T||chr16:53637854:53641033:clu_11107:ENSG00000103494.12||CA-23322-65906-68527-68629-69084[INC][16/9]	CA-23322-65906-68527-68629-69084[INC][16/9]	chr16	53638443	53638310	53638411	23322	RPGRIP1L	intron	32	0	0.619119	0.0650295	0.0650295
chr7_6577616_C_G	Brain_Amygdala||chr7_6577616_C_G||chr7:6577498:6578566:clu_20833:ENSG00000136247.14	Brain_Amygdala||chr7_6577616_C_G||chr7:6577498:6578566:clu_20833:ENSG00000136247.14||CA-55146-3065-3156-3287-4132[INC][9/48][UPT]	CA-55146-3065-3156-3287-4132[INC][9/48][UPT]	chr7	6577616	6577590	6577720	55146	ZDHHC4	exon	26	0	0.317222	0.0648194	0.0648194
chr7_6577616_C_G	Brain_Caudate_basal_ganglia||chr7_6577616_C_G||chr7:6577498:6578566:clu_25274:ENSG00000136247.14	Brain_Caudate_basal_ganglia||chr7_6577616_C_G||chr7:6577498:6578566:clu_25274:ENSG00000136247.14||CA-55146-3065-3156-3287-4132[INC][9/48][UPT]	CA-55146-3065-3156-3287-4132[INC][9/48][UPT]	chr7	6577616	6577590	6577720	55146	ZDHHC4	exon	26	0	0.317222	0.0648194	0.0648194
chr7_6577616_C_G	Brain_Cerebellum||chr7_6577616_C_G||chr7:6577498:6578566:clu_28005:ENSG00000136247.14	Brain_Cerebellum||chr7_6577616_C_G||chr7:6577498:6578566:clu_28005:ENSG00000136247.14||CA-55146-3065-3156-3287-4132[INC][9/48][UPT]	CA-55146-3065-3156-3287-4132[INC][9/48][UPT]	chr7	6577616	6577590	6577720	55146	ZDHHC4	exon	26	0	0.317222	0.0648194	0.0648194
chr7_6577616_C_G	Brain_Cortex||chr7_6577616_C_G||chr7:6577498:6578566:clu_26077:ENSG00000136247.14	Brain_Cortex||chr7_6577616_C_G||chr7:6577498:6578566:clu_26077:ENSG00000136247.14||CA-55146-3065-3156-3287-4132[INC][9/48][UPT]	CA-55146-3065-3156-3287-4132[INC][9/48][UPT]	chr7	6577616	6577590	6577720	55146	ZDHHC4	exon	26	0	0.317222	0.0648194	0.0648194
chr7_6577616_C_G	Brain_Hypothalamus||chr7_6577616_C_G||chr7:6577498:6578566:clu_24693:ENSG00000136247.14	Brain_Hypothalamus||chr7_6577616_C_G||chr7:6577498:6578566:clu_24693:ENSG00000136247.14||CA-55146-3065-3156-3287-4132[INC][9/48][UPT]	CA-55146-3065-3156-3287-4132[INC][9/48][UPT]	chr7	6577616	6577590	6577720	55146	ZDHHC4	exon	26	0	0.317222	0.0648194	0.0648194
chr7_6577616_C_G	Brain_Nucleus_accumbens_basal_ganglia||chr7_6577616_C_G||chr7:6577498:6578566:clu_25810:ENSG00000136247.14	Brain_Nucleus_accumbens_basal_ganglia||chr7_6577616_C_G||chr7:6577498:6578566:clu_25810:ENSG00000136247.14||CA-55146-3065-3156-3287-4132[INC][9/48][UPT]	CA-55146-3065-3156-3287-4132[INC][9/48][UPT]	chr7	6577616	6577590	6577720	55146	ZDHHC4	exon	26	0	0.317222	0.0648194	0.0648194
chr7_6577616_C_G	Brain_Putamen_basal_ganglia||chr7_6577616_C_G||chr7:6577498:6578566:clu_22705:ENSG00000136247.14	Brain_Putamen_basal_ganglia||chr7_6577616_C_G||chr7:6577498:6578566:clu_22705:ENSG00000136247.14||CA-55146-3065-3156-3287-4132[INC][9/48][UPT]	CA-55146-3065-3156-3287-4132[INC][9/48][UPT]	chr7	6577616	6577590	6577720	55146	ZDHHC4	exon	26	0	0.317222	0.0648194	0.0648194
chr7_6577616_C_G	Brain_Substantia_nigra||chr7_6577616_C_G||chr7:6577498:6578566:clu_20001:ENSG00000136247.14	Brain_Substantia_nigra||chr7_6577616_C_G||chr7:6577498:6578566:clu_20001:ENSG00000136247.14||CA-55146-3065-3156-3287-4132[INC][9/48][UPT]	CA-55146-3065-3156-3287-4132[INC][9/48][UPT]	chr7	6577616	6577590	6577720	55146	ZDHHC4	exon	26	0	0.317222	0.0648194	0.0648194
chr2_190656119_C_A	Brain_Caudate_basal_ganglia||chr2_190656119_C_A||chr2:190649982:190659158:clu_38950:ENSG00000138386.16	Brain_Caudate_basal_ganglia||chr2_190656119_C_A||chr2:190649982:190659158:clu_38950:ENSG00000138386.16||CA-4664-4088-10082-10259-13263[INC][4/7]	CA-4664-4088-10082-10259-13263[INC][4/7]	chr2	190656119	190655977	190656153	4664	NAB1	exon	34	0	0.144649	-0.0647705	0.0647705
chr2_190656119_C_A	Brain_Cortex||chr2_190656119_C_A||chr2:190649360:190659158:clu_40064:ENSG00000138386.16	Brain_Cortex||chr2_190656119_C_A||chr2:190649360:190659158:clu_40064:ENSG00000138386.16||CA-4664-3466-10082-10259-13263[INC][3/16][UPT]	CA-4664-3466-10082-10259-13263[INC][3/16][UPT]	chr2	190656119	190655977	190656153	4664	NAB1	exon	34	0	0.144649	-0.0647705	0.0647705
chr2_190656119_C_A	Brain_Spinal_cord_cervical_c-1||chr2_190656119_C_A||chr2:190649982:190659158:clu_33872:ENSG00000138386.16	Brain_Spinal_cord_cervical_c-1||chr2_190656119_C_A||chr2:190649982:190659158:clu_33872:ENSG00000138386.16||CA-4664-4088-10082-10259-13263[INC][4/7]	CA-4664-4088-10082-10259-13263[INC][4/7]	chr2	190656119	190655977	190656153	4664	NAB1	exon	34	0	0.144649	-0.0647705	0.0647705
chr14_63288272_G_C	Brain_Nucleus_accumbens_basal_ganglia||chr14_63288272_G_C||chr14:63283216:63290878:clu_17729:ENSG00000126785.12	Brain_Nucleus_accumbens_basal_ganglia||chr14_63288272_G_C||chr14:63283216:63290878:clu_17729:ENSG00000126785.12||CA-57381-81833-86804-86934-89494[INC][1/21][DNT]	CA-57381-81833-86804-86934-89494[INC][1/21][DNT]	chr14	63288272	63288188	63288317	57381	RHOJ	exon	45	0	0.0444732	0.0647169	0.0647169
chr20_3213196_C_A	Brain_Amygdala||chr20_3213196_C_A||chr20:3209617:3213985:clu_19251:ENSG00000125877.12	Brain_Amygdala||chr20_3213196_C_A||chr20:3209617:3213985:clu_19251:ENSG00000125877.12||CA-3704-3750-7301-7359-8117[INC][2/3][UPT]	CA-3704-3750-7301-7359-8117[INC][2/3][UPT]	chr20	3213196	3213169	3213226	3704	ITPA	exon	27	0	0.88858	-0.0642597	0.0642597
chr20_3213196_C_A	Brain_Anterior_cingulate_cortex_BA24||chr20_3213196_C_A||chr20:3209617:3213985:clu_20706:ENSG00000125877.12	Brain_Anterior_cingulate_cortex_BA24||chr20_3213196_C_A||chr20:3209617:3213985:clu_20706:ENSG00000125877.12||CA-3704-3750-7301-7359-8117[INC][2/3][UPT]	CA-3704-3750-7301-7359-8117[INC][2/3][UPT]	chr20	3213196	3213169	3213226	3704	ITPA	exon	27	0	0.88858	-0.0642597	0.0642597
chr20_3213196_C_A	Brain_Caudate_basal_ganglia||chr20_3213196_C_A||chr20:3209617:3213985:clu_23335:ENSG00000125877.12	Brain_Caudate_basal_ganglia||chr20_3213196_C_A||chr20:3209617:3213985:clu_23335:ENSG00000125877.12||CA-3704-3750-7301-7359-8117[INC][2/3][UPT]	CA-3704-3750-7301-7359-8117[INC][2/3][UPT]	chr20	3213196	3213169	3213226	3704	ITPA	exon	27	0	0.88858	-0.0642597	0.0642597
chr20_3213196_C_A	Brain_Cerebellar_Hemisphere||chr20_3213196_C_A||chr20:3209617:3213985:clu_24719:ENSG00000125877.12	Brain_Cerebellar_Hemisphere||chr20_3213196_C_A||chr20:3209617:3213985:clu_24719:ENSG00000125877.12||CA-3704-3750-7301-7359-8117[INC][2/3][UPT]	CA-3704-3750-7301-7359-8117[INC][2/3][UPT]	chr20	3213196	3213169	3213226	3704	ITPA	exon	27	0	0.88858	-0.0642597	0.0642597
chr20_3213196_C_A	Brain_Cerebellum||chr20_3213196_C_A||chr20:3209617:3213985:clu_25858:ENSG00000125877.12	Brain_Cerebellum||chr20_3213196_C_A||chr20:3209617:3213985:clu_25858:ENSG00000125877.12||CA-3704-3750-7301-7359-8117[INC][2/3][UPT]	CA-3704-3750-7301-7359-8117[INC][2/3][UPT]	chr20	3213196	3213169	3213226	3704	ITPA	exon	27	0	0.88858	-0.0642597	0.0642597
chr20_3213196_C_A	Brain_Cortex||chr20_3213196_C_A||chr20:3209617:3213985:clu_24091:ENSG00000125877.12	Brain_Cortex||chr20_3213196_C_A||chr20:3209617:3213985:clu_24091:ENSG00000125877.12||CA-3704-3750-7301-7359-8117[INC][2/3][UPT]	CA-3704-3750-7301-7359-8117[INC][2/3][UPT]	chr20	3213196	3213169	3213226	3704	ITPA	exon	27	0	0.88858	-0.0642597	0.0642597
chr20_3213196_C_A	Brain_Frontal_Cortex_BA9||chr20_3213196_C_A||chr20:3209617:3213985:clu_22350:ENSG00000125877.12	Brain_Frontal_Cortex_BA9||chr20_3213196_C_A||chr20:3209617:3213985:clu_22350:ENSG00000125877.12||CA-3704-3750-7301-7359-8117[INC][2/3][UPT]	CA-3704-3750-7301-7359-8117[INC][2/3][UPT]	chr20	3213196	3213169	3213226	3704	ITPA	exon	27	0	0.88858	-0.0642597	0.0642597
chr20_3213196_C_A	Brain_Hippocampus||chr20_3213196_C_A||chr20:3209617:3213985:clu_21301:ENSG00000125877.12	Brain_Hippocampus||chr20_3213196_C_A||chr20:3209617:3213985:clu_21301:ENSG00000125877.12||CA-3704-3750-7301-7359-8117[INC][2/3][UPT]	CA-3704-3750-7301-7359-8117[INC][2/3][UPT]	chr20	3213196	3213169	3213226	3704	ITPA	exon	27	0	0.88858	-0.0642597	0.0642597
chr20_3213196_C_A	Brain_Hypothalamus||chr20_3213196_C_A||chr20:3209617:3213985:clu_22801:ENSG00000125877.12	Brain_Hypothalamus||chr20_3213196_C_A||chr20:3209617:3213985:clu_22801:ENSG00000125877.12||CA-3704-3750-7301-7359-8117[INC][2/3][UPT]	CA-3704-3750-7301-7359-8117[INC][2/3][UPT]	chr20	3213196	3213169	3213226	3704	ITPA	exon	27	0	0.88858	-0.0642597	0.0642597
chr20_3213196_C_A	Brain_Nucleus_accumbens_basal_ganglia||chr20_3213196_C_A||chr20:3209617:3213985:clu_23826:ENSG00000125877.12	Brain_Nucleus_accumbens_basal_ganglia||chr20_3213196_C_A||chr20:3209617:3213985:clu_23826:ENSG00000125877.12||CA-3704-3750-7301-7359-8117[INC][2/3][UPT]	CA-3704-3750-7301-7359-8117[INC][2/3][UPT]	chr20	3213196	3213169	3213226	3704	ITPA	exon	27	0	0.88858	-0.0642597	0.0642597
chr20_3213196_C_A	Brain_Putamen_basal_ganglia||chr20_3213196_C_A||chr20:3209617:3213985:clu_20974:ENSG00000125877.12	Brain_Putamen_basal_ganglia||chr20_3213196_C_A||chr20:3209617:3213985:clu_20974:ENSG00000125877.12||CA-3704-3750-7301-7359-8117[INC][2/3][UPT]	CA-3704-3750-7301-7359-8117[INC][2/3][UPT]	chr20	3213196	3213169	3213226	3704	ITPA	exon	27	0	0.88858	-0.0642597	0.0642597
chr5_178150922_C_T	Brain_Amygdala||chr5_178150922_C_T||chr5:178149838:178153491:clu_25954:ENSG00000145912.8	Brain_Amygdala||chr5_178150922_C_T||chr5:178149838:178153491:clu_25954:ENSG00000145912.8||CA-55651-3470-5967-6073-7122[INC][325/14][DNT]	CA-55651-3470-5967-6073-7122[INC][325/14][DNT]	chr5	178150922	178150888	178150993	55651	NHP2	exon	34	0	0.909009	-0.0619656	0.0619656
chr5_178150922_C_T	Brain_Anterior_cingulate_cortex_BA24||chr5_178150922_C_T||chr5:178149838:178153491:clu_27965:ENSG00000145912.8	Brain_Anterior_cingulate_cortex_BA24||chr5_178150922_C_T||chr5:178149838:178153491:clu_27965:ENSG00000145912.8||CA-55651-3470-5967-6073-7122[INC][325/14][DNT]	CA-55651-3470-5967-6073-7122[INC][325/14][DNT]	chr5	178150922	178150888	178150993	55651	NHP2	exon	34	0	0.909009	-0.0619656	0.0619656
chr5_178150922_C_T	Brain_Caudate_basal_ganglia||chr5_178150922_C_T||chr5:178149838:178153491:clu_31671:ENSG00000145912.8	Brain_Caudate_basal_ganglia||chr5_178150922_C_T||chr5:178149838:178153491:clu_31671:ENSG00000145912.8||CA-55651-3470-5967-6073-7122[INC][325/14][DNT]	CA-55651-3470-5967-6073-7122[INC][325/14][DNT]	chr5	178150922	178150888	178150993	55651	NHP2	exon	34	0	0.909009	-0.0619656	0.0619656
chr5_178150922_C_T	Brain_Cerebellar_Hemisphere||chr5_178150922_C_T||chr5:178149838:178153491:clu_33303:ENSG00000145912.8	Brain_Cerebellar_Hemisphere||chr5_178150922_C_T||chr5:178149838:178153491:clu_33303:ENSG00000145912.8||CA-55651-3470-5967-6073-7122[INC][325/14][DNT]	CA-55651-3470-5967-6073-7122[INC][325/14][DNT]	chr5	178150922	178150888	178150993	55651	NHP2	exon	34	0	0.909009	-0.0619656	0.0619656
chr5_178150922_C_T	Brain_Cerebellum||chr5_178150922_C_T||chr5:178149838:178153491:clu_34909:ENSG00000145912.8	Brain_Cerebellum||chr5_178150922_C_T||chr5:178149838:178153491:clu_34909:ENSG00000145912.8||CA-55651-3470-5967-6073-7122[INC][325/14][DNT]	CA-55651-3470-5967-6073-7122[INC][325/14][DNT]	chr5	178150922	178150888	178150993	55651	NHP2	exon	34	0	0.909009	-0.0619656	0.0619656
chr5_178150922_C_T	Brain_Cortex||chr5_178150922_C_T||chr5:178149838:178153491:clu_32630:ENSG00000145912.8	Brain_Cortex||chr5_178150922_C_T||chr5:178149838:178153491:clu_32630:ENSG00000145912.8||CA-55651-3470-5967-6073-7122[INC][325/14][DNT]	CA-55651-3470-5967-6073-7122[INC][325/14][DNT]	chr5	178150922	178150888	178150993	55651	NHP2	exon	34	0	0.909009	-0.0619656	0.0619656
chr5_178150922_C_T	Brain_Frontal_Cortex_BA9||chr5_178150922_C_T||chr5:178149838:178153491:clu_30310:ENSG00000145912.8	Brain_Frontal_Cortex_BA9||chr5_178150922_C_T||chr5:178149838:178153491:clu_30310:ENSG00000145912.8||CA-55651-3470-5967-6073-7122[INC][325/14][DNT]	CA-55651-3470-5967-6073-7122[INC][325/14][DNT]	chr5	178150922	178150888	178150993	55651	NHP2	exon	34	0	0.909009	-0.0619656	0.0619656
chr5_178150922_C_T	Brain_Hippocampus||chr5_178150922_C_T||chr5:178149838:178153491:clu_28842:ENSG00000145912.8	Brain_Hippocampus||chr5_178150922_C_T||chr5:178149838:178153491:clu_28842:ENSG00000145912.8||CA-55651-3470-5967-6073-7122[INC][325/14][DNT]	CA-55651-3470-5967-6073-7122[INC][325/14][DNT]	chr5	178150922	178150888	178150993	55651	NHP2	exon	34	0	0.909009	-0.0619656	0.0619656
chr5_178150922_C_T	Brain_Hypothalamus||chr5_178150922_C_T||chr5:178149838:178153491:clu_30932:ENSG00000145912.8	Brain_Hypothalamus||chr5_178150922_C_T||chr5:178149838:178153491:clu_30932:ENSG00000145912.8||CA-55651-3470-5967-6073-7122[INC][325/14][DNT]	CA-55651-3470-5967-6073-7122[INC][325/14][DNT]	chr5	178150922	178150888	178150993	55651	NHP2	exon	34	0	0.909009	-0.0619656	0.0619656
chr5_178150922_C_T	Brain_Nucleus_accumbens_basal_ganglia||chr5_178150922_C_T||chr5:178149838:178153491:clu_32401:ENSG00000145912.8	Brain_Nucleus_accumbens_basal_ganglia||chr5_178150922_C_T||chr5:178149838:178153491:clu_32401:ENSG00000145912.8||CA-55651-3470-5967-6073-7122[INC][325/14][DNT]	CA-55651-3470-5967-6073-7122[INC][325/14][DNT]	chr5	178150922	178150888	178150993	55651	NHP2	exon	34	0	0.909009	-0.0619656	0.0619656
chr5_178150922_C_T	Brain_Putamen_basal_ganglia||chr5_178150922_C_T||chr5:178149838:178153491:clu_28331:ENSG00000145912.8	Brain_Putamen_basal_ganglia||chr5_178150922_C_T||chr5:178149838:178153491:clu_28331:ENSG00000145912.8||CA-55651-3470-5967-6073-7122[INC][325/14][DNT]	CA-55651-3470-5967-6073-7122[INC][325/14][DNT]	chr5	178150922	178150888	178150993	55651	NHP2	exon	34	0	0.909009	-0.0619656	0.0619656
chr5_178150922_C_T	Brain_Spinal_cord_cervical_c-1||chr5_178150922_C_T||chr5:178149838:178153491:clu_27663:ENSG00000145912.8	Brain_Spinal_cord_cervical_c-1||chr5_178150922_C_T||chr5:178149838:178153491:clu_27663:ENSG00000145912.8||CA-55651-3470-5967-6073-7122[INC][325/14][DNT]	CA-55651-3470-5967-6073-7122[INC][325/14][DNT]	chr5	178150922	178150888	178150993	55651	NHP2	exon	34	0	0.909009	-0.0619656	0.0619656
chr12_121166053_C_G	Brain_Spinal_cord_cervical_c-1||chr12_121166053_C_G||chr12:121165437:121175388:clu_3954:ENSG00000089041.16	Brain_Spinal_cord_cervical_c-1||chr12_121166053_C_G||chr12:121165437:121175388:clu_3954:ENSG00000089041.16||CA-5027-35619-36239-36369-45569[INC][7/1]	CA-5027-35619-36239-36369-45569[INC][7/1]	chr12	121166053	121166058	121166187	5027	P2RX7	intron	5	0	0.946486	-0.0617992	0.0617992
chr6_30204736_A_C	Brain_Cortex||chr6_30204736_A_C||chr6:30201138:30213305:clu_28625:ENSG00000234127.8	Brain_Cortex||chr6_30204736_A_C||chr6:30201138:30213305:clu_28625:ENSG00000234127.8||CA-7726@0-3190-11729-11839-15356[INC][4/5][UPT]	CA-7726@0-3190-11729-11839-15356[INC][4/5][UPT]	chr6	30204736	30204656	30204765	7726	TRIM26	exon	29	0	0.372693	0.0616321	0.0616321
chr6_30204736_A_C	Brain_Frontal_Cortex_BA9||chr6_30204736_A_C||chr6:30201138:30213305:clu_26593:ENSG00000234127.8	Brain_Frontal_Cortex_BA9||chr6_30204736_A_C||chr6:30201138:30213305:clu_26593:ENSG00000234127.8||CA-7726@0-3190-11729-11839-15356[INC][4/5][UPT]	CA-7726@0-3190-11729-11839-15356[INC][4/5][UPT]	chr6	30204736	30204656	30204765	7726	TRIM26	exon	29	0	0.372693	0.0616321	0.0616321
chr6_30204736_A_C	Brain_Nucleus_accumbens_basal_ganglia||chr6_30204736_A_C||chr6:30201138:30213305:clu_28360:ENSG00000234127.8	Brain_Nucleus_accumbens_basal_ganglia||chr6_30204736_A_C||chr6:30201138:30213305:clu_28360:ENSG00000234127.8||CA-7726@0-3190-11729-11839-15356[INC][4/5][UPT]	CA-7726@0-3190-11729-11839-15356[INC][4/5][UPT]	chr6	30204736	30204656	30204765	7726	TRIM26	exon	29	0	0.372693	0.0616321	0.0616321
chr9_129834783_A_C	Brain_Cerebellar_Hemisphere||chr9_129834783_A_C||chr9:129833709:129835139:clu_48320:ENSG00000136819.15	Brain_Cerebellar_Hemisphere||chr9_129834783_A_C||chr9:129833709:129835139:clu_48320:ENSG00000136819.15||CA-51759-3155-3527-3587-4584[INC][133/7][UPT]	CA-51759-3155-3527-3587-4584[INC][133/7][UPT]	chr9	129834783	129834707	129834766	10868	USP20	intron	17	0	0.973219	-0.0614709	0.0614709
chr11_3361740_T_G	Brain_Cerebellar_Hemisphere||chr11_3361740_T_G||chr11:3360565:3370975:clu_5383:ENSG00000005801.16	Brain_Cerebellar_Hemisphere||chr11_3361740_T_G||chr11:3360565:3370975:clu_5383:ENSG00000005801.16||CA-7748-11248-20333-20426-21657[INC][2/43][DNT]	CA-7748-11248-20333-20426-21657[INC][2/43][DNT]	chr11	3361740	3361797	3361889	7748	ZNF195	intron	57	0	0.402854	-0.0610652	0.0610652
chr11_3361740_T_G	Brain_Cerebellum||chr11_3361740_T_G||chr11:3360565:3370975:clu_5627:ENSG00000005801.16	Brain_Cerebellum||chr11_3361740_T_G||chr11:3360565:3370975:clu_5627:ENSG00000005801.16||CA-7748-11248-20333-20426-21657[INC][2/43][DNT]	CA-7748-11248-20333-20426-21657[INC][2/43][DNT]	chr11	3361740	3361797	3361889	7748	ZNF195	intron	57	0	0.402854	-0.0610652	0.0610652
chr11_3361740_T_G	Brain_Frontal_Cortex_BA9||chr11_3361740_T_G||chr11:3360565:3370975:clu_4931:ENSG00000005801.16	Brain_Frontal_Cortex_BA9||chr11_3361740_T_G||chr11:3360565:3370975:clu_4931:ENSG00000005801.16||CA-7748-11248-20333-20426-21657[INC][2/43][DNT]	CA-7748-11248-20333-20426-21657[INC][2/43][DNT]	chr11	3361740	3361797	3361889	7748	ZNF195	intron	57	0	0.402854	-0.0610652	0.0610652
chr4_76280334_C_T	Brain_Anterior_cingulate_cortex_BA24||chr4_76280334_C_T||chr4:76278224:76283381:clu_28810:ENSG00000189157.13	Brain_Anterior_cingulate_cortex_BA24||chr4_76280334_C_T||chr4:76278224:76283381:clu_28810:ENSG00000189157.13||CA-100129583-67185-69224-69302-72341[INC][12/1][DNT]	CA-100129583-67185-69224-69302-72341[INC][12/1][DNT]	chr4	76280334	76280264	76280341	100129583	FAM47E	exon	7	0	0.552522	-0.0610192	0.0610192
chr4_76280334_C_T	Brain_Anterior_cingulate_cortex_BA24||chr4_76280334_C_T||chr4:76278224:76283381:clu_28810:ENSG00000118804.8	Brain_Anterior_cingulate_cortex_BA24||chr4_76280334_C_T||chr4:76278224:76283381:clu_28810:ENSG00000118804.8||CA-100129583-67185-69224-69302-72341[INC][12/1][DNT]	CA-100129583-67185-69224-69302-72341[INC][12/1][DNT]	chr4	76280334	76280264	76280341	100631383	FAM47E-STBD1	exon	7	0	0.552522	-0.0610192	0.0610192
chr4_76280334_C_T	Brain_Caudate_basal_ganglia||chr4_76280334_C_T||chr4:76278224:76283381:clu_32625:ENSG00000189157.13	Brain_Caudate_basal_ganglia||chr4_76280334_C_T||chr4:76278224:76283381:clu_32625:ENSG00000189157.13||CA-100129583-67185-69224-69302-72341[INC][12/1][DNT]	CA-100129583-67185-69224-69302-72341[INC][12/1][DNT]	chr4	76280334	76280264	76280341	100129583	FAM47E	exon	7	0	0.552522	-0.0610192	0.0610192
chr4_76280334_C_T	Brain_Caudate_basal_ganglia||chr4_76280334_C_T||chr4:76278224:76283381:clu_32625:ENSG00000118804.8	Brain_Caudate_basal_ganglia||chr4_76280334_C_T||chr4:76278224:76283381:clu_32625:ENSG00000118804.8||CA-100129583-67185-69224-69302-72341[INC][12/1][DNT]	CA-100129583-67185-69224-69302-72341[INC][12/1][DNT]	chr4	76280334	76280264	76280341	100129583	FAM47E	exon	7	0	0.552522	-0.0610192	0.0610192
chr4_76280334_C_T	Brain_Cerebellum||chr4_76280334_C_T||chr4:76278224:76283381:clu_35947:ENSG00000189157.13	Brain_Cerebellum||chr4_76280334_C_T||chr4:76278224:76283381:clu_35947:ENSG00000189157.13||CA-100129583-67185-69224-69302-72341[INC][12/1][DNT]	CA-100129583-67185-69224-69302-72341[INC][12/1][DNT]	chr4	76280334	76280264	76280341	100631383	FAM47E-STBD1	exon	7	0	0.552522	-0.0610192	0.0610192
chr4_76280334_C_T	Brain_Cerebellum||chr4_76280334_C_T||chr4:76278224:76283381:clu_35947:ENSG00000118804.8	Brain_Cerebellum||chr4_76280334_C_T||chr4:76278224:76283381:clu_35947:ENSG00000118804.8||CA-100129583-67185-69224-69302-72341[INC][12/1][DNT]	CA-100129583-67185-69224-69302-72341[INC][12/1][DNT]	chr4	76280334	76280264	76280341	100631383	FAM47E-STBD1	exon	7	0	0.552522	-0.0610192	0.0610192
chr4_76280334_C_T	Brain_Cortex||chr4_76280334_C_T||chr4:76278224:76283381:clu_33589:ENSG00000189157.13	Brain_Cortex||chr4_76280334_C_T||chr4:76278224:76283381:clu_33589:ENSG00000189157.13||CA-100129583-67185-69224-69302-72341[INC][12/1][DNT]	CA-100129583-67185-69224-69302-72341[INC][12/1][DNT]	chr4	76280334	76280264	76280341	100631383	FAM47E-STBD1	exon	7	0	0.552522	-0.0610192	0.0610192
chr4_76280334_C_T	Brain_Cortex||chr4_76280334_C_T||chr4:76278224:76283381:clu_33589:ENSG00000118804.8	Brain_Cortex||chr4_76280334_C_T||chr4:76278224:76283381:clu_33589:ENSG00000118804.8||CA-100129583-67185-69224-69302-72341[INC][12/1][DNT]	CA-100129583-67185-69224-69302-72341[INC][12/1][DNT]	chr4	76280334	76280264	76280341	100129583	FAM47E	exon	7	0	0.552522	-0.0610192	0.0610192
chr4_76280334_C_T	Brain_Frontal_Cortex_BA9||chr4_76280334_C_T||chr4:76278224:76283381:clu_31210:ENSG00000189157.13	Brain_Frontal_Cortex_BA9||chr4_76280334_C_T||chr4:76278224:76283381:clu_31210:ENSG00000189157.13||CA-100129583-67185-69224-69302-72341[INC][12/1][DNT]	CA-100129583-67185-69224-69302-72341[INC][12/1][DNT]	chr4	76280334	76280264	76280341	100631383	FAM47E-STBD1	exon	7	0	0.552522	-0.0610192	0.0610192
chr4_76280334_C_T	Brain_Frontal_Cortex_BA9||chr4_76280334_C_T||chr4:76278224:76283381:clu_31210:ENSG00000118804.8	Brain_Frontal_Cortex_BA9||chr4_76280334_C_T||chr4:76278224:76283381:clu_31210:ENSG00000118804.8||CA-100129583-67185-69224-69302-72341[INC][12/1][DNT]	CA-100129583-67185-69224-69302-72341[INC][12/1][DNT]	chr4	76280334	76280264	76280341	100631383	FAM47E-STBD1	exon	7	0	0.552522	-0.0610192	0.0610192
chr4_76280334_C_T	Brain_Hippocampus||chr4_76280334_C_T||chr4:76278224:76283381:clu_29696:ENSG00000189157.13	Brain_Hippocampus||chr4_76280334_C_T||chr4:76278224:76283381:clu_29696:ENSG00000189157.13||CA-100129583-67185-69224-69302-72341[INC][12/1][DNT]	CA-100129583-67185-69224-69302-72341[INC][12/1][DNT]	chr4	76280334	76280264	76280341	100129583	FAM47E	exon	7	0	0.552522	-0.0610192	0.0610192
chr4_76280334_C_T	Brain_Hippocampus||chr4_76280334_C_T||chr4:76278224:76283381:clu_29696:ENSG00000118804.8	Brain_Hippocampus||chr4_76280334_C_T||chr4:76278224:76283381:clu_29696:ENSG00000118804.8||CA-100129583-67185-69224-69302-72341[INC][12/1][DNT]	CA-100129583-67185-69224-69302-72341[INC][12/1][DNT]	chr4	76280334	76280264	76280341	100631383	FAM47E-STBD1	exon	7	0	0.552522	-0.0610192	0.0610192
chr4_76280334_C_T	Brain_Hypothalamus||chr4_76280334_C_T||chr4:76278224:76283381:clu_31865:ENSG00000189157.13	Brain_Hypothalamus||chr4_76280334_C_T||chr4:76278224:76283381:clu_31865:ENSG00000189157.13||CA-100129583-67185-69224-69302-72341[INC][12/1][DNT]	CA-100129583-67185-69224-69302-72341[INC][12/1][DNT]	chr4	76280334	76280264	76280341	100631383	FAM47E-STBD1	exon	7	0	0.552522	-0.0610192	0.0610192
chr4_76280334_C_T	Brain_Hypothalamus||chr4_76280334_C_T||chr4:76278224:76283381:clu_31865:ENSG00000118804.8	Brain_Hypothalamus||chr4_76280334_C_T||chr4:76278224:76283381:clu_31865:ENSG00000118804.8||CA-100129583-67185-69224-69302-72341[INC][12/1][DNT]	CA-100129583-67185-69224-69302-72341[INC][12/1][DNT]	chr4	76280334	76280264	76280341	100129583	FAM47E	exon	7	0	0.552522	-0.0610192	0.0610192
chr4_76280334_C_T	Brain_Nucleus_accumbens_basal_ganglia||chr4_76280334_C_T||chr4:76278224:76283381:clu_33413:ENSG00000189157.13	Brain_Nucleus_accumbens_basal_ganglia||chr4_76280334_C_T||chr4:76278224:76283381:clu_33413:ENSG00000189157.13||CA-100129583-67185-69224-69302-72341[INC][12/1][DNT]	CA-100129583-67185-69224-69302-72341[INC][12/1][DNT]	chr4	76280334	76280264	76280341	100129583	FAM47E	exon	7	0	0.552522	-0.0610192	0.0610192
chr4_76280334_C_T	Brain_Nucleus_accumbens_basal_ganglia||chr4_76280334_C_T||chr4:76278224:76283381:clu_33413:ENSG00000118804.8	Brain_Nucleus_accumbens_basal_ganglia||chr4_76280334_C_T||chr4:76278224:76283381:clu_33413:ENSG00000118804.8||CA-100129583-67185-69224-69302-72341[INC][12/1][DNT]	CA-100129583-67185-69224-69302-72341[INC][12/1][DNT]	chr4	76280334	76280264	76280341	100129583	FAM47E	exon	7	0	0.552522	-0.0610192	0.0610192
chr14_100374259_G_C	Brain_Cerebellar_Hemisphere||chr14_100374259_G_C||chr14:100369258:100376260:clu_19048:ENSG00000140105.17	Brain_Cerebellar_Hemisphere||chr14_100374259_G_C||chr14:100369258:100376260:clu_19048:ENSG00000140105.17||CA-7453-3084-5099-5208-10085[INC][4/371][UPT]	CA-7453-3084-5099-5208-10085[INC][4/371][UPT]	chr14	100374259	100374136	100374244	7453	WARS	intron	15	0	0.0958387	-0.0606631	0.0606631
chr14_100374259_G_C	Brain_Cerebellum||chr14_100374259_G_C||chr14:100369258:100376260:clu_19943:ENSG00000140105.17	Brain_Cerebellum||chr14_100374259_G_C||chr14:100369258:100376260:clu_19943:ENSG00000140105.17||CA-7453-3084-5099-5208-10085[INC][4/371][UPT]	CA-7453-3084-5099-5208-10085[INC][4/371][UPT]	chr14	100374259	100374136	100374244	7453	WARS	intron	15	0	0.0958387	-0.0606631	0.0606631
chr14_100374259_G_C	Brain_Nucleus_accumbens_basal_ganglia||chr14_100374259_G_C||chr14:100369258:100375283:clu_18385:ENSG00000140105.17	Brain_Nucleus_accumbens_basal_ganglia||chr14_100374259_G_C||chr14:100369258:100375283:clu_18385:ENSG00000140105.17||CA-7453-4061-5099-5208-10085[INC][38/736][UPT]	CA-7453-4061-5099-5208-10085[INC][38/736][UPT]	chr14	100374259	100374136	100374244	7453	WARS	intron	15	0	0.0958387	-0.0606631	0.0606631
chr14_100374259_G_C	Brain_Putamen_basal_ganglia||chr14_100374259_G_C||chr14:100369258:100375283:clu_16078:ENSG00000140105.17	Brain_Putamen_basal_ganglia||chr14_100374259_G_C||chr14:100369258:100375283:clu_16078:ENSG00000140105.17||CA-7453-4061-5099-5208-10085[INC][38/736][UPT]	CA-7453-4061-5099-5208-10085[INC][38/736][UPT]	chr14	100374259	100374136	100374244	7453	WARS	intron	15	0	0.0958387	-0.0606631	0.0606631
chr9_137367416_C_G	Brain_Amygdala||chr9_137367416_C_G||chr9:137366632:137367936:clu_38118:ENSG00000187609.15	Brain_Amygdala||chr9_137367416_C_G||chr9:137366632:137367936:clu_38118:ENSG00000187609.15||CA-54932-58327-58729-58879-59630[INC][1/32]	CA-54932-58327-58729-58879-59630[INC][1/32]	chr9	137367416	137367384	137367533	54932	EXD3	exon	32	0	0.0381523	0.0597117	0.0597117
chr9_137367416_C_G	Brain_Anterior_cingulate_cortex_BA24||chr9_137367416_C_G||chr9:137366632:137367936:clu_41139:ENSG00000187609.15	Brain_Anterior_cingulate_cortex_BA24||chr9_137367416_C_G||chr9:137366632:137367936:clu_41139:ENSG00000187609.15||CA-54932-58327-58729-58879-59630[INC][1/32]	CA-54932-58327-58729-58879-59630[INC][1/32]	chr9	137367416	137367384	137367533	54932	EXD3	exon	32	0	0.0381523	0.0597117	0.0597117
chr9_137367416_C_G	Brain_Caudate_basal_ganglia||chr9_137367416_C_G||chr9:137366632:137367936:clu_46652:ENSG00000187609.15	Brain_Caudate_basal_ganglia||chr9_137367416_C_G||chr9:137366632:137367936:clu_46652:ENSG00000187609.15||CA-54932-58327-58729-58879-59630[INC][1/32]	CA-54932-58327-58729-58879-59630[INC][1/32]	chr9	137367416	137367384	137367533	54932	EXD3	exon	32	0	0.0381523	0.0597117	0.0597117
chr9_137367416_C_G	Brain_Cerebellar_Hemisphere||chr9_137367416_C_G||chr9:137366632:137367936:clu_48828:ENSG00000187609.15	Brain_Cerebellar_Hemisphere||chr9_137367416_C_G||chr9:137366632:137367936:clu_48828:ENSG00000187609.15||CA-54932-58327-58729-58879-59630[INC][1/32]	CA-54932-58327-58729-58879-59630[INC][1/32]	chr9	137367416	137367384	137367533	54932	EXD3	exon	32	0	0.0381523	0.0597117	0.0597117
chr9_137367416_C_G	Brain_Cerebellum||chr9_137367416_C_G||chr9:137366632:137367936:clu_51350:ENSG00000187609.15	Brain_Cerebellum||chr9_137367416_C_G||chr9:137366632:137367936:clu_51350:ENSG00000187609.15||CA-54932-58327-58729-58879-59630[INC][1/32]	CA-54932-58327-58729-58879-59630[INC][1/32]	chr9	137367416	137367384	137367533	54932	EXD3	exon	32	0	0.0381523	0.0597117	0.0597117
chr9_137367416_C_G	Brain_Cortex||chr9_137367416_C_G||chr9:137366632:137367936:clu_47994:ENSG00000187609.15	Brain_Cortex||chr9_137367416_C_G||chr9:137366632:137367936:clu_47994:ENSG00000187609.15||CA-54932-58327-58729-58879-59630[INC][1/32]	CA-54932-58327-58729-58879-59630[INC][1/32]	chr9	137367416	137367384	137367533	54932	EXD3	exon	32	0	0.0381523	0.0597117	0.0597117
chr9_137367416_C_G	Brain_Frontal_Cortex_BA9||chr9_137367416_C_G||chr9:137366632:137367936:clu_44618:ENSG00000187609.15	Brain_Frontal_Cortex_BA9||chr9_137367416_C_G||chr9:137366632:137367936:clu_44618:ENSG00000187609.15||CA-54932-58327-58729-58879-59630[INC][1/32]	CA-54932-58327-58729-58879-59630[INC][1/32]	chr9	137367416	137367384	137367533	54932	EXD3	exon	32	0	0.0381523	0.0597117	0.0597117
chr9_137367416_C_G	Brain_Hippocampus||chr9_137367416_C_G||chr9:137366632:137367936:clu_42406:ENSG00000187609.15	Brain_Hippocampus||chr9_137367416_C_G||chr9:137366632:137367936:clu_42406:ENSG00000187609.15||CA-54932-58327-58729-58879-59630[INC][1/32]	CA-54932-58327-58729-58879-59630[INC][1/32]	chr9	137367416	137367384	137367533	54932	EXD3	exon	32	0	0.0381523	0.0597117	0.0597117
chr9_137367416_C_G	Brain_Hypothalamus||chr9_137367416_C_G||chr9:137366632:137367936:clu_45540:ENSG00000187609.15	Brain_Hypothalamus||chr9_137367416_C_G||chr9:137366632:137367936:clu_45540:ENSG00000187609.15||CA-54932-58327-58729-58879-59630[INC][1/32]	CA-54932-58327-58729-58879-59630[INC][1/32]	chr9	137367416	137367384	137367533	54932	EXD3	exon	32	0	0.0381523	0.0597117	0.0597117
chr9_137367416_C_G	Brain_Nucleus_accumbens_basal_ganglia||chr9_137367416_C_G||chr9:137366632:137367936:clu_47740:ENSG00000187609.15	Brain_Nucleus_accumbens_basal_ganglia||chr9_137367416_C_G||chr9:137366632:137367936:clu_47740:ENSG00000187609.15||CA-54932-58327-58729-58879-59630[INC][1/32]	CA-54932-58327-58729-58879-59630[INC][1/32]	chr9	137367416	137367384	137367533	54932	EXD3	exon	32	0	0.0381523	0.0597117	0.0597117
chr9_137367416_C_G	Brain_Putamen_basal_ganglia||chr9_137367416_C_G||chr9:137366632:137367936:clu_41563:ENSG00000187609.15	Brain_Putamen_basal_ganglia||chr9_137367416_C_G||chr9:137366632:137367936:clu_41563:ENSG00000187609.15||CA-54932-58327-58729-58879-59630[INC][1/32]	CA-54932-58327-58729-58879-59630[INC][1/32]	chr9	137367416	137367384	137367533	54932	EXD3	exon	32	0	0.0381523	0.0597117	0.0597117
chr9_137367416_C_G	Brain_Spinal_cord_cervical_c-1||chr9_137367416_C_G||chr9:137366632:137367936:clu_40523:ENSG00000187609.15	Brain_Spinal_cord_cervical_c-1||chr9_137367416_C_G||chr9:137366632:137367936:clu_40523:ENSG00000187609.15||CA-54932-58327-58729-58879-59630[INC][1/32]	CA-54932-58327-58729-58879-59630[INC][1/32]	chr9	137367416	137367384	137367533	54932	EXD3	exon	32	0	0.0381523	0.0597117	0.0597117
chr9_137367416_C_G	Brain_Substantia_nigra||chr9_137367416_C_G||chr9:137366632:137367936:clu_36477:ENSG00000187609.15	Brain_Substantia_nigra||chr9_137367416_C_G||chr9:137366632:137367936:clu_36477:ENSG00000187609.15||CA-54932-58327-58729-58879-59630[INC][1/32]	CA-54932-58327-58729-58879-59630[INC][1/32]	chr9	137367416	137367384	137367533	54932	EXD3	exon	32	0	0.0381523	0.0597117	0.0597117
chr7_42937190_A_G	Brain_Amygdala||chr7_42937190_A_G||chr7:42935136:42937322:clu_21132:ENSG00000106591.3	Brain_Amygdala||chr7_42937190_A_G||chr7:42935136:42937322:clu_21132:ENSG00000106591.3||CA-64983-5797-7824-7902-7982[INC][4/113][DNT]	CA-64983-5797-7824-7902-7982[INC][4/113][DNT]	chr7	42937190	42937164	42937241	64983	MRPL32	exon	26	0	0.0577134	0.0588888	0.0588888
chr7_42937190_A_G	Brain_Anterior_cingulate_cortex_BA24||chr7_42937190_A_G||chr7:42935136:42937322:clu_22727:ENSG00000106591.3	Brain_Anterior_cingulate_cortex_BA24||chr7_42937190_A_G||chr7:42935136:42937322:clu_22727:ENSG00000106591.3||CA-64983-5797-7824-7902-7982[INC][4/113][DNT]	CA-64983-5797-7824-7902-7982[INC][4/113][DNT]	chr7	42937190	42937164	42937241	64983	MRPL32	exon	26	0	0.0577134	0.0588888	0.0588888
chr7_42937190_A_G	Brain_Caudate_basal_ganglia||chr7_42937190_A_G||chr7:42935136:42937322:clu_25664:ENSG00000106591.3	Brain_Caudate_basal_ganglia||chr7_42937190_A_G||chr7:42935136:42937322:clu_25664:ENSG00000106591.3||CA-64983-5797-7824-7902-7982[INC][4/113][DNT]	CA-64983-5797-7824-7902-7982[INC][4/113][DNT]	chr7	42937190	42937164	42937241	64983	MRPL32	exon	26	0	0.0577134	0.0588888	0.0588888
chr7_42937190_A_G	Brain_Cerebellum||chr7_42937190_A_G||chr7:42935136:42937322:clu_28382:ENSG00000106591.3	Brain_Cerebellum||chr7_42937190_A_G||chr7:42935136:42937322:clu_28382:ENSG00000106591.3||CA-64983-5797-7824-7902-7982[INC][4/113][DNT]	CA-64983-5797-7824-7902-7982[INC][4/113][DNT]	chr7	42937190	42937164	42937241	64983	MRPL32	exon	26	0	0.0577134	0.0588888	0.0588888
chr7_42937190_A_G	Brain_Cortex||chr7_42937190_A_G||chr7:42935136:42937322:clu_26460:ENSG00000106591.3	Brain_Cortex||chr7_42937190_A_G||chr7:42935136:42937322:clu_26460:ENSG00000106591.3||CA-64983-5797-7824-7902-7982[INC][4/113][DNT]	CA-64983-5797-7824-7902-7982[INC][4/113][DNT]	chr7	42937190	42937164	42937241	64983	MRPL32	exon	26	0	0.0577134	0.0588888	0.0588888
chr7_42937190_A_G	Brain_Frontal_Cortex_BA9||chr7_42937190_A_G||chr7:42935136:42937322:clu_24565:ENSG00000106591.3	Brain_Frontal_Cortex_BA9||chr7_42937190_A_G||chr7:42935136:42937322:clu_24565:ENSG00000106591.3||CA-64983-5797-7824-7902-7982[INC][4/113][DNT]	CA-64983-5797-7824-7902-7982[INC][4/113][DNT]	chr7	42937190	42937164	42937241	64983	MRPL32	exon	26	0	0.0577134	0.0588888	0.0588888
chr7_42937190_A_G	Brain_Hippocampus||chr7_42937190_A_G||chr7:42935136:42937322:clu_23410:ENSG00000106591.3	Brain_Hippocampus||chr7_42937190_A_G||chr7:42935136:42937322:clu_23410:ENSG00000106591.3||CA-64983-5797-7824-7902-7982[INC][4/113][DNT]	CA-64983-5797-7824-7902-7982[INC][4/113][DNT]	chr7	42937190	42937164	42937241	64983	MRPL32	exon	26	0	0.0577134	0.0588888	0.0588888
chr7_42937190_A_G	Brain_Hypothalamus||chr7_42937190_A_G||chr7:42935136:42937322:clu_25075:ENSG00000106591.3	Brain_Hypothalamus||chr7_42937190_A_G||chr7:42935136:42937322:clu_25075:ENSG00000106591.3||CA-64983-5797-7824-7902-7982[INC][4/113][DNT]	CA-64983-5797-7824-7902-7982[INC][4/113][DNT]	chr7	42937190	42937164	42937241	64983	MRPL32	exon	26	0	0.0577134	0.0588888	0.0588888
chr7_42937190_A_G	Brain_Nucleus_accumbens_basal_ganglia||chr7_42937190_A_G||chr7:42935136:42937322:clu_26195:ENSG00000106591.3	Brain_Nucleus_accumbens_basal_ganglia||chr7_42937190_A_G||chr7:42935136:42937322:clu_26195:ENSG00000106591.3||CA-64983-5797-7824-7902-7982[INC][4/113][DNT]	CA-64983-5797-7824-7902-7982[INC][4/113][DNT]	chr7	42937190	42937164	42937241	64983	MRPL32	exon	26	0	0.0577134	0.0588888	0.0588888
chr2_272051_C_T	Brain_Amygdala||chr2_272051_C_T||chr2:271939:272192:clu_29799:ENSG00000143727.15	Brain_Amygdala||chr2_272051_C_T||chr2:271939:272192:clu_29799:ENSG00000143727.15||CA-52-10071-10168-10197-10323[INC][28/72]	CA-52-10071-10168-10197-10323[INC][28/72]	chr2	272051	272037	272065	52	ACP1	exon	14	0	0.390013	-0.0584442	0.0584442
chr2_272051_C_T	Brain_Anterior_cingulate_cortex_BA24||chr2_272051_C_T||chr2:271939:272192:clu_32166:ENSG00000143727.15	Brain_Anterior_cingulate_cortex_BA24||chr2_272051_C_T||chr2:271939:272192:clu_32166:ENSG00000143727.15||CA-52-10071-10168-10197-10323[INC][28/72]	CA-52-10071-10168-10197-10323[INC][28/72]	chr2	272051	272037	272065	52	ACP1	exon	14	0	0.390013	-0.0584442	0.0584442
chr2_272051_C_T	Brain_Caudate_basal_ganglia||chr2_272051_C_T||chr2:271939:272192:clu_36444:ENSG00000143727.15	Brain_Caudate_basal_ganglia||chr2_272051_C_T||chr2:271939:272192:clu_36444:ENSG00000143727.15||CA-52-10071-10168-10197-10323[INC][28/72]	CA-52-10071-10168-10197-10323[INC][28/72]	chr2	272051	272037	272065	52	ACP1	exon	14	0	0.390013	-0.0584442	0.0584442
chr2_272051_C_T	Brain_Cerebellar_Hemisphere||chr2_272051_C_T||chr2:271939:272192:clu_38087:ENSG00000143727.15	Brain_Cerebellar_Hemisphere||chr2_272051_C_T||chr2:271939:272192:clu_38087:ENSG00000143727.15||CA-52-10071-10168-10197-10323[INC][28/72]	CA-52-10071-10168-10197-10323[INC][28/72]	chr2	272051	272037	272065	52	ACP1	exon	14	0	0.390013	-0.0584442	0.0584442
chr2_272051_C_T	Brain_Cerebellum||chr2_272051_C_T||chr2:271939:272192:clu_40015:ENSG00000143727.15	Brain_Cerebellum||chr2_272051_C_T||chr2:271939:272192:clu_40015:ENSG00000143727.15||CA-52-10071-10168-10197-10323[INC][28/72]	CA-52-10071-10168-10197-10323[INC][28/72]	chr2	272051	272037	272065	52	ACP1	exon	14	0	0.390013	-0.0584442	0.0584442
chr2_272051_C_T	Brain_Cortex||chr2_272051_C_T||chr2:271939:272192:clu_37471:ENSG00000143727.15	Brain_Cortex||chr2_272051_C_T||chr2:271939:272192:clu_37471:ENSG00000143727.15||CA-52-10071-10168-10197-10323[INC][28/72]	CA-52-10071-10168-10197-10323[INC][28/72]	chr2	272051	272037	272065	52	ACP1	exon	14	0	0.390013	-0.0584442	0.0584442
chr2_272051_C_T	Brain_Frontal_Cortex_BA9||chr2_272051_C_T||chr2:271939:272192:clu_34888:ENSG00000143727.15	Brain_Frontal_Cortex_BA9||chr2_272051_C_T||chr2:271939:272192:clu_34888:ENSG00000143727.15||CA-52-10071-10168-10197-10323[INC][28/72]	CA-52-10071-10168-10197-10323[INC][28/72]	chr2	272051	272037	272065	52	ACP1	exon	14	0	0.390013	-0.0584442	0.0584442
chr2_272051_C_T	Brain_Hippocampus||chr2_272051_C_T||chr2:271939:272192:clu_33100:ENSG00000143727.15	Brain_Hippocampus||chr2_272051_C_T||chr2:271939:272192:clu_33100:ENSG00000143727.15||CA-52-10071-10168-10197-10323[INC][28/72]	CA-52-10071-10168-10197-10323[INC][28/72]	chr2	272051	272037	272065	52	ACP1	exon	14	0	0.390013	-0.0584442	0.0584442
chr2_272051_C_T	Brain_Hypothalamus||chr2_272051_C_T||chr2:271939:272192:clu_35547:ENSG00000143727.15	Brain_Hypothalamus||chr2_272051_C_T||chr2:271939:272192:clu_35547:ENSG00000143727.15||CA-52-10071-10168-10197-10323[INC][28/72]	CA-52-10071-10168-10197-10323[INC][28/72]	chr2	272051	272037	272065	52	ACP1	exon	14	0	0.390013	-0.0584442	0.0584442
chr2_272051_C_T	Brain_Nucleus_accumbens_basal_ganglia||chr2_272051_C_T||chr2:271939:272192:clu_37308:ENSG00000143727.15	Brain_Nucleus_accumbens_basal_ganglia||chr2_272051_C_T||chr2:271939:272192:clu_37308:ENSG00000143727.15||CA-52-10071-10168-10197-10323[INC][28/72]	CA-52-10071-10168-10197-10323[INC][28/72]	chr2	272051	272037	272065	52	ACP1	exon	14	0	0.390013	-0.0584442	0.0584442
chr2_272051_C_T	Brain_Putamen_basal_ganglia||chr2_272051_C_T||chr2:271939:272192:clu_32515:ENSG00000143727.15	Brain_Putamen_basal_ganglia||chr2_272051_C_T||chr2:271939:272192:clu_32515:ENSG00000143727.15||CA-52-10071-10168-10197-10323[INC][28/72]	CA-52-10071-10168-10197-10323[INC][28/72]	chr2	272051	272037	272065	52	ACP1	exon	14	0	0.390013	-0.0584442	0.0584442
chr2_272051_C_T	Brain_Spinal_cord_cervical_c-1||chr2_272051_C_T||chr2:271939:272192:clu_31713:ENSG00000143727.15	Brain_Spinal_cord_cervical_c-1||chr2_272051_C_T||chr2:271939:272192:clu_31713:ENSG00000143727.15||CA-52-10071-10168-10197-10323[INC][28/72]	CA-52-10071-10168-10197-10323[INC][28/72]	chr2	272051	272037	272065	52	ACP1	exon	14	0	0.390013	-0.0584442	0.0584442
chr2_272051_C_T	Brain_Substantia_nigra||chr2_272051_C_T||chr2:271939:272192:clu_28572:ENSG00000143727.15	Brain_Substantia_nigra||chr2_272051_C_T||chr2:271939:272192:clu_28572:ENSG00000143727.15||CA-52-10071-10168-10197-10323[INC][28/72]	CA-52-10071-10168-10197-10323[INC][28/72]	chr2	272051	272037	272065	52	ACP1	exon	14	0	0.390013	-0.0584442	0.0584442
chr11_33731476_G_A	Brain_Cerebellum||chr11_33731476_G_A||chr11:33722463:33736382:clu_6097:ENSG00000085063.14	Brain_Cerebellum||chr11_33731476_G_A||chr11:33722463:33736382:clu_6097:ENSG00000085063.14||CA-966-3098-8011-8056-17016[INC][285/633][UPT]	CA-966-3098-8011-8056-17016[INC][285/633][UPT]	chr11	33731476	33731424	33731468	966	CD59	intron	8	0	0.407992	0.0582516	0.0582516
chr3_56565131_T_C	Brain_Cerebellum||chr3_56565131_T_C||chr3:56564125:56566594:clu_38344:ENSG00000180376.16	Brain_Cerebellum||chr3_56565131_T_C||chr3:56564125:56566594:clu_38344:ENSG00000180376.16||CA-285331-9970-10978-11049-12438[INC][7/80]	CA-285331-9970-10978-11049-12438[INC][7/80]	chr3	56565131	56565134	56565204	285331	CCDC66	intron	3	0	0.0155423	0.0581622	0.0581622
chr2_224919_A_G	Brain_Anterior_cingulate_cortex_BA24||chr2_224919_A_G||chr2:219001:229966:clu_32160:ENSG00000035115.21	Brain_Anterior_cingulate_cortex_BA24||chr2_224919_A_G||chr2:219001:229966:clu_32160:ENSG00000035115.21||CA-26751-37901-42946-42999-48865[INC][2/34][DNT]	CA-26751-37901-42946-42999-48865[INC][2/34][DNT]	chr2	224919	224868	224920	26751	SH3YL1	exon	1	0	0.234116	-0.0580749	0.0580749
chr2_224919_A_G	Brain_Caudate_basal_ganglia||chr2_224919_A_G||chr2:219001:229966:clu_36438:ENSG00000035115.21	Brain_Caudate_basal_ganglia||chr2_224919_A_G||chr2:219001:229966:clu_36438:ENSG00000035115.21||CA-26751-37901-42946-42999-48865[INC][2/34][DNT]	CA-26751-37901-42946-42999-48865[INC][2/34][DNT]	chr2	224919	224868	224920	26751	SH3YL1	exon	1	0	0.234116	-0.0580749	0.0580749
chr2_224919_A_G	Brain_Cerebellar_Hemisphere||chr2_224919_A_G||chr2:219001:229966:clu_38081:ENSG00000035115.21	Brain_Cerebellar_Hemisphere||chr2_224919_A_G||chr2:219001:229966:clu_38081:ENSG00000035115.21||CA-26751-37901-42946-42999-48865[INC][2/34][DNT]	CA-26751-37901-42946-42999-48865[INC][2/34][DNT]	chr2	224919	224868	224920	26751	SH3YL1	exon	1	0	0.234116	-0.0580749	0.0580749
chr2_224919_A_G	Brain_Cerebellum||chr2_224919_A_G||chr2:219001:229966:clu_40009:ENSG00000035115.21	Brain_Cerebellum||chr2_224919_A_G||chr2:219001:229966:clu_40009:ENSG00000035115.21||CA-26751-37901-42946-42999-48865[INC][2/34][DNT]	CA-26751-37901-42946-42999-48865[INC][2/34][DNT]	chr2	224919	224868	224920	26751	SH3YL1	exon	1	0	0.234116	-0.0580749	0.0580749
chr2_224919_A_G	Brain_Cortex||chr2_224919_A_G||chr2:219001:229966:clu_37466:ENSG00000035115.21	Brain_Cortex||chr2_224919_A_G||chr2:219001:229966:clu_37466:ENSG00000035115.21||CA-26751-37901-42946-42999-48865[INC][2/34][DNT]	CA-26751-37901-42946-42999-48865[INC][2/34][DNT]	chr2	224919	224868	224920	26751	SH3YL1	exon	1	0	0.234116	-0.0580749	0.0580749
chr2_224919_A_G	Brain_Frontal_Cortex_BA9||chr2_224919_A_G||chr2:219001:229966:clu_34882:ENSG00000035115.21	Brain_Frontal_Cortex_BA9||chr2_224919_A_G||chr2:219001:229966:clu_34882:ENSG00000035115.21||CA-26751-37901-42946-42999-48865[INC][2/34][DNT]	CA-26751-37901-42946-42999-48865[INC][2/34][DNT]	chr2	224919	224868	224920	26751	SH3YL1	exon	1	0	0.234116	-0.0580749	0.0580749
chr2_224919_A_G	Brain_Nucleus_accumbens_basal_ganglia||chr2_224919_A_G||chr2:219001:229966:clu_37302:ENSG00000035115.21	Brain_Nucleus_accumbens_basal_ganglia||chr2_224919_A_G||chr2:219001:229966:clu_37302:ENSG00000035115.21||CA-26751-37901-42946-42999-48865[INC][2/34][DNT]	CA-26751-37901-42946-42999-48865[INC][2/34][DNT]	chr2	224919	224868	224920	26751	SH3YL1	exon	1	0	0.234116	-0.0580749	0.0580749
chr2_224919_A_G	Brain_Spinal_cord_cervical_c-1||chr2_224919_A_G||chr2:219001:229966:clu_31707:ENSG00000035115.21	Brain_Spinal_cord_cervical_c-1||chr2_224919_A_G||chr2:219001:229966:clu_31707:ENSG00000035115.21||CA-26751-37901-42946-42999-48865[INC][2/34][DNT]	CA-26751-37901-42946-42999-48865[INC][2/34][DNT]	chr2	224919	224868	224920	26751	SH3YL1	exon	1	0	0.234116	-0.0580749	0.0580749
chr7_67203897_C_T	Brain_Hypothalamus||chr7_67203897_C_T||chr7:67195337:67238308:clu_25360:ENSG00000198874.12	Brain_Hypothalamus||chr7_67203897_C_T||chr7:67195337:67238308:clu_25360:ENSG00000198874.12||CA-55253-201533-209939-210095-244503[INC][2/15][DNT]	CA-55253-201533-209939-210095-244503[INC][2/15][DNT]	chr7	67203897	67203744	67203899	55253	TYW1	exon	2	0	0.0945073	-0.0568265	0.0568265
chr21_44908184_T_C	Brain_Amygdala||chr21_44908184_T_C||chr21:44907095:44910284:clu_20570:ENSG00000160255.17	Brain_Amygdala||chr21_44908184_T_C||chr21:44907095:44910284:clu_20570:ENSG00000160255.17||CA-3689-21590-23691-23800-24778[INC][1/781]	CA-3689-21590-23691-23800-24778[INC][1/781]	chr21	44908184	44908074	44908182	3689	ITGB2	intron	2	1	0.056905	-0.0567523	0.0567523
chr21_44908184_T_C	Brain_Anterior_cingulate_cortex_BA24||chr21_44908184_T_C||chr21:44907095:44910284:clu_22113:ENSG00000160255.17	Brain_Anterior_cingulate_cortex_BA24||chr21_44908184_T_C||chr21:44907095:44910284:clu_22113:ENSG00000160255.17||CA-3689-21590-23691-23800-24778[INC][1/781]	CA-3689-21590-23691-23800-24778[INC][1/781]	chr21	44908184	44908074	44908182	3689	ITGB2	intron	2	1	0.056905	-0.0567523	0.0567523
chr21_44908184_T_C	Brain_Caudate_basal_ganglia||chr21_44908184_T_C||chr21:44907095:44910284:clu_24942:ENSG00000160255.17	Brain_Caudate_basal_ganglia||chr21_44908184_T_C||chr21:44907095:44910284:clu_24942:ENSG00000160255.17||CA-3689-21590-23691-23800-24778[INC][1/781]	CA-3689-21590-23691-23800-24778[INC][1/781]	chr21	44908184	44908074	44908182	3689	ITGB2	intron	2	1	0.056905	-0.0567523	0.0567523
chr21_44908184_T_C	Brain_Cerebellar_Hemisphere||chr21_44908184_T_C||chr21:44907095:44910284:clu_26421:ENSG00000160255.17	Brain_Cerebellar_Hemisphere||chr21_44908184_T_C||chr21:44907095:44910284:clu_26421:ENSG00000160255.17||CA-3689-21590-23691-23800-24778[INC][1/781]	CA-3689-21590-23691-23800-24778[INC][1/781]	chr21	44908184	44908074	44908182	3689	ITGB2	intron	2	1	0.056905	-0.0567523	0.0567523
chr21_44908184_T_C	Brain_Cortex||chr21_44908184_T_C||chr21:44907095:44910284:clu_25744:ENSG00000160255.17	Brain_Cortex||chr21_44908184_T_C||chr21:44907095:44910284:clu_25744:ENSG00000160255.17||CA-3689-21590-23691-23800-24778[INC][1/781]	CA-3689-21590-23691-23800-24778[INC][1/781]	chr21	44908184	44908074	44908182	3689	ITGB2	intron	2	1	0.056905	-0.0567523	0.0567523
chr21_44908184_T_C	Brain_Frontal_Cortex_BA9||chr21_44908184_T_C||chr21:44907095:44910284:clu_23889:ENSG00000160255.17	Brain_Frontal_Cortex_BA9||chr21_44908184_T_C||chr21:44907095:44910284:clu_23889:ENSG00000160255.17||CA-3689-21590-23691-23800-24778[INC][1/781]	CA-3689-21590-23691-23800-24778[INC][1/781]	chr21	44908184	44908074	44908182	3689	ITGB2	intron	2	1	0.056905	-0.0567523	0.0567523
chr21_44908184_T_C	Brain_Hippocampus||chr21_44908184_T_C||chr21:44907095:44910284:clu_22769:ENSG00000160255.17	Brain_Hippocampus||chr21_44908184_T_C||chr21:44907095:44910284:clu_22769:ENSG00000160255.17||CA-3689-21590-23691-23800-24778[INC][1/781]	CA-3689-21590-23691-23800-24778[INC][1/781]	chr21	44908184	44908074	44908182	3689	ITGB2	intron	2	1	0.056905	-0.0567523	0.0567523
chr21_44908184_T_C	Brain_Hypothalamus||chr21_44908184_T_C||chr21:44907095:44910284:clu_24364:ENSG00000160255.17	Brain_Hypothalamus||chr21_44908184_T_C||chr21:44907095:44910284:clu_24364:ENSG00000160255.17||CA-3689-21590-23691-23800-24778[INC][1/781]	CA-3689-21590-23691-23800-24778[INC][1/781]	chr21	44908184	44908074	44908182	3689	ITGB2	intron	2	1	0.056905	-0.0567523	0.0567523
chr21_44908184_T_C	Brain_Nucleus_accumbens_basal_ganglia||chr21_44908184_T_C||chr21:44907095:44910284:clu_25477:ENSG00000160255.17	Brain_Nucleus_accumbens_basal_ganglia||chr21_44908184_T_C||chr21:44907095:44910284:clu_25477:ENSG00000160255.17||CA-3689-21590-23691-23800-24778[INC][1/781]	CA-3689-21590-23691-23800-24778[INC][1/781]	chr21	44908184	44908074	44908182	3689	ITGB2	intron	2	1	0.056905	-0.0567523	0.0567523
chr21_44908184_T_C	Brain_Putamen_basal_ganglia||chr21_44908184_T_C||chr21:44907095:44910284:clu_22412:ENSG00000160255.17	Brain_Putamen_basal_ganglia||chr21_44908184_T_C||chr21:44907095:44910284:clu_22412:ENSG00000160255.17||CA-3689-21590-23691-23800-24778[INC][1/781]	CA-3689-21590-23691-23800-24778[INC][1/781]	chr21	44908184	44908074	44908182	3689	ITGB2	intron	2	1	0.056905	-0.0567523	0.0567523
chr21_44908184_T_C	Brain_Spinal_cord_cervical_c-1||chr21_44908184_T_C||chr21:44907095:44910284:clu_21776:ENSG00000160255.17	Brain_Spinal_cord_cervical_c-1||chr21_44908184_T_C||chr21:44907095:44910284:clu_21776:ENSG00000160255.17||CA-3689-21590-23691-23800-24778[INC][1/781]	CA-3689-21590-23691-23800-24778[INC][1/781]	chr21	44908184	44908074	44908182	3689	ITGB2	intron	2	1	0.056905	-0.0567523	0.0567523
chr21_44908184_T_C	Brain_Substantia_nigra||chr21_44908184_T_C||chr21:44907095:44910284:clu_19728:ENSG00000160255.17	Brain_Substantia_nigra||chr21_44908184_T_C||chr21:44907095:44910284:clu_19728:ENSG00000160255.17||CA-3689-21590-23691-23800-24778[INC][1/781]	CA-3689-21590-23691-23800-24778[INC][1/781]	chr21	44908184	44908074	44908182	3689	ITGB2	intron	2	1	0.056905	-0.0567523	0.0567523
chr19_7542022_G_C	Brain_Amygdala||chr19_7542022_G_C||chr19:7541684:7542561:clu_15365:ENSG00000032444.15	Brain_Amygdala||chr19_7542022_G_C||chr19:7541684:7542561:clu_15365:ENSG00000032444.15||CA-10908-10533-10832-10916-11409[INC][29/2]	CA-10908-10533-10832-10916-11409[INC][29/2]	chr19	7542022	7541984	7542067	10908	PNPLA6	exon	38	0	0.815467	-0.0563432	0.0563432
chr19_7542022_G_C	Brain_Anterior_cingulate_cortex_BA24||chr19_7542022_G_C||chr19:7541684:7542561:clu_16537:ENSG00000032444.15	Brain_Anterior_cingulate_cortex_BA24||chr19_7542022_G_C||chr19:7541684:7542561:clu_16537:ENSG00000032444.15||CA-10908-10533-10832-10916-11409[INC][29/2]	CA-10908-10533-10832-10916-11409[INC][29/2]	chr19	7542022	7541984	7542067	10908	PNPLA6	exon	38	0	0.815467	-0.0563432	0.0563432
chr19_7542022_G_C	Brain_Caudate_basal_ganglia||chr19_7542022_G_C||chr19:7541684:7542561:clu_18731:ENSG00000032444.15	Brain_Caudate_basal_ganglia||chr19_7542022_G_C||chr19:7541684:7542561:clu_18731:ENSG00000032444.15||CA-10908-10533-10832-10916-11409[INC][29/2]	CA-10908-10533-10832-10916-11409[INC][29/2]	chr19	7542022	7541984	7542067	10908	PNPLA6	exon	38	0	0.815467	-0.0563432	0.0563432
chr19_7542022_G_C	Brain_Cerebellar_Hemisphere||chr19_7542022_G_C||chr19:7541684:7542561:clu_19877:ENSG00000032444.15	Brain_Cerebellar_Hemisphere||chr19_7542022_G_C||chr19:7541684:7542561:clu_19877:ENSG00000032444.15||CA-10908-10533-10832-10916-11409[INC][29/2]	CA-10908-10533-10832-10916-11409[INC][29/2]	chr19	7542022	7541984	7542067	10908	PNPLA6	exon	38	0	0.815467	-0.0563432	0.0563432
chr19_7542022_G_C	Brain_Cerebellum||chr19_7542022_G_C||chr19:7541684:7542561:clu_20822:ENSG00000032444.15	Brain_Cerebellum||chr19_7542022_G_C||chr19:7541684:7542561:clu_20822:ENSG00000032444.15||CA-10908-10533-10832-10916-11409[INC][29/2]	CA-10908-10533-10832-10916-11409[INC][29/2]	chr19	7542022	7541984	7542067	10908	PNPLA6	exon	38	0	0.815467	-0.0563432	0.0563432
chr19_7542022_G_C	Brain_Cortex||chr19_7542022_G_C||chr19:7541684:7542561:clu_19285:ENSG00000032444.15	Brain_Cortex||chr19_7542022_G_C||chr19:7541684:7542561:clu_19285:ENSG00000032444.15||CA-10908-10533-10832-10916-11409[INC][29/2]	CA-10908-10533-10832-10916-11409[INC][29/2]	chr19	7542022	7541984	7542067	10908	PNPLA6	exon	38	0	0.815467	-0.0563432	0.0563432
chr19_7542022_G_C	Brain_Frontal_Cortex_BA9||chr19_7542022_G_C||chr19:7541684:7542561:clu_17873:ENSG00000032444.15	Brain_Frontal_Cortex_BA9||chr19_7542022_G_C||chr19:7541684:7542561:clu_17873:ENSG00000032444.15||CA-10908-10533-10832-10916-11409[INC][29/2]	CA-10908-10533-10832-10916-11409[INC][29/2]	chr19	7542022	7541984	7542067	10908	PNPLA6	exon	38	0	0.815467	-0.0563432	0.0563432
chr19_7542022_G_C	Brain_Hippocampus||chr19_7542022_G_C||chr19:7541684:7542561:clu_17068:ENSG00000032444.15	Brain_Hippocampus||chr19_7542022_G_C||chr19:7541684:7542561:clu_17068:ENSG00000032444.15||CA-10908-10533-10832-10916-11409[INC][29/2]	CA-10908-10533-10832-10916-11409[INC][29/2]	chr19	7542022	7541984	7542067	10908	PNPLA6	exon	38	0	0.815467	-0.0563432	0.0563432
chr19_7542022_G_C	Brain_Hypothalamus||chr19_7542022_G_C||chr19:7541684:7542561:clu_18285:ENSG00000032444.15	Brain_Hypothalamus||chr19_7542022_G_C||chr19:7541684:7542561:clu_18285:ENSG00000032444.15||CA-10908-10533-10832-10916-11409[INC][29/2]	CA-10908-10533-10832-10916-11409[INC][29/2]	chr19	7542022	7541984	7542067	10908	PNPLA6	exon	38	0	0.815467	-0.0563432	0.0563432
chr19_7542022_G_C	Brain_Nucleus_accumbens_basal_ganglia||chr19_7542022_G_C||chr19:7541684:7542561:clu_19142:ENSG00000032444.15	Brain_Nucleus_accumbens_basal_ganglia||chr19_7542022_G_C||chr19:7541684:7542561:clu_19142:ENSG00000032444.15||CA-10908-10533-10832-10916-11409[INC][29/2]	CA-10908-10533-10832-10916-11409[INC][29/2]	chr19	7542022	7541984	7542067	10908	PNPLA6	exon	38	0	0.815467	-0.0563432	0.0563432
chr19_7542022_G_C	Brain_Putamen_basal_ganglia||chr19_7542022_G_C||chr19:7541684:7542561:clu_16762:ENSG00000032444.15	Brain_Putamen_basal_ganglia||chr19_7542022_G_C||chr19:7541684:7542561:clu_16762:ENSG00000032444.15||CA-10908-10533-10832-10916-11409[INC][29/2]	CA-10908-10533-10832-10916-11409[INC][29/2]	chr19	7542022	7541984	7542067	10908	PNPLA6	exon	38	0	0.815467	-0.0563432	0.0563432
chr19_7542022_G_C	Brain_Substantia_nigra||chr19_7542022_G_C||chr19:7541684:7542561:clu_14751:ENSG00000032444.15	Brain_Substantia_nigra||chr19_7542022_G_C||chr19:7541684:7542561:clu_14751:ENSG00000032444.15||CA-10908-10533-10832-10916-11409[INC][29/2]	CA-10908-10533-10832-10916-11409[INC][29/2]	chr19	7542022	7541984	7542067	10908	PNPLA6	exon	38	0	0.815467	-0.0563432	0.0563432
chr6_87330681_T_G	Brain_Amygdala||chr6_87330681_T_G||chr6:87322632:87337009:clu_23763:ENSG00000111850.10	Brain_Amygdala||chr6_87330681_T_G||chr6:87322632:87337009:clu_23763:ENSG00000111850.10||CA-57150-3045-11104-11125-17421[INC][2/25][UPT]	CA-57150-3045-11104-11125-17421[INC][2/25][UPT]	chr6	87330681	87330692	87330712	57150	C6orf162	intron	11	0	0.505399	0.055956	0.055956
chr6_87330681_T_G	Brain_Anterior_cingulate_cortex_BA24||chr6_87330681_T_G||chr6:87322632:87337009:clu_25559:ENSG00000111850.10	Brain_Anterior_cingulate_cortex_BA24||chr6_87330681_T_G||chr6:87322632:87337009:clu_25559:ENSG00000111850.10||CA-57150-3045-11104-11125-17421[INC][2/25][UPT]	CA-57150-3045-11104-11125-17421[INC][2/25][UPT]	chr6	87330681	87330692	87330712	57150	C6orf162	intron	11	0	0.505399	0.055956	0.055956
chr6_87330681_T_G	Brain_Caudate_basal_ganglia||chr6_87330681_T_G||chr6:87322632:87337009:clu_28867:ENSG00000111850.10	Brain_Caudate_basal_ganglia||chr6_87330681_T_G||chr6:87322632:87337009:clu_28867:ENSG00000111850.10||CA-57150-3045-11104-11125-17421[INC][2/25][UPT]	CA-57150-3045-11104-11125-17421[INC][2/25][UPT]	chr6	87330681	87330692	87330712	63914	C6orf164	intron	11	0	0.505399	0.055956	0.055956
chr6_87330681_T_G	Brain_Cortex||chr6_87330681_T_G||chr6:87322632:87337009:clu_29764:ENSG00000111850.10	Brain_Cortex||chr6_87330681_T_G||chr6:87322632:87337009:clu_29764:ENSG00000111850.10||CA-57150-3045-11104-11125-17421[INC][2/25][UPT]	CA-57150-3045-11104-11125-17421[INC][2/25][UPT]	chr6	87330681	87330692	87330712	63914	C6orf164	intron	11	0	0.505399	0.055956	0.055956
chr6_87330681_T_G	Brain_Frontal_Cortex_BA9||chr6_87330681_T_G||chr6:87322632:87337009:clu_27647:ENSG00000111850.10	Brain_Frontal_Cortex_BA9||chr6_87330681_T_G||chr6:87322632:87337009:clu_27647:ENSG00000111850.10||CA-57150-3045-11104-11125-17421[INC][2/25][UPT]	CA-57150-3045-11104-11125-17421[INC][2/25][UPT]	chr6	87330681	87330692	87330712	57150	C6orf162	intron	11	0	0.505399	0.055956	0.055956
chr6_87330681_T_G	Brain_Hippocampus||chr6_87330681_T_G||chr6:87322632:87337009:clu_26319:ENSG00000111850.10	Brain_Hippocampus||chr6_87330681_T_G||chr6:87322632:87337009:clu_26319:ENSG00000111850.10||CA-57150-3045-11104-11125-17421[INC][2/25][UPT]	CA-57150-3045-11104-11125-17421[INC][2/25][UPT]	chr6	87330681	87330692	87330712	57150	C6orf162	intron	11	0	0.505399	0.055956	0.055956
chr6_87330681_T_G	Brain_Hypothalamus||chr6_87330681_T_G||chr6:87322632:87337009:clu_28216:ENSG00000111850.10	Brain_Hypothalamus||chr6_87330681_T_G||chr6:87322632:87337009:clu_28216:ENSG00000111850.10||CA-57150-3045-11104-11125-17421[INC][2/25][UPT]	CA-57150-3045-11104-11125-17421[INC][2/25][UPT]	chr6	87330681	87330692	87330712	63914	C6orf164	intron	11	0	0.505399	0.055956	0.055956
chr6_87330681_T_G	Brain_Nucleus_accumbens_basal_ganglia||chr6_87330681_T_G||chr6:87322632:87337009:clu_29458:ENSG00000111850.10	Brain_Nucleus_accumbens_basal_ganglia||chr6_87330681_T_G||chr6:87322632:87337009:clu_29458:ENSG00000111850.10||CA-57150-3045-11104-11125-17421[INC][2/25][UPT]	CA-57150-3045-11104-11125-17421[INC][2/25][UPT]	chr6	87330681	87330692	87330712	63914	C6orf164	intron	11	0	0.505399	0.055956	0.055956
chr2_69423598_G_A	Brain_Cerebellum||chr2_69423598_G_A||chr2:69419604:69431902:clu_41103:ENSG00000169599.12	Brain_Cerebellum||chr2_69423598_G_A||chr2:69419604:69431902:clu_41103:ENSG00000169599.12||CA-27247-8727-16911-17047-21024[INC][64/14]	CA-27247-8727-16911-17047-21024[INC][64/14]	chr2	69423598	69423582	69423717	27247	NFU1	exon	16	0	0.827364	-0.0557106	0.0557106
chr12_133193510_G_A	Brain_Cerebellum||chr12_133193510_G_A||chr12:133192003:133202144:clu_5402:ENSG00000090612.20	Brain_Cerebellum||chr12_133193510_G_A||chr12:133192003:133202144:clu_5402:ENSG00000090612.20||CA-10795-13595-15019-15125-23735[INC][12/20][DNT]	CA-10795-13595-15019-15125-23735[INC][12/20][DNT]	chr12	133193510	133193428	133193533	10795	ZNF268	exon	23	0	0.416334	-0.0556077	0.0556077
chr4_952438_T_C	Brain_Cerebellar_Hemisphere||chr4_952438_T_C||chr4:951717:953190:clu_33512:ENSG00000127419.16	Brain_Cerebellar_Hemisphere||chr4_952438_T_C||chr4:951717:953190:clu_33512:ENSG00000127419.16||CA-84286-22331-22980-23064-23803[INC][69/3]	CA-84286-22331-22980-23064-23803[INC][69/3]	chr4	952438	952367	952450	84286	TMEM175	exon	12	0	0.922024	0.0549274	0.0549274
chr4_952438_T_C	Brain_Cerebellum||chr4_952438_T_C||chr4:951717:953190:clu_35135:ENSG00000127419.16	Brain_Cerebellum||chr4_952438_T_C||chr4:951717:953190:clu_35135:ENSG00000127419.16||CA-84286-22331-22980-23064-23803[INC][69/3]	CA-84286-22331-22980-23064-23803[INC][69/3]	chr4	952438	952367	952450	84286	TMEM175	exon	12	0	0.922024	0.0549274	0.0549274
chr4_952438_T_C	Brain_Cortex||chr4_952438_T_C||chr4:951717:953190:clu_32826:ENSG00000127419.16	Brain_Cortex||chr4_952438_T_C||chr4:951717:953190:clu_32826:ENSG00000127419.16||CA-84286-22331-22980-23064-23803[INC][69/3]	CA-84286-22331-22980-23064-23803[INC][69/3]	chr4	952438	952367	952450	84286	TMEM175	exon	12	0	0.922024	0.0549274	0.0549274
chr4_952438_T_C	Brain_Frontal_Cortex_BA9||chr4_952438_T_C||chr4:951717:953190:clu_30487:ENSG00000127419.16	Brain_Frontal_Cortex_BA9||chr4_952438_T_C||chr4:951717:953190:clu_30487:ENSG00000127419.16||CA-84286-22331-22980-23064-23803[INC][69/3]	CA-84286-22331-22980-23064-23803[INC][69/3]	chr4	952438	952367	952450	84286	TMEM175	exon	12	0	0.922024	0.0549274	0.0549274
chr4_952438_T_C	Brain_Hypothalamus||chr4_952438_T_C||chr4:951717:953190:clu_31105:ENSG00000127419.16	Brain_Hypothalamus||chr4_952438_T_C||chr4:951717:953190:clu_31105:ENSG00000127419.16||CA-84286-22331-22980-23064-23803[INC][69/3]	CA-84286-22331-22980-23064-23803[INC][69/3]	chr4	952438	952367	952450	84286	TMEM175	exon	12	0	0.922024	0.0549274	0.0549274
chr4_952438_T_C	Brain_Nucleus_accumbens_basal_ganglia||chr4_952438_T_C||chr4:951717:953190:clu_32584:ENSG00000127419.16	Brain_Nucleus_accumbens_basal_ganglia||chr4_952438_T_C||chr4:951717:953190:clu_32584:ENSG00000127419.16||CA-84286-22331-22980-23064-23803[INC][69/3]	CA-84286-22331-22980-23064-23803[INC][69/3]	chr4	952438	952367	952450	84286	TMEM175	exon	12	0	0.922024	0.0549274	0.0549274
chr4_952438_T_C	Brain_Putamen_basal_ganglia||chr4_952438_T_C||chr4:951717:953190:clu_28495:ENSG00000127419.16	Brain_Putamen_basal_ganglia||chr4_952438_T_C||chr4:951717:953190:clu_28495:ENSG00000127419.16||CA-84286-22331-22980-23064-23803[INC][69/3]	CA-84286-22331-22980-23064-23803[INC][69/3]	chr4	952438	952367	952450	84286	TMEM175	exon	12	0	0.922024	0.0549274	0.0549274
chr16_69714966_G_A	Brain_Amygdala||chr16_69714966_G_A||chr16:69713129:69718123:clu_11865:ENSG00000181019.12	Brain_Amygdala||chr16_69714966_G_A||chr16:69713129:69718123:clu_11865:ENSG00000181019.12||CA-1728-11546-14591-14705-16539[INC][338/66]	CA-1728-11546-14591-14705-16539[INC][338/66]	chr16	69714966	69714964	69715077	1728	NQO1	exon	2	0	0.830115	-0.0546637	0.0546637
chr16_69714966_G_A	Brain_Anterior_cingulate_cortex_BA24||chr16_69714966_G_A||chr16:69713129:69718123:clu_12758:ENSG00000181019.12	Brain_Anterior_cingulate_cortex_BA24||chr16_69714966_G_A||chr16:69713129:69718123:clu_12758:ENSG00000181019.12||CA-1728-11546-14591-14705-16539[INC][338/66]	CA-1728-11546-14591-14705-16539[INC][338/66]	chr16	69714966	69714964	69715077	1728	NQO1	exon	2	0	0.830115	-0.0546637	0.0546637
chr16_69714966_G_A	Brain_Caudate_basal_ganglia||chr16_69714966_G_A||chr16:69713129:69718123:clu_14433:ENSG00000181019.12	Brain_Caudate_basal_ganglia||chr16_69714966_G_A||chr16:69713129:69718123:clu_14433:ENSG00000181019.12||CA-1728-11546-14591-14705-16539[INC][338/66]	CA-1728-11546-14591-14705-16539[INC][338/66]	chr16	69714966	69714964	69715077	1728	NQO1	exon	2	0	0.830115	-0.0546637	0.0546637
chr16_69714966_G_A	Brain_Cerebellar_Hemisphere||chr16_69714966_G_A||chr16:69713129:69718123:clu_15242:ENSG00000181019.12	Brain_Cerebellar_Hemisphere||chr16_69714966_G_A||chr16:69713129:69718123:clu_15242:ENSG00000181019.12||CA-1728-11546-14591-14705-16539[INC][338/66]	CA-1728-11546-14591-14705-16539[INC][338/66]	chr16	69714966	69714964	69715077	1728	NQO1	exon	2	0	0.830115	-0.0546637	0.0546637
chr16_69714966_G_A	Brain_Cerebellum||chr16_69714966_G_A||chr16:69713129:69718123:clu_15921:ENSG00000181019.12	Brain_Cerebellum||chr16_69714966_G_A||chr16:69713129:69718123:clu_15921:ENSG00000181019.12||CA-1728-11546-14591-14705-16539[INC][338/66]	CA-1728-11546-14591-14705-16539[INC][338/66]	chr16	69714966	69714964	69715077	1728	NQO1	exon	2	0	0.830115	-0.0546637	0.0546637
chr16_69714966_G_A	Brain_Cortex||chr16_69714966_G_A||chr16:69713129:69718123:clu_14926:ENSG00000181019.12	Brain_Cortex||chr16_69714966_G_A||chr16:69713129:69718123:clu_14926:ENSG00000181019.12||CA-1728-11546-14591-14705-16539[INC][338/66]	CA-1728-11546-14591-14705-16539[INC][338/66]	chr16	69714966	69714964	69715077	1728	NQO1	exon	2	0	0.830115	-0.0546637	0.0546637
chr16_69714966_G_A	Brain_Frontal_Cortex_BA9||chr16_69714966_G_A||chr16:69713129:69718123:clu_13801:ENSG00000181019.12	Brain_Frontal_Cortex_BA9||chr16_69714966_G_A||chr16:69713129:69718123:clu_13801:ENSG00000181019.12||CA-1728-11546-14591-14705-16539[INC][338/66]	CA-1728-11546-14591-14705-16539[INC][338/66]	chr16	69714966	69714964	69715077	1728	NQO1	exon	2	0	0.830115	-0.0546637	0.0546637
chr16_69714966_G_A	Brain_Hippocampus||chr16_69714966_G_A||chr16:69713129:69718123:clu_13178:ENSG00000181019.12	Brain_Hippocampus||chr16_69714966_G_A||chr16:69713129:69718123:clu_13178:ENSG00000181019.12||CA-1728-11546-14591-14705-16539[INC][338/66]	CA-1728-11546-14591-14705-16539[INC][338/66]	chr16	69714966	69714964	69715077	1728	NQO1	exon	2	0	0.830115	-0.0546637	0.0546637
chr16_69714966_G_A	Brain_Hypothalamus||chr16_69714966_G_A||chr16:69713129:69718123:clu_14073:ENSG00000181019.12	Brain_Hypothalamus||chr16_69714966_G_A||chr16:69713129:69718123:clu_14073:ENSG00000181019.12||CA-1728-11546-14591-14705-16539[INC][338/66]	CA-1728-11546-14591-14705-16539[INC][338/66]	chr16	69714966	69714964	69715077	1728	NQO1	exon	2	0	0.830115	-0.0546637	0.0546637
chr16_69714966_G_A	Brain_Nucleus_accumbens_basal_ganglia||chr16_69714966_G_A||chr16:69713129:69718123:clu_14750:ENSG00000181019.12	Brain_Nucleus_accumbens_basal_ganglia||chr16_69714966_G_A||chr16:69713129:69718123:clu_14750:ENSG00000181019.12||CA-1728-11546-14591-14705-16539[INC][338/66]	CA-1728-11546-14591-14705-16539[INC][338/66]	chr16	69714966	69714964	69715077	1728	NQO1	exon	2	0	0.830115	-0.0546637	0.0546637
chr16_69714966_G_A	Brain_Putamen_basal_ganglia||chr16_69714966_G_A||chr16:69713129:69718123:clu_12936:ENSG00000181019.12	Brain_Putamen_basal_ganglia||chr16_69714966_G_A||chr16:69713129:69718123:clu_12936:ENSG00000181019.12||CA-1728-11546-14591-14705-16539[INC][338/66]	CA-1728-11546-14591-14705-16539[INC][338/66]	chr16	69714966	69714964	69715077	1728	NQO1	exon	2	0	0.830115	-0.0546637	0.0546637
chr16_69714966_G_A	Brain_Spinal_cord_cervical_c-1||chr16_69714966_G_A||chr16:69713129:69718123:clu_12651:ENSG00000181019.12	Brain_Spinal_cord_cervical_c-1||chr16_69714966_G_A||chr16:69713129:69718123:clu_12651:ENSG00000181019.12||CA-1728-11546-14591-14705-16539[INC][338/66]	CA-1728-11546-14591-14705-16539[INC][338/66]	chr16	69714966	69714964	69715077	1728	NQO1	exon	2	0	0.830115	-0.0546637	0.0546637
chr16_69714966_G_A	Brain_Substantia_nigra||chr16_69714966_G_A||chr16:69713129:69718123:clu_11420:ENSG00000181019.12	Brain_Substantia_nigra||chr16_69714966_G_A||chr16:69713129:69718123:clu_11420:ENSG00000181019.12||CA-1728-11546-14591-14705-16539[INC][338/66]	CA-1728-11546-14591-14705-16539[INC][338/66]	chr16	69714966	69714964	69715077	1728	NQO1	exon	2	0	0.830115	-0.0546637	0.0546637
chr17_7559652_A_G	Brain_Putamen_basal_ganglia||chr17_7559652_A_G||chr17:7559297:7559846:clu_9090:ENSG00000161955.16	Brain_Putamen_basal_ganglia||chr17_7559652_A_G||chr17:7559297:7559846:clu_9090:ENSG00000161955.16||CA-8741-13240-13566-13645-13788[INC][64/1]	CA-8741-13240-13566-13645-13788[INC][64/1]	chr17	7559652	7559624	7559702	407977	TNFSF12-TNFSF13	exon	28	0	0.819856	-0.0543396	0.0543396
chr6_34757881_G_T	Brain_Amygdala||chr6_34757881_G_T||chr6:34757551:34762595:clu_23204:ENSG00000124562.9	Brain_Amygdala||chr6_34757881_G_T||chr6:34757551:34762595:clu_23204:ENSG00000124562.9||CA-6631-3458-3818-3861-8501[INC][156/5][UPT]	CA-6631-3458-3818-3861-8501[INC][156/5][UPT]	chr6	34757881	34757912	34757954	6631	SNRPC	intron	31	0	0.800888	0.0543095	0.0543095
chr6_34757881_G_T	Brain_Anterior_cingulate_cortex_BA24||chr6_34757881_G_T||chr6:34757551:34762595:clu_24939:ENSG00000124562.9	Brain_Anterior_cingulate_cortex_BA24||chr6_34757881_G_T||chr6:34757551:34762595:clu_24939:ENSG00000124562.9||CA-6631-3458-3818-3861-8501[INC][156/5][UPT]	CA-6631-3458-3818-3861-8501[INC][156/5][UPT]	chr6	34757881	34757912	34757954	6631	SNRPC	intron	31	0	0.800888	0.0543095	0.0543095
chr6_34757881_G_T	Brain_Caudate_basal_ganglia||chr6_34757881_G_T||chr6:34757551:34762595:clu_28179:ENSG00000124562.9	Brain_Caudate_basal_ganglia||chr6_34757881_G_T||chr6:34757551:34762595:clu_28179:ENSG00000124562.9||CA-6631-3458-3818-3861-8501[INC][156/5][UPT]	CA-6631-3458-3818-3861-8501[INC][156/5][UPT]	chr6	34757881	34757912	34757954	6631	SNRPC	intron	31	0	0.800888	0.0543095	0.0543095
chr6_34757881_G_T	Brain_Cerebellar_Hemisphere||chr6_34757881_G_T||chr6:34757551:34762595:clu_29763:ENSG00000124562.9	Brain_Cerebellar_Hemisphere||chr6_34757881_G_T||chr6:34757551:34762595:clu_29763:ENSG00000124562.9||CA-6631-3458-3818-3861-8501[INC][156/5][UPT]	CA-6631-3458-3818-3861-8501[INC][156/5][UPT]	chr6	34757881	34757912	34757954	6631	SNRPC	intron	31	0	0.800888	0.0543095	0.0543095
chr6_34757881_G_T	Brain_Cerebellum||chr6_34757881_G_T||chr6:34757551:34762595:clu_31170:ENSG00000124562.9	Brain_Cerebellum||chr6_34757881_G_T||chr6:34757551:34762595:clu_31170:ENSG00000124562.9||CA-6631-3458-3818-3861-8501[INC][156/5][UPT]	CA-6631-3458-3818-3861-8501[INC][156/5][UPT]	chr6	34757881	34757912	34757954	6631	SNRPC	intron	31	0	0.800888	0.0543095	0.0543095
chr6_34757881_G_T	Brain_Cortex||chr6_34757881_G_T||chr6:34757551:34762595:clu_29022:ENSG00000124562.9	Brain_Cortex||chr6_34757881_G_T||chr6:34757551:34762595:clu_29022:ENSG00000124562.9||CA-6631-3458-3818-3861-8501[INC][156/5][UPT]	CA-6631-3458-3818-3861-8501[INC][156/5][UPT]	chr6	34757881	34757912	34757954	6631	SNRPC	intron	31	0	0.800888	0.0543095	0.0543095
chr6_34757881_G_T	Brain_Frontal_Cortex_BA9||chr6_34757881_G_T||chr6:34757551:34762595:clu_26954:ENSG00000124562.9	Brain_Frontal_Cortex_BA9||chr6_34757881_G_T||chr6:34757551:34762595:clu_26954:ENSG00000124562.9||CA-6631-3458-3818-3861-8501[INC][156/5][UPT]	CA-6631-3458-3818-3861-8501[INC][156/5][UPT]	chr6	34757881	34757912	34757954	6631	SNRPC	intron	31	0	0.800888	0.0543095	0.0543095
chr6_34757881_G_T	Brain_Hippocampus||chr6_34757881_G_T||chr6:34757551:34762595:clu_25684:ENSG00000124562.9	Brain_Hippocampus||chr6_34757881_G_T||chr6:34757551:34762595:clu_25684:ENSG00000124562.9||CA-6631-3458-3818-3861-8501[INC][156/5][UPT]	CA-6631-3458-3818-3861-8501[INC][156/5][UPT]	chr6	34757881	34757912	34757954	6631	SNRPC	intron	31	0	0.800888	0.0543095	0.0543095
chr6_34757881_G_T	Brain_Nucleus_accumbens_basal_ganglia||chr6_34757881_G_T||chr6:34757551:34762595:clu_28749:ENSG00000124562.9	Brain_Nucleus_accumbens_basal_ganglia||chr6_34757881_G_T||chr6:34757551:34762595:clu_28749:ENSG00000124562.9||CA-6631-3458-3818-3861-8501[INC][156/5][UPT]	CA-6631-3458-3818-3861-8501[INC][156/5][UPT]	chr6	34757881	34757912	34757954	6631	SNRPC	intron	31	0	0.800888	0.0543095	0.0543095
chr6_34757881_G_T	Brain_Putamen_basal_ganglia||chr6_34757881_G_T||chr6:34757551:34762595:clu_25309:ENSG00000124562.9	Brain_Putamen_basal_ganglia||chr6_34757881_G_T||chr6:34757551:34762595:clu_25309:ENSG00000124562.9||CA-6631-3458-3818-3861-8501[INC][156/5][UPT]	CA-6631-3458-3818-3861-8501[INC][156/5][UPT]	chr6	34757881	34757912	34757954	6631	SNRPC	intron	31	0	0.800888	0.0543095	0.0543095
chr1_31728046_T_C	Brain_Amygdala||chr1_31728046_T_C||chr1:31727605:31728182:clu_33484:ENSG00000121753.12	Brain_Amygdala||chr1_31728046_T_C||chr1:31727605:31728182:clu_33484:ENSG00000121753.12||CA-576-38882-38982-39039-39458[INC][32/8][DNT]	CA-576-38882-38982-39039-39458[INC][32/8][DNT]	chr1	31728046	31728025	31728081	576	BAI2	exon	21	0	0.76697	-0.0540934	0.0540934
chr1_31728046_T_C	Brain_Caudate_basal_ganglia||chr1_31728046_T_C||chr1:31727605:31728182:clu_40984:ENSG00000121753.12	Brain_Caudate_basal_ganglia||chr1_31728046_T_C||chr1:31727605:31728182:clu_40984:ENSG00000121753.12||CA-576-38882-38982-39039-39458[INC][32/8][DNT]	CA-576-38882-38982-39039-39458[INC][32/8][DNT]	chr1	31728046	31728025	31728081	576	BAI2	exon	21	0	0.76697	-0.0540934	0.0540934
chr1_31728046_T_C	Brain_Cerebellar_Hemisphere||chr1_31728046_T_C||chr1:31727605:31728182:clu_42765:ENSG00000121753.12	Brain_Cerebellar_Hemisphere||chr1_31728046_T_C||chr1:31727605:31728182:clu_42765:ENSG00000121753.12||CA-576-38882-38982-39039-39458[INC][32/8][DNT]	CA-576-38882-38982-39039-39458[INC][32/8][DNT]	chr1	31728046	31728025	31728081	576	BAI2	exon	21	0	0.76697	-0.0540934	0.0540934
chr1_31728046_T_C	Brain_Cerebellum||chr1_31728046_T_C||chr1:31727605:31728182:clu_44978:ENSG00000121753.12	Brain_Cerebellum||chr1_31728046_T_C||chr1:31727605:31728182:clu_44978:ENSG00000121753.12||CA-576-38882-38982-39039-39458[INC][32/8][DNT]	CA-576-38882-38982-39039-39458[INC][32/8][DNT]	chr1	31728046	31728025	31728081	576	BAI2	exon	21	0	0.76697	-0.0540934	0.0540934
chr1_31728046_T_C	Brain_Cortex||chr1_31728046_T_C||chr1:31727605:31728182:clu_42131:ENSG00000121753.12	Brain_Cortex||chr1_31728046_T_C||chr1:31727605:31728182:clu_42131:ENSG00000121753.12||CA-576-38882-38982-39039-39458[INC][32/8][DNT]	CA-576-38882-38982-39039-39458[INC][32/8][DNT]	chr1	31728046	31728025	31728081	576	BAI2	exon	21	0	0.76697	-0.0540934	0.0540934
chr1_31728046_T_C	Brain_Frontal_Cortex_BA9||chr1_31728046_T_C||chr1:31727605:31728182:clu_39190:ENSG00000121753.12	Brain_Frontal_Cortex_BA9||chr1_31728046_T_C||chr1:31727605:31728182:clu_39190:ENSG00000121753.12||CA-576-38882-38982-39039-39458[INC][32/8][DNT]	CA-576-38882-38982-39039-39458[INC][32/8][DNT]	chr1	31728046	31728025	31728081	576	BAI2	exon	21	0	0.76697	-0.0540934	0.0540934
chr1_31728046_T_C	Brain_Hippocampus||chr1_31728046_T_C||chr1:31727605:31728182:clu_37229:ENSG00000121753.12	Brain_Hippocampus||chr1_31728046_T_C||chr1:31727605:31728182:clu_37229:ENSG00000121753.12||CA-576-38882-38982-39039-39458[INC][32/8][DNT]	CA-576-38882-38982-39039-39458[INC][32/8][DNT]	chr1	31728046	31728025	31728081	576	BAI2	exon	21	0	0.76697	-0.0540934	0.0540934
chr1_31728046_T_C	Brain_Hypothalamus||chr1_31728046_T_C||chr1:31727605:31728182:clu_39961:ENSG00000121753.12	Brain_Hypothalamus||chr1_31728046_T_C||chr1:31727605:31728182:clu_39961:ENSG00000121753.12||CA-576-38882-38982-39039-39458[INC][32/8][DNT]	CA-576-38882-38982-39039-39458[INC][32/8][DNT]	chr1	31728046	31728025	31728081	576	BAI2	exon	21	0	0.76697	-0.0540934	0.0540934
chr1_31728046_T_C	Brain_Nucleus_accumbens_basal_ganglia||chr1_31728046_T_C||chr1:31727605:31728182:clu_41968:ENSG00000121753.12	Brain_Nucleus_accumbens_basal_ganglia||chr1_31728046_T_C||chr1:31727605:31728182:clu_41968:ENSG00000121753.12||CA-576-38882-38982-39039-39458[INC][32/8][DNT]	CA-576-38882-38982-39039-39458[INC][32/8][DNT]	chr1	31728046	31728025	31728081	576	BAI2	exon	21	0	0.76697	-0.0540934	0.0540934
chr1_31728046_T_C	Brain_Putamen_basal_ganglia||chr1_31728046_T_C||chr1:31727605:31728182:clu_36543:ENSG00000121753.12	Brain_Putamen_basal_ganglia||chr1_31728046_T_C||chr1:31727605:31728182:clu_36543:ENSG00000121753.12||CA-576-38882-38982-39039-39458[INC][32/8][DNT]	CA-576-38882-38982-39039-39458[INC][32/8][DNT]	chr1	31728046	31728025	31728081	576	BAI2	exon	21	0	0.76697	-0.0540934	0.0540934
chr1_31728046_T_C	Brain_Substantia_nigra||chr1_31728046_T_C||chr1:31727605:31728182:clu_32055:ENSG00000121753.12	Brain_Substantia_nigra||chr1_31728046_T_C||chr1:31727605:31728182:clu_32055:ENSG00000121753.12||CA-576-38882-38982-39039-39458[INC][32/8][DNT]	CA-576-38882-38982-39039-39458[INC][32/8][DNT]	chr1	31728046	31728025	31728081	576	BAI2	exon	21	0	0.76697	-0.0540934	0.0540934
chr19_3855479_T_C	Brain_Amygdala||chr19_3855479_T_C||chr19:3852614:3868965:clu_15172:ENSG00000105278.10	Brain_Amygdala||chr19_3855479_T_C||chr19:3852614:3868965:clu_15172:ENSG00000105278.10||CA-23217-3065-16470-16628-19415[INC][4/3][UPT][DNT]	CA-23217-3065-16470-16628-19415[INC][4/3][UPT][DNT]	chr19	3855479	3855402	3855559	23217	ZFR2	exon	77	0	0.525879	0.0530572	0.0530572
chr19_3855479_T_C	Brain_Caudate_basal_ganglia||chr19_3855479_T_C||chr19:3834983:3868965:clu_18517:ENSG00000105278.10	Brain_Caudate_basal_ganglia||chr19_3855479_T_C||chr19:3834983:3868965:clu_18517:ENSG00000105278.10||CA-23217-3065-16470-16628-37046[INC][1/5][UPT]	CA-23217-3065-16470-16628-37046[INC][1/5][UPT]	chr19	3855479	3855402	3855559	23217	ZFR2	exon	77	0	0.525879	0.0530572	0.0530572
chr19_3855479_T_C	Brain_Cerebellum||chr19_3855479_T_C||chr19:3834983:3868965:clu_20572:ENSG00000105278.10	Brain_Cerebellum||chr19_3855479_T_C||chr19:3834983:3868965:clu_20572:ENSG00000105278.10||CA-23217-3065-16470-16628-37046[INC][1/5][UPT]	CA-23217-3065-16470-16628-37046[INC][1/5][UPT]	chr19	3855479	3855402	3855559	23217	ZFR2	exon	77	0	0.525879	0.0530572	0.0530572
chr19_3855479_T_C	Brain_Cortex||chr19_3855479_T_C||chr19:3834983:3868965:clu_19062:ENSG00000105278.10	Brain_Cortex||chr19_3855479_T_C||chr19:3834983:3868965:clu_19062:ENSG00000105278.10||CA-23217-3065-16470-16628-37046[INC][1/5][UPT]	CA-23217-3065-16470-16628-37046[INC][1/5][UPT]	chr19	3855479	3855402	3855559	23217	ZFR2	exon	77	0	0.525879	0.0530572	0.0530572
chr19_3855479_T_C	Brain_Frontal_Cortex_BA9||chr19_3855479_T_C||chr19:3852614:3868965:clu_17661:ENSG00000105278.10	Brain_Frontal_Cortex_BA9||chr19_3855479_T_C||chr19:3852614:3868965:clu_17661:ENSG00000105278.10||CA-23217-3065-16470-16628-19415[INC][4/3][UPT][DNT]	CA-23217-3065-16470-16628-19415[INC][4/3][UPT][DNT]	chr19	3855479	3855402	3855559	23217	ZFR2	exon	77	0	0.525879	0.0530572	0.0530572
chr19_3855479_T_C	Brain_Nucleus_accumbens_basal_ganglia||chr19_3855479_T_C||chr19:3834983:3868965:clu_18931:ENSG00000105278.10	Brain_Nucleus_accumbens_basal_ganglia||chr19_3855479_T_C||chr19:3834983:3868965:clu_18931:ENSG00000105278.10||CA-23217-3065-16470-16628-37046[INC][1/5][UPT]	CA-23217-3065-16470-16628-37046[INC][1/5][UPT]	chr19	3855479	3855402	3855559	23217	ZFR2	exon	77	0	0.525879	0.0530572	0.0530572
chr14_100375363_A_T	Brain_Cerebellar_Hemisphere||chr14_100375363_A_T||chr14:100369258:100376260:clu_19048:ENSG00000140105.17	Brain_Cerebellar_Hemisphere||chr14_100375363_A_T||chr14:100369258:100376260:clu_19048:ENSG00000140105.17||CA-7453-3084-3993-4061-10085[INC][6/371][UPT]	CA-7453-3084-3993-4061-10085[INC][6/371][UPT]	chr14	100375363	100375283	100375350	7453	WARS	intron	13	0	0.112456	-0.0527665	0.0527665
chr14_100375363_A_T	Brain_Cerebellum||chr14_100375363_A_T||chr14:100369258:100376260:clu_19943:ENSG00000140105.17	Brain_Cerebellum||chr14_100375363_A_T||chr14:100369258:100376260:clu_19943:ENSG00000140105.17||CA-7453-3084-3993-4061-10085[INC][6/371][UPT]	CA-7453-3084-3993-4061-10085[INC][6/371][UPT]	chr14	100375363	100375283	100375350	7453	WARS	intron	13	0	0.112456	-0.0527665	0.0527665
chr5_132227207_C_T	Brain_Amygdala||chr5_132227207_C_T||chr5:132218644:132227790:clu_25382:ENSG00000072682.18	Brain_Amygdala||chr5_132227207_C_T||chr5:132218644:132227790:clu_25382:ENSG00000072682.18||CA-8974-3074-3642-3778-12219[INC][58/109][UPT]	CA-8974-3074-3642-3778-12219[INC][58/109][UPT]	chr5	132227207	132227086	132227221	8974	P4HA2	exon	14	0	0.408522	-0.0527455	0.0527455
chr5_132227207_C_T	Brain_Caudate_basal_ganglia||chr5_132227207_C_T||chr5:132218644:132227790:clu_30942:ENSG00000072682.18	Brain_Caudate_basal_ganglia||chr5_132227207_C_T||chr5:132218644:132227790:clu_30942:ENSG00000072682.18||CA-8974-3074-3642-3778-12219[INC][58/109][UPT]	CA-8974-3074-3642-3778-12219[INC][58/109][UPT]	chr5	132227207	132227086	132227221	8974	P4HA2	exon	14	0	0.408522	-0.0527455	0.0527455
chr5_132227207_C_T	Brain_Cerebellar_Hemisphere||chr5_132227207_C_T||chr5:132218644:132227790:clu_32502:ENSG00000072682.18	Brain_Cerebellar_Hemisphere||chr5_132227207_C_T||chr5:132218644:132227790:clu_32502:ENSG00000072682.18||CA-8974-3074-3642-3778-12219[INC][58/109][UPT]	CA-8974-3074-3642-3778-12219[INC][58/109][UPT]	chr5	132227207	132227086	132227221	8974	P4HA2	exon	14	0	0.408522	-0.0527455	0.0527455
chr5_132227207_C_T	Brain_Cerebellum||chr5_132227207_C_T||chr5:132218644:132227790:clu_34085:ENSG00000072682.18	Brain_Cerebellum||chr5_132227207_C_T||chr5:132218644:132227790:clu_34085:ENSG00000072682.18||CA-8974-3074-3642-3778-12219[INC][58/109][UPT]	CA-8974-3074-3642-3778-12219[INC][58/109][UPT]	chr5	132227207	132227086	132227221	8974	P4HA2	exon	14	0	0.408522	-0.0527455	0.0527455
chr5_132227207_C_T	Brain_Cortex||chr5_132227207_C_T||chr5:132218644:132227790:clu_31850:ENSG00000072682.18	Brain_Cortex||chr5_132227207_C_T||chr5:132218644:132227790:clu_31850:ENSG00000072682.18||CA-8974-3074-3642-3778-12219[INC][58/109][UPT]	CA-8974-3074-3642-3778-12219[INC][58/109][UPT]	chr5	132227207	132227086	132227221	8974	P4HA2	exon	14	0	0.408522	-0.0527455	0.0527455
chr5_132227207_C_T	Brain_Hippocampus||chr5_132227207_C_T||chr5:132218644:132227790:clu_28181:ENSG00000072682.18	Brain_Hippocampus||chr5_132227207_C_T||chr5:132218644:132227790:clu_28181:ENSG00000072682.18||CA-8974-3074-3642-3778-12219[INC][58/109][UPT]	CA-8974-3074-3642-3778-12219[INC][58/109][UPT]	chr5	132227207	132227086	132227221	8974	P4HA2	exon	14	0	0.408522	-0.0527455	0.0527455
chr13_49506711_A_G	Brain_Cortex||chr13_49506711_A_G||chr13:49496095:49513059:clu_1932:ENSG00000136147.17	Brain_Cortex||chr13_49506711_A_G||chr13:49496095:49513059:clu_1932:ENSG00000136147.17||CA-51131-54803-65342-65464-71766[INC][42/11][UPT]	CA-51131-54803-65342-65464-71766[INC][42/11][UPT]	chr13	49506711	49506635	49506756	51131	PHF11	exon	45	0	0.671095	0.0527208	0.0527208
chr13_49506711_A_G	Brain_Hypothalamus||chr13_49506711_A_G||chr13:49496095:49513059:clu_1916:ENSG00000136147.17	Brain_Hypothalamus||chr13_49506711_A_G||chr13:49496095:49513059:clu_1916:ENSG00000136147.17||CA-51131-54803-65342-65464-71766[INC][42/11][UPT]	CA-51131-54803-65342-65464-71766[INC][42/11][UPT]	chr13	49506711	49506635	49506756	51131	PHF11	exon	45	0	0.671095	0.0527208	0.0527208
chr13_49506711_A_G	Brain_Nucleus_accumbens_basal_ganglia||chr13_49506711_A_G||chr13:49496095:49513059:clu_2005:ENSG00000136147.17	Brain_Nucleus_accumbens_basal_ganglia||chr13_49506711_A_G||chr13:49496095:49513059:clu_2005:ENSG00000136147.17||CA-51131-54803-65342-65464-71766[INC][42/11][UPT]	CA-51131-54803-65342-65464-71766[INC][42/11][UPT]	chr13	49506711	49506635	49506756	51131	PHF11	exon	45	0	0.671095	0.0527208	0.0527208
chr13_49506711_A_G	Brain_Putamen_basal_ganglia||chr13_49506711_A_G||chr13:49496095:49513059:clu_1665:ENSG00000136147.17	Brain_Putamen_basal_ganglia||chr13_49506711_A_G||chr13:49496095:49513059:clu_1665:ENSG00000136147.17||CA-51131-54803-65342-65464-71766[INC][42/11][UPT]	CA-51131-54803-65342-65464-71766[INC][42/11][UPT]	chr13	49506711	49506635	49506756	107303344		exon	45	0	0.671095	0.0527208	0.0527208
chr16_53479143_T_C	Brain_Cerebellar_Hemisphere||chr16_53479143_T_C||chr16:53470922:53479886:clu_14840:ENSG00000103479.15	Brain_Cerebellar_Hemisphere||chr16_53479143_T_C||chr16:53470922:53479886:clu_14840:ENSG00000103479.15||CA-5934-39503-47734-47806-48466[INC][68/2]	CA-5934-39503-47734-47806-48466[INC][68/2]	chr16	53479143	53479154	53479225	5934	RBL2	intron	11	0	0.96809	-0.0522557	0.0522557
chr16_53479143_T_C	Brain_Cerebellum||chr16_53479143_T_C||chr16:53470922:53479886:clu_15502:ENSG00000103479.15	Brain_Cerebellum||chr16_53479143_T_C||chr16:53470922:53479886:clu_15502:ENSG00000103479.15||CA-5934-39503-47734-47806-48466[INC][68/2]	CA-5934-39503-47734-47806-48466[INC][68/2]	chr16	53479143	53479154	53479225	5934	RBL2	intron	11	0	0.96809	-0.0522557	0.0522557
chr19_54451290_A_G	Brain_Caudate_basal_ganglia||chr19_54451290_A_G||chr19:54449306:54452093:clu_21011:ENSG00000167615.16	Brain_Caudate_basal_ganglia||chr19_54451290_A_G||chr19:54449306:54452093:clu_21011:ENSG00000167615.16||CA-114823@0-3145-5128-5221-5931[INC][17/1][UPT]	CA-114823@0-3145-5128-5221-5931[INC][17/1][UPT]	chr19	54451290	54451290	54451382	114823	LENG8	exon	0	0	0.914751	0.0518914	0.0518914
chr19_54451290_A_G	Brain_Cerebellar_Hemisphere||chr19_54451290_A_G||chr19:54449306:54452093:clu_22351:ENSG00000167615.16	Brain_Cerebellar_Hemisphere||chr19_54451290_A_G||chr19:54449306:54452093:clu_22351:ENSG00000167615.16||CA-114823@0-3145-5128-5221-5931[INC][17/1][UPT]	CA-114823@0-3145-5128-5221-5931[INC][17/1][UPT]	chr19	54451290	54451290	54451382	114823	LENG8	exon	0	0	0.914751	0.0518914	0.0518914
chr19_54451290_A_G	Brain_Cerebellum||chr19_54451290_A_G||chr19:54449306:54452093:clu_23394:ENSG00000167615.16	Brain_Cerebellum||chr19_54451290_A_G||chr19:54449306:54452093:clu_23394:ENSG00000167615.16||CA-114823@0-3145-5128-5221-5931[INC][17/1][UPT]	CA-114823@0-3145-5128-5221-5931[INC][17/1][UPT]	chr19	54451290	54451290	54451382	114823	LENG8	exon	0	0	0.914751	0.0518914	0.0518914
chr12_123694870_T_C	Brain_Amygdala||chr12_123694870_T_C||chr12:123692723:123695220:clu_3821:ENSG00000168778.11	Brain_Amygdala||chr12_123694870_T_C||chr12:123692723:123695220:clu_3821:ENSG00000168778.11||CA-79867-24611-26729-26864-27107[INC][13/2]	CA-79867-24611-26729-26864-27107[INC][13/2]	chr12	123694870	123694842	123694976	79867	TCTN2	exon	28	0	0.864945	0.0518789	0.0518789
chr12_123694870_T_C	Brain_Anterior_cingulate_cortex_BA24||chr12_123694870_T_C||chr12:123692723:123695220:clu_4144:ENSG00000168778.11	Brain_Anterior_cingulate_cortex_BA24||chr12_123694870_T_C||chr12:123692723:123695220:clu_4144:ENSG00000168778.11||CA-79867-24611-26729-26864-27107[INC][13/2]	CA-79867-24611-26729-26864-27107[INC][13/2]	chr12	123694870	123694842	123694976	79867	TCTN2	exon	28	0	0.864945	0.0518789	0.0518789
chr12_123694870_T_C	Brain_Caudate_basal_ganglia||chr12_123694870_T_C||chr12:123692723:123695220:clu_4716:ENSG00000168778.11	Brain_Caudate_basal_ganglia||chr12_123694870_T_C||chr12:123692723:123695220:clu_4716:ENSG00000168778.11||CA-79867-24611-26729-26864-27107[INC][13/2]	CA-79867-24611-26729-26864-27107[INC][13/2]	chr12	123694870	123694842	123694976	79867	TCTN2	exon	28	0	0.864945	0.0518789	0.0518789
chr12_123694870_T_C	Brain_Cortex||chr12_123694870_T_C||chr12:123692723:123695220:clu_4848:ENSG00000168778.11	Brain_Cortex||chr12_123694870_T_C||chr12:123692723:123695220:clu_4848:ENSG00000168778.11||CA-79867-24611-26729-26864-27107[INC][13/2]	CA-79867-24611-26729-26864-27107[INC][13/2]	chr12	123694870	123694842	123694976	79867	TCTN2	exon	28	0	0.864945	0.0518789	0.0518789
chr12_123694870_T_C	Brain_Frontal_Cortex_BA9||chr12_123694870_T_C||chr12:123692723:123695220:clu_4515:ENSG00000168778.11	Brain_Frontal_Cortex_BA9||chr12_123694870_T_C||chr12:123692723:123695220:clu_4515:ENSG00000168778.11||CA-79867-24611-26729-26864-27107[INC][13/2]	CA-79867-24611-26729-26864-27107[INC][13/2]	chr12	123694870	123694842	123694976	79867	TCTN2	exon	28	0	0.864945	0.0518789	0.0518789
chr12_123694870_T_C	Brain_Hypothalamus||chr12_123694870_T_C||chr12:123692723:123695220:clu_4629:ENSG00000168778.11	Brain_Hypothalamus||chr12_123694870_T_C||chr12:123692723:123695220:clu_4629:ENSG00000168778.11||CA-79867-24611-26729-26864-27107[INC][13/2]	CA-79867-24611-26729-26864-27107[INC][13/2]	chr12	123694870	123694842	123694976	79867	TCTN2	exon	28	0	0.864945	0.0518789	0.0518789
chr12_123694870_T_C	Brain_Putamen_basal_ganglia||chr12_123694870_T_C||chr12:123692723:123695220:clu_4154:ENSG00000168778.11	Brain_Putamen_basal_ganglia||chr12_123694870_T_C||chr12:123692723:123695220:clu_4154:ENSG00000168778.11||CA-79867-24611-26729-26864-27107[INC][13/2]	CA-79867-24611-26729-26864-27107[INC][13/2]	chr12	123694870	123694842	123694976	79867	TCTN2	exon	28	0	0.864945	0.0518789	0.0518789
chr17_27643607_G_A	Brain_Caudate_basal_ganglia||chr17_27643607_G_A||chr17:27642348:27645861:clu_10591:ENSG00000168961.16	Brain_Caudate_basal_ganglia||chr17_27643607_G_A||chr17:27642348:27645861:clu_10591:ENSG00000168961.16||CA-3965-14201-15377-15473-17713[INC][1/7]	CA-3965-14201-15377-15473-17713[INC][1/7]	chr17	27643607	27643525	27643620	3965	LGALS9	exon	13	0	0.0995168	0.0514279	0.0514279
chr17_27643607_G_A	Brain_Hypothalamus||chr17_27643607_G_A||chr17:27642348:27645861:clu_10344:ENSG00000168961.16	Brain_Hypothalamus||chr17_27643607_G_A||chr17:27642348:27645861:clu_10344:ENSG00000168961.16||CA-3965-14201-15377-15473-17713[INC][1/7]	CA-3965-14201-15377-15473-17713[INC][1/7]	chr17	27643607	27643525	27643620	3965	LGALS9	exon	13	0	0.0995168	0.0514279	0.0514279
chr17_27643607_G_A	Brain_Spinal_cord_cervical_c-1||chr17_27643607_G_A||chr17:27642348:27645314:clu_9218:ENSG00000168961.16	Brain_Spinal_cord_cervical_c-1||chr17_27643607_G_A||chr17:27642348:27645314:clu_9218:ENSG00000168961.16||CA-3965-14201-15377-15473-17166[INC][29/79]	CA-3965-14201-15377-15473-17166[INC][29/79]	chr17	27643607	27643525	27643620	3965	LGALS9	exon	13	0	0.0995168	0.0514279	0.0514279
chr1_225856690_G_A	Brain_Hippocampus||chr1_225856690_G_A||chr1:225855940:225856911:clu_40213:ENSG00000196187.11	Brain_Hippocampus||chr1_225856690_G_A||chr1:225855940:225856911:clu_40213:ENSG00000196187.11||CA-9725-28810-28982-29069-29780[INC][24/1]	CA-9725-28810-28982-29069-29780[INC][24/1]	chr1	225856690	225856652	225856738	9725	TMEM63A	exon	38	0	0.962677	-0.0512476	0.0512476
chr1_225856690_G_A	Brain_Spinal_cord_cervical_c-1||chr1_225856690_G_A||chr1:225855940:225856911:clu_38471:ENSG00000196187.11	Brain_Spinal_cord_cervical_c-1||chr1_225856690_G_A||chr1:225855940:225856911:clu_38471:ENSG00000196187.11||CA-9725-28810-28982-29069-29780[INC][24/1]	CA-9725-28810-28982-29069-29780[INC][24/1]	chr1	225856690	225856652	225856738	9725	TMEM63A	exon	38	0	0.962677	-0.0512476	0.0512476
chr14_50293312_C_T	Brain_Cerebellar_Hemisphere||chr14_50293312_C_T||chr14:50284033:50294115:clu_18145:ENSG00000087299.11	Brain_Cerebellar_Hemisphere||chr14_50293312_C_T||chr14:50284033:50294115:clu_18145:ENSG00000087299.11||CA-79944-21115-21946-22025-31196[INC][2/24]	CA-79944-21115-21946-22025-31196[INC][2/24]	chr14	50293312	50293205	50293283	79944	L2HGDH	intron	29	0	0.0544694	0.0511679	0.0511679
chr14_50293312_C_T	Brain_Cerebellum||chr14_50293312_C_T||chr14:50284033:50294115:clu_19003:ENSG00000087299.11	Brain_Cerebellum||chr14_50293312_C_T||chr14:50284033:50294115:clu_19003:ENSG00000087299.11||CA-79944-21115-21946-22025-31196[INC][2/24]	CA-79944-21115-21946-22025-31196[INC][2/24]	chr14	50293312	50293205	50293283	79944	L2HGDH	intron	29	0	0.0544694	0.0511679	0.0511679
chr1_248855548_T_C	Brain_Cerebellar_Hemisphere||chr1_248855548_T_C||chr1:248855458:248855725:clu_46571:ENSG00000171163.15	Brain_Cerebellar_Hemisphere||chr1_248855548_T_C||chr1:248855458:248855725:clu_46571:ENSG00000171163.15||CA-55657-6392-6481-6559-6658[INC][36/6]	CA-55657-6392-6481-6559-6658[INC][36/6]	chr1	248855548	248855558	248855635	55657	ZNF692	intron	10	0	0.795693	0.0507651	0.0507651
chr1_248855548_T_C	Brain_Cerebellum||chr1_248855548_T_C||chr1:248855458:248855725:clu_48972:ENSG00000171163.15	Brain_Cerebellum||chr1_248855548_T_C||chr1:248855458:248855725:clu_48972:ENSG00000171163.15||CA-55657-6392-6481-6559-6658[INC][36/6]	CA-55657-6392-6481-6559-6658[INC][36/6]	chr1	248855548	248855558	248855635	55657	ZNF692	intron	10	0	0.795693	0.0507651	0.0507651
chr6_158170446_A_G	Brain_Anterior_cingulate_cortex_BA24||chr6_158170446_A_G||chr6:158168395:158191977:clu_26190:ENSG00000272047.1	Brain_Anterior_cingulate_cortex_BA24||chr6_158170446_A_G||chr6:158168395:158191977:clu_26190:ENSG00000272047.1||CA-404672-3049-5123-5192-26630[INC][37/1][UPT][DNT]	CA-404672-3049-5123-5192-26630[INC][37/1][UPT][DNT]	chr6	158170446	158170470	158170538	404672	GTF2H5	intron	24	0	0.975056	-0.0506485	0.0506485
chr6_158170446_A_G	Brain_Caudate_basal_ganglia||chr6_158170446_A_G||chr6:158168395:158191977:clu_29610:ENSG00000272047.1	Brain_Caudate_basal_ganglia||chr6_158170446_A_G||chr6:158168395:158191977:clu_29610:ENSG00000272047.1||CA-404672-3049-5123-5192-26630[INC][37/1][UPT][DNT]	CA-404672-3049-5123-5192-26630[INC][37/1][UPT][DNT]	chr6	158170446	158170470	158170538	404672	GTF2H5	intron	24	0	0.975056	-0.0506485	0.0506485
chr6_158170446_A_G	Brain_Cerebellar_Hemisphere||chr6_158170446_A_G||chr6:158168395:158191977:clu_31237:ENSG00000272047.1	Brain_Cerebellar_Hemisphere||chr6_158170446_A_G||chr6:158168395:158191977:clu_31237:ENSG00000272047.1||CA-404672-3049-5123-5192-26630[INC][37/1][UPT][DNT]	CA-404672-3049-5123-5192-26630[INC][37/1][UPT][DNT]	chr6	158170446	158170470	158170538	404672	GTF2H5	intron	24	0	0.975056	-0.0506485	0.0506485
chr6_158170446_A_G	Brain_Nucleus_accumbens_basal_ganglia||chr6_158170446_A_G||chr6:158168395:158191977:clu_30258:ENSG00000272047.1	Brain_Nucleus_accumbens_basal_ganglia||chr6_158170446_A_G||chr6:158168395:158191977:clu_30258:ENSG00000272047.1||CA-404672-3049-5123-5192-26630[INC][37/1][UPT][DNT]	CA-404672-3049-5123-5192-26630[INC][37/1][UPT][DNT]	chr6	158170446	158170470	158170538	404672	GTF2H5	intron	24	0	0.975056	-0.0506485	0.0506485
chr6_158170446_A_G	Brain_Spinal_cord_cervical_c-1||chr6_158170446_A_G||chr6:158168395:158191977:clu_25909:ENSG00000272047.1	Brain_Spinal_cord_cervical_c-1||chr6_158170446_A_G||chr6:158168395:158191977:clu_25909:ENSG00000272047.1||CA-404672-3049-5123-5192-26630[INC][37/1][UPT][DNT]	CA-404672-3049-5123-5192-26630[INC][37/1][UPT][DNT]	chr6	158170446	158170470	158170538	404672	GTF2H5	intron	24	0	0.975056	-0.0506485	0.0506485
chr12_20699612_C_T	Brain_Anterior_cingulate_cortex_BA24||chr12_20699612_C_T||chr12:20695807:20705949:clu_2457:ENSG00000139155.8	Brain_Anterior_cingulate_cortex_BA24||chr12_20699612_C_T||chr12:20695807:20705949:clu_2457:ENSG00000139155.8||CA-53919-3453-7197-7351-13594[INC][1/6]	CA-53919-3453-7197-7351-13594[INC][1/6]	chr12	20699612	20699552	20699705	53919	SLCO1C1	exon	60	0	0.800288	-0.0501774	0.0501774
chr12_20699612_C_T	Brain_Caudate_basal_ganglia||chr12_20699612_C_T||chr12:20695807:20705949:clu_2822:ENSG00000139155.8	Brain_Caudate_basal_ganglia||chr12_20699612_C_T||chr12:20695807:20705949:clu_2822:ENSG00000139155.8||CA-53919-3453-7197-7351-13594[INC][1/6]	CA-53919-3453-7197-7351-13594[INC][1/6]	chr12	20699612	20699552	20699705	53919	SLCO1C1	exon	60	0	0.800288	-0.0501774	0.0501774
chr12_20699612_C_T	Brain_Cortex||chr12_20699612_C_T||chr12:20695807:20705949:clu_2859:ENSG00000139155.8	Brain_Cortex||chr12_20699612_C_T||chr12:20695807:20705949:clu_2859:ENSG00000139155.8||CA-53919-3453-7197-7351-13594[INC][1/6]	CA-53919-3453-7197-7351-13594[INC][1/6]	chr12	20699612	20699552	20699705	53919	SLCO1C1	exon	60	0	0.800288	-0.0501774	0.0501774
chr12_20699612_C_T	Brain_Frontal_Cortex_BA9||chr12_20699612_C_T||chr12:20695807:20705949:clu_2673:ENSG00000139155.8	Brain_Frontal_Cortex_BA9||chr12_20699612_C_T||chr12:20695807:20705949:clu_2673:ENSG00000139155.8||CA-53919-3453-7197-7351-13594[INC][1/6]	CA-53919-3453-7197-7351-13594[INC][1/6]	chr12	20699612	20699552	20699705	53919	SLCO1C1	exon	60	0	0.800288	-0.0501774	0.0501774
chr12_20699612_C_T	Brain_Nucleus_accumbens_basal_ganglia||chr12_20699612_C_T||chr12:20695807:20705949:clu_2900:ENSG00000139155.8	Brain_Nucleus_accumbens_basal_ganglia||chr12_20699612_C_T||chr12:20695807:20705949:clu_2900:ENSG00000139155.8||CA-53919-3453-7197-7351-13594[INC][1/6]	CA-53919-3453-7197-7351-13594[INC][1/6]	chr12	20699612	20699552	20699705	53919	SLCO1C1	exon	60	0	0.800288	-0.0501774	0.0501774
chr12_20699612_C_T	Brain_Putamen_basal_ganglia||chr12_20699612_C_T||chr12:20695807:20705949:clu_2481:ENSG00000139155.8	Brain_Putamen_basal_ganglia||chr12_20699612_C_T||chr12:20695807:20705949:clu_2481:ENSG00000139155.8||CA-53919-3453-7197-7351-13594[INC][1/6]	CA-53919-3453-7197-7351-13594[INC][1/6]	chr12	20699612	20699552	20699705	53919	SLCO1C1	exon	60	0	0.800288	-0.0501774	0.0501774
chr2_208171988_T_C	Brain_Hippocampus||chr2_208171988_T_C||chr2:208165815:208180745:clu_35583:ENSG00000188674.10	Brain_Hippocampus||chr2_208171988_T_C||chr2:208165815:208180745:clu_35583:ENSG00000188674.10||CA-389073-12305-20974-21062-27234[INC][2/2]	CA-389073-12305-20974-21062-27234[INC][2/2]	chr2	208171988	208171988	208172075	389073	C2orf80	exon	0	0	0.948878	0.0501127	0.0501127
