# Supplementary material for: Reference-informed prediction of alternative splicing and splicing-altering mutations from sequences
Source: HighWire-hosted journal article supplement (doi:10.1101/gr.279044.124), 2024-07-01
Supplement: Supplemental_Table_S5.xlsx [file Supplemental_Table_S5.xlsx]

## Sheet: var
Table S5: Summary of de novo mutations in neurodevelopmental disorder patients and controls identified by whole genome sequencing (WGS). Only genic single nucleotide variants (SNVs) are included.
										cz lab gene annotation																										study/sample information
#	eventID	SequenceType	group	Primary Phenotype	varID	Chr	POS	Ref	Alt	gene_id	gene_symbol	strand	region	rmsk_type	rmsk_fraction	Func.refGene	Gene.refGene	GeneDetail.refGene	ExonicFunc.refGene	AAChange.refGene	SIFT_pred	Polyphen2_HDIV_pred	Polyphen2_HVAR_pred	LRT_pred	MutationTaster_pred	MutationAssessor_pred	FATHMM_pred	PROVEAN_pred	MetaSVM_pred	MetaLR_pred	M-CAP_pred	fathmm-MKL_coding_pred	CADD_phred	phyloP20way_mammalian	phastCons20way_mammalian	StudyName	SampleID	FAMILYID	FAMILYTYPE	FATHERID	MOTHERID	gender	NVIQ	FatherAgeBirth	MotherAgeBirth
1	13916.p1||10_100007693_T_C	genome	NDD	autism	10_100007693_T_C	10	100007693	T	C	84171	LOXL4	-	3'UTR			UTR3	LOXL4	NM_032211:c.*985A>G	.	.	.	.	.	.	.	.	.	.	.	.	.	.	.	.	.	SSC	13916.p1	13916	simplex	13916.f1	13916.m1	male	156	390	330
2	1-0043-003||10_100019400_C_T	genome	NDD	autism	10_100019400_C_T	10	100019400	C	T	84171	LOXL4	-	intron			intronic	LOXL4	.	.	.	.	.	.	.	.	.	.	.	.	.	.	.	.	.	.	Yuen2017	1-0043-003	FAM_1-0043-004	MPX	1-0043-002	1-0043-001	M		NA	NA
3	2-1185-003||10_100026933_C_T	genome	NDD	autism	10_100026933_C_T	10	100026933	C	T	84171	LOXL4	-	intron	SINE	1	intronic	LOXL4	.	.	.	.	.	.	.	.	.	.	.	.	.	.	.	.	.	.	Yuen2017	2-1185-003	FAM_2-1185-003	SPX	2-1185-002	2-1185-001	M		NA	NA
4	14670.s1||10_100157931_C_T	genome	control	control	10_100157931_C_T	10	100157931	C	T	84795	PYROXD2	-	intron	SINE	1	intronic	PYROXD2	.	.	.	.	.	.	.	.	.	.	.	.	.	.	.	.	.	.	Turner_2017;SSC	14670.s1	;14670	;simplex	;14670.f1	;14670.m1	;female	;.	NA;464	NA;394
5	5-0087-003||10_100163076_G_A	genome	NDD	autism	10_100163076_G_A	10	100163076	G	A	84795	PYROXD2	-	intron			intronic	PYROXD2	.	.	.	.	.	.	.	.	.	.	.	.	.	.	.	.	.	.	Yuen2017	5-0087-003	FAM_5-0087-003	SPX	5-0087-002	5-0087-001	M		NA	NA
6	14658.s1||10_100166825_T_G	genome	control	control	10_100166825_T_G	10	100166825	T	G	84795	PYROXD2	-	intron			intronic	PYROXD2	.	.	.	.	.	.	.	.	.	.	.	.	.	.	.	.	.	.	Turner_2017	14658.s1							NA	NA
7	AU049304||10_100167042_C_T	genome	NDD	autism	10_100167042_C_T	10	100167042	C	T	84795	PYROXD2	-	intron			intronic	PYROXD2	.	.	.	.	.	.	.	.	.	.	.	.	.	.	.	.	.	.	Yuen2017	AU049304	FAM_AU049304	MPX	AU049302	AU049301	M		NA	NA
8	3-0018-000||10_100177702_G_A	genome	NDD	autism	10_100177702_G_A	10	100177702	G	A	3257	HPS1	-	intron			intronic	HPS1	.	.	.	.	.	.	.	.	.	.	.	.	.	.	.	.	.	.	Yuen2017	3-0018-000	FAM_3-0018-101	SPX	3-0018-101	3-0018-100	M		NA	NA
9	14460.p1||10_100179274_C_T	genome	NDD	autism	10_100179274_C_T	10	100179274	C	T	3257	HPS1	-	intron			intronic	HPS1	.	.	.	.	.	.	.	.	.	.	.	.	.	.	.	.	.	.	Turner_2017	14460.p1							NA	NA
10	12707.s2||10_100220810_G_A	genome	control	control	10_100220810_G_A	10	100220810	G	A	60495	HPSE2	-	intron			intronic	HPSE2	.	.	.	.	.	.	.	.	.	.	.	.	.	.	.	.	.	.	SSC	12707.s2	12707	simplex	12707.f1	12707.m1	female	.	394	381
11	11842.p1||10_100227260_G_T	genome	NDD	autism	10_100227260_G_T	10	100227260	G	T	60495	HPSE2	-	intron	Low_complexity	1	intronic	HPSE2	.	.	.	.	.	.	.	.	.	.	.	.	.	.	.	.	.	.	SSC	11842.p1	11842	simplex	11842.f1	11842.m1	male	38	386	388
12	13412.s1||10_100246849_G_T	genome	control	control	10_100246849_G_T	10	100246849	G	T	60495	HPSE2	-	intron	DNA	1	intronic	HPSE2	.	.	.	.	.	.	.	.	.	.	.	.	.	.	.	.	.	.	SSC	13412.s1	13412	simplex	13412.f1	13412.m1	female	.	435	429
13	13584.p1||10_100258219_G_A	genome	NDD	autism	10_100258219_G_A	10	100258219	G	A	60495	HPSE2	-	intron	LINE	1	intronic	HPSE2	.	.	.	.	.	.	.	.	.	.	.	.	.	.	.	.	.	.	SSC	13584.p1	13584	simplex	13584.f1	13584.m1	male	52	354	453
14	12335.p1||10_100264371_G_A	genome	NDD	autism	10_100264371_G_A	10	100264371	G	A	60495	HPSE2	-	intron	SINE	1	intronic	HPSE2	.	.	.	.	.	.	.	.	.	.	.	.	.	.	.	.	.	.	SSC	12335.p1	12335	simplex	12335.f1	12335.m1	female	47	397	395
15	1-0382-004||10_100269382_C_T	genome	NDD	autism	10_100269382_C_T	10	100269382	C	T	60495	HPSE2	-	intron	SINE	1	intronic	HPSE2	.	.	.	.	.	.	.	.	.	.	.	.	.	.	.	.	.	.	Yuen2017	1-0382-004	FAM_1-0382-004	MPX	1-0382-002	1-0382-001	M		NA	NA
16	gonl-165c||10_100279123_T_C	genome	control	control	10_100279123_T_C	10	100279123	T	C	60495	HPSE2	-	intron			intronic	HPSE2	.	.	.	.	.	.	.	.	.	.	.	.	.	.	.	.	.	.	GONL	gonl-165c							NA	NA
17	AU4103301||10_100283717_C_T	genome	NDD	autism	10_100283717_C_T	10	100283717	C	T	60495	HPSE2	-	intron			intronic	HPSE2	.	.	.	.	.	.	.	.	.	.	.	.	.	.	.	.	.	.	Yuen2017	AU4103301	FAM_AU4103301	MPX	AU4103201	AU4103202	M		NA	NA
18	14418.s1||10_100298407_C_T	genome	control	control	10_100298407_C_T	10	100298407	C	T	60495	HPSE2	-	intron	DNA	1	intronic	HPSE2	.	.	.	.	.	.	.	.	.	.	.	.	.	.	.	.	.	.	SSC	14418.s1	14418	simplex	14418.f1	14418.m1	female	.	395	405
19	13239.p1||10_100300186_G_A	genome	NDD	autism	10_100300186_G_A	10	100300186	G	A	60495	HPSE2	-	intron			intronic	HPSE2	.	.	.	.	.	.	.	.	.	.	.	.	.	.	.	.	.	.	Turner_2017	13239.p1							NA	NA
20	13637.s1||10_100305758_T_C	genome	control	control	10_100305758_T_C	10	100305758	T	C	60495	HPSE2	-	intron	LINE	1	intronic	HPSE2	.	.	.	.	.	.	.	.	.	.	.	.	.	.	.	.	.	.	Turner_2017	13637.s1							NA	NA
21	12829.s1||10_100306140_A_C	genome	control	control	10_100306140_A_C	10	100306140	A	C	60495	HPSE2	-	intron	LINE	1	intronic	HPSE2	.	.	.	.	.	.	.	.	.	.	.	.	.	.	.	.	.	.	Turner_2017	12829.s1							NA	NA
22	13310.s1||10_100317774_C_T	genome	control	control	10_100317774_C_T	10	100317774	C	T	60495	HPSE2	-	intron	LINE	1	intronic	HPSE2	.	.	.	.	.	.	.	.	.	.	.	.	.	.	.	.	.	.	SSC	13310.s1	13310	simplex	13310.f1	13310.m1	male	.	334	320
23	2-1230-003||10_100325695_C_T	genome	NDD	autism	10_100325695_C_T	10	100325695	C	T	60495	HPSE2	-	intron	SINE	1	intronic	HPSE2	.	.	.	.	.	.	.	.	.	.	.	.	.	.	.	.	.	.	Yuen2016	2-1230-003	FAM_2-1230-003	SPX	2-1230-002	2-1230-001	F		NA	NA
24	11074.s1||10_100328490_G_C	genome	control	control	10_100328490_G_C	10	100328490	G	C	60495	HPSE2	-	intron			intronic	HPSE2	.	.	.	.	.	.	.	.	.	.	.	.	.	.	.	.	.	.	SSC	11074.s1	11074	simplex	11074.f1	11074.m1	male	.	419	381
25	14005.s1||10_100334441_T_C	genome	control	control	10_100334441_T_C	10	100334441	T	C	60495	HPSE2	-	intron			intronic	HPSE2	.	.	.	.	.	.	.	.	.	.	.	.	.	.	.	.	.	.	Turner_2017	14005.s1							NA	NA
26	14157.p1||10_100338808_A_T	genome	NDD	autism	10_100338808_A_T	10	100338808	A	T	60495	HPSE2	-	intron	LTR	1	intronic	HPSE2	.	.	.	.	.	.	.	.	.	.	.	.	.	.	.	.	.	.	SSC	14157.p1	14157	simplex	14157.f1	14157.m1	male	93	546	515
27	14536.s1||10_100344875_G_A	genome	control	control	10_100344875_G_A	10	100344875	G	A	60495	HPSE2	-	intron			intronic	HPSE2	.	.	.	.	.	.	.	.	.	.	.	.	.	.	.	.	.	.	SSC	14536.s1	14536	simplex	14536.f1	14536.m1	female	.	300	286
28	2-1317-003||10_100346498_C_A	genome	NDD	autism	10_100346498_C_A	10	100346498	C	A	60495	HPSE2	-	intron	DNA	1	intronic	HPSE2	.	.	.	.	.	.	.	.	.	.	.	.	.	.	.	.	.	.	Yuen2017	2-1317-003	FAM_2-1317-003	SPX	2-1317-002	2-1317-001	M		NA	NA
29	14521.s1||10_100382851_T_C	genome	control	control	10_100382851_T_C	10	100382851	T	C	60495	HPSE2	-	intron	LINE	1	intronic	HPSE2	.	.	.	.	.	.	.	.	.	.	.	.	.	.	.	.	.	.	Turner_2017;SSC	14521.s1	;14521	;simplex	;14521.f1	;14521.m1	;male	;.	NA;292	NA;280
30	2-1444-003||10_100409910_A_C	genome	NDD	autism	10_100409910_A_C	10	100409910	A	C	60495	HPSE2	-	intron			intronic	HPSE2	.	.	.	.	.	.	.	.	.	.	.	.	.	.	.	.	.	.	Yuen2016	2-1444-003	FAM_2-1444-003	SPX	2-1444-002	2-1444-001	M		NA	NA
31	11069.p1||10_100417755_C_T	genome	NDD	autism	10_100417755_C_T	10	100417755	C	T	60495	HPSE2	-	intron			intronic	HPSE2	.	.	.	.	.	.	.	.	.	.	.	.	.	.	.	.	.	.	SSC	11069.p1	11069	simplex	11069.f1	11069.m1	male	96	493	402
32	14130.s1||10_100431656_A_G	genome	control	control	10_100431656_A_G	10	100431656	A	G	60495	HPSE2	-	intron			intronic	HPSE2	.	.	.	.	.	.	.	.	.	.	.	.	.	.	.	.	.	.	SSC	14130.s1	14130	simplex	14130.f1	14130.m1	female	.	392	276
33	14418.s1||10_100432992_G_A	genome	control	control	10_100432992_G_A	10	100432992	G	A	60495	HPSE2	-	intron			intronic	HPSE2	.	.	.	.	.	.	.	.	.	.	.	.	.	.	.	.	.	.	SSC	14418.s1	14418	simplex	14418.f1	14418.m1	female	.	395	405
34	14320.s1||10_100448325_C_A	genome	control	control	10_100448325_C_A	10	100448325	C	A	60495	HPSE2	-	intron	SINE	1	intronic	HPSE2	.	.	.	.	.	.	.	.	.	.	.	.	.	.	.	.	.	.	SSC	14320.s1	14320	simplex	14320.f1	14320.m1	male	.	457	401
35	11063.p1||10_100451615_A_C	genome	NDD	autism	10_100451615_A_C	10	100451615	A	C	60495	HPSE2	-	intron	SINE	1	intronic	HPSE2	.	.	.	.	.	.	.	.	.	.	.	.	.	.	.	.	.	.	SSC	11063.p1	11063	simplex	11063.f1	11063.m1	male	101	378	366
36	13513.p1||10_100455365_A_G	genome	NDD	autism	10_100455365_A_G	10	100455365	A	G	60495	HPSE2	-	intron			intronic	HPSE2	.	.	.	.	.	.	.	.	.	.	.	.	.	.	.	.	.	.	SSC	13513.p1	13513	simplex	13513.f1	13513.m1	male	88	395	404
37	11043.p1||10_100461895_C_T	genome	NDD	autism	10_100461895_C_T	10	100461895	C	T	60495	HPSE2	-	intron	LINE	1	intronic	HPSE2	.	.	.	.	.	.	.	.	.	.	.	.	.	.	.	.	.	.	Turner_2017;SSC	11043.p1	;11043	;simplex	;11043.f1	;11043.m1	;female	;103	NA;401	NA;283
38	13573.p1||10_100468040_T_C	genome	NDD	autism	10_100468040_T_C	10	100468040	T	C	60495	HPSE2	-	intron	SINE	1	intronic	HPSE2	.	.	.	.	.	.	.	.	.	.	.	.	.	.	.	.	.	.	SSC	13573.p1	13573	simplex	13573.f1	13573.m1	male	106	418	378
39	11030.s1||10_100474890_G_C	genome	control	control	10_100474890_G_C	10	100474890	G	C	60495	HPSE2	-	intron	LINE	1	intronic	HPSE2	.	.	.	.	.	.	.	.	.	.	.	.	.	.	.	.	.	.	Turner_2017;SSC	11030.s1	;11030	;simplex	;11030.f1	;11030.m1	;female	;.	NA;372	NA;354
40	11013.s1||10_100487700_C_T	genome	control	control	10_100487700_C_T	10	100487700	C	T	60495	HPSE2	-	intron	LINE	1	intronic	HPSE2	.	.	.	.	.	.	.	.	.	.	.	.	.	.	.	.	.	.	SSC	11013.s1	11013	simplex	11013.f1	11013.m1	male	.	351	352
41	13875.p1||10_100494471_C_A	genome	NDD	autism	10_100494471_C_A	10	100494471	C	A	60495	HPSE2	-	intron			intronic	HPSE2	.	.	.	.	.	.	.	.	.	.	.	.	.	.	.	.	.	.	SSC	13875.p1	13875	simplex	13875.f1	13875.m1	male	82	450	410
42	14165.p1||10_100515932_G_C	genome	NDD	autism	10_100515932_G_C	10	100515932	G	C	60495	HPSE2	-	intron	LINE	1	intronic	HPSE2	.	.	.	.	.	.	.	.	.	.	.	.	.	.	.	.	.	.	SSC	14165.p1	14165	simplex	14165.f1	14165.m1	male	85	268	237
43	AU3517302||10_100518688_A_G	genome	NDD	autism	10_100518688_A_G	10	100518688	A	G	60495	HPSE2	-	intron	LINE	1	intronic	HPSE2	.	.	.	.	.	.	.	.	.	.	.	.	.	.	.	.	.	.	Yuen2017	AU3517302	FAM_AU3517302	MPX	AU3517201	AU3517202	F		NA	NA
44	13956.p1||10_100529963_A_G	genome	NDD	autism	10_100529963_A_G	10	100529963	A	G	60495	HPSE2	-	intron	DNA	1	intronic	HPSE2	.	.	.	.	.	.	.	.	.	.	.	.	.	.	.	.	.	.	SSC	13956.p1	13956	simplex	13956.f1	13956.m1	male	111	398	386
45	13938.s1||10_100532151_C_A	genome	control	control	10_100532151_C_A	10	100532151	C	A	60495	HPSE2	-	intron	LTR	1	intronic	HPSE2	.	.	.	.	.	.	.	.	.	.	.	.	.	.	.	.	.	.	SSC	13938.s1	13938	simplex	13938.f1	13938.m1	female	.	324	310
46	14167.s1||10_100535990_G_T	genome	control	control	10_100535990_G_T	10	100535990	G	T	60495	HPSE2	-	intron	SINE	1	intronic	HPSE2	.	.	.	.	.	.	.	.	.	.	.	.	.	.	.	.	.	.	Turner_2017	14167.s1							NA	NA
47	12394.s1||10_100554584_T_C	genome	control	control	10_100554584_T_C	10	100554584	T	C	60495	HPSE2	-	intron			intronic	HPSE2	.	.	.	.	.	.	.	.	.	.	.	.	.	.	.	.	.	.	SSC	12394.s1	12394	simplex	12394.f1	12394.m1	male	.	354	365
48	2-1402-003||10_100554603_C_T	genome	NDD	autism	10_100554603_C_T	10	100554603	C	T	60495	HPSE2	-	intron			intronic	HPSE2	.	.	.	.	.	.	.	.	.	.	.	.	.	.	.	.	.	.	Yuen2017	2-1402-003	FAM_2-1402-003	SPX	2-1402-002	2-1402-001	F		NA	NA
49	13706.p1||10_100555112_G_C	genome	NDD	autism	10_100555112_G_C	10	100555112	G	C	60495	HPSE2	-	intron	LINE	1	intronic	HPSE2	.	.	.	.	.	.	.	.	.	.	.	.	.	.	.	.	.	.	Turner_2017;SSC	13706.p1	;13706	;simplex	;13706.f1	;13706.m1	;male	;70	NA;317	NA;280
50	12438.s1||10_100560675_T_C	genome	control	control	10_100560675_T_C	10	100560675	T	C	60495	HPSE2	-	intron	LINE	1	intronic	HPSE2	.	.	.	.	.	.	.	.	.	.	.	.	.	.	.	.	.	.	SSC	12438.s1	12438	simplex	12438.f1	12438.m1	male	.	358	402
51	14410.p1||10_100563115_T_G	genome	NDD	autism	10_100563115_T_G	10	100563115	T	G	60495	HPSE2	-	intron	LINE	1	intronic	HPSE2	.	.	.	.	.	.	.	.	.	.	.	.	.	.	.	.	.	.	Turner_2017	14410.p1							NA	NA
52	1-0546-003||10_100564156_A_G	genome	NDD	autism	10_100564156_A_G	10	100564156	A	G	60495	HPSE2	-	intron	LINE	1	intronic	HPSE2	.	.	.	.	.	.	.	.	.	.	.	.	.	.	.	.	.	.	Yuen2017	1-0546-003	FAM_1-0546-004	SPX	1-0546-002	1-0546-001	M		NA	NA
53	13456.p1||10_100582485_T_C	genome	NDD	autism	10_100582485_T_C	10	100582485	T	C	60495	HPSE2	-	intron	LINE	1	intronic	HPSE2	.	.	.	.	.	.	.	.	.	.	.	.	.	.	.	.	.	.	SSC	13456.p1	13456	simplex	13456.f1	13456.m1	male	23	404	435
54	AU024004||10_100593479_C_A	genome	NDD	autism	10_100593479_C_A	10	100593479	C	A	60495	HPSE2	-	intron	LTR	1	intronic	HPSE2	.	.	.	.	.	.	.	.	.	.	.	.	.	.	.	.	.	.	Yuen2017	AU024004	FAM_AU024004	MPX	AU024002	AU024001	M		NA	NA
55	12937.p1||10_100595204_A_T	genome	NDD	autism	10_100595204_A_T	10	100595204	A	T	60495	HPSE2	-	intron	LINE	1	intronic	HPSE2	.	.	.	.	.	.	.	.	.	.	.	.	.	.	.	.	.	.	Turner_2017;SSC	12937.p1	;12937	;simplex	;12937.f1	;12937.m1	;male	;40	NA;395	NA;394
56	12469.s1||10_100625446_C_T	genome	control	control	10_100625446_C_T	10	100625446	C	T	60495	HPSE2	-	intron	LINE	1	intronic	HPSE2	.	.	.	.	.	.	.	.	.	.	.	.	.	.	.	.	.	.	SSC	12469.s1	12469	simplex	12469.f1	12469.m1	female	.	386	378
57	14103.p1||10_100634005_T_C	genome	NDD	autism	10_100634005_T_C	10	100634005	T	C	60495	HPSE2	-	intron	LINE	1	intronic	HPSE2	.	.	.	.	.	.	.	.	.	.	.	.	.	.	.	.	.	.	SSC	14103.p1	14103	simplex	14103.f1	14103.m1	male	17	295	304
58	2-1335-004||10_100637946_C_T	genome	NDD	autism	10_100637946_C_T	10	100637946	C	T	60495	HPSE2	-	intron			intronic	HPSE2	.	.	.	.	.	.	.	.	.	.	.	.	.	.	.	.	.	.	Yuen2017	2-1335-004	FAM_2-1335-004	MPX	2-1335-002	2-1335-001	M		NA	NA
59	13858.p1||10_100652293_C_T	genome	NDD	autism	10_100652293_C_T	10	100652293	C	T	60495	HPSE2	-	intron			intronic	HPSE2	.	.	.	.	.	.	.	.	.	.	.	.	.	.	.	.	.	.	Turner_2017;SSC	13858.p1	;13858	;simplex	;13858.f1	;13858.m1	;male	;91	NA;382	NA;359
60	11944.p1||10_100658399_A_G	genome	NDD	autism	10_100658399_A_G	10	100658399	A	G	60495	HPSE2	-	intron	LINE	1	intronic	HPSE2	.	.	.	.	.	.	.	.	.	.	.	.	.	.	.	.	.	.	SSC	11944.p1	11944	simplex	11944.f1	11944.m1	male	103	362	381
61	13499.p1||10_100671015_G_A	genome	NDD	autism	10_100671015_G_A	10	100671015	G	A	60495	HPSE2	-	intron	LINE	1	intronic	HPSE2	.	.	.	.	.	.	.	.	.	.	.	.	.	.	.	.	.	.	SSC	13499.p1	13499	simplex	13499.f1	13499.m1	male	86	443	386
62	2-1738-003||10_100681864_A_G	genome	NDD	autism	10_100681864_A_G	10	100681864	A	G	60495	HPSE2	-	intron	DNA	1	intronic	HPSE2	.	.	.	.	.	.	.	.	.	.	.	.	.	.	.	.	.	.	Yuen2017	2-1738-003	FAM_2-1738-001	SPX	2-1738-002	2-1738-001	M		NA	NA
63	12619.p1||10_100683627_G_A	genome	NDD	autism	10_100683627_G_A	10	100683627	G	A	60495	HPSE2	-	intron	LINE	1	intronic	HPSE2	.	.	.	.	.	.	.	.	.	.	.	.	.	.	.	.	.	.	SSC	12619.p1	12619	simplex	12619.f1	12619.m1	male	87	389	406
64	11835.p1||10_100687817_A_C	genome	NDD	autism	10_100687817_A_C	10	100687817	A	C	60495	HPSE2	-	intron	LINE	1	intronic	HPSE2	.	.	.	.	.	.	.	.	.	.	.	.	.	.	.	.	.	.	Turner_2017	11835.p1							NA	NA
65	13383.p1||10_100701017_G_T	genome	NDD	autism	10_100701017_G_T	10	100701017	G	T	60495	HPSE2	-	intron	LINE	1	intronic	HPSE2	.	.	.	.	.	.	.	.	.	.	.	.	.	.	.	.	.	.	Turner_2017	13383.p1							NA	NA
66	2-1502-003||10_100703530_G_A	genome	NDD	autism	10_100703530_G_A	10	100703530	G	A	60495	HPSE2	-	intron	LTR	1	intronic	HPSE2	.	.	.	.	.	.	.	.	.	.	.	.	.	.	.	.	.	.	Yuen2017	2-1502-003	FAM_2-1502-003	SPX	2-1502-002	2-1502-001	M		NA	NA
67	11414.s1||10_100716082_G_A	genome	control	control	10_100716082_G_A	10	100716082	G	A	60495	HPSE2	-	intron	LINE	1	intronic	HPSE2	.	.	.	.	.	.	.	.	.	.	.	.	.	.	.	.	.	.	Turner_2017;SSC	11414.s1	;11414	;simplex	;11414.f1	;11414.m1	;female	;.	NA;368	NA;351
68	AU024608||10_100734747_C_G	genome	NDD	autism	10_100734747_C_G	10	100734747	C	G	60495	HPSE2	-	intron			intronic	HPSE2	.	.	.	.	.	.	.	.	.	.	.	.	.	.	.	.	.	.	Yuen2017	AU024608	FAM_AU024608	MPX	AU024602	AU024601	F		NA	NA
69	gonl-214c||10_100739726_T_C	genome	control	control	10_100739726_T_C	10	100739726	T	C	60495	HPSE2	-	intron			intronic	HPSE2	.	.	.	.	.	.	.	.	.	.	.	.	.	.	.	.	.	.	GONL	gonl-214c							NA	NA
70	AU056804||10_100743112_C_T	genome	NDD	autism	10_100743112_C_T	10	100743112	C	T	60495	HPSE2	-	intron	DNA	1	intronic	HPSE2	.	.	.	.	.	.	.	.	.	.	.	.	.	.	.	.	.	.	Yuen2017	AU056804	FAM_AU056804	MPX	AU056802	AU056801	M		NA	NA
71	12390.s1||10_100746427_C_G	genome	control	control	10_100746427_C_G	10	100746427	C	G	60495	HPSE2	-	intron	LINE	1	intronic	HPSE2	.	.	.	.	.	.	.	.	.	.	.	.	.	.	.	.	.	.	Turner_2017	12390.s1							NA	NA
72	14370.p1||10_100748595_C_T	genome	NDD	autism	10_100748595_C_T	10	100748595	C	T	60495	HPSE2	-	intron	LINE	1	intronic	HPSE2	.	.	.	.	.	.	.	.	.	.	.	.	.	.	.	.	.	.	Turner_2017	14370.p1							NA	NA
73	3-0438-000||10_100750625_T_C	genome	NDD	autism	10_100750625_T_C	10	100750625	T	C	60495	HPSE2	-	intron			intronic	HPSE2	.	.	.	.	.	.	.	.	.	.	.	.	.	.	.	.	.	.	Yuen2016	3-0438-000							NA	NA
74	AU2109301||10_100754501_G_A	genome	NDD	autism	10_100754501_G_A	10	100754501	G	A	60495	HPSE2	-	intron	LINE	1	intronic	HPSE2	.	.	.	.	.	.	.	.	.	.	.	.	.	.	.	.	.	.	Yuen2017	AU2109301	FAM_AU2109302	SPX	AU2109201	AU2109202	M		NA	NA
75	13546.s1||10_100756284_T_C	genome	control	control	10_100756284_T_C	10	100756284	T	C	60495	HPSE2	-	intron	LINE	1	intronic	HPSE2	.	.	.	.	.	.	.	.	.	.	.	.	.	.	.	.	.	.	Turner_2017;SSC	13546.s1	;13546	;simplex	;13546.f1	;13546.m1	;female	;.	NA;442	NA;316
76	AU2381302||10_100756420_T_C	genome	NDD	autism	10_100756420_T_C	10	100756420	T	C	60495	HPSE2	-	intron	LINE	1	intronic	HPSE2	.	.	.	.	.	.	.	.	.	.	.	.	.	.	.	.	.	.	Yuen2017	AU2381302	FAM_AU2381302	SPX	AU2381201	AU2381202	F		NA	NA
77	1-0193-003||10_100763518_C_T	genome	NDD	autism	10_100763518_C_T	10	100763518	C	T	60495	HPSE2	-	intron	LINE	1	intronic	HPSE2	.	.	.	.	.	.	.	.	.	.	.	.	.	.	.	.	.	.	Yuen2017	1-0193-003	FAM_1-0193-003	SPX	1-0193-002	1-0193-001	M		NA	NA
78	11924.s1||10_100764818_T_C	genome	control	control	10_100764818_T_C	10	100764818	T	C	60495	HPSE2	-	intron	LINE	1	intronic	HPSE2	.	.	.	.	.	.	.	.	.	.	.	.	.	.	.	.	.	.	SSC	11924.s1	11924	simplex	11924.f1	11924.m1	female	.	397	401
79	7-0179-003||10_100770390_T_A	genome	NDD	autism	10_100770390_T_A	10	100770390	T	A	60495	HPSE2	-	intron	LINE	1	intronic	HPSE2	.	.	.	.	.	.	.	.	.	.	.	.	.	.	.	.	.	.	Yuen2017	7-0179-003	FAM_7-0179-003	SPX	7-0179-002	7-0179-001	M		NA	NA
80	14159.p1||10_100792268_T_C	genome	NDD	autism	10_100792268_T_C	10	100792268	T	C	60495	HPSE2	-	intron			intronic	HPSE2	.	.	.	.	.	.	.	.	.	.	.	.	.	.	.	.	.	.	SSC	14159.p1	14159	simplex	14159.f1	14159.m1	male	119	449	435
81	gonl-12c||10_100793881_G_A	genome	control	control	10_100793881_G_A	10	100793881	G	A	60495	HPSE2	-	intron	LINE	1	intronic	HPSE2	.	.	.	.	.	.	.	.	.	.	.	.	.	.	.	.	.	.	GONL	gonl-12c							NA	NA
82	12617.p1||10_100798951_A_C	genome	NDD	autism	10_100798951_A_C	10	100798951	A	C	60495	HPSE2	-	intron			intronic	HPSE2	.	.	.	.	.	.	.	.	.	.	.	.	.	.	.	.	.	.	SSC	12617.p1	12617	simplex	12617.f1	12617.m1	female	112	442	462
83	AU4260303||10_100804073_C_A	genome	NDD	autism	10_100804073_C_A	10	100804073	C	A	60495	HPSE2	-	intron	LINE	1	intronic	HPSE2	.	.	.	.	.	.	.	.	.	.	.	.	.	.	.	.	.	.	Yuen2017	AU4260303	FAM_AU4260303	SPX	AU4260201	AU4260202	M		NA	NA
84	13630.s1||10_100806926_A_T	genome	control	control	10_100806926_A_T	10	100806926	A	T	60495	HPSE2	-	intron	LINE	1	intronic	HPSE2	.	.	.	.	.	.	.	.	.	.	.	.	.	.	.	.	.	.	SSC	13630.s1	13630	simplex	13630.f1	13630.m1	female	.	537	480
85	AU4343302||10_100808713_T_G	genome	NDD	autism	10_100808713_T_G	10	100808713	T	G	60495	HPSE2	-	intron	LINE	1	intronic	HPSE2	.	.	.	.	.	.	.	.	.	.	.	.	.	.	.	.	.	.	Yuen2017	AU4343302	FAM_AU4343302	SPX	AU4343201	AU4343202	M		NA	NA
86	2-0145-003||10_100813442_A_G	genome	NDD	autism	10_100813442_A_G	10	100813442	A	G	60495	HPSE2	-	intron	LINE	1	intronic	HPSE2	.	.	.	.	.	.	.	.	.	.	.	.	.	.	.	.	.	.	Yuen2017	2-0145-003	FAM_2-0145-004	MPX	2-0145-002	2-0145-001	M		NA	NA
87	13575.p1||10_100822826_G_A	genome	NDD	autism	10_100822826_G_A	10	100822826	G	A	60495	HPSE2	-	intron	SINE	1	intronic	HPSE2	.	.	.	.	.	.	.	.	.	.	.	.	.	.	.	.	.	.	Turner_2017;SSC	13575.p1	;13575	;simplex	;13575.f1	;13575.m1	;male	;99	NA;377	NA;430
88	1-0455-003||10_100830983_C_T	genome	NDD	autism	10_100830983_C_T	10	100830983	C	T	60495	HPSE2	-	intron	SINE	1	intronic	HPSE2	.	.	.	.	.	.	.	.	.	.	.	.	.	.	.	.	.	.	Yuen2017	1-0455-003	FAM_1-0455-004	MPX	1-0455-002	1-0455-001	M		NA	NA
89	1-0455-004||10_100830983_C_T	genome	NDD	autism	10_100830983_C_T	10	100830983	C	T	60495	HPSE2	-	intron	SINE	1	intronic	HPSE2	.	.	.	.	.	.	.	.	.	.	.	.	.	.	.	.	.	.	Yuen2017	1-0455-004	FAM_1-0455-004	MPX	1-0455-002	1-0455-001	M		NA	NA
90	2-1185-003||10_100853543_A_G	genome	NDD	autism	10_100853543_A_G	10	100853543	A	G	60495	HPSE2	-	intron	LTR	1	intronic	HPSE2	.	.	.	.	.	.	.	.	.	.	.	.	.	.	.	.	.	.	Yuen2017	2-1185-003	FAM_2-1185-003	SPX	2-1185-002	2-1185-001	M		NA	NA
91	5-0148-003||10_100867212_T_C	genome	NDD	autism	10_100867212_T_C	10	100867212	T	C	60495	HPSE2	-	intron			intronic	HPSE2	.	.	.	.	.	.	.	.	.	.	.	.	.	.	.	.	.	.	Yuen2017	5-0148-003	FAM_5-0148-003	SPX	5-0148-002	5-0148-001	F		NA	NA
92	AU3906301||10_100868605_C_T	genome	NDD	autism	10_100868605_C_T	10	100868605	C	T	60495	HPSE2	-	intron			intronic	HPSE2	.	.	.	.	.	.	.	.	.	.	.	.	.	.	.	.	.	.	Yuen2017	AU3906301	FAM_AU3906303	MPX	AU3906201	AU3906202	F		NA	NA
93	13061.s1||10_100883124_T_C	genome	control	control	10_100883124_T_C	10	100883124	T	C	60495	HPSE2	-	intron	LINE	1	intronic	HPSE2	.	.	.	.	.	.	.	.	.	.	.	.	.	.	.	.	.	.	SSC	13061.s1	13061	simplex	13061.f1	13061.m1	female	.	443	403
94	gonl-55c||10_100903935_C_T	genome	control	control	10_100903935_C_T	10	100903935	C	T	60495	HPSE2	-	intron			intronic	HPSE2	.	.	.	.	.	.	.	.	.	.	.	.	.	.	.	.	.	.	GONL	gonl-55c							NA	NA
95	11834.s1||10_100910798_G_A	genome	control	control	10_100910798_G_A	10	100910798	G	A	60495	HPSE2	-	intron			intronic	HPSE2	.	.	.	.	.	.	.	.	.	.	.	.	.	.	.	.	.	.	SSC	11834.s1	11834	simplex	11834.f1	11834.m1	male	.	362	347
96	14005.s1||10_100914132_G_A	genome	control	control	10_100914132_G_A	10	100914132	G	A	60495	HPSE2	-	intron	LINE	1	intronic	HPSE2	.	.	.	.	.	.	.	.	.	.	.	.	.	.	.	.	.	.	Turner_2017	14005.s1							NA	NA
97	11597.p1||10_100914174_T_C	genome	NDD	autism	10_100914174_T_C	10	100914174	T	C	60495	HPSE2	-	intron	LINE	1	intronic	HPSE2	.	.	.	.	.	.	.	.	.	.	.	.	.	.	.	.	.	.	Turner_2017	11597.p1							NA	NA
98	12582.s1||10_100916593_G_T	genome	control	control	10_100916593_G_T	10	100916593	G	T	60495	HPSE2	-	intron	LINE	1	intronic	HPSE2	.	.	.	.	.	.	.	.	.	.	.	.	.	.	.	.	.	.	Turner_2017	12582.s1							NA	NA
99	12662.s1||10_100916612_T_C	genome	control	control	10_100916612_T_C	10	100916612	T	C	60495	HPSE2	-	intron	LINE	1	intronic	HPSE2	.	.	.	.	.	.	.	.	.	.	.	.	.	.	.	.	.	.	Turner_2017	12662.s1							NA	NA
100	13444.s1||10_100916612_T_C	genome	control	control	10_100916612_T_C	10	100916612	T	C	60495	HPSE2	-	intron	LINE	1	intronic	HPSE2	.	.	.	.	.	.	.	.	.	.	.	.	.	.	.	.	.	.	Turner_2017	13444.s1							NA	NA
101	11942.p1||10_100917276_T_C	genome	NDD	autism	10_100917276_T_C	10	100917276	T	C	60495	HPSE2	-	intron	LINE	1	intronic	HPSE2	.	.	.	.	.	.	.	.	.	.	.	.	.	.	.	.	.	.	Turner_2017	11942.p1							NA	NA
102	13570.s1||10_100920243_C_T	genome	control	control	10_100920243_C_T	10	100920243	C	T	60495	HPSE2	-	intron	LINE	1	intronic	HPSE2	.	.	.	.	.	.	.	.	.	.	.	.	.	.	.	.	.	.	SSC	13570.s1	13570	simplex	13570.f1	13570.m1	male	.	404	452
103	14310.p1||10_100935574_T_C	genome	NDD	autism	10_100935574_T_C	10	100935574	T	C	60495	HPSE2	-	intron	LINE	1	intronic	HPSE2	.	.	.	.	.	.	.	.	.	.	.	.	.	.	.	.	.	.	SSC	14310.p1	14310	simplex	14310.f1	14310.m1	male	102	425	333
104	13175.s1||10_100941149_C_T	genome	control	control	10_100941149_C_T	10	100941149	C	T	60495	HPSE2	-	intron	SINE	1	intronic	HPSE2	.	.	.	.	.	.	.	.	.	.	.	.	.	.	.	.	.	.	Turner_2017	13175.s1							NA	NA
105	12210.s1||10_100945424_G_A	genome	control	control	10_100945424_G_A	10	100945424	G	A	60495	HPSE2	-	intron	SINE	1	intronic	HPSE2	.	.	.	.	.	.	.	.	.	.	.	.	.	.	.	.	.	.	SSC	12210.s1	12210	simplex	12210.f1	12210.m1	male	.	385	377
106	AU054103||10_100948276_T_C	genome	NDD	autism	10_100948276_T_C	10	100948276	T	C	60495	HPSE2	-	intron			intronic	HPSE2	.	.	.	.	.	.	.	.	.	.	.	.	.	.	.	.	.	.	Yuen2017	AU054103	FAM_AU054103	MPX	AU054102	AU054101	M		NA	NA
107	11203.s1||10_100953746_C_T	genome	control	control	10_100953746_C_T	10	100953746	C	T	60495	HPSE2	-	intron	LINE	1	intronic	HPSE2	.	.	.	.	.	.	.	.	.	.	.	.	.	.	.	.	.	.	SSC	11203.s1	11203	simplex	11203.f1	11203.m1	female	.	457	419
108	13741.s1||10_100965750_G_C	genome	control	control	10_100965750_G_C	10	100965750	G	C	60495	HPSE2	-	intron	DNA	1	intronic	HPSE2	.	.	.	.	.	.	.	.	.	.	.	.	.	.	.	.	.	.	Turner_2017;SSC	13741.s1	;13741	;simplex	;13741.f1	;13741.m1	;female	;.	NA;356	NA;267
109	11510.p1||10_100969787_G_C	genome	NDD	autism	10_100969787_G_C	10	100969787	G	C	60495	HPSE2	-	intron	LINE	1	intronic	HPSE2	.	.	.	.	.	.	.	.	.	.	.	.	.	.	.	.	.	.	SSC	11510.p1	11510	simplex	11510.f1	11510.m1	male	81	357	356
110	2-0320-003||10_100981605_G_C	genome	NDD	autism	10_100981605_G_C	10	100981605	G	C	60495	HPSE2	-	intron			intronic	HPSE2	.	.	.	.	.	.	.	.	.	.	.	.	.	.	.	.	.	.	Yuen2017	2-0320-003	FAM_2-0320-003	SPX	2-0320-002	2-0320-001	F		NA	NA
111	12099.s1||10_100982140_G_A	genome	control	control	10_100982140_G_A	10	100982140	G	A	60495	HPSE2	-	intron			intronic	HPSE2	.	.	.	.	.	.	.	.	.	.	.	.	.	.	.	.	.	.	SSC	12099.s1	12099	simplex	12099.f1	12099.m1	male	.	608	420
112	AU051503||10_100987355_A_C	genome	NDD	autism	10_100987355_A_C	10	100987355	A	C	60495	HPSE2	-	intron			intronic	HPSE2	.	.	.	.	.	.	.	.	.	.	.	.	.	.	.	.	.	.	Yuen2017	AU051503	FAM_AU051504	MPX	AU051502	AU051501	F		NA	NA
113	14267.p1||10_10104028_T_C	genome	NDD	autism	10_10104028_T_C	10	10104028	T	C			+	intron	LTR	1	ncRNA_intronic	LOC101928298	.	.	.	.	.	.	.	.	.	.	.	.	.	.	.	.	.	.	SSC	14267.p1	14267	simplex	14267.f1	14267.m1	male	94	300	261
114	12444.p1||10_101089744_C_T	genome	NDD	autism	10_101089744_C_T	10	101089744	C	T	26507	CNNM1	+	CDS			exonic	CNNM1	.	synonymous SNV	CNNM1:NM_001345887:exon1:c.C600T:p.A200A,CNNM1:NM_001345888:exon1:c.C600T:p.A200A,CNNM1:NM_001345889:exon1:c.C600T:p.A200A,CNNM1:NM_020348:exon1:c.C600T:p.A200A	.	.	.	.	.	.	.	.	.	.	.	.	.	.	.	SSC	12444.p1	12444	simplex	12444.f1	12444.m1	female	59	383	373
115	2-1459-003||10_101094340_G_A	genome	NDD	autism	10_101094340_G_A	10	101094340	G	A	26507	CNNM1	+	intron	SINE	1	intronic	CNNM1	.	.	.	.	.	.	.	.	.	.	.	.	.	.	.	.	.	.	Yuen2017	2-1459-003	FAM_2-1459-003	SPX	2-1459-002	2-1459-001	M		NA	NA
116	AU2022302||10_101126548_T_A	genome	NDD	autism	10_101126548_T_A	10	101126548	T	A	26507	CNNM1	+	intron			intronic	CNNM1	.	.	.	.	.	.	.	.	.	.	.	.	.	.	.	.	.	.	Yuen2017	AU2022302	FAM_AU2022302	SPX	AU2022201	AU2022202	M		NA	NA
117	11000.p1||10_101130453_T_C	genome	NDD	autism	10_101130453_T_C	10	101130453	T	C	26507	CNNM1	+	intron			intronic	CNNM1	.	.	.	.	.	.	.	.	.	.	.	.	.	.	.	.	.	.	Turner2016;SSC	11000.p1	;11000	;simplex	;11000.f1	;11000.m1	;male	;78	NA;440	NA;426
118	1-0458-004||10_101131825_G_C	genome	NDD	autism	10_101131825_G_C	10	101131825	G	C	26507	CNNM1	+	intron			intronic	CNNM1	.	.	.	.	.	.	.	.	.	.	.	.	.	.	.	.	.	.	Yuen2017	1-0458-004	FAM_1-0458-005	MPX	1-0458-002	1-0458-001	M		NA	NA
119	11868.p1||10_101134314_T_C	genome	NDD	autism	10_101134314_T_C	10	101134314	T	C	26507	CNNM1	+	intron			intronic	CNNM1	.	.	.	.	.	.	.	.	.	.	.	.	.	.	.	.	.	.	Turner_2017;SSC	11868.p1	;11868	;simplex	;11868.f1	;11868.m1	;male	;91	NA;328	NA;309
120	12792.s1||10_101145131_T_C	genome	control	control	10_101145131_T_C	10	101145131	T	C	26507	CNNM1	+	intron			intronic	CNNM1	.	.	.	.	.	.	.	.	.	.	.	.	.	.	.	.	.	.	SSC	12792.s1	12792	simplex	12792.f1	12792.m1	female	.	474	488
121	AU4079302||10_101146572_G_A	genome	NDD	autism	10_101146572_G_A	10	101146572	G	A	26507	CNNM1	+	intron			intronic	CNNM1	.	.	.	.	.	.	.	.	.	.	.	.	.	.	.	.	.	.	Yuen2017	AU4079302	FAM_AU4079302	MPX	AU4079201	AU4079202	M		NA	NA
122	1-0570-003||10_101166185_A_G	genome	NDD	autism	10_101166185_A_G	10	101166185	A	G	2805	GOT1	-	3'UTR			intronic	GOT1	.	.	.	.	.	.	.	.	.	.	.	.	.	.	.	.	.	.	Yuen2017	1-0570-003	FAM_1-0570-003	SPX	1-0570-002	1-0570-001	F		NA	NA
123	2-0297-004||10_101170954_G_A	genome	NDD	autism	10_101170954_G_A	10	101170954	G	A	2805	GOT1	-	intron			intronic	GOT1	.	.	.	.	.	.	.	.	.	.	.	.	.	.	.	.	.	.	Yuen2017	2-0297-004	FAM_2-0297-004	MPX	2-0297-002	2-0297-001	M		NA	NA
124	11406.s1||10_101171060_A_G	genome	control	control	10_101171060_A_G	10	101171060	A	G	2805	GOT1	-	intron			intronic	GOT1	.	.	.	.	.	.	.	.	.	.	.	.	.	.	.	.	.	.	SSC	11406.s1	11406	simplex	11406.f1	11406.m1	male	.	319	379
125	11142.s1||10_101181276_T_C	genome	control	control	10_101181276_T_C	10	101181276	T	C	2805	GOT1	-	intron			intronic	GOT1	.	.	.	.	.	.	.	.	.	.	.	.	.	.	.	.	.	.	Turner_2017;SSC	11142.s1	;11142	;simplex	;11142.f1	;11142.m1	;female	;.	NA;308	NA;306
126	1-0161-004||10_101383303_C_T	genome	NDD	autism	10_101383303_C_T	10	101383303	C	T	81894	SLC25A28	-	intron			intergenic	SLC25A28;ENTPD7	dist=3082;dist=35831	.	.	.	.	.	.	.	.	.	.	.	.	.	.	.	.	.	Yuen2017	1-0161-004	FAM_1-0161-004	MPX	1-0161-002	1-0161-001	M		NA	NA
127	2-0289-003||10_101384856_T_C	genome	NDD	autism	10_101384856_T_C	10	101384856	T	C	81894	SLC25A28	-	intron	LTR	1	intergenic	SLC25A28;ENTPD7	dist=4635;dist=34278	.	.	.	.	.	.	.	.	.	.	.	.	.	.	.	.	.	Yuen2017	2-0289-003	FAM_2-0289-004	MPX	2-0289-002	2-0289-001	F		NA	NA
128	2-1093-003||10_101384856_T_C	genome	NDD	autism	10_101384856_T_C	10	101384856	T	C	81894	SLC25A28	-	intron	LTR	1	intergenic	SLC25A28;ENTPD7	dist=4635;dist=34278	.	.	.	.	.	.	.	.	.	.	.	.	.	.	.	.	.	Yuen2017	2-1093-003	FAM_2-1093-009	MPX	2-1093-002	2-1093-001	F		NA	NA
129	2-0057-004||10_101384859_A_G	genome	NDD	autism	10_101384859_A_G	10	101384859	A	G	81894	SLC25A28	-	intron	LTR	1	intergenic	SLC25A28;ENTPD7	dist=4638;dist=34275	.	.	.	.	.	.	.	.	.	.	.	.	.	.	.	.	.	Yuen2017	2-0057-004	FAM_2-0057-004	MPX	2-0057-002	2-0057-001	M		NA	NA
130	1-0826-003||10_101384864_G_A	genome	NDD	autism	10_101384864_G_A	10	101384864	G	A	81894	SLC25A28	-	intron	LTR	1	intergenic	SLC25A28;ENTPD7	dist=4643;dist=34270	.	.	.	.	.	.	.	.	.	.	.	.	.	.	.	.	.	Yuen2017	1-0826-003	FAM_1-0826-004	MPX	1-0826-002	1-0826-001	M		NA	NA
131	2-1407-003||10_101401530_C_T	genome	NDD	autism	10_101401530_C_T	10	101401530	C	T	81894	SLC25A28	-	intron	LINE	1	intergenic	SLC25A28;ENTPD7	dist=21309;dist=17604	.	.	.	.	.	.	.	.	.	.	.	.	.	.	.	.	.	Yuen2017	2-1407-003	FAM_2-1407-003	SPX	2-1407-002	2-1407-001	F		NA	NA
132	AU047904||10_101406217_C_T	genome	NDD	autism	10_101406217_C_T	10	101406217	C	T	81894	SLC25A28	-	intron	LINE	1	intergenic	SLC25A28;ENTPD7	dist=25996;dist=12917	.	.	.	.	.	.	.	.	.	.	.	.	.	.	.	.	.	Yuen2017	AU047904	FAM_AU047904	MPX	AU047902	AU047901	M		NA	NA
133	11716.p1||10_101413265_T_C	genome	NDD	autism	10_101413265_T_C	10	101413265	T	C	81894	SLC25A28	-	intron	LTR	1	intergenic	SLC25A28;ENTPD7	dist=33044;dist=5869	.	.	.	.	.	.	.	.	.	.	.	.	.	.	.	.	.	Turner_2017;SSC	11716.p1	;11716	;simplex	;11716.f1	;11716.m1	;male	;78	NA;386	NA;360
134	2-1169-003||10_101424299_C_T	genome	NDD	autism	10_101424299_C_T	10	101424299	C	T	57089	ENTPD7	+	intron	SINE	1	intronic	ENTPD7	.	.	.	.	.	.	.	.	.	.	.	.	.	.	.	.	.	.	Yuen2017	2-1169-003	FAM_2-1169-004	MPX	2-1169-002	2-1169-001	F		NA	NA
135	AU2437302||10_101425367_A_G	genome	NDD	autism	10_101425367_A_G	10	101425367	A	G	57089	ENTPD7	+	intron			intronic	ENTPD7	.	.	.	.	.	.	.	.	.	.	.	.	.	.	.	.	.	.	Yuen2017	AU2437302	FAM_AU2437302	SPX	AU2437201	AU2437202	M		NA	NA
136	gonl-206c||10_101426296_G_A	genome	control	control	10_101426296_G_A	10	101426296	G	A	57089	ENTPD7	+	intron	LINE	1	intronic	ENTPD7	.	.	.	.	.	.	.	.	.	.	.	.	.	.	.	.	.	.	GONL	gonl-206c							NA	NA
137	13076.p1||10_101441711_G_A	genome	NDD	autism	10_101441711_G_A	10	101441711	G	A	57089	ENTPD7	+	intron	LINE	1	intronic	ENTPD7	.	.	.	.	.	.	.	.	.	.	.	.	.	.	.	.	.	.	Turner_2017;SSC	13076.p1	;13076	;simplex	;13076.f1	;13076.m1	;male	;85	NA;633	NA;487
138	2-1561-003||10_101473640_C_T	genome	NDD	autism	10_101473640_C_T	10	101473640	C	T	1355	COX15	-	3'UTR	SINE	1	UTR3	COX15	NM_001320975:c.*885G>A;NM_001320976:c.*704G>A;NM_078470:c.*704G>A	.	.	.	.	.	.	.	.	.	.	.	.	.	.	.	.	.	Yuen2017	2-1561-003	FAM_2-1561-003	SPX	2-1561-002	2-1561-001	M		NA	NA
139	AU3716302||10_101482526_G_A	genome	NDD	autism	10_101482526_G_A	10	101482526	G	A	1355	COX15	-	intron	SINE	1	intronic	COX15	.	.	.	.	.	.	.	.	.	.	.	.	.	.	.	.	.	.	Yuen2017	AU3716302	FAM_AU3716302	MPX	AU3716201	AU3716202	M		NA	NA
140	13069.p1||10_101487730_A_G	genome	NDD	autism	10_101487730_A_G	10	101487730	A	G	1355	COX15	-	intron			intronic	COX15	.	.	.	.	.	.	.	.	.	.	.	.	.	.	.	.	.	.	Turner_2017;SSC	13069.p1	;13069	;simplex	;13069.f1	;13069.m1	;male	;59	NA;522	NA;486
141	2-1142-003||10_101496156_C_T	genome	NDD	autism	10_101496156_C_T	10	101496156	C	T	51076	CUTC	+	intron			intronic	CUTC	.	.	.	.	.	.	.	.	.	.	.	.	.	.	.	.	.	.	Yuen2017	2-1142-003	FAM_2-1142-003	SPX	2-1142-002	2-1142-001	M		NA	NA
142	14675.p1||10_101497155_C_A	genome	NDD	autism	10_101497155_C_A	10	101497155	C	A	51076	CUTC	+	intron	LINE	1	intronic	CUTC	.	.	.	.	.	.	.	.	.	.	.	.	.	.	.	.	.	.	Turner_2017;SSC	14675.p1	;14675	;simplex	;14675.f1	;14675.m1	;male	;90	NA;327	NA;394
143	2-0264-004||10_101506595_A_G	genome	NDD	autism	10_101506595_A_G	10	101506595	A	G	51076	CUTC	+	intron	SINE	1	intronic	CUTC	.	.	.	.	.	.	.	.	.	.	.	.	.	.	.	.	.	.	Yuen2017	2-0264-004	FAM_2-0264-004	SPX	2-0264-002	2-0264-001	M		NA	NA
144	22106.s1||10_101508845_T_G	genome	control	control	10_101508845_T_G	10	101508845	T	G	51076	CUTC	+	intron			intronic	CUTC	.	.	.	.	.	.	.	.	.	.	.	.	.	.	.	.	.	.	SSC	22106.s1	KOR-106	simplex	KOR-106.f1	KOR-106.m1	female		448	412
145	gonl-61c||10_101553777_A_T	genome	control	control	10_101553777_A_T	10	101553777	A	T	1244	ABCC2	+	intron			intronic	ABCC2	.	.	.	.	.	.	.	.	.	.	.	.	.	.	.	.	.	.	GONL	gonl-61c							NA	NA
146	2-1196-003||10_101567519_A_G	genome	NDD	autism	10_101567519_A_G	10	101567519	A	G	1244	ABCC2	+	intron			intronic	ABCC2	.	.	.	.	.	.	.	.	.	.	.	.	.	.	.	.	.	.	Yuen2016	2-1196-003	FAM_2-1196-003	SPX	2-1196-002	2-1196-001	M		NA	NA
147	12977.s1||10_101572374_A_C	genome	control	control	10_101572374_A_C	10	101572374	A	C	1244	ABCC2	+	intron	SINE	1	intronic	ABCC2	.	.	.	.	.	.	.	.	.	.	.	.	.	.	.	.	.	.	SSC	12977.s1	12977	simplex	12977.f1	12977.m1	male	.	411	352
148	1-0067-005||10_101572970_T_C	genome	NDD	autism	10_101572970_T_C	10	101572970	T	C	1244	ABCC2	+	intron			intronic	ABCC2	.	.	.	.	.	.	.	.	.	.	.	.	.	.	.	.	.	.	Yuen2017	1-0067-005	FAM_1-0067-005	MPX	1-0067-002	1-0067-001	M		NA	NA
149	2-0003-003||10_101590441_C_G	genome	NDD	autism	10_101590441_C_G	10	101590441	C	G	1244	ABCC2	+	intron			intronic	ABCC2	.	.	.	.	.	.	.	.	.	.	.	.	.	.	.	.	.	.	Yuen2017	2-0003-003	FAM_2-0003-004	MPX	2-0003-002	2-0003-001	M		NA	NA
150	13324.p1||10_101606037_C_T	genome	NDD	autism	10_101606037_C_T	10	101606037	C	T	1244	ABCC2	+	intron			intronic	ABCC2	.	.	.	.	.	.	.	.	.	.	.	.	.	.	.	.	.	.	Turner_2017;SSC	13324.p1	;13324	;simplex	;13324.f1	;13324.m1	;male	;89	NA;539	NA;477
151	12956.p1||10_101608844_G_T	genome	NDD	autism	10_101608844_G_T	10	101608844	G	T	1244	ABCC2	+	intron	SINE	1	intronic	ABCC2	.	.	.	.	.	.	.	.	.	.	.	.	.	.	.	.	.	.	SSC	12956.p1	12956	simplex	12956.f1	12956.m1	male	91	322	317
152	14648.s1||10_101608983_G_A	genome	control	control	10_101608983_G_A	10	101608983	G	A	1244	ABCC2	+	intron	SINE	1	intronic	ABCC2	.	.	.	.	.	.	.	.	.	.	.	.	.	.	.	.	.	.	Turner_2017;SSC	14648.s1	;14648	;simplex	;14648.f1	;14648.m1	;male	;.	NA;349	NA;339
153	AU3808304||10_101635458_T_A	genome	NDD	autism	10_101635458_T_A	10	101635458	T	A	23268	DNMBP	-	3'UTR			UTR3	DNMBP	NM_015221:c.*1450A>T;NM_001318326:c.*1450A>T;NM_001318327:c.*1450A>T	.	.	.	.	.	.	.	.	.	.	.	.	.	.	.	.	.	Yuen2017	AU3808304	FAM_AU3808305	MPX	AU3808201	AU3808202	M		NA	NA
154	2-1373-003||10_101637319_T_C	genome	NDD	autism	10_101637319_T_C	10	101637319	T	C	23268	DNMBP	-	intron			intronic	DNMBP	.	.	.	.	.	.	.	.	.	.	.	.	.	.	.	.	.	.	Yuen2016	2-1373-003	FAM_2-1373-003	SPX	2-1373-002	2-1373-001	F		NA	NA
155	11041.s1||10_101638580_A_G	genome	control	control	10_101638580_A_G	10	101638580	A	G	23268	DNMBP	-	intron	LINE	1	intronic	DNMBP	.	.	.	.	.	.	.	.	.	.	.	.	.	.	.	.	.	.	SSC	11041.s1	11041	simplex	11041.f1	11041.m1	male	.	320	377
156	11990.s1||10_101639003_C_T	genome	control	control	10_101639003_C_T	10	101639003	C	T	23268	DNMBP	-	intron	SINE	1	intronic	DNMBP	.	.	.	.	.	.	.	.	.	.	.	.	.	.	.	.	.	.	Turner_2017	11990.s1							NA	NA
157	14356.s1||10_101646686_T_C	genome	control	control	10_101646686_T_C	10	101646686	T	C	23268	DNMBP	-	intron			intronic	DNMBP	.	.	.	.	.	.	.	.	.	.	.	.	.	.	.	.	.	.	SSC	14356.s1	14356	simplex	14356.f1	14356.m1	male	.	356	337
158	1-0323-004||10_101658090_G_A	genome	NDD	autism	10_101658090_G_A	10	101658090	G	A	23268	DNMBP	-	intron			intronic	DNMBP	.	.	.	.	.	.	.	.	.	.	.	.	.	.	.	.	.	.	Yuen2017	1-0323-004	FAM_1-0323-004	MPX	1-0323-002	1-0323-001	M		NA	NA
159	2-0256-004||10_101669986_C_T	genome	NDD	autism	10_101669986_C_T	10	101669986	C	T	23268	DNMBP	-	intron			intronic	DNMBP	.	.	.	.	.	.	.	.	.	.	.	.	.	.	.	.	.	.	Yuen2017	2-0256-004	FAM_2-0256-004	MPX	2-0256-002	2-0256-001	M		NA	NA
160	11201.p1||10_101670507_G_A	genome	NDD	autism	10_101670507_G_A	10	101670507	G	A	23268	DNMBP	-	intron	LINE	1	intronic	DNMBP	.	.	.	.	.	.	.	.	.	.	.	.	.	.	.	.	.	.	SSC	11201.p1	11201	simplex	11201.f1	11201.m1	male	78	427	402
161	11054.s1||10_101676124_G_A	genome	control	control	10_101676124_G_A	10	101676124	G	A	23268	DNMBP	-	intron	SINE	1	intronic	DNMBP	.	.	.	.	.	.	.	.	.	.	.	.	.	.	.	.	.	.	SSC	11054.s1	11054	simplex	11054.f1	11054.m1	male	.	306	257
162	14385.p1||10_101676222_C_A	genome	NDD	autism	10_101676222_C_A	10	101676222	C	A	23268	DNMBP	-	intron			intronic	DNMBP	.	.	.	.	.	.	.	.	.	.	.	.	.	.	.	.	.	.	SSC	14385.p1	14385	simplex	14385.f1	14385.m1	female	81	350	352
163	AU4159301||10_101677591_C_G	genome	NDD	autism	10_101677591_C_G	10	101677591	C	G	23268	DNMBP	-	intron	SINE	1	intronic	DNMBP	.	.	.	.	.	.	.	.	.	.	.	.	.	.	.	.	.	.	Yuen2017	AU4159301	FAM_AU4159302	MPX	AU4159201	AU4159202	M		NA	NA
164	2-0223-003||10_101677985_C_T	genome	NDD	autism	10_101677985_C_T	10	101677985	C	T	23268	DNMBP	-	intron			intronic	DNMBP	.	.	.	.	.	.	.	.	.	.	.	.	.	.	.	.	.	.	Yuen2017	2-0223-003	FAM_2-0223-004	MPX	2-0223-002	2-0223-001	M		NA	NA
165	AU4154303||10_101682257_C_T	genome	NDD	autism	10_101682257_C_T	10	101682257	C	T	23268	DNMBP	-	intron			intronic	DNMBP	.	.	.	.	.	.	.	.	.	.	.	.	.	.	.	.	.	.	Yuen2017	AU4154303	FAM_AU4154303	SPX	AU4154201	AU4154202	M		NA	NA
166	14469.s1||10_101715714_G_A	genome	control	control	10_101715714_G_A	10	101715714	G	A	23268	DNMBP	-	CDS			exonic	DNMBP	.	nonsynonymous SNV	DNMBP:NM_015221:exon4:c.C1517T:p.T506I	D	B	B	N	N	L	T	N	T	T	T	N	2.627	1.047	0.007	SSC	14469.s1	14469	simplex	14469.f1	14469.m1	male	.	408	360
167	12060.s1||10_101716819_C_T	genome	control	control	10_101716819_C_T	10	101716819	C	T	23268	DNMBP	-	CDS			exonic	DNMBP	.	nonsynonymous SNV	DNMBP:NM_015221:exon4:c.G412A:p.A138T	T	B	B	N	N	N	T	N	T	T	T	N	15.11	0.934	0.191	Turner_2017;SSC	12060.s1	;12060	;simplex	;12060.f1	;12060.m1	;female	;.	NA;317	NA;258
168	AU2292301|AU2292302||10_101720099_T_C	genome	NDD	autism	10_101720099_T_C	10	101720099	T	C	23268	DNMBP	-	intron			intronic	DNMBP	.	.	.	.	.	.	.	.	.	.	.	.	.	.	.	.	.	.	Yuen2017	AU2292301|AU2292302	FAM_AU2292302	SPX	AU2292201	AU2292202	M		NA	NA
169	11615.p1||10_101725418_C_T	genome	NDD	autism	10_101725418_C_T	10	101725418	C	T	23268	DNMBP	-	intron	SINE	1	intronic	DNMBP	.	.	.	.	.	.	.	.	.	.	.	.	.	.	.	.	.	.	Turner_2017;SSC	11615.p1	;11615	;simplex	;11615.f1	;11615.m1	;male	;83	NA;346	NA;351
170	13722.p1||10_101736671_G_T	genome	NDD	autism	10_101736671_G_T	10	101736671	G	T	23268	DNMBP	-	intron			intronic	DNMBP	.	.	.	.	.	.	.	.	.	.	.	.	.	.	.	.	.	.	SSC	13722.p1	13722	simplex	13722.f1	13722.m1	male	70	438	352
171	gonl-151c||10_101737051_T_C	genome	control	control	10_101737051_T_C	10	101737051	T	C	23268	DNMBP	-	intron			intronic	DNMBP	.	.	.	.	.	.	.	.	.	.	.	.	.	.	.	.	.	.	GONL	gonl-151c							NA	NA
172	AU3398301||10_101747022_G_C	genome	NDD	autism	10_101747022_G_C	10	101747022	G	C	23268	DNMBP	-	intron	SINE	1	intronic	DNMBP	.	.	.	.	.	.	.	.	.	.	.	.	.	.	.	.	.	.	Yuen2017	AU3398301	FAM_AU3398301	SPX	AU3398201	AU3398202	M		NA	NA
173	12838.s1||10_101757298_G_A	genome	control	control	10_101757298_G_A	10	101757298	G	A	23268	DNMBP	-	intron			intronic	DNMBP	.	.	.	.	.	.	.	.	.	.	.	.	.	.	.	.	.	.	SSC	12838.s1	12838	simplex	12838.f1	12838.m1	female	.	246	224
174	gonl-147c||10_101804979_C_T	genome	control	control	10_101804979_C_T	10	101804979	C	T	1369	CPN1	-	intron			intronic	CPN1	.	.	.	.	.	.	.	.	.	.	.	.	.	.	.	.	.	.	GONL	gonl-147c							NA	NA
175	13502.p1||10_101808312_C_G	genome	NDD	autism	10_101808312_C_G	10	101808312	C	G	1369	CPN1	-	intron	SINE	1	intronic	CPN1	.	.	.	.	.	.	.	.	.	.	.	.	.	.	.	.	.	.	Turner_2017;SSC	13502.p1	;13502	;simplex	;13502.f1	;13502.m1	;male	;71	NA;367	NA;494
176	AU056804||10_101815135_T_G	genome	NDD	autism	10_101815135_T_G	10	101815135	T	G	1369	CPN1	-	intron	LINE	1	intronic	CPN1	.	.	.	.	.	.	.	.	.	.	.	.	.	.	.	.	.	.	Yuen2017	AU056804	FAM_AU056804	MPX	AU056802	AU056801	M		NA	NA
177	12780.s1||10_101821902_G_A	genome	control	control	10_101821902_G_A	10	101821902	G	A	1369	CPN1	-	intron			intronic	CPN1	.	.	.	.	.	.	.	.	.	.	.	.	.	.	.	.	.	.	SSC	12780.s1	12780	simplex	12780.f1	12780.m1	male	.	399	463
178	11239.p1||10_101836450_G_T	genome	NDD	autism	10_101836450_G_T	10	101836450	G	T	1369	CPN1	-	intron			intronic	CPN1	.	.	.	.	.	.	.	.	.	.	.	.	.	.	.	.	.	.	Turner_2017;SSC	11239.p1	;11239	;simplex	;11239.f1	;11239.m1	;female	;109	NA;437	NA;376
179	13520.p1||10_101915052_C_G	genome	NDD	autism	10_101915052_C_G	10	101915052	C	G	10613	ERLIN1	-	intron			intronic	ERLIN1	.	.	.	.	.	.	.	.	.	.	.	.	.	.	.	.	.	.	SSC	13520.p1	13520	simplex	13520.f1	13520.m1	male	105	480	480
180	11172.s1||10_101921158_G_A	genome	control	control	10_101921158_G_A	10	101921158	G	A	10613	ERLIN1	-	intron	LINE	1	intronic	ERLIN1	.	.	.	.	.	.	.	.	.	.	.	.	.	.	.	.	.	.	SSC	11172.s1	11172	simplex	11172.f1	11172.m1	female	.	422	406
181	14443.s1||10_101939936_C_A	genome	control	control	10_101939936_C_A	10	101939936	C	A	10613	ERLIN1	-	intron			intronic	ERLIN1	.	.	.	.	.	.	.	.	.	.	.	.	.	.	.	.	.	.	SSC	14443.s1	14443	simplex	14443.f1	14443.m1	female	.	461	460
182	AU1940304||10_101999744_C_A	genome	NDD	autism	10_101999744_C_A	10	101999744	C	A	55280	CWF19L1	-	intron			intronic	CWF19L1	.	.	.	.	.	.	.	.	.	.	.	.	.	.	.	.	.	.	Yuen2017	AU1940304	FAM_AU1940304	MPX	AU1940201	AU1940202	M		NA	NA
183	AU043804||10_102013637_G_T	genome	NDD	autism	10_102013637_G_T	10	102013637	G	T	55280	CWF19L1	-	intron	SINE	1	intronic	CWF19L1	.	.	.	.	.	.	.	.	.	.	.	.	.	.	.	.	.	.	Yuen2017	AU043804	FAM_AU043804	MPX	AU043802	AU043801	M		NA	NA
184	13703.s1||10_102018262_G_C	genome	control	control	10_102018262_G_C	10	102018262	G	C	55280	CWF19L1	-	intron			intronic	CWF19L1	.	.	.	.	.	.	.	.	.	.	.	.	.	.	.	.	.	.	SSC	13703.s1	13703	simplex	13703.f1	13703.m1	female	.	454	277
185	13703.s1||10_102025562_G_C	genome	control	control	10_102025562_G_C	10	102025562	G	C	55280	CWF19L1	-	intron	SINE	1	intronic	CWF19L1	.	.	.	.	.	.	.	.	.	.	.	.	.	.	.	.	.	.	SSC	13703.s1	13703	simplex	13703.f1	13703.m1	female	.	454	277
186	14698.s1||10_102040434_G_C	genome	control	control	10_102040434_G_C	10	102040434	G	C	282991	BLOC1S2	-	intron			intronic	BLOC1S2	.	.	.	.	.	.	.	.	.	.	.	.	.	.	.	.	.	.	SSC	14698.s1	14698	simplex	14698.f1	14698.m1	female	.	359	370
187	2-0300-004||10_102054439_C_T	genome	NDD	autism	10_102054439_C_T	10	102054439	C	T	9033	PKD2L1	-	intron			intronic	PKD2L1	.	.	.	.	.	.	.	.	.	.	.	.	.	.	.	.	.	.	Yuen2017	2-0300-004	FAM_2-0300-004	MPX	2-0300-002	2-0300-001	F		NA	NA
188	11241.p1||10_102061340_G_A	genome	NDD	autism	10_102061340_G_A	10	102061340	G	A	9033	PKD2L1	-	intron	LTR	1	intronic	PKD2L1	.	.	.	.	.	.	.	.	.	.	.	.	.	.	.	.	.	.	Turner_2017;SSC	11241.p1	;11241	;simplex	;11241.f1	;11241.m1	;male	;77	NA;461	NA;425
189	13836.p1||10_102065423_G_T	genome	NDD	autism	10_102065423_G_T	10	102065423	G	T	9033	PKD2L1	-	intron			intronic	PKD2L1	.	.	.	.	.	.	.	.	.	.	.	.	.	.	.	.	.	.	Turner_2017;SSC	13836.p1	;13836	;simplex	;13836.f1	;13836.m1	;male	;105	NA;302	NA;270
190	14292.p1||10_102065794_T_C	genome	NDD	autism	10_102065794_T_C	10	102065794	T	C	9033	PKD2L1	-	intron	SINE	1	intronic	PKD2L1	.	.	.	.	.	.	.	.	.	.	.	.	.	.	.	.	.	.	SSC	14292.p1	14292	simplex	14292.f1	14292.m1	male	49	505	497
191	AU4013302||10_102067227_G_A	genome	NDD	autism	10_102067227_G_A	10	102067227	G	A	9033	PKD2L1	-	intron	SINE	1	intronic	PKD2L1	.	.	.	.	.	.	.	.	.	.	.	.	.	.	.	.	.	.	Yuen2017	AU4013302	FAM_AU4013303	MPX	AU4013201	AU4013202	M		NA	NA
192	AU3051303||10_102070450_T_A	genome	NDD	autism	10_102070450_T_A	10	102070450	T	A	9033	PKD2L1	-	intron	LINE	1	intronic	PKD2L1	.	.	.	.	.	.	.	.	.	.	.	.	.	.	.	.	.	.	Yuen2017	AU3051303	FAM_AU3051303	MPX	AU3051201	AU3051202	M		NA	NA
193	2-0007-003||10_102072515_T_C	genome	NDD	autism	10_102072515_T_C	10	102072515	T	C	9033	PKD2L1	-	intron			intronic	PKD2L1	.	.	.	.	.	.	.	.	.	.	.	.	.	.	.	.	.	.	Yuen2017	2-0007-003	FAM_2-0007-004	MPX	2-0007-002	2-0007-001	M		NA	NA
194	12541.p1||10_102108895_G_A	genome	NDD	autism	10_102108895_G_A	10	102108895	G	A	6319	SCD	+	intron			intronic	SCD	.	.	.	.	.	.	.	.	.	.	.	.	.	.	.	.	.	.	SSC	12541.p1	12541	simplex	12541.f1	12541.m1	male	133	498	320
195	13575.p1||10_102111459_G_A	genome	NDD	autism	10_102111459_G_A	10	102111459	G	A	6319	SCD	+	intron	SINE	1	intronic	SCD	.	.	.	.	.	.	.	.	.	.	.	.	.	.	.	.	.	.	Turner_2017;SSC	13575.p1	;13575	;simplex	;13575.f1	;13575.m1	;male	;99	NA;377	NA;430
196	11600.p1||10_102112796_T_G	genome	NDD	autism	10_102112796_T_G	10	102112796	T	G	6319	SCD	+	intron			intronic	SCD	.	.	.	.	.	.	.	.	.	.	.	.	.	.	.	.	.	.	SSC	11600.p1	11600	simplex	11600.f1	11600.m1	male	112	437	379
197	11353.p1||10_102117316_A_G	genome	NDD	autism	10_102117316_A_G	10	102117316	A	G	6319	SCD	+	intron			intronic	SCD	.	.	.	.	.	.	.	.	.	.	.	.	.	.	.	.	.	.	SSC	11353.p1	11353	simplex	11353.f1	11353.m1	female	77	376	365
198	1-0925-003||10_102117603_C_T	genome	NDD	autism	10_102117603_C_T	10	102117603	C	T	6319	SCD	+	intron			intronic	SCD	.	.	.	.	.	.	.	.	.	.	.	.	.	.	.	.	.	.	Yuen2017	1-0925-003	FAM_1-0925-003	SPX	1-0925-002	1-0925-001	F		NA	NA
199	13705.s1||10_102146817_G_A	genome	control	control	10_102146817_G_A	10	102146817	G	A	90271	LINC00263	+	intron	LTR	1	ncRNA_intronic	OLMALINC	.	.	.	.	.	.	.	.	.	.	.	.	.	.	.	.	.	.	SSC	13705.s1	13705	simplex	13705.f1	13705.m1	female	.	470	392
200	gonl-224c||10_102242982_A_T	genome	control	control	10_102242982_A_T	10	102242982	A	T	7479	WNT8B	+	3'UTR			UTR3	WNT8B	NM_003393:c.*409A>T	.	.	.	.	.	.	.	.	.	.	.	.	.	.	.	.	.	GONL	gonl-224c							NA	NA
201	AU4012302||10_102255844_T_C	genome	NDD	autism	10_102255844_T_C	10	102255844	T	C	25956	SEC31B	-	intron	LINE	1	intronic	SEC31B	.	.	.	.	.	.	.	.	.	.	.	.	.	.	.	.	.	.	Yuen2017	AU4012302	FAM_AU4012302	SPX	AU4012201	AU4012202	M		NA	NA
202	11657.p1||10_102260856_T_C	genome	NDD	autism	10_102260856_T_C	10	102260856	T	C	25956	SEC31B	-	intron	SINE	1	intronic	SEC31B	.	.	.	.	.	.	.	.	.	.	.	.	.	.	.	.	.	.	SSC	11657.p1	11657	simplex	11657.f1	11657.m1	male	75	434	358
203	2-0129-005||10_102268419_T_A	genome	NDD	autism	10_102268419_T_A	10	102268419	T	A	25956	SEC31B	-	5'UTR			intronic	SEC31B	.	.	.	.	.	.	.	.	.	.	.	.	.	.	.	.	.	.	Yuen2017	2-0129-005	FAM_2-0129-005	MPX	2-0129-002	2-0129-001	M		NA	NA
204	11839.s1||10_102274505_A_G	genome	control	control	10_102274505_A_G	10	102274505	A	G	25956	SEC31B	-	intron			intronic	SEC31B	.	.	.	.	.	.	.	.	.	.	.	.	.	.	.	.	.	.	Turner_2017;SSC	11839.s1	;11839	;simplex	;11839.f1	;11839.m1	;female	;.	NA;381	NA;392
205	gonl-72c||10_102310197_C_G	genome	control	control	10_102310197_C_G	10	102310197	C	G	55662	HIF1AN	+	3'UTR	SINE	1	UTR3	HIF1AN	NM_017902:c.*2303C>G	.	.	.	.	.	.	.	.	.	.	.	.	.	.	.	.	.	GONL	gonl-72c							NA	NA
206	gonl-62c||10_102513215_A_G	genome	control	control	10_102513215_A_G	10	102513215	A	G	5076	PAX2	+	intron			intronic	PAX2	.	.	.	.	.	.	.	.	.	.	.	.	.	.	.	.	.	.	GONL	gonl-62c							NA	NA
207	12281.p1||10_102516234_C_T	genome	NDD	autism	10_102516234_C_T	10	102516234	C	T	5076	PAX2	+	intron	DNA	1	intronic	PAX2	.	.	.	.	.	.	.	.	.	.	.	.	.	.	.	.	.	.	SSC	12281.p1	12281	simplex	12281.f1	12281.m1	male	99	436	428
208	7-0223-003||10_102532228_C_G	genome	NDD	autism	10_102532228_C_G	10	102532228	C	G	5076	PAX2	+	intron			intronic	PAX2	.	.	.	.	.	.	.	.	.	.	.	.	.	.	.	.	.	.	Yuen2017	7-0223-003	FAM_7-0223-003	SPX	7-0223-002	7-0223-001	M		NA	NA
209	1-0339-003||10_102542787_C_T	genome	NDD	autism	10_102542787_C_T	10	102542787	C	T	5076	PAX2	+	intron			intronic	PAX2	.	.	.	.	.	.	.	.	.	.	.	.	.	.	.	.	.	.	Yuen2017	1-0339-003	FAM_1-0339-004	MPX	1-0339-002	1-0339-001	M		NA	NA
210	12373.s1||10_102559064_G_A	genome	control	control	10_102559064_G_A	10	102559064	G	A	5076	PAX2	+	intron			intronic	PAX2	.	.	.	.	.	.	.	.	.	.	.	.	.	.	.	.	.	.	SSC	12373.s1	12373	simplex	12373.f1	12373.m1	female	.	426	409
211	13526.p1||10_102563225_G_C	genome	NDD	autism	10_102563225_G_C	10	102563225	G	C	5076	PAX2	+	intron			intronic	PAX2	.	.	.	.	.	.	.	.	.	.	.	.	.	.	.	.	.	.	SSC	13526.p1	13526	simplex	13526.f1	13526.m1	male	97	410	376
212	12299.p1||10_102565285_G_A	genome	NDD	autism	10_102565285_G_A	10	102565285	G	A	5076	PAX2	+	intron			intronic	PAX2	.	.	.	.	.	.	.	.	.	.	.	.	.	.	.	.	.	.	SSC	12299.p1	12299	simplex	12299.f1	12299.m1	male	113	431	376
213	14210.s1||10_102566988_A_G	genome	control	control	10_102566988_A_G	10	102566988	A	G	5076	PAX2	+	intron			intronic	PAX2	.	.	.	.	.	.	.	.	.	.	.	.	.	.	.	.	.	.	SSC	14210.s1	14210	simplex	14210.f1	14210.m1	male	.	385	394
214	13107.p1||10_102568304_G_A	genome	NDD	autism	10_102568304_G_A	10	102568304	G	A	5076	PAX2	+	intron			intronic	PAX2	.	.	.	.	.	.	.	.	.	.	.	.	.	.	.	.	.	.	SSC	13107.p1	13107	simplex	13107.f1	13107.m1	male	94	377	389
215	11399.p1||10_102589693_A_G	genome	NDD	autism	10_102589693_A_G	10	102589693	A	G	5076	PAX2	+	3'UTR			UTR3	PAX2	NM_001304569:c.*2317A>G;NM_000278:c.*2317A>G;NM_003990:c.*2253A>G;NM_003988:c.*2394A>G;NM_003987:c.*2317A>G;NM_003989:c.*2253A>G	.	.	.	.	.	.	.	.	.	.	.	.	.	.	.	.	.	SSC	11399.p1	11399	simplex	11399.f1	11399.m1	male	110	363	312
216	12201.p1||10_102679486_T_C	genome	NDD	autism	10_102679486_T_C	10	102679486	T	C	55719	FAM178A	+	intron			intronic	SLF2	.	.	.	.	.	.	.	.	.	.	.	.	.	.	.	.	.	.	SSC	12201.p1	12201	simplex	12201.f1	12201.m1	male	131	358	320
217	13120.p1||10_102682555_C_T	genome	NDD	autism	10_102682555_C_T	10	102682555	C	T	55719	FAM178A	+	intron	SINE	1	intronic	SLF2	.	.	.	.	.	.	.	.	.	.	.	.	.	.	.	.	.	.	SSC	13120.p1	13120	simplex	13120.f1	13120.m1	male	109	430	451
218	AU1995302||10_102683121_T_C	genome	NDD	autism	10_102683121_T_C	10	102683121	T	C	55719	FAM178A	+	intron	LTR	1	intronic	SLF2	.	.	.	.	.	.	.	.	.	.	.	.	.	.	.	.	.	.	Yuen2017	AU1995302	FAM_AU1995302	SPX	AU1995201	AU1995202	M		NA	NA
219	14606.s1||10_102683249_T_C	genome	control	control	10_102683249_T_C	10	102683249	T	C	55719	FAM178A	+	intron	LTR	1	intronic	SLF2	.	.	.	.	.	.	.	.	.	.	.	.	.	.	.	.	.	.	SSC	14606.s1	14606	simplex	14606.f1	14606.m1	female	.	355	359
220	11834.p1||10_102687533_T_G	genome	NDD	autism	10_102687533_T_G	10	102687533	T	G	55719	FAM178A	+	intron	LINE	1	intronic	SLF2	.	.	.	.	.	.	.	.	.	.	.	.	.	.	.	.	.	.	SSC	11834.p1	11834	simplex	11834.f1	11834.m1	male	93	336	321
221	12011.s1||10_102693618_T_C	genome	control	control	10_102693618_T_C	10	102693618	T	C	55719	FAM178A	+	intron	SINE	1	intronic	SLF2	.	.	.	.	.	.	.	.	.	.	.	.	.	.	.	.	.	.	Turner_2017;SSC	12011.s1	;12011	;simplex	;12011.f1	;12011.m1	;male	;.	NA;544	NA;453
222	13993.p1||10_102700683_C_A	genome	NDD	autism	10_102700683_C_A	10	102700683	C	A	55719	FAM178A	+	intron	SINE	1	intronic	SLF2	.	.	.	.	.	.	.	.	.	.	.	.	.	.	.	.	.	.	SSC	13993.p1	13993	simplex	13993.f1	13993.m1	male	45	564	415
223	11611.p1||10_102702890_A_G	genome	NDD	autism	10_102702890_A_G	10	102702890	A	G	55719	FAM178A	+	intron	LTR	1	intronic	SLF2	.	.	.	.	.	.	.	.	.	.	.	.	.	.	.	.	.	.	SSC	11611.p1	11611	simplex	11611.f1	11611.m1	female	34	414	360
224	AU4145301||10_102704113_A_G	genome	NDD	autism	10_102704113_A_G	10	102704113	A	G	55719	FAM178A	+	intron	SINE	1	intronic	SLF2	.	.	.	.	.	.	.	.	.	.	.	.	.	.	.	.	.	.	Yuen2017	AU4145301	FAM_AU4145303	MPX	AU4145201	AU4145202	M		NA	NA
225	1-0196-005||10_102710687_G_T	genome	NDD	autism	10_102710687_G_T	10	102710687	G	T	55719	FAM178A	+	intron			intronic	SLF2	.	.	.	.	.	.	.	.	.	.	.	.	.	.	.	.	.	.	Yuen2017	1-0196-005	FAM_1-0196-005	SPX	1-0196-002	1-0196-001	M		NA	NA
226	11818.p1||10_102753262_A_C	genome	NDD	autism	10_102753262_A_C	10	102753262	A	C	56652	C10orf2	+	CDS||3'UTR			exonic	TWNK	.	nonsynonymous SNV	TWNK:NM_001163813:exon5:c.A688C:p.K230Q,TWNK:NM_021830:exon5:c.A2050C:p.K684Q	T	B	B	N	N	N	D	N	T	T	D	N	0.139	-0.164	0.008	Turner_2017;SSC	11818.p1	;11818	;simplex	;11818.f1	;11818.m1	;male	;44	NA;449	NA;401
227	AU3858302||10_102758966_G_C	genome	NDD	autism	10_102758966_G_C	10	102758966	G	C	84445	LZTS2	+	intron			intronic	LZTS2	.	.	.	.	.	.	.	.	.	.	.	.	.	.	.	.	.	.	Yuen2017	AU3858302	FAM_AU3858303	MPX	AU3858201	AU3858202	M		NA	NA
228	7-0249-003||10_102760138_C_T	genome	NDD	autism	10_102760138_C_T	10	102760138	C	T	84445	LZTS2	+	5'UTR			intronic	LZTS2	.	.	.	.	.	.	.	.	.	.	.	.	.	.	.	.	.	.	Yuen2017	7-0249-003	FAM_7-0249-004	MPX	7-0249-002	7-0249-001	F		NA	NA
229	14685.p1||10_102761420_G_A	genome	NDD	autism	10_102761420_G_A	10	102761420	G	A	84445	LZTS2	+	5'UTR			intronic	LZTS2	.	.	.	.	.	.	.	.	.	.	.	.	.	.	.	.	.	.	SSC	14685.p1	14685	simplex	14685.f1	14685.m1	male	108	366	361
230	11966.s1||10_102766232_C_T	genome	control	control	10_102766232_C_T	10	102766232	C	T	84445	LZTS2	+	intron			intronic	LZTS2	.	.	.	.	.	.	.	.	.	.	.	.	.	.	.	.	.	.	SSC	11966.s1	11966	simplex	11966.f1	11966.m1	male	.	402	477
231	22015.s1||10_102774239_C_T	genome	control	control	10_102774239_C_T	10	102774239	C	T	79955	PDZD7	-	intron			intronic	PDZD7	.	.	.	.	.	.	.	.	.	.	.	.	.	.	.	.	.	.	SSC	22015.s1	KOR-015	simplex	KOR-015.f1	KOR-015.m1	female		335	301
232	11489.p1||10_102789023_C_T	genome	NDD	autism	10_102789023_C_T	10	102789023	C	T	79955	PDZD7	-	intron			intronic	PDZD7	.	.	.	.	.	.	.	.	.	.	.	.	.	.	.	.	.	.	SSC	11489.p1	11489	simplex	11489.f1	11489.m1	male	108	479	413
233	12243.p1||10_102850179_C_G	genome	NDD	autism	10_102850179_C_G	10	102850179	C	G	100038246	TLX1NB	-	5'UTR			ncRNA_exonic	TLX1NB	.	.	.	.	.	.	.	.	.	.	.	.	.	.	.	.	.	.	SSC	12243.p1	12243	simplex	12243.f1	12243.m1	male	92	359	404
234	AU3154301||10_102856816_C_T	genome	NDD	autism	10_102856816_C_T	10	102856816	C	T	100038246	TLX1NB	-	intron			ncRNA_intronic	TLX1NB	.	.	.	.	.	.	.	.	.	.	.	.	.	.	.	.	.	.	Yuen2017	AU3154301	FAM_AU3154302	MPX	AU3154201	AU3154202	F		NA	NA
235	12197.s1||10_102865735_G_A	genome	control	control	10_102865735_G_A	10	102865735	G	A	100038246	TLX1NB	-	intron	SINE	1	ncRNA_intronic	TLX1NB	.	.	.	.	.	.	.	.	.	.	.	.	.	.	.	.	.	.	SSC	12197.s1	12197	simplex	12197.f1	12197.m1	female	.	392	382
236	12197.p1||10_102884402_T_C	genome	NDD	autism	10_102884402_T_C	10	102884402	T	C	100038246	TLX1NB	-	intron			ncRNA_intronic	TLX1NB	.	.	.	.	.	.	.	.	.	.	.	.	.	.	.	.	.	.	SSC	12197.p1	12197	simplex	12197.f1	12197.m1	male	100	392	382
237	14661.p1||10_102887097_G_A	genome	NDD	autism	10_102887097_G_A	10	102887097	G	A	100038246	TLX1NB	-	intron			ncRNA_intronic	TLX1NB	.	.	.	.	.	.	.	.	.	.	.	.	.	.	.	.	.	.	SSC	14661.p1	14661	simplex	14661.f1	14661.m1	male	104	422	333
238	2-1366-004||10_102887586_A_G	genome	NDD	autism	10_102887586_A_G	10	102887586	A	G	100038246	TLX1NB	-	intron			ncRNA_intronic	TLX1NB	.	.	.	.	.	.	.	.	.	.	.	.	.	.	.	.	.	.	Yuen2017	2-1366-004	FAM_2-1366-004	MPX	2-1366-002	2-1366-001	F		NA	NA
239	gonl-80c||10_102890565_C_G	genome	control	control	10_102890565_C_G	10	102890565	C	G	100038246	TLX1NB	-	5'UTR			ncRNA_exonic	TLX1NB	.	.	.	.	.	.	.	.	.	.	.	.	.	.	.	.	.	.	GONL	gonl-80c							NA	NA
240	13855.s1||10_103014199_A_G	genome	control	control	10_103014199_A_G	10	103014199	A	G			-	exon_unclassified			ncRNA_exonic	LOC101927419	.	.	.	.	.	.	.	.	.	.	.	.	.	.	.	.	.	.	SSC	13855.s1	13855	simplex	13855.f1	13855.m1	female	.	473	498
241	12457.s1||10_103019981_C_A	genome	control	control	10_103019981_C_A	10	103019981	C	A			-	intron			ncRNA_intronic	LOC101927419	.	.	.	.	.	.	.	.	.	.	.	.	.	.	.	.	.	.	SSC	12457.s1	12457	simplex	12457.f1	12457.m1	male	.	420	411
242	2-1283-003|2-1283-004||10_103116019_G_C	genome	NDD	autism	10_103116019_G_C	10	103116019	G	C	8945	BTRC	+	intron	SINE	1	intronic	BTRC	.	.	.	.	.	.	.	.	.	.	.	.	.	.	.	.	.	.	Yuen2017	2-1283-003|2-1283-004	FAM_2-1283-004	MPX	2-1283-002	2-1283-001	M		NA	NA
243	11329.p1||10_103120467_C_T	genome	NDD	autism	10_103120467_C_T	10	103120467	C	T	8945	BTRC	+	intron	SINE	1	intronic	BTRC	.	.	.	.	.	.	.	.	.	.	.	.	.	.	.	.	.	.	SSC	11329.p1	11329	simplex	11329.f1	11329.m1	male	105	330	300
244	14213.p1||10_103167711_C_G	genome	NDD	autism	10_103167711_C_G	10	103167711	C	G	8945	BTRC	+	intron	SINE	1	intronic	BTRC	.	.	.	.	.	.	.	.	.	.	.	.	.	.	.	.	.	.	SSC	14213.p1	14213	simplex	14213.f1	14213.m1	male	33	456	417
245	14454.p1||10_103168286_A_G	genome	NDD	autism	10_103168286_A_G	10	103168286	A	G	8945	BTRC	+	intron	SINE	1	intronic	BTRC	.	.	.	.	.	.	.	.	.	.	.	.	.	.	.	.	.	.	SSC	14454.p1	14454	simplex	14454.f1	14454.m1	male	30	402	436
246	11492.p1||10_103170098_G_A	genome	NDD	autism	10_103170098_G_A	10	103170098	G	A	8945	BTRC	+	intron	SINE	1	intronic	BTRC	.	.	.	.	.	.	.	.	.	.	.	.	.	.	.	.	.	.	SSC	11492.p1	11492	simplex	11492.f1	11492.m1	male	107	375	345
247	12001.s1||10_103178471_T_A	genome	control	control	10_103178471_T_A	10	103178471	T	A	8945	BTRC	+	intron	LINE	1	intronic	BTRC	.	.	.	.	.	.	.	.	.	.	.	.	.	.	.	.	.	.	Turner_2017;SSC	12001.s1	;12001	;simplex	;12001.f1	;12001.m1	;female	;.	NA;369	NA;363
248	1-0595-005||10_103184075_G_A	genome	NDD	autism	10_103184075_G_A	10	103184075	G	A	8945	BTRC	+	intron	SINE	1	intronic	BTRC	.	.	.	.	.	.	.	.	.	.	.	.	.	.	.	.	.	.	Yuen2017	1-0595-005	FAM_1-0595-005	MPX	1-0595-002	1-0595-001	M		NA	NA
249	11812.s1||10_103198151_C_T	genome	control	control	10_103198151_C_T	10	103198151	C	T	8945	BTRC	+	intron	SINE	1	intronic	BTRC	.	.	.	.	.	.	.	.	.	.	.	.	.	.	.	.	.	.	Turner_2017	11812.s1							NA	NA
250	13590.s1||10_103214584_C_T	genome	control	control	10_103214584_C_T	10	103214584	C	T	8945	BTRC	+	intron			intronic	BTRC	.	.	.	.	.	.	.	.	.	.	.	.	.	.	.	.	.	.	SSC	13590.s1	13590	simplex	13590.f1	13590.m1	male	.	468	436
251	12032.p1||10_103219225_A_G	genome	NDD	autism	10_103219225_A_G	10	103219225	A	G	8945	BTRC	+	intron			intronic	BTRC	.	.	.	.	.	.	.	.	.	.	.	.	.	.	.	.	.	.	SSC	12032.p1	12032	simplex	12032.f1	12032.m1	male	71	368	317
252	AU3906301||10_103233648_C_T	genome	NDD	autism	10_103233648_C_T	10	103233648	C	T	8945	BTRC	+	intron	SINE	1	intronic	BTRC	.	.	.	.	.	.	.	.	.	.	.	.	.	.	.	.	.	.	Yuen2017	AU3906301	FAM_AU3906303	MPX	AU3906201	AU3906202	F		NA	NA
253	13136.s1||10_103233818_A_G	genome	control	control	10_103233818_A_G	10	103233818	A	G	8945	BTRC	+	intron	LINE	1	intronic	BTRC	.	.	.	.	.	.	.	.	.	.	.	.	.	.	.	.	.	.	SSC	13136.s1	13136	simplex	13136.f1	13136.m1	female	.	405	334
254	11312.p1||10_103235952_T_C	genome	NDD	autism	10_103235952_T_C	10	103235952	T	C	8945	BTRC	+	intron	LINE	1	intronic	BTRC	.	.	.	.	.	.	.	.	.	.	.	.	.	.	.	.	.	.	SSC	11312.p1	11312	simplex	11312.f1	11312.m1	male	109	390	424
255	14452.p1||10_103253323_C_T	genome	NDD	autism	10_103253323_C_T	10	103253323	C	T	8945	BTRC	+	intron			intronic	BTRC	.	.	.	.	.	.	.	.	.	.	.	.	.	.	.	.	.	.	Turner_2017;SSC	14452.p1	;14452	;simplex	;14452.f1	;14452.m1	;male	;114	NA;376	NA;360
256	gonl-203c||10_103264306_C_G	genome	control	control	10_103264306_C_G	10	103264306	C	G	8945	BTRC	+	intron			intronic	BTRC	.	.	.	.	.	.	.	.	.	.	.	.	.	.	.	.	.	.	GONL	gonl-203c							NA	NA
257	12152.s1||10_103273686_T_G	genome	control	control	10_103273686_T_G	10	103273686	T	G	8945	BTRC	+	intron	LINE	1	intronic	BTRC	.	.	.	.	.	.	.	.	.	.	.	.	.	.	.	.	.	.	SSC	12152.s1	12152	simplex	12152.f1	12152.m1	male	.	477	427
258	1-0052-004||10_103277545_C_T	genome	NDD	autism	10_103277545_C_T	10	103277545	C	T	8945	BTRC	+	intron	LINE	1	intronic	BTRC	.	.	.	.	.	.	.	.	.	.	.	.	.	.	.	.	.	.	Yuen2017	1-0052-004	FAM_1-0052-004	MPX	1-0052-002	1-0052-001	M		NA	NA
259	AU4483301||10_103297517_A_G	genome	NDD	autism	10_103297517_A_G	10	103297517	A	G	8945	BTRC	+	intron			intronic	BTRC	.	.	.	.	.	.	.	.	.	.	.	.	.	.	.	.	.	.	Yuen2017	AU4483301	FAM_AU4483301	SPX	AU4483201	AU4483202	M		NA	NA
260	13007.s1||10_103299279_A_G	genome	control	control	10_103299279_A_G	10	103299279	A	G	8945	BTRC	+	intron	LINE	1	intronic	BTRC	.	.	.	.	.	.	.	.	.	.	.	.	.	.	.	.	.	.	SSC	13007.s1	13007	simplex	13007.f1	13007.m1	female	.	390	434
261	11496.p1||10_103302068_A_G	genome	NDD	autism	10_103302068_A_G	10	103302068	A	G	8945	BTRC	+	intron	LINE	1	intronic	BTRC	.	.	.	.	.	.	.	.	.	.	.	.	.	.	.	.	.	.	SSC	11496.p1	11496	simplex	11496.f1	11496.m1	female	26	454	453
262	13336.p1||10_103356152_A_G	genome	NDD	autism	10_103356152_A_G	10	103356152	A	G	25911	DPCD	+	intron	SINE	1	intronic	DPCD	.	.	.	.	.	.	.	.	.	.	.	.	.	.	.	.	.	.	SSC	13336.p1	13336	simplex	13336.f1	13336.m1	male	91	435	427
263	AU3951302||10_103363149_C_A	genome	NDD	autism	10_103363149_C_A	10	103363149	C	A	25911	DPCD	+	intron	LTR	1	intronic	DPCD	.	.	.	.	.	.	.	.	.	.	.	.	.	.	.	.	.	.	Yuen2017	AU3951302	FAM_AU3951302	MPX	AU3951201	AU3951202	M		NA	NA
264	11599.s1||10_103376548_G_A	genome	control	control	10_103376548_G_A	10	103376548	G	A	6468	FBXW4	-	intron			intronic	FBXW4	.	.	.	.	.	.	.	.	.	.	.	.	.	.	.	.	.	.	SSC	11599.s1	11599	simplex	11599.f1	11599.m1	male	.	346	350
265	12524.p1||10_103388782_C_T	genome	NDD	autism	10_103388782_C_T	10	103388782	C	T	6468	FBXW4	-	intron			intronic	FBXW4	.	.	.	.	.	.	.	.	.	.	.	.	.	.	.	.	.	.	SSC	12524.p1	12524	simplex	12524.f1	12524.m1	female	130	368	333
266	14541.s1||10_103418987_G_C	genome	control	control	10_103418987_G_C	10	103418987	G	C	6468	FBXW4	-	intron			intronic	FBXW4	.	.	.	.	.	.	.	.	.	.	.	.	.	.	.	.	.	.	SSC	14541.s1	14541	simplex	14541.f1	14541.m1	female	.	355	303
267	13152.s1||10_103435993_C_T	genome	control	control	10_103435993_C_T	10	103435993	C	T	6468	FBXW4	-	intron			intronic	FBXW4	.	.	.	.	.	.	.	.	.	.	.	.	.	.	.	.	.	.	SSC	13152.s1	13152	simplex	13152.f1	13152.m1	female	.	362	354
268	2-1352-003||10_103443205_A_G	genome	NDD	autism	10_103443205_A_G	10	103443205	A	G	6468	FBXW4	-	intron			intronic	FBXW4	.	.	.	.	.	.	.	.	.	.	.	.	.	.	.	.	.	.	Yuen2016	2-1352-003	FAM_2-1352-003	SPX	2-1352-002	2-1352-001	M		NA	NA
269	14400.s1||10_103446470_A_G	genome	control	control	10_103446470_A_G	10	103446470	A	G	6468	FBXW4	-	intron			intronic	FBXW4	.	.	.	.	.	.	.	.	.	.	.	.	.	.	.	.	.	.	SSC	14400.s1	14400	simplex	14400.f1	14400.m1	male	.	444	310
270	14039.s1||10_103544807_A_C	genome	control	control	10_103544807_A_C	10	103544807	A	C	10724	MGEA5	-	3'UTR			UTR3	MGEA5	NM_012215:c.*1401T>G;NM_001142434:c.*1401T>G	.	.	.	.	.	.	.	.	.	.	.	.	.	.	.	.	.	SSC	14039.s1	14039	simplex	14039.f1	14039.m1	female	.	406	395
271	12773.p1||10_103545573_C_T	genome	NDD	autism	10_103545573_C_T	10	103545573	C	T	10724	MGEA5	-	3'UTR			UTR3	MGEA5	NM_012215:c.*635G>A;NM_001142434:c.*635G>A	.	.	.	.	.	.	.	.	.	.	.	.	.	.	.	.	.	SSC	12773.p1	12773	simplex	12773.f1	12773.m1	male	102	396	381
272	13626.s1||10_103546087_T_C	genome	control	control	10_103546087_T_C	10	103546087	T	C	10724	MGEA5	-	3'UTR			UTR3	MGEA5	NM_012215:c.*121A>G;NM_001142434:c.*121A>G	.	.	.	.	.	.	.	.	.	.	.	.	.	.	.	.	.	SSC	13626.s1	13626	simplex	13626.f1	13626.m1	male	.	365	382
273	13946.s1||10_103554539_T_C	genome	control	control	10_103554539_T_C	10	103554539	T	C	10724	MGEA5	-	intron			intronic	MGEA5	.	.	.	.	.	.	.	.	.	.	.	.	.	.	.	.	.	.	SSC	13946.s1	13946	simplex	13946.f1	13946.m1	female	.	473	375
274	2-1308-003||10_103557455_A_G	genome	NDD	autism	10_103557455_A_G	10	103557455	A	G	10724	MGEA5	-	3'UTR			intronic	MGEA5	.	.	.	.	.	.	.	.	.	.	.	.	.	.	.	.	.	.	Yuen2016	2-1308-003	FAM_2-1308-003	SPX	2-1308-002	2-1308-001	M		NA	NA
275	11366.p1||10_103557857_T_A	genome	NDD	autism	10_103557857_T_A	10	103557857	T	A	10724	MGEA5	-	CDS			exonic	MGEA5	.	nonsynonymous SNV	MGEA5:NM_001142434:exon9:c.A1705T:p.M569L,MGEA5:NM_012215:exon10:c.A1864T:p.M622L	T	B	B	D	D	L	T	N	T	T	T	D	12.05	1.061	0.998	SSC	11366.p1	11366	simplex	11366.f1	11366.m1	male	40	436	354
276	13018.s1||10_103557989_G_A	genome	control	control	10_103557989_G_A	10	103557989	G	A	10724	MGEA5	-	intron			intronic	MGEA5	.	.	.	.	.	.	.	.	.	.	.	.	.	.	.	.	.	.	SSC	13018.s1	13018	simplex	13018.f1	13018.m1	male	.	472	367
277	14680.s1||10_103564718_T_C	genome	control	control	10_103564718_T_C	10	103564718	T	C	10724	MGEA5	-	intron			intronic	MGEA5	.	.	.	.	.	.	.	.	.	.	.	.	.	.	.	.	.	.	SSC	14680.s1	14680	simplex	14680.f1	14680.m1	female	.	433	410
278	11942.p1||10_103564734_C_T	genome	NDD	autism	10_103564734_C_T	10	103564734	C	T	10724	MGEA5	-	intron			intronic	MGEA5	.	.	.	.	.	.	.	.	.	.	.	.	.	.	.	.	.	.	Turner_2017;SSC	11942.p1	;11942	;simplex	;11942.f1	;11942.m1	;male	;44	NA;476	NA;425
279	11592.p1||10_103564913_C_T	genome	NDD	autism	10_103564913_C_T	10	103564913	C	T	10724	MGEA5	-	intron	SINE	1	intronic	MGEA5	.	.	.	.	.	.	.	.	.	.	.	.	.	.	.	.	.	.	SSC	11592.p1	11592	simplex	11592.f1	11592.m1	male	109	339	368
280	14163.p1||10_103576269_G_C	genome	NDD	autism	10_103576269_G_C	10	103576269	G	C	10724	MGEA5	-	intron			intronic	MGEA5	.	.	.	.	.	.	.	.	.	.	.	.	.	.	.	.	.	.	SSC	14163.p1	14163	simplex	14163.f1	14163.m1	male	78	499	473
281	14163.p1||10_103576270_C_T	genome	NDD	autism	10_103576270_C_T	10	103576270	C	T	10724	MGEA5	-	intron			intronic	MGEA5	.	.	.	.	.	.	.	.	.	.	.	.	.	.	.	.	.	.	SSC	14163.p1	14163	simplex	14163.f1	14163.m1	male	78	499	473
282	11590.s1||10_103588981_C_T	genome	control	control	10_103588981_C_T	10	103588981	C	T	30819	KCNIP2	-	intron			intronic	KCNIP2	.	.	.	.	.	.	.	.	.	.	.	.	.	.	.	.	.	.	Turner_2017;SSC	11590.s1	;11590	;simplex	;11590.f1	;11590.m1	;female	;.	NA;326	NA;337
283	2-1363-003||10_103591981_T_A	genome	NDD	autism	10_103591981_T_A	10	103591981	T	A	30819	KCNIP2	-	intron			intronic	KCNIP2	.	.	.	.	.	.	.	.	.	.	.	.	.	.	.	.	.	.	Yuen2016	2-1363-003	FAM_2-1363-003	SPX	2-1363-002	2-1363-001	M		NA	NA
284	gonl-170c||10_103592397_C_G	genome	control	control	10_103592397_C_G	10	103592397	C	G	30819	KCNIP2	-	intron			intronic	KCNIP2	.	.	.	.	.	.	.	.	.	.	.	.	.	.	.	.	.	.	GONL	gonl-170c							NA	NA
285	01C06311|01C06312||10_103608373_C_T	genome	NDD	autism	10_103608373_C_T	10	103608373	C	T	79591	C10orf76	-	intron			intronic	C10orf76	.	.	.	.	.	.	.	.	.	.	.	.	.	.	.	.	.	.	Michaelson2012	01C06311|01C06312							NA	NA
286	2-1644-004||10_103612251_G_A	genome	NDD	autism	10_103612251_G_A	10	103612251	G	A	79591	C10orf76	-	intron	SINE	1	intronic	C10orf76	.	.	.	.	.	.	.	.	.	.	.	.	.	.	.	.	.	.	Yuen2017	2-1644-004	FAM_2-1644-004	MPX	2-1644-002	2-1644-001	M		NA	NA
287	14649.p1||10_103626551_G_A	genome	NDD	autism	10_103626551_G_A	10	103626551	G	A	79591	C10orf76	-	intron	DNA	1	intronic	C10orf76	.	.	.	.	.	.	.	.	.	.	.	.	.	.	.	.	.	.	SSC	14649.p1	14649	simplex	14649.f1	14649.m1	male	94	397	400
288	1-0467-005||10_103645763_A_G	genome	NDD	autism	10_103645763_A_G	10	103645763	A	G	79591	C10orf76	-	intron	SINE	1	intronic	C10orf76	.	.	.	.	.	.	.	.	.	.	.	.	.	.	.	.	.	.	Yuen2017	1-0467-005	FAM_1-0467-005	MPX	1-0467-002	1-0467-001	M		NA	NA
289	1-0467-005||10_103646018_G_C	genome	NDD	autism	10_103646018_G_C	10	103646018	G	C	79591	C10orf76	-	intron	SINE	1	intronic	C10orf76	.	.	.	.	.	.	.	.	.	.	.	.	.	.	.	.	.	.	Yuen2017	1-0467-005	FAM_1-0467-005	MPX	1-0467-002	1-0467-001	M		NA	NA
290	2-1485-003|2-1485-004||10_103646018_G_C	genome	NDD	autism	10_103646018_G_C	10	103646018	G	C	79591	C10orf76	-	intron	SINE	1	intronic	C10orf76	.	.	.	.	.	.	.	.	.	.	.	.	.	.	.	.	.	.	Yuen2017	2-1485-003|2-1485-004	FAM_2-1485-004	MPX	2-1485-002	2-1485-001	F		NA	NA
291	1-0138-004||10_103646181_C_G	genome	NDD	autism	10_103646181_C_G	10	103646181	C	G	79591	C10orf76	-	intron	SINE	1	intronic	C10orf76	.	.	.	.	.	.	.	.	.	.	.	.	.	.	.	.	.	.	Yuen2017	1-0138-004	FAM_1-0138-004	MPX	1-0138-002	1-0138-001	M		NA	NA
292	1-0219-003||10_103646181_C_G	genome	NDD	autism	10_103646181_C_G	10	103646181	C	G	79591	C10orf76	-	intron	SINE	1	intronic	C10orf76	.	.	.	.	.	.	.	.	.	.	.	.	.	.	.	.	.	.	Yuen2017	1-0219-003	FAM_1-0219-003	SPX	1-0219-002	1-0219-001	M		NA	NA
293	2-1297-004||10_103646245_T_C	genome	NDD	autism	10_103646245_T_C	10	103646245	T	C	79591	C10orf76	-	intron	SINE	1	intronic	C10orf76	.	.	.	.	.	.	.	.	.	.	.	.	.	.	.	.	.	.	Yuen2017	2-1297-004	FAM_2-1297-004	MPX	2-1297-002	2-1297-001	M		NA	NA
294	5-0003-004||10_103646245_T_C	genome	NDD	autism	10_103646245_T_C	10	103646245	T	C	79591	C10orf76	-	intron	SINE	1	intronic	C10orf76	.	.	.	.	.	.	.	.	.	.	.	.	.	.	.	.	.	.	Yuen2017	5-0003-004	FAM_5-0003-004	MPX	5-0003-002	5-0003-001	M		NA	NA
295	2-0310-003||10_103646253_T_C	genome	NDD	autism	10_103646253_T_C	10	103646253	T	C	79591	C10orf76	-	intron	SINE	1	intronic	C10orf76	.	.	.	.	.	.	.	.	.	.	.	.	.	.	.	.	.	.	Yuen2017	2-0310-003	FAM_2-0310-005	MPX	2-0310-002	2-0310-001	M		NA	NA
296	1-0139-003||10_103646261_T_C	genome	NDD	autism	10_103646261_T_C	10	103646261	T	C	79591	C10orf76	-	intron	SINE	1	intronic	C10orf76	.	.	.	.	.	.	.	.	.	.	.	.	.	.	.	.	.	.	Yuen2017	1-0139-003	FAM_1-0139-005	MPX	1-0139-002	1-0139-001	F		NA	NA
297	1-0534-004||10_103646261_T_C	genome	NDD	autism	10_103646261_T_C	10	103646261	T	C	79591	C10orf76	-	intron	SINE	1	intronic	C10orf76	.	.	.	.	.	.	.	.	.	.	.	.	.	.	.	.	.	.	Yuen2017	1-0534-004	FAM_1-0534-006	MPX	1-0534-002	1-0534-001	M		NA	NA
298	14511.p1||10_103648009_C_G	genome	NDD	autism	10_103648009_C_G	10	103648009	C	G	79591	C10orf76	-	intron			intronic	C10orf76	.	.	.	.	.	.	.	.	.	.	.	.	.	.	.	.	.	.	Turner_2017;SSC	14511.p1	;14511	;simplex	;14511.f1	;14511.m1	;male	;98	NA;263	NA;242
299	11729.s1||10_103652678_C_T	genome	control	control	10_103652678_C_T	10	103652678	C	T	79591	C10orf76	-	intron			intronic	C10orf76	.	.	.	.	.	.	.	.	.	.	.	.	.	.	.	.	.	.	Turner_2017;SSC	11729.s1	;11729	;simplex	;11729.f1	;11729.m1	;female	;.	NA;386	NA;375
300	13981.s1||10_103670046_A_G	genome	control	control	10_103670046_A_G	10	103670046	A	G	79591	C10orf76	-	intron			intronic	C10orf76	.	.	.	.	.	.	.	.	.	.	.	.	.	.	.	.	.	.	SSC	13981.s1	13981	simplex	13981.f1	13981.m1	female	.	385	369
301	11341.s1||10_103674203_C_G	genome	control	control	10_103674203_C_G	10	103674203	C	G	79591	C10orf76	-	intron	SINE	1	intronic	C10orf76	.	.	.	.	.	.	.	.	.	.	.	.	.	.	.	.	.	.	Turner2016	11341.s1							NA	NA
302	13517.p1||10_103674950_G_C	genome	NDD	autism	10_103674950_G_C	10	103674950	G	C	79591	C10orf76	-	intron			intronic	C10orf76	.	.	.	.	.	.	.	.	.	.	.	.	.	.	.	.	.	.	SSC	13517.p1	13517	simplex	13517.f1	13517.m1	male	51	352	376
303	1-0551-003||10_103681598_A_G	genome	NDD	autism	10_103681598_A_G	10	103681598	A	G	79591	C10orf76	-	intron	LINE	1	intronic	C10orf76	.	.	.	.	.	.	.	.	.	.	.	.	.	.	.	.	.	.	Yuen2017	1-0551-003	FAM_1-0551-004	MPX	1-0551-002	1-0551-001	M		NA	NA
304	2-1451-004||10_1036921_G_T	genome	NDD	autism	10_1036921_G_T	10	1036921	G	T	23560	GTPBP4	+	intron	LINE	1	intronic	GTPBP4	.	.	.	.	.	.	.	.	.	.	.	.	.	.	.	.	.	.	Yuen2017	2-1451-004	FAM_2-1451-004	MPX	2-1451-002	2-1451-001	M		NA	NA
305	AU2075302||10_103703637_C_T	genome	NDD	autism	10_103703637_C_T	10	103703637	C	T	79591	C10orf76	-	intron	SINE	1	intronic	C10orf76	.	.	.	.	.	.	.	.	.	.	.	.	.	.	.	.	.	.	Yuen2017	AU2075302	FAM_AU2075302	MPX	AU2075201	AU2075202	M		NA	NA
306	12201.s1||10_103705465_G_A	genome	control	control	10_103705465_G_A	10	103705465	G	A	79591	C10orf76	-	intron	SINE	1	intronic	C10orf76	.	.	.	.	.	.	.	.	.	.	.	.	.	.	.	.	.	.	SSC	12201.s1	12201	simplex	12201.f1	12201.m1	male	.	374	336
307	AU1404302||10_103719228_C_T	genome	NDD	autism	10_103719228_C_T	10	103719228	C	T	79591	C10orf76	-	intron			intronic	C10orf76	.	.	.	.	.	.	.	.	.	.	.	.	.	.	.	.	.	.	Yuen2017	AU1404302	FAM_AU1404302	MPX	AU1404201	AU1404202	M		NA	NA
308	1-0286-004||10_103726758_A_G	genome	NDD	autism	10_103726758_A_G	10	103726758	A	G	79591	C10orf76	-	intron			intronic	C10orf76	.	.	.	.	.	.	.	.	.	.	.	.	.	.	.	.	.	.	Yuen2017	1-0286-004	FAM_1-0286-004	MPX	1-0286-002	1-0286-001	F		NA	NA
309	2-1366-004||10_103735851_A_G	genome	NDD	autism	10_103735851_A_G	10	103735851	A	G	79591	C10orf76	-	intron	SINE	1	intronic	C10orf76	.	.	.	.	.	.	.	.	.	.	.	.	.	.	.	.	.	.	Yuen2017	2-1366-004	FAM_2-1366-004	MPX	2-1366-002	2-1366-001	F		NA	NA
310	12175.p1||10_103740999_C_A	genome	NDD	autism	10_103740999_C_A	10	103740999	C	A	79591	C10orf76	-	intron			intronic	C10orf76	.	.	.	.	.	.	.	.	.	.	.	.	.	.	.	.	.	.	SSC	12175.p1	12175	simplex	12175.f1	12175.m1	male	73	573	404
311	13822.p1||10_103746760_G_A	genome	NDD	autism	10_103746760_G_A	10	103746760	G	A	79591	C10orf76	-	intron			intronic	C10orf76	.	.	.	.	.	.	.	.	.	.	.	.	.	.	.	.	.	.	SSC	13822.p1	13822	simplex	13822.f1	13822.m1	male	27	397	421
312	gonl-30c||10_103763336_A_G	genome	control	control	10_103763336_A_G	10	103763336	A	G	79591	C10orf76	-	intron			intronic	C10orf76	.	.	.	.	.	.	.	.	.	.	.	.	.	.	.	.	.	.	GONL	gonl-30c							NA	NA
313	22044.p1||10_103763428_G_A	genome	NDD	autism	10_103763428_G_A	10	103763428	G	A	79591	C10orf76	-	intron			intronic	C10orf76	.	.	.	.	.	.	.	.	.	.	.	.	.	.	.	.	.	.	SSC	22044.p1	KOR-044	simplex	KOR-044.f1	KOR-044.m1	male		NA	NA
314	13532.p1||10_103791541_G_A	genome	NDD	autism	10_103791541_G_A	10	103791541	G	A	79591	C10orf76	-	intron	SINE	1	intronic	C10orf76	.	.	.	.	.	.	.	.	.	.	.	.	.	.	.	.	.	.	Turner_2017;SSC	13532.p1	;13532	;simplex	;13532.f1	;13532.m1	;male	;46	NA;442	NA;434
315	12719.p1||10_103794389_T_C	genome	NDD	autism	10_103794389_T_C	10	103794389	T	C	79591	C10orf76	-	intron	SINE	1	intronic	C10orf76	.	.	.	.	.	.	.	.	.	.	.	.	.	.	.	.	.	.	SSC	12719.p1	12719	simplex	12719.f1	12719.m1	male	51	477	441
316	AU3680302||10_103801148_G_A	genome	NDD	autism	10_103801148_G_A	10	103801148	G	A	79591	C10orf76	-	intron			intronic	C10orf76	.	.	.	.	.	.	.	.	.	.	.	.	.	.	.	.	.	.	Yuen2017	AU3680302	FAM_AU3680302	MPX	AU3680201	AU3680202	M		NA	NA
317	13162.p1||10_103801426_G_T	genome	NDD	autism	10_103801426_G_T	10	103801426	G	T	79591	C10orf76	-	intron	SINE	1	intronic	C10orf76	.	.	.	.	.	.	.	.	.	.	.	.	.	.	.	.	.	.	SSC	13162.p1	13162	simplex	13162.f1	13162.m1	male	78	467	323
318	13972.p1||10_103802724_G_C	genome	NDD	autism	10_103802724_G_C	10	103802724	G	C	79591	C10orf76	-	intron	SINE	1	intronic	C10orf76	.	.	.	.	.	.	.	.	.	.	.	.	.	.	.	.	.	.	SSC	13972.p1	13972	simplex	13972.f1	13972.m1	male	71	397	346
319	11939.p1||10_103803276_T_C	genome	NDD	autism	10_103803276_T_C	10	103803276	T	C	79591	C10orf76	-	intron	LINE	1	intronic	C10orf76	.	.	.	.	.	.	.	.	.	.	.	.	.	.	.	.	.	.	Turner_2017;SSC	11939.p1	;11939	;simplex	;11939.f1	;11939.m1	;male	;91	NA;426	NA;412
320	14671.s1||10_103808869_T_C	genome	control	control	10_103808869_T_C	10	103808869	T	C	79591	C10orf76	-	intron			intronic	C10orf76	.	.	.	.	.	.	.	.	.	.	.	.	.	.	.	.	.	.	SSC	14671.s1	14671	simplex	14671.f1	14671.m1	female	.	478	392
321	AU2072302||10_103810029_C_T	genome	NDD	autism	10_103810029_C_T	10	103810029	C	T	79591	C10orf76	-	intron	SINE	1	intronic	C10orf76	.	.	.	.	.	.	.	.	.	.	.	.	.	.	.	.	.	.	Yuen2017	AU2072302	FAM_AU2072302	SPX	AU2072201	AU2072202	M		NA	NA
322	2-1738-003||10_103825375_C_A	genome	NDD	autism	10_103825375_C_A	10	103825375	C	A	79803	HPS6	+	CDS			exonic	HPS6	.	synonymous SNV	HPS6:NM_024747:exon1:c.C144A:p.P48P	.	.	.	.	.	.	.	.	.	.	.	.	.	.	.	Yuen2017	2-1738-003	FAM_2-1738-001	SPX	2-1738-002	2-1738-001	M		NA	NA
323	11788.p1||10_103897248_C_T	genome	NDD	autism	10_103897248_C_T	10	103897248	C	T	23082	PPRC1	+	intron			intronic	PPRC1	.	.	.	.	.	.	.	.	.	.	.	.	.	.	.	.	.	.	Turner_2017;SSC	11788.p1	;11788	;simplex	;11788.f1	;11788.m1	;male	;92	NA;372	NA;339
324	12605.p1||10_103908608_C_T	genome	NDD	autism	10_103908608_C_T	10	103908608	C	T	23082	PPRC1	+	CDS			exonic	PPRC1	.	nonsynonymous SNV	PPRC1:NM_001288727:exon10:c.C3860T:p.P1287L,PPRC1:NM_001288728:exon12:c.C4286T:p.P1429L,PPRC1:NM_015062:exon12:c.C4652T:p.P1551L	D	D	D	D	D	M	T	D	T	T	D	D	26.1	0.776	0.998	Turner_2017;SSC	12605.p1	;12605	;simplex	;12605.f1	;12605.m1	;male	;108	NA;500	NA;471
325	13850.s1||10_103908623_G_A	genome	control	control	10_103908623_G_A	10	103908623	G	A	23082	PPRC1	+	CDS			exonic	PPRC1	.	nonsynonymous SNV	PPRC1:NM_001288727:exon10:c.G3875A:p.R1292Q,PPRC1:NM_001288728:exon12:c.G4301A:p.R1434Q,PPRC1:NM_015062:exon12:c.G4667A:p.R1556Q	D	D	D	D	D	N	T	N	T	T	T	D	26.1	0.867	0.978	SSC	13850.s1	13850	simplex	13850.f1	13850.m1	male	.	364	368
326	AU070703||10_103912807_G_C	genome	NDD	autism	10_103912807_G_C	10	103912807	G	C	9221	NOLC1	+	intron			intronic	NOLC1	.	.	.	.	.	.	.	.	.	.	.	.	.	.	.	.	.	.	Yuen2017	AU070703	FAM_AU070703	MPX	AU070702	AU070701	M		NA	NA
327	3-0307-000||10_103915558_G_A	genome	NDD	autism	10_103915558_G_A	10	103915558	G	A	9221	NOLC1	+	intron	SINE	1	intronic	NOLC1	.	.	.	.	.	.	.	.	.	.	.	.	.	.	.	.	.	.	Yuen2017	3-0307-000	FAM_3-0307-101	SPX	3-0307-101	3-0307-100	M		NA	NA
328	12735.s1||10_103918324_C_G	genome	control	control	10_103918324_C_G	10	103918324	C	G	9221	NOLC1	+	intron			intronic	NOLC1	.	.	.	.	.	.	.	.	.	.	.	.	.	.	.	.	.	.	SSC	12735.s1	12735	simplex	12735.f1	12735.m1	male	.	462	401
329	13838.s1||10_103990692_G_A	genome	control	control	10_103990692_G_A	10	103990692	G	A	5309	PITX3	-	CDS			exonic	PITX3	.	nonsynonymous SNV	PITX3:NM_005029:exon4:c.C488T:p.P163L	D	B	B	D	D	N	D	D	T	T	D	D	24.2	0.803	0.991	SSC	13838.s1	13838	simplex	13838.f1	13838.m1	female	.	356	394
330	14088.s1||10_103999590_C_T	genome	control	control	10_103999590_C_T	10	103999590	C	T	5309	PITX3	-	intron			intronic	PITX3	.	.	.	.	.	.	.	.	.	.	.	.	.	.	.	.	.	.	SSC	14088.s1	14088	simplex	14088.f1	14088.m1	female	.	399	355
331	7-0254-004||10_104010132_T_C	genome	NDD	autism	10_104010132_T_C	10	104010132	T	C	8729	GBF1	+	intron	SINE	1	intronic	GBF1	.	.	.	.	.	.	.	.	.	.	.	.	.	.	.	.	.	.	Yuen2017	7-0254-004	FAM_7-0254-004	MPX	7-0254-002	7-0254-001	M		NA	NA
332	13335.p1||10_104010463_C_T	genome	NDD	autism	10_104010463_C_T	10	104010463	C	T	8729	GBF1	+	intron	SINE	1	intronic	GBF1	.	.	.	.	.	.	.	.	.	.	.	.	.	.	.	.	.	.	SSC	13335.p1	13335	simplex	13335.f1	13335.m1	female	25	542	502
333	AU4237304||10_104041844_C_T	genome	NDD	autism	10_104041844_C_T	10	104041844	C	T	8729	GBF1	+	intron	SINE	1	intronic	GBF1	.	.	.	.	.	.	.	.	.	.	.	.	.	.	.	.	.	.	Yuen2017	AU4237304	FAM_AU4237304	MPX	AU4237201	AU4237202	F		NA	NA
334	12656.s1||10_104042992_G_A	genome	control	control	10_104042992_G_A	10	104042992	G	A	8729	GBF1	+	intron			intronic	GBF1	.	.	.	.	.	.	.	.	.	.	.	.	.	.	.	.	.	.	SSC	12656.s1	12656	simplex	12656.f1	12656.m1	male	.	302	229
335	14464.p1||10_104049063_A_G	genome	NDD	autism	10_104049063_A_G	10	104049063	A	G	8729	GBF1	+	intron			intronic	GBF1	.	.	.	.	.	.	.	.	.	.	.	.	.	.	.	.	.	.	SSC	14464.p1	14464	simplex	14464.f1	14464.m1	female	40	323	317
336	gonl-221c||10_104072230_T_G	genome	control	control	10_104072230_T_G	10	104072230	T	G	8729	GBF1	+	intron			intronic	GBF1	.	.	.	.	.	.	.	.	.	.	.	.	.	.	.	.	.	.	GONL	gonl-221c							NA	NA
337	12493.p1||10_104080754_T_C	genome	NDD	autism	10_104080754_T_C	10	104080754	T	C	8729	GBF1	+	intron	SINE	1	intronic	GBF1	.	.	.	.	.	.	.	.	.	.	.	.	.	.	.	.	.	.	Turner_2017	12493.p1							NA	NA
338	AU2293301||10_104082053_G_A	genome	NDD	autism	10_104082053_G_A	10	104082053	G	A	8729	GBF1	+	intron	LINE	1	intronic	GBF1	.	.	.	.	.	.	.	.	.	.	.	.	.	.	.	.	.	.	Yuen2017	AU2293301	FAM_AU2293302	MPX	AU2293201	AU2293202	F		NA	NA
339	2-1239-003||10_104091869_C_T	genome	NDD	autism	10_104091869_C_T	10	104091869	C	T	8729	GBF1	+	intron	SINE	1	intronic	GBF1	.	.	.	.	.	.	.	.	.	.	.	.	.	.	.	.	.	.	Yuen2016	2-1239-003	FAM_2-1239-003	SPX	2-1239-002	2-1239-001	F		NA	NA
340	11498.s1||10_104092284_G_C	genome	control	control	10_104092284_G_C	10	104092284	G	C	8729	GBF1	+	intron	SINE	1	intronic	GBF1	.	.	.	.	.	.	.	.	.	.	.	.	.	.	.	.	.	.	SSC	11498.s1	11498	simplex	11498.f1	11498.m1	male	.	440	385
341	12271.p1||10_104098016_G_T	genome	NDD	autism	10_104098016_G_T	10	104098016	G	T	8729	GBF1	+	intron	SINE	1	intronic	GBF1	.	.	.	.	.	.	.	.	.	.	.	.	.	.	.	.	.	.	Turner_2017	12271.p1							NA	NA
342	11042.p1||10_104105201_A_G	genome	NDD	autism	10_104105201_A_G	10	104105201	A	G	8729	GBF1	+	intron	SINE	1	intronic	GBF1	.	.	.	.	.	.	.	.	.	.	.	.	.	.	.	.	.	.	SSC	11042.p1	11042	simplex	11042.f1	11042.m1	male	102	443	315
343	2-1365-003||10_104115728_G_A	genome	NDD	autism	10_104115728_G_A	10	104115728	G	A	8729	GBF1	+	intron			intronic	GBF1	.	.	.	.	.	.	.	.	.	.	.	.	.	.	.	.	.	.	Yuen2016	2-1365-003	FAM_2-1365-003	SPX	2-1365-002	2-1365-001	F		NA	NA
344	2-1594-003||10_104133080_C_G	genome	NDD	autism	10_104133080_C_G	10	104133080	C	G	8729	GBF1	+	intron	SINE	1	intronic	GBF1	.	.	.	.	.	.	.	.	.	.	.	.	.	.	.	.	.	.	Yuen2017	2-1594-003	FAM_2-1594-003	SPX	2-1594-002	2-1594-001	M		NA	NA
345	12111.s1||10_104134749_G_A	genome	control	control	10_104134749_G_A	10	104134749	G	A	8729	GBF1	+	intron	SINE	1	intronic	GBF1	.	.	.	.	.	.	.	.	.	.	.	.	.	.	.	.	.	.	SSC	12111.s1	12111	simplex	12111.f1	12111.m1	female	.	349	315
346	2-0007-003||10_104140360_C_T	genome	NDD	autism	10_104140360_C_T	10	104140360	C	T	8729	GBF1	+	CDS			exonic	GBF1	.	nonsynonymous SNV	GBF1:NM_001199378:exon38:c.C5078T:p.A1693V,GBF1:NM_001199379:exon38:c.C5075T:p.A1692V,GBF1:NM_004193:exon38:c.C5087T:p.A1696V	T	B	B	D	D	N	T	N	T	T	T	D	21.4	0.935	0.92	Yuen2017	2-0007-003	FAM_2-0007-004	MPX	2-0007-002	2-0007-001	M		NA	NA
347	11895.s1||10_104162806_C_T	genome	control	control	10_104162806_C_T	10	104162806	C	T	5662	PSD	-	3'UTR			UTR3	PSD	NM_001270966:c.*151G>A;NM_001270965:c.*151G>A;NM_002779:c.*151G>A	.	.	.	.	.	.	.	.	.	.	.	.	.	.	.	.	.	SSC	11895.s1	11895	simplex	11895.f1	11895.m1	male	.	549	484
348	11346.s1||10_104164171_C_T	genome	control	control	10_104164171_C_T	10	104164171	C	T	5662	PSD	-	intron	DNA	1	intronic	PSD	.	.	.	.	.	.	.	.	.	.	.	.	.	.	.	.	.	.	SSC	11346.s1	11346	simplex	11346.f1	11346.m1	male	.	415	410
349	12494.s1||10_104165274_G_A	genome	control	control	10_104165274_G_A	10	104165274	G	A	5662	PSD	-	CDS			exonic	PSD	.	nonsynonymous SNV	PSD:NM_002779:exon12:c.C2155T:p.R719C,PSD:NM_001270965:exon13:c.C2155T:p.R719C,PSD:NM_001270966:exon13:c.C1018T:p.R340C	D	D	P	N	D	L	T	D	T	T	T	D	34	0.877	1	SSC	12494.s1	12494	simplex	12494.f1	12494.m1	female	.	357	421
350	14604.p1||10_104165394_G_A	genome	NDD	autism	10_104165394_G_A	10	104165394	G	A	5662	PSD	-	intron			intronic	PSD	.	.	.	.	.	.	.	.	.	.	.	.	.	.	.	.	.	.	SSC	14604.p1	14604	simplex	14604.f1	14604.m1	male	64	384	368
351	13630.p1||10_104171132_G_A	genome	NDD	autism	10_104171132_G_A	10	104171132	G	A	5662	PSD	-	intron			intronic	PSD	.	.	.	.	.	.	.	.	.	.	.	.	.	.	.	.	.	.	SSC	13630.p1	13630	simplex	13630.f1	13630.m1	male	75	498	441
352	14263.p1||10_104213318_C_A	genome	NDD	autism	10_104213318_C_A	10	104213318	C	A	100505761	LOC100505761	+	intron	SINE	1	ncRNA_intronic	RPARP-AS1	.	.	.	.	.	.	.	.	.	.	.	.	.	.	.	.	.	.	SSC	14263.p1	14263	simplex	14263.f1	14263.m1	male	100	293	348
353	13001.p1||10_104242280_C_T	genome	NDD	autism	10_104242280_C_T	10	104242280	C	T	10121	ACTR1A	-	intron			intronic	ACTR1A	.	.	.	.	.	.	.	.	.	.	.	.	.	.	.	.	.	.	Turner_2017	13001.p1							NA	NA
354	13304.p1||10_104248236_G_A	genome	NDD	autism	10_104248236_G_A	10	104248236	G	A	10121	ACTR1A	-	intron			intronic	ACTR1A	.	.	.	.	.	.	.	.	.	.	.	.	.	.	.	.	.	.	Turner_2017;SSC	13304.p1	;13304	;simplex	;13304.f1	;13304.m1	;male	;61	NA;405	NA;332
355	14005.p1||10_104255657_C_T	genome	NDD	autism	10_104255657_C_T	10	104255657	C	T	10121	ACTR1A	-	intron	SINE	1	intronic	ACTR1A	.	.	.	.	.	.	.	.	.	.	.	.	.	.	.	.	.	.	Turner_2017	14005.p1							NA	NA
356	12763.p1||10_104263992_C_A	genome	NDD	autism	10_104263992_C_A	10	104263992	C	A	51684	SUFU	+	CDS			exonic	SUFU	.	stopgain	SUFU:NM_001178133:exon1:c.C83A:p.S28X,SUFU:NM_016169:exon1:c.C83A:p.S28X	.	.	.	D	A	.	.	.	.	.	.	D	36	0.781	0.982	SSC	12763.p1	12763	simplex	12763.f1	12763.m1	male	47	351	354
357	gonl-185c||10_104269863_G_A	genome	control	control	10_104269863_G_A	10	104269863	G	A	51684	SUFU	+	intron	SINE	1	intronic	SUFU	.	.	.	.	.	.	.	.	.	.	.	.	.	.	.	.	.	.	GONL	gonl-185c							NA	NA
358	13964.p1||10_104286837_G_A	genome	NDD	autism	10_104286837_G_A	10	104286837	G	A	51684	SUFU	+	intron	SINE	1	intronic	SUFU	.	.	.	.	.	.	.	.	.	.	.	.	.	.	.	.	.	.	Turner2016	13964.p1							NA	NA
359	AU060803||10_104294128_G_A	genome	NDD	autism	10_104294128_G_A	10	104294128	G	A	51684	SUFU	+	intron	SINE	1	intronic	SUFU	.	.	.	.	.	.	.	.	.	.	.	.	.	.	.	.	.	.	Yuen2017	AU060803	FAM_AU060803	MPX	AU060802	AU060801	M		NA	NA
360	12445.p1||10_104300245_C_T	genome	NDD	autism	10_104300245_C_T	10	104300245	C	T	51684	SUFU	+	intron	SINE	1	intronic	SUFU	.	.	.	.	.	.	.	.	.	.	.	.	.	.	.	.	.	.	Turner_2017	12445.p1							NA	NA
361	13913.s1||10_104300693_C_G	genome	control	control	10_104300693_C_G	10	104300693	C	G	51684	SUFU	+	intron	SINE	1	intronic	SUFU	.	.	.	.	.	.	.	.	.	.	.	.	.	.	.	.	.	.	SSC	13913.s1	13913	simplex	13913.f1	13913.m1	female	.	376	384
362	12695.p1||10_104302201_A_T	genome	NDD	autism	10_104302201_A_T	10	104302201	A	T	51684	SUFU	+	intron	SINE	1	intronic	SUFU	.	.	.	.	.	.	.	.	.	.	.	.	.	.	.	.	.	.	SSC	12695.p1	12695	simplex	12695.f1	12695.m1	male	56	283	318
363	1-0597-003||10_104310229_A_C	genome	NDD	autism	10_104310229_A_C	10	104310229	A	C	51684	SUFU	+	intron			intronic	SUFU	.	.	.	.	.	.	.	.	.	.	.	.	.	.	.	.	.	.	Yuen2017	1-0597-003	FAM_1-0597-003	SPX	1-0597-002	1-0597-001	F		NA	NA
364	14015.s1||10_104313365_C_T	genome	control	control	10_104313365_C_T	10	104313365	C	T	51684	SUFU	+	intron	SINE	1	intronic	SUFU	.	.	.	.	.	.	.	.	.	.	.	.	.	.	.	.	.	.	Turner_2017	14015.s1							NA	NA
365	14165.p1||10_104314465_C_T	genome	NDD	autism	10_104314465_C_T	10	104314465	C	T	51684	SUFU	+	intron			intronic	SUFU	.	.	.	.	.	.	.	.	.	.	.	.	.	.	.	.	.	.	SSC	14165.p1	14165	simplex	14165.f1	14165.m1	male	85	268	237
366	11671.p1||10_104340170_G_A	genome	NDD	autism	10_104340170_G_A	10	104340170	G	A	51684	SUFU	+	intron			intronic	SUFU	.	.	.	.	.	.	.	.	.	.	.	.	.	.	.	.	.	.	SSC	11671.p1	11671	simplex	11671.f1	11671.m1	male	85	426	330
367	2-0144-004||10_104341222_G_T	genome	NDD	autism	10_104341222_G_T	10	104341222	G	T	51684	SUFU	+	intron			intronic	SUFU	.	.	.	.	.	.	.	.	.	.	.	.	.	.	.	.	.	.	Yuen2017	2-0144-004	FAM_2-0144-004	MPX	2-0144-002	2-0144-001	F		NA	NA
368	11592.s1||10_104345749_C_G	genome	control	control	10_104345749_C_G	10	104345749	C	G	51684	SUFU	+	intron	SINE	1	intronic	SUFU	.	.	.	.	.	.	.	.	.	.	.	.	.	.	.	.	.	.	SSC	11592.s1	11592	simplex	11592.f1	11592.m1	female	.	363	392
369	2-1137-003||10_104351346_C_T	genome	NDD	autism	10_104351346_C_T	10	104351346	C	T	51684	SUFU	+	intron	snRNA	1	intronic	SUFU	.	.	.	.	.	.	.	.	.	.	.	.	.	.	.	.	.	.	Yuen2016	2-1137-003	FAM_2-1137-003	SPX	2-1137-002	2-1137-001	M		NA	NA
370	AU4264302||10_104352729_G_A	genome	NDD	autism	10_104352729_G_A	10	104352729	G	A	51684	SUFU	+	intron			intronic	SUFU	.	.	.	.	.	.	.	.	.	.	.	.	.	.	.	.	.	.	Yuen2017	AU4264302	FAM_AU4264302	SPX	AU4264201	AU4264202	M		NA	NA
371	gonl-240c||10_104373063_T_G	genome	control	control	10_104373063_T_G	10	104373063	T	G	51684	SUFU	+	intron			intronic	SUFU	.	.	.	.	.	.	.	.	.	.	.	.	.	.	.	.	.	.	GONL	gonl-240c							NA	NA
372	12529.s1||10_104382135_G_A	genome	control	control	10_104382135_G_A	10	104382135	G	A	51684	SUFU	+	intron	SINE	1	intronic	SUFU	.	.	.	.	.	.	.	.	.	.	.	.	.	.	.	.	.	.	Turner_2017;SSC	12529.s1	;12529	;simplex	;12529.f1	;12529.m1	;female	;.	NA;488	NA;404
373	12610.p1||10_104406771_T_C	genome	NDD	autism	10_104406771_T_C	10	104406771	T	C	81603	TRIM8	+	intron			intronic	TRIM8	.	.	.	.	.	.	.	.	.	.	.	.	.	.	.	.	.	.	SSC	12610.p1	12610	simplex	12610.f1	12610.m1	male	99	317	394
374	14458.s1||10_104433682_T_A	genome	control	control	10_104433682_T_A	10	104433682	T	A	403	ARL3	-	3'UTR			UTR3	ARL3	NM_004311:c.*2969A>T	.	.	.	.	.	.	.	.	.	.	.	.	.	.	.	.	.	Turner_2017;SSC	14458.s1	;14458	;simplex	;14458.f1	;14458.m1	;male	;.	NA;342	NA;296
375	14490.s1||10_104434152_C_T	genome	control	control	10_104434152_C_T	10	104434152	C	T	403	ARL3	-	3'UTR			UTR3	ARL3	NM_004311:c.*2499G>A	.	.	.	.	.	.	.	.	.	.	.	.	.	.	.	.	.	SSC	14490.s1	14490	simplex	14490.f1	14490.m1	female	.	361	323
376	13116.p1||10_104445847_G_T	genome	NDD	autism	10_104445847_G_T	10	104445847	G	T	403	ARL3	-	intron	SINE	1	intronic	ARL3	.	.	.	.	.	.	.	.	.	.	.	.	.	.	.	.	.	.	Turner_2017	13116.p1							NA	NA
377	13890.p1||10_1044498_C_T	genome	NDD	autism	10_1044498_C_T	10	1044498	C	T	23560	GTPBP4	+	intron	DNA	1	intronic	GTPBP4	.	.	.	.	.	.	.	.	.	.	.	.	.	.	.	.	.	.	SSC	13890.p1	13890	simplex	13890.f1	13890.m1	female	42	461	428
378	12274.p1||10_104452231_A_G	genome	NDD	autism	10_104452231_A_G	10	104452231	A	G	403	ARL3	-	intron	SINE	1	intronic	ARL3	.	.	.	.	.	.	.	.	.	.	.	.	.	.	.	.	.	.	SSC	12274.p1	12274	simplex	12274.f1	12274.m1	male	48	370	368
379	13580.s1||10_104457185_T_C	genome	control	control	10_104457185_T_C	10	104457185	T	C	403	ARL3	-	intron	SINE	1	intronic	ARL3	.	.	.	.	.	.	.	.	.	.	.	.	.	.	.	.	.	.	SSC	13580.s1	13580	simplex	13580.f1	13580.m1	female	.	458	439
380	13069.p1||10_104459799_C_T	genome	NDD	autism	10_104459799_C_T	10	104459799	C	T	403	ARL3	-	intron			intronic	ARL3	.	.	.	.	.	.	.	.	.	.	.	.	.	.	.	.	.	.	Turner_2017;SSC	13069.p1	;13069	;simplex	;13069.f1	;13069.m1	;male	;59	NA;522	NA;486
381	12187.p1||10_104460357_A_G	genome	NDD	autism	10_104460357_A_G	10	104460357	A	G	403	ARL3	-	intron	SINE	1	intronic	ARL3	.	.	.	.	.	.	.	.	.	.	.	.	.	.	.	.	.	.	Turner_2017	12187.p1							NA	NA
382	13564.p1||10_104461481_A_G	genome	NDD	autism	10_104461481_A_G	10	104461481	A	G	403	ARL3	-	intron	LINE	1	intronic	ARL3	.	.	.	.	.	.	.	.	.	.	.	.	.	.	.	.	.	.	Turner_2017	13564.p1							NA	NA
383	12888.s1||10_104478118_G_A	genome	control	control	10_104478118_G_A	10	104478118	G	A	118980	SFXN2	+	intron			intronic	SFXN2	.	.	.	.	.	.	.	.	.	.	.	.	.	.	.	.	.	.	SSC	12888.s1	12888	simplex	12888.f1	12888.m1	female	.	383	354
384	2-0022-004||10_104497506_A_C	genome	NDD	autism	10_104497506_A_C	10	104497506	A	C	118980	SFXN2	+	CDS			exonic	SFXN2	.	nonsynonymous SNV	SFXN2:NM_178858:exon12:c.A956C:p.N319T,SFXN2:NM_001350989:exon13:c.A956C:p.N319T	D	D	D	D	D	M	T	D	T	T	D	D	27	1.199	0.999	Yuen2017	2-0022-004	FAM_2-0022-005	MPX	2-0022-002	2-0022-001	M		NA	NA
385	12788.s1||10_104498354_C_T	genome	control	control	10_104498354_C_T	10	104498354	C	T	118980	SFXN2	+	3'UTR			UTR3	SFXN2	NM_178858:c.*835C>T;NM_001350989:c.*835C>T	.	.	.	.	.	.	.	.	.	.	.	.	.	.	.	.	.	Turner_2017;SSC	12788.s1	;12788	;simplex	;12788.f1	;12788.m1	;female	;.	NA;394	NA;365
386	2-1317-003||10_104520613_A_G	genome	NDD	autism	10_104520613_A_G	10	104520613	A	G	54838	WBP1L	+	intron	LINE	1	intronic	WBP1L	.	.	.	.	.	.	.	.	.	.	.	.	.	.	.	.	.	.	Yuen2016	2-1317-003	FAM_2-1317-003	SPX	2-1317-002	2-1317-001	M		NA	NA
387	1-0161-004||10_104527988_T_C	genome	NDD	autism	10_104527988_T_C	10	104527988	T	C	54838	WBP1L	+	intron	SINE	1	intronic	WBP1L	.	.	.	.	.	.	.	.	.	.	.	.	.	.	.	.	.	.	Yuen2017	1-0161-004	FAM_1-0161-004	MPX	1-0161-002	1-0161-001	M		NA	NA
388	14449.p1||10_104529918_G_C	genome	NDD	autism	10_104529918_G_C	10	104529918	G	C	54838	WBP1L	+	intron			intronic	WBP1L	.	.	.	.	.	.	.	.	.	.	.	.	.	.	.	.	.	.	SSC	14449.p1	14449	simplex	14449.f1	14449.m1	female	65	404	404
389	13606.p1||10_104539535_C_T	genome	NDD	autism	10_104539535_C_T	10	104539535	C	T	54838	WBP1L	+	intron	LINE	1	intronic	WBP1L	.	.	.	.	.	.	.	.	.	.	.	.	.	.	.	.	.	.	SSC	13606.p1	13606	simplex	13606.f1	13606.m1	male	60	330	313
390	1-0186-004||10_104546156_G_A	genome	NDD	autism	10_104546156_G_A	10	104546156	G	A	54838	WBP1L	+	intron			intronic	WBP1L	.	.	.	.	.	.	.	.	.	.	.	.	.	.	.	.	.	.	Yuen2017	1-0186-004	FAM_1-0186-005	MPX	1-0186-002	1-0186-001	M		NA	NA
391	11284.p1||10_104556218_A_G	genome	NDD	autism	10_104556218_A_G	10	104556218	A	G	54838	WBP1L	+	intron			intronic	WBP1L	.	.	.	.	.	.	.	.	.	.	.	.	.	.	.	.	.	.	SSC	11284.p1	11284	simplex	11284.f1	11284.m1	male	117	390	410
392	12671.s1||10_104572683_G_A	genome	control	control	10_104572683_G_A	10	104572683	G	A	54838	WBP1L	+	CDS			exonic	WBP1L	.	synonymous SNV	WBP1L:NM_001083913:exon4:c.G687A:p.P229P,WBP1L:NM_017787:exon4:c.G624A:p.P208P	.	.	.	.	.	.	.	.	.	.	.	.	.	.	.	SSC	12671.s1	12671	simplex	12671.f1	12671.m1	female	.	412	367
393	1-0346-004||10_104592864_C_T	genome	NDD	autism	10_104592864_C_T	10	104592864	C	T	1586	CYP17A1	-	CDS			exonic	CYP17A1	.	synonymous SNV	CYP17A1:NM_000102:exon5:c.G855A:p.E285E	.	.	.	.	.	.	.	.	.	.	.	.	.	.	.	Yuen2017	1-0346-004	FAM_1-0346-004	MPX	1-0346-002	1-0346-001	M		NA	NA
394	14385.s1||10_104593414_T_C	genome	control	control	10_104593414_T_C	10	104593414	T	C	1586	CYP17A1	-	intron	SINE	1	intronic	CYP17A1	.	.	.	.	.	.	.	.	.	.	.	.	.	.	.	.	.	.	SSC	14385.s1	14385	simplex	14385.f1	14385.m1	male	.	386	388
395	14594.s1||10_104629289_G_A	genome	control	control	10_104629289_G_A	10	104629289	G	A	100528007	C10orf32-AS3MT	+	5'UTR			ncRNA_intronic	BORCS7-ASMT	.	.	.	.	.	.	.	.	.	.	.	.	.	.	.	.	.	.	SSC	14594.s1	14594	simplex	14594.f1	14594.m1	female	.	343	329
396	14594.s1||10_104629290_C_T	genome	control	control	10_104629290_C_T	10	104629290	C	T	57412	AS3MT	+	5'UTR			ncRNA_intronic	BORCS7-ASMT	.	.	.	.	.	.	.	.	.	.	.	.	.	.	.	.	.	.	SSC	14594.s1	14594	simplex	14594.f1	14594.m1	female	.	343	329
397	13265.p1||10_104633053_A_T	genome	NDD	autism	10_104633053_A_T	10	104633053	A	T	57412	AS3MT	+	intron	Simple_repeat	1	ncRNA_intronic	BORCS7-ASMT	.	.	.	.	.	.	.	.	.	.	.	.	.	.	.	.	.	.	SSC	13265.p1	13265	simplex	13265.f1	13265.m1	male	45	439	390
398	12444.p1||10_104657412_G_A	genome	NDD	autism	10_104657412_G_A	10	104657412	G	A	100528007	C10orf32-AS3MT	+	intron	SINE	1	ncRNA_intronic	BORCS7-ASMT	.	.	.	.	.	.	.	.	.	.	.	.	.	.	.	.	.	.	SSC	12444.p1	12444	simplex	12444.f1	12444.m1	female	59	383	373
399	12494.s1||10_104698770_A_G	genome	control	control	10_104698770_A_G	10	104698770	A	G	54805	CNNM2	+	intron			intronic	CNNM2	.	.	.	.	.	.	.	.	.	.	.	.	.	.	.	.	.	.	SSC	12494.s1	12494	simplex	12494.f1	12494.m1	female	.	357	421
400	AU3636301||10_104703667_A_G	genome	NDD	autism	10_104703667_A_G	10	104703667	A	G	54805	CNNM2	+	intron			intronic	CNNM2	.	.	.	.	.	.	.	.	.	.	.	.	.	.	.	.	.	.	Yuen2017	AU3636301	FAM_AU3636302	MPX	AU3636201	AU3636202	M		NA	NA
401	12568.p1||10_104713586_G_A	genome	NDD	autism	10_104713586_G_A	10	104713586	G	A	54805	CNNM2	+	intron	SINE	1	intronic	CNNM2	.	.	.	.	.	.	.	.	.	.	.	.	.	.	.	.	.	.	Turner2016	12568.p1							NA	NA
402	AU4463303||10_104719204_T_A	genome	NDD	autism	10_104719204_T_A	10	104719204	T	A	54805	CNNM2	+	intron			intronic	CNNM2	.	.	.	.	.	.	.	.	.	.	.	.	.	.	.	.	.	.	Yuen2017	AU4463303	FAM_AU4463303	SPX	AU4463201	AU4463202	M		NA	NA
403	11615.s1||10_104732852_T_C	genome	control	control	10_104732852_T_C	10	104732852	T	C	54805	CNNM2	+	intron			intronic	CNNM2	.	.	.	.	.	.	.	.	.	.	.	.	.	.	.	.	.	.	Turner_2017;SSC	11615.s1	;11615	;simplex	;11615.f1	;11615.m1	;female	;.	NA;362	NA;367
404	AU3794302||10_104734755_C_A	genome	NDD	autism	10_104734755_C_A	10	104734755	C	A	54805	CNNM2	+	intron	LINE	1	intronic	CNNM2	.	.	.	.	.	.	.	.	.	.	.	.	.	.	.	.	.	.	Yuen2017	AU3794302	FAM_AU3794302	MPX	AU3794201	AU3794202	M		NA	NA
405	11818.s1||10_104750037_C_T	genome	control	control	10_104750037_C_T	10	104750037	C	T	54805	CNNM2	+	intron			intronic	CNNM2	.	.	.	.	.	.	.	.	.	.	.	.	.	.	.	.	.	.	Turner_2017;SSC	11818.s1	;11818	;simplex	;11818.f1	;11818.m1	;female	;.	NA;422	NA;374
406	13038.s1||10_104751781_A_G	genome	control	control	10_104751781_A_G	10	104751781	A	G	54805	CNNM2	+	intron			intronic	CNNM2	.	.	.	.	.	.	.	.	.	.	.	.	.	.	.	.	.	.	SSC	13038.s1	13038	simplex	13038.f1	13038.m1	male	.	382	380
407	gonl-140c||10_104759934_A_T	genome	control	control	10_104759934_A_T	10	104759934	A	T	54805	CNNM2	+	intron	SINE	1	intronic	CNNM2	.	.	.	.	.	.	.	.	.	.	.	.	.	.	.	.	.	.	GONL	gonl-140c							NA	NA
408	AU3053301||10_104767260_G_A	genome	NDD	autism	10_104767260_G_A	10	104767260	G	A	54805	CNNM2	+	intron	LTR	1	intronic	CNNM2	.	.	.	.	.	.	.	.	.	.	.	.	.	.	.	.	.	.	Yuen2017	AU3053301	FAM_AU3053302	MPX	AU3053201	AU3053202	F		NA	NA
409	11798.s1||10_104769315_G_A	genome	control	control	10_104769315_G_A	10	104769315	G	A	54805	CNNM2	+	intron	SINE	1	intronic	CNNM2	.	.	.	.	.	.	.	.	.	.	.	.	.	.	.	.	.	.	SSC	11798.s1	11798	simplex	11798.f1	11798.m1	female	.	372	369
410	12793.s1||10_104777037_G_A	genome	control	control	10_104777037_G_A	10	104777037	G	A	54805	CNNM2	+	intron			intronic	CNNM2	.	.	.	.	.	.	.	.	.	.	.	.	.	.	.	.	.	.	Turner_2017;SSC	12793.s1	;12793	;simplex	;12793.f1	;12793.m1	;female	;.	NA;443	NA;395
411	2-1461-003||10_104783695_G_A	genome	NDD	autism	10_104783695_G_A	10	104783695	G	A	54805	CNNM2	+	intron	LINE	1	intronic	CNNM2	.	.	.	.	.	.	.	.	.	.	.	.	.	.	.	.	.	.	Yuen2017	2-1461-003	FAM_2-1461-003	SPX	2-1461-002	2-1461-001	M		NA	NA
412	11336.p1||10_104784381_G_A	genome	NDD	autism	10_104784381_G_A	10	104784381	G	A	54805	CNNM2	+	intron	SINE	1	intronic	CNNM2	.	.	.	.	.	.	.	.	.	.	.	.	.	.	.	.	.	.	Turner_2017;SSC	11336.p1	;11336	;simplex	;11336.f1	;11336.m1	;male	;124	NA;398	NA;378
413	14125.s1||10_104799285_T_G	genome	control	control	10_104799285_T_G	10	104799285	T	G	54805	CNNM2	+	intron			intronic	CNNM2	.	.	.	.	.	.	.	.	.	.	.	.	.	.	.	.	.	.	SSC	14125.s1	14125	simplex	14125.f1	14125.m1	male	.	401	398
414	13892.s1||10_104799701_A_C	genome	control	control	10_104799701_A_C	10	104799701	A	C	54805	CNNM2	+	intron	SINE	1	intronic	CNNM2	.	.	.	.	.	.	.	.	.	.	.	.	.	.	.	.	.	.	Turner_2017;SSC	13892.s1	;13892	;simplex	;13892.f1	;13892.m1	;male	;.	NA;378	NA;355
415	gonl-193c||10_104803100_G_A	genome	control	control	10_104803100_G_A	10	104803100	G	A	54805	CNNM2	+	intron			intronic	CNNM2	.	.	.	.	.	.	.	.	.	.	.	.	.	.	.	.	.	.	GONL	gonl-193c							NA	NA
416	1-0299-003||10_104808249_A_G	genome	NDD	autism	10_104808249_A_G	10	104808249	A	G	54805	CNNM2	+	intron	SINE	1	intronic	CNNM2	.	.	.	.	.	.	.	.	.	.	.	.	.	.	.	.	.	.	Yuen2017	1-0299-003	FAM_1-0299-005	MPX	1-0299-002	1-0299-001	M		NA	NA
417	13556.p1||10_104810694_C_T	genome	NDD	autism	10_104810694_C_T	10	104810694	C	T	54805	CNNM2	+	intron			intronic	CNNM2	.	.	.	.	.	.	.	.	.	.	.	.	.	.	.	.	.	.	SSC	13556.p1	13556	simplex	13556.f1	13556.m1	male	102	471	358
418	12773.s1||10_104822480_T_A	genome	control	control	10_104822480_T_A	10	104822480	T	A	54805	CNNM2	+	intron			intronic	CNNM2	.	.	.	.	.	.	.	.	.	.	.	.	.	.	.	.	.	.	SSC	12773.s1	12773	simplex	12773.f1	12773.m1	male	.	354	339
419	12989.p1||10_104823421_G_A	genome	NDD	autism	10_104823421_G_A	10	104823421	G	A	54805	CNNM2	+	intron			intronic	CNNM2	.	.	.	.	.	.	.	.	.	.	.	.	.	.	.	.	.	.	Turner_2017;SSC	12989.p1	;12989	;simplex	;12989.f1	;12989.m1	;male	;83	NA;534	NA;411
420	11262.p1||10_104827514_A_G	genome	NDD	autism	10_104827514_A_G	10	104827514	A	G	54805	CNNM2	+	intron			intronic	CNNM2	.	.	.	.	.	.	.	.	.	.	.	.	.	.	.	.	.	.	Turner_2017;SSC	11262.p1	;11262	;simplex	;11262.f1	;11262.m1	;male	;85	NA;389	NA;382
421	1-0285-004||10_104831077_G_C	genome	NDD	autism	10_104831077_G_C	10	104831077	G	C	54805	CNNM2	+	intron			intronic	CNNM2	.	.	.	.	.	.	.	.	.	.	.	.	.	.	.	.	.	.	Yuen2017	1-0285-004	FAM_1-0285-004	MPX	1-0285-002	1-0285-001	F		NA	NA
422	12563.s1||10_104832731_C_T	genome	control	control	10_104832731_C_T	10	104832731	C	T	54805	CNNM2	+	intron	DNA	1	intronic	CNNM2	.	.	.	.	.	.	.	.	.	.	.	.	.	.	.	.	.	.	SSC	12563.s1	12563	simplex	12563.f1	12563.m1	male	.	384	264
423	3-0018-000||10_104836591_A_G	genome	NDD	autism	10_104836591_A_G	10	104836591	A	G	54805	CNNM2	+	intron			intronic	CNNM2	.	.	.	.	.	.	.	.	.	.	.	.	.	.	.	.	.	.	Yuen2017	3-0018-000	FAM_3-0018-101	SPX	3-0018-101	3-0018-100	M		NA	NA
424	14217.s1||10_104836960_A_G	genome	control	control	10_104836960_A_G	10	104836960	A	G	54805	CNNM2	+	3'UTR			UTR3	CNNM2	NM_017649:c.*23A>G;NM_199076:c.*23A>G	.	.	.	.	.	.	.	.	.	.	.	.	.	.	.	.	.	SSC	14217.s1	14217	simplex	14217.f1	14217.m1	male	.	331	304
425	14681.p1||10_104849892_A_G	genome	NDD	autism	10_104849892_A_G	10	104849892	A	G	22978	NT5C2	-	intron			intronic	NT5C2	.	.	.	.	.	.	.	.	.	.	.	.	.	.	.	.	.	.	Turner_2017;SSC	14681.p1	;14681	;simplex	;14681.f1	;14681.m1	;male	;53	NA;490	NA;430
426	11092.p1||10_104852474_A_G	genome	NDD	autism	10_104852474_A_G	10	104852474	A	G	22978	NT5C2	-	intron			intronic	NT5C2	.	.	.	.	.	.	.	.	.	.	.	.	.	.	.	.	.	.	SSC	11092.p1	11092	simplex	11092.f1	11092.m1	male	125	348	301
427	11135.p1||10_104864203_G_A	genome	NDD	autism	10_104864203_G_A	10	104864203	G	A	22978	NT5C2	-	intron			intronic	NT5C2	.	.	.	.	.	.	.	.	.	.	.	.	.	.	.	.	.	.	Turner_2017;SSC	11135.p1	;11135	;simplex	;11135.f1	;11135.m1	;male	;104	NA;349	NA;357
428	2-1235-004||10_104871314_T_C	genome	NDD	autism	10_104871314_T_C	10	104871314	T	C	22978	NT5C2	-	intron			intronic	NT5C2	.	.	.	.	.	.	.	.	.	.	.	.	.	.	.	.	.	.	Yuen2017	2-1235-004	FAM_2-1235-004	MPX	2-1235-002	2-1235-001	M		NA	NA
429	1-0862-003||10_104874019_C_T	genome	NDD	autism	10_104874019_C_T	10	104874019	C	T	22978	NT5C2	-	intron	SINE	1	intronic	NT5C2	.	.	.	.	.	.	.	.	.	.	.	.	.	.	.	.	.	.	Yuen2017	1-0862-003	FAM_1-0862-003	SPX	1-0862-002	1-0862-001	M		NA	NA
430	gonl-169c||10_104879686_T_C	genome	control	control	10_104879686_T_C	10	104879686	T	C	22978	NT5C2	-	intron	SINE	1	intronic	NT5C2	.	.	.	.	.	.	.	.	.	.	.	.	.	.	.	.	.	.	GONL	gonl-169c							NA	NA
431	14123.p1||10_104888240_A_G	genome	NDD	autism	10_104888240_A_G	10	104888240	A	G	22978	NT5C2	-	intron	Other	1	intronic	NT5C2	.	.	.	.	.	.	.	.	.	.	.	.	.	.	.	.	.	.	Turner_2017	14123.p1							NA	NA
432	11142.s1||10_104888334_T_G	genome	control	control	10_104888334_T_G	10	104888334	T	G	22978	NT5C2	-	intron	Other	1	intronic	NT5C2	.	.	.	.	.	.	.	.	.	.	.	.	.	.	.	.	.	.	Turner_2017	11142.s1							NA	NA
433	11905.p1||10_104890849_A_C	genome	NDD	autism	10_104890849_A_C	10	104890849	A	C	22978	NT5C2	-	intron			intronic	NT5C2	.	.	.	.	.	.	.	.	.	.	.	.	.	.	.	.	.	.	SSC	11905.p1	11905	simplex	11905.f1	11905.m1	male	71	456	432
434	14506.p1||10_104900448_C_T	genome	NDD	autism	10_104900448_C_T	10	104900448	C	T	22978	NT5C2	-	intron	LINE	1	intronic	NT5C2	.	.	.	.	.	.	.	.	.	.	.	.	.	.	.	.	.	.	SSC	14506.p1	14506	simplex	14506.f1	14506.m1	male	83	428	390
435	11159.p1||10_104913584_A_G	genome	NDD	autism	10_104913584_A_G	10	104913584	A	G	22978	NT5C2	-	intron			intronic	NT5C2	.	.	.	.	.	.	.	.	.	.	.	.	.	.	.	.	.	.	SSC	11159.p1	11159	simplex	11159.f1	11159.m1	male	109	323	327
436	11707.p1||10_104914301_T_A	genome	NDD	autism	10_104914301_T_A	10	104914301	T	A	22978	NT5C2	-	intron	SINE	1	intronic	NT5C2	.	.	.	.	.	.	.	.	.	.	.	.	.	.	.	.	.	.	SSC	11707.p1	11707	simplex	11707.f1	11707.m1	male	23	384	414
437	11492.s1||10_104915862_G_C	genome	control	control	10_104915862_G_C	10	104915862	G	C	22978	NT5C2	-	intron	SINE	1	intronic	NT5C2	.	.	.	.	.	.	.	.	.	.	.	.	.	.	.	.	.	.	SSC	11492.s1	11492	simplex	11492.f1	11492.m1	male	.	346	316
438	14540.s1||10_104916235_C_T	genome	control	control	10_104916235_C_T	10	104916235	C	T	22978	NT5C2	-	intron	SINE	1	intronic	NT5C2	.	.	.	.	.	.	.	.	.	.	.	.	.	.	.	.	.	.	SSC	14540.s1	14540	simplex	14540.f1	14540.m1	female	.	304	290
439	12438.s1||10_104923420_G_A	genome	control	control	10_104923420_G_A	10	104923420	G	A	22978	NT5C2	-	intron	LINE	1	intronic	NT5C2	.	.	.	.	.	.	.	.	.	.	.	.	.	.	.	.	.	.	SSC	12438.s1	12438	simplex	12438.f1	12438.m1	male	.	358	402
440	13858.s1||10_104938028_G_C	genome	control	control	10_104938028_G_C	10	104938028	G	C	22978	NT5C2	-	intron	SINE	1	intronic	NT5C2	.	.	.	.	.	.	.	.	.	.	.	.	.	.	.	.	.	.	Turner_2017;SSC	13858.s1	;13858	;simplex	;13858.f1	;13858.m1	;female	;.	NA;341	NA;318
441	13885.p1||10_104950462_A_C	genome	NDD	autism	10_104950462_A_C	10	104950462	A	C	22978	NT5C2	-	intron			intronic	NT5C2	.	.	.	.	.	.	.	.	.	.	.	.	.	.	.	.	.	.	SSC	13885.p1	13885	simplex	13885.f1	13885.m1	male	90	476	413
442	2-1335-004||10_105046529_C_G	genome	NDD	autism	10_105046529_C_G	10	105046529	C	G	9118	INA	+	intron			intronic	INA	.	.	.	.	.	.	.	.	.	.	.	.	.	.	.	.	.	.	Yuen2017	2-1335-004	FAM_2-1335-004	MPX	2-1335-002	2-1335-001	M		NA	NA
443	11212.s1||10_105084499_G_A	genome	control	control	10_105084499_G_A	10	105084499	G	A	84108	PCGF6	-	intron	SINE	1	intronic	PCGF6	.	.	.	.	.	.	.	.	.	.	.	.	.	.	.	.	.	.	Turner_2017	11212.s1							NA	NA
444	14415.s1||10_105084499_G_A	genome	control	control	10_105084499_G_A	10	105084499	G	A	84108	PCGF6	-	intron	SINE	1	intronic	PCGF6	.	.	.	.	.	.	.	.	.	.	.	.	.	.	.	.	.	.	Turner_2017	14415.s1							NA	NA
445	14291.p1||10_105084505_A_G	genome	NDD	autism	10_105084505_A_G	10	105084505	A	G	84108	PCGF6	-	intron	SINE	1	intronic	PCGF6	.	.	.	.	.	.	.	.	.	.	.	.	.	.	.	.	.	.	Turner_2017	14291.p1							NA	NA
446	11838.p1||10_105093533_T_C	genome	NDD	autism	10_105093533_T_C	10	105093533	T	C	84108	PCGF6	-	intron			intronic	PCGF6	.	.	.	.	.	.	.	.	.	.	.	.	.	.	.	.	.	.	SSC	11838.p1	11838	simplex	11838.f1	11838.m1	male	101	489	452
447	2-0149-005||10_105097628_C_T	genome	NDD	autism	10_105097628_C_T	10	105097628	C	T	84108	PCGF6	-	intron	SINE	1	intronic	PCGF6	.	.	.	.	.	.	.	.	.	.	.	.	.	.	.	.	.	.	Yuen2017	2-0149-005	FAM_2-0149-005	MPX	2-0149-002	2-0149-001	F		NA	NA
448	2-0272-003||10_105097628_C_T	genome	NDD	autism	10_105097628_C_T	10	105097628	C	T	84108	PCGF6	-	intron	SINE	1	intronic	PCGF6	.	.	.	.	.	.	.	.	.	.	.	.	.	.	.	.	.	.	Yuen2017	2-0272-003	FAM_2-0272-004	MPX	2-0272-002	2-0272-001	M		NA	NA
449	2-1644-003||10_105097628_C_T	genome	NDD	autism	10_105097628_C_T	10	105097628	C	T	84108	PCGF6	-	intron	SINE	1	intronic	PCGF6	.	.	.	.	.	.	.	.	.	.	.	.	.	.	.	.	.	.	Yuen2017	2-1644-003	FAM_2-1644-004	MPX	2-1644-002	2-1644-001	F		NA	NA
450	2-1644-004||10_105097628_C_T	genome	NDD	autism	10_105097628_C_T	10	105097628	C	T	84108	PCGF6	-	intron	SINE	1	intronic	PCGF6	.	.	.	.	.	.	.	.	.	.	.	.	.	.	.	.	.	.	Yuen2017	2-1644-004	FAM_2-1644-004	MPX	2-1644-002	2-1644-001	M		NA	NA
451	1-0186-004||10_105097657_T_A	genome	NDD	autism	10_105097657_T_A	10	105097657	T	A	84108	PCGF6	-	intron	SINE	1	intronic	PCGF6	.	.	.	.	.	.	.	.	.	.	.	.	.	.	.	.	.	.	Yuen2017	1-0186-004	FAM_1-0186-005	MPX	1-0186-002	1-0186-001	M		NA	NA
452	12568.s1||10_105099304_T_C	genome	control	control	10_105099304_T_C	10	105099304	T	C	84108	PCGF6	-	exon_unclassified	SINE	1	intronic	PCGF6	.	.	.	.	.	.	.	.	.	.	.	.	.	.	.	.	.	.	Turner2016	12568.s1							NA	NA
453	1-0763-003||10_105104956_A_T	genome	NDD	autism	10_105104956_A_T	10	105104956	A	T	84108	PCGF6	-	intron			intronic	PCGF6	.	.	.	.	.	.	.	.	.	.	.	.	.	.	.	.	.	.	Yuen2017	1-0763-003	FAM_1-0763-004	MPX	1-0763-002	1-0763-001	M		NA	NA
454	13815.s1||10_105131672_A_G	genome	control	control	10_105131672_A_G	10	105131672	A	G	6877	TAF5	+	intron			intronic	TAF5	.	.	.	.	.	.	.	.	.	.	.	.	.	.	.	.	.	.	SSC	13815.s1	13815	simplex	13815.f1	13815.m1	female	.	415	415
455	1-0452-003||10_105147781_T_A	genome	NDD	autism	10_105147781_T_A	10	105147781	T	A	6877	TAF5	+	CDS			exonic	TAF5	.	nonsynonymous SNV	TAF5:NM_139052:exon10:c.T2039A:p.V680D,TAF5:NM_006951:exon11:c.T2204A:p.V735D	D	D	D	D	D	H	T	D	D	D	D	D	29	1.056	1	Yuen2016	1-0452-003	FAM_1-0452-003	SPX	1-0452-002	1-0452-001	F		NA	NA
456	AU3636301||10_105148697_C_T	genome	NDD	autism	10_105148697_C_T	10	105148697	C	T	6877	TAF5	+	3'UTR			UTR3	TAF5	NM_139052:c.*717C>T;NM_006951:c.*717C>T	.	.	.	.	.	.	.	.	.	.	.	.	.	.	.	.	.	Yuen2017	AU3636301	FAM_AU3636302	MPX	AU3636201	AU3636202	M		NA	NA
457	AU2569301||10_105153416_G_A	genome	NDD	autism	10_105153416_G_A	10	105153416	G	A	84833	USMG5	-	intron	LINE	1	intronic	USMG5	.	.	.	.	.	.	.	.	.	.	.	.	.	.	.	.	.	.	Yuen2017	AU2569301	FAM_AU2569303	MPX	AU2569201	AU2569202	M		NA	NA
458	2-1355-004||10_105158109_T_A	genome	NDD	autism	10_105158109_T_A	10	105158109	T	A	22984	PDCD11	+	intron			intronic	PDCD11	.	.	.	.	.	.	.	.	.	.	.	.	.	.	.	.	.	.	Yuen2017	2-1355-004	FAM_2-1355-004	MPX	2-1355-002	2-1355-001	M		NA	NA
459	12325.s1||10_105162453_C_G	genome	control	control	10_105162453_C_G	10	105162453	C	G	22984	PDCD11	+	intron	SINE	1	intronic	PDCD11	.	.	.	.	.	.	.	.	.	.	.	.	.	.	.	.	.	.	SSC	12325.s1	12325	simplex	12325.f1	12325.m1	female	.	291	241
460	1-0359-003||10_105168393_G_A	genome	NDD	autism	10_105168393_G_A	10	105168393	G	A	22984	PDCD11	+	intron	SINE	1	intronic	PDCD11	.	.	.	.	.	.	.	.	.	.	.	.	.	.	.	.	.	.	Yuen2017	1-0359-003	FAM_1-0359-003	SPX	1-0359-002	1-0359-001	M		NA	NA
461	AU3154302||10_105168731_C_T	genome	NDD	autism	10_105168731_C_T	10	105168731	C	T	22984	PDCD11	+	intron	LINE	1	intronic	PDCD11	.	.	.	.	.	.	.	.	.	.	.	.	.	.	.	.	.	.	Yuen2017	AU3154302	FAM_AU3154302	MPX	AU3154201	AU3154202	M		NA	NA
462	11895.s1||10_105172405_A_G	genome	control	control	10_105172405_A_G	10	105172405	A	G	22984	PDCD11	+	intron	SINE	1	intronic	PDCD11	.	.	.	.	.	.	.	.	.	.	.	.	.	.	.	.	.	.	SSC	11895.s1	11895	simplex	11895.f1	11895.m1	male	.	549	484
463	13912.s1||10_105180911_G_A	genome	control	control	10_105180911_G_A	10	105180911	G	A	22984	PDCD11	+	intron	SINE	1	intronic	PDCD11	.	.	.	.	.	.	.	.	.	.	.	.	.	.	.	.	.	.	SSC	13912.s1	13912	simplex	13912.f1	13912.m1	female	.	401	396
464	14643.p1||10_105184868_G_A	genome	NDD	autism	10_105184868_G_A	10	105184868	G	A	22984	PDCD11	+	CDS			exonic	PDCD11	.	nonsynonymous SNV	PDCD11:NM_014976:exon20:c.G2891A:p.R964H	T	B	B	N	N	L	T	N	T	T	T	D	22.4	0.12	1	SSC	14643.p1	14643	simplex	14643.f1	14643.m1	female	28	407	394
465	14643.s1||10_105184868_G_A	genome	control	control	10_105184868_G_A	10	105184868	G	A	22984	PDCD11	+	CDS			exonic	PDCD11	.	nonsynonymous SNV	PDCD11:NM_014976:exon20:c.G2891A:p.R964H	T	B	B	N	N	L	T	N	T	T	T	D	22.4	0.12	1	SSC	14643.s1	14643	simplex	14643.f1	14643.m1	female	.	385	372
466	11257.p1||10_105192503_A_G	genome	NDD	autism	10_105192503_A_G	10	105192503	A	G	22984	PDCD11	+	intron			intronic	PDCD11	.	.	.	.	.	.	.	.	.	.	.	.	.	.	.	.	.	.	Turner_2017;SSC	11257.p1	;11257	;simplex	;11257.f1	;11257.m1	;male	;128	NA;424	NA;471
467	2-1635-004||10_105201953_T_G	genome	NDD	autism	10_105201953_T_G	10	105201953	T	G	22984	PDCD11	+	intron			intronic	PDCD11	.	.	.	.	.	.	.	.	.	.	.	.	.	.	.	.	.	.	Yuen2017	2-1635-004	FAM_2-1635-007	MPX	2-1635-007	2-1635-001	F		NA	NA
468	11199.p1||10_105211817_C_G	genome	NDD	autism	10_105211817_C_G	10	105211817	C	G	51063	CALHM2	-	intron			intronic	CALHM2	.	.	.	.	.	.	.	.	.	.	.	.	.	.	.	.	.	.	SSC	11199.p1	11199	simplex	11199.f1	11199.m1	male	94	490	406
469	13770.p1||10_105211986_G_C	genome	NDD	autism	10_105211986_G_C	10	105211986	G	C	51063	CALHM2	-	5'UTR			UTR5	CALHM2	NM_015916:c.-2288C>G	.	.	.	.	.	.	.	.	.	.	.	.	.	.	.	.	.	SSC	13770.p1	13770	simplex	13770.f1	13770.m1	female	93	362	381
470	12096.s1||10_105214771_C_G	genome	control	control	10_105214771_C_G	10	105214771	C	G	255022	CALHM1	-	3'UTR			UTR3	CALHM1	NM_001001412:c.*248G>C	.	.	.	.	.	.	.	.	.	.	.	.	.	.	.	.	.	SSC	12096.s1	12096	simplex	12096.f1	12096.m1	male	.	401	416
471	12787.s1||10_105233221_C_T	genome	control	control	10_105233221_C_T	10	105233221	C	T	119395	CALHM3	-	CDS			exonic	CALHM3	.	nonsynonymous SNV	CALHM3:NM_001129742:exon3:c.G784A:p.G262S	T	B	B	N	N	N	T	N	T	T	T	N	1.09	0.018	0.002	SSC	12787.s1	12787	simplex	12787.f1	12787.m1	female	.	439	374
472	14413.s1||10_105255561_A_G	genome	control	control	10_105255561_A_G	10	105255561	A	G	9148	NEURL	+	intron	LINE	1	ncRNA_intronic	NEURL1-AS1	.	.	.	.	.	.	.	.	.	.	.	.	.	.	.	.	.	.	SSC	14413.s1	14413	simplex	14413.f1	14413.m1	male	.	366	331
473	AU0146301||10_105257892_A_G	genome	NDD	autism	10_105257892_A_G	10	105257892	A	G	9148	NEURL	+	intron			ncRNA_intronic	NEURL1-AS1	.	.	.	.	.	.	.	.	.	.	.	.	.	.	.	.	.	.	Yuen2017	AU0146301	FAM_AU0146302	MPX	AU0146201	AU0146202	M		NA	NA
474	14582.p1||10_105267040_G_A	genome	NDD	autism	10_105267040_G_A	10	105267040	G	A	9148	NEURL	+	intron			ncRNA_intronic	NEURL1-AS1	.	.	.	.	.	.	.	.	.	.	.	.	.	.	.	.	.	.	SSC	14582.p1	14582	simplex	14582.f1	14582.m1	female	98	344	430
475	14058.s1||10_105267072_G_A	genome	control	control	10_105267072_G_A	10	105267072	G	A	9148	NEURL	+	intron	LINE	1	ncRNA_intronic	NEURL1-AS1	.	.	.	.	.	.	.	.	.	.	.	.	.	.	.	.	.	.	Turner_2017;SSC	14058.s1	;14058	;simplex	;14058.f1	;14058.m1	;female	;.	NA;488	NA;435
476	1-0736-003||10_105267386_C_A	genome	NDD	autism	10_105267386_C_A	10	105267386	C	A	9148	NEURL	+	intron			ncRNA_intronic	NEURL1-AS1	.	.	.	.	.	.	.	.	.	.	.	.	.	.	.	.	.	.	Yuen2017	1-0736-003	FAM_1-0736-003	SPX	1-0736-002	1-0736-001	F		NA	NA
477	14125.p1||10_105272461_G_A	genome	NDD	autism	10_105272461_G_A	10	105272461	G	A	9148	NEURL	+	intron			ncRNA_intronic	NEURL1-AS1	.	.	.	.	.	.	.	.	.	.	.	.	.	.	.	.	.	.	SSC	14125.p1	14125	simplex	14125.f1	14125.m1	male	94	380	377
478	gonl-214c||10_105274739_C_G	genome	control	control	10_105274739_C_G	10	105274739	C	G	9148	NEURL	+	intron	SINE	1	ncRNA_intronic	NEURL1-AS1	.	.	.	.	.	.	.	.	.	.	.	.	.	.	.	.	.	.	GONL	gonl-214c							NA	NA
479	AU3937301||10_105276329_G_C	genome	NDD	autism	10_105276329_G_C	10	105276329	G	C	9148	NEURL	+	intron	LINE	1	ncRNA_intronic	NEURL1-AS1	.	.	.	.	.	.	.	.	.	.	.	.	.	.	.	.	.	.	Yuen2017	AU3937301	FAM_AU3937301	SPX	AU3937201	AU3937202	F		NA	NA
480	13115.p1||10_105282001_C_T	genome	NDD	autism	10_105282001_C_T	10	105282001	C	T	9148	NEURL	+	intron	LTR	1	intronic	NEURL1	.	.	.	.	.	.	.	.	.	.	.	.	.	.	.	.	.	.	SSC	13115.p1	13115	simplex	13115.f1	13115.m1	male	93	446	418
481	11414.s1||10_105287575_G_A	genome	control	control	10_105287575_G_A	10	105287575	G	A	9148	NEURL	+	intron	LTR	1	intronic	NEURL1	.	.	.	.	.	.	.	.	.	.	.	.	.	.	.	.	.	.	Turner_2017;SSC	11414.s1	;11414	;simplex	;11414.f1	;11414.m1	;female	;.	NA;368	NA;351
482	12906.s1||10_105289446_A_G	genome	control	control	10_105289446_A_G	10	105289446	A	G	9148	NEURL	+	intron	LTR	1	intronic	NEURL1	.	.	.	.	.	.	.	.	.	.	.	.	.	.	.	.	.	.	SSC	12906.s1	12906	simplex	12906.f1	12906.m1	female	.	537	448
483	AU003405||10_105294390_C_T	genome	NDD	autism	10_105294390_C_T	10	105294390	C	T	9148	NEURL	+	intron	LINE	1	intronic	NEURL1	.	.	.	.	.	.	.	.	.	.	.	.	.	.	.	.	.	.	Yuen2017	AU003405	FAM_AU003406	MPX	AU003402	AU003401	M		NA	NA
484	12041.p1||10_105295759_G_A	genome	NDD	autism	10_105295759_G_A	10	105295759	G	A	9148	NEURL	+	intron	LINE	1	intronic	NEURL1	.	.	.	.	.	.	.	.	.	.	.	.	.	.	.	.	.	.	Turner_2017;SSC	12041.p1	;12041	;simplex	;12041.f1	;12041.m1	;male	;119	NA;375	NA;365
485	11496.s1||10_105313757_G_T	genome	control	control	10_105313757_G_T	10	105313757	G	T	9148	NEURL	+	intron	SINE	1	intronic	NEURL1	.	.	.	.	.	.	.	.	.	.	.	.	.	.	.	.	.	.	SSC	11496.s1	11496	simplex	11496.f1	11496.m1	male	.	487	486
486	12381.s1||10_105317495_C_T	genome	control	control	10_105317495_C_T	10	105317495	C	T	9148	NEURL	+	intron			intronic	NEURL1	.	.	.	.	.	.	.	.	.	.	.	.	.	.	.	.	.	.	Turner_2017;SSC	12381.s1	;12381	;simplex	;12381.f1	;12381.m1	;female	;.	NA;274	NA;259
487	14384.s1||10_105318400_G_A	genome	control	control	10_105318400_G_A	10	105318400	G	A	9148	NEURL	+	intron			intronic	NEURL1	.	.	.	.	.	.	.	.	.	.	.	.	.	.	.	.	.	.	SSC	14384.s1	14384	simplex	14384.f1	14384.m1	female	.	387	307
488	12381.s1||10_105320515_A_T	genome	control	control	10_105320515_A_T	10	105320515	A	T	9148	NEURL	+	intron	SINE	1	intronic	NEURL1	.	.	.	.	.	.	.	.	.	.	.	.	.	.	.	.	.	.	Turner_2017;SSC	12381.s1	;12381	;simplex	;12381.f1	;12381.m1	;female	;.	NA;274	NA;259
489	11508.s1||10_105321246_C_T	genome	control	control	10_105321246_C_T	10	105321246	C	T	9148	NEURL	+	intron	SINE	1	intronic	NEURL1	.	.	.	.	.	.	.	.	.	.	.	.	.	.	.	.	.	.	Turner_2017;SSC	11508.s1	;11508	;simplex	;11508.f1	;11508.m1	;male	;.	NA;375	NA;365
490	1-0558-003||10_105321500_A_G	genome	NDD	autism	10_105321500_A_G	10	105321500	A	G	9148	NEURL	+	intron			intronic	NEURL1	.	.	.	.	.	.	.	.	.	.	.	.	.	.	.	.	.	.	Yuen2017	1-0558-003	FAM_1-0558-003	SPX	1-0558-002	1-0558-001	M		NA	NA
491	13053.p1||10_105329465_C_G	genome	NDD	autism	10_105329465_C_G	10	105329465	C	G	9148	NEURL	+	intron			intronic	NEURL1	.	.	.	.	.	.	.	.	.	.	.	.	.	.	.	.	.	.	SSC	13053.p1	13053	simplex	13053.f1	13053.m1	male	49	544	467
492	13628.p1||10_105332343_G_T	genome	NDD	autism	10_105332343_G_T	10	105332343	G	T	9148	NEURL	+	intron			intronic	NEURL1	.	.	.	.	.	.	.	.	.	.	.	.	.	.	.	.	.	.	SSC	13628.p1	13628	simplex	13628.f1	13628.m1	male	108	515	396
493	AU2035301|AU2035302||10_105335111_C_G	genome	NDD	autism	10_105335111_C_G	10	105335111	C	G	9148	NEURL	+	intron			intronic	NEURL1	.	.	.	.	.	.	.	.	.	.	.	.	.	.	.	.	.	.	Yuen2017	AU2035301|AU2035302	FAM_AU2035302	SPX	AU2035201	AU2035202	F		NA	NA
494	1-0273-004||10_105343387_T_C	genome	NDD	autism	10_105343387_T_C	10	105343387	T	C	9148	NEURL	+	intron	SINE	1	intronic	NEURL1	.	.	.	.	.	.	.	.	.	.	.	.	.	.	.	.	.	.	Yuen2017	1-0273-004	FAM_1-0273-004	MPX	1-0273-002	1-0273-001	M		NA	NA
495	11079.s1||10_105345716_G_T	genome	control	control	10_105345716_G_T	10	105345716	G	T	9148	NEURL	+	intron			intronic	NEURL1	.	.	.	.	.	.	.	.	.	.	.	.	.	.	.	.	.	.	SSC	11079.s1	11079	simplex	11079.f1	11079.m1	female	.	386	328
496	AU024004||10_105346669_G_A	genome	NDD	autism	10_105346669_G_A	10	105346669	G	A	9148	NEURL	+	intron	SINE	1	intronic	NEURL1	.	.	.	.	.	.	.	.	.	.	.	.	.	.	.	.	.	.	Yuen2017	AU024004	FAM_AU024004	MPX	AU024002	AU024001	M		NA	NA
497	AU2139303||10_105350555_C_T	genome	NDD	autism	10_105350555_C_T	10	105350555	C	T	9148	NEURL	+	3'UTR	DNA	1	UTR3	NEURL1	NM_004210:c.*426C>T	.	.	.	.	.	.	.	.	.	.	.	.	.	.	.	.	.	Yuen2017	AU2139303	FAM_AU2139305	MPX	AU2139201	AU2139202	M		NA	NA
498	13239.s1||10_105359093_G_A	genome	control	control	10_105359093_G_A	10	105359093	G	A	9644	SH3PXD2A	-	3'UTR			UTR3	SH3PXD2A	NM_014631:c.*2480C>T	.	.	.	.	.	.	.	.	.	.	.	.	.	.	.	.	.	Turner_2017;SSC	13239.s1	;13239	;simplex	;13239.f1	;13239.m1	;male	;.	NA;262	NA;311
499	12891.s1||10_105366917_T_G	genome	control	control	10_105366917_T_G	10	105366917	T	G	9644	SH3PXD2A	-	intron	Other	1	intronic	SH3PXD2A	.	.	.	.	.	.	.	.	.	.	.	.	.	.	.	.	.	.	Turner_2017	12891.s1							NA	NA
500	11114.s1||10_105369424_G_C	genome	control	control	10_105369424_G_C	10	105369424	G	C	9644	SH3PXD2A	-	intron	LINE	1	intronic	SH3PXD2A	.	.	.	.	.	.	.	.	.	.	.	.	.	.	.	.	.	.	SSC	11114.s1	11114	simplex	11114.f1	11114.m1	female	.	314	275
501	7-0161-003||10_105377237_T_C	genome	NDD	autism	10_105377237_T_C	10	105377237	T	C	9644	SH3PXD2A	-	intron			intronic	SH3PXD2A	.	.	.	.	.	.	.	.	.	.	.	.	.	.	.	.	.	.	Yuen2017	7-0161-003	FAM_7-0161-003	SPX	7-0161-002	7-0161-001	M		NA	NA
502	13131.p1||10_105386220_G_A	genome	NDD	autism	10_105386220_G_A	10	105386220	G	A	9644	SH3PXD2A	-	intron			intronic	SH3PXD2A	.	.	.	.	.	.	.	.	.	.	.	.	.	.	.	.	.	.	SSC	13131.p1	13131	simplex	13131.f1	13131.m1	male	79	415	419
503	11753.p1||10_105392056_C_T	genome	NDD	autism	10_105392056_C_T	10	105392056	C	T	9644	SH3PXD2A	-	intron			intronic	SH3PXD2A	.	.	.	.	.	.	.	.	.	.	.	.	.	.	.	.	.	.	Turner_2017	11753.p1							NA	NA
504	14645.s1||10_105405148_G_A	genome	control	control	10_105405148_G_A	10	105405148	G	A	9644	SH3PXD2A	-	intron			intronic	SH3PXD2A	.	.	.	.	.	.	.	.	.	.	.	.	.	.	.	.	.	.	Turner_2017;SSC	14645.s1	;14645	;simplex	;14645.f1	;14645.m1	;female	;.	NA;419	NA;434
505	5-0040-003||10_105413602_G_A	genome	NDD	autism	10_105413602_G_A	10	105413602	G	A	9644	SH3PXD2A	-	intron			intronic	SH3PXD2A	.	.	.	.	.	.	.	.	.	.	.	.	.	.	.	.	.	.	Yuen2017	5-0040-003	FAM_5-0040-003	SPX	5-0040-002	5-0040-001	M		NA	NA
506	12325.p1||10_105423320_C_A	genome	NDD	autism	10_105423320_C_A	10	105423320	C	A	9644	SH3PXD2A	-	intron	DNA	1	intronic	SH3PXD2A	.	.	.	.	.	.	.	.	.	.	.	.	.	.	.	.	.	.	SSC	12325.p1	12325	simplex	12325.f1	12325.m1	male	106	372	322
507	1-0285-003||10_105423362_C_T	genome	NDD	autism	10_105423362_C_T	10	105423362	C	T	9644	SH3PXD2A	-	intron	DNA	1	intronic	SH3PXD2A	.	.	.	.	.	.	.	.	.	.	.	.	.	.	.	.	.	.	Yuen2017	1-0285-003	FAM_1-0285-004	MPX	1-0285-002	1-0285-001	M		NA	NA
508	AU3605304||10_105426001_C_T	genome	NDD	autism	10_105426001_C_T	10	105426001	C	T	9644	SH3PXD2A	-	intron	LINE	1	intronic	SH3PXD2A	.	.	.	.	.	.	.	.	.	.	.	.	.	.	.	.	.	.	Yuen2017	AU3605304	FAM_AU3605304	MPX	AU3605201	AU3605202	M		NA	NA
509	1-0344-003||10_105426484_C_T	genome	NDD	autism	10_105426484_C_T	10	105426484	C	T	9644	SH3PXD2A	-	intron	SINE	1	intronic	SH3PXD2A	.	.	.	.	.	.	.	.	.	.	.	.	.	.	.	.	.	.	Yuen2017	1-0344-003	FAM_1-0344-003	SPX	1-0344-002	1-0344-001	M		NA	NA
510	5-0018-003||10_105434666_A_G	genome	NDD	autism	10_105434666_A_G	10	105434666	A	G	9644	SH3PXD2A	-	intron	RC	1	intronic	SH3PXD2A	.	.	.	.	.	.	.	.	.	.	.	.	.	.	.	.	.	.	Yuen2017	5-0018-003	FAM_5-0018-003	SPX	5-0018-002	5-0018-001	M		NA	NA
511	12680.s1||10_105457524_C_T	genome	control	control	10_105457524_C_T	10	105457524	C	T	9644	SH3PXD2A	-	intron			intronic	SH3PXD2A	.	.	.	.	.	.	.	.	.	.	.	.	.	.	.	.	.	.	Turner_2017;SSC	12680.s1	;12680	;simplex	;12680.f1	;12680.m1	;male	;.	NA;469	NA;438
512	14081.s1||10_105457871_A_C	genome	control	control	10_105457871_A_C	10	105457871	A	C	9644	SH3PXD2A	-	intron			intronic	SH3PXD2A	.	.	.	.	.	.	.	.	.	.	.	.	.	.	.	.	.	.	SSC	14081.s1	14081	simplex	14081.f1	14081.m1	female	.	473	441
513	13443.s1||10_105468710_T_G	genome	control	control	10_105468710_T_G	10	105468710	T	G	9644	SH3PXD2A	-	intron			intronic	SH3PXD2A	.	.	.	.	.	.	.	.	.	.	.	.	.	.	.	.	.	.	SSC	13443.s1	13443	simplex	13443.f1	13443.m1	female	.	355	351
514	AU0636303||10_105477344_C_T	genome	NDD	autism	10_105477344_C_T	10	105477344	C	T	9644	SH3PXD2A	-	intron			intronic	SH3PXD2A	.	.	.	.	.	.	.	.	.	.	.	.	.	.	.	.	.	.	Yuen2017	AU0636303	FAM_AU0636303	MPX	AU0636201	AU0636202	M		NA	NA
515	1-0565-004||10_105479036_T_C	genome	NDD	autism	10_105479036_T_C	10	105479036	T	C	9644	SH3PXD2A	-	intron			intronic	SH3PXD2A	.	.	.	.	.	.	.	.	.	.	.	.	.	.	.	.	.	.	Yuen2017	1-0565-004	FAM_1-0565-004	MPX	1-0565-002	1-0565-001	M		NA	NA
516	1-0669-003||10_105483438_G_A	genome	NDD	autism	10_105483438_G_A	10	105483438	G	A	9644	SH3PXD2A	-	intron	SINE	1	intronic	SH3PXD2A	.	.	.	.	.	.	.	.	.	.	.	.	.	.	.	.	.	.	Yuen2017	1-0669-003	FAM_1-0669-003	SPX	1-0669-002	1-0669-001	F		NA	NA
517	1-0269-003||10_105490355_G_C	genome	NDD	autism	10_105490355_G_C	10	105490355	G	C	9644	SH3PXD2A	-	intron			intronic	SH3PXD2A	.	.	.	.	.	.	.	.	.	.	.	.	.	.	.	.	.	.	Yuen2017	1-0269-003	FAM_1-0269-005	MPX	1-0269-002	1-0269-001	M		NA	NA
518	14593.s1||10_105492976_C_G	genome	control	control	10_105492976_C_G	10	105492976	C	G	9644	SH3PXD2A	-	intron			intronic	SH3PXD2A	.	.	.	.	.	.	.	.	.	.	.	.	.	.	.	.	.	.	SSC	14593.s1	14593	simplex	14593.f1	14593.m1	male	.	391	382
519	14531.p1||10_105514638_G_T	genome	NDD	autism	10_105514638_G_T	10	105514638	G	T	9644	SH3PXD2A	-	intron			ncRNA_exonic	SH3PXD2A-AS1	.	.	.	.	.	.	.	.	.	.	.	.	.	.	.	.	.	.	SSC	14531.p1	14531	simplex	14531.f1	14531.m1	male	36	413	419
520	14460.p1||10_105517730_G_A	genome	NDD	autism	10_105517730_G_A	10	105517730	G	A	9644	SH3PXD2A	-	intron			intronic	SH3PXD2A	.	.	.	.	.	.	.	.	.	.	.	.	.	.	.	.	.	.	Turner_2017;SSC	14460.p1	;14460	;simplex	;14460.f1	;14460.m1	;male	;94	NA;385	NA;359
521	AU4343302||10_105531725_C_G	genome	NDD	autism	10_105531725_C_G	10	105531725	C	G	9644	SH3PXD2A	-	intron			intronic	SH3PXD2A	.	.	.	.	.	.	.	.	.	.	.	.	.	.	.	.	.	.	Yuen2017	AU4343302	FAM_AU4343302	SPX	AU4343201	AU4343202	M		NA	NA
522	2-1246-003||10_105534447_T_C	genome	NDD	autism	10_105534447_T_C	10	105534447	T	C	9644	SH3PXD2A	-	intron	LINE	1	intronic	SH3PXD2A	.	.	.	.	.	.	.	.	.	.	.	.	.	.	.	.	.	.	Yuen2017	2-1246-003	FAM_2-1246-003	MPX	2-1246-002	2-1246-001	M		NA	NA
523	11121.s1||10_105551270_A_G	genome	control	control	10_105551270_A_G	10	105551270	A	G	9644	SH3PXD2A	-	intron			intronic	SH3PXD2A	.	.	.	.	.	.	.	.	.	.	.	.	.	.	.	.	.	.	SSC	11121.s1	11121	simplex	11121.f1	11121.m1	female	.	509	474
524	12738.p1||10_105556648_G_A	genome	NDD	autism	10_105556648_G_A	10	105556648	G	A	9644	SH3PXD2A	-	intron	SINE	1	intronic	SH3PXD2A	.	.	.	.	.	.	.	.	.	.	.	.	.	.	.	.	.	.	Turner_2017	12738.p1							NA	NA
525	13533.s1||10_105564263_G_A	genome	control	control	10_105564263_G_A	10	105564263	G	A	9644	SH3PXD2A	-	intron	SINE	1	intronic	SH3PXD2A	.	.	.	.	.	.	.	.	.	.	.	.	.	.	.	.	.	.	SSC	13533.s1	13533	simplex	13533.f1	13533.m1	male	.	300	288
526	12321.s1||10_105564567_C_T	genome	control	control	10_105564567_C_T	10	105564567	C	T	9644	SH3PXD2A	-	intron			intronic	SH3PXD2A	.	.	.	.	.	.	.	.	.	.	.	.	.	.	.	.	.	.	Turner_2017	12321.s1							NA	NA
527	1-0507-003||10_105573065_T_C	genome	NDD	autism	10_105573065_T_C	10	105573065	T	C	9644	SH3PXD2A	-	intron	LINE	1	intronic	SH3PXD2A	.	.	.	.	.	.	.	.	.	.	.	.	.	.	.	.	.	.	Yuen2016	1-0507-003	FAM_1-0507-003	SPX	1-0507-002	1-0507-001	F		NA	NA
528	13507.s1||10_105579567_A_C	genome	control	control	10_105579567_A_C	10	105579567	A	C	9644	SH3PXD2A	-	intron			intronic	SH3PXD2A	.	.	.	.	.	.	.	.	.	.	.	.	.	.	.	.	.	.	SSC	13507.s1	13507	simplex	13507.f1	13507.m1	male	.	439	354
529	gonl-129d||10_105581041_C_A	genome	control	control	10_105581041_C_A	10	105581041	C	A	9644	SH3PXD2A	-	intron	SINE	1	intronic	SH3PXD2A	.	.	.	.	.	.	.	.	.	.	.	.	.	.	.	.	.	.	GONL	gonl-129d							NA	NA
530	11498.s1||10_105584278_C_T	genome	control	control	10_105584278_C_T	10	105584278	C	T	9644	SH3PXD2A	-	intron	LINE	1	intronic	SH3PXD2A	.	.	.	.	.	.	.	.	.	.	.	.	.	.	.	.	.	.	SSC	11498.s1	11498	simplex	11498.f1	11498.m1	male	.	440	385
531	14315.p1||10_105587382_G_A	genome	NDD	autism	10_105587382_G_A	10	105587382	G	A	9644	SH3PXD2A	-	intron			intronic	SH3PXD2A	.	.	.	.	.	.	.	.	.	.	.	.	.	.	.	.	.	.	Turner_2017;SSC	14315.p1	;14315	;simplex	;14315.f1	;14315.m1	;male	;97	NA;367	NA;417
532	13120.p1||10_105588329_G_A	genome	NDD	autism	10_105588329_G_A	10	105588329	G	A	9644	SH3PXD2A	-	intron			intronic	SH3PXD2A	.	.	.	.	.	.	.	.	.	.	.	.	.	.	.	.	.	.	SSC	13120.p1	13120	simplex	13120.f1	13120.m1	male	109	430	451
533	13187.p1||10_105598173_G_A	genome	NDD	autism	10_105598173_G_A	10	105598173	G	A	9644	SH3PXD2A	-	intron	SINE	1	intronic	SH3PXD2A	.	.	.	.	.	.	.	.	.	.	.	.	.	.	.	.	.	.	SSC	13187.p1	13187	simplex	13187.f1	13187.m1	male	83	385	399
534	14594.s1||10_105604950_A_G	genome	control	control	10_105604950_A_G	10	105604950	A	G	9644	SH3PXD2A	-	intron	SINE	1	intronic	SH3PXD2A	.	.	.	.	.	.	.	.	.	.	.	.	.	.	.	.	.	.	Turner_2017;SSC	14594.s1	;14594	;simplex	;14594.f1	;14594.m1	;female	;.	NA;343	NA;329
535	13439.p1||10_105613181_C_T	genome	NDD	autism	10_105613181_C_T	10	105613181	C	T	9644	SH3PXD2A	-	intron	SINE	1	intronic	SH3PXD2A	.	.	.	.	.	.	.	.	.	.	.	.	.	.	.	.	.	.	SSC	13439.p1	13439	simplex	13439.f1	13439.m1	male	90	391	432
536	11027.s1||10_1056297_G_A	genome	control	control	10_1056297_G_A	10	1056297	G	A	23560	GTPBP4	+	intron			intronic	GTPBP4	.	.	.	.	.	.	.	.	.	.	.	.	.	.	.	.	.	.	Turner_2017;SSC	11027.s1	;11027	;simplex	;11027.f1	;11027.m1	;male	;.	NA;376	NA;345
537	12763.p1||10_105637680_T_A	genome	NDD	autism	10_105637680_T_A	10	105637680	T	A	79991	OBFC1	-	3'UTR			UTR3	STN1	NM_024928:c.*4762A>T	.	.	.	.	.	.	.	.	.	.	.	.	.	.	.	.	.	SSC	12763.p1	12763	simplex	12763.f1	12763.m1	male	47	351	354
538	AU3649305||10_105652059_C_T	genome	NDD	autism	10_105652059_C_T	10	105652059	C	T	79991	OBFC1	-	intron			intronic	STN1	.	.	.	.	.	.	.	.	.	.	.	.	.	.	.	.	.	.	Yuen2017	AU3649305	FAM_AU3649305	MPX	AU3649201	AU3649202	M		NA	NA
539	11205.p1||10_105653371_A_G	genome	NDD	autism	10_105653371_A_G	10	105653371	A	G	79991	OBFC1	-	intron			intronic	STN1	.	.	.	.	.	.	.	.	.	.	.	.	.	.	.	.	.	.	SSC	11205.p1	11205	simplex	11205.f1	11205.m1	male	70	357	413
540	13920.p1||10_105654956_G_T	genome	NDD	autism	10_105654956_G_T	10	105654956	G	T	79991	OBFC1	-	intron			intronic	STN1	.	.	.	.	.	.	.	.	.	.	.	.	.	.	.	.	.	.	SSC	13920.p1	13920	simplex	13920.f1	13920.m1	male	96	319	270
541	14090.s1||10_105660653_C_T	genome	control	control	10_105660653_C_T	10	105660653	C	T	79991	OBFC1	-	intron			intronic	STN1	.	.	.	.	.	.	.	.	.	.	.	.	.	.	.	.	.	.	SSC	14090.s1	14090	simplex	14090.f1	14090.m1	male	.	487	463
542	12437.p1||10_105662267_G_A	genome	NDD	autism	10_105662267_G_A	10	105662267	G	A	79991	OBFC1	-	intron			intronic	STN1	.	.	.	.	.	.	.	.	.	.	.	.	.	.	.	.	.	.	SSC	12437.p1	12437	simplex	12437.f1	12437.m1	male	78	469	405
543	13304.p1||10_105667312_T_C	genome	NDD	autism	10_105667312_T_C	10	105667312	T	C	79991	OBFC1	-	intron			intronic	STN1	.	.	.	.	.	.	.	.	.	.	.	.	.	.	.	.	.	.	Turner_2017;SSC	13304.p1	;13304	;simplex	;13304.f1	;13304.m1	;male	;61	NA;405	NA;332
544	11521.p1||10_105667345_T_C	genome	NDD	autism	10_105667345_T_C	10	105667345	T	C	79991	OBFC1	-	intron	LINE	1	intronic	STN1	.	.	.	.	.	.	.	.	.	.	.	.	.	.	.	.	.	.	SSC	11521.p1	11521	simplex	11521.f1	11521.m1	male	101	438	425
545	13931.p1||10_105670521_T_C	genome	NDD	autism	10_105670521_T_C	10	105670521	T	C	79991	OBFC1	-	intron			intronic	STN1	.	.	.	.	.	.	.	.	.	.	.	.	.	.	.	.	.	.	SSC	13931.p1	13931	simplex	13931.f1	13931.m1	male	78	391	361
546	11219.p1||10_105730056_A_G	genome	NDD	autism	10_105730056_A_G	10	105730056	A	G	9748	SLK	+	intron			intronic	SLK	.	.	.	.	.	.	.	.	.	.	.	.	.	.	.	.	.	.	Turner_2017;SSC	11219.p1	;11219	;simplex	;11219.f1	;11219.m1	;male	;100	NA;450	NA;423
547	12706.p1||10_105732227_G_A	genome	NDD	autism	10_105732227_G_A	10	105732227	G	A	9748	SLK	+	intron	SINE	1	intronic	SLK	.	.	.	.	.	.	.	.	.	.	.	.	.	.	.	.	.	.	Turner_2017	12706.p1							NA	NA
548	14168.p1||10_105733034_T_C	genome	NDD	autism	10_105733034_T_C	10	105733034	T	C	9748	SLK	+	intron	LINE	1	intronic	SLK	.	.	.	.	.	.	.	.	.	.	.	.	.	.	.	.	.	.	SSC	14168.p1	14168	simplex	14168.f1	14168.m1	male	140	430	430
549	AU3787303||10_105738153_C_T	genome	NDD	autism	10_105738153_C_T	10	105738153	C	T	9748	SLK	+	intron			intronic	SLK	.	.	.	.	.	.	.	.	.	.	.	.	.	.	.	.	.	.	Yuen2017	AU3787303	FAM_AU3787303	MPX	AU3787201	AU3787202	M		NA	NA
550	11397.s1||10_105741305_C_G	genome	control	control	10_105741305_C_G	10	105741305	C	G	9748	SLK	+	intron	LINE	1	intronic	SLK	.	.	.	.	.	.	.	.	.	.	.	.	.	.	.	.	.	.	SSC	11397.s1	11397	simplex	11397.f1	11397.m1	female	.	454	325
551	11397.s1||10_105741724_A_T	genome	control	control	10_105741724_A_T	10	105741724	A	T	9748	SLK	+	intron	LINE	1	intronic	SLK	.	.	.	.	.	.	.	.	.	.	.	.	.	.	.	.	.	.	SSC	11397.s1	11397	simplex	11397.f1	11397.m1	female	.	454	325
552	AU005213||10_105750852_T_C	genome	NDD	autism	10_105750852_T_C	10	105750852	T	C	9748	SLK	+	intron			intronic	SLK	.	.	.	.	.	.	.	.	.	.	.	.	.	.	.	.	.	.	Yuen2017	AU005213	FAM_AU005214	MPX	AU005204	AU005205	M		NA	NA
553	11098.s1||10_105755339_C_G	genome	control	control	10_105755339_C_G	10	105755339	C	G	9748	SLK	+	intron	SINE	1	intronic	SLK	.	.	.	.	.	.	.	.	.	.	.	.	.	.	.	.	.	.	Turner_2017;SSC	11098.s1	;11098	;simplex	;11098.f1	;11098.m1	;female	;.	NA;396	NA;430
554	1-0330-004||10_105757802_A_G	genome	NDD	autism	10_105757802_A_G	10	105757802	A	G	9748	SLK	+	intron			intronic	SLK	.	.	.	.	.	.	.	.	.	.	.	.	.	.	.	.	.	.	Yuen2017	1-0330-004	FAM_1-0330-004	MPX	1-0330-002	1-0330-001	M		NA	NA
555	12118.p1||10_105764212_T_C	genome	NDD	autism	10_105764212_T_C	10	105764212	T	C	9748	SLK	+	intron			intronic	SLK	.	.	.	.	.	.	.	.	.	.	.	.	.	.	.	.	.	.	SSC	12118.p1	12118	simplex	12118.f1	12118.m1	female	74	474	428
556	2-1295-003||10_105768025_C_T	genome	NDD	autism	10_105768025_C_T	10	105768025	C	T	9748	SLK	+	CDS			exonic	SLK	.	nonsynonymous SNV	SLK:NM_001304743:exon12:c.C2695T:p.R899C,SLK:NM_014720:exon12:c.C2695T:p.R899C	D	D	D	D	D	M	T	D	T	T	T	D	35	0.935	0.985	Yuen2016	2-1295-003	FAM_2-1295-003	SPX	2-1295-002	2-1295-001	M		NA	NA
557	12073.p1||10_105780101_G_A	genome	NDD	autism	10_105780101_G_A	10	105780101	G	A	9748	SLK	+	intron			intronic	SLK	.	.	.	.	.	.	.	.	.	.	.	.	.	.	.	.	.	.	SSC	12073.p1	12073	simplex	12073.f1	12073.m1	female	111	376	381
558	13866.s1||10_105792656_C_T	genome	control	control	10_105792656_C_T	10	105792656	C	T	1308	COL17A1	-	intron			intronic	COL17A1	.	.	.	.	.	.	.	.	.	.	.	.	.	.	.	.	.	.	SSC	13866.s1	13866	simplex	13866.f1	13866.m1	female	.	415	382
559	1-0144-004||10_105795734_T_G	genome	NDD	autism	10_105795734_T_G	10	105795734	T	G	1308	COL17A1	-	intron			intronic	COL17A1	.	.	.	.	.	.	.	.	.	.	.	.	.	.	.	.	.	.	Yuen2017	1-0144-004	FAM_1-0144-005	MPX	1-0144-002	1-0144-001	M		NA	NA
560	13191.p1||10_105795790_G_C	genome	NDD	autism	10_105795790_G_C	10	105795790	G	C	1308	COL17A1	-	intron	Simple_repeat	1	intronic	COL17A1	.	.	.	.	.	.	.	.	.	.	.	.	.	.	.	.	.	.	SSC	13191.p1	13191	simplex	13191.f1	13191.m1	male	85	269	232
561	14418.s1||10_105804686_G_T	genome	control	control	10_105804686_G_T	10	105804686	G	T	1308	COL17A1	-	intron			intronic	COL17A1	.	.	.	.	.	.	.	.	.	.	.	.	.	.	.	.	.	.	SSC	14418.s1	14418	simplex	14418.f1	14418.m1	female	.	395	405
562	13934.p1||10_105807080_G_C	genome	NDD	autism	10_105807080_G_C	10	105807080	G	C	1308	COL17A1	-	intron			intronic	COL17A1	.	.	.	.	.	.	.	.	.	.	.	.	.	.	.	.	.	.	SSC	13934.p1	13934	simplex	13934.f1	13934.m1	male	43	481	512
563	13953.p1||10_105827475_G_C	genome	NDD	autism	10_105827475_G_C	10	105827475	G	C	1308	COL17A1	-	intron	LTR	1	intronic	COL17A1	.	.	.	.	.	.	.	.	.	.	.	.	.	.	.	.	.	.	SSC	13953.p1	13953	simplex	13953.f1	13953.m1	male	117	334	340
564	11568.s1||10_105831553_T_A	genome	control	control	10_105831553_T_A	10	105831553	T	A	1308	COL17A1	-	intron	LINE	1	intronic	COL17A1	.	.	.	.	.	.	.	.	.	.	.	.	.	.	.	.	.	.	SSC	11568.s1	11568	simplex	11568.f1	11568.m1	female	.	471	399
565	14058.s1||10_105897396_T_C	genome	control	control	10_105897396_T_C	10	105897396	T	C	80217	WDR96	-	intron	SINE	1	intronic	CFAP43	.	.	.	.	.	.	.	.	.	.	.	.	.	.	.	.	.	.	Turner_2017;SSC	14058.s1	;14058	;simplex	;14058.f1	;14058.m1	;female	;.	NA;488	NA;435
566	AU3900301||10_105920794_C_T	genome	NDD	autism	10_105920794_C_T	10	105920794	C	T	80217	WDR96	-	intron			splicing	CFAP43	NM_025145:exon27:c.3540+1G>A	.	.	.	.	.	.	D	.	.	.	.	.	.	D	27.3	0.935	0.997	Yuen2017	AU3900301	FAM_AU3900302	MPX	AU3900201	AU3900202	M		NA	NA
567	12526.p1||10_105935537_C_T	genome	NDD	autism	10_105935537_C_T	10	105935537	C	T	80217	WDR96	-	intron	DNA	1	intronic	CFAP43	.	.	.	.	.	.	.	.	.	.	.	.	.	.	.	.	.	.	SSC	12526.p1	12526	simplex	12526.f1	12526.m1	male	99	384	405
568	2-0323-003||10_105944885_C_T	genome	NDD	autism	10_105944885_C_T	10	105944885	C	T	80217	WDR96	-	CDS||5'UTR			exonic	CFAP43	.	nonsynonymous SNV	CFAP43:NM_025145:exon16:c.G2030A:p.R677Q	T	P	B	N	N	L	T	N	T	T	T	D	23	0.852	0.996	Yuen2017	2-0323-003	FAM_2-0323-004	MPX	2-0323-002	2-0323-001	M		NA	NA
569	gonl-209c||10_105947669_G_T	genome	control	control	10_105947669_G_T	10	105947669	G	T	80217	WDR96	-	intron			intronic	CFAP43	.	.	.	.	.	.	.	.	.	.	.	.	.	.	.	.	.	.	GONL	gonl-209c							NA	NA
570	13601.s1||10_105953578_A_G	genome	control	control	10_105953578_A_G	10	105953578	A	G	80217	WDR96	-	3'UTR			intronic	CFAP43	.	.	.	.	.	.	.	.	.	.	.	.	.	.	.	.	.	.	SSC	13601.s1	13601	simplex	13601.f1	13601.m1	male	.	406	395
571	14142.s1||10_105956509_C_T	genome	control	control	10_105956509_C_T	10	105956509	C	T	80217	WDR96	-	intron			intronic	CFAP43	.	.	.	.	.	.	.	.	.	.	.	.	.	.	.	.	.	.	Turner_2017;SSC	14142.s1	;14142	;simplex	;14142.f1	;14142.m1	;female	;.	NA;322	NA;330
572	14444.s1||10_105970195_G_A	genome	control	control	10_105970195_G_A	10	105970195	G	A	80217	WDR96	-	intron	SINE	1	intronic	CFAP43	.	.	.	.	.	.	.	.	.	.	.	.	.	.	.	.	.	.	SSC	14444.s1	14444	simplex	14444.f1	14444.m1	female	.	345	373
573	11063.p1||10_105972765_C_T	genome	NDD	autism	10_105972765_C_T	10	105972765	C	T	80217	WDR96	-	intron			intronic	CFAP43	.	.	.	.	.	.	.	.	.	.	.	.	.	.	.	.	.	.	SSC	11063.p1	11063	simplex	11063.f1	11063.m1	male	101	378	366
574	12447.p1||10_105981589_G_A	genome	NDD	autism	10_105981589_G_A	10	105981589	G	A	80217	WDR96	-	intron	SINE	1	intronic	CFAP43	.	.	.	.	.	.	.	.	.	.	.	.	.	.	.	.	.	.	SSC	12447.p1	12447	simplex	12447.f1	12447.m1	male	60	363	314
575	14244.p1||10_105990943_G_C	genome	NDD	autism	10_105990943_G_C	10	105990943	G	C	80217	WDR96	-	intron			intronic	CFAP43	.	.	.	.	.	.	.	.	.	.	.	.	.	.	.	.	.	.	Turner_2017;SSC	14244.p1	;14244	;simplex	;14244.f1	;14244.m1	;male	;61	NA;412	NA;394
576	13962.p1||10_106026870_T_G	genome	NDD	autism	10_106026870_T_G	10	106026870	T	G	9446	GSTO1	+	intron			intronic	GSTO1	.	.	.	.	.	.	.	.	.	.	.	.	.	.	.	.	.	.	SSC	13962.p1	13962	simplex	13962.f1	13962.m1	male	91	396	394
577	7-0100-004||10_106030960_A_G	genome	NDD	autism	10_106030960_A_G	10	106030960	A	G	119391	GSTO2	+	intron			intronic	GSTO2	.	.	.	.	.	.	.	.	.	.	.	.	.	.	.	.	.	.	Yuen2017	7-0100-004	FAM_7-0100-004	MPX	7-0100-002	7-0100-001	F		NA	NA
578	14446.s1||10_106039950_G_A	genome	control	control	10_106039950_G_A	10	106039950	G	A	119391	GSTO2	+	intron	LTR	1	intronic	GSTO2	.	.	.	.	.	.	.	.	.	.	.	.	.	.	.	.	.	.	SSC	14446.s1	14446	simplex	14446.f1	14446.m1	female	.	383	365
579	14587.p1||10_106044626_T_C	genome	NDD	autism	10_106044626_T_C	10	106044626	T	C	119391	GSTO2	+	intron			intronic	GSTO2	.	.	.	.	.	.	.	.	.	.	.	.	.	.	.	.	.	.	SSC	14587.p1	14587	simplex	14587.f1	14587.m1	male	102	373	291
580	13606.s1||10_106063016_G_A	genome	control	control	10_106063016_G_A	10	106063016	G	A			+	exon_unclassified	LTR	1	intergenic	GSTO2;ITPRIP	dist=3840;dist=6438	.	.	.	.	.	.	.	.	.	.	.	.	.	.	.	.	.	SSC	13606.s1	13606	simplex	13606.f1	13606.m1	female	.	343	326
581	12925.p1||10_106063352_G_A	genome	NDD	autism	10_106063352_G_A	10	106063352	G	A			+	exon_unclassified	LTR	1	intergenic	GSTO2;ITPRIP	dist=4176;dist=6102	.	.	.	.	.	.	.	.	.	.	.	.	.	.	.	.	.	SSC	12925.p1	12925	simplex	12925.f1	12925.m1	male	101	356	356
582	1-0377-003||10_106072341_G_A	genome	NDD	autism	10_106072341_G_A	10	106072341	G	A	85450	ITPRIP	-	3'UTR			UTR3	ITPRIP	NM_001272012:c.*1825C>T;NM_001272013:c.*1825C>T;NM_033397:c.*1825C>T	.	.	.	.	.	.	.	.	.	.	.	.	.	.	.	.	.	Yuen2017	1-0377-003	FAM_1-0377-003	SPX	1-0377-002	1-0377-001	M		NA	NA
583	2-1306-003|2-1306-004||10_106072978_C_T	genome	NDD	autism	10_106072978_C_T	10	106072978	C	T	85450	ITPRIP	-	3'UTR			UTR3	ITPRIP	NM_001272012:c.*1188G>A;NM_001272013:c.*1188G>A;NM_033397:c.*1188G>A	.	.	.	.	.	.	.	.	.	.	.	.	.	.	.	.	.	Yuen2017	2-1306-003|2-1306-004	FAM_2-1306-004	MPX	2-1306-002	2-1306-001	F		NA	NA
584	12228.p1||10_106082174_C_T	genome	NDD	autism	10_106082174_C_T	10	106082174	C	T	85450	ITPRIP	-	intron	DNA	1	intronic	ITPRIP	.	.	.	.	.	.	.	.	.	.	.	.	.	.	.	.	.	.	SSC	12228.p1	12228	simplex	12228.f1	12228.m1	male	117	382	334
585	14346.p1||10_106082369_G_C	genome	NDD	autism	10_106082369_G_C	10	106082369	G	C	85450	ITPRIP	-	intron			intronic	ITPRIP	.	.	.	.	.	.	.	.	.	.	.	.	.	.	.	.	.	.	SSC	14346.p1	14346	simplex	14346.f1	14346.m1	female	61	362	247
586	13609.p1||10_106090205_A_G	genome	NDD	autism	10_106090205_A_G	10	106090205	A	G	85450	ITPRIP	-	intron			intronic	ITPRIP	.	.	.	.	.	.	.	.	.	.	.	.	.	.	.	.	.	.	Turner_2017;SSC	13609.p1	;13609	;simplex	;13609.f1	;13609.m1	;male	;22	NA;445	NA;366
587	12118.s1||10_106118018_C_T	genome	control	control	10_106118018_C_T	10	106118018	C	T	159686	CCDC147	+	intron			intronic	CFAP58	.	.	.	.	.	.	.	.	.	.	.	.	.	.	.	.	.	.	SSC	12118.s1	12118	simplex	12118.f1	12118.m1	female	.	447	401
588	14305.p1||10_106122018_G_A	genome	NDD	autism	10_106122018_G_A	10	106122018	G	A	159686	CCDC147	+	intron			intronic	CFAP58	.	.	.	.	.	.	.	.	.	.	.	.	.	.	.	.	.	.	SSC	14305.p1	14305	simplex	14305.f1	14305.m1	male	109	353	364
589	2-1456-004||10_106127643_A_C	genome	NDD	autism	10_106127643_A_C	10	106127643	A	C	159686	CCDC147	+	intron			intronic	CFAP58	.	.	.	.	.	.	.	.	.	.	.	.	.	.	.	.	.	.	Yuen2017	2-1456-004	FAM_2-1456-004	MPX	2-1456-002	2-1456-001	M		NA	NA
590	13718.s1||10_106139226_T_C	genome	control	control	10_106139226_T_C	10	106139226	T	C	159686	CCDC147	+	intron	LINE	1	intronic	CFAP58	.	.	.	.	.	.	.	.	.	.	.	.	.	.	.	.	.	.	SSC	13718.s1	13718	simplex	13718.f1	13718.m1	male	.	357	340
591	13996.s1||10_106149281_T_C	genome	control	control	10_106149281_T_C	10	106149281	T	C	159686	CCDC147	+	intron			intronic	CFAP58	.	.	.	.	.	.	.	.	.	.	.	.	.	.	.	.	.	.	SSC	13996.s1	13996	simplex	13996.f1	13996.m1	male	.	489	430
592	12688.p1||10_106158218_G_A	genome	NDD	autism	10_106158218_G_A	10	106158218	G	A	159686	CCDC147	+	intron			intronic	CFAP58	.	.	.	.	.	.	.	.	.	.	.	.	.	.	.	.	.	.	SSC	12688.p1	12688	simplex	12688.f1	12688.m1	male	111	399	371
593	11691.s1||10_106162916_T_C	genome	control	control	10_106162916_T_C	10	106162916	T	C	159686	CCDC147	+	intron	LTR	1	intronic	CFAP58	.	.	.	.	.	.	.	.	.	.	.	.	.	.	.	.	.	.	SSC	11691.s1	11691	simplex	11691.f1	11691.m1	male	.	346	347
594	12160.s1||10_106163038_G_A	genome	control	control	10_106163038_G_A	10	106163038	G	A	159686	CCDC147	+	intron	LTR	1	intronic	CFAP58	.	.	.	.	.	.	.	.	.	.	.	.	.	.	.	.	.	.	SSC	12160.s1	12160	simplex	12160.f1	12160.m1	male	.	408	413
595	2-1440-003||10_106165563_T_C	genome	NDD	autism	10_106165563_T_C	10	106165563	T	C	159686	CCDC147	+	intron			intronic	CFAP58	.	.	.	.	.	.	.	.	.	.	.	.	.	.	.	.	.	.	Yuen2016	2-1440-003	FAM_2-1440-003	SPX	2-1440-002	2-1440-001	M		NA	NA
596	gonl-225c||10_106168011_G_T	genome	control	control	10_106168011_G_T	10	106168011	G	T	159686	CCDC147	+	intron	SINE	1	intronic	CFAP58	.	.	.	.	.	.	.	.	.	.	.	.	.	.	.	.	.	.	GONL	gonl-225c							NA	NA
597	12676.s1||10_106170917_C_T	genome	control	control	10_106170917_C_T	10	106170917	C	T	159686	CCDC147	+	intron	SINE	1	intronic	CFAP58	.	.	.	.	.	.	.	.	.	.	.	.	.	.	.	.	.	.	Turner_2017;SSC	12676.s1	;12676	;simplex	;12676.f1	;12676.m1	;male	;.	NA;507	NA;403
598	11715.s1||10_106182729_G_A	genome	control	control	10_106182729_G_A	10	106182729	G	A	159686	CCDC147	+	intron			intronic	CFAP58	.	.	.	.	.	.	.	.	.	.	.	.	.	.	.	.	.	.	SSC	11715.s1	11715	simplex	11715.f1	11715.m1	female	.	396	385
599	12972.s1||10_106184149_C_A	genome	control	control	10_106184149_C_A	10	106184149	C	A	159686	CCDC147	+	intron			intronic	CFAP58	.	.	.	.	.	.	.	.	.	.	.	.	.	.	.	.	.	.	SSC	12972.s1	12972	simplex	12972.f1	12972.m1	female	.	412	411
600	12434.p1||10_106187271_A_G	genome	NDD	autism	10_106187271_A_G	10	106187271	A	G	159686	CCDC147	+	intron	SINE	1	intronic	CFAP58	.	.	.	.	.	.	.	.	.	.	.	.	.	.	.	.	.	.	SSC	12434.p1	12434	simplex	12434.f1	12434.m1	male	121	538	446
601	AU017703||10_106203980_G_A	genome	NDD	autism	10_106203980_G_A	10	106203980	G	A	159686	CCDC147	+	intron			intronic	CFAP58	.	.	.	.	.	.	.	.	.	.	.	.	.	.	.	.	.	.	Yuen2017	AU017703	FAM_AU017704	MPX	AU017702	AU017701	M		NA	NA
602	13517.p1||10_106208366_C_T	genome	NDD	autism	10_106208366_C_T	10	106208366	C	T	159686	CCDC147	+	intron			intronic	CFAP58	.	.	.	.	.	.	.	.	.	.	.	.	.	.	.	.	.	.	SSC	13517.p1	13517	simplex	13517.f1	13517.m1	male	51	352	376
603	14244.s1||10_106408728_G_A	genome	control	control	10_106408728_G_A	10	106408728	G	A	22986	SORCS3	+	intron			intronic	SORCS3	.	.	.	.	.	.	.	.	.	.	.	.	.	.	.	.	.	.	Turner_2017;SSC	14244.s1	;14244	;simplex	;14244.f1	;14244.m1	;female	;.	NA;349	NA;331
604	5-0106-003||10_106410936_C_T	genome	NDD	autism	10_106410936_C_T	10	106410936	C	T	22986	SORCS3	+	intron			intronic	SORCS3	.	.	.	.	.	.	.	.	.	.	.	.	.	.	.	.	.	.	Yuen2017	5-0106-003	FAM_5-0106-003	SPX	5-0106-002	5-0106-001	M		NA	NA
605	11345.s1||10_106416693_C_A	genome	control	control	10_106416693_C_A	10	106416693	C	A	22986	SORCS3	+	intron	LTR	1	intronic	SORCS3	.	.	.	.	.	.	.	.	.	.	.	.	.	.	.	.	.	.	SSC	11345.s1	11345	simplex	11345.f1	11345.m1	male	.	368	258
606	13946.s1||10_106432951_T_G	genome	control	control	10_106432951_T_G	10	106432951	T	G	22986	SORCS3	+	intron	LINE	1	intronic	SORCS3	.	.	.	.	.	.	.	.	.	.	.	.	.	.	.	.	.	.	Turner_2017;SSC	13946.s1	;13946	;simplex	;13946.f1	;13946.m1	;female	;.	NA;473	NA;375
607	11642.s1||10_106440376_A_T	genome	control	control	10_106440376_A_T	10	106440376	A	T	22986	SORCS3	+	intron	SINE	1	intronic	SORCS3	.	.	.	.	.	.	.	.	.	.	.	.	.	.	.	.	.	.	SSC	11642.s1	11642	simplex	11642.f1	11642.m1	female	.	400	404
608	12320.p1||10_106440716_G_A	genome	NDD	autism	10_106440716_G_A	10	106440716	G	A	22986	SORCS3	+	intron			intronic	SORCS3	.	.	.	.	.	.	.	.	.	.	.	.	.	.	.	.	.	.	Turner_2017;SSC	12320.p1	;12320	;simplex	;12320.f1	;12320.m1	;male	;107	NA;543	NA;483
609	14645.s1||10_106450499_G_C	genome	control	control	10_106450499_G_C	10	106450499	G	C	22986	SORCS3	+	intron			intronic	SORCS3	.	.	.	.	.	.	.	.	.	.	.	.	.	.	.	.	.	.	Turner_2017;SSC	14645.s1	;14645	;simplex	;14645.f1	;14645.m1	;female	;.	NA;419	NA;434
610	12796.s1||10_106451059_G_A	genome	control	control	10_106451059_G_A	10	106451059	G	A	22986	SORCS3	+	intron			intronic	SORCS3	.	.	.	.	.	.	.	.	.	.	.	.	.	.	.	.	.	.	Turner_2017;SSC	12796.s1	;12796	;simplex	;12796.f1	;12796.m1	;female	;.	NA;282	NA;281
611	1-0433-004||10_106459281_A_G	genome	NDD	autism	10_106459281_A_G	10	106459281	A	G	22986	SORCS3	+	intron			intronic	SORCS3	.	.	.	.	.	.	.	.	.	.	.	.	.	.	.	.	.	.	Yuen2017	1-0433-004	FAM_1-0433-004	MPX	1-0433-002	1-0433-001	M		NA	NA
612	11578.p1||10_106459960_T_G	genome	NDD	autism	10_106459960_T_G	10	106459960	T	G	22986	SORCS3	+	intron	LTR	1	intronic	SORCS3	.	.	.	.	.	.	.	.	.	.	.	.	.	.	.	.	.	.	SSC	11578.p1	11578	simplex	11578.f1	11578.m1	male	120	400	452
613	14108.p1||10_106461537_G_T	genome	NDD	autism	10_106461537_G_T	10	106461537	G	T	22986	SORCS3	+	intron			intronic	SORCS3	.	.	.	.	.	.	.	.	.	.	.	.	.	.	.	.	.	.	Turner_2017;SSC	14108.p1	;14108	;simplex	;14108.f1	;14108.m1	;male	;129	NA;423	NA;406
614	14652.s1||10_106482606_G_A	genome	control	control	10_106482606_G_A	10	106482606	G	A	22986	SORCS3	+	intron	LINE	1	intronic	SORCS3	.	.	.	.	.	.	.	.	.	.	.	.	.	.	.	.	.	.	Turner_2017	14652.s1							NA	NA
615	13064.p1||10_106487227_C_A	genome	NDD	autism	10_106487227_C_A	10	106487227	C	A	22986	SORCS3	+	intron	LINE	1	intronic	SORCS3	.	.	.	.	.	.	.	.	.	.	.	.	.	.	.	.	.	.	SSC	13064.p1	13064	simplex	13064.f1	13064.m1	male	36	325	293
616	2-1174-006||10_106488192_G_T	genome	NDD	autism	10_106488192_G_T	10	106488192	G	T	22986	SORCS3	+	intron			intronic	SORCS3	.	.	.	.	.	.	.	.	.	.	.	.	.	.	.	.	.	.	Yuen2017	2-1174-006	FAM_2-1174-006	MPX	2-1174-002	2-1174-001	M		NA	NA
617	13099.p1||10_106491881_A_G	genome	NDD	autism	10_106491881_A_G	10	106491881	A	G	22986	SORCS3	+	intron			intronic	SORCS3	.	.	.	.	.	.	.	.	.	.	.	.	.	.	.	.	.	.	SSC	13099.p1	13099	simplex	13099.f1	13099.m1	male	87	432	465
618	AU4435301||10_106493563_C_A	genome	NDD	autism	10_106493563_C_A	10	106493563	C	A	22986	SORCS3	+	intron			intronic	SORCS3	.	.	.	.	.	.	.	.	.	.	.	.	.	.	.	.	.	.	Yuen2017	AU4435301	FAM_AU4435301	SPX	AU4435201	AU4435202	M		NA	NA
619	AU024105||10_106497692_T_C	genome	NDD	autism	10_106497692_T_C	10	106497692	T	C	22986	SORCS3	+	intron	LINE	1	intronic	SORCS3	.	.	.	.	.	.	.	.	.	.	.	.	.	.	.	.	.	.	Yuen2017	AU024105	FAM_AU024105	MPX	AU024102	AU024101	M		NA	NA
620	1-0278-003||10_106499877_T_C	genome	NDD	autism	10_106499877_T_C	10	106499877	T	C	22986	SORCS3	+	intron			intronic	SORCS3	.	.	.	.	.	.	.	.	.	.	.	.	.	.	.	.	.	.	Yuen2016	1-0278-003	FAM_1-0278-003	SPX	1-0278-002	1-0278-001	M		NA	NA
621	gonl-242c||10_106507487_C_G	genome	control	control	10_106507487_C_G	10	106507487	C	G	22986	SORCS3	+	intron	LINE	1	intronic	SORCS3	.	.	.	.	.	.	.	.	.	.	.	.	.	.	.	.	.	.	GONL	gonl-242c							NA	NA
622	11671.p1||10_106520743_A_G	genome	NDD	autism	10_106520743_A_G	10	106520743	A	G	22986	SORCS3	+	intron	DNA	1	intronic	SORCS3	.	.	.	.	.	.	.	.	.	.	.	.	.	.	.	.	.	.	SSC	11671.p1	11671	simplex	11671.f1	11671.m1	male	85	426	330
623	11736.s1||10_106546206_T_C	genome	control	control	10_106546206_T_C	10	106546206	T	C	22986	SORCS3	+	intron	SINE	1	intronic	SORCS3	.	.	.	.	.	.	.	.	.	.	.	.	.	.	.	.	.	.	Turner_2017;SSC	11736.s1	;11736	;simplex	;11736.f1	;11736.m1	;female	;.	NA;436	NA;424
624	11872.s1||10_106547293_G_C	genome	control	control	10_106547293_G_C	10	106547293	G	C	22986	SORCS3	+	intron			intronic	SORCS3	.	.	.	.	.	.	.	.	.	.	.	.	.	.	.	.	.	.	SSC	11872.s1	11872	simplex	11872.f1	11872.m1	female	.	491	425
625	11753.s1||10_106549817_C_A	genome	control	control	10_106549817_C_A	10	106549817	C	A	22986	SORCS3	+	intron			intronic	SORCS3	.	.	.	.	.	.	.	.	.	.	.	.	.	.	.	.	.	.	Turner_2017;SSC	11753.s1	;11753	;simplex	;11753.f1	;11753.m1	;female	;.	NA;487	NA;384
626	13514.p1||10_106591192_A_G	genome	NDD	autism	10_106591192_A_G	10	106591192	A	G	22986	SORCS3	+	intron	LTR	1	intronic	SORCS3	.	.	.	.	.	.	.	.	.	.	.	.	.	.	.	.	.	.	Turner_2017;SSC	13514.p1	;13514	;simplex	;13514.f1	;13514.m1	;male	;36	NA;394	NA;364
627	13107.p1||10_106629108_C_T	genome	NDD	autism	10_106629108_C_T	10	106629108	C	T	22986	SORCS3	+	intron	LTR	1	intronic	SORCS3	.	.	.	.	.	.	.	.	.	.	.	.	.	.	.	.	.	.	SSC	13107.p1	13107	simplex	13107.f1	13107.m1	male	94	377	389
628	7-0106-003||10_106634320_T_G	genome	NDD	autism	10_106634320_T_G	10	106634320	T	G	22986	SORCS3	+	intron	LINE	1	intronic	SORCS3	.	.	.	.	.	.	.	.	.	.	.	.	.	.	.	.	.	.	Yuen2017	7-0106-003	FAM_7-0106-003	SPX	7-0106-002	7-0106-001	F		NA	NA
629	13539.p1||10_106635141_A_G	genome	NDD	autism	10_106635141_A_G	10	106635141	A	G	22986	SORCS3	+	intron	SINE	1	intronic	SORCS3	.	.	.	.	.	.	.	.	.	.	.	.	.	.	.	.	.	.	Turner_2017;SSC	13539.p1	;13539	;simplex	;13539.f1	;13539.m1	;male	;86	NA;565	NA;513
630	13373.s1||10_106635365_A_C	genome	control	control	10_106635365_A_C	10	106635365	A	C	22986	SORCS3	+	intron			intronic	SORCS3	.	.	.	.	.	.	.	.	.	.	.	.	.	.	.	.	.	.	SSC	13373.s1	13373	simplex	13373.f1	13373.m1	male	.	424	347
631	11234.p1||10_106638139_T_C	genome	NDD	autism	10_106638139_T_C	10	106638139	T	C	22986	SORCS3	+	intron	LINE	1	intronic	SORCS3	.	.	.	.	.	.	.	.	.	.	.	.	.	.	.	.	.	.	Turner_2017;SSC	11234.p1	;11234	;simplex	;11234.f1	;11234.m1	;male	;117	NA;454	NA;372
632	2-1114-003||10_106642927_A_G	genome	NDD	autism	10_106642927_A_G	10	106642927	A	G	22986	SORCS3	+	intron			intronic	SORCS3	.	.	.	.	.	.	.	.	.	.	.	.	.	.	.	.	.	.	Yuen2017	2-1114-003	FAM_2-1114-003	SPX	2-1114-002	2-1114-001	M		NA	NA
633	13748.p1||10_106646273_G_A	genome	NDD	autism	10_106646273_G_A	10	106646273	G	A	22986	SORCS3	+	intron	Simple_repeat	1	intronic	SORCS3	.	.	.	.	.	.	.	.	.	.	.	.	.	.	.	.	.	.	Turner_2017;SSC	13748.p1	;13748	;simplex	;13748.f1	;13748.m1	;male	;112	NA;402	NA;343
634	12510.s1||10_106647580_A_G	genome	control	control	10_106647580_A_G	10	106647580	A	G	22986	SORCS3	+	intron			intronic	SORCS3	.	.	.	.	.	.	.	.	.	.	.	.	.	.	.	.	.	.	SSC	12510.s1	12510	simplex	12510.f1	12510.m1	male	.	600	518
635	11440.s1||10_106651699_A_C	genome	control	control	10_106651699_A_C	10	106651699	A	C	22986	SORCS3	+	intron			intronic	SORCS3	.	.	.	.	.	.	.	.	.	.	.	.	.	.	.	.	.	.	Turner_2017;SSC	11440.s1	;11440	;simplex	;11440.f1	;11440.m1	;female	;.	NA;468	NA;416
636	13998.p1||10_106655181_C_T	genome	NDD	autism	10_106655181_C_T	10	106655181	C	T	22986	SORCS3	+	intron			intronic	SORCS3	.	.	.	.	.	.	.	.	.	.	.	.	.	.	.	.	.	.	SSC	13998.p1	13998	simplex	13998.f1	13998.m1	male	89	448	378
637	13197.p1||10_106681966_G_C	genome	NDD	autism	10_106681966_G_C	10	106681966	G	C	22986	SORCS3	+	intron			intronic	SORCS3	.	.	.	.	.	.	.	.	.	.	.	.	.	.	.	.	.	.	SSC	13197.p1	13197	simplex	13197.f1	13197.m1	male	64	416	387
638	13115.p1||10_106686755_G_T	genome	NDD	autism	10_106686755_G_T	10	106686755	G	T	22986	SORCS3	+	intron			intronic	SORCS3	.	.	.	.	.	.	.	.	.	.	.	.	.	.	.	.	.	.	SSC	13115.p1	13115	simplex	13115.f1	13115.m1	male	93	446	418
639	2-1709-003||10_106688308_G_A	genome	NDD	autism	10_106688308_G_A	10	106688308	G	A	22986	SORCS3	+	intron			intronic	SORCS3	.	.	.	.	.	.	.	.	.	.	.	.	.	.	.	.	.	.	Yuen2017	2-1709-003	FAM_2-1709-003	SPX	2-1709-002	2-1709-001	M		NA	NA
640	14180.p1||10_106690330_A_G	genome	NDD	autism	10_106690330_A_G	10	106690330	A	G	22986	SORCS3	+	intron			intronic	SORCS3	.	.	.	.	.	.	.	.	.	.	.	.	.	.	.	.	.	.	SSC	14180.p1	14180	simplex	14180.f1	14180.m1	male	112	460	385
641	AU4476302||10_106723243_T_G	genome	NDD	autism	10_106723243_T_G	10	106723243	T	G	22986	SORCS3	+	intron	LINE	1	intronic	SORCS3	.	.	.	.	.	.	.	.	.	.	.	.	.	.	.	.	.	.	Yuen2017	AU4476302	FAM_AU4476302	SPX	AU4476201	AU4476202	F		NA	NA
642	12510.s1||10_106726309_A_G	genome	control	control	10_106726309_A_G	10	106726309	A	G	22986	SORCS3	+	intron			intronic	SORCS3	.	.	.	.	.	.	.	.	.	.	.	.	.	.	.	.	.	.	SSC	12510.s1	12510	simplex	12510.f1	12510.m1	male	.	600	518
643	1-0300-004||10_106729709_G_A	genome	NDD	autism	10_106729709_G_A	10	106729709	G	A	22986	SORCS3	+	intron			intronic	SORCS3	.	.	.	.	.	.	.	.	.	.	.	.	.	.	.	.	.	.	Yuen2017	1-0300-004	FAM_1-0300-004	MPX	1-0300-002	1-0300-001	M		NA	NA
644	1-0756-005||10_106745108_G_A	genome	NDD	autism	10_106745108_G_A	10	106745108	G	A	22986	SORCS3	+	intron	DNA	1	intronic	SORCS3	.	.	.	.	.	.	.	.	.	.	.	.	.	.	.	.	.	.	Yuen2017	1-0756-005	FAM_1-0756-005	MPX	1-0756-002	1-0756-001	F		NA	NA
645	1-0417-003||10_106749644_T_C	genome	NDD	autism	10_106749644_T_C	10	106749644	T	C	22986	SORCS3	+	intron			intronic	SORCS3	.	.	.	.	.	.	.	.	.	.	.	.	.	.	.	.	.	.	Yuen2016	1-0417-003	FAM_1-0417-003	SPX	1-0417-002	1-0417-001	M		NA	NA
646	13770.s1||10_106760864_T_C	genome	control	control	10_106760864_T_C	10	106760864	T	C	22986	SORCS3	+	intron	SINE	1	intronic	SORCS3	.	.	.	.	.	.	.	.	.	.	.	.	.	.	.	.	.	.	SSC	13770.s1	13770	simplex	13770.f1	13770.m1	male	.	380	399
647	14687.s1||10_106768314_G_T	genome	control	control	10_106768314_G_T	10	106768314	G	T	22986	SORCS3	+	intron			intronic	SORCS3	.	.	.	.	.	.	.	.	.	.	.	.	.	.	.	.	.	.	SSC	14687.s1	14687	simplex	14687.f1	14687.m1	female	.	452	371
648	13526.p1||10_106768654_C_T	genome	NDD	autism	10_106768654_C_T	10	106768654	C	T	22986	SORCS3	+	intron	SINE	1	intronic	SORCS3	.	.	.	.	.	.	.	.	.	.	.	.	.	.	.	.	.	.	SSC	13526.p1	13526	simplex	13526.f1	13526.m1	male	97	410	376
649	1-0484-003||10_106776730_A_G	genome	NDD	autism	10_106776730_A_G	10	106776730	A	G	22986	SORCS3	+	intron			intronic	SORCS3	.	.	.	.	.	.	.	.	.	.	.	.	.	.	.	.	.	.	Yuen2017	1-0484-003	FAM_1-0484-003	SPX	1-0484-002	1-0484-001	F		NA	NA
650	11219.s1||10_106783523_G_T	genome	control	control	10_106783523_G_T	10	106783523	G	T	22986	SORCS3	+	intron			intronic	SORCS3	.	.	.	.	.	.	.	.	.	.	.	.	.	.	.	.	.	.	Turner_2017;SSC	11219.s1	;11219	;simplex	;11219.f1	;11219.m1	;female	;.	NA;472	NA;445
651	12460.p1||10_106784355_G_A	genome	NDD	autism	10_106784355_G_A	10	106784355	G	A	22986	SORCS3	+	intron			intronic	SORCS3	.	.	.	.	.	.	.	.	.	.	.	.	.	.	.	.	.	.	Turner_2017;SSC	12460.p1	;12460	;simplex	;12460.f1	;12460.m1	;male	;73	NA;378	NA;375
652	12916.s1||10_106788172_A_C	genome	control	control	10_106788172_A_C	10	106788172	A	C	22986	SORCS3	+	intron			intronic	SORCS3	.	.	.	.	.	.	.	.	.	.	.	.	.	.	.	.	.	.	SSC	12916.s1	12916	simplex	12916.f1	12916.m1	male	.	408	392
653	11944.p1||10_106801714_C_T	genome	NDD	autism	10_106801714_C_T	10	106801714	C	T	22986	SORCS3	+	intron	LINE	1	intronic	SORCS3	.	.	.	.	.	.	.	.	.	.	.	.	.	.	.	.	.	.	SSC	11944.p1	11944	simplex	11944.f1	11944.m1	male	103	362	381
654	gonl-186c||10_106805014_C_A	genome	control	control	10_106805014_C_A	10	106805014	C	A	22986	SORCS3	+	intron			intronic	SORCS3	.	.	.	.	.	.	.	.	.	.	.	.	.	.	.	.	.	.	GONL	gonl-186c							NA	NA
655	14483.s1||10_106822559_T_C	genome	control	control	10_106822559_T_C	10	106822559	T	C	22986	SORCS3	+	intron			intronic	SORCS3	.	.	.	.	.	.	.	.	.	.	.	.	.	.	.	.	.	.	Turner_2017;SSC	14483.s1	;14483	;simplex	;14483.f1	;14483.m1	;male	;.	NA;358	NA;343
656	12363.s1||10_106834728_A_G	genome	control	control	10_106834728_A_G	10	106834728	A	G	22986	SORCS3	+	intron			intronic	SORCS3	.	.	.	.	.	.	.	.	.	.	.	.	.	.	.	.	.	.	Turner_2017;SSC	12363.s1	;12363	;simplex	;12363.f1	;12363.m1	;male	;.	NA;371	NA;342
657	14609.p1||10_106835704_C_G	genome	NDD	autism	10_106835704_C_G	10	106835704	C	G	22986	SORCS3	+	intron	SINE	1	intronic	SORCS3	.	.	.	.	.	.	.	.	.	.	.	.	.	.	.	.	.	.	SSC	14609.p1	14609	simplex	14609.f1	14609.m1	male	59	367	376
658	14443.s1||10_106838808_A_G	genome	control	control	10_106838808_A_G	10	106838808	A	G	22986	SORCS3	+	intron	DNA	1	intronic	SORCS3	.	.	.	.	.	.	.	.	.	.	.	.	.	.	.	.	.	.	SSC	14443.s1	14443	simplex	14443.f1	14443.m1	female	.	461	460
659	2-1166-003||10_106839119_C_A	genome	NDD	autism	10_106839119_C_A	10	106839119	C	A	22986	SORCS3	+	intron			intronic	SORCS3	.	.	.	.	.	.	.	.	.	.	.	.	.	.	.	.	.	.	Yuen2016	2-1166-003	FAM_2-1166-003	SPX	2-1166-002	2-1166-001	M		NA	NA
660	13977.s1||10_106845576_A_G	genome	control	control	10_106845576_A_G	10	106845576	A	G	22986	SORCS3	+	intron			intronic	SORCS3	.	.	.	.	.	.	.	.	.	.	.	.	.	.	.	.	.	.	SSC	13977.s1	13977	simplex	13977.f1	13977.m1	male	.	361	370
661	11964.s1||10_106861064_T_G	genome	control	control	10_106861064_T_G	10	106861064	T	G	22986	SORCS3	+	intron			intronic	SORCS3	.	.	.	.	.	.	.	.	.	.	.	.	.	.	.	.	.	.	SSC	11964.s1	11964	simplex	11964.f1	11964.m1	female	.	411	398
662	AU1848302||10_106868346_A_G	genome	NDD	autism	10_106868346_A_G	10	106868346	A	G	22986	SORCS3	+	intron	LINE	1	intronic	SORCS3	.	.	.	.	.	.	.	.	.	.	.	.	.	.	.	.	.	.	Yuen2017	AU1848302	FAM_AU1848302	SPX	AU1848201	AU1848202	F		NA	NA
663	14071.p1||10_106872790_G_A	genome	NDD	autism	10_106872790_G_A	10	106872790	G	A	22986	SORCS3	+	intron	DNA	1	intronic	SORCS3	.	.	.	.	.	.	.	.	.	.	.	.	.	.	.	.	.	.	SSC	14071.p1	14071	simplex	14071.f1	14071.m1	female	91	407	344
664	AU073003||10_106873099_G_T	genome	NDD	autism	10_106873099_G_T	10	106873099	G	T	22986	SORCS3	+	intron			intronic	SORCS3	.	.	.	.	.	.	.	.	.	.	.	.	.	.	.	.	.	.	Yuen2017	AU073003	FAM_AU073006	MPX	AU073002	AU073001	M		NA	NA
665	12308.p1||10_106877390_T_A	genome	NDD	autism	10_106877390_T_A	10	106877390	T	A	22986	SORCS3	+	intron	LINE	1	intronic	SORCS3	.	.	.	.	.	.	.	.	.	.	.	.	.	.	.	.	.	.	Turner2016;SSC	12308.p1	;12308	;simplex	;12308.f1	;12308.m1	;female	;105	NA;541	NA;369
666	1-0169-004||10_106880171_T_C	genome	NDD	autism	10_106880171_T_C	10	106880171	T	C	22986	SORCS3	+	intron	LINE	1	intronic	SORCS3	.	.	.	.	.	.	.	.	.	.	.	.	.	.	.	.	.	.	Yuen2017	1-0169-004	FAM_1-0169-004	MPX	1-0169-002	1-0169-001	M		NA	NA
667	14333.s1||10_106882008_A_G	genome	control	control	10_106882008_A_G	10	106882008	A	G	22986	SORCS3	+	intron			intronic	SORCS3	.	.	.	.	.	.	.	.	.	.	.	.	.	.	.	.	.	.	SSC	14333.s1	14333	simplex	14333.f1	14333.m1	male	.	276	272
668	13271.s1||10_106889056_T_G	genome	control	control	10_106889056_T_G	10	106889056	T	G	22986	SORCS3	+	intron	LTR	1	intronic	SORCS3	.	.	.	.	.	.	.	.	.	.	.	.	.	.	.	.	.	.	SSC	13271.s1	13271	simplex	13271.f1	13271.m1	female	.	375	374
669	13144.s1||10_106891950_C_T	genome	control	control	10_106891950_C_T	10	106891950	C	T	22986	SORCS3	+	intron	SINE	1	intronic	SORCS3	.	.	.	.	.	.	.	.	.	.	.	.	.	.	.	.	.	.	SSC	13144.s1	13144	simplex	13144.f1	13144.m1	male	.	357	417
670	AU3397302||10_106898878_C_T	genome	NDD	autism	10_106898878_C_T	10	106898878	C	T	22986	SORCS3	+	intron			intronic	SORCS3	.	.	.	.	.	.	.	.	.	.	.	.	.	.	.	.	.	.	Yuen2017	AU3397302	FAM_AU3397302	SPX	AU3397201	AU3397202	M		NA	NA
671	2-1246-003||10_106908186_A_T	genome	NDD	autism	10_106908186_A_T	10	106908186	A	T	22986	SORCS3	+	intron			intronic	SORCS3	.	.	.	.	.	.	.	.	.	.	.	.	.	.	.	.	.	.	Yuen2017	2-1246-003	FAM_2-1246-003	MPX	2-1246-002	2-1246-001	M		NA	NA
672	AU1635302||10_106919663_A_G	genome	NDD	autism	10_106919663_A_G	10	106919663	A	G	22986	SORCS3	+	intron			intronic	SORCS3	.	.	.	.	.	.	.	.	.	.	.	.	.	.	.	.	.	.	Yuen2017	AU1635302	FAM_AU1635302	MPX	AU1635201	AU1635202	F		NA	NA
673	13980.p1||10_106934854_G_A	genome	NDD	autism	10_106934854_G_A	10	106934854	G	A	22986	SORCS3	+	intron	SINE	1	intronic	SORCS3	.	.	.	.	.	.	.	.	.	.	.	.	.	.	.	.	.	.	SSC	13980.p1	13980	simplex	13980.f1	13980.m1	male	97	387	390
674	11455.p1||10_106941134_G_A	genome	NDD	autism	10_106941134_G_A	10	106941134	G	A	22986	SORCS3	+	intron			intronic	SORCS3	.	.	.	.	.	.	.	.	.	.	.	.	.	.	.	.	.	.	SSC	11455.p1	11455	simplex	11455.f1	11455.m1	male	73	446	430
675	5-0064-003||10_106943039_C_T	genome	NDD	autism	10_106943039_C_T	10	106943039	C	T	22986	SORCS3	+	intron			intronic	SORCS3	.	.	.	.	.	.	.	.	.	.	.	.	.	.	.	.	.	.	Yuen2017	5-0064-003	FAM_5-0064-003	SPX	5-0064-002	5-0064-001	F		NA	NA
676	11002.p1||10_106943918_C_T	genome	NDD	autism	10_106943918_C_T	10	106943918	C	T	22986	SORCS3	+	intron	DNA	1	intronic	SORCS3	.	.	.	.	.	.	.	.	.	.	.	.	.	.	.	.	.	.	Turner_2017;SSC	11002.p1	;11002	;simplex	;11002.f1	;11002.m1	;female	;111	NA;520	NA;506
677	14679.p1||10_106945673_T_C	genome	NDD	autism	10_106945673_T_C	10	106945673	T	C	22986	SORCS3	+	intron	LINE	1	intronic	SORCS3	.	.	.	.	.	.	.	.	.	.	.	.	.	.	.	.	.	.	Turner_2017;SSC	14679.p1	;14679	;simplex	;14679.f1	;14679.m1	;female	;47	NA;501	NA;496
678	2-1360-003||10_106958169_G_A	genome	NDD	autism	10_106958169_G_A	10	106958169	G	A	22986	SORCS3	+	intron			intronic	SORCS3	.	.	.	.	.	.	.	.	.	.	.	.	.	.	.	.	.	.	Yuen2016	2-1360-003	FAM_2-1360-003	SPX	2-1360-002	2-1360-001	M		NA	NA
679	AU3517302||10_106963177_A_G	genome	NDD	autism	10_106963177_A_G	10	106963177	A	G	22986	SORCS3	+	intron			intronic	SORCS3	.	.	.	.	.	.	.	.	.	.	.	.	.	.	.	.	.	.	Yuen2017	AU3517302	FAM_AU3517302	MPX	AU3517201	AU3517202	F		NA	NA
680	AU3903301||10_106968508_T_C	genome	NDD	autism	10_106968508_T_C	10	106968508	T	C	22986	SORCS3	+	intron	DNA	1	intronic	SORCS3	.	.	.	.	.	.	.	.	.	.	.	.	.	.	.	.	.	.	Yuen2017	AU3903301	FAM_AU3903302	MPX	AU3903201	AU3903202	F		NA	NA
681	12703.p1||10_106990900_C_T	genome	NDD	autism	10_106990900_C_T	10	106990900	C	T	22986	SORCS3	+	intron	LINE	1	intronic	SORCS3	.	.	.	.	.	.	.	.	.	.	.	.	.	.	.	.	.	.	SSC	12703.p1	12703	simplex	12703.f1	12703.m1	male	58	420	435
682	1-0382-004||10_106991335_G_A	genome	NDD	autism	10_106991335_G_A	10	106991335	G	A	22986	SORCS3	+	intron	LINE	1	intronic	SORCS3	.	.	.	.	.	.	.	.	.	.	.	.	.	.	.	.	.	.	Yuen2017	1-0382-004	FAM_1-0382-004	MPX	1-0382-002	1-0382-001	M		NA	NA
683	12592.p1||10_106992884_C_A	genome	NDD	autism	10_106992884_C_A	10	106992884	C	A	22986	SORCS3	+	intron	LINE	1	intronic	SORCS3	.	.	.	.	.	.	.	.	.	.	.	.	.	.	.	.	.	.	SSC	12592.p1	12592	simplex	12592.f1	12592.m1	male	119	528	454
684	1-0300-004||10_107003164_G_C	genome	NDD	autism	10_107003164_G_C	10	107003164	G	C	22986	SORCS3	+	intron			intronic	SORCS3	.	.	.	.	.	.	.	.	.	.	.	.	.	.	.	.	.	.	Yuen2017	1-0300-004	FAM_1-0300-004	MPX	1-0300-002	1-0300-001	M		NA	NA
685	12833.s1||10_107020452_G_T	genome	control	control	10_107020452_G_T	10	107020452	G	T	22986	SORCS3	+	intron			intronic	SORCS3	.	.	.	.	.	.	.	.	.	.	.	.	.	.	.	.	.	.	Turner_2017;SSC	12833.s1	;12833	;simplex	;12833.f1	;12833.m1	;female	;.	NA;414	NA;456
686	1-0344-003||10_107023532_C_T	genome	NDD	autism	10_107023532_C_T	10	107023532	C	T	22986	SORCS3	+	3'UTR			UTR3	SORCS3	NM_014978:c.*400C>T	.	.	.	.	.	.	.	.	.	.	.	.	.	.	.	.	.	Yuen2017	1-0344-003	FAM_1-0344-003	SPX	1-0344-002	1-0344-001	M		NA	NA
687	14167.p1||10_107024044_A_T	genome	NDD	autism	10_107024044_A_T	10	107024044	A	T	22986	SORCS3	+	3'UTR			UTR3	SORCS3	NM_014978:c.*912A>T	.	.	.	.	.	.	.	.	.	.	.	.	.	.	.	.	.	Turner_2017;SSC	14167.p1	;14167	;simplex	;14167.f1	;14167.m1	;male	;115	NA;382	NA;379
688	14601.p1||10_107900674_T_C	genome	NDD	autism	10_107900674_T_C	10	107900674	T	C			+	intron	LINE	1	ncRNA_intronic	LOC105378470	.	.	.	.	.	.	.	.	.	.	.	.	.	.	.	.	.	.	SSC	14601.p1	14601	simplex	14601.f1	14601.m1	female	42	354	381
689	12851.s1||10_107912153_C_T	genome	control	control	10_107912153_C_T	10	107912153	C	T			+	intron	LINE	1	ncRNA_intronic	LOC105378470	.	.	.	.	.	.	.	.	.	.	.	.	.	.	.	.	.	.	SSC	12851.s1	12851	simplex	12851.f1	12851.m1	male	.	460	456
690	AU055004||10_108335241_T_C	genome	NDD	autism	10_108335241_T_C	10	108335241	T	C	114815	SORCS1	-	3'UTR			UTR3	SORCS1	NM_001206572:c.*2065A>G;NM_001206570:c.*1781A>G;NM_052918:c.*1937A>G;NM_001013031:c.*1738A>G	.	.	.	.	.	.	.	.	.	.	.	.	.	.	.	.	.	Yuen2017	AU055004	FAM_AU055004	MPX	AU055002	AU055001	M		NA	NA
691	7-0058-003||10_108342528_C_T	genome	NDD	autism	10_108342528_C_T	10	108342528	C	T	114815	SORCS1	-	intron			intronic	SORCS1	.	.	.	.	.	.	.	.	.	.	.	.	.	.	.	.	.	.	Yuen2017	7-0058-003	FAM_7-0058-003	SPX	7-0058-002	7-0058-001	M		NA	NA
692	13793.s1||10_108349890_C_T	genome	control	control	10_108349890_C_T	10	108349890	C	T	114815	SORCS1	-	intron			intronic	SORCS1	.	.	.	.	.	.	.	.	.	.	.	.	.	.	.	.	.	.	SSC	13793.s1	13793	simplex	13793.f1	13793.m1	female	.	349	309
693	13099.s1||10_108351434_T_C	genome	control	control	10_108351434_T_C	10	108351434	T	C	114815	SORCS1	-	intron			intronic	SORCS1	.	.	.	.	.	.	.	.	.	.	.	.	.	.	.	.	.	.	SSC	13099.s1	13099	simplex	13099.f1	13099.m1	male	.	447	480
694	1-0010-005||10_10836566_C_T	genome	NDD	autism	10_10836566_C_T	10	10836566	C	T	207107	SFTA1P	-	intron			ncRNA_intronic	SFTA1P	.	.	.	.	.	.	.	.	.	.	.	.	.	.	.	.	.	.	Yuen2017	1-0010-005	FAM_1-0010-005	MPX	1-0010-002	1-0010-001	M		NA	NA
695	14151.p1||10_108389096_C_T	genome	NDD	autism	10_108389096_C_T	10	108389096	C	T	114815	SORCS1	-	CDS			exonic	SORCS1	.	synonymous SNV	SORCS1:NM_001013031:exon19:c.G2526A:p.A842A,SORCS1:NM_001206569:exon19:c.G2526A:p.A842A,SORCS1:NM_001206570:exon19:c.G2526A:p.A842A,SORCS1:NM_001206571:exon19:c.G2526A:p.A842A,SORCS1:NM_001206572:exon19:c.G2526A:p.A842A,SORCS1:NM_052918:exon19:c.G2526A:p.A842A	.	.	.	.	.	.	.	.	.	.	.	.	.	.	.	Turner_2017;SSC	14151.p1	;14151	;simplex	;14151.f1	;14151.m1	;male	;97	NA;254	NA;253
696	13946.p1||10_108393025_G_A	genome	NDD	autism	10_108393025_G_A	10	108393025	G	A	114815	SORCS1	-	intron	LINE	1	intronic	SORCS1	.	.	.	.	.	.	.	.	.	.	.	.	.	.	.	.	.	.	Turner_2017;SSC	13946.p1	;13946	;simplex	;13946.f1	;13946.m1	;male	;82	NA;522	NA;424
697	gonl-246c||10_108394928_A_G	genome	control	control	10_108394928_A_G	10	108394928	A	G	114815	SORCS1	-	intron			intronic	SORCS1	.	.	.	.	.	.	.	.	.	.	.	.	.	.	.	.	.	.	GONL	gonl-246c							NA	NA
698	12326.s1||10_108397894_A_G	genome	control	control	10_108397894_A_G	10	108397894	A	G	114815	SORCS1	-	intron			intronic	SORCS1	.	.	.	.	.	.	.	.	.	.	.	.	.	.	.	.	.	.	Turner_2017;SSC	12326.s1	;12326	;simplex	;12326.f1	;12326.m1	;female	;.	NA;353	NA;320
699	AU3713301||10_108399715_G_C	genome	NDD	autism	10_108399715_G_C	10	108399715	G	C	114815	SORCS1	-	intron	SINE	1	intronic	SORCS1	.	.	.	.	.	.	.	.	.	.	.	.	.	.	.	.	.	.	Yuen2017	AU3713301	FAM_AU3713302	MPX	AU3713201	AU3713202	M		NA	NA
700	12021.s1||10_108400627_C_T	genome	control	control	10_108400627_C_T	10	108400627	C	T	114815	SORCS1	-	intron			intronic	SORCS1	.	.	.	.	.	.	.	.	.	.	.	.	.	.	.	.	.	.	SSC	12021.s1	12021	simplex	12021.f1	12021.m1	male	.	378	295
701	1-0191-004||10_108403311_T_C	genome	NDD	autism	10_108403311_T_C	10	108403311	T	C	114815	SORCS1	-	intron			intronic	SORCS1	.	.	.	.	.	.	.	.	.	.	.	.	.	.	.	.	.	.	Yuen2017	1-0191-004	FAM_1-0191-004	MPX	1-0191-002	1-0191-001	M		NA	NA
702	AU1933302||10_108406337_C_A	genome	NDD	autism	10_108406337_C_A	10	108406337	C	A	114815	SORCS1	-	intron	SINE	1	intronic	SORCS1	.	.	.	.	.	.	.	.	.	.	.	.	.	.	.	.	.	.	Yuen2017	AU1933302	FAM_AU1933302	SPX	AU1933201	AU1933202	M		NA	NA
703	12223.s1||10_108411725_T_C	genome	control	control	10_108411725_T_C	10	108411725	T	C	114815	SORCS1	-	intron			intronic	SORCS1	.	.	.	.	.	.	.	.	.	.	.	.	.	.	.	.	.	.	SSC	12223.s1	12223	simplex	12223.f1	12223.m1	female	.	413	400
704	22161.p1||10_108424069_G_A	genome	NDD	autism	10_108424069_G_A	10	108424069	G	A	114815	SORCS1	-	intron			intronic	SORCS1	.	.	.	.	.	.	.	.	.	.	.	.	.	.	.	.	.	.	SSC	22161.p1	KOR-161	simplex	KOR-161.f1	KOR-161.m1	male		351	336
705	11000.p1||10_108447964_C_T	genome	NDD	autism	10_108447964_C_T	10	108447964	C	T	114815	SORCS1	-	CDS			exonic	SORCS1	.	nonsynonymous SNV	SORCS1:NM_001013031:exon10:c.G1546A:p.V516M,SORCS1:NM_001206569:exon10:c.G1546A:p.V516M,SORCS1:NM_001206570:exon10:c.G1546A:p.V516M,SORCS1:NM_001206571:exon10:c.G1546A:p.V516M,SORCS1:NM_001206572:exon10:c.G1546A:p.V516M,SORCS1:NM_052918:exon10:c.G1546A:p.V516M	D	D	P	D	D	L	T	N	T	T	T	N	23.9	0.935	0.951	SSC	11000.p1	11000	simplex	11000.f1	11000.m1	male	78	440	426
706	14023.s1||10_108450471_T_G	genome	control	control	10_108450471_T_G	10	108450471	T	G	114815	SORCS1	-	intron			intronic	SORCS1	.	.	.	.	.	.	.	.	.	.	.	.	.	.	.	.	.	.	SSC	14023.s1	14023	simplex	14023.f1	14023.m1	male	.	465	424
707	11397.s1||10_108475073_A_G	genome	control	control	10_108475073_A_G	10	108475073	A	G	114815	SORCS1	-	intron			intronic	SORCS1	.	.	.	.	.	.	.	.	.	.	.	.	.	.	.	.	.	.	SSC	11397.s1	11397	simplex	11397.f1	11397.m1	female	.	454	325
708	13876.s1||10_108477004_A_G	genome	control	control	10_108477004_A_G	10	108477004	A	G	114815	SORCS1	-	intron			intronic	SORCS1	.	.	.	.	.	.	.	.	.	.	.	.	.	.	.	.	.	.	SSC	13876.s1	13876	simplex	13876.f1	13876.m1	female	.	298	310
709	14484.s1||10_108479472_A_T	genome	control	control	10_108479472_A_T	10	108479472	A	T	114815	SORCS1	-	intron			intronic	SORCS1	.	.	.	.	.	.	.	.	.	.	.	.	.	.	.	.	.	.	SSC	14484.s1	14484	simplex	14484.f1	14484.m1	female	.	412	355
710	14350.s1||10_108497385_A_G	genome	control	control	10_108497385_A_G	10	108497385	A	G	114815	SORCS1	-	intron	SINE	1	intronic	SORCS1	.	.	.	.	.	.	.	.	.	.	.	.	.	.	.	.	.	.	SSC	14350.s1	14350	simplex	14350.f1	14350.m1	male	.	423	439
711	11665.p1||10_108510482_C_G	genome	NDD	autism	10_108510482_C_G	10	108510482	C	G	114815	SORCS1	-	intron	SINE	1	intronic	SORCS1	.	.	.	.	.	.	.	.	.	.	.	.	.	.	.	.	.	.	Turner_2017	11665.p1							NA	NA
712	14645.s1||10_108510746_G_A	genome	control	control	10_108510746_G_A	10	108510746	G	A	114815	SORCS1	-	intron	SINE	1	intronic	SORCS1	.	.	.	.	.	.	.	.	.	.	.	.	.	.	.	.	.	.	Turner_2017;SSC	14645.s1	;14645	;simplex	;14645.f1	;14645.m1	;female	;.	NA;419	NA;434
713	12445.s1||10_108516779_T_C	genome	control	control	10_108516779_T_C	10	108516779	T	C	114815	SORCS1	-	intron	LTR	1	intronic	SORCS1	.	.	.	.	.	.	.	.	.	.	.	.	.	.	.	.	.	.	Turner_2017;SSC	12445.s1	;12445	;simplex	;12445.f1	;12445.m1	;male	;.	NA;394	NA;388
714	11417.s1||10_108518154_C_A	genome	control	control	10_108518154_C_A	10	108518154	C	A	114815	SORCS1	-	intron			intronic	SORCS1	.	.	.	.	.	.	.	.	.	.	.	.	.	.	.	.	.	.	SSC	11417.s1	11417	simplex	11417.f1	11417.m1	male	.	435	428
715	13264.p1||10_108522480_C_T	genome	NDD	autism	10_108522480_C_T	10	108522480	C	T	114815	SORCS1	-	intron			intronic	SORCS1	.	.	.	.	.	.	.	.	.	.	.	.	.	.	.	.	.	.	SSC	13264.p1	13264	simplex	13264.f1	13264.m1	male	102	408	377
716	5-0114-003||10_108526288_C_A	genome	NDD	autism	10_108526288_C_A	10	108526288	C	A	114815	SORCS1	-	intron			intronic	SORCS1	.	.	.	.	.	.	.	.	.	.	.	.	.	.	.	.	.	.	Yuen2017	5-0114-003	FAM_5-0114-003	SPX	5-0114-002	5-0114-001	M		NA	NA
717	2-0286-003||10_108536855_A_G	genome	NDD	autism	10_108536855_A_G	10	108536855	A	G	114815	SORCS1	-	intron			intronic	SORCS1	.	.	.	.	.	.	.	.	.	.	.	.	.	.	.	.	.	.	Yuen2017	2-0286-003	FAM_2-0286-004	MPX	2-0286-002	2-0286-001	M		NA	NA
718	13552.s1||10_108538576_T_C	genome	control	control	10_108538576_T_C	10	108538576	T	C	114815	SORCS1	-	intron			intronic	SORCS1	.	.	.	.	.	.	.	.	.	.	.	.	.	.	.	.	.	.	SSC	13552.s1	13552	simplex	13552.f1	13552.m1	male	.	402	386
719	gonl-10c||10_108546002_C_T	genome	control	control	10_108546002_C_T	10	108546002	C	T	114815	SORCS1	-	intron	LTR	1	intronic	SORCS1	.	.	.	.	.	.	.	.	.	.	.	.	.	.	.	.	.	.	GONL	gonl-10c							NA	NA
720	7-0100-003||10_108546427_C_T	genome	NDD	autism	10_108546427_C_T	10	108546427	C	T	114815	SORCS1	-	intron	Simple_repeat	1	intronic	SORCS1	.	.	.	.	.	.	.	.	.	.	.	.	.	.	.	.	.	.	Yuen2017	7-0100-003	FAM_7-0100-004	MPX	7-0100-002	7-0100-001	M		NA	NA
721	1-0656-003||10_108546842_C_A	genome	NDD	autism	10_108546842_C_A	10	108546842	C	A	114815	SORCS1	-	intron			intronic	SORCS1	.	.	.	.	.	.	.	.	.	.	.	.	.	.	.	.	.	.	Yuen2017	1-0656-003	FAM_1-0656-003	SPX	1-0656-002	1-0656-001	F		NA	NA
722	14295.p1||10_108548836_C_T	genome	NDD	autism	10_108548836_C_T	10	108548836	C	T	114815	SORCS1	-	intron	LTR	1	intronic	SORCS1	.	.	.	.	.	.	.	.	.	.	.	.	.	.	.	.	.	.	SSC	14295.p1	14295	simplex	14295.f1	14295.m1	male	79	270	261
723	AU3888302||10_108552747_T_A	genome	NDD	autism	10_108552747_T_A	10	108552747	T	A	114815	SORCS1	-	intron			intronic	SORCS1	.	.	.	.	.	.	.	.	.	.	.	.	.	.	.	.	.	.	Yuen2017	AU3888302	FAM_AU3888302	SPX	AU3888201	AU3888202	M		NA	NA
724	13915.p1||10_108556149_T_G	genome	NDD	autism	10_108556149_T_G	10	108556149	T	G	114815	SORCS1	-	intron			intronic	SORCS1	.	.	.	.	.	.	.	.	.	.	.	.	.	.	.	.	.	.	SSC	13915.p1	13915	simplex	13915.f1	13915.m1	male	120	389	362
725	13952.p1||10_108569851_C_T	genome	NDD	autism	10_108569851_C_T	10	108569851	C	T	114815	SORCS1	-	intron	SINE	1	intronic	SORCS1	.	.	.	.	.	.	.	.	.	.	.	.	.	.	.	.	.	.	Turner_2017;SSC	13952.p1	;13952	;simplex	;13952.f1	;13952.m1	;male	;15	NA;395	NA;331
726	14108.s1||10_108570575_G_A	genome	control	control	10_108570575_G_A	10	108570575	G	A	114815	SORCS1	-	intron			intronic	SORCS1	.	.	.	.	.	.	.	.	.	.	.	.	.	.	.	.	.	.	Turner_2017;SSC	14108.s1	;14108	;simplex	;14108.f1	;14108.m1	;female	;.	NA;400	NA;383
727	1-0597-003||10_108570757_G_A	genome	NDD	autism	10_108570757_G_A	10	108570757	G	A	114815	SORCS1	-	intron	SINE	1	intronic	SORCS1	.	.	.	.	.	.	.	.	.	.	.	.	.	.	.	.	.	.	Yuen2017	1-0597-003	FAM_1-0597-003	SPX	1-0597-002	1-0597-001	F		NA	NA
728	AU005214||10_108586570_C_G	genome	NDD	autism	10_108586570_C_G	10	108586570	C	G	114815	SORCS1	-	intron			intronic	SORCS1	.	.	.	.	.	.	.	.	.	.	.	.	.	.	.	.	.	.	Yuen2017	AU005214	FAM_AU005214	MPX	AU005204	AU005205	M		NA	NA
729	11571.p1||10_108587509_A_C	genome	NDD	autism	10_108587509_A_C	10	108587509	A	C	114815	SORCS1	-	intron			intronic	SORCS1	.	.	.	.	.	.	.	.	.	.	.	.	.	.	.	.	.	.	SSC	11571.p1	11571	simplex	11571.f1	11571.m1	male	94	390	373
730	11542.s1||10_108587739_C_T	genome	control	control	10_108587739_C_T	10	108587739	C	T	114815	SORCS1	-	intron	DNA	1	intronic	SORCS1	.	.	.	.	.	.	.	.	.	.	.	.	.	.	.	.	.	.	Turner_2017;SSC	11542.s1	;11542	;simplex	;11542.f1	;11542.m1	;female	;.	NA;404	NA;403
731	11542.s1||10_108587949_G_T	genome	control	control	10_108587949_G_T	10	108587949	G	T	114815	SORCS1	-	intron	SINE	1	intronic	SORCS1	.	.	.	.	.	.	.	.	.	.	.	.	.	.	.	.	.	.	Turner_2017;SSC	11542.s1	;11542	;simplex	;11542.f1	;11542.m1	;female	;.	NA;404	NA;403
732	AU4186302||10_108588647_G_A	genome	NDD	autism	10_108588647_G_A	10	108588647	G	A	114815	SORCS1	-	intron	SINE	1	intronic	SORCS1	.	.	.	.	.	.	.	.	.	.	.	.	.	.	.	.	.	.	Yuen2017	AU4186302	FAM_AU4186302	SPX	AU4186201	AU4186202	F		NA	NA
733	11496.s1||10_108591217_G_A	genome	control	control	10_108591217_G_A	10	108591217	G	A	114815	SORCS1	-	intron	LINE	1	intronic	SORCS1	.	.	.	.	.	.	.	.	.	.	.	.	.	.	.	.	.	.	SSC	11496.s1	11496	simplex	11496.f1	11496.m1	male	.	487	486
734	13424.s1||10_108596523_C_G	genome	control	control	10_108596523_C_G	10	108596523	C	G	114815	SORCS1	-	intron			intronic	SORCS1	.	.	.	.	.	.	.	.	.	.	.	.	.	.	.	.	.	.	Turner_2017;SSC	13424.s1	;13424	;simplex	;13424.f1	;13424.m1	;female	;.	NA;491	NA;440
735	13966.s1||10_108604810_A_G	genome	control	control	10_108604810_A_G	10	108604810	A	G	114815	SORCS1	-	intron	LINE	1	intronic	SORCS1	.	.	.	.	.	.	.	.	.	.	.	.	.	.	.	.	.	.	Turner_2017	13966.s1							NA	NA
736	13706.s1||10_108605380_A_C	genome	control	control	10_108605380_A_C	10	108605380	A	C	114815	SORCS1	-	intron	LINE	1	intronic	SORCS1	.	.	.	.	.	.	.	.	.	.	.	.	.	.	.	.	.	.	Turner_2017	13706.s1							NA	NA
737	14282.s1||10_108624088_G_A	genome	control	control	10_108624088_G_A	10	108624088	G	A	114815	SORCS1	-	intron	LINE	1	intronic	SORCS1	.	.	.	.	.	.	.	.	.	.	.	.	.	.	.	.	.	.	SSC	14282.s1	14282	simplex	14282.f1	14282.m1	female	.	376	337
738	14490.p1||10_1086418_C_T	genome	NDD	autism	10_1086418_C_T	10	1086418	C	T	3422	IDI1	-	3'UTR			ncRNA_intronic	IDI2-AS1	.	.	.	.	.	.	.	.	.	.	.	.	.	.	.	.	.	.	SSC	14490.p1	14490	simplex	14490.f1	14490.m1	male	55	330	292
739	13040.s1||10_108646275_T_C	genome	control	control	10_108646275_T_C	10	108646275	T	C	114815	SORCS1	-	intron			intronic	SORCS1	.	.	.	.	.	.	.	.	.	.	.	.	.	.	.	.	.	.	SSC	13040.s1	13040	simplex	13040.f1	13040.m1	female	.	422	379
740	14096.s1||10_108647673_C_T	genome	control	control	10_108647673_C_T	10	108647673	C	T	114815	SORCS1	-	intron	SINE	1	intronic	SORCS1	.	.	.	.	.	.	.	.	.	.	.	.	.	.	.	.	.	.	SSC	14096.s1	14096	simplex	14096.f1	14096.m1	female	.	329	325
741	14637.p1||10_108649594_G_C	genome	NDD	autism	10_108649594_G_C	10	108649594	G	C	114815	SORCS1	-	intron	SINE	1	intronic	SORCS1	.	.	.	.	.	.	.	.	.	.	.	.	.	.	.	.	.	.	Turner_2017	14637.p1							NA	NA
742	1-0458-005||10_108692900_T_C	genome	NDD	autism	10_108692900_T_C	10	108692900	T	C	114815	SORCS1	-	intron			intronic	SORCS1	.	.	.	.	.	.	.	.	.	.	.	.	.	.	.	.	.	.	Yuen2017	1-0458-005	FAM_1-0458-005	MPX	1-0458-002	1-0458-001	F		NA	NA
743	11565.p1||10_108696646_A_G	genome	NDD	autism	10_108696646_A_G	10	108696646	A	G	114815	SORCS1	-	intron	LTR	1	intronic	SORCS1	.	.	.	.	.	.	.	.	.	.	.	.	.	.	.	.	.	.	Turner_2017;SSC	11565.p1	;11565	;simplex	;11565.f1	;11565.m1	;male	;114	NA;387	NA;362
744	13564.s1||10_108722603_G_A	genome	control	control	10_108722603_G_A	10	108722603	G	A	114815	SORCS1	-	intron			intronic	SORCS1	.	.	.	.	.	.	.	.	.	.	.	.	.	.	.	.	.	.	Turner_2017;SSC	13564.s1	;13564	;simplex	;13564.f1	;13564.m1	;male	;.	NA;496	NA;462
745	1-0158-003||10_108737564_C_T	genome	NDD	autism	10_108737564_C_T	10	108737564	C	T	114815	SORCS1	-	intron	LINE	1	intronic	SORCS1	.	.	.	.	.	.	.	.	.	.	.	.	.	.	.	.	.	.	Yuen2017	1-0158-003	FAM_1-0158-003	SPX	1-0158-002	1-0158-001	M		NA	NA
746	gonl-136c||10_108746406_C_A	genome	control	control	10_108746406_C_A	10	108746406	C	A	114815	SORCS1	-	intron	LINE	1	intronic	SORCS1	.	.	.	.	.	.	.	.	.	.	.	.	.	.	.	.	.	.	GONL	gonl-136c							NA	NA
747	13910.s1||10_108747170_C_T	genome	control	control	10_108747170_C_T	10	108747170	C	T	114815	SORCS1	-	intron			intronic	SORCS1	.	.	.	.	.	.	.	.	.	.	.	.	.	.	.	.	.	.	Turner_2017;SSC	13910.s1	;13910	;simplex	;13910.f1	;13910.m1	;female	;.	NA;435	NA;429
748	AU058105||10_108748688_A_T	genome	NDD	autism	10_108748688_A_T	10	108748688	A	T	114815	SORCS1	-	intron			intronic	SORCS1	.	.	.	.	.	.	.	.	.	.	.	.	.	.	.	.	.	.	Yuen2017	AU058105	FAM_AU058105	MPX	AU058102	AU058101	M		NA	NA
749	13284.p1||10_108749164_C_A	genome	NDD	autism	10_108749164_C_A	10	108749164	C	A	114815	SORCS1	-	intron			intronic	SORCS1	.	.	.	.	.	.	.	.	.	.	.	.	.	.	.	.	.	.	SSC	13284.p1	13284	simplex	13284.f1	13284.m1	male	98	309	311
750	AU2485305||10_108749454_T_G	genome	NDD	autism	10_108749454_T_G	10	108749454	T	G	114815	SORCS1	-	intron	SINE	1	intronic	SORCS1	.	.	.	.	.	.	.	.	.	.	.	.	.	.	.	.	.	.	Yuen2017	AU2485305	FAM_AU2485305	SPX	AU2485201	AU2485202	M		NA	NA
751	5-0003-004||10_108753908_C_T	genome	NDD	autism	10_108753908_C_T	10	108753908	C	T	114815	SORCS1	-	intron			intronic	SORCS1	.	.	.	.	.	.	.	.	.	.	.	.	.	.	.	.	.	.	Yuen2017	5-0003-004	FAM_5-0003-004	MPX	5-0003-002	5-0003-001	M		NA	NA
752	11773.p1||10_108774497_G_A	genome	NDD	autism	10_108774497_G_A	10	108774497	G	A	114815	SORCS1	-	intron	DNA	1	intronic	SORCS1	.	.	.	.	.	.	.	.	.	.	.	.	.	.	.	.	.	.	SSC	11773.p1	11773	simplex	11773.f1	11773.m1	male	50	392	399
753	12314.s1||10_108776771_G_A	genome	control	control	10_108776771_G_A	10	108776771	G	A	114815	SORCS1	-	intron	LINE	1	intronic	SORCS1	.	.	.	.	.	.	.	.	.	.	.	.	.	.	.	.	.	.	SSC	12314.s1	12314	simplex	12314.f1	12314.m1	male	.	557	421
754	1-0196-005||10_108782275_G_A	genome	NDD	autism	10_108782275_G_A	10	108782275	G	A	114815	SORCS1	-	intron	LINE	1	intronic	SORCS1	.	.	.	.	.	.	.	.	.	.	.	.	.	.	.	.	.	.	Yuen2017	1-0196-005	FAM_1-0196-005	SPX	1-0196-002	1-0196-001	M		NA	NA
755	11736.p1||10_108791638_T_C	genome	NDD	autism	10_108791638_T_C	10	108791638	T	C	114815	SORCS1	-	intron			intronic	SORCS1	.	.	.	.	.	.	.	.	.	.	.	.	.	.	.	.	.	.	Turner_2017;SSC	11736.p1	;11736	;simplex	;11736.f1	;11736.m1	;male	;94	NA;394	NA;382
756	13393.s1||10_108798053_A_G	genome	control	control	10_108798053_A_G	10	108798053	A	G	114815	SORCS1	-	intron			intronic	SORCS1	.	.	.	.	.	.	.	.	.	.	.	.	.	.	.	.	.	.	Turner_2017;SSC	13393.s1	;13393	;simplex	;13393.f1	;13393.m1	;female	;.	NA;490	NA;411
757	14570.s1||10_108799280_G_C	genome	control	control	10_108799280_G_C	10	108799280	G	C	114815	SORCS1	-	intron			intronic	SORCS1	.	.	.	.	.	.	.	.	.	.	.	.	.	.	.	.	.	.	SSC	14570.s1	14570	simplex	14570.f1	14570.m1	female	.	354	359
758	7-0255-003||10_108800886_A_G	genome	NDD	autism	10_108800886_A_G	10	108800886	A	G	114815	SORCS1	-	intron	LINE	1	intronic	SORCS1	.	.	.	.	.	.	.	.	.	.	.	.	.	.	.	.	.	.	Yuen2017	7-0255-003	FAM_7-0255-003	SPX	7-0255-002	7-0255-001	M		NA	NA
759	11069.p1||10_108807125_C_T	genome	NDD	autism	10_108807125_C_T	10	108807125	C	T	114815	SORCS1	-	intron			intronic	SORCS1	.	.	.	.	.	.	.	.	.	.	.	.	.	.	.	.	.	.	SSC	11069.p1	11069	simplex	11069.f1	11069.m1	male	96	493	402
760	2-1281-003||10_108815533_C_T	genome	NDD	autism	10_108815533_C_T	10	108815533	C	T	114815	SORCS1	-	intron			intronic	SORCS1	.	.	.	.	.	.	.	.	.	.	.	.	.	.	.	.	.	.	Yuen2017	2-1281-003	FAM_2-1281-003	SPX	2-1281-002	2-1281-001	M		NA	NA
761	12289.p1||10_108818145_T_C	genome	NDD	autism	10_108818145_T_C	10	108818145	T	C	114815	SORCS1	-	intron	DNA	1	intronic	SORCS1	.	.	.	.	.	.	.	.	.	.	.	.	.	.	.	.	.	.	SSC	12289.p1	12289	simplex	12289.f1	12289.m1	male	109	403	416
762	11714.s1||10_108819300_C_T	genome	control	control	10_108819300_C_T	10	108819300	C	T	114815	SORCS1	-	intron			intronic	SORCS1	.	.	.	.	.	.	.	.	.	.	.	.	.	.	.	.	.	.	SSC	11714.s1	11714	simplex	11714.f1	11714.m1	male	.	452	438
763	1-0368-004||10_108824152_G_A	genome	NDD	autism	10_108824152_G_A	10	108824152	G	A	114815	SORCS1	-	intron			intronic	SORCS1	.	.	.	.	.	.	.	.	.	.	.	.	.	.	.	.	.	.	Yuen2017	1-0368-004	FAM_1-0368-004	SPX	1-0368-002	1-0368-001	M		NA	NA
764	11981.p1||10_108826572_T_C	genome	NDD	autism	10_108826572_T_C	10	108826572	T	C	114815	SORCS1	-	intron			intronic	SORCS1	.	.	.	.	.	.	.	.	.	.	.	.	.	.	.	.	.	.	SSC	11981.p1	11981	simplex	11981.f1	11981.m1	female	99	393	392
765	14127.p1||10_108861853_C_T	genome	NDD	autism	10_108861853_C_T	10	108861853	C	T	114815	SORCS1	-	intron			intronic	SORCS1	.	.	.	.	.	.	.	.	.	.	.	.	.	.	.	.	.	.	SSC	14127.p1	14127	simplex	14127.f1	14127.m1	female	76	338	292
766	2-1272-003||10_108863052_C_A	genome	NDD	autism	10_108863052_C_A	10	108863052	C	A	114815	SORCS1	-	intron			intronic	SORCS1	.	.	.	.	.	.	.	.	.	.	.	.	.	.	.	.	.	.	Yuen2016	2-1272-003	FAM_2-1272-003	SPX	2-1272-002	2-1272-001	M		NA	NA
767	gonl-219c||10_108878618_T_C	genome	control	control	10_108878618_T_C	10	108878618	T	C	114815	SORCS1	-	intron	LTR	1	intronic	SORCS1	.	.	.	.	.	.	.	.	.	.	.	.	.	.	.	.	.	.	GONL	gonl-219c							NA	NA
768	14317.s1||10_108882450_G_A	genome	control	control	10_108882450_G_A	10	108882450	G	A	114815	SORCS1	-	intron			intronic	SORCS1	.	.	.	.	.	.	.	.	.	.	.	.	.	.	.	.	.	.	SSC	14317.s1	14317	simplex	14317.f1	14317.m1	male	.	415	353
769	11266.p1||10_108884240_C_T	genome	NDD	autism	10_108884240_C_T	10	108884240	C	T	114815	SORCS1	-	intron			intronic	SORCS1	.	.	.	.	.	.	.	.	.	.	.	.	.	.	.	.	.	.	SSC	11266.p1	11266	simplex	11266.f1	11266.m1	female	73	444	445
770	13880.p1||10_108887142_C_T	genome	NDD	autism	10_108887142_C_T	10	108887142	C	T	114815	SORCS1	-	intron			intronic	SORCS1	.	.	.	.	.	.	.	.	.	.	.	.	.	.	.	.	.	.	SSC	13880.p1	13880	simplex	13880.f1	13880.m1	male	78	442	437
771	14632.p1||10_108889978_A_C	genome	NDD	autism	10_108889978_A_C	10	108889978	A	C	114815	SORCS1	-	intron			intronic	SORCS1	.	.	.	.	.	.	.	.	.	.	.	.	.	.	.	.	.	.	SSC	14632.p1	14632	simplex	14632.f1	14632.m1	male	65	429	332
772	2-1526-003||10_108892774_G_A	genome	NDD	autism	10_108892774_G_A	10	108892774	G	A	114815	SORCS1	-	intron	LTR	1	intronic	SORCS1	.	.	.	.	.	.	.	.	.	.	.	.	.	.	.	.	.	.	Yuen2017	2-1526-003	FAM_2-1526-004	MPX	2-1526-002	2-1526-001	M		NA	NA
773	2-0022-005||10_108897020_G_A	genome	NDD	autism	10_108897020_G_A	10	108897020	G	A	114815	SORCS1	-	intron			intronic	SORCS1	.	.	.	.	.	.	.	.	.	.	.	.	.	.	.	.	.	.	Yuen2017	2-0022-005	FAM_2-0022-005	MPX	2-0022-002	2-0022-001	M		NA	NA
774	11378.s1||10_108920766_A_G	genome	control	control	10_108920766_A_G	10	108920766	A	G	114815	SORCS1	-	intron			intronic	SORCS1	.	.	.	.	.	.	.	.	.	.	.	.	.	.	.	.	.	.	Turner_2017;SSC	11378.s1	;11378	;simplex	;11378.f1	;11378.m1	;male	;.	NA;402	NA;392
775	11417.p1||10_108923385_T_C	genome	NDD	autism	10_108923385_T_C	10	108923385	T	C	114815	SORCS1	-	intron			intronic	SORCS1	.	.	.	.	.	.	.	.	.	.	.	.	.	.	.	.	.	.	SSC	11417.p1	11417	simplex	11417.f1	11417.m1	male	49	456	449
776	7-0127-003||10_1093547_C_T	genome	NDD	autism	10_1093547_C_T	10	1093547	C	T	3422	IDI1	-	intron			intronic	IDI1	.	.	.	.	.	.	.	.	.	.	.	.	.	.	.	.	.	.	Yuen2017	7-0127-003	FAM_7-0127-003	SPX	7-0127-002	7-0127-001	M		NA	NA
777	11678.p1||10_10985104_T_A	genome	NDD	autism	10_10985104_T_A	10	10985104	T	A	254312	LOC254312	-	intron	LTR	1	ncRNA_intronic	LINC00710	.	.	.	.	.	.	.	.	.	.	.	.	.	.	.	.	.	.	SSC	11678.p1	11678	simplex	11678.f1	11678.m1	male	115	483	472
778	2-0300-003||10_11049108_T_C	genome	NDD	autism	10_11049108_T_C	10	11049108	T	C	10659	CELF2	+	intron			intronic	CELF2	.	.	.	.	.	.	.	.	.	.	.	.	.	.	.	.	.	.	Yuen2017	2-0300-003	FAM_2-0300-004	MPX	2-0300-002	2-0300-001	F		NA	NA
779	11252.p1||10_11055464_G_T	genome	NDD	autism	10_11055464_G_T	10	11055464	G	T	10659	CELF2	+	intron			intronic	CELF2	.	.	.	.	.	.	.	.	.	.	.	.	.	.	.	.	.	.	Turner_2017;SSC	11252.p1	;11252	;simplex	;11252.f1	;11252.m1	;male	;72	NA;602	NA;446
780	AU3874301||10_11060483_G_A	genome	NDD	autism	10_11060483_G_A	10	11060483	G	A	10659	CELF2	+	intron			UTR5	CELF2	NM_001326344:c.-146985G>A	.	.	.	.	.	.	.	.	.	.	.	.	.	.	.	.	.	Yuen2017	AU3874301	FAM_AU3874303	SPX	AU3874201	AU3874202	M		NA	NA
781	AU071204||10_11060491_G_T	genome	NDD	autism	10_11060491_G_T	10	11060491	G	T	10659	CELF2	+	intron			UTR5	CELF2	NM_001326344:c.-146977G>T	.	.	.	.	.	.	.	.	.	.	.	.	.	.	.	.	.	Yuen2017	AU071204	FAM_AU071204	MPX	AU071202	AU071201	M		NA	NA
782	14549.s1||10_11064267_G_A	genome	control	control	10_11064267_G_A	10	11064267	G	A	10659	CELF2	+	intron			intronic	CELF2	.	.	.	.	.	.	.	.	.	.	.	.	.	.	.	.	.	.	SSC	14549.s1	14549	simplex	14549.f1	14549.m1	female	.	314	329
783	gonl-72c||10_11068764_G_A	genome	control	control	10_11068764_G_A	10	11068764	G	A	10659	CELF2	+	intron			intronic	CELF2	.	.	.	.	.	.	.	.	.	.	.	.	.	.	.	.	.	.	GONL	gonl-72c							NA	NA
784	gonl-47c||10_11069316_G_A	genome	control	control	10_11069316_G_A	10	11069316	G	A	10659	CELF2	+	intron			intronic	CELF2	.	.	.	.	.	.	.	.	.	.	.	.	.	.	.	.	.	.	GONL	gonl-47c							NA	NA
785	12892.s1||10_11073114_G_A	genome	control	control	10_11073114_G_A	10	11073114	G	A	10659	CELF2	+	intron			intronic	CELF2	.	.	.	.	.	.	.	.	.	.	.	.	.	.	.	.	.	.	SSC	12892.s1	12892	simplex	12892.f1	12892.m1	female	.	418	287
786	11519.s1||10_1107914_A_G	genome	control	control	10_1107914_A_G	10	1107914	A	G	22884	WDR37	+	intron	DNA	1	intronic	WDR37	.	.	.	.	.	.	.	.	.	.	.	.	.	.	.	.	.	.	SSC	11519.s1	11519	simplex	11519.f1	11519.m1	female	.	374	358
787	AU4452302||10_11086420_T_A	genome	NDD	autism	10_11086420_T_A	10	11086420	T	A	10659	CELF2	+	intron			intronic	CELF2	.	.	.	.	.	.	.	.	.	.	.	.	.	.	.	.	.	.	Yuen2017	AU4452302	FAM_AU4452302	SPX	AU4452201	AU4452202	M		NA	NA
788	11696.s1||10_11090550_C_G	genome	control	control	10_11090550_C_G	10	11090550	C	G	10659	CELF2	+	intron			intronic	CELF2	.	.	.	.	.	.	.	.	.	.	.	.	.	.	.	.	.	.	SSC	11696.s1	11696	simplex	11696.f1	11696.m1	male	.	409	393
789	14188.s1||10_11092610_C_T	genome	control	control	10_11092610_C_T	10	11092610	C	T	10659	CELF2	+	intron			intronic	CELF2	.	.	.	.	.	.	.	.	.	.	.	.	.	.	.	.	.	.	SSC	14188.s1	14188	simplex	14188.f1	14188.m1	male	.	430	435
790	13741.s1||10_11093789_A_G	genome	control	control	10_11093789_A_G	10	11093789	A	G	10659	CELF2	+	intron			intronic	CELF2	.	.	.	.	.	.	.	.	.	.	.	.	.	.	.	.	.	.	Turner_2017;SSC	13741.s1	;13741	;simplex	;13741.f1	;13741.m1	;female	;.	NA;356	NA;267
791	AU046904||10_11096106_T_G	genome	NDD	autism	10_11096106_T_G	10	11096106	T	G	10659	CELF2	+	intron			intronic	CELF2	.	.	.	.	.	.	.	.	.	.	.	.	.	.	.	.	.	.	Yuen2017	AU046904	FAM_AU046904	MPX	AU046902	AU046901	M		NA	NA
792	7-0100-004||10_11096506_T_C	genome	NDD	autism	10_11096506_T_C	10	11096506	T	C	10659	CELF2	+	intron			intronic	CELF2	.	.	.	.	.	.	.	.	.	.	.	.	.	.	.	.	.	.	Yuen2017	7-0100-004	FAM_7-0100-004	MPX	7-0100-002	7-0100-001	F		NA	NA
793	11543.s1||10_11105398_A_C	genome	control	control	10_11105398_A_C	10	11105398	A	C	10659	CELF2	+	intron			intronic	CELF2	.	.	.	.	.	.	.	.	.	.	.	.	.	.	.	.	.	.	SSC	11543.s1	11543	simplex	11543.f1	11543.m1	female	.	375	399
794	1-0248-003||10_1110779_G_A	genome	NDD	autism	10_1110779_G_A	10	1110779	G	A	22884	WDR37	+	intron	SINE	1	intronic	WDR37	.	.	.	.	.	.	.	.	.	.	.	.	.	.	.	.	.	.	Yuen2017	1-0248-003	FAM_1-0248-003	SPX	1-0248-002	1-0248-001	M		NA	NA
795	14137.p1||10_11112303_C_T	genome	NDD	autism	10_11112303_C_T	10	11112303	C	T	10659	CELF2	+	intron	LINE	1	intronic	CELF2	.	.	.	.	.	.	.	.	.	.	.	.	.	.	.	.	.	.	SSC	14137.p1	14137	simplex	14137.f1	14137.m1	male	47	554	463
796	AU2137304||10_1112352_A_G	genome	NDD	autism	10_1112352_A_G	10	1112352	A	G	22884	WDR37	+	intron	SINE	1	intronic	WDR37	.	.	.	.	.	.	.	.	.	.	.	.	.	.	.	.	.	.	Yuen2017	AU2137304	FAM_AU2137304	SPX	AU2137201	AU2137203	M		NA	NA
797	11062.p1||10_11123831_G_A	genome	NDD	autism	10_11123831_G_A	10	11123831	G	A	10659	CELF2	+	intron			ncRNA_intronic	CELF2-AS2	.	.	.	.	.	.	.	.	.	.	.	.	.	.	.	.	.	.	SSC	11062.p1	11062	simplex	11062.f1	11062.m1	male	100	347	353
798	14279.p1||10_11145166_C_T	genome	NDD	autism	10_11145166_C_T	10	11145166	C	T	10659	CELF2	+	intron			ncRNA_intronic	CELF2-AS2	.	.	.	.	.	.	.	.	.	.	.	.	.	.	.	.	.	.	SSC	14279.p1	14279	simplex	14279.f1	14279.m1	male	112	329	282
799	13250.s1||10_11149080_C_A	genome	control	control	10_11149080_C_A	10	11149080	C	A	10659	CELF2	+	intron			intronic	CELF2	.	.	.	.	.	.	.	.	.	.	.	.	.	.	.	.	.	.	SSC	13250.s1	13250	simplex	13250.f1	13250.m1	female	.	404	367
800	2-1416-004||10_11154872_G_A	genome	NDD	autism	10_11154872_G_A	10	11154872	G	A	10659	CELF2	+	intron			intronic	CELF2	.	.	.	.	.	.	.	.	.	.	.	.	.	.	.	.	.	.	Yuen2017	2-1416-004	FAM_2-1416-004	MPX	2-1416-002	2-1275-005	M		NA	NA
801	12180.s1||10_11160856_C_T	genome	control	control	10_11160856_C_T	10	11160856	C	T	10659	CELF2	+	intron	SINE	1	intronic	CELF2	.	.	.	.	.	.	.	.	.	.	.	.	.	.	.	.	.	.	SSC	12180.s1	12180	simplex	12180.f1	12180.m1	female	.	515	382
802	AU4159301||10_11161835_C_A	genome	NDD	autism	10_11161835_C_A	10	11161835	C	A	10659	CELF2	+	intron			intronic	CELF2	.	.	.	.	.	.	.	.	.	.	.	.	.	.	.	.	.	.	Yuen2017	AU4159301	FAM_AU4159302	MPX	AU4159201	AU4159202	M		NA	NA
803	14198.p1||10_111629696_T_C	genome	NDD	autism	10_111629696_T_C	10	111629696	T	C	7511	XPNPEP1	-	intron			intronic	XPNPEP1	.	.	.	.	.	.	.	.	.	.	.	.	.	.	.	.	.	.	Turner_2017;SSC	14198.p1	;14198	;simplex	;14198.f1	;14198.m1	;male	;53	NA;321	NA;359
804	12375.p1||10_111644132_T_A	genome	NDD	autism	10_111644132_T_A	10	111644132	T	A	7511	XPNPEP1	-	intron			intronic	XPNPEP1	.	.	.	.	.	.	.	.	.	.	.	.	.	.	.	.	.	.	SSC	12375.p1	12375	simplex	12375.f1	12375.m1	male	93	575	397
805	12875.p1||10_11165014_A_G	genome	NDD	autism	10_11165014_A_G	10	11165014	A	G	10659	CELF2	+	intron			intronic	CELF2	.	.	.	.	.	.	.	.	.	.	.	.	.	.	.	.	.	.	Turner_2017;SSC	12875.p1	;12875	;simplex	;12875.f1	;12875.m1	;male	;79	NA;367	NA;357
806	13128.s1||10_111654960_T_G	genome	control	control	10_111654960_T_G	10	111654960	T	G	7511	XPNPEP1	-	intron			intronic	XPNPEP1	.	.	.	.	.	.	.	.	.	.	.	.	.	.	.	.	.	.	SSC	13128.s1	13128	simplex	13128.f1	13128.m1	male	.	430	435
807	13128.s1||10_111655260_G_C	genome	control	control	10_111655260_G_C	10	111655260	G	C	7511	XPNPEP1	-	intron			intronic	XPNPEP1	.	.	.	.	.	.	.	.	.	.	.	.	.	.	.	.	.	.	SSC	13128.s1	13128	simplex	13128.f1	13128.m1	male	.	430	435
808	12221.s1||10_111668977_C_T	genome	control	control	10_111668977_C_T	10	111668977	C	T	7511	XPNPEP1	-	intron	SINE	1	intronic	XPNPEP1	.	.	.	.	.	.	.	.	.	.	.	.	.	.	.	.	.	.	SSC	12221.s1	12221	simplex	12221.f1	12221.m1	female	.	418	430
809	11003.s1||10_111671088_T_G	genome	control	control	10_111671088_T_G	10	111671088	T	G	7511	XPNPEP1	-	intron	SINE	1	intronic	XPNPEP1	.	.	.	.	.	.	.	.	.	.	.	.	.	.	.	.	.	.	SSC	11003.s1	11003	simplex	11003.f1	11003.m1	female	.	560	508
810	14320.p1||10_111716189_T_C	genome	NDD	autism	10_111716189_T_C	10	111716189	T	C	100505933	LOC100505933	-	intron	LTR	1	ncRNA_intronic	ADD3-AS1	.	.	.	.	.	.	.	.	.	.	.	.	.	.	.	.	.	.	SSC	14320.p1	14320	simplex	14320.f1	14320.m1	female	38	481	425
811	13599.s1||10_111725183_G_A	genome	control	control	10_111725183_G_A	10	111725183	G	A	100505933	LOC100505933	-	intron			ncRNA_intronic	ADD3-AS1	.	.	.	.	.	.	.	.	.	.	.	.	.	.	.	.	.	.	SSC	13599.s1	13599	simplex	13599.f1	13599.m1	male	.	443	383
812	AU3368303||10_11172567_A_G	genome	NDD	autism	10_11172567_A_G	10	11172567	A	G	10659	CELF2	+	intron			intronic	CELF2	.	.	.	.	.	.	.	.	.	.	.	.	.	.	.	.	.	.	Yuen2017	AU3368303	FAM_AU3368303	MPX	AU3368201	AU3368202	M		NA	NA
813	12647.p1||10_111738027_C_G	genome	NDD	autism	10_111738027_C_G	10	111738027	C	G	100505933	LOC100505933	-	intron	LINE	1	ncRNA_intronic	ADD3-AS1	.	.	.	.	.	.	.	.	.	.	.	.	.	.	.	.	.	.	SSC	12647.p1	12647	simplex	12647.f1	12647.m1	male	73	550	422
814	22017.p1||10_111762467_T_A	genome	NDD	autism	10_111762467_T_A	10	111762467	T	A	100505933	LOC100505933	-	intron			ncRNA_intronic	ADD3-AS1	.	.	.	.	.	.	.	.	.	.	.	.	.	.	.	.	.	.	SSC	22017.p1	KOR-017	simplex	KOR-017.f1	KOR-017.m1	male		387	330
815	11092.p1||10_111773205_G_A	genome	NDD	autism	10_111773205_G_A	10	111773205	G	A	120	ADD3	+	intron			intronic	ADD3	.	.	.	.	.	.	.	.	.	.	.	.	.	.	.	.	.	.	SSC	11092.p1	11092	simplex	11092.f1	11092.m1	male	125	348	301
816	12497.s1||10_111777129_A_G	genome	control	control	10_111777129_A_G	10	111777129	A	G	120	ADD3	+	intron			intronic	ADD3	.	.	.	.	.	.	.	.	.	.	.	.	.	.	.	.	.	.	Turner_2017;SSC	12497.s1	;12497	;simplex	;12497.f1	;12497.m1	;female	;.	NA;368	NA;372
817	11114.p1||10_11177979_A_G	genome	NDD	autism	10_11177979_A_G	10	11177979	A	G	10659	CELF2	+	intron	LINE	1	intronic	CELF2	.	.	.	.	.	.	.	.	.	.	.	.	.	.	.	.	.	.	SSC	11114.p1	11114	simplex	11114.f1	11114.m1	female	45	345	306
818	13058.p1||10_111780612_C_T	genome	NDD	autism	10_111780612_C_T	10	111780612	C	T	120	ADD3	+	intron	LINE	1	intronic	ADD3	.	.	.	.	.	.	.	.	.	.	.	.	.	.	.	.	.	.	SSC	13058.p1	13058	simplex	13058.f1	13058.m1	male	108	402	398
819	14344.p1||10_111792149_A_T	genome	NDD	autism	10_111792149_A_T	10	111792149	A	T	120	ADD3	+	intron			intronic	ADD3	.	.	.	.	.	.	.	.	.	.	.	.	.	.	.	.	.	.	SSC	14344.p1	14344	simplex	14344.f1	14344.m1	male	116	266	270
820	13583.s1||10_111803623_A_G	genome	control	control	10_111803623_A_G	10	111803623	A	G	120	ADD3	+	intron			intronic	ADD3	.	.	.	.	.	.	.	.	.	.	.	.	.	.	.	.	.	.	Turner_2017;SSC	13583.s1	;13583	;simplex	;13583.f1	;13583.m1	;female	;.	NA;498	NA;389
821	13998.p1||10_1118115_G_A	genome	NDD	autism	10_1118115_G_A	10	1118115	G	A	22884	WDR37	+	CDS			exonic	WDR37	.	nonsynonymous SNV	WDR37:NM_014023:exon2:c.G20A:p.S7N	T	B	B	D	D	L	T	N	T	T	T	D	23.4	0.098	0.981	SSC	13998.p1	13998	simplex	13998.f1	13998.m1	male	89	448	378
822	2-0244-003||10_111833191_T_G	genome	NDD	autism	10_111833191_T_G	10	111833191	T	G	120	ADD3	+	intron	SINE	1	intronic	ADD3	.	.	.	.	.	.	.	.	.	.	.	.	.	.	.	.	.	.	Yuen2017	2-0244-003	FAM_2-0244-004	MPX	2-0244-002	2-0244-001	M		NA	NA
823	13066.p1||10_111840041_A_T	genome	NDD	autism	10_111840041_A_T	10	111840041	A	T	120	ADD3	+	intron	SINE	1	intronic	ADD3	.	.	.	.	.	.	.	.	.	.	.	.	.	.	.	.	.	.	Turner_2017;SSC	13066.p1	;13066	;simplex	;13066.f1	;13066.m1	;male	;121	NA;424	NA;435
824	1-0520-003||10_111840696_A_G	genome	NDD	autism	10_111840696_A_G	10	111840696	A	G	120	ADD3	+	intron			intronic	ADD3	.	.	.	.	.	.	.	.	.	.	.	.	.	.	.	.	.	.	Yuen2016	1-0520-003	FAM_1-0520-003	SPX	1-0520-002	1-0520-001	M		NA	NA
825	14175.s1||10_111849278_C_T	genome	control	control	10_111849278_C_T	10	111849278	C	T	120	ADD3	+	intron			intronic	ADD3	.	.	.	.	.	.	.	.	.	.	.	.	.	.	.	.	.	.	SSC	14175.s1	14175	simplex	14175.f1	14175.m1	female	.	327	310
826	14682.p1||10_111858473_C_T	genome	NDD	autism	10_111858473_C_T	10	111858473	C	T	120	ADD3	+	intron	SINE	1	intronic	ADD3	.	.	.	.	.	.	.	.	.	.	.	.	.	.	.	.	.	.	SSC	14682.p1	14682	simplex	14682.f1	14682.m1	female	102	321	377
827	2-0197-004||10_11186159_C_T	genome	NDD	autism	10_11186159_C_T	10	11186159	C	T	10659	CELF2	+	intron			intronic	CELF2	.	.	.	.	.	.	.	.	.	.	.	.	.	.	.	.	.	.	Yuen2017	2-0197-004	FAM_2-0197-004	MPX	2-0197-002	2-0197-001	M		NA	NA
828	13311.s1||10_11186168_G_A	genome	control	control	10_11186168_G_A	10	11186168	G	A	10659	CELF2	+	intron			intronic	CELF2	.	.	.	.	.	.	.	.	.	.	.	.	.	.	.	.	.	.	SSC	13311.s1	13311	simplex	13311.f1	13311.m1	female	.	481	464
829	14040.s1||10_111862683_C_T	genome	control	control	10_111862683_C_T	10	111862683	C	T	120	ADD3	+	intron			intronic	ADD3	.	.	.	.	.	.	.	.	.	.	.	.	.	.	.	.	.	.	SSC	14040.s1	14040	simplex	14040.f1	14040.m1	female	.	367	384
830	13546.p1||10_111866759_C_T	genome	NDD	autism	10_111866759_C_T	10	111866759	C	T	120	ADD3	+	intron			intronic	ADD3	.	.	.	.	.	.	.	.	.	.	.	.	.	.	.	.	.	.	Turner_2017;SSC	13546.p1	;13546	;simplex	;13546.f1	;13546.m1	;male	;75	NA;463	NA;337
831	12536.p1||10_111867147_T_G	genome	NDD	autism	10_111867147_T_G	10	111867147	T	G	120	ADD3	+	intron	LINE	1	intronic	ADD3	.	.	.	.	.	.	.	.	.	.	.	.	.	.	.	.	.	.	SSC	12536.p1	12536	simplex	12536.f1	12536.m1	male	90	441	382
832	11000.p1||10_111870782_C_T	genome	NDD	autism	10_111870782_C_T	10	111870782	C	T	120	ADD3	+	intron	LTR	1	intronic	ADD3	.	.	.	.	.	.	.	.	.	.	.	.	.	.	.	.	.	.	Turner2016;SSC	11000.p1	;11000	;simplex	;11000.f1	;11000.m1	;male	;78	NA;440	NA;426
833	13016.s1||10_111871189_G_A	genome	control	control	10_111871189_G_A	10	111871189	G	A	120	ADD3	+	intron			intronic	ADD3	.	.	.	.	.	.	.	.	.	.	.	.	.	.	.	.	.	.	SSC	13016.s1	13016	simplex	13016.f1	13016.m1	female	.	465	354
834	7-0149-003||10_111871229_C_T	genome	NDD	autism	10_111871229_C_T	10	111871229	C	T	120	ADD3	+	intron			intronic	ADD3	.	.	.	.	.	.	.	.	.	.	.	.	.	.	.	.	.	.	Yuen2017	7-0149-003	FAM_7-0149-003	SPX	7-0149-002	7-0149-001	M		NA	NA
835	13552.p1||10_111871519_C_T	genome	NDD	autism	10_111871519_C_T	10	111871519	C	T	120	ADD3	+	intron	SINE	1	intronic	ADD3	.	.	.	.	.	.	.	.	.	.	.	.	.	.	.	.	.	.	SSC	13552.p1	13552	simplex	13552.f1	13552.m1	male	66	423	407
836	2-1296-003||10_111871855_G_A	genome	NDD	autism	10_111871855_G_A	10	111871855	G	A	120	ADD3	+	intron			intronic	ADD3	.	.	.	.	.	.	.	.	.	.	.	.	.	.	.	.	.	.	Yuen2017	2-1296-003	FAM_2-1296-003	SPX	2-1296-002	2-1296-001	M		NA	NA
837	14479.p1||10_111872668_C_A	genome	NDD	autism	10_111872668_C_A	10	111872668	C	A	120	ADD3	+	CDS			exonic	ADD3	.	nonsynonymous SNV	ADD3:NM_001121:exon3:c.C329A:p.P110H,ADD3:NM_001320592:exon3:c.C329A:p.P110H,ADD3:NM_001320593:exon3:c.C329A:p.P110H,ADD3:NM_016824:exon3:c.C329A:p.P110H,ADD3:NM_019903:exon3:c.C329A:p.P110H,ADD3:NM_001320591:exon4:c.C329A:p.P110H,ADD3:NM_001320594:exon4:c.C95A:p.P32H	T	D	P	D	D	L	T	N	T	T	T	D	29.2	0.925	0.997	Turner_2017;SSC	14479.p1	;14479	;simplex	;14479.f1	;14479.m1	;male	;108	NA;371	NA;343
838	11575.p1||10_11187470_G_A	genome	NDD	autism	10_11187470_G_A	10	11187470	G	A	10659	CELF2	+	intron			intronic	CELF2	.	.	.	.	.	.	.	.	.	.	.	.	.	.	.	.	.	.	SSC	11575.p1	11575	simplex	11575.f1	11575.m1	male	105	395	333
839	12796.s1||10_111879999_C_G	genome	control	control	10_111879999_C_G	10	111879999	C	G	120	ADD3	+	intron	LINE	1	intronic	ADD3	.	.	.	.	.	.	.	.	.	.	.	.	.	.	.	.	.	.	Turner_2017	12796.s1							NA	NA
840	14547.s1||10_111882047_C_A	genome	control	control	10_111882047_C_A	10	111882047	C	A	120	ADD3	+	CDS			exonic	ADD3	.	nonsynonymous SNV	ADD3:NM_001121:exon9:c.C1140A:p.N380K,ADD3:NM_001320592:exon9:c.C1140A:p.N380K,ADD3:NM_001320593:exon9:c.C1140A:p.N380K,ADD3:NM_016824:exon9:c.C1140A:p.N380K,ADD3:NM_019903:exon9:c.C1140A:p.N380K,ADD3:NM_001320591:exon10:c.C1140A:p.N380K,ADD3:NM_001320594:exon10:c.C906A:p.N302K	D	P	P	D	D	M	T	D	T	T	D	D	26.2	-0.249	0.994	Turner_2017;SSC	14547.s1	;14547	;simplex	;14547.f1	;14547.m1	;male	;.	NA;399	NA;354
841	AU066403||10_111886326_A_C	genome	NDD	autism	10_111886326_A_C	10	111886326	A	C	120	ADD3	+	intron			intronic	ADD3	.	.	.	.	.	.	.	.	.	.	.	.	.	.	.	.	.	.	Yuen2017	AU066403	FAM_AU066404	MPX	AU066402	AU066401	M		NA	NA
842	1-0985-003||10_11191397_T_C	genome	NDD	autism	10_11191397_T_C	10	11191397	T	C	10659	CELF2	+	intron			intronic	CELF2	.	.	.	.	.	.	.	.	.	.	.	.	.	.	.	.	.	.	Yuen2017	1-0985-003	FAM_1-0985-003	SPX	1-0985-002	1-0985-001	M		NA	NA
843	12739.s1||10_11191567_C_T	genome	control	control	10_11191567_C_T	10	11191567	C	T	10659	CELF2	+	intron			intronic	CELF2	.	.	.	.	.	.	.	.	.	.	.	.	.	.	.	.	.	.	Turner_2017;SSC	12739.s1	;12739	;simplex	;12739.f1	;12739.m1	;male	;.	NA;365	NA;356
844	12565.p1||10_111967847_T_C	genome	NDD	autism	10_111967847_T_C	10	111967847	T	C	4601	MXI1	+	intron			intronic	MXI1	.	.	.	.	.	.	.	.	.	.	.	.	.	.	.	.	.	.	SSC	12565.p1	12565	simplex	12565.f1	12565.m1	female	79	353	346
845	14370.p1||10_111973470_C_T	genome	NDD	autism	10_111973470_C_T	10	111973470	C	T	4601	MXI1	+	intron			intronic	MXI1	.	.	.	.	.	.	.	.	.	.	.	.	.	.	.	.	.	.	Turner_2017;SSC	14370.p1	;14370	;simplex	;14370.f1	;14370.m1	;male	;73	NA;686	NA;469
846	1-0971-003||10_111974697_A_G	genome	NDD	autism	10_111974697_A_G	10	111974697	A	G	4601	MXI1	+	intron			intronic	MXI1	.	.	.	.	.	.	.	.	.	.	.	.	.	.	.	.	.	.	Yuen2017	1-0971-003	FAM_1-0971-003	SPX	1-0971-002	1-0971-001	M		NA	NA
847	13898.s1||10_111977360_T_C	genome	control	control	10_111977360_T_C	10	111977360	T	C	4601	MXI1	+	intron			intronic	MXI1	.	.	.	.	.	.	.	.	.	.	.	.	.	.	.	.	.	.	SSC	13898.s1	13898	simplex	13898.f1	13898.m1	male	.	377	375
848	13881.s1||10_111980505_C_G	genome	control	control	10_111980505_C_G	10	111980505	C	G	4601	MXI1	+	intron	LINE	1	intronic	MXI1	.	.	.	.	.	.	.	.	.	.	.	.	.	.	.	.	.	.	SSC	13881.s1	13881	simplex	13881.f1	13881.m1	female	.	561	449
849	14428.s1||10_111980831_C_T	genome	control	control	10_111980831_C_T	10	111980831	C	T	4601	MXI1	+	intron			intronic	MXI1	.	.	.	.	.	.	.	.	.	.	.	.	.	.	.	.	.	.	SSC	14428.s1	14428	simplex	14428.f1	14428.m1	female	.	372	403
850	12225.s1||10_111989623_A_G	genome	control	control	10_111989623_A_G	10	111989623	A	G	4601	MXI1	+	intron			intronic	MXI1	.	.	.	.	.	.	.	.	.	.	.	.	.	.	.	.	.	.	Turner_2017;SSC	12225.s1	;12225	;simplex	;12225.f1	;12225.m1	;male	;.	NA;428	NA;400
851	14406.s1||10_111993140_A_G	genome	control	control	10_111993140_A_G	10	111993140	A	G	4601	MXI1	+	intron			intronic	MXI1	.	.	.	.	.	.	.	.	.	.	.	.	.	.	.	.	.	.	SSC	14406.s1	14406	simplex	14406.f1	14406.m1	male	.	340	346
852	11225.s1||10_111993379_A_G	genome	control	control	10_111993379_A_G	10	111993379	A	G	4601	MXI1	+	intron			intronic	MXI1	.	.	.	.	.	.	.	.	.	.	.	.	.	.	.	.	.	.	SSC	11225.s1	11225	simplex	11225.f1	11225.m1	female	.	455	352
853	13564.p1||10_11199340_A_T	genome	NDD	autism	10_11199340_A_T	10	11199340	A	T	10659	CELF2	+	intron			intronic	CELF2	.	.	.	.	.	.	.	.	.	.	.	.	.	.	.	.	.	.	Turner_2017;SSC	13564.p1	;13564	;simplex	;13564.f1	;13564.m1	;male	;119	NA;466	NA;432
854	14370.p1||10_111994916_G_A	genome	NDD	autism	10_111994916_G_A	10	111994916	G	A	4601	MXI1	+	intron			intronic	MXI1	.	.	.	.	.	.	.	.	.	.	.	.	.	.	.	.	.	.	Turner_2017	14370.p1							NA	NA
855	13522.s1||10_111997779_C_A	genome	control	control	10_111997779_C_A	10	111997779	C	A	4601	MXI1	+	intron	LTR	1	intronic	MXI1	.	.	.	.	.	.	.	.	.	.	.	.	.	.	.	.	.	.	SSC	13522.s1	13522	simplex	13522.f1	13522.m1	male	.	387	318
856	13934.s1||10_111999094_A_G	genome	control	control	10_111999094_A_G	10	111999094	A	G	4601	MXI1	+	intron	LINE	1	intronic	MXI1	.	.	.	.	.	.	.	.	.	.	.	.	.	.	.	.	.	.	SSC	13934.s1	13934	simplex	13934.f1	13934.m1	female	.	481	512
857	14449.p1||10_112001745_T_G	genome	NDD	autism	10_112001745_T_G	10	112001745	T	G	4601	MXI1	+	intron	SINE	1	intronic	MXI1	.	.	.	.	.	.	.	.	.	.	.	.	.	.	.	.	.	.	SSC	14449.p1	14449	simplex	14449.f1	14449.m1	female	65	404	404
858	12424.s1||10_112005516_G_C	genome	control	control	10_112005516_G_C	10	112005516	G	C	4601	MXI1	+	exon_unclassified	LINE	1	intronic	MXI1	.	.	.	.	.	.	.	.	.	.	.	.	.	.	.	.	.	.	Turner_2017;SSC	12424.s1	;12424	;simplex	;12424.f1	;12424.m1	;female	;.	NA;415	NA;378
859	12304.p1||10_112029354_G_A	genome	NDD	autism	10_112029354_G_A	10	112029354	G	A	4601	MXI1	+	intron			intronic	MXI1	.	.	.	.	.	.	.	.	.	.	.	.	.	.	.	.	.	.	Turner_2017;SSC	12304.p1	;12304	;simplex	;12304.f1	;12304.m1	;male	;83	NA;346	NA;398
860	gonl-8c||10_112037422_C_T	genome	control	control	10_112037422_C_T	10	112037422	C	T	4601	MXI1	+	intron	SINE?	1	intronic	MXI1	.	.	.	.	.	.	.	.	.	.	.	.	.	.	.	.	.	.	GONL	gonl-8c							NA	NA
861	1-0469-005||10_11216378_A_G	genome	NDD	autism	10_11216378_A_G	10	11216378	A	G	10659	CELF2	+	intron			intronic	CELF2	.	.	.	.	.	.	.	.	.	.	.	.	.	.	.	.	.	.	Yuen2017	1-0469-005	FAM_1-0469-005	MPX	1-0469-002	1-0469-001	M		NA	NA
862	13106.s1||10_11220332_G_A	genome	control	control	10_11220332_G_A	10	11220332	G	A	10659	CELF2	+	intron			intronic	CELF2	.	.	.	.	.	.	.	.	.	.	.	.	.	.	.	.	.	.	SSC	13106.s1	13106	simplex	13106.f1	13106.m1	female	.	398	400
863	2-0713-003||10_112258467_C_T	genome	NDD	autism	10_112258467_C_T	10	112258467	C	T	1847	DUSP5	+	intron			intronic	DUSP5	.	.	.	.	.	.	.	.	.	.	.	.	.	.	.	.	.	.	Yuen2017	2-0713-003	FAM_2-0713-003	SPX	2-0713-002	2-0713-001	M		NA	NA
864	gonl-232c||10_112266973_C_A	genome	control	control	10_112266973_C_A	10	112266973	C	A	1847	DUSP5	+	intron			intronic	DUSP5	.	.	.	.	.	.	.	.	.	.	.	.	.	.	.	.	.	.	GONL	gonl-232c							NA	NA
865	NCS3.p1||10_112330843_T_C	genome	NDD	autism	10_112330843_T_C	10	112330843	T	C	9126	SMC3	+	intron	LINE	1	intronic	SMC3	.	.	.	.	.	.	.	.	.	.	.	.	.	.	.	.	.	.	Turner2016	NCS3.p1							NA	NA
866	14617.p1||10_112346205_A_G	genome	NDD	autism	10_112346205_A_G	10	112346205	A	G	9126	SMC3	+	intron			intronic	SMC3	.	.	.	.	.	.	.	.	.	.	.	.	.	.	.	.	.	.	SSC	14617.p1	14617	simplex	14617.f1	14617.m1	male	75	440	479
867	14132.p1||10_112346761_C_T	genome	NDD	autism	10_112346761_C_T	10	112346761	C	T	9126	SMC3	+	intron			intronic	SMC3	.	.	.	.	.	.	.	.	.	.	.	.	.	.	.	.	.	.	SSC	14132.p1	14132	simplex	14132.f1	14132.m1	male	95	491	475
868	13993.p1||10_11235829_C_G	genome	NDD	autism	10_11235829_C_G	10	11235829	C	G	10659	CELF2	+	intron	SINE	1	intronic	CELF2	.	.	.	.	.	.	.	.	.	.	.	.	.	.	.	.	.	.	SSC	13993.p1	13993	simplex	13993.f1	13993.m1	male	45	564	415
869	11519.p1||10_112359556_C_T	genome	NDD	autism	10_112359556_C_T	10	112359556	C	T	9126	SMC3	+	CDS			exonic	SMC3	.	nonsynonymous SNV	SMC3:NM_005445:exon21:c.C2413T:p.R805C	D	D	D	D	D	L	T	D	D	D	D	D	34	0.892	0.996	SSC	11519.p1	11519	simplex	11519.f1	11519.m1	male	84	346	330
870	AU3862305||10_112361866_A_T	genome	NDD	autism	10_112361866_A_T	10	112361866	A	T	9126	SMC3	+	CDS			exonic	SMC3	.	nonsynonymous SNV	SMC3:NM_005445:exon25:c.A3035T:p.K1012I	D	P	B	D	D	L	T	D	T	T	D	D	25.4	1.14	0.954	Yuen2017	AU3862305	FAM_AU3862305	MPX	AU3862201	AU3862202	M		NA	NA
871	14239.s1||10_112409222_G_A	genome	control	control	10_112409222_G_A	10	112409222	G	A	282996	RBM20	+	intron			intronic	RBM20	.	.	.	.	.	.	.	.	.	.	.	.	.	.	.	.	.	.	SSC	14239.s1	14239	simplex	14239.f1	14239.m1	female	.	331	358
872	13993.p1||10_11241124_C_G	genome	NDD	autism	10_11241124_C_G	10	11241124	C	G	10659	CELF2	+	intron			intronic	CELF2	.	.	.	.	.	.	.	.	.	.	.	.	.	.	.	.	.	.	SSC	13993.p1	13993	simplex	13993.f1	13993.m1	male	45	564	415
873	5-0054-003||10_112420370_T_C	genome	NDD	autism	10_112420370_T_C	10	112420370	T	C	282996	RBM20	+	intron	DNA	1	intronic	RBM20	.	.	.	.	.	.	.	.	.	.	.	.	.	.	.	.	.	.	Yuen2017	5-0054-003	FAM_5-0054-003	SPX	5-0054-002	5-0054-001	M		NA	NA
874	13165.s1||10_112423915_C_A	genome	control	control	10_112423915_C_A	10	112423915	C	A	282996	RBM20	+	intron	LINE	1	intronic	RBM20	.	.	.	.	.	.	.	.	.	.	.	.	.	.	.	.	.	.	SSC	13165.s1	13165	simplex	13165.f1	13165.m1	male	.	334	368
875	AU4070301||10_112437656_A_G	genome	NDD	autism	10_112437656_A_G	10	112437656	A	G	282996	RBM20	+	intron			intronic	RBM20	.	.	.	.	.	.	.	.	.	.	.	.	.	.	.	.	.	.	Yuen2017	AU4070301	FAM_AU4070301	SPX	AU4070201	AU4070202	M		NA	NA
876	14637.s1||10_112441683_T_A	genome	control	control	10_112441683_T_A	10	112441683	T	A	282996	RBM20	+	intron	SINE	1	intronic	RBM20	.	.	.	.	.	.	.	.	.	.	.	.	.	.	.	.	.	.	Turner_2017;SSC	14637.s1	;14637	;simplex	;14637.f1	;14637.m1	;female	;.	NA;450	NA;427
877	12252.s1||10_112442534_C_T	genome	control	control	10_112442534_C_T	10	112442534	C	T	282996	RBM20	+	intron	LINE	1	intronic	RBM20	.	.	.	.	.	.	.	.	.	.	.	.	.	.	.	.	.	.	Turner_2017;SSC	12252.s1	;12252	;simplex	;12252.f1	;12252.m1	;male	;.	NA;434	NA;399
878	14245.p1||10_112446256_G_T	genome	NDD	autism	10_112446256_G_T	10	112446256	G	T	282996	RBM20	+	intron	SINE	1	intronic	RBM20	.	.	.	.	.	.	.	.	.	.	.	.	.	.	.	.	.	.	SSC	14245.p1	14245	simplex	14245.f1	14245.m1	female	74	388	396
879	14295.s1||10_112458612_G_T	genome	control	control	10_112458612_G_T	10	112458612	G	T	282996	RBM20	+	intron			intronic	RBM20	.	.	.	.	.	.	.	.	.	.	.	.	.	.	.	.	.	.	SSC	14295.s1	14295	simplex	14295.f1	14295.m1	male	.	234	225
880	2-0198-003||10_112461917_T_C	genome	NDD	autism	10_112461917_T_C	10	112461917	T	C	282996	RBM20	+	intron			intronic	RBM20	.	.	.	.	.	.	.	.	.	.	.	.	.	.	.	.	.	.	Yuen2017	2-0198-003	FAM_2-0198-005	MPX	2-0198-002	2-0198-001	M		NA	NA
881	AU3692302||10_112463690_C_T	genome	NDD	autism	10_112463690_C_T	10	112463690	C	T	282996	RBM20	+	intron	SINE	1	intronic	RBM20	.	.	.	.	.	.	.	.	.	.	.	.	.	.	.	.	.	.	Yuen2017	AU3692302	FAM_AU3692302	MPX	AU3692201	AU3692202	F		NA	NA
882	2-1368-003||10_11246378_C_A	genome	NDD	autism	10_11246378_C_A	10	11246378	C	A	10659	CELF2	+	intron			intronic	CELF2	.	.	.	.	.	.	.	.	.	.	.	.	.	.	.	.	.	.	Yuen2016	2-1368-003	FAM_2-1368-003	SPX	2-1368-002	2-1368-001	F		NA	NA
883	2-0003-003||10_112471457_C_T	genome	NDD	autism	10_112471457_C_T	10	112471457	C	T	282996	RBM20	+	intron			intronic	RBM20	.	.	.	.	.	.	.	.	.	.	.	.	.	.	.	.	.	.	Yuen2017	2-0003-003	FAM_2-0003-004	MPX	2-0003-002	2-0003-001	M		NA	NA
884	11089.p1||10_112472473_T_G	genome	NDD	autism	10_112472473_T_G	10	112472473	T	G	282996	RBM20	+	intron	SINE	1	intronic	RBM20	.	.	.	.	.	.	.	.	.	.	.	.	.	.	.	.	.	.	Turner_2017;SSC	11089.p1	;11089	;simplex	;11089.f1	;11089.m1	;male	;41	NA;559	NA;419
885	13961.p1||10_11247359_A_G	genome	NDD	autism	10_11247359_A_G	10	11247359	A	G	10659	CELF2	+	intron			intronic	CELF2	.	.	.	.	.	.	.	.	.	.	.	.	.	.	.	.	.	.	Turner_2017;SSC	13961.p1	;13961	;simplex	;13961.f1	;13961.m1	;male	;64	NA;414	NA;322
886	AU3907302||10_112478462_G_A	genome	NDD	autism	10_112478462_G_A	10	112478462	G	A	282996	RBM20	+	intron	SINE	1	intronic	RBM20	.	.	.	.	.	.	.	.	.	.	.	.	.	.	.	.	.	.	Yuen2017	AU3907302	FAM_AU3907302	MPX	AU3907201	AU3907202	M		NA	NA
887	12603.p1||10_112485656_T_G	genome	NDD	autism	10_112485656_T_G	10	112485656	T	G	282996	RBM20	+	intron			intronic	RBM20	.	.	.	.	.	.	.	.	.	.	.	.	.	.	.	.	.	.	SSC	12603.p1	12603	simplex	12603.f1	12603.m1	male	26	457	462
888	13515.s1||10_112487151_C_T	genome	control	control	10_112487151_C_T	10	112487151	C	T	282996	RBM20	+	intron			intronic	RBM20	.	.	.	.	.	.	.	.	.	.	.	.	.	.	.	.	.	.	Turner2016	13515.s1							NA	NA
889	11277.p1||10_112487422_G_A	genome	NDD	autism	10_112487422_G_A	10	112487422	G	A	282996	RBM20	+	intron	LINE	1	intronic	RBM20	.	.	.	.	.	.	.	.	.	.	.	.	.	.	.	.	.	.	SSC	11277.p1	11277	simplex	11277.f1	11277.m1	female	45	472	362
890	13526.s1||10_112489924_G_A	genome	control	control	10_112489924_G_A	10	112489924	G	A	282996	RBM20	+	intron			intronic	RBM20	.	.	.	.	.	.	.	.	.	.	.	.	.	.	.	.	.	.	SSC	13526.s1	13526	simplex	13526.f1	13526.m1	male	.	449	415
891	14150.s1||10_112492814_T_C	genome	control	control	10_112492814_T_C	10	112492814	T	C	282996	RBM20	+	intron			intronic	RBM20	.	.	.	.	.	.	.	.	.	.	.	.	.	.	.	.	.	.	Turner_2017;SSC	14150.s1	;14150	;simplex	;14150.f1	;14150.m1	;male	;.	NA;380	NA;306
892	5-0050-003||10_112494868_A_G	genome	NDD	autism	10_112494868_A_G	10	112494868	A	G	282996	RBM20	+	intron	DNA	1	intronic	RBM20	.	.	.	.	.	.	.	.	.	.	.	.	.	.	.	.	.	.	Yuen2017	5-0050-003	FAM_5-0050-004	MPX	5-0050-002	5-0050-001	M		NA	NA
893	13589.p1||10_112501662_C_T	genome	NDD	autism	10_112501662_C_T	10	112501662	C	T	282996	RBM20	+	intron			intronic	RBM20	.	.	.	.	.	.	.	.	.	.	.	.	.	.	.	.	.	.	SSC	13589.p1	13589	simplex	13589.f1	13589.m1	male	50	395	306
894	2-0019-004||10_112510243_G_T	genome	NDD	autism	10_112510243_G_T	10	112510243	G	T	282996	RBM20	+	intron			intronic	RBM20	.	.	.	.	.	.	.	.	.	.	.	.	.	.	.	.	.	.	Yuen2017	2-0019-004	FAM_2-0019-004	MPX	2-0019-002	2-0019-001	M		NA	NA
895	14236.p1||10_112511272_C_T	genome	NDD	autism	10_112511272_C_T	10	112511272	C	T	282996	RBM20	+	intron	LTR	1	intronic	RBM20	.	.	.	.	.	.	.	.	.	.	.	.	.	.	.	.	.	.	Turner_2017;SSC	14236.p1	;14236	;simplex	;14236.f1	;14236.m1	;male	;108	NA;302	NA;299
896	11964.s1||10_112514287_T_A	genome	control	control	10_112514287_T_A	10	112514287	T	A	282996	RBM20	+	intron	LINE	1	intronic	RBM20	.	.	.	.	.	.	.	.	.	.	.	.	.	.	.	.	.	.	SSC	11964.s1	11964	simplex	11964.f1	11964.m1	female	.	411	398
897	11765.s1||10_112516380_T_C	genome	control	control	10_112516380_T_C	10	112516380	T	C	282996	RBM20	+	exon_unclassified	RNA	1	intronic	RBM20	.	.	.	.	.	.	.	.	.	.	.	.	.	.	.	.	.	.	SSC	11765.s1	11765	simplex	11765.f1	11765.m1	female	.	518	489
898	13487.s1||10_112520072_C_T	genome	control	control	10_112520072_C_T	10	112520072	C	T	282996	RBM20	+	intron			intronic	RBM20	.	.	.	.	.	.	.	.	.	.	.	.	.	.	.	.	.	.	SSC	13487.s1	13487	simplex	13487.f1	13487.m1	female	.	440	427
899	11220.s1||10_112551605_C_A	genome	control	control	10_112551605_C_A	10	112551605	C	A	282996	RBM20	+	intron			intronic	RBM20	.	.	.	.	.	.	.	.	.	.	.	.	.	.	.	.	.	.	SSC	11220.s1	11220	simplex	11220.f1	11220.m1	female	.	338	324
900	13992.p1||10_112562812_C_T	genome	NDD	autism	10_112562812_C_T	10	112562812	C	T	282996	RBM20	+	intron			intronic	RBM20	.	.	.	.	.	.	.	.	.	.	.	.	.	.	.	.	.	.	SSC	13992.p1	13992	simplex	13992.f1	13992.m1	female	108	371	375
901	12875.p1||10_112570155_C_T	genome	NDD	autism	10_112570155_C_T	10	112570155	C	T	282996	RBM20	+	CDS			exonic	RBM20	.	synonymous SNV	RBM20:NM_001134363:exon8:c.C1815T:p.A605A	.	.	.	.	.	.	.	.	.	.	.	.	.	.	.	Turner_2017;SSC	12875.p1	;12875	;simplex	;12875.f1	;12875.m1	;male	;79	NA;367	NA;357
902	13961.s1||10_112573371_T_A	genome	control	control	10_112573371_T_A	10	112573371	T	A	282996	RBM20	+	intron	SINE	1	intronic	RBM20	.	.	.	.	.	.	.	.	.	.	.	.	.	.	.	.	.	.	Turner_2017	13961.s1							NA	NA
903	11339.p1||10_112595219_G_A	genome	NDD	autism	10_112595219_G_A	10	112595219	G	A	282996	RBM20	+	intron	SINE	1	intronic	RBM20	.	.	.	.	.	.	.	.	.	.	.	.	.	.	.	.	.	.	SSC	11339.p1	11339	simplex	11339.f1	11339.m1	female	62	380	425
904	AU2988302|AU2988303||10_11260750_A_T	genome	NDD	autism	10_11260750_A_T	10	11260750	A	T	10659	CELF2	+	intron			intronic	CELF2	.	.	.	.	.	.	.	.	.	.	.	.	.	.	.	.	.	.	Yuen2017	AU2988302|AU2988303	FAM_AU2988303	SPX	AU2988201	AU2988202	M		NA	NA
905	11024.s1||10_112639666_G_A	genome	control	control	10_112639666_G_A	10	112639666	G	A	27250	PDCD4	+	intron			intronic	PDCD4	.	.	.	.	.	.	.	.	.	.	.	.	.	.	.	.	.	.	SSC	11024.s1	11024	simplex	11024.f1	11024.m1	female	.	340	327
906	12086.p1||10_112641530_C_T	genome	NDD	autism	10_112641530_C_T	10	112641530	C	T	27250	PDCD4	+	intron			intronic	PDCD4	.	.	.	.	.	.	.	.	.	.	.	.	.	.	.	.	.	.	Turner_2017	12086.p1							NA	NA
907	13301.s1||10_112650336_G_A	genome	control	control	10_112650336_G_A	10	112650336	G	A	27250	PDCD4	+	CDS			exonic	PDCD4	.	nonsynonymous SNV	PDCD4:NM_001199492:exon8:c.G856A:p.V286M,PDCD4:NM_014456:exon8:c.G898A:p.V300M,PDCD4:NM_145341:exon9:c.G865A:p.V289M	D	P	B	D	D	M	T	N	T	T	D	D	28.4	1.048	0.989	SSC	13301.s1	13301	simplex	13301.f1	13301.m1	male	.	492	398
908	13001.p1||10_112654610_T_C	genome	NDD	autism	10_112654610_T_C	10	112654610	T	C	27250	PDCD4	+	intron			intronic	PDCD4	.	.	.	.	.	.	.	.	.	.	.	.	.	.	.	.	.	.	Turner_2017;SSC	13001.p1	;13001	;simplex	;13001.f1	;13001.m1	;male	;91	NA;431	NA;433
909	14508.s1||10_112658802_G_A	genome	control	control	10_112658802_G_A	10	112658802	G	A	27250	PDCD4	+	3'UTR			UTR3	BBIP1;PDCD4	NM_001195305:c.*1316C>T;NM_001195306:c.*1316C>T;NM_001195304:c.*1440C>T;NM_001243783:c.*1316C>T;NM_001195307:c.*1316C>T;NM_014456:c.*956G>A;NM_145341:c.*956G>A;NM_001199492:c.*956G>A	.	.	.	.	.	.	.	.	.	.	.	.	.	.	.	.	.	SSC	14508.s1	14508	simplex	14508.f1	14508.m1	female	.	424	427
910	14107.s1||10_112670839_G_A	genome	control	control	10_112670839_G_A	10	112670839	G	A	92482	BBIP1	-	intron	SINE	1	intronic	BBIP1	.	.	.	.	.	.	.	.	.	.	.	.	.	.	.	.	.	.	SSC	14107.s1	14107	simplex	14107.f1	14107.m1	male	.	476	397
911	14219.s1||10_112673019_G_C	genome	control	control	10_112673019_G_C	10	112673019	G	C	92482	BBIP1	-	intron	SINE	1	intronic	BBIP1	.	.	.	.	.	.	.	.	.	.	.	.	.	.	.	.	.	.	SSC	14219.s1	14219	simplex	14219.f1	14219.m1	female	.	433	416
912	13626.s1||10_112681445_A_G	genome	control	control	10_112681445_A_G	10	112681445	A	G	8036	SHOC2	+	intron	LINE	1	intronic	SHOC2	.	.	.	.	.	.	.	.	.	.	.	.	.	.	.	.	.	.	SSC	13626.s1	13626	simplex	13626.f1	13626.m1	male	.	365	382
913	13259.p1||10_112695897_C_G	genome	NDD	autism	10_112695897_C_G	10	112695897	C	G	8036	SHOC2	+	intron	SINE	1	intronic	SHOC2	.	.	.	.	.	.	.	.	.	.	.	.	.	.	.	.	.	.	SSC	13259.p1	13259	simplex	13259.f1	13259.m1	male	91	248	264
914	22017.s1||10_112696243_T_G	genome	control	control	10_112696243_T_G	10	112696243	T	G	8036	SHOC2	+	intron	LINE	1	intronic	SHOC2	.	.	.	.	.	.	.	.	.	.	.	.	.	.	.	.	.	.	SSC	22017.s1	KOR-017	simplex	KOR-017.f1	KOR-017.m1	female		403	346
915	gonl-64c||10_112697086_A_G	genome	control	control	10_112697086_A_G	10	112697086	A	G	8036	SHOC2	+	intron			intronic	SHOC2	.	.	.	.	.	.	.	.	.	.	.	.	.	.	.	.	.	.	GONL	gonl-64c							NA	NA
916	13319.s1||10_112697833_G_A	genome	control	control	10_112697833_G_A	10	112697833	G	A	8036	SHOC2	+	intron			intronic	SHOC2	.	.	.	.	.	.	.	.	.	.	.	.	.	.	.	.	.	.	SSC	13319.s1	13319	simplex	13319.f1	13319.m1	male	.	301	280
917	11339.p1||10_11271511_C_T	genome	NDD	autism	10_11271511_C_T	10	11271511	C	T	10659	CELF2	+	intron	DNA	1	intronic	CELF2	.	.	.	.	.	.	.	.	.	.	.	.	.	.	.	.	.	.	SSC	11339.p1	11339	simplex	11339.f1	11339.m1	female	62	380	425
918	13874.s1||10_112715932_G_A	genome	control	control	10_112715932_G_A	10	112715932	G	A	8036	SHOC2	+	intron			intronic	SHOC2	.	.	.	.	.	.	.	.	.	.	.	.	.	.	.	.	.	.	Turner2016	13874.s1							NA	NA
919	12219.s1||10_112752159_A_G	genome	control	control	10_112752159_A_G	10	112752159	A	G	8036	SHOC2	+	intron			intronic	SHOC2	.	.	.	.	.	.	.	.	.	.	.	.	.	.	.	.	.	.	SSC	12219.s1	12219	simplex	12219.f1	12219.m1	female	.	475	402
920	11654.s1||10_11280413_C_G	genome	control	control	10_11280413_C_G	10	11280413	C	G	10659	CELF2	+	intron			intronic	CELF2	.	.	.	.	.	.	.	.	.	.	.	.	.	.	.	.	.	.	SSC	11654.s1	11654	simplex	11654.f1	11654.m1	female	.	382	378
921	11046.p1||10_1128112_G_A	genome	NDD	autism	10_1128112_G_A	10	1128112	G	A	22884	WDR37	+	intron			intronic	WDR37	.	.	.	.	.	.	.	.	.	.	.	.	.	.	.	.	.	.	SSC	11046.p1	11046	simplex	11046.f1	11046.m1	male	82	344	321
922	12295.p1||10_11281930_C_G	genome	NDD	autism	10_11281930_C_G	10	11281930	C	G	10659	CELF2	+	intron	SINE	1	intronic	CELF2	.	.	.	.	.	.	.	.	.	.	.	.	.	.	.	.	.	.	SSC	12295.p1	12295	simplex	12295.f1	12295.m1	male	110	355	337
923	11654.s1||10_11288072_C_T	genome	control	control	10_11288072_C_T	10	11288072	C	T	10659	CELF2	+	intron			intronic	CELF2	.	.	.	.	.	.	.	.	.	.	.	.	.	.	.	.	.	.	SSC	11654.s1	11654	simplex	11654.f1	11654.m1	female	.	382	378
924	14238.s1||10_11313258_A_C	genome	control	control	10_11313258_A_C	10	11313258	A	C	10659	CELF2	+	intron	LINE	1	intronic	CELF2	.	.	.	.	.	.	.	.	.	.	.	.	.	.	.	.	.	.	SSC	14238.s1	14238	simplex	14238.f1	14238.m1	male	.	334	308
925	AU2022302||10_1131597_C_T	genome	NDD	autism	10_1131597_C_T	10	1131597	C	T	22884	WDR37	+	intron			intronic	WDR37	.	.	.	.	.	.	.	.	.	.	.	.	.	.	.	.	.	.	Yuen2017	AU2022302	FAM_AU2022302	SPX	AU2022201	AU2022202	M		NA	NA
926	14305.s1||10_11318935_G_A	genome	control	control	10_11318935_G_A	10	11318935	G	A	10659	CELF2	+	intron			intronic	CELF2	.	.	.	.	.	.	.	.	.	.	.	.	.	.	.	.	.	.	SSC	14305.s1	14305	simplex	14305.f1	14305.m1	female	.	328	339
927	AU4033303||10_11322472_G_A	genome	NDD	autism	10_11322472_G_A	10	11322472	G	A	10659	CELF2	+	intron			intronic	CELF2	.	.	.	.	.	.	.	.	.	.	.	.	.	.	.	.	.	.	Yuen2017	AU4033303	FAM_AU4033305	SPX	AU4033201	AU4033202	F		NA	NA
928	14011.s1||10_11330451_C_T	genome	control	control	10_11330451_C_T	10	11330451	C	T	10659	CELF2	+	CDS			exonic	CELF2	.	synonymous SNV	CELF2:NM_001326346:exon7:c.C207T:p.A69A,CELF2:NM_001326333:exon8:c.C207T:p.A69A,CELF2:NM_001326338:exon8:c.C558T:p.A186A,CELF2:NM_001326339:exon8:c.C558T:p.A186A,CELF2:NM_001025076:exon9:c.C819T:p.A273A,CELF2:NM_001025077:exon9:c.C891T:p.A297A,CELF2:NM_001083591:exon9:c.C819T:p.A273A,CELF2:NM_001326329:exon9:c.C819T:p.A273A,CELF2:NM_001326330:exon9:c.C819T:p.A273A,CELF2:NM_001326331:exon9:c.C891T…	.	.	.	.	.	.	.	.	.	.	.	.	.	.	.	SSC	14011.s1	14011	simplex	14011.f1	14011.m1	female	.	422	422
929	12836.p1||10_11330581_C_T	genome	NDD	autism	10_11330581_C_T	10	11330581	C	T	10659	CELF2	+	intron			intronic	CELF2	.	.	.	.	.	.	.	.	.	.	.	.	.	.	.	.	.	.	SSC	12836.p1	12836	simplex	12836.f1	12836.m1	male	121	401	419
930	2-1421-003||10_11333136_A_C	genome	NDD	autism	10_11333136_A_C	10	11333136	A	C	10659	CELF2	+	intron			intronic	CELF2	.	.	.	.	.	.	.	.	.	.	.	.	.	.	.	.	.	.	Yuen2016	2-1421-003	FAM_2-1421-003	SPX	2-1421-002	2-1421-001	M		NA	NA
931	14111.p1||10_11342401_A_G	genome	NDD	autism	10_11342401_A_G	10	11342401	A	G	10659	CELF2	+	intron			intronic	CELF2	.	.	.	.	.	.	.	.	.	.	.	.	.	.	.	.	.	.	SSC	14111.p1	14111	simplex	14111.f1	14111.m1	female	89	465	476
932	12463.p1||10_1134548_A_G	genome	NDD	autism	10_1134548_A_G	10	1134548	A	G	22884	WDR37	+	intron	DNA	1	intronic	WDR37	.	.	.	.	.	.	.	.	.	.	.	.	.	.	.	.	.	.	SSC	12463.p1	12463	simplex	12463.f1	12463.m1	male	94	372	389
933	AU2458303||10_11348009_C_T	genome	NDD	autism	10_11348009_C_T	10	11348009	C	T	10659	CELF2	+	intron			intronic	CELF2	.	.	.	.	.	.	.	.	.	.	.	.	.	.	.	.	.	.	Yuen2017	AU2458303	FAM_AU2458303	MPX	AU2458201	AU2458202	M		NA	NA
934	11071.s1||10_11350199_A_G	genome	control	control	10_11350199_A_G	10	11350199	A	G	10659	CELF2	+	intron	LINE	1	intronic	CELF2	.	.	.	.	.	.	.	.	.	.	.	.	.	.	.	.	.	.	SSC	11071.s1	11071	simplex	11071.f1	11071.m1	female	.	351	359
935	AU2569301||10_11352970_C_T	genome	NDD	autism	10_11352970_C_T	10	11352970	C	T	10659	CELF2	+	intron	LINE	1	intronic	CELF2	.	.	.	.	.	.	.	.	.	.	.	.	.	.	.	.	.	.	Yuen2017	AU2569301	FAM_AU2569303	MPX	AU2569201	AU2569202	M		NA	NA
936	11267.s1||10_11374929_G_C	genome	control	control	10_11374929_G_C	10	11374929	G	C	10659	CELF2	+	3'UTR			ncRNA_intronic	CELF2-AS1	.	.	.	.	.	.	.	.	.	.	.	.	.	.	.	.	.	.	SSC	11267.s1	11267	simplex	11267.f1	11267.m1	male	.	503	471
937	14080.s1||10_11377912_G_A	genome	control	control	10_11377912_G_A	10	11377912	G	A	10659	CELF2	+	3'UTR			ncRNA_intronic	CELF2-AS1	.	.	.	.	.	.	.	.	.	.	.	.	.	.	.	.	.	.	SSC	14080.s1	14080	simplex	14080.f1	14080.m1	female	.	413	401
938	gonl-68c||10_113934312_T_C	genome	control	control	10_113934312_T_C	10	113934312	T	C	57678	GPAM	-	intron			intronic	GPAM	.	.	.	.	.	.	.	.	.	.	.	.	.	.	.	.	.	.	GONL	gonl-68c							NA	NA
939	14290.s1||10_113934878_G_T	genome	control	control	10_113934878_G_T	10	113934878	G	T	57678	GPAM	-	intron			intronic	GPAM	.	.	.	.	.	.	.	.	.	.	.	.	.	.	.	.	.	.	SSC	14290.s1	14290	simplex	14290.f1	14290.m1	female	.	433	380
940	13576.p1||10_114048129_C_T	genome	NDD	autism	10_114048129_C_T	10	114048129	C	T	6975	TECTB	+	intron			intronic	TECTB	.	.	.	.	.	.	.	.	.	.	.	.	.	.	.	.	.	.	Turner_2017;SSC	13576.p1	;13576	;simplex	;13576.f1	;13576.m1	;female	;40	NA;374	NA;332
941	14019.p1||10_114054259_C_T	genome	NDD	autism	10_114054259_C_T	10	114054259	C	T	6975	TECTB	+	intron			intronic	TECTB	.	.	.	.	.	.	.	.	.	.	.	.	.	.	.	.	.	.	SSC	14019.p1	14019	simplex	14019.f1	14019.m1	female	72	402	301
942	13738.s1||10_114056500_C_T	genome	control	control	10_114056500_C_T	10	114056500	C	T	6975	TECTB	+	intron			intronic	TECTB	.	.	.	.	.	.	.	.	.	.	.	.	.	.	.	.	.	.	Turner_2017;SSC	13738.s1	;13738	;simplex	;13738.f1	;13738.m1	;male	;.	NA;412	NA;410
943	13371.s1||10_114061923_G_A	genome	control	control	10_114061923_G_A	10	114061923	G	A	6975	TECTB	+	intron			intronic	TECTB	.	.	.	.	.	.	.	.	.	.	.	.	.	.	.	.	.	.	SSC	13371.s1	13371	simplex	13371.f1	13371.m1	female	.	356	375
944	14225.p1||10_114068509_A_C	genome	NDD	autism	10_114068509_A_C	10	114068509	A	C	390003	GUCY2GP	-	intron	SINE	1	ncRNA_intronic	GUCY2GP	.	.	.	.	.	.	.	.	.	.	.	.	.	.	.	.	.	.	SSC	14225.p1	14225	simplex	14225.f1	14225.m1	male	45	396	369
945	5-0003-004||10_114096165_T_C	genome	NDD	autism	10_114096165_T_C	10	114096165	T	C	390003	GUCY2GP	-	intron			ncRNA_intronic	GUCY2GP	.	.	.	.	.	.	.	.	.	.	.	.	.	.	.	.	.	.	Yuen2017	5-0003-004	FAM_5-0003-004	MPX	5-0003-002	5-0003-001	M		NA	NA
946	14418.p1||10_114098906_G_A	genome	NDD	autism	10_114098906_G_A	10	114098906	G	A	390003	GUCY2GP	-	exon_unclassified			ncRNA_exonic	GUCY2GP	.	.	.	.	.	.	.	.	.	.	.	.	.	.	.	.	.	.	SSC	14418.p1	14418	simplex	14418.f1	14418.m1	male	111	372	382
947	13057.s1||10_114143389_G_A	genome	control	control	10_114143389_G_A	10	114143389	G	A	51703	ACSL5	+	intron			intronic	ACSL5	.	.	.	.	.	.	.	.	.	.	.	.	.	.	.	.	.	.	SSC	13057.s1	13057	simplex	13057.f1	13057.m1	female	.	434	439
948	11300.s1||10_114145811_G_A	genome	control	control	10_114145811_G_A	10	114145811	G	A	51703	ACSL5	+	intron	LINE	1	intronic	ACSL5	.	.	.	.	.	.	.	.	.	.	.	.	.	.	.	.	.	.	SSC	11300.s1	11300	simplex	11300.f1	11300.m1	male	.	460	413
949	11892.s1||10_114147413_T_C	genome	control	control	10_114147413_T_C	10	114147413	T	C	51703	ACSL5	+	intron			intronic	ACSL5	.	.	.	.	.	.	.	.	.	.	.	.	.	.	.	.	.	.	SSC	11892.s1	11892	simplex	11892.f1	11892.m1	female	.	436	381
950	11012.s1||10_114152092_C_T	genome	control	control	10_114152092_C_T	10	114152092	C	T	51703	ACSL5	+	intron	SINE	1	intronic	ACSL5	.	.	.	.	.	.	.	.	.	.	.	.	.	.	.	.	.	.	Turner_2017	11012.s1							NA	NA
951	12478.p1||10_114170652_C_T	genome	NDD	autism	10_114170652_C_T	10	114170652	C	T	51703	ACSL5	+	intron			intronic	ACSL5	.	.	.	.	.	.	.	.	.	.	.	.	.	.	.	.	.	.	SSC	12478.p1	12478	simplex	12478.f1	12478.m1	male	74	388	355
952	13165.s1||10_114177030_G_A	genome	control	control	10_114177030_G_A	10	114177030	G	A	51703	ACSL5	+	intron	SINE	1	intronic	ACSL5	.	.	.	.	.	.	.	.	.	.	.	.	.	.	.	.	.	.	SSC	13165.s1	13165	simplex	13165.f1	13165.m1	male	.	334	368
953	2-1235-004||10_114177302_T_C	genome	NDD	autism	10_114177302_T_C	10	114177302	T	C	51703	ACSL5	+	intron			intronic	ACSL5	.	.	.	.	.	.	.	.	.	.	.	.	.	.	.	.	.	.	Yuen2017	2-1235-004	FAM_2-1235-004	MPX	2-1235-002	2-1235-001	M		NA	NA
954	12861.p1||10_114178258_T_G	genome	NDD	autism	10_114178258_T_G	10	114178258	T	G	51703	ACSL5	+	intron	SINE	1	intronic	ACSL5	.	.	.	.	.	.	.	.	.	.	.	.	.	.	.	.	.	.	SSC	12861.p1	12861	simplex	12861.f1	12861.m1	male	105	381	346
955	13540.s1||10_114220186_T_C	genome	control	control	10_114220186_T_C	10	114220186	T	C	143187	VTI1A	+	intron			intronic	VTI1A	.	.	.	.	.	.	.	.	.	.	.	.	.	.	.	.	.	.	SSC	13540.s1	13540	simplex	13540.f1	13540.m1	male	.	575	417
956	13015.p1||10_114222875_G_A	genome	NDD	autism	10_114222875_G_A	10	114222875	G	A	143187	VTI1A	+	intron	SINE	1	intronic	VTI1A	.	.	.	.	.	.	.	.	.	.	.	.	.	.	.	.	.	.	Turner_2017;SSC	13015.p1	;13015	;simplex	;13015.f1	;13015.m1	;male	;80	NA;394	NA;367
957	12565.p1||10_114231765_A_G	genome	NDD	autism	10_114231765_A_G	10	114231765	A	G	143187	VTI1A	+	intron			intronic	VTI1A	.	.	.	.	.	.	.	.	.	.	.	.	.	.	.	.	.	.	SSC	12565.p1	12565	simplex	12565.f1	12565.m1	female	79	353	346
958	12048.s1||10_114232345_G_A	genome	control	control	10_114232345_G_A	10	114232345	G	A	143187	VTI1A	+	intron			intronic	VTI1A	.	.	.	.	.	.	.	.	.	.	.	.	.	.	.	.	.	.	SSC	12048.s1	12048	simplex	12048.f1	12048.m1	female	.	401	352
959	11372.p1||10_114243832_C_T	genome	NDD	autism	10_114243832_C_T	10	114243832	C	T	143187	VTI1A	+	intron			intronic	VTI1A	.	.	.	.	.	.	.	.	.	.	.	.	.	.	.	.	.	.	SSC	11372.p1	11372	simplex	11372.f1	11372.m1	male	123	348	389
960	14258.p1||10_1142663_C_T	genome	NDD	autism	10_1142663_C_T	10	1142663	C	T	22884	WDR37	+	intron	LTR	1	intronic	WDR37	.	.	.	.	.	.	.	.	.	.	.	.	.	.	.	.	.	.	SSC	14258.p1	14258	simplex	14258.f1	14258.m1	male	33	364	316
961	7-0103-003||10_114290058_C_T	genome	NDD	autism	10_114290058_C_T	10	114290058	C	T	143187	VTI1A	+	intron			intronic	VTI1A	.	.	.	.	.	.	.	.	.	.	.	.	.	.	.	.	.	.	Yuen2017	7-0103-003	FAM_7-0103-003	SPX	7-0103-002	7-0103-001	M		NA	NA
962	2-1116-003||10_114293748_T_C	genome	NDD	autism	10_114293748_T_C	10	114293748	T	C	143187	VTI1A	+	intron			intronic	VTI1A	.	.	.	.	.	.	.	.	.	.	.	.	.	.	.	.	.	.	Yuen2016	2-1116-003	FAM_2-1116-003	SPX	2-1116-002	2-1116-001	M		NA	NA
963	AU070703||10_114295795_T_C	genome	NDD	autism	10_114295795_T_C	10	114295795	T	C	143187	VTI1A	+	intron			intronic	VTI1A	.	.	.	.	.	.	.	.	.	.	.	.	.	.	.	.	.	.	Yuen2017	AU070703	FAM_AU070703	MPX	AU070702	AU070701	M		NA	NA
964	13581.s1||10_114305780_C_T	genome	control	control	10_114305780_C_T	10	114305780	C	T	143187	VTI1A	+	intron	Simple_repeat	1	intronic	VTI1A	.	.	.	.	.	.	.	.	.	.	.	.	.	.	.	.	.	.	SSC	13581.s1	13581	simplex	13581.f1	13581.m1	female	.	309	284
965	14536.p1||10_114320431_C_T	genome	NDD	autism	10_114320431_C_T	10	114320431	C	T	143187	VTI1A	+	intron	SINE	1	intronic	VTI1A	.	.	.	.	.	.	.	.	.	.	.	.	.	.	.	.	.	.	SSC	14536.p1	14536	simplex	14536.f1	14536.m1	male	41	326	312
966	13512.s1||10_114321324_A_G	genome	control	control	10_114321324_A_G	10	114321324	A	G	143187	VTI1A	+	intron			intronic	VTI1A	.	.	.	.	.	.	.	.	.	.	.	.	.	.	.	.	.	.	SSC	13512.s1	13512	simplex	13512.f1	13512.m1	female	.	335	310
967	7-0078-003||10_114345006_T_C	genome	NDD	autism	10_114345006_T_C	10	114345006	T	C	143187	VTI1A	+	intron			intronic	VTI1A	.	.	.	.	.	.	.	.	.	.	.	.	.	.	.	.	.	.	Yuen2017	7-0078-003	FAM_7-0078-003	SPX	7-0078-002	7-0078-001	M		NA	NA
968	11556.s1||10_114346675_T_A	genome	control	control	10_114346675_T_A	10	114346675	T	A	143187	VTI1A	+	intron			intronic	VTI1A	.	.	.	.	.	.	.	.	.	.	.	.	.	.	.	.	.	.	SSC	11556.s1	11556	simplex	11556.f1	11556.m1	female	.	354	366
969	13784.p1||10_114351758_T_A	genome	NDD	autism	10_114351758_T_A	10	114351758	T	A	143187	VTI1A	+	intron	LTR	1	intronic	VTI1A	.	.	.	.	.	.	.	.	.	.	.	.	.	.	.	.	.	.	Turner_2017;SSC	13784.p1	;13784	;simplex	;13784.f1	;13784.m1	;male	;116	NA;531	NA;428
970	AU1223303||10_114363013_C_G	genome	NDD	autism	10_114363013_C_G	10	114363013	C	G	143187	VTI1A	+	intron			intronic	VTI1A	.	.	.	.	.	.	.	.	.	.	.	.	.	.	.	.	.	.	Yuen2017	AU1223303	FAM_AU1223303	MPX	AU1223201	AU1223202	M		NA	NA
971	12770.s1||10_114363356_G_A	genome	control	control	10_114363356_G_A	10	114363356	G	A	143187	VTI1A	+	intron			intronic	VTI1A	.	.	.	.	.	.	.	.	.	.	.	.	.	.	.	.	.	.	SSC	12770.s1	12770	simplex	12770.f1	12770.m1	male	.	385	333
972	13381.p1||10_114363881_A_G	genome	NDD	autism	10_114363881_A_G	10	114363881	A	G	143187	VTI1A	+	intron			intronic	VTI1A	.	.	.	.	.	.	.	.	.	.	.	.	.	.	.	.	.	.	SSC	13381.p1	13381	simplex	13381.f1	13381.m1	male	86	412	411
973	14506.s1||10_114364451_T_C	genome	control	control	10_114364451_T_C	10	114364451	T	C	143187	VTI1A	+	intron			intronic	VTI1A	.	.	.	.	.	.	.	.	.	.	.	.	.	.	.	.	.	.	SSC	14506.s1	14506	simplex	14506.f1	14506.m1	female	.	363	325
974	14404.p1||10_114370200_A_G	genome	NDD	autism	10_114370200_A_G	10	114370200	A	G	143187	VTI1A	+	intron	LINE	1	intronic	VTI1A	.	.	.	.	.	.	.	.	.	.	.	.	.	.	.	.	.	.	Turner_2017;SSC	14404.p1	;14404	;simplex	;14404.f1	;14404.m1	;male	;20	NA;463	NA;433
975	2-0110-003||10_114374065_C_T	genome	NDD	autism	10_114374065_C_T	10	114374065	C	T	143187	VTI1A	+	intron			intronic	VTI1A	.	.	.	.	.	.	.	.	.	.	.	.	.	.	.	.	.	.	Yuen2017	2-0110-003	FAM_2-0110-003	SPX	2-0110-002	2-0110-001	F		NA	NA
976	13324.p1||10_114378308_T_A	genome	NDD	autism	10_114378308_T_A	10	114378308	T	A	143187	VTI1A	+	intron			intronic	VTI1A	.	.	.	.	.	.	.	.	.	.	.	.	.	.	.	.	.	.	Turner2016	13324.p1							NA	NA
977	2-1230-003||10_114379410_T_C	genome	NDD	autism	10_114379410_T_C	10	114379410	T	C	143187	VTI1A	+	intron			intronic	VTI1A	.	.	.	.	.	.	.	.	.	.	.	.	.	.	.	.	.	.	Yuen2016	2-1230-003	FAM_2-1230-003	SPX	2-1230-002	2-1230-001	F		NA	NA
978	AU2950301||10_114417151_T_C	genome	NDD	autism	10_114417151_T_C	10	114417151	T	C	143187	VTI1A	+	intron	Low_complexity	1	intronic	VTI1A	.	.	.	.	.	.	.	.	.	.	.	.	.	.	.	.	.	.	Yuen2017	AU2950301	FAM_AU2950302	SPX	AU2950201	AU2950202	M		NA	NA
979	AU4260303||10_114423727_T_C	genome	NDD	autism	10_114423727_T_C	10	114423727	T	C	143187	VTI1A	+	intron			intronic	VTI1A	.	.	.	.	.	.	.	.	.	.	.	.	.	.	.	.	.	.	Yuen2017	AU4260303	FAM_AU4260303	SPX	AU4260201	AU4260202	M		NA	NA
980	AU049304||10_114430092_G_T	genome	NDD	autism	10_114430092_G_T	10	114430092	G	T	143187	VTI1A	+	intron			intronic	VTI1A	.	.	.	.	.	.	.	.	.	.	.	.	.	.	.	.	.	.	Yuen2017	AU049304	FAM_AU049304	MPX	AU049302	AU049301	M		NA	NA
981	13629.p1||10_114438054_G_A	genome	NDD	autism	10_114438054_G_A	10	114438054	G	A	143187	VTI1A	+	intron			intronic	VTI1A	.	.	.	.	.	.	.	.	.	.	.	.	.	.	.	.	.	.	Turner_2017;SSC	13629.p1	;13629	;simplex	;13629.f1	;13629.m1	;male	;63	NA;452	NA;407
982	13333.s1||10_114441164_G_T	genome	control	control	10_114441164_G_T	10	114441164	G	T	143187	VTI1A	+	intron	DNA	1	intronic	VTI1A	.	.	.	.	.	.	.	.	.	.	.	.	.	.	.	.	.	.	SSC	13333.s1	13333	simplex	13333.f1	13333.m1	male	.	428	374
983	12369.p1||10_114443756_C_G	genome	NDD	autism	10_114443756_C_G	10	114443756	C	G	143187	VTI1A	+	intron	SINE	1	intronic	VTI1A	.	.	.	.	.	.	.	.	.	.	.	.	.	.	.	.	.	.	SSC	12369.p1	12369	simplex	12369.f1	12369.m1	male	59	399	372
984	12418.p1||10_114454830_G_A	genome	NDD	autism	10_114454830_G_A	10	114454830	G	A	143187	VTI1A	+	intron			intronic	VTI1A	.	.	.	.	.	.	.	.	.	.	.	.	.	.	.	.	.	.	SSC	12418.p1	12418	simplex	12418.f1	12418.m1	male	95	474	314
985	13523.p1||10_114463924_T_C	genome	NDD	autism	10_114463924_T_C	10	114463924	T	C	143187	VTI1A	+	intron			intronic	VTI1A	.	.	.	.	.	.	.	.	.	.	.	.	.	.	.	.	.	.	Turner_2017;SSC	13523.p1	;13523	;simplex	;13523.f1	;13523.m1	;male	;98	NA;421	NA;420
986	11872.s1||10_114464760_G_T	genome	control	control	10_114464760_G_T	10	114464760	G	T	143187	VTI1A	+	intron	SINE	1	intronic	VTI1A	.	.	.	.	.	.	.	.	.	.	.	.	.	.	.	.	.	.	SSC	11872.s1	11872	simplex	11872.f1	11872.m1	female	.	491	425
987	14066.p1||10_114473862_A_G	genome	NDD	autism	10_114473862_A_G	10	114473862	A	G	143187	VTI1A	+	intron			intronic	VTI1A	.	.	.	.	.	.	.	.	.	.	.	.	.	.	.	.	.	.	SSC	14066.p1	14066	simplex	14066.f1	14066.m1	male	91	430	357
988	11047.s1||10_114476652_C_T	genome	control	control	10_114476652_C_T	10	114476652	C	T	143187	VTI1A	+	intron			intronic	VTI1A	.	.	.	.	.	.	.	.	.	.	.	.	.	.	.	.	.	.	SSC	11047.s1	11047	simplex	11047.f1	11047.m1	female	.	494	449
989	2-0007-004||10_114482108_G_A	genome	NDD	autism	10_114482108_G_A	10	114482108	G	A	143187	VTI1A	+	intron	LINE	1	intronic	VTI1A	.	.	.	.	.	.	.	.	.	.	.	.	.	.	.	.	.	.	Yuen2017	2-0007-004	FAM_2-0007-004	MPX	2-0007-002	2-0007-001	F		NA	NA
990	14065.s1||10_114483418_A_G	genome	control	control	10_114483418_A_G	10	114483418	A	G	143187	VTI1A	+	intron			intronic	VTI1A	.	.	.	.	.	.	.	.	.	.	.	.	.	.	.	.	.	.	Turner_2017;SSC	14065.s1	;14065	;simplex	;14065.f1	;14065.m1	;female	;.	NA;455	NA;421
991	2-1093-005||10_114491266_G_A	genome	NDD	autism	10_114491266_G_A	10	114491266	G	A	143187	VTI1A	+	intron	SINE	1	intronic	VTI1A	.	.	.	.	.	.	.	.	.	.	.	.	.	.	.	.	.	.	Yuen2017	2-1093-005	FAM_2-1093-009	MPX	2-1093-002	2-1093-001	M		NA	NA
992	11132.s1||10_114503876_G_A	genome	control	control	10_114503876_G_A	10	114503876	G	A	143187	VTI1A	+	intron	DNA	1	intronic	VTI1A	.	.	.	.	.	.	.	.	.	.	.	.	.	.	.	.	.	.	SSC	11132.s1	11132	simplex	11132.f1	11132.m1	male	.	376	351
993	13340.p1||10_114515818_G_A	genome	NDD	autism	10_114515818_G_A	10	114515818	G	A	143187	VTI1A	+	intron	Low_complexity	1	intronic	VTI1A	.	.	.	.	.	.	.	.	.	.	.	.	.	.	.	.	.	.	SSC	13340.p1	13340	simplex	13340.f1	13340.m1	male	90	411	406
994	13340.s1||10_114515818_G_A	genome	control	control	10_114515818_G_A	10	114515818	G	A	143187	VTI1A	+	intron	Low_complexity	1	intronic	VTI1A	.	.	.	.	.	.	.	.	.	.	.	.	.	.	.	.	.	.	SSC	13340.s1	13340	simplex	13340.f1	13340.m1	male	.	374	369
995	14659.p1||10_114516294_C_T	genome	NDD	autism	10_114516294_C_T	10	114516294	C	T	143187	VTI1A	+	intron	LINE	1	intronic	VTI1A	.	.	.	.	.	.	.	.	.	.	.	.	.	.	.	.	.	.	SSC	14659.p1	14659	simplex	14659.f1	14659.m1	male	25	485	394
996	11234.p1||10_114527147_A_G	genome	NDD	autism	10_114527147_A_G	10	114527147	A	G	143187	VTI1A	+	intron			intronic	VTI1A	.	.	.	.	.	.	.	.	.	.	.	.	.	.	.	.	.	.	Turner_2017;SSC	11234.p1	;11234	;simplex	;11234.f1	;11234.m1	;male	;117	NA;454	NA;372
997	14653.s1||10_114533704_C_T	genome	control	control	10_114533704_C_T	10	114533704	C	T	143187	VTI1A	+	intron	SINE	1	intronic	VTI1A	.	.	.	.	.	.	.	.	.	.	.	.	.	.	.	.	.	.	SSC	14653.s1	14653	simplex	14653.f1	14653.m1	female	.	418	390
998	AU4197302||10_114538350_C_T	genome	NDD	autism	10_114538350_C_T	10	114538350	C	T	143187	VTI1A	+	intron			intronic	VTI1A	.	.	.	.	.	.	.	.	.	.	.	.	.	.	.	.	.	.	Yuen2017	AU4197302	FAM_AU4197302	MPX	AU4197201	AU4197202	F		NA	NA
999	AU056804||10_114539966_G_C	genome	NDD	autism	10_114539966_G_C	10	114539966	G	C	143187	VTI1A	+	intron	SINE	1	intronic	VTI1A	.	.	.	.	.	.	.	.	.	.	.	.	.	.	.	.	.	.	Yuen2017	AU056804	FAM_AU056804	MPX	AU056802	AU056801	M		NA	NA
1000	AU3636302||10_114542749_A_G	genome	NDD	autism	10_114542749_A_G	10	114542749	A	G	143187	VTI1A	+	intron			intronic	VTI1A	.	.	.	.	.	.	.	.	.	.	.	.	.	.	.	.	.	.	Yuen2017	AU3636302	FAM_AU3636302	MPX	AU3636201	AU3636202	M		NA	NA
1001	14228.s1||10_114552904_C_G	genome	control	control	10_114552904_C_G	10	114552904	C	G	143187	VTI1A	+	intron			intronic	VTI1A	.	.	.	.	.	.	.	.	.	.	.	.	.	.	.	.	.	.	SSC	14228.s1	14228	simplex	14228.f1	14228.m1	male	.	470	392
1002	AU3912301||10_114559727_G_A	genome	NDD	autism	10_114559727_G_A	10	114559727	G	A	143187	VTI1A	+	intron	Simple_repeat	1	intronic	VTI1A	.	.	.	.	.	.	.	.	.	.	.	.	.	.	.	.	.	.	Yuen2017	AU3912301	FAM_AU3912303	MPX	AU3912201	AU3912202	M		NA	NA
1003	11989.s1||10_114583341_C_G	genome	control	control	10_114583341_C_G	10	114583341	C	G			+	exon_unclassified			ncRNA_exonic	LOC103344931	.	.	.	.	.	.	.	.	.	.	.	.	.	.	.	.	.	.	SSC	11989.s1	11989	simplex	11989.f1	11989.m1	female	.	426	360
1004	12308.s1||10_114712396_G_A	genome	control	control	10_114712396_G_A	10	114712396	G	A	6934	TCF7L2	+	intron			intronic	TCF7L2	.	.	.	.	.	.	.	.	.	.	.	.	.	.	.	.	.	.	SSC	12308.s1	12308	simplex	12308.f1	12308.m1	male	.	598	426
1005	3-0246-000||10_114716580_A_G	genome	NDD	autism	10_114716580_A_G	10	114716580	A	G	6934	TCF7L2	+	intron			intronic	TCF7L2	.	.	.	.	.	.	.	.	.	.	.	.	.	.	.	.	.	.	Yuen2017	3-0246-000	FAM_3-0246-101	SPX	3-0246-101	3-0246-100	F		NA	NA
1006	AU4219302||10_114722696_G_A	genome	NDD	autism	10_114722696_G_A	10	114722696	G	A	6934	TCF7L2	+	intron			intronic	TCF7L2	.	.	.	.	.	.	.	.	.	.	.	.	.	.	.	.	.	.	Yuen2017	AU4219302	FAM_AU4219302	SPX	AU4219201	AU4219202	M		NA	NA
1007	13006.p1||10_114741994_A_T	genome	NDD	autism	10_114741994_A_T	10	114741994	A	T	6934	TCF7L2	+	intron			intronic	TCF7L2	.	.	.	.	.	.	.	.	.	.	.	.	.	.	.	.	.	.	SSC	13006.p1	13006	simplex	13006.f1	13006.m1	male	56	322	284
1008	14134.s1||10_114749525_G_T	genome	control	control	10_114749525_G_T	10	114749525	G	T	6934	TCF7L2	+	intron			intronic	TCF7L2	.	.	.	.	.	.	.	.	.	.	.	.	.	.	.	.	.	.	SSC	14134.s1	14134	simplex	14134.f1	14134.m1	female	.	349	283
1009	13718.p1||10_114755902_G_A	genome	NDD	autism	10_114755902_G_A	10	114755902	G	A	6934	TCF7L2	+	intron			intronic	TCF7L2	.	.	.	.	.	.	.	.	.	.	.	.	.	.	.	.	.	.	SSC	13718.p1	13718	simplex	13718.f1	13718.m1	male	98	339	322
1010	12285.p1||10_114764892_A_G	genome	NDD	autism	10_114764892_A_G	10	114764892	A	G	6934	TCF7L2	+	intron			intronic	TCF7L2	.	.	.	.	.	.	.	.	.	.	.	.	.	.	.	.	.	.	Turner_2017;SSC	12285.p1	;12285	;simplex	;12285.f1	;12285.m1	;female	;79	NA;504	NA;442
1011	AU3918302||10_114769237_A_G	genome	NDD	autism	10_114769237_A_G	10	114769237	A	G	6934	TCF7L2	+	intron			intronic	TCF7L2	.	.	.	.	.	.	.	.	.	.	.	.	.	.	.	.	.	.	Yuen2017	AU3918302	FAM_AU3918302	MPX	AU3918201	AU3918202	M		NA	NA
1012	11679.s1||10_114773791_G_A	genome	control	control	10_114773791_G_A	10	114773791	G	A	6934	TCF7L2	+	intron	LTR	1	intronic	TCF7L2	.	.	.	.	.	.	.	.	.	.	.	.	.	.	.	.	.	.	Turner_2017	11679.s1							NA	NA
1013	11587.s1||10_114775227_G_T	genome	control	control	10_114775227_G_T	10	114775227	G	T	6934	TCF7L2	+	intron	SINE	1	intronic	TCF7L2	.	.	.	.	.	.	.	.	.	.	.	.	.	.	.	.	.	.	Turner_2017	11587.s1							NA	NA
1014	14299.p1||10_114778610_A_G	genome	NDD	autism	10_114778610_A_G	10	114778610	A	G	6934	TCF7L2	+	intron			intronic	TCF7L2	.	.	.	.	.	.	.	.	.	.	.	.	.	.	.	.	.	.	SSC	14299.p1	14299	simplex	14299.f1	14299.m1	male	75	369	320
1015	11345.p1||10_114778999_C_T	genome	NDD	autism	10_114778999_C_T	10	114778999	C	T	6934	TCF7L2	+	intron			intronic	TCF7L2	.	.	.	.	.	.	.	.	.	.	.	.	.	.	.	.	.	.	SSC	11345.p1	11345	simplex	11345.f1	11345.m1	male	120	391	281
1016	13823.p1||10_114779975_C_T	genome	NDD	autism	10_114779975_C_T	10	114779975	C	T	6934	TCF7L2	+	intron			intronic	TCF7L2	.	.	.	.	.	.	.	.	.	.	.	.	.	.	.	.	.	.	Turner_2017;SSC	13823.p1	;13823	;simplex	;13823.f1	;13823.m1	;male	;105	NA;386	NA;384
1017	14535.p1||10_114779999_T_C	genome	NDD	autism	10_114779999_T_C	10	114779999	T	C	6934	TCF7L2	+	intron			intronic	TCF7L2	.	.	.	.	.	.	.	.	.	.	.	.	.	.	.	.	.	.	SSC	14535.p1	14535	simplex	14535.f1	14535.m1	male	100	434	429
1018	12758.s1||10_114781635_C_A	genome	control	control	10_114781635_C_A	10	114781635	C	A	6934	TCF7L2	+	intron			intronic	TCF7L2	.	.	.	.	.	.	.	.	.	.	.	.	.	.	.	.	.	.	SSC	12758.s1	12758	simplex	12758.f1	12758.m1	female	.	402	385
1019	13166.s1||10_114799408_T_C	genome	control	control	10_114799408_T_C	10	114799408	T	C	6934	TCF7L2	+	intron			intronic	TCF7L2	.	.	.	.	.	.	.	.	.	.	.	.	.	.	.	.	.	.	SSC	13166.s1	13166	simplex	13166.f1	13166.m1	male	.	459	355
1020	AU4013302||10_114806972_G_A	genome	NDD	autism	10_114806972_G_A	10	114806972	G	A	6934	TCF7L2	+	intron	LINE	1	intronic	TCF7L2	.	.	.	.	.	.	.	.	.	.	.	.	.	.	.	.	.	.	Yuen2017	AU4013302	FAM_AU4013303	MPX	AU4013201	AU4013202	M		NA	NA
1021	14679.s1||10_114807870_C_T	genome	control	control	10_114807870_C_T	10	114807870	C	T	6934	TCF7L2	+	intron			intronic	TCF7L2	.	.	.	.	.	.	.	.	.	.	.	.	.	.	.	.	.	.	Turner_2017;SSC	14679.s1	;14679	;simplex	;14679.f1	;14679.m1	;male	;.	NA;408	NA;403
1022	12437.p1||10_114820873_G_T	genome	NDD	autism	10_114820873_G_T	10	114820873	G	T	6934	TCF7L2	+	intron			intronic	TCF7L2	.	.	.	.	.	.	.	.	.	.	.	.	.	.	.	.	.	.	SSC	12437.p1	12437	simplex	12437.f1	12437.m1	male	78	469	405
1023	13423.s1||10_114832529_C_G	genome	control	control	10_114832529_C_G	10	114832529	C	G	6934	TCF7L2	+	intron			intronic	TCF7L2	.	.	.	.	.	.	.	.	.	.	.	.	.	.	.	.	.	.	SSC	13423.s1	13423	simplex	13423.f1	13423.m1	male	.	313	282
1024	14482.p1||10_114835867_C_A	genome	NDD	autism	10_114835867_C_A	10	114835867	C	A	6934	TCF7L2	+	intron	SINE	1	intronic	TCF7L2	.	.	.	.	.	.	.	.	.	.	.	.	.	.	.	.	.	.	Turner_2017	14482.p1							NA	NA
1025	12052.p1||10_114847493_C_T	genome	NDD	autism	10_114847493_C_T	10	114847493	C	T	6934	TCF7L2	+	intron			intronic	TCF7L2	.	.	.	.	.	.	.	.	.	.	.	.	.	.	.	.	.	.	SSC	12052.p1	12052	simplex	12052.f1	12052.m1	male	100	379	373
1026	12375.s1||10_114848949_A_G	genome	control	control	10_114848949_A_G	10	114848949	A	G	6934	TCF7L2	+	intron			intronic	TCF7L2	.	.	.	.	.	.	.	.	.	.	.	.	.	.	.	.	.	.	SSC	12375.s1	12375	simplex	12375.f1	12375.m1	female	.	675	497
1027	13888.p1||10_114849308_C_T	genome	NDD	autism	10_114849308_C_T	10	114849308	C	T	6934	TCF7L2	+	intron			intronic	TCF7L2	.	.	.	.	.	.	.	.	.	.	.	.	.	.	.	.	.	.	SSC	13888.p1	13888	simplex	13888.f1	13888.m1	male	86	334	336
1028	14121.p1||10_114856976_G_A	genome	NDD	autism	10_114856976_G_A	10	114856976	G	A	6934	TCF7L2	+	intron			intronic	TCF7L2	.	.	.	.	.	.	.	.	.	.	.	.	.	.	.	.	.	.	SSC	14121.p1	14121	simplex	14121.f1	14121.m1	female	67	365	287
1029	11347.p1||10_114857133_C_T	genome	NDD	autism	10_114857133_C_T	10	114857133	C	T	6934	TCF7L2	+	intron	SINE	1	intronic	TCF7L2	.	.	.	.	.	.	.	.	.	.	.	.	.	.	.	.	.	.	SSC	11347.p1	11347	simplex	11347.f1	11347.m1	male	75	432	394
1030	14234.p1||10_114859422_T_C	genome	NDD	autism	10_114859422_T_C	10	114859422	T	C	6934	TCF7L2	+	intron			intronic	TCF7L2	.	.	.	.	.	.	.	.	.	.	.	.	.	.	.	.	.	.	SSC	14234.p1	14234	simplex	14234.f1	14234.m1	male	87	429	414
1031	2-1350-003||10_114867298_C_T	genome	NDD	autism	10_114867298_C_T	10	114867298	C	T	6934	TCF7L2	+	intron	SINE	1	intronic	TCF7L2	.	.	.	.	.	.	.	.	.	.	.	.	.	.	.	.	.	.	Yuen2017	2-1350-003	FAM_2-1350-004	MPX	2-1350-002	2-1350-001	F		NA	NA
1032	13547.s1||10_114871411_C_T	genome	control	control	10_114871411_C_T	10	114871411	C	T	6934	TCF7L2	+	intron	SINE	1	intronic	TCF7L2	.	.	.	.	.	.	.	.	.	.	.	.	.	.	.	.	.	.	SSC	13547.s1	13547	simplex	13547.f1	13547.m1	female	.	459	442
1033	13533.s1||10_114880917_G_T	genome	control	control	10_114880917_G_T	10	114880917	G	T	6934	TCF7L2	+	intron			intronic	TCF7L2	.	.	.	.	.	.	.	.	.	.	.	.	.	.	.	.	.	.	Turner_2017;SSC	13533.s1	;13533	;simplex	;13533.f1	;13533.m1	;male	;.	NA;300	NA;288
1034	11855.s1||10_114885469_G_A	genome	control	control	10_114885469_G_A	10	114885469	G	A	6934	TCF7L2	+	intron			intronic	TCF7L2	.	.	.	.	.	.	.	.	.	.	.	.	.	.	.	.	.	.	SSC	11855.s1	11855	simplex	11855.f1	11855.m1	female	.	373	357
1035	13069.p1||10_114901076_G_A	genome	NDD	autism	10_114901076_G_A	10	114901076	G	A	6934	TCF7L2	+	intron			splicing	TCF7L2	NM_001146274:exon6:c.685+1G>A;NM_001198530:exon4:c.514+1G>A;NM_001146283:exon6:c.757+1G>A;NM_030756:exon5:c.616+1G>A;NM_001146286:exon5:c.616+1G>A;NM_001198531:exon6:c.685+1G>A;NM_001198525:exon5:c.616+1G>A;NM_001198527:exon5:c.616+1G>A;NM_001198526:exon5:c.616+1G>A;NM_001198529:exon5:c.616+1G>A;NM_001198528:exon5:c.616+1G>A;NM_001146285:exon5:c.616+1G>A;NM_001146284:exon5:c.616+1G>A;NM_001349871…	.	.	.	.	.	.	D	.	.	.	.	.	.	D	27.9	1.044	0.99	Turner_2017	13069.p1							NA	NA
1036	12090.p1||10_114910883_G_A	genome	NDD	autism	10_114910883_G_A	10	114910883	G	A	6934	TCF7L2	+	intron			splicing	TCF7L2	NM_001146274:exon9:c.1001+1G>A;NM_001198530:exon7:c.830+1G>A;NM_001146283:exon9:c.1073+1G>A;NM_030756:exon8:c.932+1G>A;NM_001146286:exon8:c.932+1G>A;NM_001198531:exon9:c.1001+1G>A;NM_001198525:exon8:c.947+1G>A;NM_001198527:exon8:c.920+1G>A;NM_001198526:exon8:c.932+1G>A;NM_001198529:exon8:c.932+1G>A;NM_001198528:exon8:c.932+1G>A;NM_001146285:exon8:c.932+1G>A;NM_001146284:exon8:c.920+1G>A;NM_001349…	.	.	.	.	.	.	D	.	.	.	.	.	.	D	25.8	1.044	0.995	SSC	12090.p1	12090	simplex	12090.f1	12090.m1	female	85	354	361
1037	13565.p1||10_114920513_G_A	genome	NDD	autism	10_114920513_G_A	10	114920513	G	A	6934	TCF7L2	+	intron			intronic	TCF7L2	.	.	.	.	.	.	.	.	.	.	.	.	.	.	.	.	.	.	SSC	13565.p1	13565	simplex	13565.f1	13565.m1	male	61	620	462
1038	1-0368-004||10_114920669_C_G	genome	NDD	autism	10_114920669_C_G	10	114920669	C	G	6934	TCF7L2	+	intron			intronic	TCF7L2	.	.	.	.	.	.	.	.	.	.	.	.	.	.	.	.	.	.	Yuen2017	1-0368-004	FAM_1-0368-004	SPX	1-0368-002	1-0368-001	M		NA	NA
1039	2-0219-004||10_114920870_G_A	genome	NDD	autism	10_114920870_G_A	10	114920870	G	A	6934	TCF7L2	+	intron			intronic	TCF7L2	.	.	.	.	.	.	.	.	.	.	.	.	.	.	.	.	.	.	Yuen2017	2-0219-004	FAM_2-0219-004	MPX	2-0219-002	2-0219-001	M		NA	NA
1040	13497.p1||10_114926149_G_A	genome	NDD	autism	10_114926149_G_A	10	114926149	G	A	6934	TCF7L2	+	3'UTR			UTR3	TCF7L2	NM_001146274:c.*418G>A;NM_001198530:c.*756G>A;NM_001146283:c.*756G>A;NM_030756:c.*418G>A;NM_001146286:c.*756G>A;NM_001198531:c.*756G>A;NM_001198525:c.*866G>A;NM_001198527:c.*854G>A;NM_001198526:c.*418G>A;NM_001198529:c.*756G>A;NM_001198528:c.*854G>A;NM_001146285:c.*418G>A;NM_001146284:c.*756G>A;NM_001349871:c.*854G>A;NM_001349870:c.*854G>A	.	.	.	.	.	.	.	.	.	.	.	.	.	.	.	.	.	SSC	13497.p1	13497	simplex	13497.f1	13497.m1	male	49	520	437
1041	12444.p1||10_1150336_A_T	genome	NDD	autism	10_1150336_A_T	10	1150336	A	T	22884	WDR37	+	intron	LTR	1	intronic	WDR37	.	.	.	.	.	.	.	.	.	.	.	.	.	.	.	.	.	.	SSC	12444.p1	12444	simplex	12444.f1	12444.m1	female	59	383	373
1042	2-1180-003||10_11511423_G_C	genome	NDD	autism	10_11511423_G_C	10	11511423	G	C	9712	USP6NL	-	intron			intronic	USP6NL	.	.	.	.	.	.	.	.	.	.	.	.	.	.	.	.	.	.	Yuen2016	2-1180-003	FAM_2-1180-003	SPX	2-1180-002	2-1180-001	M		NA	NA
1043	12326.p1||10_11517560_A_T	genome	NDD	autism	10_11517560_A_T	10	11517560	A	T	9712	USP6NL	-	intron	SINE	1	intronic	USP6NL	.	.	.	.	.	.	.	.	.	.	.	.	.	.	.	.	.	.	Turner_2017;SSC	12326.p1	;12326	;simplex	;12326.f1	;12326.m1	;male	;112	NA;377	NA;344
1044	AU1988301||10_11526741_A_C	genome	NDD	autism	10_11526741_A_C	10	11526741	A	C	9712	USP6NL	-	intron			intronic	USP6NL	.	.	.	.	.	.	.	.	.	.	.	.	.	.	.	.	.	.	Yuen2017	AU1988301	FAM_AU1988302	MPX	AU1988201	AU1988202	M		NA	NA
1045	2-1369-003||10_11528230_T_C	genome	NDD	autism	10_11528230_T_C	10	11528230	T	C	9712	USP6NL	-	intron			intronic	USP6NL	.	.	.	.	.	.	.	.	.	.	.	.	.	.	.	.	.	.	Yuen2017	2-1369-003	FAM_2-1369-003	SPX	2-1369-002	2-1369-001	M		NA	NA
1046	AU003403||10_1153019_T_G	genome	control	control	10_1153019_T_G	10	1153019	T	G	22884	WDR37	+	intron			intronic	WDR37	.	.	.	.	.	.	.	.	.	.	.	.	.	.	.	.	.	.	Yuen2017	AU003403	FAM_AU003406	MPX	AU003402	AU003401	F		NA	NA
1047	12958.p1||10_115320990_A_G	genome	NDD	autism	10_115320990_A_G	10	115320990	A	G	3026	HABP2	+	intron			intronic	HABP2	.	.	.	.	.	.	.	.	.	.	.	.	.	.	.	.	.	.	SSC	12958.p1	12958	simplex	12958.f1	12958.m1	male	87	432	425
1048	12426.s1||10_115327048_C_T	genome	control	control	10_115327048_C_T	10	115327048	C	T	3026	HABP2	+	intron			intronic	HABP2	.	.	.	.	.	.	.	.	.	.	.	.	.	.	.	.	.	.	SSC	12426.s1	12426	simplex	12426.f1	12426.m1	female	.	444	440
1049	12683.p1||10_115329231_G_A	genome	NDD	autism	10_115329231_G_A	10	115329231	G	A	3026	HABP2	+	intron			intronic	HABP2	.	.	.	.	.	.	.	.	.	.	.	.	.	.	.	.	.	.	SSC	12683.p1	12683	simplex	12683.f1	12683.m1	male	91	379	343
1050	12683.s1||10_115329231_G_A	genome	control	control	10_115329231_G_A	10	115329231	G	A	3026	HABP2	+	intron			intronic	HABP2	.	.	.	.	.	.	.	.	.	.	.	.	.	.	.	.	.	.	SSC	12683.s1	12683	simplex	12683.f1	12683.m1	male	.	422	386
1051	14442.p1||10_115329651_C_T	genome	NDD	autism	10_115329651_C_T	10	115329651	C	T	3026	HABP2	+	intron			intronic	HABP2	.	.	.	.	.	.	.	.	.	.	.	.	.	.	.	.	.	.	SSC	14442.p1	14442	simplex	14442.f1	14442.m1	male	89	364	318
1052	11193.p1||10_1153309_C_T	genome	NDD	autism	10_1153309_C_T	10	1153309	C	T	22884	WDR37	+	intron			intronic	WDR37	.	.	.	.	.	.	.	.	.	.	.	.	.	.	.	.	.	.	SSC	11193.p1	11193	simplex	11193.f1	11193.m1	male	138	399	347
1053	1-0551-004||10_11533236_G_A	genome	NDD	autism	10_11533236_G_A	10	11533236	G	A	9712	USP6NL	-	intron	LTR	1	intronic	USP6NL	.	.	.	.	.	.	.	.	.	.	.	.	.	.	.	.	.	.	Yuen2017	1-0551-004	FAM_1-0551-004	MPX	1-0551-002	1-0551-001	M		NA	NA
1054	13634.s1||10_115338511_A_T	genome	control	control	10_115338511_A_T	10	115338511	A	T	3026	HABP2	+	CDS||3'UTR			exonic	HABP2	.	nonsynonymous SNV	HABP2:NM_001177660:exon7:c.A616T:p.M206L,HABP2:NM_004132:exon7:c.A694T:p.M232L	T	P	P	D	D	L	T	N	T	T	D	D	23.1	1.199	1	SSC	13634.s1	13634	simplex	13634.f1	13634.m1	female	.	373	362
1055	11982.p1||10_115339471_G_C	genome	NDD	autism	10_115339471_G_C	10	115339471	G	C	3026	HABP2	+	intron			intronic	HABP2	.	.	.	.	.	.	.	.	.	.	.	.	.	.	.	.	.	.	SSC	11982.p1	11982	simplex	11982.f1	11982.m1	male	78	333	347
1056	11383.s1||10_115360364_C_A	genome	control	control	10_115360364_C_A	10	115360364	C	A	4892	NRAP	-	intron	SINE	1	intronic	NRAP	.	.	.	.	.	.	.	.	.	.	.	.	.	.	.	.	.	.	SSC	11383.s1	11383	simplex	11383.f1	11383.m1	male	.	385	378
1057	12121.s1||10_115368786_G_C	genome	control	control	10_115368786_G_C	10	115368786	G	C	4892	NRAP	-	intron	SINE	1	intronic	NRAP	.	.	.	.	.	.	.	.	.	.	.	.	.	.	.	.	.	.	SSC	12121.s1	12121	simplex	12121.f1	12121.m1	female	.	336	298
1058	AU000704||10_115368884_A_C	genome	NDD	autism	10_115368884_A_C	10	115368884	A	C	4892	NRAP	-	intron	SINE	1	intronic	NRAP	.	.	.	.	.	.	.	.	.	.	.	.	.	.	.	.	.	.	Yuen2017	AU000704	FAM_AU000704	MPX	AU000702	AU000701	F		NA	NA
1059	14245.p1||10_115370746_G_T	genome	NDD	autism	10_115370746_G_T	10	115370746	G	T	4892	NRAP	-	intron			intronic	NRAP	.	.	.	.	.	.	.	.	.	.	.	.	.	.	.	.	.	.	SSC	14245.p1	14245	simplex	14245.f1	14245.m1	female	74	388	396
1060	14485.s1||10_115370901_C_G	genome	control	control	10_115370901_C_G	10	115370901	C	G	4892	NRAP	-	intron			intronic	NRAP	.	.	.	.	.	.	.	.	.	.	.	.	.	.	.	.	.	.	SSC	14485.s1	14485	simplex	14485.f1	14485.m1	male	.	468	449
1061	3-0456-000||10_11537104_G_A	genome	NDD	autism	10_11537104_G_A	10	11537104	G	A	9712	USP6NL	-	intron	LTR	1	intronic	USP6NL	.	.	.	.	.	.	.	.	.	.	.	.	.	.	.	.	.	.	Yuen2016	3-0456-000	FAM_3-0456-101	SPX	3-0456-101	3-0456-100	M		NA	NA
1062	AU4032307||10_115373798_G_C	genome	NDD	autism	10_115373798_G_C	10	115373798	G	C	4892	NRAP	-	intron	SINE	1	intronic	NRAP	.	.	.	.	.	.	.	.	.	.	.	.	.	.	.	.	.	.	Yuen2017	AU4032307	FAM_AU4032307	MPX	AU4032201	AU4032202	M		NA	NA
1063	14229.p1||10_115377617_T_A	genome	NDD	autism	10_115377617_T_A	10	115377617	T	A	4892	NRAP	-	intron			intronic	NRAP	.	.	.	.	.	.	.	.	.	.	.	.	.	.	.	.	.	.	SSC	14229.p1	14229	simplex	14229.f1	14229.m1	female	77	345	329
1064	13267.s1||10_115380567_G_C	genome	control	control	10_115380567_G_C	10	115380567	G	C	4892	NRAP	-	intron			intronic	NRAP	.	.	.	.	.	.	.	.	.	.	.	.	.	.	.	.	.	.	Turner_2017;SSC	13267.s1	;13267	;simplex	;13267.f1	;13267.m1	;female	;.	NA;372	NA;325
1065	12906.s1||10_115397310_A_T	genome	control	control	10_115397310_A_T	10	115397310	A	T	4892	NRAP	-	intron	DNA	1	intronic	NRAP	.	.	.	.	.	.	.	.	.	.	.	.	.	.	.	.	.	.	SSC	12906.s1	12906	simplex	12906.f1	12906.m1	female	.	537	448
1066	14563.p1||10_115406755_C_T	genome	NDD	autism	10_115406755_C_T	10	115406755	C	T	4892	NRAP	-	CDS			exonic	NRAP	.	nonsynonymous SNV	NRAP:NM_001261463:exon10:c.G920A:p.G307E,NRAP:NM_001322945:exon10:c.G920A:p.G307E,NRAP:NM_006175:exon10:c.G920A:p.G307E,NRAP:NM_198060:exon10:c.G920A:p.G307E	D	D	D	D	D	M	T	D	T	T	D	D	29.6	0.935	0.94	SSC	14563.p1	14563	simplex	14563.f1	14563.m1	male	97	463	453
1067	2-1169-004||10_115407194_A_G	genome	NDD	autism	10_115407194_A_G	10	115407194	A	G	4892	NRAP	-	intron			intronic	NRAP	.	.	.	.	.	.	.	.	.	.	.	.	.	.	.	.	.	.	Yuen2017	2-1169-004	FAM_2-1169-004	MPX	2-1169-002	2-1169-001	F		NA	NA
1068	14265.s1||10_115412648_A_T	genome	control	control	10_115412648_A_T	10	115412648	A	T	4892	NRAP	-	intron			intronic	NRAP	.	.	.	.	.	.	.	.	.	.	.	.	.	.	.	.	.	.	SSC	14265.s1	14265	simplex	14265.f1	14265.m1	male	.	463	439
1069	2-1325-003||10_115445906_T_G	genome	NDD	autism	10_115445906_T_G	10	115445906	T	G	840	CASP7	+	intron	LTR	1	intronic	CASP7	.	.	.	.	.	.	.	.	.	.	.	.	.	.	.	.	.	.	Yuen2016	2-1325-003	FAM_2-1325-003	SPX	2-1325-002	2-1325-001	M		NA	NA
1070	gonl-191c||10_115460931_C_T	genome	control	control	10_115460931_C_T	10	115460931	C	T	840	CASP7	+	intron	DNA	1	intronic	CASP7	.	.	.	.	.	.	.	.	.	.	.	.	.	.	.	.	.	.	GONL	gonl-191c							NA	NA
1071	12197.s1||10_115461250_T_G	genome	control	control	10_115461250_T_G	10	115461250	T	G	840	CASP7	+	intron	SINE	1	intronic	CASP7	.	.	.	.	.	.	.	.	.	.	.	.	.	.	.	.	.	.	SSC	12197.s1	12197	simplex	12197.f1	12197.m1	female	.	392	382
1072	1-0971-003||10_115462776_T_C	genome	NDD	autism	10_115462776_T_C	10	115462776	T	C	840	CASP7	+	intron	DNA	1	intronic	CASP7	.	.	.	.	.	.	.	.	.	.	.	.	.	.	.	.	.	.	Yuen2017	1-0971-003	FAM_1-0971-003	SPX	1-0971-002	1-0971-001	M		NA	NA
1073	14452.p1||10_115464934_G_A	genome	NDD	autism	10_115464934_G_A	10	115464934	G	A	840	CASP7	+	intron			intronic	CASP7	.	.	.	.	.	.	.	.	.	.	.	.	.	.	.	.	.	.	Turner_2017;SSC	14452.p1	;14452	;simplex	;14452.f1	;14452.m1	;male	;114	NA;376	NA;360
1074	AU4219302||10_115473069_A_G	genome	NDD	autism	10_115473069_A_G	10	115473069	A	G	840	CASP7	+	intron	LTR	1	intronic	CASP7	.	.	.	.	.	.	.	.	.	.	.	.	.	.	.	.	.	.	Yuen2017	AU4219302	FAM_AU4219302	SPX	AU4219201	AU4219202	M		NA	NA
1075	14356.s1||10_115477598_G_T	genome	control	control	10_115477598_G_T	10	115477598	G	T	840	CASP7	+	intron			intronic	CASP7	.	.	.	.	.	.	.	.	.	.	.	.	.	.	.	.	.	.	SSC	14356.s1	14356	simplex	14356.f1	14356.m1	male	.	356	337
1076	12390.p1||10_115481593_C_G	genome	NDD	autism	10_115481593_C_G	10	115481593	C	G	840	CASP7	+	intron	SINE	1	intronic	CASP7	.	.	.	.	.	.	.	.	.	.	.	.	.	.	.	.	.	.	Turner_2017;SSC	12390.p1	;12390	;simplex	;12390.f1	;12390.m1	;male	;97	NA;390	NA;318
1077	12630.p1||10_115483525_G_A	genome	NDD	autism	10_115483525_G_A	10	115483525	G	A	840	CASP7	+	intron	SINE	1	intronic	CASP7	.	.	.	.	.	.	.	.	.	.	.	.	.	.	.	.	.	.	Turner_2017;SSC	12630.p1	;12630	;simplex	;12630.f1	;12630.m1	;male	;115	NA;379	NA;389
1078	13528.p1||10_115486480_A_G	genome	NDD	autism	10_115486480_A_G	10	115486480	A	G	840	CASP7	+	intron	LTR	1	intronic	CASP7	.	.	.	.	.	.	.	.	.	.	.	.	.	.	.	.	.	.	SSC	13528.p1	13528	simplex	13528.f1	13528.m1	male	52	422	311
1079	2-1140-003||10_115527253_A_G	genome	NDD	autism	10_115527253_A_G	10	115527253	A	G	79949	PLEKHS1	+	intron			intronic	PLEKHS1	.	.	.	.	.	.	.	.	.	.	.	.	.	.	.	.	.	.	Yuen2017	2-1140-003	FAM_2-1140-003	SPX	2-1140-002	2-1140-001	F		NA	NA
1080	22198.p1||10_115532654_C_T	genome	NDD	autism	10_115532654_C_T	10	115532654	C	T	79949	PLEKHS1	+	intron	LINE	1	intronic	PLEKHS1	.	.	.	.	.	.	.	.	.	.	.	.	.	.	.	.	.	.	SSC	22198.p1	KOR-198	simplex	KOR-198.f1	KOR-198.m1	male		394	348
1081	22198.s1||10_115532654_C_T	genome	control	control	10_115532654_C_T	10	115532654	C	T	79949	PLEKHS1	+	intron	LINE	1	intronic	PLEKHS1	.	.	.	.	.	.	.	.	.	.	.	.	.	.	.	.	.	.	SSC	22198.s1	KOR-198	simplex	KOR-198.f1	KOR-198.m1	male		371	325
1082	AU3846302||10_115535330_T_C	genome	NDD	autism	10_115535330_T_C	10	115535330	T	C	79949	PLEKHS1	+	intron			intronic	PLEKHS1	.	.	.	.	.	.	.	.	.	.	.	.	.	.	.	.	.	.	Yuen2017	AU3846302	FAM_AU3846303	MPX	AU3846201	AU3846202	M		NA	NA
1083	13886.s1||10_11555401_G_T	genome	control	control	10_11555401_G_T	10	11555401	G	T	9712	USP6NL	-	intron			intronic	USP6NL	.	.	.	.	.	.	.	.	.	.	.	.	.	.	.	.	.	.	SSC	13886.s1	13886	simplex	13886.f1	13886.m1	male	.	411	395
1084	22017.s1||10_115600299_T_G	genome	control	control	10_115600299_T_G	10	115600299	T	G	9937	DCLRE1A	-	intron			intronic	DCLRE1A	.	.	.	.	.	.	.	.	.	.	.	.	.	.	.	.	.	.	SSC	22017.s1	KOR-017	simplex	KOR-017.f1	KOR-017.m1	female		403	346
1085	AU4032306||10_115604797_C_T	genome	NDD	autism	10_115604797_C_T	10	115604797	C	T	9937	DCLRE1A	-	intron			intronic	DCLRE1A	.	.	.	.	.	.	.	.	.	.	.	.	.	.	.	.	.	.	Yuen2017	AU4032306	FAM_AU4032307	MPX	AU4032201	AU4032202	F		NA	NA
1086	1-0139-003||10_115610349_T_C	genome	NDD	autism	10_115610349_T_C	10	115610349	T	C	9937	DCLRE1A	-	CDS			exonic	DCLRE1A	.	nonsynonymous SNV	DCLRE1A:NM_014881:exon2:c.A515G:p.Y172C,DCLRE1A:NM_001271816:exon3:c.A515G:p.Y172C	D	B	B	D	D	M	T	D	T	T	D	D	24.6	1.061	1	Yuen2017	1-0139-003	FAM_1-0139-005	MPX	1-0139-002	1-0139-001	F		NA	NA
1087	AU078503||10_115633059_T_C	genome	NDD	autism	10_115633059_T_C	10	115633059	T	C	374354	NHLRC2	+	intron	LINE	1	intronic	NHLRC2	.	.	.	.	.	.	.	.	.	.	.	.	.	.	.	.	.	.	Yuen2017	AU078503	FAM_AU078503	MPX	AU078502	AU078501	F		NA	NA
1088	12624.s1||10_115637742_A_G	genome	control	control	10_115637742_A_G	10	115637742	A	G	374354	NHLRC2	+	intron			intronic	NHLRC2	.	.	.	.	.	.	.	.	.	.	.	.	.	.	.	.	.	.	SSC	12624.s1	12624	simplex	12624.f1	12624.m1	female	.	450	535
1089	11894.p1||10_115641810_G_A	genome	NDD	autism	10_115641810_G_A	10	115641810	G	A	374354	NHLRC2	+	intron	LINE	1	intronic	NHLRC2	.	.	.	.	.	.	.	.	.	.	.	.	.	.	.	.	.	.	Turner_2017;SSC	11894.p1	;11894	;simplex	;11894.f1	;11894.m1	;male	;104	NA;504	NA;368
1090	14178.p1||10_115642002_T_C	genome	NDD	autism	10_115642002_T_C	10	115642002	T	C	374354	NHLRC2	+	intron	LINE	1	intronic	NHLRC2	.	.	.	.	.	.	.	.	.	.	.	.	.	.	.	.	.	.	Turner_2017;SSC	14178.p1	;14178	;simplex	;14178.f1	;14178.m1	;male	;38	NA;455	NA;454
1091	13703.s1||10_115646984_C_T	genome	control	control	10_115646984_C_T	10	115646984	C	T	374354	NHLRC2	+	intron	LINE	1	intronic	NHLRC2	.	.	.	.	.	.	.	.	.	.	.	.	.	.	.	.	.	.	SSC	13703.s1	13703	simplex	13703.f1	13703.m1	female	.	454	277
1092	AU3637301||10_115648895_A_G	genome	NDD	autism	10_115648895_A_G	10	115648895	A	G	374354	NHLRC2	+	intron			intronic	NHLRC2	.	.	.	.	.	.	.	.	.	.	.	.	.	.	.	.	.	.	Yuen2017	AU3637301	FAM_AU3637301	SPX	AU3637201	AU3637202	M		NA	NA
1093	2-1441-003||10_115653128_C_T	genome	NDD	autism	10_115653128_C_T	10	115653128	C	T	374354	NHLRC2	+	intron	SINE	1	intronic	NHLRC2	.	.	.	.	.	.	.	.	.	.	.	.	.	.	.	.	.	.	Yuen2016	2-1441-003	FAM_2-1441-003	SPX	2-1441-002	2-1441-001	F		NA	NA
1094	11181.p1||10_115657088_T_G	genome	NDD	autism	10_115657088_T_G	10	115657088	T	G	374354	NHLRC2	+	intron			intronic	NHLRC2	.	.	.	.	.	.	.	.	.	.	.	.	.	.	.	.	.	.	Turner_2017;SSC	11181.p1	;11181	;simplex	;11181.f1	;11181.m1	;male	;81	NA;395	NA;349
1095	11730.p1||10_115669345_A_G	genome	NDD	autism	10_115669345_A_G	10	115669345	A	G	374354	NHLRC2	+	3'UTR			UTR3	NHLRC2	NM_198514:c.*1050A>G	.	.	.	.	.	.	.	.	.	.	.	.	.	.	.	.	.	SSC	11730.p1	11730	simplex	11730.f1	11730.m1	male	116	350	360
1096	1-0751-003||10_115669890_T_G	genome	NDD	autism	10_115669890_T_G	10	115669890	T	G	374354	NHLRC2	+	3'UTR			UTR3	NHLRC2	NM_198514:c.*1595T>G	.	.	.	.	.	.	.	.	.	.	.	.	.	.	.	.	.	Yuen2017	1-0751-003	FAM_1-0751-003	SPX	1-0751-002	1-0751-001	M		NA	NA
1097	13144.s1||10_115804500_C_A	genome	control	control	10_115804500_C_A	10	115804500	C	A	153	ADRB1	+	CDS			exonic	ADRB1	.	nonsynonymous SNV	ADRB1:NM_000684:exon1:c.C609A:p.S203R	T	B	B	U	N	L	T	N	T	T	D	D	21.2	0.836	0.999	SSC	13144.s1	13144	simplex	13144.f1	13144.m1	male	.	357	417
1098	AU2109301||10_11582288_C_T	genome	NDD	autism	10_11582288_C_T	10	11582288	C	T	9712	USP6NL	-	intron			intronic	USP6NL	.	.	.	.	.	.	.	.	.	.	.	.	.	.	.	.	.	.	Yuen2017	AU2109301	FAM_AU2109302	SPX	AU2109201	AU2109202	M		NA	NA
1099	12501.p1||10_11588327_G_A	genome	NDD	autism	10_11588327_G_A	10	11588327	G	A	9712	USP6NL	-	intron			intronic	USP6NL	.	.	.	.	.	.	.	.	.	.	.	.	.	.	.	.	.	.	SSC	12501.p1	12501	simplex	12501.f1	12501.m1	male	97	532	439
1100	12568.s1||10_115886513_C_A	genome	control	control	10_115886513_C_A	10	115886513	C	A	55088	C10orf118	-	intron			intronic	CCDC186	.	.	.	.	.	.	.	.	.	.	.	.	.	.	.	.	.	.	Turner_2017	12568.s1							NA	NA
1101	14154.p1||10_11588770_C_G	genome	NDD	autism	10_11588770_C_G	10	11588770	C	G	9712	USP6NL	-	intron			intronic	USP6NL	.	.	.	.	.	.	.	.	.	.	.	.	.	.	.	.	.	.	Turner_2017;SSC	14154.p1	;14154	;simplex	;14154.f1	;14154.m1	;male	;104	NA;366	NA;405
1102	gonl-14c||10_115896775_C_A	genome	control	control	10_115896775_C_A	10	115896775	C	A	55088	C10orf118	-	intron	SINE	1	intronic	CCDC186	.	.	.	.	.	.	.	.	.	.	.	.	.	.	.	.	.	.	GONL	gonl-14c							NA	NA
1103	gonl-155c||10_115926641_T_G	genome	control	control	10_115926641_T_G	10	115926641	T	G	55088	C10orf118	-	intron			intronic	CCDC186	.	.	.	.	.	.	.	.	.	.	.	.	.	.	.	.	.	.	GONL	gonl-155c							NA	NA
1104	11220.s1||10_11594300_A_C	genome	control	control	10_11594300_A_C	10	11594300	A	C	9712	USP6NL	-	intron			intronic	USP6NL	.	.	.	.	.	.	.	.	.	.	.	.	.	.	.	.	.	.	SSC	11220.s1	11220	simplex	11220.f1	11220.m1	female	.	338	324
1105	12041.s1||10_115944082_C_T	genome	control	control	10_115944082_C_T	10	115944082	C	T	56165	TDRD1	+	intron			intronic	TDRD1	.	.	.	.	.	.	.	.	.	.	.	.	.	.	.	.	.	.	Turner_2017;SSC	12041.s1	;12041	;simplex	;12041.f1	;12041.m1	;male	;.	NA;402	NA;392
1106	1-0745-003||10_115948476_C_T	genome	NDD	autism	10_115948476_C_T	10	115948476	C	T	56165	TDRD1	+	intron	SINE	1	intronic	TDRD1	.	.	.	.	.	.	.	.	.	.	.	.	.	.	.	.	.	.	Yuen2017	1-0745-003	FAM_1-0745-003	SPX	1-0745-002	1-0745-001	M		NA	NA
1107	12749.p1||10_11595644_G_A	genome	NDD	autism	10_11595644_G_A	10	11595644	G	A	9712	USP6NL	-	intron	SINE	1	intronic	USP6NL	.	.	.	.	.	.	.	.	.	.	.	.	.	.	.	.	.	.	SSC	12749.p1	12749	simplex	12749.f1	12749.m1	male	86	315	310
1108	AU4013303||10_115960945_G_A	genome	NDD	autism	10_115960945_G_A	10	115960945	G	A	56165	TDRD1	+	intron			intronic	TDRD1	.	.	.	.	.	.	.	.	.	.	.	.	.	.	.	.	.	.	Yuen2017	AU4013303	FAM_AU4013303	MPX	AU4013201	AU4013202	M		NA	NA
1109	11492.p1||10_115965773_T_C	genome	NDD	autism	10_115965773_T_C	10	115965773	T	C	56165	TDRD1	+	intron			intronic	TDRD1	.	.	.	.	.	.	.	.	.	.	.	.	.	.	.	.	.	.	SSC	11492.p1	11492	simplex	11492.f1	11492.m1	male	107	375	345
1110	13300.s1||10_115986224_C_A	genome	control	control	10_115986224_C_A	10	115986224	C	A	56165	TDRD1	+	intron	SINE	1	intronic	TDRD1	.	.	.	.	.	.	.	.	.	.	.	.	.	.	.	.	.	.	Turner_2017;SSC	13300.s1	;13300	;simplex	;13300.f1	;13300.m1	;male	;.	NA;369	NA;365
1111	2-1251-003||10_115999613_G_C	genome	NDD	autism	10_115999613_G_C	10	115999613	G	C	340706	VWA2	+	intron			UTR5	VWA2	NM_001320804:c.-8860G>C	.	.	.	.	.	.	.	.	.	.	.	.	.	.	.	.	.	Yuen2017	2-1251-003	FAM_2-1251-003	SPX	2-1251-002	2-1251-001	F		NA	NA
1112	gonl-116c||10_116003483_A_G	genome	control	control	10_116003483_A_G	10	116003483	A	G	340706	VWA2	+	intron			intronic	VWA2	.	.	.	.	.	.	.	.	.	.	.	.	.	.	.	.	.	.	GONL	gonl-116c							NA	NA
1113	13015.p1||10_116013196_C_T	genome	NDD	autism	10_116013196_C_T	10	116013196	C	T	340706	VWA2	+	intron			intronic	VWA2	.	.	.	.	.	.	.	.	.	.	.	.	.	.	.	.	.	.	Turner_2017;SSC	13015.p1	;13015	;simplex	;13015.f1	;13015.m1	;male	;80	NA;394	NA;367
1114	gonl-171c||10_116027729_A_G	genome	control	control	10_116027729_A_G	10	116027729	A	G	340706	VWA2	+	intron			intronic	VWA2	.	.	.	.	.	.	.	.	.	.	.	.	.	.	.	.	.	.	GONL	gonl-171c							NA	NA
1115	13188.p1||10_116035140_A_T	genome	NDD	autism	10_116035140_A_T	10	116035140	A	T	340706	VWA2	+	intron			intronic	VWA2	.	.	.	.	.	.	.	.	.	.	.	.	.	.	.	.	.	.	SSC	13188.p1	13188	simplex	13188.f1	13188.m1	male	72	337	315
1116	13487.s1||10_116038622_C_A	genome	control	control	10_116038622_C_A	10	116038622	C	A	340706	VWA2	+	intron			intronic	VWA2	.	.	.	.	.	.	.	.	.	.	.	.	.	.	.	.	.	.	SSC	13487.s1	13487	simplex	13487.f1	13487.m1	female	.	440	427
1117	14264.p1||10_116043057_C_T	genome	NDD	autism	10_116043057_C_T	10	116043057	C	T	340706	VWA2	+	intron	Simple_repeat	1	intronic	VWA2	.	.	.	.	.	.	.	.	.	.	.	.	.	.	.	.	.	.	SSC	14264.p1	14264	simplex	14264.f1	14264.m1	male	65	462	421
1118	14275.s1||10_116046891_G_A	genome	control	control	10_116046891_G_A	10	116046891	G	A	340706	VWA2	+	intron			intronic	VWA2	.	.	.	.	.	.	.	.	.	.	.	.	.	.	.	.	.	.	SSC	14275.s1	14275	simplex	14275.f1	14275.m1	female	.	343	347
1119	13514.p1||10_116061009_C_T	genome	NDD	autism	10_116061009_C_T	10	116061009	C	T	84632	AFAP1L2	-	intron			intronic	AFAP1L2	.	.	.	.	.	.	.	.	.	.	.	.	.	.	.	.	.	.	Turner_2017;SSC	13514.p1	;13514	;simplex	;13514.f1	;13514.m1	;male	;36	NA;394	NA;364
1120	12529.p1||10_116080534_G_A	genome	NDD	autism	10_116080534_G_A	10	116080534	G	A	84632	AFAP1L2	-	intron			intronic	AFAP1L2	.	.	.	.	.	.	.	.	.	.	.	.	.	.	.	.	.	.	SSC	12529.p1	12529	simplex	12529.f1	12529.m1	male	88	511	427
1121	11471.p1||10_116082909_G_C	genome	NDD	autism	10_116082909_G_C	10	116082909	G	C	84632	AFAP1L2	-	intron			intronic	AFAP1L2	.	.	.	.	.	.	.	.	.	.	.	.	.	.	.	.	.	.	SSC	11471.p1	11471	simplex	11471.f1	11471.m1	male	89	410	303
1122	AU003406||10_116083131_T_C	genome	NDD	autism	10_116083131_T_C	10	116083131	T	C	84632	AFAP1L2	-	intron			intronic	AFAP1L2	.	.	.	.	.	.	.	.	.	.	.	.	.	.	.	.	.	.	Yuen2017	AU003406	FAM_AU003406	MPX	AU003402	AU003401	M		NA	NA
1123	13221.p1||10_116086140_A_T	genome	NDD	autism	10_116086140_A_T	10	116086140	A	T	84632	AFAP1L2	-	intron	LTR	1	intronic	AFAP1L2	.	.	.	.	.	.	.	.	.	.	.	.	.	.	.	.	.	.	Turner_2017;SSC	13221.p1	;13221	;simplex	;13221.f1	;13221.m1	;male	;89	NA;444	NA;407
1124	12749.p1||10_116088333_C_T	genome	NDD	autism	10_116088333_C_T	10	116088333	C	T	84632	AFAP1L2	-	intron			intronic	AFAP1L2	.	.	.	.	.	.	.	.	.	.	.	.	.	.	.	.	.	.	SSC	12749.p1	12749	simplex	12749.f1	12749.m1	male	86	315	310
1125	11966.p1||10_116089151_C_G	genome	NDD	autism	10_116089151_C_G	10	116089151	C	G	84632	AFAP1L2	-	intron			intronic	AFAP1L2	.	.	.	.	.	.	.	.	.	.	.	.	.	.	.	.	.	.	SSC	11966.p1	11966	simplex	11966.f1	11966.m1	male	35	439	514
1126	11307.s1||10_116089176_C_T	genome	control	control	10_116089176_C_T	10	116089176	C	T	84632	AFAP1L2	-	intron			intronic	AFAP1L2	.	.	.	.	.	.	.	.	.	.	.	.	.	.	.	.	.	.	SSC	11307.s1	11307	simplex	11307.f1	11307.m1	male	.	465	451
1127	13614.p1||10_116091378_C_T	genome	NDD	autism	10_116091378_C_T	10	116091378	C	T	84632	AFAP1L2	-	intron			intronic	AFAP1L2	.	.	.	.	.	.	.	.	.	.	.	.	.	.	.	.	.	.	SSC	13614.p1	13614	simplex	13614.f1	13614.m1	male	81	437	470
1128	14675.s1||10_116102310_G_A	genome	control	control	10_116102310_G_A	10	116102310	G	A	84632	AFAP1L2	-	intron	LTR	1	intronic	AFAP1L2	.	.	.	.	.	.	.	.	.	.	.	.	.	.	.	.	.	.	Turner_2017;SSC	14675.s1	;14675	;simplex	;14675.f1	;14675.m1	;female	;.	NA;370	NA;437
1129	5-0133-003||10_116109569_G_A	genome	NDD	autism	10_116109569_G_A	10	116109569	G	A	84632	AFAP1L2	-	intron			intronic	AFAP1L2	.	.	.	.	.	.	.	.	.	.	.	.	.	.	.	.	.	.	Yuen2017	5-0133-003	FAM_5-0133-003	SPX	5-0133-002	5-0133-001	M		NA	NA
1130	13875.s1||10_116109947_T_A	genome	control	control	10_116109947_T_A	10	116109947	T	A	84632	AFAP1L2	-	intron			intronic	AFAP1L2	.	.	.	.	.	.	.	.	.	.	.	.	.	.	.	.	.	.	SSC	13875.s1	13875	simplex	13875.f1	13875.m1	male	.	493	453
1131	14487.p1||10_116114047_T_C	genome	NDD	autism	10_116114047_T_C	10	116114047	T	C	84632	AFAP1L2	-	intron			intronic	AFAP1L2	.	.	.	.	.	.	.	.	.	.	.	.	.	.	.	.	.	.	SSC	14487.p1	14487	simplex	14487.f1	14487.m1	male	101	418	396
1132	14160.s1||10_116124647_G_A	genome	control	control	10_116124647_G_A	10	116124647	G	A	84632	AFAP1L2	-	intron			intronic	AFAP1L2	.	.	.	.	.	.	.	.	.	.	.	.	.	.	.	.	.	.	Turner_2017;SSC	14160.s1	;14160	;simplex	;14160.f1	;14160.m1	;female	;.	NA;335	NA;303
1133	12345.s1||10_116133139_C_A	genome	control	control	10_116133139_C_A	10	116133139	C	A	84632	AFAP1L2	-	intron	SINE	1	intronic	AFAP1L2	.	.	.	.	.	.	.	.	.	.	.	.	.	.	.	.	.	.	SSC	12345.s1	12345	simplex	12345.f1	12345.m1	female	.	469	334
1134	11542.p1||10_116148762_A_G	genome	NDD	autism	10_116148762_A_G	10	116148762	A	G	84632	AFAP1L2	-	intron			intronic	AFAP1L2	.	.	.	.	.	.	.	.	.	.	.	.	.	.	.	.	.	.	Turner_2017;SSC	11542.p1	;11542	;simplex	;11542.f1	;11542.m1	;female	;102	NA;430	NA;429
1135	11178.s1||10_116153503_G_A	genome	control	control	10_116153503_G_A	10	116153503	G	A	84632	AFAP1L2	-	intron			intronic	AFAP1L2	.	.	.	.	.	.	.	.	.	.	.	.	.	.	.	.	.	.	SSC	11178.s1	11178	simplex	11178.f1	11178.m1	male	.	500	361
1136	14386.p1||10_116164208_G_T	genome	NDD	autism	10_116164208_G_T	10	116164208	G	T	84632	AFAP1L2	-	CDS			exonic	AFAP1L2	.	synonymous SNV	AFAP1L2:NM_001001936:exon1:c.C7A:p.R3R,AFAP1L2:NM_001287824:exon1:c.C7A:p.R3R,AFAP1L2:NM_001351064:exon1:c.C7A:p.R3R,AFAP1L2:NM_001351065:exon1:c.C7A:p.R3R,AFAP1L2:NM_001351066:exon1:c.C7A:p.R3R,AFAP1L2:NM_001351067:exon1:c.C7A:p.R3R,AFAP1L2:NM_001351068:exon1:c.C7A:p.R3R,AFAP1L2:NM_001351069:exon1:c.C7A:p.R3R,AFAP1L2:NM_001351074:exon1:c.C7A:p.R3R,AFAP1L2:NM_001351075:exon1:c.C7A:p.R3R,AFAP1L2:N…	.	.	.	.	.	.	.	.	.	.	.	.	.	.	.	SSC	14386.p1	14386	simplex	14386.f1	14386.m1	male	96	495	405
1137	12467.p1||10_11618301_C_A	genome	NDD	autism	10_11618301_C_A	10	11618301	C	A	9712	USP6NL	-	intron			intronic	USP6NL	.	.	.	.	.	.	.	.	.	.	.	.	.	.	.	.	.	.	SSC	12467.p1	12467	simplex	12467.f1	12467.m1	male	102	313	302
1138	2-1644-003||10_116200778_C_T	genome	NDD	autism	10_116200778_C_T	10	116200778	C	T	3983	ABLIM1	-	CDS			exonic	ABLIM1	.	nonsynonymous SNV	ABLIM1:NM_001322900:exon11:c.G785A:p.R262Q,ABLIM1:NM_001322896:exon12:c.G926A:p.R309Q,ABLIM1:NM_001322897:exon12:c.G890A:p.R297Q,ABLIM1:NM_001322898:exon12:c.G863A:p.R288Q,ABLIM1:NM_001322899:exon12:c.G863A:p.R288Q,ABLIM1:NM_001322890:exon13:c.G1010A:p.R337Q,ABLIM1:NM_001322891:exon13:c.G1010A:p.R337Q,ABLIM1:NM_001322892:exon13:c.G1004A:p.R335Q,ABLIM1:NM_001322893:exon13:c.G1004A:p.R335Q,ABLIM1:N…	D	B	B	N	D	L	T	D	T	T	T	D	26.2	0.888	0.591	Yuen2017	2-1644-003	FAM_2-1644-004	MPX	2-1644-002	2-1644-001	F		NA	NA
1139	2-1644-004||10_116200778_C_T	genome	NDD	autism	10_116200778_C_T	10	116200778	C	T	3983	ABLIM1	-	CDS			exonic	ABLIM1	.	nonsynonymous SNV	ABLIM1:NM_001322900:exon11:c.G785A:p.R262Q,ABLIM1:NM_001322896:exon12:c.G926A:p.R309Q,ABLIM1:NM_001322897:exon12:c.G890A:p.R297Q,ABLIM1:NM_001322898:exon12:c.G863A:p.R288Q,ABLIM1:NM_001322899:exon12:c.G863A:p.R288Q,ABLIM1:NM_001322890:exon13:c.G1010A:p.R337Q,ABLIM1:NM_001322891:exon13:c.G1010A:p.R337Q,ABLIM1:NM_001322892:exon13:c.G1004A:p.R335Q,ABLIM1:NM_001322893:exon13:c.G1004A:p.R335Q,ABLIM1:N…	D	B	B	N	D	L	T	D	T	T	T	D	26.2	0.888	0.591	Yuen2017	2-1644-004	FAM_2-1644-004	MPX	2-1644-002	2-1644-001	M		NA	NA
1140	14440.p1||10_116201137_A_G	genome	NDD	autism	10_116201137_A_G	10	116201137	A	G	3983	ABLIM1	-	intron			intronic	ABLIM1	.	.	.	.	.	.	.	.	.	.	.	.	.	.	.	.	.	.	SSC	14440.p1	14440	simplex	14440.f1	14440.m1	male	79	308	305
1141	14204.p1||10_116204976_C_A	genome	NDD	autism	10_116204976_C_A	10	116204976	C	A	3983	ABLIM1	-	intron	LINE	1	intronic	ABLIM1	.	.	.	.	.	.	.	.	.	.	.	.	.	.	.	.	.	.	SSC	14204.p1	14204	simplex	14204.f1	14204.m1	female	57	445	350
1142	13623.s1||10_116214407_G_A	genome	control	control	10_116214407_G_A	10	116214407	G	A	3983	ABLIM1	-	intron			intronic	ABLIM1	.	.	.	.	.	.	.	.	.	.	.	.	.	.	.	.	.	.	SSC	13623.s1	13623	simplex	13623.f1	13623.m1	male	.	439	372
1143	gonl-77c||10_116214780_T_G	genome	control	control	10_116214780_T_G	10	116214780	T	G	3983	ABLIM1	-	intron			intronic	ABLIM1	.	.	.	.	.	.	.	.	.	.	.	.	.	.	.	.	.	.	GONL	gonl-77c							NA	NA
1144	AU076808||10_116219843_A_C	genome	NDD	autism	10_116219843_A_C	10	116219843	A	C	3983	ABLIM1	-	intron			intronic	ABLIM1	.	.	.	.	.	.	.	.	.	.	.	.	.	.	.	.	.	.	Yuen2017	AU076808	FAM_AU076808	SPX	AU076805	AU076803	M		NA	NA
1145	13306.p1||10_116220097_C_T	genome	NDD	autism	10_116220097_C_T	10	116220097	C	T	3983	ABLIM1	-	intron	SINE	1	intronic	ABLIM1	.	.	.	.	.	.	.	.	.	.	.	.	.	.	.	.	.	.	SSC	13306.p1	13306	simplex	13306.f1	13306.m1	male	82	484	399
1146	2-1268-003||10_11622226_T_C	genome	NDD	autism	10_11622226_T_C	10	11622226	T	C	9712	USP6NL	-	intron			intronic	USP6NL	.	.	.	.	.	.	.	.	.	.	.	.	.	.	.	.	.	.	Yuen2016	2-1268-003	FAM_2-1268-003	SPX	2-1268-002	2-1268-001	M		NA	NA
1147	1-0547-003||10_116236672_G_A	genome	NDD	autism	10_116236672_G_A	10	116236672	G	A	3983	ABLIM1	-	intron			intronic	ABLIM1	.	.	.	.	.	.	.	.	.	.	.	.	.	.	.	.	.	.	Yuen2017	1-0547-003	FAM_1-0547-003	SPX	1-0547-002	1-0547-001	M		NA	NA
1148	14596.p1||10_116243101_C_T	genome	NDD	autism	10_116243101_C_T	10	116243101	C	T	3983	ABLIM1	-	intron	SINE	1	intronic	ABLIM1	.	.	.	.	.	.	.	.	.	.	.	.	.	.	.	.	.	.	SSC	14596.p1	14596	simplex	14596.f1	14596.m1	male	102	261	270
1149	14337.s1||10_116244156_T_C	genome	control	control	10_116244156_T_C	10	116244156	T	C	3983	ABLIM1	-	intron	SINE	1	intronic	ABLIM1	.	.	.	.	.	.	.	.	.	.	.	.	.	.	.	.	.	.	SSC	14337.s1	14337	simplex	14337.f1	14337.m1	male	.	514	362
1150	14652.p1||10_116250665_C_T	genome	NDD	autism	10_116250665_C_T	10	116250665	C	T	3983	ABLIM1	-	intron	scRNA	1	intronic	ABLIM1	.	.	.	.	.	.	.	.	.	.	.	.	.	.	.	.	.	.	Turner_2017	14652.p1							NA	NA
1151	2-1562-003||10_116251788_G_A	genome	NDD	autism	10_116251788_G_A	10	116251788	G	A	3983	ABLIM1	-	intron			intronic	ABLIM1	.	.	.	.	.	.	.	.	.	.	.	.	.	.	.	.	.	.	Yuen2017	2-1562-003	FAM_2-1562-004	MPX	2-1562-002	2-1562-001	M		NA	NA
1152	2-1562-004||10_116251788_G_A	genome	NDD	autism	10_116251788_G_A	10	116251788	G	A	3983	ABLIM1	-	intron			intronic	ABLIM1	.	.	.	.	.	.	.	.	.	.	.	.	.	.	.	.	.	.	Yuen2017	2-1562-004	FAM_2-1562-004	MPX	2-1562-002	2-1562-001	M		NA	NA
1153	2-1255-003||10_116256054_T_C	genome	NDD	autism	10_116256054_T_C	10	116256054	T	C	3983	ABLIM1	-	intron	LINE	1	intronic	ABLIM1	.	.	.	.	.	.	.	.	.	.	.	.	.	.	.	.	.	.	Yuen2017	2-1255-003	FAM_2-1255-003	SPX	2-1255-002	2-1255-001	M		NA	NA
1154	14470.p1||10_116260168_A_C	genome	NDD	autism	10_116260168_A_C	10	116260168	A	C	3983	ABLIM1	-	intron	SINE	1	intronic	ABLIM1	.	.	.	.	.	.	.	.	.	.	.	.	.	.	.	.	.	.	SSC	14470.p1	14470	simplex	14470.f1	14470.m1	male	27	414	287
1155	12524.p1||10_116268114_G_A	genome	NDD	autism	10_116268114_G_A	10	116268114	G	A	3983	ABLIM1	-	intron	SINE	1	intronic	ABLIM1	.	.	.	.	.	.	.	.	.	.	.	.	.	.	.	.	.	.	SSC	12524.p1	12524	simplex	12524.f1	12524.m1	female	130	368	333
1156	14595.p1||10_116271004_C_T	genome	NDD	autism	10_116271004_C_T	10	116271004	C	T	3983	ABLIM1	-	intron			intronic	ABLIM1	.	.	.	.	.	.	.	.	.	.	.	.	.	.	.	.	.	.	SSC	14595.p1	14595	simplex	14595.f1	14595.m1	male	79	356	317
1157	12510.s1||10_11627164_T_A	genome	control	control	10_11627164_T_A	10	11627164	T	A	9712	USP6NL	-	intron	LINE	1	intronic	USP6NL	.	.	.	.	.	.	.	.	.	.	.	.	.	.	.	.	.	.	SSC	12510.s1	12510	simplex	12510.f1	12510.m1	male	.	600	518
1158	2-0323-004||10_116272692_A_C	genome	NDD	autism	10_116272692_A_C	10	116272692	A	C	3983	ABLIM1	-	intron	Simple_repeat	1	intronic	ABLIM1	.	.	.	.	.	.	.	.	.	.	.	.	.	.	.	.	.	.	Yuen2017	2-0323-004	FAM_2-0323-004	MPX	2-0323-002	2-0323-001	M		NA	NA
1159	2-1356-003||10_116275090_G_A	genome	NDD	autism	10_116275090_G_A	10	116275090	G	A	3983	ABLIM1	-	intron			intronic	ABLIM1	.	.	.	.	.	.	.	.	.	.	.	.	.	.	.	.	.	.	Yuen2017	2-1356-003	FAM_2-1356-003	SPX	2-1356-002	2-1356-001	M		NA	NA
1160	13962.p1||10_116277285_A_G	genome	NDD	autism	10_116277285_A_G	10	116277285	A	G	3983	ABLIM1	-	intron	LTR	1	intronic	ABLIM1	.	.	.	.	.	.	.	.	.	.	.	.	.	.	.	.	.	.	SSC	13962.p1	13962	simplex	13962.f1	13962.m1	male	91	396	394
1161	13423.p1||10_116283008_C_T	genome	NDD	autism	10_116283008_C_T	10	116283008	C	T	3983	ABLIM1	-	intron			intronic	ABLIM1	.	.	.	.	.	.	.	.	.	.	.	.	.	.	.	.	.	.	SSC	13423.p1	13423	simplex	13423.f1	13423.m1	male	96	440	409
1162	AU015903||10_116291564_C_T	genome	NDD	autism	10_116291564_C_T	10	116291564	C	T	3983	ABLIM1	-	intron	SINE	1	intronic	ABLIM1	.	.	.	.	.	.	.	.	.	.	.	.	.	.	.	.	.	.	Yuen2017	AU015903	FAM_AU015903	SPX	AU015902	AU015901	M		NA	NA
1163	13808.p1||10_116298938_G_A	genome	NDD	autism	10_116298938_G_A	10	116298938	G	A	3983	ABLIM1	-	intron	SINE	1	intronic	ABLIM1	.	.	.	.	.	.	.	.	.	.	.	.	.	.	.	.	.	.	Turner_2017	13808.p1							NA	NA
1164	11181.p1||10_116308143_G_A	genome	NDD	autism	10_116308143_G_A	10	116308143	G	A	3983	ABLIM1	-	intron	SINE	1	intronic	ABLIM1	.	.	.	.	.	.	.	.	.	.	.	.	.	.	.	.	.	.	Turner_2017;SSC	11181.p1	;11181	;simplex	;11181.f1	;11181.m1	;male	;81	NA;395	NA;349
1165	1-1004-003||10_116318904_C_T	genome	NDD	autism	10_116318904_C_T	10	116318904	C	T	3983	ABLIM1	-	intron			intronic	ABLIM1	.	.	.	.	.	.	.	.	.	.	.	.	.	.	.	.	.	.	Yuen2017	1-1004-003	FAM_1-1004-003	SPX	1-1004-002	1-1004-001	M		NA	NA
1166	12534.p1||10_116332073_G_A	genome	NDD	autism	10_116332073_G_A	10	116332073	G	A	3983	ABLIM1	-	intron			intronic	ABLIM1	.	.	.	.	.	.	.	.	.	.	.	.	.	.	.	.	.	.	SSC	12534.p1	12534	simplex	12534.f1	12534.m1	female	83	366	298
1167	12727.p1||10_116353116_T_C	genome	NDD	autism	10_116353116_T_C	10	116353116	T	C	3983	ABLIM1	-	intron	LTR	1	intronic	ABLIM1	.	.	.	.	.	.	.	.	.	.	.	.	.	.	.	.	.	.	SSC	12727.p1	12727	simplex	12727.f1	12727.m1	male	105	405	291
1168	12383.p1||10_116357665_C_T	genome	NDD	autism	10_116357665_C_T	10	116357665	C	T	3983	ABLIM1	-	intron			intronic	ABLIM1	.	.	.	.	.	.	.	.	.	.	.	.	.	.	.	.	.	.	SSC	12383.p1	12383	simplex	12383.f1	12383.m1	male	88	333	303
1169	13456.s1||10_116364194_T_C	genome	control	control	10_116364194_T_C	10	116364194	T	C	3983	ABLIM1	-	intron			intronic	ABLIM1	.	.	.	.	.	.	.	.	.	.	.	.	.	.	.	.	.	.	SSC	13456.s1	13456	simplex	13456.f1	13456.m1	female	.	382	413
1170	13063.p1||10_116367649_G_A	genome	NDD	autism	10_116367649_G_A	10	116367649	G	A	3983	ABLIM1	-	intron	LINE	1	intronic	ABLIM1	.	.	.	.	.	.	.	.	.	.	.	.	.	.	.	.	.	.	Turner_2017	13063.p1							NA	NA
1171	13920.s1||10_116369004_C_T	genome	control	control	10_116369004_C_T	10	116369004	C	T	3983	ABLIM1	-	intron			intronic	ABLIM1	.	.	.	.	.	.	.	.	.	.	.	.	.	.	.	.	.	.	SSC	13920.s1	13920	simplex	13920.f1	13920.m1	female	.	336	287
1172	13251.s1||10_116374478_A_G	genome	control	control	10_116374478_A_G	10	116374478	A	G	3983	ABLIM1	-	intron			intronic	ABLIM1	.	.	.	.	.	.	.	.	.	.	.	.	.	.	.	.	.	.	Turner_2017;SSC	13251.s1	;13251	;simplex	;13251.f1	;13251.m1	;female	;.	NA;436	NA;415
1173	2-0296-004||10_116386186_C_T	genome	NDD	autism	10_116386186_C_T	10	116386186	C	T	3983	ABLIM1	-	intron			intronic	ABLIM1	.	.	.	.	.	.	.	.	.	.	.	.	.	.	.	.	.	.	Yuen2017	2-0296-004	FAM_2-0296-004	MPX	2-0296-002	2-0296-001	M		NA	NA
1174	13514.p1||10_1163875_A_G	genome	NDD	autism	10_1163875_A_G	10	1163875	A	G	22884	WDR37	+	intron			intronic	WDR37	.	.	.	.	.	.	.	.	.	.	.	.	.	.	.	.	.	.	Turner_2017	13514.p1							NA	NA
1175	14587.s1||10_116388791_C_T	genome	control	control	10_116388791_C_T	10	116388791	C	T	3983	ABLIM1	-	intron			intronic	ABLIM1	.	.	.	.	.	.	.	.	.	.	.	.	.	.	.	.	.	.	SSC	14587.s1	14587	simplex	14587.f1	14587.m1	male	.	404	322
1176	12857.s1||10_116391956_T_A	genome	control	control	10_116391956_T_A	10	116391956	T	A	3983	ABLIM1	-	5'UTR			intronic	ABLIM1	.	.	.	.	.	.	.	.	.	.	.	.	.	.	.	.	.	.	Turner_2017;SSC	12857.s1	;12857	;simplex	;12857.f1	;12857.m1	;male	;.	NA;397	NA;375
1177	5-0099-003||10_116403029_C_T	genome	NDD	autism	10_116403029_C_T	10	116403029	C	T	3983	ABLIM1	-	intron	LINE	1	intronic	ABLIM1	.	.	.	.	.	.	.	.	.	.	.	.	.	.	.	.	.	.	Yuen2017	5-0099-003	FAM_5-0099-003	SPX	5-0099-002	5-0099-001	F		NA	NA
1178	5-0114-003||10_116407725_T_A	genome	NDD	autism	10_116407725_T_A	10	116407725	T	A	3983	ABLIM1	-	intron			intronic	ABLIM1	.	.	.	.	.	.	.	.	.	.	.	.	.	.	.	.	.	.	Yuen2017	5-0114-003	FAM_5-0114-003	SPX	5-0114-002	5-0114-001	M		NA	NA
1179	11940.p1||10_116417626_A_T	genome	NDD	autism	10_116417626_A_T	10	116417626	A	T	3983	ABLIM1	-	intron			intronic	ABLIM1	.	.	.	.	.	.	.	.	.	.	.	.	.	.	.	.	.	.	SSC	11940.p1	11940	simplex	11940.f1	11940.m1	female	109	488	476
1180	1-0563-004||10_116441277_A_G	genome	NDD	autism	10_116441277_A_G	10	116441277	A	G	3983	ABLIM1	-	intron			intronic	ABLIM1	.	.	.	.	.	.	.	.	.	.	.	.	.	.	.	.	.	.	Yuen2017	1-0563-004	FAM_1-0563-004	MPX	1-0563-002	1-0563-001	M		NA	NA
1181	14536.s1||10_11648643_G_A	genome	control	control	10_11648643_G_A	10	11648643	G	A	9712	USP6NL	-	intron	LINE	1	intronic	USP6NL	.	.	.	.	.	.	.	.	.	.	.	.	.	.	.	.	.	.	SSC	14536.s1	14536	simplex	14536.f1	14536.m1	female	.	300	286
1182	gonl-114c||10_11649677_C_A	genome	control	control	10_11649677_C_A	10	11649677	C	A	9712	USP6NL	-	intron	SINE	1	intronic	USP6NL	.	.	.	.	.	.	.	.	.	.	.	.	.	.	.	.	.	.	GONL	gonl-114c							NA	NA
1183	14120.p1||10_116529079_G_A	genome	NDD	autism	10_116529079_G_A	10	116529079	G	A			+	intron	SINE	1	ncRNA_intronic	LOC101927692	.	.	.	.	.	.	.	.	.	.	.	.	.	.	.	.	.	.	SSC	14120.p1	14120	simplex	14120.f1	14120.m1	male	106	544	474
1184	12481.p1||10_116595301_T_A	genome	NDD	autism	10_116595301_T_A	10	116595301	T	A	57700	FAM160B1	+	CDS			exonic	FAM160B1	.	synonymous SNV	FAM160B1:NM_001135051:exon4:c.T300A:p.P100P,FAM160B1:NM_020940:exon4:c.T300A:p.P100P	.	.	.	.	.	.	.	.	.	.	.	.	.	.	.	Turner_2017;SSC	12481.p1	;12481	;simplex	;12481.f1	;12481.m1	;male	;47	NA;473	NA;404
1185	AU003405||10_116595770_G_T	genome	NDD	autism	10_116595770_G_T	10	116595770	G	T	57700	FAM160B1	+	intron			intronic	FAM160B1	.	.	.	.	.	.	.	.	.	.	.	.	.	.	.	.	.	.	Yuen2017	AU003405	FAM_AU003406	MPX	AU003402	AU003401	M		NA	NA
1186	AU4072303||10_116606543_T_C	genome	NDD	autism	10_116606543_T_C	10	116606543	T	C	57700	FAM160B1	+	intron			intronic	FAM160B1	.	.	.	.	.	.	.	.	.	.	.	.	.	.	.	.	.	.	Yuen2017	AU4072303	FAM_AU4072303	SPX	AU4072201	AU4072202	M		NA	NA
1187	12271.s1||10_116607592_G_A	genome	control	control	10_116607592_G_A	10	116607592	G	A	57700	FAM160B1	+	intron	SINE	1	intronic	FAM160B1	.	.	.	.	.	.	.	.	.	.	.	.	.	.	.	.	.	.	Turner_2017	12271.s1							NA	NA
1188	11207.s1||10_116622819_T_C	genome	control	control	10_116622819_T_C	10	116622819	T	C	57700	FAM160B1	+	3'UTR			UTR3	FAM160B1	NM_020940:c.*1520T>C	.	.	.	.	.	.	.	.	.	.	.	.	.	.	.	.	.	SSC	11207.s1	11207	simplex	11207.f1	11207.m1	female	.	312	308
1189	14358.s1||10_116623277_G_A	genome	control	control	10_116623277_G_A	10	116623277	G	A	57700	FAM160B1	+	3'UTR			UTR3	FAM160B1	NM_020940:c.*1978G>A	.	.	.	.	.	.	.	.	.	.	.	.	.	.	.	.	.	SSC	14358.s1	14358	simplex	14358.f1	14358.m1	female	.	366	416
1190	13521.s1||10_116639370_G_A	genome	control	control	10_116639370_G_A	10	116639370	G	A	57700	FAM160B1	+	intron			intronic	FAM160B1	.	.	.	.	.	.	.	.	.	.	.	.	.	.	.	.	.	.	SSC	13521.s1	13521	simplex	13521.f1	13521.m1	female	.	403	394
1191	13534.s1||10_116641286_T_C	genome	control	control	10_116641286_T_C	10	116641286	T	C	57700	FAM160B1	+	intron	SINE	1	intronic	FAM160B1	.	.	.	.	.	.	.	.	.	.	.	.	.	.	.	.	.	.	SSC	13534.s1	13534	simplex	13534.f1	13534.m1	male	.	459	461
1192	12795.s1||10_116643988_C_G	genome	control	control	10_116643988_C_G	10	116643988	C	G	57700	FAM160B1	+	intron			intronic	FAM160B1	.	.	.	.	.	.	.	.	.	.	.	.	.	.	.	.	.	.	Turner_2017;SSC	12795.s1	;12795	;simplex	;12795.f1	;12795.m1	;male	;.	NA;517	NA;406
1193	11071.p1||10_116649384_C_G	genome	NDD	autism	10_116649384_C_G	10	116649384	C	G	57700	FAM160B1	+	intron	LTR	1	intronic	FAM160B1	.	.	.	.	.	.	.	.	.	.	.	.	.	.	.	.	.	.	SSC	11071.p1	11071	simplex	11071.f1	11071.m1	female	63	425	433
1194	12083.s1||10_116649828_C_T	genome	control	control	10_116649828_C_T	10	116649828	C	T	57700	FAM160B1	+	intron	SINE	1	intronic	FAM160B1	.	.	.	.	.	.	.	.	.	.	.	.	.	.	.	.	.	.	SSC	12083.s1	12083	simplex	12083.f1	12083.m1	female	.	384	381
1195	1-0357-003||10_116700695_G_A	genome	NDD	autism	10_116700695_G_A	10	116700695	G	A	142940	TRUB1	+	intron			intronic	TRUB1	.	.	.	.	.	.	.	.	.	.	.	.	.	.	.	.	.	.	Yuen2017	1-0357-003	FAM_1-0357-003	SPX	1-0357-002	1-0357-001	M		NA	NA
1196	AU061104||10_116708531_A_G	genome	NDD	autism	10_116708531_A_G	10	116708531	A	G	142940	TRUB1	+	intron	LINE	1	intronic	TRUB1	.	.	.	.	.	.	.	.	.	.	.	.	.	.	.	.	.	.	Yuen2017	AU061104	FAM_AU061104	MPX	AU061102	AU061101	M		NA	NA
1197	AU2100302||10_116710524_G_A	genome	NDD	autism	10_116710524_G_A	10	116710524	G	A	142940	TRUB1	+	intron			intronic	TRUB1	.	.	.	.	.	.	.	.	.	.	.	.	.	.	.	.	.	.	Yuen2017	AU2100302	FAM_AU2100302	SPX	AU2100201	AU2100203	M		NA	NA
1198	12219.p1||10_116715824_T_G	genome	NDD	autism	10_116715824_T_G	10	116715824	T	G	142940	TRUB1	+	intron			intronic	TRUB1	.	.	.	.	.	.	.	.	.	.	.	.	.	.	.	.	.	.	SSC	12219.p1	12219	simplex	12219.f1	12219.m1	male	110	526	453
1199	14675.p1||10_116730168_T_C	genome	NDD	autism	10_116730168_T_C	10	116730168	T	C	142940	TRUB1	+	CDS			exonic	TRUB1	.	nonsynonymous SNV	TRUB1:NM_139169:exon5:c.T565C:p.F189L	D	D	D	D	D	L	T	D	T	T	T	D	32	1.061	1	Turner_2017;SSC	14675.p1	;14675	;simplex	;14675.f1	;14675.m1	;male	;90	NA;327	NA;394
1200	12550.s1||10_116854281_C_A	genome	control	control	10_116854281_C_A	10	116854281	C	A	26033	ATRNL1	+	intron			intronic	ATRNL1	.	.	.	.	.	.	.	.	.	.	.	.	.	.	.	.	.	.	SSC	12550.s1	12550	simplex	12550.f1	12550.m1	female	.	512	408
1201	14404.p1||10_116877321_A_G	genome	NDD	autism	10_116877321_A_G	10	116877321	A	G	26033	ATRNL1	+	intron	LINE	1	intronic	ATRNL1	.	.	.	.	.	.	.	.	.	.	.	.	.	.	.	.	.	.	Turner_2017;SSC	14404.p1	;14404	;simplex	;14404.f1	;14404.m1	;male	;20	NA;463	NA;433
1202	1-0303-004||10_116879630_A_G	genome	NDD	autism	10_116879630_A_G	10	116879630	A	G	26033	ATRNL1	+	intron			intronic	ATRNL1	.	.	.	.	.	.	.	.	.	.	.	.	.	.	.	.	.	.	Yuen2017	1-0303-004	FAM_1-0303-004	MPX	1-0303-002	1-0303-001	M		NA	NA
1203	12299.p1||10_116882794_G_C	genome	NDD	autism	10_116882794_G_C	10	116882794	G	C	26033	ATRNL1	+	intron			intronic	ATRNL1	.	.	.	.	.	.	.	.	.	.	.	.	.	.	.	.	.	.	SSC	12299.p1	12299	simplex	12299.f1	12299.m1	male	113	431	376
1204	12449.p1||10_1169044_C_G	genome	NDD	autism	10_1169044_C_G	10	1169044	C	G	22884	WDR37	+	intron			intronic	WDR37	.	.	.	.	.	.	.	.	.	.	.	.	.	.	.	.	.	.	Turner_2017;SSC	12449.p1	;12449	;simplex	;12449.f1	;12449.m1	;male	;87	NA;515	NA;366
1205	12418.s1||10_116928261_C_T	genome	control	control	10_116928261_C_T	10	116928261	C	T	26033	ATRNL1	+	intron	LINE	1	intronic	ATRNL1	.	.	.	.	.	.	.	.	.	.	.	.	.	.	.	.	.	.	SSC	12418.s1	12418	simplex	12418.f1	12418.m1	male	.	495	335
1206	14357.p1||10_116934624_A_G	genome	NDD	autism	10_116934624_A_G	10	116934624	A	G	26033	ATRNL1	+	intron			intronic	ATRNL1	.	.	.	.	.	.	.	.	.	.	.	.	.	.	.	.	.	.	SSC	14357.p1	14357	simplex	14357.f1	14357.m1	male	32	434	425
1207	2-1384-003||10_116946458_T_G	genome	NDD	autism	10_116946458_T_G	10	116946458	T	G	26033	ATRNL1	+	intron	LINE	1	intronic	ATRNL1	.	.	.	.	.	.	.	.	.	.	.	.	.	.	.	.	.	.	Yuen2017	2-1384-003	FAM_2-1384-003	SPX	2-1384-002	2-1384-001	M		NA	NA
1208	14378.p1||10_116950643_C_T	genome	NDD	autism	10_116950643_C_T	10	116950643	C	T	26033	ATRNL1	+	intron	LINE	1	intronic	ATRNL1	.	.	.	.	.	.	.	.	.	.	.	.	.	.	.	.	.	.	SSC	14378.p1	14378	simplex	14378.f1	14378.m1	male	63	443	424
1209	14404.p1||10_116968061_G_A	genome	NDD	autism	10_116968061_G_A	10	116968061	G	A	26033	ATRNL1	+	intron	LINE	1	intronic	ATRNL1	.	.	.	.	.	.	.	.	.	.	.	.	.	.	.	.	.	.	Turner_2017;SSC	14404.p1	;14404	;simplex	;14404.f1	;14404.m1	;male	;20	NA;463	NA;433
1210	12707.p1||10_116981333_A_G	genome	NDD	autism	10_116981333_A_G	10	116981333	A	G	26033	ATRNL1	+	intron	LINE	1	intronic	ATRNL1	.	.	.	.	.	.	.	.	.	.	.	.	.	.	.	.	.	.	SSC	12707.p1	12707	simplex	12707.f1	12707.m1	male	90	352	339
1211	14135.p1||10_116989096_T_G	genome	NDD	autism	10_116989096_T_G	10	116989096	T	G	26033	ATRNL1	+	intron			intronic	ATRNL1	.	.	.	.	.	.	.	.	.	.	.	.	.	.	.	.	.	.	SSC	14135.p1	14135	simplex	14135.f1	14135.m1	male	82	398	412
1212	13107.s1||10_116991575_T_C	genome	control	control	10_116991575_T_C	10	116991575	T	C	26033	ATRNL1	+	intron	LINE	1	intronic	ATRNL1	.	.	.	.	.	.	.	.	.	.	.	.	.	.	.	.	.	.	SSC	13107.s1	13107	simplex	13107.f1	13107.m1	male	.	410	422
1213	gonl-227c||10_116991655_A_T	genome	control	control	10_116991655_A_T	10	116991655	A	T	26033	ATRNL1	+	intron	LINE	1	intronic	ATRNL1	.	.	.	.	.	.	.	.	.	.	.	.	.	.	.	.	.	.	GONL	gonl-227c							NA	NA
1214	14491.s1||10_117005145_G_A	genome	control	control	10_117005145_G_A	10	117005145	G	A	26033	ATRNL1	+	intron	SINE	1	intronic	ATRNL1	.	.	.	.	.	.	.	.	.	.	.	.	.	.	.	.	.	.	SSC	14491.s1	14491	simplex	14491.f1	14491.m1	male	.	362	343
1215	14213.p1||10_117016675_T_C	genome	NDD	autism	10_117016675_T_C	10	117016675	T	C	26033	ATRNL1	+	intron	LINE	1	intronic	ATRNL1	.	.	.	.	.	.	.	.	.	.	.	.	.	.	.	.	.	.	SSC	14213.p1	14213	simplex	14213.f1	14213.m1	male	33	456	417
1216	AU2427303||10_117028524_A_G	genome	NDD	autism	10_117028524_A_G	10	117028524	A	G	26033	ATRNL1	+	intron			intronic	ATRNL1	.	.	.	.	.	.	.	.	.	.	.	.	.	.	.	.	.	.	Yuen2017	AU2427303	FAM_AU2427303	MPX	AU2427201	AU2427202	M		NA	NA
1217	13585.p1||10_117039306_A_C	genome	NDD	autism	10_117039306_A_C	10	117039306	A	C	26033	ATRNL1	+	intron	LTR	1	intronic	ATRNL1	.	.	.	.	.	.	.	.	.	.	.	.	.	.	.	.	.	.	SSC	13585.p1	13585	simplex	13585.f1	13585.m1	male	65	453	366
1218	14406.p1||10_117051150_A_G	genome	NDD	autism	10_117051150_A_G	10	117051150	A	G	26033	ATRNL1	+	intron	LINE	1	intronic	ATRNL1	.	.	.	.	.	.	.	.	.	.	.	.	.	.	.	.	.	.	SSC	14406.p1	14406	simplex	14406.f1	14406.m1	male	98	315	321
1219	11433.s1||10_117051193_C_A	genome	control	control	10_117051193_C_A	10	117051193	C	A	26033	ATRNL1	+	intron	LINE	1	intronic	ATRNL1	.	.	.	.	.	.	.	.	.	.	.	.	.	.	.	.	.	.	SSC	11433.s1	11433	simplex	11433.f1	11433.m1	female	.	461	425
1220	13925.p1||10_117055466_C_T	genome	NDD	autism	10_117055466_C_T	10	117055466	C	T	26033	ATRNL1	+	intron	LINE	1	intronic	ATRNL1	.	.	.	.	.	.	.	.	.	.	.	.	.	.	.	.	.	.	SSC	13925.p1	13925	simplex	13925.f1	13925.m1	male	94	368	367
1221	14051.s1||10_117074916_A_G	genome	control	control	10_117074916_A_G	10	117074916	A	G	26033	ATRNL1	+	intron			intronic	ATRNL1	.	.	.	.	.	.	.	.	.	.	.	.	.	.	.	.	.	.	SSC	14051.s1	14051	simplex	14051.f1	14051.m1	male	.	434	412
1222	13673.s1||10_117092437_T_G	genome	control	control	10_117092437_T_G	10	117092437	T	G	26033	ATRNL1	+	intron	SINE	1	intronic	ATRNL1	.	.	.	.	.	.	.	.	.	.	.	.	.	.	.	.	.	.	SSC	13673.s1	13673	simplex	13673.f1	13673.m1	male	.	408	385
1223	AU1725306||10_117094958_A_G	genome	NDD	autism	10_117094958_A_G	10	117094958	A	G	26033	ATRNL1	+	intron	DNA	1	intronic	ATRNL1	.	.	.	.	.	.	.	.	.	.	.	.	.	.	.	.	.	.	Yuen2017	AU1725306	FAM_AU1725306	MPX	AU1725201	AU1725202	M		NA	NA
1224	AU2410302||10_117107978_G_C	genome	NDD	autism	10_117107978_G_C	10	117107978	G	C	26033	ATRNL1	+	intron			intronic	ATRNL1	.	.	.	.	.	.	.	.	.	.	.	.	.	.	.	.	.	.	Yuen2017	AU2410302	FAM_AU2410302	MPX	AU2410201	AU2410202	F		NA	NA
1225	12407.p1||10_117108602_C_A	genome	NDD	autism	10_117108602_C_A	10	117108602	C	A	26033	ATRNL1	+	intron	LINE	1	intronic	ATRNL1	.	.	.	.	.	.	.	.	.	.	.	.	.	.	.	.	.	.	Turner_2017;SSC	12407.p1	;12407	;simplex	;12407.f1	;12407.m1	;male	;86	NA;319	NA;273
1226	13097.s1||10_117118645_C_T	genome	control	control	10_117118645_C_T	10	117118645	C	T	26033	ATRNL1	+	intron			intronic	ATRNL1	.	.	.	.	.	.	.	.	.	.	.	.	.	.	.	.	.	.	SSC	13097.s1	13097	simplex	13097.f1	13097.m1	female	.	444	387
1227	13023.p1||10_117122595_G_C	genome	NDD	autism	10_117122595_G_C	10	117122595	G	C	26033	ATRNL1	+	intron	LINE	1	intronic	ATRNL1	.	.	.	.	.	.	.	.	.	.	.	.	.	.	.	.	.	.	Turner_2017	13023.p1							NA	NA
1228	12518.p1||10_117123627_G_C	genome	NDD	autism	10_117123627_G_C	10	117123627	G	C	26033	ATRNL1	+	intron	LINE	1	intronic	ATRNL1	.	.	.	.	.	.	.	.	.	.	.	.	.	.	.	.	.	.	Turner_2017	12518.p1							NA	NA
1229	13823.p1||10_117123627_G_C	genome	NDD	autism	10_117123627_G_C	10	117123627	G	C	26033	ATRNL1	+	intron	LINE	1	intronic	ATRNL1	.	.	.	.	.	.	.	.	.	.	.	.	.	.	.	.	.	.	Turner_2017	13823.p1							NA	NA
1230	13542.p1||10_117123805_T_G	genome	NDD	autism	10_117123805_T_G	10	117123805	T	G	26033	ATRNL1	+	intron	LINE	1	intronic	ATRNL1	.	.	.	.	.	.	.	.	.	.	.	.	.	.	.	.	.	.	Turner_2017	13542.p1							NA	NA
1231	11941.s1||10_117126398_A_G	genome	control	control	10_117126398_A_G	10	117126398	A	G	26033	ATRNL1	+	intron	LINE	1	intronic	ATRNL1	.	.	.	.	.	.	.	.	.	.	.	.	.	.	.	.	.	.	Turner_2017	11941.s1							NA	NA
1232	11645.s1||10_117126585_G_A	genome	control	control	10_117126585_G_A	10	117126585	G	A	26033	ATRNL1	+	intron	LINE	1	intronic	ATRNL1	.	.	.	.	.	.	.	.	.	.	.	.	.	.	.	.	.	.	Turner_2017	11645.s1							NA	NA
1233	14594.p1||10_117126901_C_T	genome	NDD	autism	10_117126901_C_T	10	117126901	C	T	26033	ATRNL1	+	intron	LINE	1	intronic	ATRNL1	.	.	.	.	.	.	.	.	.	.	.	.	.	.	.	.	.	.	Turner_2017	14594.p1							NA	NA
1234	11083.p1||10_117128325_G_A	genome	NDD	autism	10_117128325_G_A	10	117128325	G	A	26033	ATRNL1	+	intron	SINE	1	intronic	ATRNL1	.	.	.	.	.	.	.	.	.	.	.	.	.	.	.	.	.	.	SSC	11083.p1	11083	simplex	11083.f1	11083.m1	male	119	467	365
1235	13185.p1||10_117131385_C_T	genome	NDD	autism	10_117131385_C_T	10	117131385	C	T	26033	ATRNL1	+	intron	LTR	1	intronic	ATRNL1	.	.	.	.	.	.	.	.	.	.	.	.	.	.	.	.	.	.	Turner2016	13185.p1							NA	NA
1236	11920.s1||10_117166276_G_A	genome	control	control	10_117166276_G_A	10	117166276	G	A	26033	ATRNL1	+	intron	LINE	1	intronic	ATRNL1	.	.	.	.	.	.	.	.	.	.	.	.	.	.	.	.	.	.	SSC	11920.s1	11920	simplex	11920.f1	11920.m1	male	.	343	357
1237	12701.s1||10_117167932_T_C	genome	control	control	10_117167932_T_C	10	117167932	T	C	26033	ATRNL1	+	intron	LINE	1	intronic	ATRNL1	.	.	.	.	.	.	.	.	.	.	.	.	.	.	.	.	.	.	SSC	12701.s1	12701	simplex	12701.f1	12701.m1	male	.	233	228
1238	14658.s1||10_117173064_T_C	genome	control	control	10_117173064_T_C	10	117173064	T	C	26033	ATRNL1	+	intron	LINE	1	intronic	ATRNL1	.	.	.	.	.	.	.	.	.	.	.	.	.	.	.	.	.	.	Turner_2017;SSC	14658.s1	;14658	;simplex	;14658.f1	;14658.m1	;male	;.	NA;295	NA;247
1239	22315.p1||10_117181119_T_G	genome	NDD	autism	10_117181119_T_G	10	117181119	T	G	26033	ATRNL1	+	intron	LINE	1	intronic	ATRNL1	.	.	.	.	.	.	.	.	.	.	.	.	.	.	.	.	.	.	SSC	22315.p1	KOR-315	simplex	KOR-315.f1	KOR-315.m1	female		415	419
1240	12456.s1||10_117182773_G_A	genome	control	control	10_117182773_G_A	10	117182773	G	A	26033	ATRNL1	+	intron	SINE	1	intronic	ATRNL1	.	.	.	.	.	.	.	.	.	.	.	.	.	.	.	.	.	.	SSC	12456.s1	12456	simplex	12456.f1	12456.m1	male	.	404	321
1241	1-0299-003||10_117182797_A_T	genome	NDD	autism	10_117182797_A_T	10	117182797	A	T	26033	ATRNL1	+	intron	SINE	1	intronic	ATRNL1	.	.	.	.	.	.	.	.	.	.	.	.	.	.	.	.	.	.	Yuen2017	1-0299-003	FAM_1-0299-005	MPX	1-0299-002	1-0299-001	M		NA	NA
1242	2-0296-004||10_117184669_T_C	genome	NDD	autism	10_117184669_T_C	10	117184669	T	C	26033	ATRNL1	+	intron			intronic	ATRNL1	.	.	.	.	.	.	.	.	.	.	.	.	.	.	.	.	.	.	Yuen2017	2-0296-004	FAM_2-0296-004	MPX	2-0296-002	2-0296-001	M		NA	NA
1243	14335.p1||10_117184782_C_A	genome	NDD	autism	10_117184782_C_A	10	117184782	C	A	26033	ATRNL1	+	intron			intronic	ATRNL1	.	.	.	.	.	.	.	.	.	.	.	.	.	.	.	.	.	.	SSC	14335.p1	14335	simplex	14335.f1	14335.m1	male	96	374	433
1244	12859.p1||10_117191802_A_G	genome	NDD	autism	10_117191802_A_G	10	117191802	A	G	26033	ATRNL1	+	intron	DNA	1	intronic	ATRNL1	.	.	.	.	.	.	.	.	.	.	.	.	.	.	.	.	.	.	Turner_2017;SSC	12859.p1	;12859	;simplex	;12859.f1	;12859.m1	;male	;56	NA;449	NA;453
1245	13314.p1||10_1172116_C_T	genome	NDD	autism	10_1172116_C_T	10	1172116	C	T	22884	WDR37	+	intron	SINE	1	intronic	WDR37	.	.	.	.	.	.	.	.	.	.	.	.	.	.	.	.	.	.	Turner_2017	13314.p1							NA	NA
1246	14470.s1||10_1172478_G_A	genome	control	control	10_1172478_G_A	10	1172478	G	A	22884	WDR37	+	intron			intronic	WDR37	.	.	.	.	.	.	.	.	.	.	.	.	.	.	.	.	.	.	SSC	14470.s1	14470	simplex	14470.f1	14470.m1	female	.	436	309
1247	12674.s1||10_117253743_G_T	genome	control	control	10_117253743_G_T	10	117253743	G	T	26033	ATRNL1	+	intron	LINE	1	intronic	ATRNL1	.	.	.	.	.	.	.	.	.	.	.	.	.	.	.	.	.	.	SSC	12674.s1	12674	simplex	12674.f1	12674.m1	female	.	421	351
1248	13050.p1||10_117269657_G_T	genome	NDD	autism	10_117269657_G_T	10	117269657	G	T	26033	ATRNL1	+	intron	DNA	1	intronic	ATRNL1	.	.	.	.	.	.	.	.	.	.	.	.	.	.	.	.	.	.	SSC	13050.p1	13050	simplex	13050.f1	13050.m1	male	93	443	329
1249	1-0551-004||10_117281490_C_T	genome	NDD	autism	10_117281490_C_T	10	117281490	C	T	26033	ATRNL1	+	intron			intronic	ATRNL1	.	.	.	.	.	.	.	.	.	.	.	.	.	.	.	.	.	.	Yuen2017	1-0551-004	FAM_1-0551-004	MPX	1-0551-002	1-0551-001	M		NA	NA
1250	12060.s1||10_117282917_A_G	genome	control	control	10_117282917_A_G	10	117282917	A	G	26033	ATRNL1	+	intron	LTR	1	intronic	ATRNL1	.	.	.	.	.	.	.	.	.	.	.	.	.	.	.	.	.	.	Turner_2017;SSC	12060.s1	;12060	;simplex	;12060.f1	;12060.m1	;female	;.	NA;317	NA;258
1251	11432.s1||10_117288548_C_G	genome	control	control	10_117288548_C_G	10	117288548	C	G	26033	ATRNL1	+	intron	LINE	1	intronic	ATRNL1	.	.	.	.	.	.	.	.	.	.	.	.	.	.	.	.	.	.	Turner_2017;SSC	11432.s1	;11432	;simplex	;11432.f1	;11432.m1	;female	;.	NA;378	NA;327
1252	14481.s1||10_117296201_C_G	genome	control	control	10_117296201_C_G	10	117296201	C	G	26033	ATRNL1	+	intron	LINE	1	intronic	ATRNL1	.	.	.	.	.	.	.	.	.	.	.	.	.	.	.	.	.	.	SSC	14481.s1	14481	simplex	14481.f1	14481.m1	male	.	395	385
1253	14215.s1||10_117304081_G_T	genome	control	control	10_117304081_G_T	10	117304081	G	T	26033	ATRNL1	+	intron	LTR	1	intronic	ATRNL1	.	.	.	.	.	.	.	.	.	.	.	.	.	.	.	.	.	.	Turner_2017;SSC	14215.s1	;14215	;simplex	;14215.f1	;14215.m1	;female	;.	NA;281	NA;287
1254	13300.p1||10_117307304_C_T	genome	NDD	autism	10_117307304_C_T	10	117307304	C	T	26033	ATRNL1	+	intron			intronic	ATRNL1	.	.	.	.	.	.	.	.	.	.	.	.	.	.	.	.	.	.	Turner_2017;SSC	13300.p1	;13300	;simplex	;13300.f1	;13300.m1	;male	;77	NA;447	NA;443
1255	11347.p1||10_117307785_G_C	genome	NDD	autism	10_117307785_G_C	10	117307785	G	C	26033	ATRNL1	+	intron	SINE	1	intronic	ATRNL1	.	.	.	.	.	.	.	.	.	.	.	.	.	.	.	.	.	.	SSC	11347.p1	11347	simplex	11347.f1	11347.m1	male	75	432	394
1256	3-0140-000||10_117309324_G_T	genome	NDD	autism	10_117309324_G_T	10	117309324	G	T	26033	ATRNL1	+	intron	Low_complexity	1	intronic	ATRNL1	.	.	.	.	.	.	.	.	.	.	.	.	.	.	.	.	.	.	Yuen2017	3-0140-000	FAM_3-0140-101	SPX	3-0140-101	3-0140-100	M		NA	NA
1257	14016.s1||10_117314386_T_A	genome	control	control	10_117314386_T_A	10	117314386	T	A	26033	ATRNL1	+	intron			intronic	ATRNL1	.	.	.	.	.	.	.	.	.	.	.	.	.	.	.	.	.	.	SSC	14016.s1	14016	simplex	14016.f1	14016.m1	female	.	255	240
1258	2-0208-003||10_117322102_T_C	genome	NDD	autism	10_117322102_T_C	10	117322102	T	C	26033	ATRNL1	+	intron	LTR	1	intronic	ATRNL1	.	.	.	.	.	.	.	.	.	.	.	.	.	.	.	.	.	.	Yuen2017	2-0208-003	FAM_2-0208-004	MPX	2-0208-002	2-0208-001	F		NA	NA
1259	AU058105||10_117326641_A_G	genome	NDD	autism	10_117326641_A_G	10	117326641	A	G	26033	ATRNL1	+	intron			intronic	ATRNL1	.	.	.	.	.	.	.	.	.	.	.	.	.	.	.	.	.	.	Yuen2017	AU058105	FAM_AU058105	MPX	AU058102	AU058101	M		NA	NA
1260	12320.s1||10_117331385_C_T	genome	control	control	10_117331385_C_T	10	117331385	C	T	26033	ATRNL1	+	intron			intronic	ATRNL1	.	.	.	.	.	.	.	.	.	.	.	.	.	.	.	.	.	.	Turner_2017;SSC	12320.s1	;12320	;simplex	;12320.f1	;12320.m1	;female	;.	NA;366	NA;306
1261	1-0381-003||10_117332352_G_A	genome	NDD	autism	10_117332352_G_A	10	117332352	G	A	26033	ATRNL1	+	intron	LTR	1	intronic	ATRNL1	.	.	.	.	.	.	.	.	.	.	.	.	.	.	.	.	.	.	Yuen2017	1-0381-003	FAM_1-0381-003	SPX	1-0381-002	1-0381-001	M		NA	NA
1262	12053.p1||10_117335740_C_T	genome	NDD	autism	10_117335740_C_T	10	117335740	C	T	26033	ATRNL1	+	intron	LINE	1	intronic	ATRNL1	.	.	.	.	.	.	.	.	.	.	.	.	.	.	.	.	.	.	SSC	12053.p1	12053	simplex	12053.f1	12053.m1	male	90	402	359
1263	AU045514||10_117338784_T_C	genome	NDD	autism	10_117338784_T_C	10	117338784	T	C	26033	ATRNL1	+	intron	LINE	1	intronic	ATRNL1	.	.	.	.	.	.	.	.	.	.	.	.	.	.	.	.	.	.	Yuen2017	AU045514	FAM_AU045514	MPX	AU045507	AU045508	M		NA	NA
1264	1-0661-003||10_117341771_G_A	genome	NDD	autism	10_117341771_G_A	10	117341771	G	A	26033	ATRNL1	+	intron	LINE	1	intronic	ATRNL1	.	.	.	.	.	.	.	.	.	.	.	.	.	.	.	.	.	.	Yuen2017	1-0661-003	FAM_1-0661-003	SPX	1-0661-002	1-0661-001	M		NA	NA
1265	11615.s1||10_117342069_C_G	genome	control	control	10_117342069_C_G	10	117342069	C	G	26033	ATRNL1	+	intron	LINE	1	intronic	ATRNL1	.	.	.	.	.	.	.	.	.	.	.	.	.	.	.	.	.	.	Turner_2017	11615.s1							NA	NA
1266	11644.p1||10_117342081_C_T	genome	NDD	autism	10_117342081_C_T	10	117342081	C	T	26033	ATRNL1	+	intron	LINE	1	intronic	ATRNL1	.	.	.	.	.	.	.	.	.	.	.	.	.	.	.	.	.	.	Turner_2017	11644.p1							NA	NA
1267	12871.p1||10_117344088_C_G	genome	NDD	autism	10_117344088_C_G	10	117344088	C	G	26033	ATRNL1	+	intron	LINE	1	intronic	ATRNL1	.	.	.	.	.	.	.	.	.	.	.	.	.	.	.	.	.	.	Turner_2017	12871.p1							NA	NA
1268	11198.p1||10_117345883_C_T	genome	NDD	autism	10_117345883_C_T	10	117345883	C	T	26033	ATRNL1	+	intron	LINE	1	intronic	ATRNL1	.	.	.	.	.	.	.	.	.	.	.	.	.	.	.	.	.	.	Turner_2017	11198.p1							NA	NA
1269	12739.p1||10_117346222_T_G	genome	NDD	autism	10_117346222_T_G	10	117346222	T	G	26033	ATRNL1	+	intron	LINE	1	intronic	ATRNL1	.	.	.	.	.	.	.	.	.	.	.	.	.	.	.	.	.	.	Turner_2017	12739.p1							NA	NA
1270	13946.s1||10_117346222_T_G	genome	control	control	10_117346222_T_G	10	117346222	T	G	26033	ATRNL1	+	intron	LINE	1	intronic	ATRNL1	.	.	.	.	.	.	.	.	.	.	.	.	.	.	.	.	.	.	Turner_2017	13946.s1							NA	NA
1271	14160.p1||10_117349017_A_G	genome	NDD	autism	10_117349017_A_G	10	117349017	A	G	26033	ATRNL1	+	intron			intronic	ATRNL1	.	.	.	.	.	.	.	.	.	.	.	.	.	.	.	.	.	.	Turner_2017;SSC	14160.p1	;14160	;simplex	;14160.f1	;14160.m1	;male	;123	NA;398	NA;366
1272	1-0197-003||10_117353902_T_G	genome	NDD	autism	10_117353902_T_G	10	117353902	T	G	26033	ATRNL1	+	intron			intronic	ATRNL1	.	.	.	.	.	.	.	.	.	.	.	.	.	.	.	.	.	.	Yuen2017	1-0197-003	FAM_1-0197-004	MPX	1-0197-002	1-0197-001	M		NA	NA
1273	14018.s1||10_117357492_G_A	genome	control	control	10_117357492_G_A	10	117357492	G	A	26033	ATRNL1	+	intron	DNA	1	intronic	ATRNL1	.	.	.	.	.	.	.	.	.	.	.	.	.	.	.	.	.	.	SSC	14018.s1	14018	simplex	14018.f1	14018.m1	male	.	356	361
1274	11726.s1||10_117378142_T_C	genome	control	control	10_117378142_T_C	10	117378142	T	C	26033	ATRNL1	+	intron	LINE	1	intronic	ATRNL1	.	.	.	.	.	.	.	.	.	.	.	.	.	.	.	.	.	.	Turner_2017;SSC	11726.s1	;11726	;simplex	;11726.f1	;11726.m1	;male	;.	NA;395	NA;396
1275	11894.p1||10_117408468_G_A	genome	NDD	autism	10_117408468_G_A	10	117408468	G	A	26033	ATRNL1	+	intron	SINE	1	intronic	ATRNL1	.	.	.	.	.	.	.	.	.	.	.	.	.	.	.	.	.	.	Turner_2017;SSC	11894.p1	;11894	;simplex	;11894.f1	;11894.m1	;male	;104	NA;504	NA;368
1276	11298.p1||10_117412409_T_C	genome	NDD	autism	10_117412409_T_C	10	117412409	T	C	26033	ATRNL1	+	intron			intronic	ATRNL1	.	.	.	.	.	.	.	.	.	.	.	.	.	.	.	.	.	.	SSC	11298.p1	11298	simplex	11298.f1	11298.m1	male	132	361	380
1277	13298.p1||10_117455730_C_T	genome	NDD	autism	10_117455730_C_T	10	117455730	C	T	26033	ATRNL1	+	intron	LINE	1	intronic	ATRNL1	.	.	.	.	.	.	.	.	.	.	.	.	.	.	.	.	.	.	Turner_2017;SSC	13298.p1	;13298	;simplex	;13298.f1	;13298.m1	;male	;84	NA;507	NA;472
1278	11775.s1||10_117472222_A_G	genome	control	control	10_117472222_A_G	10	117472222	A	G	26033	ATRNL1	+	intron	SINE	1	intronic	ATRNL1	.	.	.	.	.	.	.	.	.	.	.	.	.	.	.	.	.	.	Turner_2017;SSC	11775.s1	;11775	;simplex	;11775.f1	;11775.m1	;female	;.	NA;390	NA;313
1279	13835.s1||10_117481081_C_G	genome	control	control	10_117481081_C_G	10	117481081	C	G	26033	ATRNL1	+	intron	LTR	1	intronic	ATRNL1	.	.	.	.	.	.	.	.	.	.	.	.	.	.	.	.	.	.	Turner_2017;SSC	13835.s1	;13835	;simplex	;13835.f1	;13835.m1	;female	;.	NA;345	NA;332
1280	14301.s1||10_117507578_G_A	genome	control	control	10_117507578_G_A	10	117507578	G	A	26033	ATRNL1	+	intron			intronic	ATRNL1	.	.	.	.	.	.	.	.	.	.	.	.	.	.	.	.	.	.	SSC	14301.s1	14301	simplex	14301.f1	14301.m1	female	.	373	337
1281	gonl-98c||10_117507582_G_A	genome	control	control	10_117507582_G_A	10	117507582	G	A	26033	ATRNL1	+	intron			intronic	ATRNL1	.	.	.	.	.	.	.	.	.	.	.	.	.	.	.	.	.	.	GONL	gonl-98c							NA	NA
1282	2-1005-003||10_117522057_C_A	genome	NDD	autism	10_117522057_C_A	10	117522057	C	A	26033	ATRNL1	+	intron			intronic	ATRNL1	.	.	.	.	.	.	.	.	.	.	.	.	.	.	.	.	.	.	Yuen2017	2-1005-003	FAM_2-1005-003	SPX	2-1005-002	2-1005-001	M		NA	NA
1283	14472.s2||10_117544741_C_T	genome	control	control	10_117544741_C_T	10	117544741	C	T	26033	ATRNL1	+	intron	LTR	1	intronic	ATRNL1	.	.	.	.	.	.	.	.	.	.	.	.	.	.	.	.	.	.	SSC	14472.s2	14472	simplex	14472.f1	14472.m1	male	.	304	242
1284	12426.p1||10_117546702_T_C	genome	NDD	autism	10_117546702_T_C	10	117546702	T	C	26033	ATRNL1	+	intron			intronic	ATRNL1	.	.	.	.	.	.	.	.	.	.	.	.	.	.	.	.	.	.	SSC	12426.p1	12426	simplex	12426.f1	12426.m1	male	86	405	401
1285	14539.p1||10_117549791_A_G	genome	NDD	autism	10_117549791_A_G	10	117549791	A	G	26033	ATRNL1	+	intron	LINE	1	intronic	ATRNL1	.	.	.	.	.	.	.	.	.	.	.	.	.	.	.	.	.	.	SSC	14539.p1	14539	simplex	14539.f1	14539.m1	male	124	424	386
1286	AU3809302||10_117556288_G_A	genome	NDD	autism	10_117556288_G_A	10	117556288	G	A	26033	ATRNL1	+	intron			intronic	ATRNL1	.	.	.	.	.	.	.	.	.	.	.	.	.	.	.	.	.	.	Yuen2017	AU3809302	FAM_AU3809302	SPX	AU3809201	AU3809202	F		NA	NA
1287	13018.s1||10_117556293_T_C	genome	control	control	10_117556293_T_C	10	117556293	T	C	26033	ATRNL1	+	intron			intronic	ATRNL1	.	.	.	.	.	.	.	.	.	.	.	.	.	.	.	.	.	.	SSC	13018.s1	13018	simplex	13018.f1	13018.m1	male	.	472	367
1288	13253.p1||10_117563649_T_C	genome	NDD	autism	10_117563649_T_C	10	117563649	T	C	26033	ATRNL1	+	intron	SINE	1	intronic	ATRNL1	.	.	.	.	.	.	.	.	.	.	.	.	.	.	.	.	.	.	SSC	13253.p1	13253	simplex	13253.f1	13253.m1	male	117	445	436
1289	14149.p1||10_117585995_A_T	genome	NDD	autism	10_117585995_A_T	10	117585995	A	T	26033	ATRNL1	+	intron			intronic	ATRNL1	.	.	.	.	.	.	.	.	.	.	.	.	.	.	.	.	.	.	SSC	14149.p1	14149	simplex	14149.f1	14149.m1	male	94	373	327
1290	2-0003-003||10_117586800_A_G	genome	NDD	autism	10_117586800_A_G	10	117586800	A	G	26033	ATRNL1	+	intron			intronic	ATRNL1	.	.	.	.	.	.	.	.	.	.	.	.	.	.	.	.	.	.	Yuen2017	2-0003-003	FAM_2-0003-004	MPX	2-0003-002	2-0003-001	M		NA	NA
1291	gonl-6c||10_117593529_T_A	genome	control	control	10_117593529_T_A	10	117593529	T	A	26033	ATRNL1	+	intron			intronic	ATRNL1	.	.	.	.	.	.	.	.	.	.	.	.	.	.	.	.	.	.	GONL	gonl-6c							NA	NA
1292	14479.p1||10_117623645_C_G	genome	NDD	autism	10_117623645_C_G	10	117623645	C	G	26033	ATRNL1	+	intron	SINE	1	intronic	ATRNL1	.	.	.	.	.	.	.	.	.	.	.	.	.	.	.	.	.	.	Turner_2017	14479.p1							NA	NA
1293	AU3728301||10_117636241_A_G	genome	NDD	autism	10_117636241_A_G	10	117636241	A	G	26033	ATRNL1	+	intron			intronic	ATRNL1	.	.	.	.	.	.	.	.	.	.	.	.	.	.	.	.	.	.	Yuen2017	AU3728301	FAM_AU3728301	SPX	AU3728201	AU3728202	F		NA	NA
1294	14550.p1||10_117642004_C_T	genome	NDD	autism	10_117642004_C_T	10	117642004	C	T	26033	ATRNL1	+	intron	LINE	1	intronic	ATRNL1	.	.	.	.	.	.	.	.	.	.	.	.	.	.	.	.	.	.	SSC	14550.p1	14550	simplex	14550.f1	14550.m1	female	40	371	300
1295	11348.p1||10_117644417_C_A	genome	NDD	autism	10_117644417_C_A	10	117644417	C	A	26033	ATRNL1	+	intron			intronic	ATRNL1	.	.	.	.	.	.	.	.	.	.	.	.	.	.	.	.	.	.	Turner_2017;SSC	11348.p1	;11348	;simplex	;11348.f1	;11348.m1	;male	;84	NA;350	NA;349
1296	13903.p1||10_117654519_C_T	genome	NDD	autism	10_117654519_C_T	10	117654519	C	T	26033	ATRNL1	+	intron			intronic	ATRNL1	.	.	.	.	.	.	.	.	.	.	.	.	.	.	.	.	.	.	SSC	13903.p1	13903	simplex	13903.f1	13903.m1	male	79	300	262
1297	13284.p1||10_117656533_T_C	genome	NDD	autism	10_117656533_T_C	10	117656533	T	C	26033	ATRNL1	+	intron			intronic	ATRNL1	.	.	.	.	.	.	.	.	.	.	.	.	.	.	.	.	.	.	SSC	13284.p1	13284	simplex	13284.f1	13284.m1	male	98	309	311
1298	12297.s1||10_117668698_T_C	genome	control	control	10_117668698_T_C	10	117668698	T	C	26033	ATRNL1	+	intron			intronic	ATRNL1	.	.	.	.	.	.	.	.	.	.	.	.	.	.	.	.	.	.	SSC	12297.s1	12297	simplex	12297.f1	12297.m1	male	.	470	427
1299	13620.s1||10_117676717_C_T	genome	control	control	10_117676717_C_T	10	117676717	C	T	26033	ATRNL1	+	intron	SINE	1	intronic	ATRNL1	.	.	.	.	.	.	.	.	.	.	.	.	.	.	.	.	.	.	SSC	13620.s1	13620	simplex	13620.f1	13620.m1	female	.	494	444
1300	11366.s1||10_117677071_C_T	genome	control	control	10_117677071_C_T	10	117677071	C	T	26033	ATRNL1	+	intron	SINE	1	intronic	ATRNL1	.	.	.	.	.	.	.	.	.	.	.	.	.	.	.	.	.	.	SSC	11366.s1	11366	simplex	11366.f1	11366.m1	male	.	367	285
1301	AU1894303||10_117696551_C_T	genome	NDD	autism	10_117696551_C_T	10	117696551	C	T	26033	ATRNL1	+	intron			intronic	ATRNL1	.	.	.	.	.	.	.	.	.	.	.	.	.	.	.	.	.	.	Yuen2017	AU1894303	FAM_AU1894304	MPX	AU1894201	AU1894203	M		NA	NA
1302	13666.s1||10_117699689_C_T	genome	control	control	10_117699689_C_T	10	117699689	C	T	26033	ATRNL1	+	intron	LTR	1	intronic	ATRNL1	.	.	.	.	.	.	.	.	.	.	.	.	.	.	.	.	.	.	SSC	13666.s1	13666	simplex	13666.f1	13666.m1	male	.	302	295
1303	13515.p1||10_117708469_T_A	genome	NDD	autism	10_117708469_T_A	10	117708469	T	A	26033	ATRNL1	+	3'UTR			UTR3	ATRNL1	NM_207303:c.*4179T>A	.	.	.	.	.	.	.	.	.	.	.	.	.	.	.	.	.	Turner2016	13515.p1							NA	NA
1304	13556.p1||10_117828832_G_T	genome	NDD	autism	10_117828832_G_T	10	117828832	G	T	2674	GFRA1	-	intron			intronic	GFRA1	.	.	.	.	.	.	.	.	.	.	.	.	.	.	.	.	.	.	SSC	13556.p1	13556	simplex	13556.f1	13556.m1	male	102	471	358
1305	AU3586303||10_117836367_T_C	genome	NDD	autism	10_117836367_T_C	10	117836367	T	C	2674	GFRA1	-	intron			intronic	GFRA1	.	.	.	.	.	.	.	.	.	.	.	.	.	.	.	.	.	.	Yuen2017	AU3586303	FAM_AU3586303	SPX	AU3586201	AU3586202	M		NA	NA
1306	AU4089302||10_117838350_G_A	genome	NDD	autism	10_117838350_G_A	10	117838350	G	A	2674	GFRA1	-	intron			intronic	GFRA1	.	.	.	.	.	.	.	.	.	.	.	.	.	.	.	.	.	.	Yuen2017	AU4089302	FAM_AU4089302	MPX	AU4089201	AU4089202	M		NA	NA
1307	14201.s1||10_117844874_C_T	genome	control	control	10_117844874_C_T	10	117844874	C	T	2674	GFRA1	-	intron			intronic	GFRA1	.	.	.	.	.	.	.	.	.	.	.	.	.	.	.	.	.	.	SSC	14201.s1	14201	simplex	14201.f1	14201.m1	female	.	402	365
1308	13968.s1||10_117857947_C_T	genome	control	control	10_117857947_C_T	10	117857947	C	T	2674	GFRA1	-	intron			intronic	GFRA1	.	.	.	.	.	.	.	.	.	.	.	.	.	.	.	.	.	.	SSC	13968.s1	13968	simplex	13968.f1	13968.m1	male	.	360	338
1309	11010.p1||10_117873924_G_A	genome	NDD	autism	10_117873924_G_A	10	117873924	G	A	2674	GFRA1	-	intron			intronic	GFRA1	.	.	.	.	.	.	.	.	.	.	.	.	.	.	.	.	.	.	Turner_2017;SSC	11010.p1	;11010	;simplex	;11010.f1	;11010.m1	;male	;68	NA;413	NA;413
1310	11665.p1||10_11787623_C_T	genome	NDD	autism	10_11787623_C_T	10	11787623	C	T	79746	ECHDC3	+	intron			intronic	ECHDC3	.	.	.	.	.	.	.	.	.	.	.	.	.	.	.	.	.	.	Turner_2017;SSC	11665.p1	;11665	;simplex	;11665.f1	;11665.m1	;male	;79	NA;346	NA;347
1311	2-1279-003||10_117885456_C_A	genome	NDD	autism	10_117885456_C_A	10	117885456	C	A	2674	GFRA1	-	intron			intronic	GFRA1	.	.	.	.	.	.	.	.	.	.	.	.	.	.	.	.	.	.	Yuen2016	2-1279-003	FAM_2-1279-003	SPX	2-1279-002	2-1279-001	F		NA	NA
1312	14042.p1||10_117887443_C_A	genome	NDD	autism	10_117887443_C_A	10	117887443	C	A	2674	GFRA1	-	intron			intronic	GFRA1	.	.	.	.	.	.	.	.	.	.	.	.	.	.	.	.	.	.	SSC	14042.p1	14042	simplex	14042.f1	14042.m1	female	77	493	458
1313	14404.p1||10_11789383_C_T	genome	NDD	autism	10_11789383_C_T	10	11789383	C	T	79746	ECHDC3	+	CDS||5'UTR			exonic	ECHDC3	.	nonsynonymous SNV	ECHDC3:NM_024693:exon2:c.C206T:p.A69V	T	D	P	D	D	M	T	D	D	D	D	D	25	0.935	0.734	Turner_2017;SSC	14404.p1	;14404	;simplex	;14404.f1	;14404.m1	;male	;20	NA;463	NA;433
1314	11520.s1||10_117904748_A_C	genome	control	control	10_117904748_A_C	10	117904748	A	C	2674	GFRA1	-	intron	LINE	1	intronic	GFRA1	.	.	.	.	.	.	.	.	.	.	.	.	.	.	.	.	.	.	Turner_2017;SSC	11520.s1	;11520	;simplex	;11520.f1	;11520.m1	;male	;.	NA;373	NA;382
1315	11124.p1||10_117906309_G_C	genome	NDD	autism	10_117906309_G_C	10	117906309	G	C	2674	GFRA1	-	intron	DNA	1	intronic	GFRA1	.	.	.	.	.	.	.	.	.	.	.	.	.	.	.	.	.	.	SSC	11124.p1	11124	simplex	11124.f1	11124.m1	male	72	359	351
1316	11653.p1||10_117920697_A_T	genome	NDD	autism	10_117920697_A_T	10	117920697	A	T	2674	GFRA1	-	intron			intronic	GFRA1	.	.	.	.	.	.	.	.	.	.	.	.	.	.	.	.	.	.	SSC	11653.p1	11653	simplex	11653.f1	11653.m1	male	44	389	323
1317	11653.p1||10_117920698_A_G	genome	NDD	autism	10_117920698_A_G	10	117920698	A	G	2674	GFRA1	-	intron			intronic	GFRA1	.	.	.	.	.	.	.	.	.	.	.	.	.	.	.	.	.	.	SSC	11653.p1	11653	simplex	11653.f1	11653.m1	male	44	389	323
1318	11653.p1||10_117921384_G_C	genome	NDD	autism	10_117921384_G_C	10	117921384	G	C	2674	GFRA1	-	intron			intronic	GFRA1	.	.	.	.	.	.	.	.	.	.	.	.	.	.	.	.	.	.	Turner_2017;SSC	11653.p1	;11653	;simplex	;11653.f1	;11653.m1	;male	;44	NA;389	NA;323
1319	1-0494-003|1-0494-003A||10_117924552_T_C	genome	NDD	autism	10_117924552_T_C	10	117924552	T	C	2674	GFRA1	-	intron			intronic	GFRA1	.	.	.	.	.	.	.	.	.	.	.	.	.	.	.	.	.	.	Yuen2017	1-0494-003|1-0494-003A	FAM_1-0494-004;	SPX;	1-0494-002;	1-0494-001;	M;		NA	NA
1320	11620.s1||10_117926600_C_T	genome	control	control	10_117926600_C_T	10	117926600	C	T	2674	GFRA1	-	intron	SINE	1	intronic	GFRA1	.	.	.	.	.	.	.	.	.	.	.	.	.	.	.	.	.	.	Turner_2017;SSC	11620.s1	;11620	;simplex	;11620.f1	;11620.m1	;female	;.	NA;474	NA;430
1321	14136.s1||10_117927179_G_C	genome	control	control	10_117927179_G_C	10	117927179	G	C	2674	GFRA1	-	intron	DNA	1	intronic	GFRA1	.	.	.	.	.	.	.	.	.	.	.	.	.	.	.	.	.	.	SSC	14136.s1	14136	simplex	14136.f1	14136.m1	female	.	341	334
1322	12086.s1||10_117929620_A_T	genome	control	control	10_117929620_A_T	10	117929620	A	T	2674	GFRA1	-	intron	LTR	1	intronic	GFRA1	.	.	.	.	.	.	.	.	.	.	.	.	.	.	.	.	.	.	Turner_2017;SSC	12086.s1	;12086	;simplex	;12086.f1	;12086.m1	;male	;.	NA;324	NA;293
1323	gonl-152c||10_117939361_G_A	genome	control	control	10_117939361_G_A	10	117939361	G	A	2674	GFRA1	-	intron			intronic	GFRA1	.	.	.	.	.	.	.	.	.	.	.	.	.	.	.	.	.	.	GONL	gonl-152c							NA	NA
1324	14125.p1||10_117940564_C_T	genome	NDD	autism	10_117940564_C_T	10	117940564	C	T	2674	GFRA1	-	intron			intronic	GFRA1	.	.	.	.	.	.	.	.	.	.	.	.	.	.	.	.	.	.	SSC	14125.p1	14125	simplex	14125.f1	14125.m1	male	94	380	377
1325	13102.p1||10_117946452_C_G	genome	NDD	autism	10_117946452_C_G	10	117946452	C	G	2674	GFRA1	-	intron			intronic	GFRA1	.	.	.	.	.	.	.	.	.	.	.	.	.	.	.	.	.	.	Turner_2017;SSC	13102.p1	;13102	;simplex	;13102.f1	;13102.m1	;female	;92	NA;399	NA;353
1326	14486.s1||10_117951807_G_A	genome	control	control	10_117951807_G_A	10	117951807	G	A	2674	GFRA1	-	intron			intronic	GFRA1	.	.	.	.	.	.	.	.	.	.	.	.	.	.	.	.	.	.	SSC	14486.s1	14486	simplex	14486.f1	14486.m1	male	.	381	347
1327	14629.p1||10_117960603_G_C	genome	NDD	autism	10_117960603_G_C	10	117960603	G	C	2674	GFRA1	-	intron			intronic	GFRA1	.	.	.	.	.	.	.	.	.	.	.	.	.	.	.	.	.	.	SSC	14629.p1	14629	simplex	14629.f1	14629.m1	male	26	469	392
1328	12010.p1||10_11796650_G_T	genome	NDD	autism	10_11796650_G_T	10	11796650	G	T	79746	ECHDC3	+	intron			intronic	ECHDC3	.	.	.	.	.	.	.	.	.	.	.	.	.	.	.	.	.	.	SSC	12010.p1	12010	simplex	12010.f1	12010.m1	female	103	390	377
1329	AU050704||10_117977387_T_C	genome	NDD	autism	10_117977387_T_C	10	117977387	T	C	2674	GFRA1	-	intron	SINE	1	intronic	GFRA1	.	.	.	.	.	.	.	.	.	.	.	.	.	.	.	.	.	.	Yuen2017	AU050704	FAM_AU050704	MPX	AU050702	AU050701	M		NA	NA
1330	AU2458303||10_117977987_T_G	genome	NDD	autism	10_117977987_T_G	10	117977987	T	G	2674	GFRA1	-	intron	DNA	1	intronic	GFRA1	.	.	.	.	.	.	.	.	.	.	.	.	.	.	.	.	.	.	Yuen2017	AU2458303	FAM_AU2458303	MPX	AU2458201	AU2458202	M		NA	NA
1331	11931.p1||10_117979728_T_C	genome	NDD	autism	10_117979728_T_C	10	117979728	T	C	2674	GFRA1	-	intron			intronic	GFRA1	.	.	.	.	.	.	.	.	.	.	.	.	.	.	.	.	.	.	SSC	11931.p1	11931	simplex	11931.f1	11931.m1	male	69	472	370
1332	13423.p1||10_117987691_G_A	genome	NDD	autism	10_117987691_G_A	10	117987691	G	A	2674	GFRA1	-	intron			intronic	GFRA1	.	.	.	.	.	.	.	.	.	.	.	.	.	.	.	.	.	.	SSC	13423.p1	13423	simplex	13423.f1	13423.m1	male	96	440	409
1333	13971.p1||10_117991101_C_T	genome	NDD	autism	10_117991101_C_T	10	117991101	C	T	2674	GFRA1	-	intron			intronic	GFRA1	.	.	.	.	.	.	.	.	.	.	.	.	.	.	.	.	.	.	SSC	13971.p1	13971	simplex	13971.f1	13971.m1	male	107	375	377
1334	12281.p1||10_117998423_G_T	genome	NDD	autism	10_117998423_G_T	10	117998423	G	T	2674	GFRA1	-	intron			intronic	GFRA1	.	.	.	.	.	.	.	.	.	.	.	.	.	.	.	.	.	.	SSC	12281.p1	12281	simplex	12281.f1	12281.m1	male	99	436	428
1335	14694.p1||10_118087280_G_A	genome	NDD	autism	10_118087280_G_A	10	118087280	G	A	374355	CCDC172	+	intron			intronic	CCDC172	.	.	.	.	.	.	.	.	.	.	.	.	.	.	.	.	.	.	SSC	14694.p1	14694	simplex	14694.f1	14694.m1	female	73	432	444
1336	13555.s1||10_118100042_A_G	genome	control	control	10_118100042_A_G	10	118100042	A	G	374355	CCDC172	+	intron	LINE	1	intronic	CCDC172	.	.	.	.	.	.	.	.	.	.	.	.	.	.	.	.	.	.	SSC	13555.s1	13555	simplex	13555.f1	13555.m1	female	.	461	410
1337	AU3646301||10_118118778_A_G	genome	NDD	autism	10_118118778_A_G	10	118118778	A	G	374355	CCDC172	+	intron			intronic	CCDC172	.	.	.	.	.	.	.	.	.	.	.	.	.	.	.	.	.	.	Yuen2017	AU3646301	FAM_AU3646301	SPX	AU3646201	AU3646202	M		NA	NA
1338	14563.p1||10_118120452_T_C	genome	NDD	autism	10_118120452_T_C	10	118120452	T	C	374355	CCDC172	+	intron	LTR	1	intronic	CCDC172	.	.	.	.	.	.	.	.	.	.	.	.	.	.	.	.	.	.	SSC	14563.p1	14563	simplex	14563.f1	14563.m1	male	97	463	453
1339	14351.p1||10_118135303_G_C	genome	NDD	autism	10_118135303_G_C	10	118135303	G	C	374355	CCDC172	+	intron	LINE	1	intronic	CCDC172	.	.	.	.	.	.	.	.	.	.	.	.	.	.	.	.	.	.	SSC	14351.p1	14351	simplex	14351.f1	14351.m1	male	28	462	325
1340	NCS3.p1||10_118137355_T_A	genome	NDD	autism	10_118137355_T_A	10	118137355	T	A	374355	CCDC172	+	intron			intronic	CCDC172	.	.	.	.	.	.	.	.	.	.	.	.	.	.	.	.	.	.	Turner2016	NCS3.p1							NA	NA
1341	14356.p1||10_118203675_C_T	genome	NDD	autism	10_118203675_C_T	10	118203675	C	T	119548	PNLIPRP3	+	intron	LTR	1	intronic	PNLIPRP3	.	.	.	.	.	.	.	.	.	.	.	.	.	.	.	.	.	.	SSC	14356.p1	14356	simplex	14356.f1	14356.m1	male	110	332	313
1342	14290.p1||10_118205885_T_A	genome	NDD	autism	10_118205885_T_A	10	118205885	T	A	119548	PNLIPRP3	+	intron			intronic	PNLIPRP3	.	.	.	.	.	.	.	.	.	.	.	.	.	.	.	.	.	.	SSC	14290.p1	14290	simplex	14290.f1	14290.m1	male	70	345	292
1343	7-0248-003||10_118211427_G_A	genome	NDD	autism	10_118211427_G_A	10	118211427	G	A	119548	PNLIPRP3	+	intron	LTR	1	intronic	PNLIPRP3	.	.	.	.	.	.	.	.	.	.	.	.	.	.	.	.	.	.	Yuen2017	7-0248-003	FAM_7-0248-003	SPX	7-0248-002	7-0248-001	M		NA	NA
1344	11350.p1||10_118212347_C_A	genome	NDD	autism	10_118212347_C_A	10	118212347	C	A	119548	PNLIPRP3	+	intron	LTR	1	intronic	PNLIPRP3	.	.	.	.	.	.	.	.	.	.	.	.	.	.	.	.	.	.	SSC	11350.p1	11350	simplex	11350.f1	11350.m1	male	92	403	408
1345	11800.s1||10_118213546_G_C	genome	control	control	10_118213546_G_C	10	118213546	G	C	119548	PNLIPRP3	+	intron	LINE	1	intronic	PNLIPRP3	.	.	.	.	.	.	.	.	.	.	.	.	.	.	.	.	.	.	SSC	11800.s1	11800	simplex	11800.f1	11800.m1	male	.	419	380
1346	2-1276-003||10_118218232_A_C	genome	NDD	autism	10_118218232_A_C	10	118218232	A	C	119548	PNLIPRP3	+	intron			intronic	PNLIPRP3	.	.	.	.	.	.	.	.	.	.	.	.	.	.	.	.	.	.	Yuen2016	2-1276-003	FAM_2-1276-003	SPX	2-1276-002	2-1276-001	F		NA	NA
1347	12303.p1||10_118230521_A_G	genome	NDD	autism	10_118230521_A_G	10	118230521	A	G	119548	PNLIPRP3	+	intron			intronic	PNLIPRP3	.	.	.	.	.	.	.	.	.	.	.	.	.	.	.	.	.	.	Turner_2017;SSC	12303.p1	;12303	;simplex	;12303.f1	;12303.m1	;male	;74	NA;350	NA;285
1348	14157.s1||10_118308305_G_T	genome	control	control	10_118308305_G_T	10	118308305	G	T	5406	PNLIP	+	intron	DNA	1	intronic	PNLIP	.	.	.	.	.	.	.	.	.	.	.	.	.	.	.	.	.	.	SSC	14157.s1	14157	simplex	14157.f1	14157.m1	female	.	506	475
1349	12100.s1||10_118309397_C_A	genome	control	control	10_118309397_C_A	10	118309397	C	A	5406	PNLIP	+	intron			intronic	PNLIP	.	.	.	.	.	.	.	.	.	.	.	.	.	.	.	.	.	.	SSC	12100.s1	12100	simplex	12100.f1	12100.m1	female	.	348	299
1350	12051.p1|12905.p1||10_118315808_A_G	genome	NDD	autism	10_118315808_A_G	10	118315808	A	G	5406	PNLIP	+	intron			intronic	PNLIP	.	.	.	.	.	.	.	.	.	.	.	.	.	.	.	.	.	.	SSC	12051.p1|12905.p1	12051;12905	simplex	12051.f1;12905.f1	12051.m1;12905.m1	male	66;68	416	380
1351	13940.s1||10_118324991_G_T	genome	control	control	10_118324991_G_T	10	118324991	G	T	5406	PNLIP	+	intron	SINE	1	intronic	PNLIP	.	.	.	.	.	.	.	.	.	.	.	.	.	.	.	.	.	.	Turner_2017	13940.s1							NA	NA
1352	12843.s1||10_118353571_A_G	genome	control	control	10_118353571_A_G	10	118353571	A	G	5407	PNLIPRP1	+	intron			intronic	PNLIPRP1	.	.	.	.	.	.	.	.	.	.	.	.	.	.	.	.	.	.	SSC	12843.s1	12843	simplex	12843.f1	12843.m1	female	.	408	367
1353	14328.s1||10_118357257_A_G	genome	control	control	10_118357257_A_G	10	118357257	A	G	5407	PNLIPRP1	+	intron	DNA	1	intronic	PNLIPRP1	.	.	.	.	.	.	.	.	.	.	.	.	.	.	.	.	.	.	Turner_2017;SSC	14328.s1	;14328	;simplex	;14328.f1	;14328.m1	;male	;.	NA;424	NA;405
1354	14420.s1||10_118360157_C_T	genome	control	control	10_118360157_C_T	10	118360157	C	T	5407	PNLIPRP1	+	intron	DNA	1	intronic	PNLIPRP1	.	.	.	.	.	.	.	.	.	.	.	.	.	.	.	.	.	.	SSC	14420.s1	14420	simplex	14420.f1	14420.m1	female	.	362	296
1355	11433.p1||10_118360532_G_A	genome	NDD	autism	10_118360532_G_A	10	118360532	G	A	5407	PNLIPRP1	+	intron			intronic	PNLIPRP1	.	.	.	.	.	.	.	.	.	.	.	.	.	.	.	.	.	.	SSC	11433.p1	11433	simplex	11433.f1	11433.m1	male	84	437	401
1356	12086.p1||10_118365624_C_T	genome	NDD	autism	10_118365624_C_T	10	118365624	C	T	5407	PNLIPRP1	+	intron			intronic	PNLIPRP1	.	.	.	.	.	.	.	.	.	.	.	.	.	.	.	.	.	.	Turner_2017;SSC	12086.p1	;12086	;simplex	;12086.f1	;12086.m1	;male	;108	NA;456	NA;425
1357	14183.p1||10_118385459_A_G	genome	NDD	autism	10_118385459_A_G	10	118385459	A	G	5408	PNLIPRP2	+	CDS			exonic	PNLIPRP2	.	unknown	UNKNOWN	.	.	.	.	.	.	.	.	.	.	.	.	.	.	.	SSC	14183.p1	14183	simplex	14183.f1	14183.m1	male	104	403	331
1358	11090.s1||10_118423412_C_A	genome	control	control	10_118423412_C_A	10	118423412	C	A	143379	C10orf82	-	3'UTR			UTR3	C10orf82	NM_001350930:c.*5G>T;NM_001350931:c.*5G>T;NM_144661:c.*269G>T;NM_001330142:c.*5G>T	.	.	.	.	.	.	.	.	.	.	.	.	.	.	.	.	.	SSC	11090.s1	11090	simplex	11090.f1	11090.m1	male	.	367	367
1359	11489.s1||10_118431417_G_A	genome	control	control	10_118431417_G_A	10	118431417	G	A	259217	HSPA12A	-	3'UTR			UTR3	HSPA12A	NM_025015:c.*2875C>T;NM_001330164:c.*2875C>T	.	.	.	.	.	.	.	.	.	.	.	.	.	.	.	.	.	SSC	11489.s1	11489	simplex	11489.f1	11489.m1	male	.	422	356
1360	12837.p1||10_118431739_T_C	genome	NDD	autism	10_118431739_T_C	10	118431739	T	C	259217	HSPA12A	-	3'UTR			UTR3	HSPA12A	NM_025015:c.*2553A>G;NM_001330164:c.*2553A>G	.	.	.	.	.	.	.	.	.	.	.	.	.	.	.	.	.	Turner_2017;SSC	12837.p1	;12837	;simplex	;12837.f1	;12837.m1	;male	;92	NA;380	NA;379
1361	13891.p1||10_118435880_G_A	genome	NDD	autism	10_118435880_G_A	10	118435880	G	A	259217	HSPA12A	-	intron			intronic	HSPA12A	.	.	.	.	.	.	.	.	.	.	.	.	.	.	.	.	.	.	Turner_2017;SSC	13891.p1	;13891	;simplex	;13891.f1	;13891.m1	;male	;31	NA;406	NA;448
1362	14249.p1||10_118436697_G_A	genome	NDD	autism	10_118436697_G_A	10	118436697	G	A	259217	HSPA12A	-	intron	SINE	1	intronic	HSPA12A	.	.	.	.	.	.	.	.	.	.	.	.	.	.	.	.	.	.	Turner_2017;SSC	14249.p1	;14249	;simplex	;14249.f1	;14249.m1	;male	;79	NA;413	NA;379
1363	13381.s1||10_118453401_T_C	genome	control	control	10_118453401_T_C	10	118453401	T	C	259217	HSPA12A	-	intron			intronic	HSPA12A	.	.	.	.	.	.	.	.	.	.	.	.	.	.	.	.	.	.	SSC	13381.s1	13381	simplex	13381.f1	13381.m1	female	.	447	446
1364	11781.s2||10_118458928_G_A	genome	control	control	10_118458928_G_A	10	118458928	G	A	259217	HSPA12A	-	intron			intronic	HSPA12A	.	.	.	.	.	.	.	.	.	.	.	.	.	.	.	.	.	.	SSC	11781.s2	11781	simplex	11781.f1	11781.m1	male	.	397	370
1365	13493.p1||10_118482419_G_A	genome	NDD	autism	10_118482419_G_A	10	118482419	G	A	259217	HSPA12A	-	intron			intronic	HSPA12A	.	.	.	.	.	.	.	.	.	.	.	.	.	.	.	.	.	.	SSC	13493.p1	13493	simplex	13493.f1	13493.m1	male	100	382	363
1366	12021.s1||10_118483588_C_A	genome	control	control	10_118483588_C_A	10	118483588	C	A	259217	HSPA12A	-	intron			intronic	HSPA12A	.	.	.	.	.	.	.	.	.	.	.	.	.	.	.	.	.	.	SSC	12021.s1	12021	simplex	12021.f1	12021.m1	male	.	378	295
1367	2-0270-004||10_118491867_C_A	genome	NDD	autism	10_118491867_C_A	10	118491867	C	A	259217	HSPA12A	-	intron			intronic	HSPA12A	.	.	.	.	.	.	.	.	.	.	.	.	.	.	.	.	.	.	Yuen2017	2-0270-004	FAM_2-0270-004	MPX	2-0270-002	2-0270-001	M		NA	NA
1368	11700.p1||10_118495379_G_A	genome	NDD	autism	10_118495379_G_A	10	118495379	G	A	259217	HSPA12A	-	intron	SINE	1	intronic	HSPA12A	.	.	.	.	.	.	.	.	.	.	.	.	.	.	.	.	.	.	Turner_2017	11700.p1							NA	NA
1369	1-0638-003||10_118511186_G_A	genome	NDD	autism	10_118511186_G_A	10	118511186	G	A	259217	HSPA12A	-	intron	LTR	1	intronic	HSPA12A	.	.	.	.	.	.	.	.	.	.	.	.	.	.	.	.	.	.	Yuen2017	1-0638-003	FAM_1-0638-003	SPX	1-0638-002	1-0638-001	F		NA	NA
1370	12860.s1||10_118512302_T_C	genome	control	control	10_118512302_T_C	10	118512302	T	C	259217	HSPA12A	-	intron	SINE	1	intronic	HSPA12A	.	.	.	.	.	.	.	.	.	.	.	.	.	.	.	.	.	.	Turner_2017;SSC	12860.s1	;12860	;simplex	;12860.f1	;12860.m1	;female	;.	NA;390	NA;361
1371	12610.s1||10_118519412_C_G	genome	control	control	10_118519412_C_G	10	118519412	C	G	259217	HSPA12A	-	intron	LTR	1	intronic	HSPA12A	.	.	.	.	.	.	.	.	.	.	.	.	.	.	.	.	.	.	SSC	12610.s1	12610	simplex	12610.f1	12610.m1	female	.	276	353
1372	14168.s1||10_118526478_C_A	genome	control	control	10_118526478_C_A	10	118526478	C	A	259217	HSPA12A	-	intron			intronic	HSPA12A	.	.	.	.	.	.	.	.	.	.	.	.	.	.	.	.	.	.	SSC	14168.s1	14168	simplex	14168.f1	14168.m1	male	.	371	371
1373	13914.s1||10_118528284_G_A	genome	control	control	10_118528284_G_A	10	118528284	G	A	259217	HSPA12A	-	intron	SINE	1	intronic	HSPA12A	.	.	.	.	.	.	.	.	.	.	.	.	.	.	.	.	.	.	SSC	13914.s1	13914	simplex	13914.f1	13914.m1	female	.	325	248
1374	12834.p1||10_118535488_G_A	genome	NDD	autism	10_118535488_G_A	10	118535488	G	A	259217	HSPA12A	-	intron			intronic	HSPA12A	.	.	.	.	.	.	.	.	.	.	.	.	.	.	.	.	.	.	Turner_2017;SSC	12834.p1	;12834	;simplex	;12834.f1	;12834.m1	;male	;104	NA;395	NA;356
1375	2-0208-004||10_118539281_C_T	genome	NDD	autism	10_118539281_C_T	10	118539281	C	T	259217	HSPA12A	-	intron			intronic	HSPA12A	.	.	.	.	.	.	.	.	.	.	.	.	.	.	.	.	.	.	Yuen2017	2-0208-004	FAM_2-0208-004	MPX	2-0208-002	2-0208-001	F		NA	NA
1376	AU3862305||10_118543699_A_C	genome	NDD	autism	10_118543699_A_C	10	118543699	A	C	259217	HSPA12A	-	intron	LTR	1	intronic	HSPA12A	.	.	.	.	.	.	.	.	.	.	.	.	.	.	.	.	.	.	Yuen2017	AU3862305	FAM_AU3862305	MPX	AU3862201	AU3862202	M		NA	NA
1377	1-0004-003||10_118566219_C_T	genome	NDD	autism	10_118566219_C_T	10	118566219	C	T	259217	HSPA12A	-	intron			intronic	HSPA12A	.	.	.	.	.	.	.	.	.	.	.	.	.	.	.	.	.	.	Yuen2017	1-0004-003	FAM_1-0004-003	SPX	1-0004-002	1-0004-001	F		NA	NA
1378	12680.p1||10_118568039_G_C	genome	NDD	autism	10_118568039_G_C	10	118568039	G	C	259217	HSPA12A	-	intron	DNA	1	intronic	HSPA12A	.	.	.	.	.	.	.	.	.	.	.	.	.	.	.	.	.	.	Turner_2017;SSC	12680.p1	;12680	;simplex	;12680.f1	;12680.m1	;male	;57	NA;511	NA;480
1379	1-0329-004||10_118575451_C_T	genome	NDD	autism	10_118575451_C_T	10	118575451	C	T	259217	HSPA12A	-	intron			intronic	HSPA12A	.	.	.	.	.	.	.	.	.	.	.	.	.	.	.	.	.	.	Yuen2017	1-0329-004	FAM_1-0329-004	MPX	1-0329-002	1-0329-001	M		NA	NA
1380	14185.p1||10_118603343_T_C	genome	NDD	autism	10_118603343_T_C	10	118603343	T	C	259217	HSPA12A	-	intron	DNA	1	intronic	HSPA12A	.	.	.	.	.	.	.	.	.	.	.	.	.	.	.	.	.	.	SSC	14185.p1	14185	simplex	14185.f1	14185.m1	male	69	417	383
1381	13952.p1||10_118606138_C_T	genome	NDD	autism	10_118606138_C_T	10	118606138	C	T	259217	HSPA12A	-	intron	SINE	1	intronic	HSPA12A	.	.	.	.	.	.	.	.	.	.	.	.	.	.	.	.	.	.	Turner_2017;SSC	13952.p1	;13952	;simplex	;13952.f1	;13952.m1	;male	;15	NA;395	NA;331
1382	12007.p1||10_118617508_C_G	genome	NDD	autism	10_118617508_C_G	10	118617508	C	G	387712	ENO4	+	intron			intronic	ENO4	.	.	.	.	.	.	.	.	.	.	.	.	.	.	.	.	.	.	SSC	12007.p1	12007	simplex	12007.f1	12007.m1	female	54	348	413
1383	14031.s1||10_118620129_T_C	genome	control	control	10_118620129_T_C	10	118620129	T	C	387712	ENO4	+	intron	LINE	1	intronic	ENO4	.	.	.	.	.	.	.	.	.	.	.	.	.	.	.	.	.	.	Turner_2017;SSC	14031.s1	;14031	;simplex	;14031.f1	;14031.m1	;male	;.	NA;323	NA;438
1384	13681.s1||10_118625427_C_T	genome	control	control	10_118625427_C_T	10	118625427	C	T	387712	ENO4	+	intron	SINE	1	intronic	ENO4	.	.	.	.	.	.	.	.	.	.	.	.	.	.	.	.	.	.	Turner_2017;SSC	13681.s1	;13681	;simplex	;13681.f1	;13681.m1	;female	;.	NA;344	NA;368
1385	12617.p1||10_118626479_A_G	genome	NDD	autism	10_118626479_A_G	10	118626479	A	G	387712	ENO4	+	intron			intronic	ENO4	.	.	.	.	.	.	.	.	.	.	.	.	.	.	.	.	.	.	SSC	12617.p1	12617	simplex	12617.f1	12617.m1	female	112	442	462
1386	2-1378-003||10_118659389_A_G	genome	NDD	autism	10_118659389_A_G	10	118659389	A	G	57698	KIAA1598	-	intron			intronic	SHTN1	.	.	.	.	.	.	.	.	.	.	.	.	.	.	.	.	.	.	Yuen2017	2-1378-003	FAM_2-1378-003	SPX	2-1378-002	2-1378-001	M		NA	NA
1387	2-1729-003||10_118665338_C_T	genome	NDD	autism	10_118665338_C_T	10	118665338	C	T	57698	KIAA1598	-	intron			intronic	SHTN1	.	.	.	.	.	.	.	.	.	.	.	.	.	.	.	.	.	.	Yuen2017	2-1729-003	FAM_2-1729-003	SPX	2-1729-002	2-1729-001	M		NA	NA
1388	2-0297-004||10_118670985_T_C	genome	NDD	autism	10_118670985_T_C	10	118670985	T	C	57698	KIAA1598	-	intron			intronic	SHTN1	.	.	.	.	.	.	.	.	.	.	.	.	.	.	.	.	.	.	Yuen2017	2-0297-004	FAM_2-0297-004	MPX	2-0297-002	2-0297-001	M		NA	NA
1389	11653.p1||10_118676352_T_C	genome	NDD	autism	10_118676352_T_C	10	118676352	T	C	57698	KIAA1598	-	intron			intronic	SHTN1	.	.	.	.	.	.	.	.	.	.	.	.	.	.	.	.	.	.	Turner_2017;SSC	11653.p1	;11653	;simplex	;11653.f1	;11653.m1	;male	;44	NA;389	NA;323
1390	AU3692302||10_11867734_G_T	genome	NDD	autism	10_11867734_G_T	10	11867734	G	T	254427	C10orf47	+	intron			intronic	PROSER2	.	.	.	.	.	.	.	.	.	.	.	.	.	.	.	.	.	.	Yuen2017	AU3692302	FAM_AU3692302	MPX	AU3692201	AU3692202	F		NA	NA
1391	2-1212-003||10_118694183_G_T	genome	NDD	autism	10_118694183_G_T	10	118694183	G	T	57698	KIAA1598	-	intron	LINE	1	intronic	SHTN1	.	.	.	.	.	.	.	.	.	.	.	.	.	.	.	.	.	.	Yuen2017	2-1212-003	FAM_2-1212-003	SPX	2-1212-002	2-1212-001	M		NA	NA
1392	1-0751-003||10_118696574_G_A	genome	NDD	autism	10_118696574_G_A	10	118696574	G	A	57698	KIAA1598	-	intron	LINE	1	intronic	SHTN1	.	.	.	.	.	.	.	.	.	.	.	.	.	.	.	.	.	.	Yuen2017	1-0751-003	FAM_1-0751-003	SPX	1-0751-002	1-0751-001	M		NA	NA
1393	7-0215-003||10_118699517_C_T	genome	NDD	autism	10_118699517_C_T	10	118699517	C	T	57698	KIAA1598	-	intron			intronic	SHTN1	.	.	.	.	.	.	.	.	.	.	.	.	.	.	.	.	.	.	Yuen2017	7-0215-003	FAM_7-0215-003	SPX	7-0215-002	7-0215-001	M		NA	NA
1394	2-1266-003||10_118700511_T_C	genome	NDD	autism	10_118700511_T_C	10	118700511	T	C	57698	KIAA1598	-	intron			intronic	SHTN1	.	.	.	.	.	.	.	.	.	.	.	.	.	.	.	.	.	.	Yuen2016	2-1266-003	FAM_2-1266-003	SPX	2-1266-002	2-1266-001	F		NA	NA
1395	14404.p1||10_118702516_G_A	genome	NDD	autism	10_118702516_G_A	10	118702516	G	A	57698	KIAA1598	-	intron			intronic	SHTN1	.	.	.	.	.	.	.	.	.	.	.	.	.	.	.	.	.	.	Turner_2017;SSC	14404.p1	;14404	;simplex	;14404.f1	;14404.m1	;male	;20	NA;463	NA;433
1396	13838.p1||10_118704664_A_G	genome	NDD	autism	10_118704664_A_G	10	118704664	A	G	57698	KIAA1598	-	intron	LINE	1	intronic	SHTN1	.	.	.	.	.	.	.	.	.	.	.	.	.	.	.	.	.	.	SSC	13838.p1	13838	simplex	13838.f1	13838.m1	male	37	439	477
1397	13066.p1||10_118740827_G_A	genome	NDD	autism	10_118740827_G_A	10	118740827	G	A	57698	KIAA1598	-	intron	SINE	1	intronic	SHTN1	.	.	.	.	.	.	.	.	.	.	.	.	.	.	.	.	.	.	Turner_2017;SSC	13066.p1	;13066	;simplex	;13066.f1	;13066.m1	;male	;121	NA;424	NA;435
1398	1-0834-003||10_118741485_C_T	genome	NDD	autism	10_118741485_C_T	10	118741485	C	T	57698	KIAA1598	-	intron	SINE	1	intronic	SHTN1	.	.	.	.	.	.	.	.	.	.	.	.	.	.	.	.	.	.	Yuen2017	1-0834-003	FAM_1-0834-003	MPX	1-0834-002	1-0834-001	M		NA	NA
1399	13850.p1||10_118749874_T_C	genome	NDD	autism	10_118749874_T_C	10	118749874	T	C	57698	KIAA1598	-	intron	LTR	1	intronic	SHTN1	.	.	.	.	.	.	.	.	.	.	.	.	.	.	.	.	.	.	SSC	13850.p1	13850	simplex	13850.f1	13850.m1	female	96	386	390
1400	12367.s1||10_11875431_G_A	genome	control	control	10_11875431_G_A	10	11875431	G	A	254427	C10orf47	+	intron	SINE	1	intronic	PROSER2	.	.	.	.	.	.	.	.	.	.	.	.	.	.	.	.	.	.	Turner_2017	12367.s1							NA	NA
1401	13939.s1||10_118759283_G_A	genome	control	control	10_118759283_G_A	10	118759283	G	A	57698	KIAA1598	-	intron	SINE	1	intronic	SHTN1	.	.	.	.	.	.	.	.	.	.	.	.	.	.	.	.	.	.	Turner_2017	13939.s1							NA	NA
1402	13613.s1||10_118759366_G_T	genome	control	control	10_118759366_G_T	10	118759366	G	T	57698	KIAA1598	-	intron	SINE	1	intronic	SHTN1	.	.	.	.	.	.	.	.	.	.	.	.	.	.	.	.	.	.	SSC	13613.s1	13613	simplex	13613.f1	13613.m1	female	.	386	322
1403	12706.s1||10_118764522_G_A	genome	control	control	10_118764522_G_A	10	118764522	G	A	57698	KIAA1598	-	intron			intronic	SHTN1	.	.	.	.	.	.	.	.	.	.	.	.	.	.	.	.	.	.	Turner_2017;SSC	12706.s1	;12706	;simplex	;12706.f1	;12706.m1	;female	;.	NA;427	NA;386
1404	3-0018-000||10_118766801_C_A	genome	NDD	autism	10_118766801_C_A	10	118766801	C	A	57698	KIAA1598	-	intron			intronic	SHTN1	.	.	.	.	.	.	.	.	.	.	.	.	.	.	.	.	.	.	Yuen2017	3-0018-000	FAM_3-0018-101	SPX	3-0018-101	3-0018-100	M		NA	NA
1405	14551.p1||10_118772548_T_G	genome	NDD	autism	10_118772548_T_G	10	118772548	T	G	57698	KIAA1598	-	intron	SINE	1	intronic	SHTN1	.	.	.	.	.	.	.	.	.	.	.	.	.	.	.	.	.	.	SSC	14551.p1	14551	simplex	14551.f1	14551.m1	male	127	479	427
1406	11164.s1||10_118779766_C_T	genome	control	control	10_118779766_C_T	10	118779766	C	T	57698	KIAA1598	-	intron	SINE	1	intronic	SHTN1	.	.	.	.	.	.	.	.	.	.	.	.	.	.	.	.	.	.	SSC	11164.s1	11164	simplex	11164.f1	11164.m1	female	.	359	347
1407	11360.p1||10_118784935_A_G	genome	NDD	autism	10_118784935_A_G	10	118784935	A	G	57698	KIAA1598	-	intron	LINE	1	intronic	SHTN1	.	.	.	.	.	.	.	.	.	.	.	.	.	.	.	.	.	.	SSC	11360.p1	11360	simplex	11360.f1	11360.m1	male	108	387	352
1408	2-1206-003||10_118787134_C_T	genome	NDD	autism	10_118787134_C_T	10	118787134	C	T	57698	KIAA1598	-	intron	SINE	1	intronic	SHTN1	.	.	.	.	.	.	.	.	.	.	.	.	.	.	.	.	.	.	Yuen2017	2-1206-003	FAM_2-1206-003	SPX	2-1206-002	2-1206-001	M		NA	NA
1409	gonl-60c||10_118789156_C_G	genome	control	control	10_118789156_C_G	10	118789156	C	G	57698	KIAA1598	-	intron	LTR	1	intronic	SHTN1	.	.	.	.	.	.	.	.	.	.	.	.	.	.	.	.	.	.	GONL	gonl-60c							NA	NA
1410	12396.s1||10_118793890_C_T	genome	control	control	10_118793890_C_T	10	118793890	C	T	57698	KIAA1598	-	intron	SINE	1	intronic	SHTN1	.	.	.	.	.	.	.	.	.	.	.	.	.	.	.	.	.	.	SSC	12396.s1	12396	simplex	12396.f1	12396.m1	female	.	483	376
1411	AU3849303||10_118794160_A_G	genome	NDD	autism	10_118794160_A_G	10	118794160	A	G	57698	KIAA1598	-	intron	SINE	1	intronic	SHTN1	.	.	.	.	.	.	.	.	.	.	.	.	.	.	.	.	.	.	Yuen2017	AU3849303	FAM_AU3849303	MPX	AU3849201	AU3849202	M		NA	NA
1412	13506.p1||10_118795285_C_T	genome	NDD	autism	10_118795285_C_T	10	118795285	C	T	57698	KIAA1598	-	intron	SINE	1	intronic	SHTN1	.	.	.	.	.	.	.	.	.	.	.	.	.	.	.	.	.	.	SSC	13506.p1	13506	simplex	13506.f1	13506.m1	male	78	364	265
1413	12341.p1||10_118819714_A_G	genome	NDD	autism	10_118819714_A_G	10	118819714	A	G	57698	KIAA1598	-	intron	SINE	1	intronic	SHTN1	.	.	.	.	.	.	.	.	.	.	.	.	.	.	.	.	.	.	SSC	12341.p1	12341	simplex	12341.f1	12341.m1	male	117	370	374
1414	12716.p1||10_118839134_C_T	genome	NDD	autism	10_118839134_C_T	10	118839134	C	T	57698	KIAA1598	-	intron	LINE	1	intronic	SHTN1	.	.	.	.	.	.	.	.	.	.	.	.	.	.	.	.	.	.	Turner_2017	12716.p1							NA	NA
1415	13340.p1||10_118839193_A_G	genome	NDD	autism	10_118839193_A_G	10	118839193	A	G	57698	KIAA1598	-	intron	LINE	1	intronic	SHTN1	.	.	.	.	.	.	.	.	.	.	.	.	.	.	.	.	.	.	Turner_2017	13340.p1							NA	NA
1416	14161.s1||10_118839252_A_T	genome	control	control	10_118839252_A_T	10	118839252	A	T	57698	KIAA1598	-	intron	LINE	1	intronic	SHTN1	.	.	.	.	.	.	.	.	.	.	.	.	.	.	.	.	.	.	Turner_2017	14161.s1							NA	NA
1417	13251.s1||10_118839451_C_T	genome	control	control	10_118839451_C_T	10	118839451	C	T	57698	KIAA1598	-	intron	LINE	1	intronic	SHTN1	.	.	.	.	.	.	.	.	.	.	.	.	.	.	.	.	.	.	Turner_2017	13251.s1							NA	NA
1418	13290.p1||10_118840201_T_A	genome	NDD	autism	10_118840201_T_A	10	118840201	T	A	57698	KIAA1598	-	intron	LINE	1	intronic	SHTN1	.	.	.	.	.	.	.	.	.	.	.	.	.	.	.	.	.	.	Turner_2017	13290.p1							NA	NA
1419	14574.s1||10_118841555_G_T	genome	control	control	10_118841555_G_T	10	118841555	G	T	57698	KIAA1598	-	intron	LINE	1	intronic	SHTN1	.	.	.	.	.	.	.	.	.	.	.	.	.	.	.	.	.	.	Turner_2017	14574.s1							NA	NA
1420	14395.p1||10_118860334_A_G	genome	NDD	autism	10_118860334_A_G	10	118860334	A	G	57698	KIAA1598	-	intron	LINE	1	intronic	SHTN1	.	.	.	.	.	.	.	.	.	.	.	.	.	.	.	.	.	.	SSC	14395.p1	14395	simplex	14395.f1	14395.m1	female	104	484	490
1421	11845.s1||10_118876759_T_C	genome	control	control	10_118876759_T_C	10	118876759	T	C	57698	KIAA1598	-	intron	LINE	1	intronic	SHTN1	.	.	.	.	.	.	.	.	.	.	.	.	.	.	.	.	.	.	Turner_2017;SSC	11845.s1	;11845	;simplex	;11845.f1	;11845.m1	;female	;.	NA;369	NA;334
1422	11146.p1||10_11887882_G_A	genome	NDD	autism	10_11887882_G_A	10	11887882	G	A	254427	C10orf47	+	intron			intronic	PROSER2	.	.	.	.	.	.	.	.	.	.	.	.	.	.	.	.	.	.	SSC	11146.p1	11146	simplex	11146.f1	11146.m1	male	87	279	247
1423	12969.s1||10_118880754_A_G	genome	control	control	10_118880754_A_G	10	118880754	A	G	57698	KIAA1598	-	intron			intronic	SHTN1	.	.	.	.	.	.	.	.	.	.	.	.	.	.	.	.	.	.	SSC	12969.s1	12969	simplex	12969.f1	12969.m1	male	.	513	436
1424	14594.p1||10_118883190_T_A	genome	NDD	autism	10_118883190_T_A	10	118883190	T	A	57698	KIAA1598	-	intron	SINE	1	intronic	SHTN1	.	.	.	.	.	.	.	.	.	.	.	.	.	.	.	.	.	.	Turner_2017	14594.p1							NA	NA
1425	1-0497-003||10_118885731_T_C	genome	NDD	autism	10_118885731_T_C	10	118885731	T	C	57698	KIAA1598	-	intron			intronic	SHTN1	.	.	.	.	.	.	.	.	.	.	.	.	.	.	.	.	.	.	Yuen2017	1-0497-003	FAM_1-0497-003	SPX	1-0497-002	1-0497-001	M		NA	NA
1426	12073.s1||10_11892015_C_T	genome	control	control	10_11892015_C_T	10	11892015	C	T	254427	C10orf47	+	intron	LTR	1	ncRNA_exonic	PROSER2-AS1	.	.	.	.	.	.	.	.	.	.	.	.	.	.	.	.	.	.	SSC	12073.s1	12073	simplex	12073.f1	12073.m1	female	.	360	365
1427	11563.s1||10_118962808_G_T	genome	control	control	10_118962808_G_T	10	118962808	G	T	338567	KCNK18	+	intron	SINE	1	intronic	KCNK18	.	.	.	.	.	.	.	.	.	.	.	.	.	.	.	.	.	.	SSC	11563.s1	11563	simplex	11563.f1	11563.m1	female	.	450	383
1428	AU4176302||10_119004244_C_T	genome	NDD	autism	10_119004244_C_T	10	119004244	C	T	6571	SLC18A2	+	intron			intronic	SLC18A2	.	.	.	.	.	.	.	.	.	.	.	.	.	.	.	.	.	.	Yuen2017	AU4176302	FAM_AU4176302	SPX	AU4176201	AU4176202	M		NA	NA
1429	12295.s1||10_119005324_A_C	genome	control	control	10_119005324_A_C	10	119005324	A	C	6571	SLC18A2	+	intron			intronic	SLC18A2	.	.	.	.	.	.	.	.	.	.	.	.	.	.	.	.	.	.	SSC	12295.s1	12295	simplex	12295.f1	12295.m1	male	.	301	283
1430	AU070703||10_119006066_A_G	genome	NDD	autism	10_119006066_A_G	10	119006066	A	G	6571	SLC18A2	+	intron			intronic	SLC18A2	.	.	.	.	.	.	.	.	.	.	.	.	.	.	.	.	.	.	Yuen2017	AU070703	FAM_AU070703	MPX	AU070702	AU070701	M		NA	NA
1431	11499.p1||10_119008853_G_A	genome	NDD	autism	10_119008853_G_A	10	119008853	G	A	6571	SLC18A2	+	intron			intronic	SLC18A2	.	.	.	.	.	.	.	.	.	.	.	.	.	.	.	.	.	.	SSC	11499.p1	11499	simplex	11499.f1	11499.m1	male	139	401	406
1432	1-0153-004||10_119042795_G_A	genome	NDD	autism	10_119042795_G_A	10	119042795	G	A	118987	PDZD8	-	CDS			exonic	PDZD8	.	nonsynonymous SNV	PDZD8:NM_173791:exon5:c.C3449T:p.P1150L	D	B	B	N	D	N	D	N	T	T	D	D	23.3	1.048	0.999	Yuen2017	1-0153-004	FAM_1-0153-005	MPX	1-0153-002	1-0153-001	M		NA	NA
1433	AU046904||10_119043267_G_A	genome	NDD	autism	10_119043267_G_A	10	119043267	G	A	118987	PDZD8	-	CDS			exonic	PDZD8	.	nonsynonymous SNV	PDZD8:NM_173791:exon5:c.C2977T:p.R993W	D	D	D	D	D	L	D	D	D	D	D	D	27.8	1.048	0.982	Yuen2017	AU046904	FAM_AU046904	MPX	AU046902	AU046901	M		NA	NA
1434	AU3807302||10_119044968_A_G	genome	NDD	autism	10_119044968_A_G	10	119044968	A	G	118987	PDZD8	-	CDS			exonic	PDZD8	.	nonsynonymous SNV	PDZD8:NM_173791:exon5:c.T1276C:p.S426P	D	D	D	D	D	M	T	D	D	D	D	D	25.6	1.14	0.874	Yuen2017	AU3807302	FAM_AU3807302	MPX	AU3807201	AU3807202	M		NA	NA
1435	12062.s1||10_119048418_G_A	genome	control	control	10_119048418_G_A	10	119048418	G	A	118987	PDZD8	-	intron			intronic	PDZD8	.	.	.	.	.	.	.	.	.	.	.	.	.	.	.	.	.	.	SSC	12062.s1	12062	simplex	12062.f1	12062.m1	female	.	577	407
1436	13042.p1||10_11905495_C_G	genome	NDD	autism	10_11905495_C_G	10	11905495	C	G	254427	C10orf47	+	intron	SINE	1	ncRNA_intronic	PROSER2-AS1	.	.	.	.	.	.	.	.	.	.	.	.	.	.	.	.	.	.	SSC	13042.p1	13042	simplex	13042.f1	13042.m1	male	79	369	355
1437	11561.s1||10_119056036_A_G	genome	control	control	10_119056036_A_G	10	119056036	A	G	118987	PDZD8	-	intron	LINE	1	intronic	PDZD8	.	.	.	.	.	.	.	.	.	.	.	.	.	.	.	.	.	.	Turner_2017;SSC	11561.s1	;11561	;simplex	;11561.f1	;11561.m1	;male	;.	NA;390	NA;392
1438	11225.p1||10_119061971_C_G	genome	NDD	autism	10_119061971_C_G	10	119061971	C	G	118987	PDZD8	-	intron			intronic	PDZD8	.	.	.	.	.	.	.	.	.	.	.	.	.	.	.	.	.	.	SSC	11225.p1	11225	simplex	11225.f1	11225.m1	male	98	429	326
1439	14172.p1||10_119073034_C_T	genome	NDD	autism	10_119073034_C_T	10	119073034	C	T	118987	PDZD8	-	intron	LINE	1	intronic	PDZD8	.	.	.	.	.	.	.	.	.	.	.	.	.	.	.	.	.	.	SSC	14172.p1	14172	simplex	14172.f1	14172.m1	male	91	455	347
1440	14012.s1||10_119081653_T_C	genome	control	control	10_119081653_T_C	10	119081653	T	C	118987	PDZD8	-	intron	LTR	1	intronic	PDZD8	.	.	.	.	.	.	.	.	.	.	.	.	.	.	.	.	.	.	SSC	14012.s1	14012	simplex	14012.f1	14012.m1	female	.	418	375
1441	2-1085-004||10_119092061_A_C	genome	NDD	autism	10_119092061_A_C	10	119092061	A	C	118987	PDZD8	-	intron	SINE	1	intronic	PDZD8	.	.	.	.	.	.	.	.	.	.	.	.	.	.	.	.	.	.	Yuen2017	2-1085-004	FAM_2-1085-004	MPX	2-1085-002	2-1085-001	M		NA	NA
1442	12086.p1||10_119110849_C_T	genome	NDD	autism	10_119110849_C_T	10	119110849	C	T	118987	PDZD8	-	intron	LINE	1	intronic	PDZD8	.	.	.	.	.	.	.	.	.	.	.	.	.	.	.	.	.	.	Turner_2017;SSC	12086.p1	;12086	;simplex	;12086.f1	;12086.m1	;male	;108	NA;456	NA;425
1443	13855.s1||10_119117635_T_C	genome	control	control	10_119117635_T_C	10	119117635	T	C	118987	PDZD8	-	intron			intronic	PDZD8	.	.	.	.	.	.	.	.	.	.	.	.	.	.	.	.	.	.	SSC	13855.s1	13855	simplex	13855.f1	13855.m1	female	.	473	498
1444	AU3763305||10_119126206_T_A	genome	NDD	autism	10_119126206_T_A	10	119126206	T	A	118987	PDZD8	-	intron			intronic	PDZD8	.	.	.	.	.	.	.	.	.	.	.	.	.	.	.	.	.	.	Yuen2017	AU3763305	FAM_AU3763305	SPX	AU3763201	AU3763202	M		NA	NA
1445	AU002405||10_119130557_C_T	genome	NDD	autism	10_119130557_C_T	10	119130557	C	T	118987	PDZD8	-	intron	SINE	1	intronic	PDZD8	.	.	.	.	.	.	.	.	.	.	.	.	.	.	.	.	.	.	Yuen2017	AU002405	FAM_AU002406	MPX	AU002402	AU002401	M		NA	NA
1446	13952.p1||10_11916465_C_G	genome	NDD	autism	10_11916465_C_G	10	11916465	C	G	219731	LOC219731	-	intron			ncRNA_intronic	PROSER2-AS1	.	.	.	.	.	.	.	.	.	.	.	.	.	.	.	.	.	.	Turner_2017;SSC	13952.p1	;13952	;simplex	;13952.f1	;13952.m1	;male	;15	NA;395	NA;331
1447	14496.s1||10_11918747_C_T	genome	control	control	10_11918747_C_T	10	11918747	C	T	219731	LOC219731	-	intron	SINE	1	ncRNA_intronic	PROSER2-AS1	.	.	.	.	.	.	.	.	.	.	.	.	.	.	.	.	.	.	Turner_2017;SSC	14496.s1	;14496	;simplex	;14496.f1	;14496.m1	;male	;.	NA;564	NA;463
1448	11597.p1||10_11920909_C_T	genome	NDD	autism	10_11920909_C_T	10	11920909	C	T	219731	LOC219731	-	intron			ncRNA_intronic	PROSER2-AS1	.	.	.	.	.	.	.	.	.	.	.	.	.	.	.	.	.	.	Turner_2017;SSC	11597.p1	;11597	;simplex	;11597.f1	;11597.m1	;male	;118	NA;340	NA;344
1449	2-1169-003||10_119245797_C_T	genome	NDD	autism	10_119245797_C_T	10	119245797	C	T	196047	EMX2OS	-	exon_unclassified	LTR	1	ncRNA_exonic	EMX2OS	.	.	.	.	.	.	.	.	.	.	.	.	.	.	.	.	.	.	Yuen2017	2-1169-003	FAM_2-1169-004	MPX	2-1169-002	2-1169-001	F		NA	NA
1450	3-0080-000||10_119246484_C_T	genome	NDD	autism	10_119246484_C_T	10	119246484	C	T	196047	EMX2OS	-	exon_unclassified			ncRNA_exonic	EMX2OS	.	.	.	.	.	.	.	.	.	.	.	.	.	.	.	.	.	.	Yuen2016	3-0080-000	FAM_3-0080-101	SPX	3-0080-101	3-0080-100	M		NA	NA
1451	AU3371303||10_119262954_A_G	genome	NDD	autism	10_119262954_A_G	10	119262954	A	G	196047	EMX2OS	-	intron			ncRNA_intronic	EMX2OS	.	.	.	.	.	.	.	.	.	.	.	.	.	.	.	.	.	.	Yuen2017	AU3371303	FAM_AU3371305	MPX	AU3371201	AU3371202	M		NA	NA
1452	13026.p1||10_119274700_A_G	genome	NDD	autism	10_119274700_A_G	10	119274700	A	G	196047	EMX2OS	-	intron			ncRNA_intronic	EMX2OS	.	.	.	.	.	.	.	.	.	.	.	.	.	.	.	.	.	.	Turner_2017;SSC	13026.p1	;13026	;simplex	;13026.f1	;13026.m1	;male	;96	NA;300	NA;306
1453	11466.p1||10_119292833_T_C	genome	NDD	autism	10_119292833_T_C	10	119292833	T	C	196047	EMX2OS	-	intron			ncRNA_intronic	EMX2OS	.	.	.	.	.	.	.	.	.	.	.	.	.	.	.	.	.	.	SSC	11466.p1	11466	simplex	11466.f1	11466.m1	male	121	310	316
1454	13944.s1||10_11929639_C_T	genome	control	control	10_11929639_C_T	10	11929639	C	T	219731	LOC219731	-	intron			ncRNA_intronic	PROSER2-AS1	.	.	.	.	.	.	.	.	.	.	.	.	.	.	.	.	.	.	SSC	13944.s1	13944	simplex	13944.f1	13944.m1	male	.	353	339
1455	14243.s1||10_11929665_G_A	genome	control	control	10_11929665_G_A	10	11929665	G	A	219731	LOC219731	-	intron			ncRNA_intronic	PROSER2-AS1	.	.	.	.	.	.	.	.	.	.	.	.	.	.	.	.	.	.	SSC	14243.s1	14243	simplex	14243.f1	14243.m1	female	.	331	302
1456	13952.p1||10_119299410_G_A	genome	NDD	autism	10_119299410_G_A	10	119299410	G	A	196047	EMX2OS	-	intron			ncRNA_intronic	EMX2OS	.	.	.	.	.	.	.	.	.	.	.	.	.	.	.	.	.	.	Turner_2017;SSC	13952.p1	;13952	;simplex	;13952.f1	;13952.m1	;male	;15	NA;395	NA;331
1457	2-1359-003||10_119306498_T_C	genome	NDD	autism	10_119306498_T_C	10	119306498	T	C	2018	EMX2	+	intron			intronic	EMX2	.	.	.	.	.	.	.	.	.	.	.	.	.	.	.	.	.	.	Yuen2017	2-1359-003	FAM_2-1359-004	MPX	2-1359-002	2-1359-001	M		NA	NA
1458	1-0073-003||10_119306923_T_A	genome	NDD	autism	10_119306923_T_A	10	119306923	T	A	2018	EMX2	+	intron			intronic	EMX2	.	.	.	.	.	.	.	.	.	.	.	.	.	.	.	.	.	.	Yuen2017	1-0073-003	FAM_1-0073-003	SPX	1-0073-002	1-0073-001	F		NA	NA
1459	13486.p1||10_11931192_G_A	genome	NDD	autism	10_11931192_G_A	10	11931192	G	A	219731	LOC219731	-	intron	SINE	1	ncRNA_intronic	PROSER2-AS1	.	.	.	.	.	.	.	.	.	.	.	.	.	.	.	.	.	.	Turner_2017	13486.p1							NA	NA
1460	2-0242-003||10_11932877_A_T	genome	NDD	autism	10_11932877_A_T	10	11932877	A	T	219731	LOC219731	-	intron			ncRNA_intronic	PROSER2-AS1	.	.	.	.	.	.	.	.	.	.	.	.	.	.	.	.	.	.	Yuen2017	2-0242-003	FAM_2-0242-005	MPX	2-0242-002	2-0242-001	M		NA	NA
1461	12645.p1||10_11967170_A_C	genome	NDD	autism	10_11967170_A_C	10	11967170	A	C	26019	UPF2	-	intron			intronic	UPF2	.	.	.	.	.	.	.	.	.	.	.	.	.	.	.	.	.	.	SSC	12645.p1	12645	simplex	12645.f1	12645.m1	male	84	445	393
1462	12645.s1||10_11967170_A_C	genome	control	control	10_11967170_A_C	10	11967170	A	C	26019	UPF2	-	intron			intronic	UPF2	.	.	.	.	.	.	.	.	.	.	.	.	.	.	.	.	.	.	SSC	12645.s1	12645	simplex	12645.f1	12645.m1	male	.	359	307
1463	12645.p1||10_11967175_C_A	genome	NDD	autism	10_11967175_C_A	10	11967175	C	A	26019	UPF2	-	intron			intronic	UPF2	.	.	.	.	.	.	.	.	.	.	.	.	.	.	.	.	.	.	SSC	12645.p1	12645	simplex	12645.f1	12645.m1	male	84	445	393
1464	12645.s1||10_11967175_C_A	genome	control	control	10_11967175_C_A	10	11967175	C	A	26019	UPF2	-	intron			intronic	UPF2	.	.	.	.	.	.	.	.	.	.	.	.	.	.	.	.	.	.	SSC	12645.s1	12645	simplex	12645.f1	12645.m1	male	.	359	307
1465	13332.s1||10_11967514_C_T	genome	control	control	10_11967514_C_T	10	11967514	C	T	26019	UPF2	-	intron	LINE	1	intronic	UPF2	.	.	.	.	.	.	.	.	.	.	.	.	.	.	.	.	.	.	SSC	13332.s1	13332	simplex	13332.f1	13332.m1	male	.	374	382
1466	12346.p1||10_11975595_A_C	genome	NDD	autism	10_11975595_A_C	10	11975595	A	C	26019	UPF2	-	intron			intronic	UPF2	.	.	.	.	.	.	.	.	.	.	.	.	.	.	.	.	.	.	SSC	12346.p1	12346	simplex	12346.f1	12346.m1	male	77	517	418
1467	2-1690-003||10_119773752_A_C	genome	NDD	autism	10_119773752_A_C	10	119773752	A	C	22841	RAB11FIP2	-	intron			intronic	RAB11FIP2	.	.	.	.	.	.	.	.	.	.	.	.	.	.	.	.	.	.	Yuen2017	2-1690-003	FAM_2-1690-003	SPX	2-1690-002	2-1690-001	M		NA	NA
1468	AU3702307||10_119778382_C_T	genome	NDD	autism	10_119778382_C_T	10	119778382	C	T	22841	RAB11FIP2	-	intron			intronic	RAB11FIP2	.	.	.	.	.	.	.	.	.	.	.	.	.	.	.	.	.	.	Yuen2017	AU3702307	FAM_AU3702307	MPX	AU3702201	AU3702202	F		NA	NA
1469	12622.p1||10_119790966_A_G	genome	NDD	autism	10_119790966_A_G	10	119790966	A	G	22841	RAB11FIP2	-	intron			intronic	RAB11FIP2	.	.	.	.	.	.	.	.	.	.	.	.	.	.	.	.	.	.	SSC	12622.p1	12622	simplex	12622.f1	12622.m1	male	97	421	424
1470	13006.p1||10_119793950_C_G	genome	NDD	autism	10_119793950_C_G	10	119793950	C	G	22841	RAB11FIP2	-	intron			intronic	RAB11FIP2	.	.	.	.	.	.	.	.	.	.	.	.	.	.	.	.	.	.	SSC	13006.p1	13006	simplex	13006.f1	13006.m1	male	56	322	284
1471	14386.s1||10_119797483_T_C	genome	control	control	10_119797483_T_C	10	119797483	T	C	22841	RAB11FIP2	-	intron	DNA	1	intronic	RAB11FIP2	.	.	.	.	.	.	.	.	.	.	.	.	.	.	.	.	.	.	SSC	14386.s1	14386	simplex	14386.f1	14386.m1	female	.	475	385
1472	13008.p1||10_119814959_G_A	genome	NDD	autism	10_119814959_G_A	10	119814959	G	A	255082	CASC2	+	exon_unclassified			ncRNA_intronic	CASC2	.	.	.	.	.	.	.	.	.	.	.	.	.	.	.	.	.	.	SSC	13008.p1	13008	simplex	13008.f1	13008.m1	male	50	428	397
1473	11033.s1||10_119825499_G_A	genome	control	control	10_119825499_G_A	10	119825499	G	A	255082	CASC2	+	intron	LTR	1	ncRNA_intronic	CASC2	.	.	.	.	.	.	.	.	.	.	.	.	.	.	.	.	.	.	SSC	11033.s1	11033	simplex	11033.f1	11033.m1	female	.	451	476
1474	13975.p1||10_119851500_G_A	genome	NDD	autism	10_119851500_G_A	10	119851500	G	A	255082	CASC2	+	intron	LINE	1	ncRNA_intronic	CASC2	.	.	.	.	.	.	.	.	.	.	.	.	.	.	.	.	.	.	SSC	13975.p1	13975	simplex	13975.f1	13975.m1	male	32	432	324
1475	13097.p1||10_11985321_A_G	genome	NDD	autism	10_11985321_A_G	10	11985321	A	G	26019	UPF2	-	intron			intronic	UPF2	.	.	.	.	.	.	.	.	.	.	.	.	.	.	.	.	.	.	SSC	13097.p1	13097	simplex	13097.f1	13097.m1	male	37	474	417
1476	2-0286-003||10_11990024_A_G	genome	NDD	autism	10_11990024_A_G	10	11990024	A	G	26019	UPF2	-	intron	SINE	1	intronic	UPF2	.	.	.	.	.	.	.	.	.	.	.	.	.	.	.	.	.	.	Yuen2017	2-0286-003	FAM_2-0286-004	MPX	2-0286-002	2-0286-001	M		NA	NA
1477	5-0128-003||10_11990510_T_G	genome	NDD	autism	10_11990510_T_G	10	11990510	T	G	26019	UPF2	-	intron			intronic	UPF2	.	.	.	.	.	.	.	.	.	.	.	.	.	.	.	.	.	.	Yuen2017	5-0128-003	FAM_5-0128-003	SPX	5-0128-002	5-0128-001	M		NA	NA
1478	11360.s1||10_119914360_C_T	genome	control	control	10_119914360_C_T	10	119914360	C	T	255082	CASC2	+	intron	LINE	1	ncRNA_intronic	CASC2	.	.	.	.	.	.	.	.	.	.	.	.	.	.	.	.	.	.	SSC	11360.s1	11360	simplex	11360.f1	11360.m1	female	.	418	383
1479	11505.s1||10_119933002_A_G	genome	control	control	10_119933002_A_G	10	119933002	A	G	255082	CASC2	+	intron			ncRNA_intronic	CASC2	.	.	.	.	.	.	.	.	.	.	.	.	.	.	.	.	.	.	SSC	11505.s1	11505	simplex	11505.f1	11505.m1	female	.	331	306
1480	13780.s1||10_12001579_T_C	genome	control	control	10_12001579_T_C	10	12001579	T	C	26019	UPF2	-	intron	SINE	1	intronic	UPF2	.	.	.	.	.	.	.	.	.	.	.	.	.	.	.	.	.	.	Turner_2017;SSC	13780.s1	;13780	;simplex	;13780.f1	;13780.m1	;male	;.	NA;320	NA;315
1481	2-1195-003||10_12005355_G_A	genome	NDD	autism	10_12005355_G_A	10	12005355	G	A	26019	UPF2	-	intron	SINE	1	intronic	UPF2	.	.	.	.	.	.	.	.	.	.	.	.	.	.	.	.	.	.	Yuen2017	2-1195-003	FAM_2-1195-003	SPX	2-1195-002	2-1195-001	M		NA	NA
1482	14135.s1||10_120073957_T_A	genome	control	control	10_120073957_T_A	10	120073957	T	A	63877	FAM204A	-	intron			intronic	FAM204A	.	.	.	.	.	.	.	.	.	.	.	.	.	.	.	.	.	.	SSC	14135.s1	14135	simplex	14135.f1	14135.m1	female	.	416	430
1483	1-0079-008||10_120081338_A_T	genome	NDD	autism	10_120081338_A_T	10	120081338	A	T	63877	FAM204A	-	intron			intronic	FAM204A	.	.	.	.	.	.	.	.	.	.	.	.	.	.	.	.	.	.	Yuen2017	1-0079-008	FAM_1-0079-008	SPX	1-0079-006	1-0079-005	M		NA	NA
1484	AU1223303||10_120087889_C_T	genome	NDD	autism	10_120087889_C_T	10	120087889	C	T	63877	FAM204A	-	intron	DNA	1	intronic	FAM204A	.	.	.	.	.	.	.	.	.	.	.	.	.	.	.	.	.	.	Yuen2017	AU1223303	FAM_AU1223303	MPX	AU1223201	AU1223202	M		NA	NA
1485	12743.s1||10_120090061_G_A	genome	control	control	10_120090061_G_A	10	120090061	G	A	63877	FAM204A	-	intron	SINE	1	intronic	FAM204A	.	.	.	.	.	.	.	.	.	.	.	.	.	.	.	.	.	.	SSC	12743.s1	12743	simplex	12743.f1	12743.m1	male	.	286	313
1486	12989.p1||10_120095571_T_G	genome	NDD	autism	10_120095571_T_G	10	120095571	T	G	63877	FAM204A	-	intron			intronic	FAM204A	.	.	.	.	.	.	.	.	.	.	.	.	.	.	.	.	.	.	Turner_2017;SSC	12989.p1	;12989	;simplex	;12989.f1	;12989.m1	;male	;83	NA;534	NA;411
1487	14031.p1||10_120098945_A_G	genome	NDD	autism	10_120098945_A_G	10	120098945	A	G	63877	FAM204A	-	intron	RC	1	intronic	FAM204A	.	.	.	.	.	.	.	.	.	.	.	.	.	.	.	.	.	.	Turner_2017;SSC	14031.p1	;14031	;simplex	;14031.f1	;14031.m1	;male	;53	NA;343	NA;458
1488	2-1406-003||10_12010988_T_C	genome	NDD	autism	10_12010988_T_C	10	12010988	T	C	26019	UPF2	-	intron	SINE	1	intronic	UPF2	.	.	.	.	.	.	.	.	.	.	.	.	.	.	.	.	.	.	Yuen2016	2-1406-003	FAM_2-1406-003	SPX	2-1406-002	2-1406-001	M		NA	NA
1489	gonl-2c||10_12031435_T_C	genome	control	control	10_12031435_T_C	10	12031435	T	C	26019	UPF2	-	intron	SINE	1	intronic	UPF2	.	.	.	.	.	.	.	.	.	.	.	.	.	.	.	.	.	.	GONL	gonl-2c							NA	NA
1490	13338.s1||10_120354831_G_A	genome	control	control	10_120354831_G_A	10	120354831	G	A	2834	PRLHR	-	intron			intronic	PRLHR	.	.	.	.	.	.	.	.	.	.	.	.	.	.	.	.	.	.	SSC	13338.s1	13338	simplex	13338.f1	13338.m1	female	.	280	265
1491	11420.s1||10_12037010_T_A	genome	control	control	10_12037010_T_A	10	12037010	T	A	26019	UPF2	-	intron	LINE	1	intronic	UPF2	.	.	.	.	.	.	.	.	.	.	.	.	.	.	.	.	.	.	SSC	11420.s1	11420	simplex	11420.f1	11420.m1	female	.	410	343
1492	13462.s1||10_120444741_C_T	genome	control	control	10_120444741_C_T	10	120444741	C	T	143384	CACUL1	-	3'UTR			UTR3	CACUL1	NM_153810:c.*899G>A	.	.	.	.	.	.	.	.	.	.	.	.	.	.	.	.	.	Turner_2017;SSC	13462.s1	;13462	;simplex	;13462.f1	;13462.m1	;male	;.	NA;429	NA;426
1493	12955.s1||10_120448150_T_C	genome	control	control	10_120448150_T_C	10	120448150	T	C	143384	CACUL1	-	intron			intronic	CACUL1	.	.	.	.	.	.	.	.	.	.	.	.	.	.	.	.	.	.	SSC	12955.s1	12955	simplex	12955.f1	12955.m1	male	.	556	496
1494	12955.s1||10_120448152_A_G	genome	control	control	10_120448152_A_G	10	120448152	A	G	143384	CACUL1	-	intron			intronic	CACUL1	.	.	.	.	.	.	.	.	.	.	.	.	.	.	.	.	.	.	SSC	12955.s1	12955	simplex	12955.f1	12955.m1	male	.	556	496
1495	13604.s1||10_120453628_G_A	genome	control	control	10_120453628_G_A	10	120453628	G	A	143384	CACUL1	-	intron	SINE	1	intronic	CACUL1	.	.	.	.	.	.	.	.	.	.	.	.	.	.	.	.	.	.	Turner_2017;SSC	13604.s1	;13604	;simplex	;13604.f1	;13604.m1	;female	;.	NA;321	NA;252
1496	13514.s1||10_120464502_C_T	genome	control	control	10_120464502_C_T	10	120464502	C	T	143384	CACUL1	-	intron	LTR	1	intronic	CACUL1	.	.	.	.	.	.	.	.	.	.	.	.	.	.	.	.	.	.	Turner_2017;SSC	13514.s1	;13514	;simplex	;13514.f1	;13514.m1	;male	;.	NA;370	NA;340
1497	12536.s1||10_120465245_T_C	genome	control	control	10_120465245_T_C	10	120465245	T	C	143384	CACUL1	-	intron			intronic	CACUL1	.	.	.	.	.	.	.	.	.	.	.	.	.	.	.	.	.	.	SSC	12536.s1	12536	simplex	12536.f1	12536.m1	female	.	452	393
1498	12206.p1||10_120471241_T_G	genome	NDD	autism	10_120471241_T_G	10	120471241	T	G	143384	CACUL1	-	intron			intronic	CACUL1	.	.	.	.	.	.	.	.	.	.	.	.	.	.	.	.	.	.	SSC	12206.p1	12206	simplex	12206.f1	12206.m1	male	141	358	368
1499	14482.s1||10_120476394_G_A	genome	control	control	10_120476394_G_A	10	120476394	G	A	143384	CACUL1	-	intron	SINE	1	intronic	CACUL1	.	.	.	.	.	.	.	.	.	.	.	.	.	.	.	.	.	.	Turner_2017	14482.s1							NA	NA
1500	7-0140-003||10_120479919_A_G	genome	NDD	autism	10_120479919_A_G	10	120479919	A	G	143384	CACUL1	-	intron			intronic	CACUL1	.	.	.	.	.	.	.	.	.	.	.	.	.	.	.	.	.	.	Yuen2017	7-0140-003	FAM_7-0140-003	SPX	7-0140-002	7-0140-001	M		NA	NA
1501	14227.s1||10_12048113_A_G	genome	control	control	10_12048113_A_G	10	12048113	A	G	26019	UPF2	-	intron	SINE	1	intronic	UPF2	.	.	.	.	.	.	.	.	.	.	.	.	.	.	.	.	.	.	SSC	14227.s1	14227	simplex	14227.f1	14227.m1	male	.	405	397
1502	12793.s1||10_120481658_C_T	genome	control	control	10_120481658_C_T	10	120481658	C	T	143384	CACUL1	-	intron	SINE	1	intronic	CACUL1	.	.	.	.	.	.	.	.	.	.	.	.	.	.	.	.	.	.	Turner_2017;SSC	12793.s1	;12793	;simplex	;12793.f1	;12793.m1	;female	;.	NA;443	NA;395
1503	1-0604-003||10_120482492_A_G	genome	NDD	autism	10_120482492_A_G	10	120482492	A	G	143384	CACUL1	-	intron	LTR	1	intronic	CACUL1	.	.	.	.	.	.	.	.	.	.	.	.	.	.	.	.	.	.	Yuen2017	1-0604-003	FAM_1-0604-003	SPX	1-0604-002	1-0604-001	M		NA	NA
1504	13602.p1||10_120504653_G_A	genome	NDD	autism	10_120504653_G_A	10	120504653	G	A	143384	CACUL1	-	intron	LINE	1	intronic	CACUL1	.	.	.	.	.	.	.	.	.	.	.	.	.	.	.	.	.	.	SSC	13602.p1	13602	simplex	13602.f1	13602.m1	male	53	449	351
1505	13880.s1||10_120506346_C_T	genome	control	control	10_120506346_C_T	10	120506346	C	T	143384	CACUL1	-	intron	LINE	1	intronic	CACUL1	.	.	.	.	.	.	.	.	.	.	.	.	.	.	.	.	.	.	SSC	13880.s1	13880	simplex	13880.f1	13880.m1	female	.	381	376
1506	11027.p1||10_12053893_G_A	genome	NDD	autism	10_12053893_G_A	10	12053893	G	A	26019	UPF2	-	intron	SINE	1	intronic	UPF2	.	.	.	.	.	.	.	.	.	.	.	.	.	.	.	.	.	.	Turner_2017	11027.p1							NA	NA
1507	14590.s1||10_12058250_C_T	genome	control	control	10_12058250_C_T	10	12058250	C	T	26019	UPF2	-	intron	SINE	1	intronic	UPF2	.	.	.	.	.	.	.	.	.	.	.	.	.	.	.	.	.	.	Turner_2017;SSC	14590.s1	;14590	;simplex	;14590.f1	;14590.m1	;female	;.	NA;518	NA;398
1508	AU4032307||10_12058806_G_C	genome	NDD	autism	10_12058806_G_C	10	12058806	G	C	26019	UPF2	-	intron	SINE	1	intronic	UPF2	.	.	.	.	.	.	.	.	.	.	.	.	.	.	.	.	.	.	Yuen2017	AU4032307	FAM_AU4032307	MPX	AU4032201	AU4032202	M		NA	NA
1509	13007.s1||10_12059292_C_G	genome	control	control	10_12059292_C_G	10	12059292	C	G	26019	UPF2	-	intron			intronic	UPF2	.	.	.	.	.	.	.	.	.	.	.	.	.	.	.	.	.	.	SSC	13007.s1	13007	simplex	13007.f1	13007.m1	female	.	390	434
1510	7-0148-003||10_12063593_A_C	genome	NDD	autism	10_12063593_A_C	10	12063593	A	C	26019	UPF2	-	intron			intronic	UPF2	.	.	.	.	.	.	.	.	.	.	.	.	.	.	.	.	.	.	Yuen2017	7-0148-003	FAM_7-0148-003	SPX	7-0148-002	7-0148-001	M		NA	NA
1511	1-0541-004||10_12064020_T_A	genome	NDD	autism	10_12064020_T_A	10	12064020	T	A	26019	UPF2	-	intron	SINE	1	intronic	UPF2	.	.	.	.	.	.	.	.	.	.	.	.	.	.	.	.	.	.	Yuen2017	1-0541-004	FAM_1-0541-006	MPX	1-0541-002	1-0541-001	M		NA	NA
1512	1-0121-003||10_120797667_G_A	genome	NDD	autism	10_120797667_G_A	10	120797667	G	A	8661	EIF3A	-	3'UTR	SINE	1	intronic	EIF3A	.	.	.	.	.	.	.	.	.	.	.	.	.	.	.	.	.	.	Yuen2017	1-0121-003	FAM_1-0121-003	SPX	1-0121-002	1-0121-001	M		NA	NA
1513	11310.p1||10_120802470_G_C	genome	NDD	autism	10_120802470_G_C	10	120802470	G	C	8661	EIF3A	-	intron	SINE	1	intronic	EIF3A	.	.	.	.	.	.	.	.	.	.	.	.	.	.	.	.	.	.	SSC	11310.p1	11310	simplex	11310.f1	11310.m1	male	97	355	326
1514	11441.s1||10_120818850_A_G	genome	control	control	10_120818850_A_G	10	120818850	A	G	8661	EIF3A	-	CDS			exonic	EIF3A	.	synonymous SNV	EIF3A:NM_003750:exon11:c.T1503C:p.T501T	.	.	.	.	.	.	.	.	.	.	.	.	.	.	.	SSC	11441.s1	11441	simplex	11441.f1	11441.m1	male	.	403	427
1515	12057.p1||10_120826228_T_C	genome	NDD	autism	10_120826228_T_C	10	120826228	T	C	8661	EIF3A	-	intron	SINE	1	intronic	EIF3A	.	.	.	.	.	.	.	.	.	.	.	.	.	.	.	.	.	.	SSC	12057.p1	12057	simplex	12057.f1	12057.m1	male	50	375	382
1516	12011.p1||10_120835420_A_T	genome	NDD	autism	10_120835420_A_T	10	120835420	A	T	8661	EIF3A	-	intron	SINE	1	intronic	EIF3A	.	.	.	.	.	.	.	.	.	.	.	.	.	.	.	.	.	.	Turner2016	12011.p1							NA	NA
1517	12011.s1||10_120835420_A_T	genome	control	control	10_120835420_A_T	10	120835420	A	T	8661	EIF3A	-	intron	SINE	1	intronic	EIF3A	.	.	.	.	.	.	.	.	.	.	.	.	.	.	.	.	.	.	Turner2016	12011.s1							NA	NA
1518	1-0225-003||10_120864791_T_G	genome	NDD	autism	10_120864791_T_G	10	120864791	T	G	404636	FAM45A	+	intron	SINE	1	ncRNA_intronic	FAM45BP	.	.	.	.	.	.	.	.	.	.	.	.	.	.	.	.	.	.	Yuen2017	1-0225-003	FAM_1-0225-003	SPX	1-0225-002	1-0225-001	M		NA	NA
1519	2-1397-003||10_120865696_C_T	genome	NDD	autism	10_120865696_C_T	10	120865696	C	T	404636	FAM45A	+	intron	SINE	1	ncRNA_intronic	FAM45BP	.	.	.	.	.	.	.	.	.	.	.	.	.	.	.	.	.	.	Yuen2017	2-1397-003	FAM_2-1397-003	SPX	2-1397-002	2-1397-001	M		NA	NA
1520	11115.s1||10_120868067_C_G	genome	control	control	10_120868067_C_G	10	120868067	C	G	404636	FAM45A	+	intron			ncRNA_intronic	FAM45BP	.	.	.	.	.	.	.	.	.	.	.	.	.	.	.	.	.	.	Turner_2017;SSC	11115.s1	;11115	;simplex	;11115.f1	;11115.m1	;female	;.	NA;350	NA;345
1521	12011.p1||10_120877119_G_A	genome	NDD	autism	10_120877119_G_A	10	120877119	G	A	404636	FAM45A	+	CDS			exonic	FAM45A	.	nonsynonymous SNV	FAM45A:NM_001303112:exon4:c.G202A:p.G68S,FAM45A:NM_207009:exon4:c.G421A:p.G141S,FAM45A:NM_001303111:exon5:c.G397A:p.G133S	T	D	D	D	D	M	.	D	T	T	T	D	28.2	0.967	1	Turner_2017	12011.p1							NA	NA
1522	14359.s1||10_120882762_C_T	genome	control	control	10_120882762_C_T	10	120882762	C	T	404636	FAM45A	+	intron	SINE	1	ncRNA_intronic	FAM45BP	.	.	.	.	.	.	.	.	.	.	.	.	.	.	.	.	.	.	SSC	14359.s1	14359	simplex	14359.f1	14359.m1	male	.	313	377
1523	11031.s1||10_120895837_T_C	genome	control	control	10_120895837_T_C	10	120895837	T	C	404636	FAM45A	+	intron	SINE	1	ncRNA_intronic	FAM45BP	.	.	.	.	.	.	.	.	.	.	.	.	.	.	.	.	.	.	SSC	11031.s1	11031	simplex	11031.f1	11031.m1	male	.	429	408
1524	1-0206-004||10_120903231_C_T	genome	NDD	autism	10_120903231_C_T	10	120903231	C	T	119559	SFXN4	-	intron	SINE	1	intronic	SFXN4	.	.	.	.	.	.	.	.	.	.	.	.	.	.	.	.	.	.	Yuen2017	1-0206-004	FAM_1-0206-005	MPX	1-0206-002	1-0206-001	M		NA	NA
1525	13965.p1||10_120907882_C_T	genome	NDD	autism	10_120907882_C_T	10	120907882	C	T	119559	SFXN4	-	intron			intronic	SFXN4	.	.	.	.	.	.	.	.	.	.	.	.	.	.	.	.	.	.	Turner_2017;SSC	13965.p1	;13965	;simplex	;13965.f1	;13965.m1	;male	;93	NA;331	NA;301
1526	14313.p1||10_120913926_C_T	genome	NDD	autism	10_120913926_C_T	10	120913926	C	T	119559	SFXN4	-	intron	SINE	1	intronic	SFXN4	.	.	.	.	.	.	.	.	.	.	.	.	.	.	.	.	.	.	SSC	14313.p1	14313	simplex	14313.f1	14313.m1	male	89	420	340
1527	gonl-20c||10_120923222_C_T	genome	control	control	10_120923222_C_T	10	120923222	C	T	119559	SFXN4	-	intron			intronic	SFXN4	.	.	.	.	.	.	.	.	.	.	.	.	.	.	.	.	.	.	GONL	gonl-20c							NA	NA
1528	13850.p1||10_120933327_G_A	genome	NDD	autism	10_120933327_G_A	10	120933327	G	A	10935	PRDX3	-	CDS			exonic	PRDX3	.	synonymous SNV	PRDX3:NM_001302272:exon4:c.C369T:p.H123H,PRDX3:NM_006793:exon4:c.C369T:p.H123H	.	.	.	.	.	.	.	.	.	.	.	.	.	.	.	SSC	13850.p1	13850	simplex	13850.f1	13850.m1	female	96	386	390
1529	AU060803||10_120935580_G_C	genome	NDD	autism	10_120935580_G_C	10	120935580	G	C	10935	PRDX3	-	intron	SINE	1	intronic	PRDX3	.	.	.	.	.	.	.	.	.	.	.	.	.	.	.	.	.	.	Yuen2017	AU060803	FAM_AU060803	MPX	AU060802	AU060801	M		NA	NA
1530	AU0638302||10_120967434_A_T	genome	NDD	autism	10_120967434_A_T	10	120967434	A	T	2869	GRK5	+	CDS||5'UTR			exonic	GRK5	.	nonsynonymous SNV	GRK5:NM_005308:exon1:c.A5T:p.E2V	D	D	D	U	D	M	T	D	D	D	D	D	24.1	1.051	1	Yuen2017	AU0638302	FAM_AU0638302	MPX	AU0638201	AU0638202	M		NA	NA
1531	2-1195-003||10_120974228_C_T	genome	NDD	autism	10_120974228_C_T	10	120974228	C	T	2869	GRK5	+	intron	SINE	1	intronic	GRK5	.	.	.	.	.	.	.	.	.	.	.	.	.	.	.	.	.	.	Yuen2016	2-1195-003	FAM_2-1195-003	SPX	2-1195-002	2-1195-001	M		NA	NA
1532	AU3649305||10_120976728_T_G	genome	NDD	autism	10_120976728_T_G	10	120976728	T	G	2869	GRK5	+	intron			intronic	GRK5	.	.	.	.	.	.	.	.	.	.	.	.	.	.	.	.	.	.	Yuen2017	AU3649305	FAM_AU3649305	MPX	AU3649201	AU3649202	M		NA	NA
1533	12741.p1||10_120976924_A_G	genome	NDD	autism	10_120976924_A_G	10	120976924	A	G	2869	GRK5	+	intron			intronic	GRK5	.	.	.	.	.	.	.	.	.	.	.	.	.	.	.	.	.	.	SSC	12741.p1	12741	simplex	12741.f1	12741.m1	male	87	437	456
1534	14617.p1||10_120984082_C_T	genome	NDD	autism	10_120984082_C_T	10	120984082	C	T	2869	GRK5	+	intron	SINE	1	intronic	GRK5	.	.	.	.	.	.	.	.	.	.	.	.	.	.	.	.	.	.	SSC	14617.p1	14617	simplex	14617.f1	14617.m1	male	75	440	479
1535	12989.p1||10_120999857_C_T	genome	NDD	autism	10_120999857_C_T	10	120999857	C	T	2869	GRK5	+	intron	SINE	1	intronic	GRK5	.	.	.	.	.	.	.	.	.	.	.	.	.	.	.	.	.	.	Turner_2017;SSC	12989.p1	;12989	;simplex	;12989.f1	;12989.m1	;male	;83	NA;534	NA;411
1536	13920.s1||10_121001749_C_T	genome	control	control	10_121001749_C_T	10	121001749	C	T	2869	GRK5	+	intron			intronic	GRK5	.	.	.	.	.	.	.	.	.	.	.	.	.	.	.	.	.	.	SSC	13920.s1	13920	simplex	13920.f1	13920.m1	female	.	336	287
1537	13102.s1||10_121013772_C_A	genome	control	control	10_121013772_C_A	10	121013772	C	A	2869	GRK5	+	intron	SINE	1	intronic	GRK5	.	.	.	.	.	.	.	.	.	.	.	.	.	.	.	.	.	.	Turner_2017;SSC	13102.s1	;13102	;simplex	;13102.f1	;13102.m1	;male	;.	NA;422	NA;376
1538	11497.p1||10_121020614_T_G	genome	NDD	autism	10_121020614_T_G	10	121020614	T	G	2869	GRK5	+	intron	Other	1	intronic	GRK5	.	.	.	.	.	.	.	.	.	.	.	.	.	.	.	.	.	.	Turner_2017	11497.p1							NA	NA
1539	13961.p1||10_121020614_T_G	genome	NDD	autism	10_121020614_T_G	10	121020614	T	G	2869	GRK5	+	intron	Other	1	intronic	GRK5	.	.	.	.	.	.	.	.	.	.	.	.	.	.	.	.	.	.	Turner_2017	13961.p1							NA	NA
1540	11480.s1||10_121025695_C_T	genome	control	control	10_121025695_C_T	10	121025695	C	T	2869	GRK5	+	intron	SINE	1	intronic	GRK5	.	.	.	.	.	.	.	.	.	.	.	.	.	.	.	.	.	.	SSC	11480.s1	11480	simplex	11480.f1	11480.m1	female	.	335	279
1541	13396.s1||10_121025883_G_A	genome	control	control	10_121025883_G_A	10	121025883	G	A	2869	GRK5	+	intron	SINE	1	intronic	GRK5	.	.	.	.	.	.	.	.	.	.	.	.	.	.	.	.	.	.	SSC	13396.s1	13396	simplex	13396.f1	13396.m1	female	.	409	390
1542	2-0116-004||10_121032543_C_T	genome	NDD	autism	10_121032543_C_T	10	121032543	C	T	2869	GRK5	+	intron			intronic	GRK5	.	.	.	.	.	.	.	.	.	.	.	.	.	.	.	.	.	.	Yuen2017	2-0116-004	FAM_2-0116-005	MPX	2-0116-002	2-0116-001	M		NA	NA
1543	13981.p1||10_121034669_G_A	genome	NDD	autism	10_121034669_G_A	10	121034669	G	A	2869	GRK5	+	intron			intronic	GRK5	.	.	.	.	.	.	.	.	.	.	.	.	.	.	.	.	.	.	SSC	13981.p1	13981	simplex	13981.f1	13981.m1	male	92	468	452
1544	2-1514-003||10_121039585_A_T	genome	NDD	autism	10_121039585_A_T	10	121039585	A	T	2869	GRK5	+	intron			intronic	GRK5	.	.	.	.	.	.	.	.	.	.	.	.	.	.	.	.	.	.	Yuen2017	2-1514-003	FAM_2-1514-003	SPX	2-1514-002	2-1514-001	M		NA	NA
1545	13504.p1||10_121042396_G_A	genome	NDD	autism	10_121042396_G_A	10	121042396	G	A	2869	GRK5	+	intron			intronic	GRK5	.	.	.	.	.	.	.	.	.	.	.	.	.	.	.	.	.	.	SSC	13504.p1	13504	simplex	13504.f1	13504.m1	male	83	325	288
1546	AU2075302||10_121050708_G_A	genome	NDD	autism	10_121050708_G_A	10	121050708	G	A	2869	GRK5	+	intron			intronic	GRK5	.	.	.	.	.	.	.	.	.	.	.	.	.	.	.	.	.	.	Yuen2017	AU2075302	FAM_AU2075302	MPX	AU2075201	AU2075202	M		NA	NA
1547	14044.p1||10_121052941_A_C	genome	NDD	autism	10_121052941_A_C	10	121052941	A	C	2869	GRK5	+	intron			intronic	GRK5	.	.	.	.	.	.	.	.	.	.	.	.	.	.	.	.	.	.	SSC	14044.p1	14044	simplex	14044.f1	14044.m1	male	111	475	417
1548	2-1363-003||10_121053723_G_C	genome	NDD	autism	10_121053723_G_C	10	121053723	G	C	2869	GRK5	+	intron			intronic	GRK5	.	.	.	.	.	.	.	.	.	.	.	.	.	.	.	.	.	.	Yuen2016	2-1363-003	FAM_2-1363-003	SPX	2-1363-002	2-1363-001	M		NA	NA
1549	12057.s1||10_1210605_A_G	genome	control	control	10_1210605_A_G	10	1210605	A	G	399706	LINC00200	+	exon_unclassified	Simple_repeat	1	ncRNA_exonic	LINC00200	.	.	.	.	.	.	.	.	.	.	.	.	.	.	.	.	.	.	SSC	12057.s1	12057	simplex	12057.f1	12057.m1	female	.	349	356
1550	14612.p1||10_121062691_G_A	genome	NDD	autism	10_121062691_G_A	10	121062691	G	A	2869	GRK5	+	intron			intronic	GRK5	.	.	.	.	.	.	.	.	.	.	.	.	.	.	.	.	.	.	SSC	14612.p1	14612	simplex	14612.f1	14612.m1	male	41	352	360
1551	12764.s1||10_121072942_T_C	genome	control	control	10_121072942_T_C	10	121072942	T	C	2869	GRK5	+	intron	SINE	1	intronic	GRK5	.	.	.	.	.	.	.	.	.	.	.	.	.	.	.	.	.	.	SSC	12764.s1	12764	simplex	12764.f1	12764.m1	female	.	437	426
1552	12766.p1||10_121087562_T_C	genome	NDD	autism	10_121087562_T_C	10	121087562	T	C	2869	GRK5	+	intron	SINE	1	intronic	GRK5	.	.	.	.	.	.	.	.	.	.	.	.	.	.	.	.	.	.	SSC	12766.p1	12766	simplex	12766.f1	12766.m1	male	100	422	388
1553	13815.p1||10_121093655_T_C	genome	NDD	autism	10_121093655_T_C	10	121093655	T	C	2869	GRK5	+	intron			intronic	GRK5	.	.	.	.	.	.	.	.	.	.	.	.	.	.	.	.	.	.	SSC	13815.p1	13815	simplex	13815.f1	13815.m1	male	56	441	441
1554	12579.p1||10_121095495_C_T	genome	NDD	autism	10_121095495_C_T	10	121095495	C	T	2869	GRK5	+	intron	Simple_repeat	1	intronic	GRK5	.	.	.	.	.	.	.	.	.	.	.	.	.	.	.	.	.	.	SSC	12579.p1	12579	simplex	12579.f1	12579.m1	male	52	363	474
1555	12689.s1||10_121106781_G_A	genome	control	control	10_121106781_G_A	10	121106781	G	A	2869	GRK5	+	intron	Simple_repeat	1	intronic	GRK5	.	.	.	.	.	.	.	.	.	.	.	.	.	.	.	.	.	.	Turner_2017;SSC	12689.s1	;12689	;simplex	;12689.f1	;12689.m1	;female	;.	NA;412	NA;398
1556	14428.s1||10_121116890_C_T	genome	control	control	10_121116890_C_T	10	121116890	C	T	2869	GRK5	+	intron			intronic	GRK5	.	.	.	.	.	.	.	.	.	.	.	.	.	.	.	.	.	.	SSC	14428.s1	14428	simplex	14428.f1	14428.m1	female	.	372	403
1557	14175.s1||10_121120652_T_A	genome	control	control	10_121120652_T_A	10	121120652	T	A	2869	GRK5	+	intron	SINE	1	intronic	GRK5	.	.	.	.	.	.	.	.	.	.	.	.	.	.	.	.	.	.	SSC	14175.s1	14175	simplex	14175.f1	14175.m1	female	.	327	310
1558	13330.p1||10_121124101_G_A	genome	NDD	autism	10_121124101_G_A	10	121124101	G	A	2869	GRK5	+	intron			intronic	GRK5	.	.	.	.	.	.	.	.	.	.	.	.	.	.	.	.	.	.	SSC	13330.p1	13330	simplex	13330.f1	13330.m1	male	96	468	443
1559	14293.p1||10_121125409_A_G	genome	NDD	autism	10_121125409_A_G	10	121125409	A	G	2869	GRK5	+	intron			intronic	GRK5	.	.	.	.	.	.	.	.	.	.	.	.	.	.	.	.	.	.	SSC	14293.p1	14293	simplex	14293.f1	14293.m1	male	94	377	356
1560	AU4015301||10_121126108_G_A	genome	NDD	autism	10_121126108_G_A	10	121126108	G	A	2869	GRK5	+	intron			intronic	GRK5	.	.	.	.	.	.	.	.	.	.	.	.	.	.	.	.	.	.	Yuen2017	AU4015301	FAM_AU4015303	MPX	AU4015201	AU4015202	F		NA	NA
1561	12111.s1||10_121126702_C_T	genome	control	control	10_121126702_C_T	10	121126702	C	T	2869	GRK5	+	intron			intronic	GRK5	.	.	.	.	.	.	.	.	.	.	.	.	.	.	.	.	.	.	SSC	12111.s1	12111	simplex	12111.f1	12111.m1	female	.	349	315
1562	14224.p1||10_121126713_C_T	genome	NDD	autism	10_121126713_C_T	10	121126713	C	T	2869	GRK5	+	intron			intronic	GRK5	.	.	.	.	.	.	.	.	.	.	.	.	.	.	.	.	.	.	SSC	14224.p1	14224	simplex	14224.f1	14224.m1	male	129	448	420
1563	1-0092-003||10_121153581_C_G	genome	NDD	autism	10_121153581_C_G	10	121153581	C	G	2869	GRK5	+	intron	Simple_repeat	1	intronic	GRK5	.	.	.	.	.	.	.	.	.	.	.	.	.	.	.	.	.	.	Yuen2017	1-0092-003	FAM_1-0092-005	MPX	1-0092-002	1-0092-001	M		NA	NA
1564	13264.p1||10_121164981_G_T	genome	NDD	autism	10_121164981_G_T	10	121164981	G	T	2869	GRK5	+	intron			intronic	GRK5	.	.	.	.	.	.	.	.	.	.	.	.	.	.	.	.	.	.	SSC	13264.p1	13264	simplex	13264.f1	13264.m1	male	102	408	377
1565	1-0973-003||10_121167407_G_A	genome	NDD	autism	10_121167407_G_A	10	121167407	G	A	2869	GRK5	+	intron	SINE	1	intronic	GRK5	.	.	.	.	.	.	.	.	.	.	.	.	.	.	.	.	.	.	Yuen2017	1-0973-003	FAM_1-0973-003	SPX	1-0973-002	1-0973-001	M		NA	NA
1566	14172.s1||10_121179305_G_A	genome	control	control	10_121179305_G_A	10	121179305	G	A	2869	GRK5	+	intron			intronic	GRK5	.	.	.	.	.	.	.	.	.	.	.	.	.	.	.	.	.	.	SSC	14172.s1	14172	simplex	14172.f1	14172.m1	female	.	437	329
1567	12573.s1||10_12126082_C_T	genome	control	control	10_12126082_C_T	10	12126082	C	T	55526	DHTKD1	+	intron	SINE	1	intronic	DHTKD1	.	.	.	.	.	.	.	.	.	.	.	.	.	.	.	.	.	.	Turner_2017	12573.s1							NA	NA
1568	13341.p1||10_121266280_T_C	genome	NDD	autism	10_121266280_T_C	10	121266280	T	C	6001	RGS10	-	intron	SINE	1	intronic	RGS10	.	.	.	.	.	.	.	.	.	.	.	.	.	.	.	.	.	.	SSC	13341.p1	13341	simplex	13341.f1	13341.m1	male	50	431	418
1569	13341.p1||10_121266282_A_C	genome	NDD	autism	10_121266282_A_C	10	121266282	A	C	6001	RGS10	-	intron	SINE	1	intronic	RGS10	.	.	.	.	.	.	.	.	.	.	.	.	.	.	.	.	.	.	SSC	13341.p1	13341	simplex	13341.f1	13341.m1	male	50	431	418
1570	11552.s1||10_121266801_G_T	genome	control	control	10_121266801_G_T	10	121266801	G	T	6001	RGS10	-	intron			intronic	RGS10	.	.	.	.	.	.	.	.	.	.	.	.	.	.	.	.	.	.	SSC	11552.s1	11552	simplex	11552.f1	11552.m1	female	.	460	509
1571	7-0183-003||10_121267761_C_T	genome	NDD	autism	10_121267761_C_T	10	121267761	C	T	6001	RGS10	-	intron	SINE	1	intronic	RGS10	.	.	.	.	.	.	.	.	.	.	.	.	.	.	.	.	.	.	Yuen2017	7-0183-003	FAM_7-0183-003	SPX	7-0183-002	7-0183-001	M		NA	NA
1572	2-1361-003||10_121300924_A_G	genome	NDD	autism	10_121300924_A_G	10	121300924	A	G	6001	RGS10	-	intron			intronic	RGS10	.	.	.	.	.	.	.	.	.	.	.	.	.	.	.	.	.	.	Yuen2016	2-1361-003	FAM_2-1361-003	SPX	2-1361-002	2-1361-001	F		NA	NA
1573	14361.p1||10_121334856_T_C	genome	NDD	autism	10_121334856_T_C	10	121334856	T	C	7073	TIAL1	-	3'UTR			UTR3	TIAL1	NM_001033925:c.*321A>G;NM_003252:c.*321A>G;NM_001323967:c.*321A>G;NM_001323965:c.*321A>G;NM_001323970:c.*321A>G;NM_001323968:c.*321A>G;NM_001323969:c.*321A>G;NM_001323964:c.*321A>G	.	.	.	.	.	.	.	.	.	.	.	.	.	.	.	.	.	SSC	14361.p1	14361	simplex	14361.f1	14361.m1	male	98	356	357
1574	12090.p1||10_121336635_T_C	genome	NDD	autism	10_121336635_T_C	10	121336635	T	C	7073	TIAL1	-	CDS			exonic	TIAL1	.	nonsynonymous SNV	TIAL1:NM_001033925:exon10:c.A869G:p.Y290C,TIAL1:NM_003252:exon10:c.A818G:p.Y273C,TIAL1:NM_001323964:exon11:c.A449G:p.Y150C,TIAL1:NM_001323965:exon11:c.A449G:p.Y150C,TIAL1:NM_001323967:exon11:c.A449G:p.Y150C,TIAL1:NM_001323968:exon11:c.A752G:p.Y251C,TIAL1:NM_001323969:exon11:c.A701G:p.Y234C,TIAL1:NM_001323970:exon11:c.A752G:p.Y251C	D	D	P	D	D	L	T	D	T	T	T	D	24.9	1.011	1	SSC	12090.p1	12090	simplex	12090.f1	12090.m1	female	85	354	361
1575	AU0786305||10_12138918_G_A	genome	NDD	autism	10_12138918_G_A	10	12138918	G	A	55526	DHTKD1	+	intron			intronic	DHTKD1	.	.	.	.	.	.	.	.	.	.	.	.	.	.	.	.	.	.	Yuen2017	AU0786305	FAM_AU0786305	MPX	AU0786201	AU0786202	F		NA	NA
1576	22024.s1||10_121411511_C_T	genome	control	control	10_121411511_C_T	10	121411511	C	T	9531	BAG3	+	intron			intronic	BAG3	.	.	.	.	.	.	.	.	.	.	.	.	.	.	.	.	.	.	SSC	22024.s1	KOR-024	simplex	KOR-024.f1	KOR-024.m1	female		408	415
1577	14188.p1||10_121418077_T_A	genome	NDD	autism	10_121418077_T_A	10	121418077	T	A	9531	BAG3	+	intron			intronic	BAG3	.	.	.	.	.	.	.	.	.	.	.	.	.	.	.	.	.	.	SSC	14188.p1	14188	simplex	14188.f1	14188.m1	male	66	379	384
1578	13546.s1||10_121418858_G_T	genome	control	control	10_121418858_G_T	10	121418858	G	T	9531	BAG3	+	intron			intronic	BAG3	.	.	.	.	.	.	.	.	.	.	.	.	.	.	.	.	.	.	Turner_2017;SSC	13546.s1	;13546	;simplex	;13546.f1	;13546.m1	;female	;.	NA;442	NA;316
1579	12469.s1||10_121428604_G_T	genome	control	control	10_121428604_G_T	10	121428604	G	T	9531	BAG3	+	intron	LTR	1	intronic	BAG3	.	.	.	.	.	.	.	.	.	.	.	.	.	.	.	.	.	.	SSC	12469.s1	12469	simplex	12469.f1	12469.m1	female	.	386	378
1580	12469.s1||10_121429632_G_A	genome	control	control	10_121429632_G_A	10	121429632	G	A	9531	BAG3	+	CDS			exonic	BAG3	.	synonymous SNV	BAG3:NM_004281:exon2:c.G450A:p.Q150Q	.	.	.	.	.	.	.	.	.	.	.	.	.	.	.	SSC	12469.s1	12469	simplex	12469.f1	12469.m1	female	.	386	378
1581	1-0512-003||10_121430491_G_A	genome	NDD	autism	10_121430491_G_A	10	121430491	G	A	9531	BAG3	+	intron			intronic	BAG3	.	.	.	.	.	.	.	.	.	.	.	.	.	.	.	.	.	.	Yuen2017	1-0512-003	FAM_1-0512-003	SPX	1-0512-002	1-0512-001	M		NA	NA
1582	AU3765303||10_121434172_T_C	genome	NDD	autism	10_121434172_T_C	10	121434172	T	C	9531	BAG3	+	intron			intronic	BAG3	.	.	.	.	.	.	.	.	.	.	.	.	.	.	.	.	.	.	Yuen2017	AU3765303	FAM_AU3765303	MPX	AU3765201	AU3765202	M		NA	NA
1583	14349.p1||10_121486910_C_T	genome	NDD	autism	10_121486910_C_T	10	121486910	C	T	22876	INPP5F	+	intron			intronic	INPP5F	.	.	.	.	.	.	.	.	.	.	.	.	.	.	.	.	.	.	SSC	14349.p1	14349	simplex	14349.f1	14349.m1	female	109	423	311
1584	13133.p1||10_121495510_C_T	genome	NDD	autism	10_121495510_C_T	10	121495510	C	T	22876	INPP5F	+	intron	SINE	1	intronic	INPP5F	.	.	.	.	.	.	.	.	.	.	.	.	.	.	.	.	.	.	SSC	13133.p1	13133	simplex	13133.f1	13133.m1	male	91	513	450
1585	14395.p1||10_12150189_A_G	genome	NDD	autism	10_12150189_A_G	10	12150189	A	G	55526	DHTKD1	+	intron			intronic	DHTKD1	.	.	.	.	.	.	.	.	.	.	.	.	.	.	.	.	.	.	SSC	14395.p1	14395	simplex	14395.f1	14395.m1	female	104	484	490
1586	14179.p1||10_121503660_C_G	genome	NDD	autism	10_121503660_C_G	10	121503660	C	G	22876	INPP5F	+	intron	DNA	1	intronic	INPP5F	.	.	.	.	.	.	.	.	.	.	.	.	.	.	.	.	.	.	SSC	14179.p1	14179	simplex	14179.f1	14179.m1	male	88	432	432
1587	2-1174-006||10_12151009_T_C	genome	NDD	autism	10_12151009_T_C	10	12151009	T	C	55526	DHTKD1	+	intron	SINE	1	intronic	DHTKD1	.	.	.	.	.	.	.	.	.	.	.	.	.	.	.	.	.	.	Yuen2017	2-1174-006	FAM_2-1174-006	MPX	2-1174-002	2-1174-001	M		NA	NA
1588	12588.s1||10_12151833_T_C	genome	control	control	10_12151833_T_C	10	12151833	T	C	55526	DHTKD1	+	intron	LINE	1	intronic	DHTKD1	.	.	.	.	.	.	.	.	.	.	.	.	.	.	.	.	.	.	SSC	12588.s1	12588	simplex	12588.f1	12588.m1	male	.	495	410
1589	14485.p1||10_121533930_A_G	genome	NDD	autism	10_121533930_A_G	10	121533930	A	G	22876	INPP5F	+	intron	LINE	1	intronic	INPP5F	.	.	.	.	.	.	.	.	.	.	.	.	.	.	.	.	.	.	SSC	14485.p1	14485	simplex	14485.f1	14485.m1	male	102	434	415
1590	11496.s1||10_121550579_C_T	genome	control	control	10_121550579_C_T	10	121550579	C	T	22876	INPP5F	+	intron			intronic	INPP5F	.	.	.	.	.	.	.	.	.	.	.	.	.	.	.	.	.	.	SSC	11496.s1	11496	simplex	11496.f1	11496.m1	male	.	487	486
1591	gonl-49c||10_121559098_A_C	genome	control	control	10_121559098_A_C	10	121559098	A	C	22876	INPP5F	+	intron			intronic	INPP5F	.	.	.	.	.	.	.	.	.	.	.	.	.	.	.	.	.	.	GONL	gonl-49c							NA	NA
1592	AU4479301||10_121564063_C_T	genome	NDD	autism	10_121564063_C_T	10	121564063	C	T	22876	INPP5F	+	intron			intronic	INPP5F	.	.	.	.	.	.	.	.	.	.	.	.	.	.	.	.	.	.	Yuen2017	AU4479301	FAM_AU4479301	SPX	AU4479201	AU4479202	M		NA	NA
1593	11327.p1||10_12156435_A_G	genome	NDD	autism	10_12156435_A_G	10	12156435	A	G	55526	DHTKD1	+	intron	SINE	1	intronic	DHTKD1	.	.	.	.	.	.	.	.	.	.	.	.	.	.	.	.	.	.	SSC	11327.p1	11327	simplex	11327.f1	11327.m1	male	86	394	393
1594	2-1290-004||10_12157191_G_A	genome	NDD	autism	10_12157191_G_A	10	12157191	G	A	55526	DHTKD1	+	intron	SINE	1	intronic	DHTKD1	.	.	.	.	.	.	.	.	.	.	.	.	.	.	.	.	.	.	Yuen2017	2-1290-004	FAM_2-1290-004	MPX	2-1290-002	2-1290-001	M		NA	NA
1595	12507.p1||10_121587688_G_A	genome	NDD	autism	10_121587688_G_A	10	121587688	G	A	22876	INPP5F	+	3'UTR			UTR3	INPP5F	NM_014937:c.*396G>A;NM_001243194:c.*396G>A	.	.	.	.	.	.	.	.	.	.	.	.	.	.	.	.	.	SSC	12507.p1	12507	simplex	12507.f1	12507.m1	male	73	443	430
1596	13964.p1||10_121588215_T_C	genome	NDD	autism	10_121588215_T_C	10	121588215	T	C	22876	INPP5F	+	3'UTR	SINE	1	UTR3	INPP5F	NM_014937:c.*923T>C;NM_001243194:c.*923T>C	.	.	.	.	.	.	.	.	.	.	.	.	.	.	.	.	.	Turner_2017;SSC	13964.p1	;13964	;simplex	;13964.f1	;13964.m1	;male	;73	NA;525	NA;396
1597	14514.s1||10_121594727_C_A	genome	control	control	10_121594727_C_A	10	121594727	C	A	79892	MCMBP	-	intron	LINE	1	intronic	MCMBP	.	.	.	.	.	.	.	.	.	.	.	.	.	.	.	.	.	.	SSC	14514.s1	14514	simplex	14514.f1	14514.m1	male	.	287	309
1598	13398.s1||10_121597289_C_T	genome	control	control	10_121597289_C_T	10	121597289	C	T	79892	MCMBP	-	intron	SINE	1	intronic	MCMBP	.	.	.	.	.	.	.	.	.	.	.	.	.	.	.	.	.	.	SSC	13398.s1	13398	simplex	13398.f1	13398.m1	female	.	322	289
1599	11411.s1||10_12160420_C_T	genome	control	control	10_12160420_C_T	10	12160420	C	T	55526	DHTKD1	+	intron	SINE	1	intronic	DHTKD1	.	.	.	.	.	.	.	.	.	.	.	.	.	.	.	.	.	.	Turner_2017;SSC	11411.s1	;11411	;simplex	;11411.f1	;11411.m1	;female	;.	NA;345	NA;322
1600	11339.p1||10_121606811_A_G	genome	NDD	autism	10_121606811_A_G	10	121606811	A	G	79892	MCMBP	-	intron	LINE	1	intronic	MCMBP	.	.	.	.	.	.	.	.	.	.	.	.	.	.	.	.	.	.	SSC	11339.p1	11339	simplex	11339.f1	11339.m1	female	62	380	425
1601	14610.s1||10_121610077_C_T	genome	control	control	10_121610077_C_T	10	121610077	C	T	79892	MCMBP	-	intron	SINE	1	intronic	MCMBP	.	.	.	.	.	.	.	.	.	.	.	.	.	.	.	.	.	.	SSC	14610.s1	14610	simplex	14610.f1	14610.m1	male	.	373	371
1602	1-0126-003||10_121610698_C_T	genome	NDD	autism	10_121610698_C_T	10	121610698	C	T	79892	MCMBP	-	intron	LINE	1	intronic	MCMBP	.	.	.	.	.	.	.	.	.	.	.	.	.	.	.	.	.	.	Yuen2017	1-0126-003	FAM_1-0126-004	MPX	1-0126-002	1-0126-001	M		NA	NA
1603	13820.p1||10_121688886_C_T	genome	NDD	autism	10_121688886_C_T	10	121688886	C	T	11196	SEC23IP	+	intron	SINE	1	intronic	SEC23IP	.	.	.	.	.	.	.	.	.	.	.	.	.	.	.	.	.	.	SSC	13820.p1	13820	simplex	13820.f1	13820.m1	male	117	425	403
1604	11664.p1||10_121695294_A_T	genome	NDD	autism	10_121695294_A_T	10	121695294	A	T	11196	SEC23IP	+	intron	LINE	1	intronic	SEC23IP	.	.	.	.	.	.	.	.	.	.	.	.	.	.	.	.	.	.	SSC	11664.p1	11664	simplex	11664.f1	11664.m1	male	44	426	400
1605	14016.s1||10_12183666_G_A	genome	control	control	10_12183666_G_A	10	12183666	G	A	55176	SEC61A2	+	intron	LINE	1	intronic	SEC61A2	.	.	.	.	.	.	.	.	.	.	.	.	.	.	.	.	.	.	SSC	14016.s1	14016	simplex	14016.f1	14016.m1	female	.	255	240
1606	13584.s1||10_12187830_T_C	genome	control	control	10_12187830_T_C	10	12187830	T	C	55176	SEC61A2	+	intron			intronic	SEC61A2	.	.	.	.	.	.	.	.	.	.	.	.	.	.	.	.	.	.	SSC	13584.s1	13584	simplex	13584.f1	13584.m1	female	.	334	433
1607	12568.s1||10_12218540_C_T	genome	control	control	10_12218540_C_T	10	12218540	C	T	11164	NUDT5	-	intron	SINE	1	intronic	NUDT5	.	.	.	.	.	.	.	.	.	.	.	.	.	.	.	.	.	.	Turner2016	12568.s1							NA	NA
1608	12568.s1||10_12218558_G_C	genome	control	control	10_12218558_G_C	10	12218558	G	C	11164	NUDT5	-	intron	SINE	1	intronic	NUDT5	.	.	.	.	.	.	.	.	.	.	.	.	.	.	.	.	.	.	Turner2016	12568.s1							NA	NA
1609	12568.s1||10_12218564_C_T	genome	control	control	10_12218564_C_T	10	12218564	C	T	11164	NUDT5	-	intron	SINE	1	intronic	NUDT5	.	.	.	.	.	.	.	.	.	.	.	.	.	.	.	.	.	.	Turner2016	12568.s1							NA	NA
1610	13163.s1||10_12221800_T_C	genome	control	control	10_12221800_T_C	10	12221800	T	C	11164	NUDT5	-	intron			intronic	NUDT5	.	.	.	.	.	.	.	.	.	.	.	.	.	.	.	.	.	.	SSC	13163.s1	13163	simplex	13163.f1	13163.m1	male	.	643	440
1611	1-0279-004||10_122219806_C_G	genome	NDD	autism	10_122219806_C_G	10	122219806	C	G	196051	PPAPDC1A	+	intron			intronic	PLPP4	.	.	.	.	.	.	.	.	.	.	.	.	.	.	.	.	.	.	Yuen2017	1-0279-004	FAM_1-0279-004	MPX	1-0279-002	1-0279-001	M		NA	NA
1612	11324.s1||10_122237598_G_A	genome	control	control	10_122237598_G_A	10	122237598	G	A	196051	PPAPDC1A	+	intron			intronic	PLPP4	.	.	.	.	.	.	.	.	.	.	.	.	.	.	.	.	.	.	SSC	11324.s1	11324	simplex	11324.f1	11324.m1	male	.	456	420
1613	12078.p1||10_12223876_G_A	genome	NDD	autism	10_12223876_G_A	10	12223876	G	A	11164	NUDT5	-	intron	SINE	1	intronic	NUDT5	.	.	.	.	.	.	.	.	.	.	.	.	.	.	.	.	.	.	Turner_2017;SSC	12078.p1	;12078	;simplex	;12078.f1	;12078.m1	;male	;102	NA;236	NA;249
1614	12574.p1||10_122243931_G_A	genome	NDD	autism	10_122243931_G_A	10	122243931	G	A	196051	PPAPDC1A	+	intron	LTR	1	intronic	PLPP4	.	.	.	.	.	.	.	.	.	.	.	.	.	.	.	.	.	.	Turner_2017;SSC	12574.p1	;12574	;simplex	;12574.f1	;12574.m1	;male	;91	NA;322	NA;319
1615	2-1302-003||10_122253216_C_T	genome	NDD	autism	10_122253216_C_T	10	122253216	C	T	196051	PPAPDC1A	+	intron			intronic	PLPP4	.	.	.	.	.	.	.	.	.	.	.	.	.	.	.	.	.	.	Yuen2017	2-1302-003	FAM_2-1302-003	SPX	2-1302-002	2-1302-001	F		NA	NA
1616	12518.p1||10_122261879_G_A	genome	NDD	autism	10_122261879_G_A	10	122261879	G	A	196051	PPAPDC1A	+	intron	Low_complexity	1	intronic	PLPP4	.	.	.	.	.	.	.	.	.	.	.	.	.	.	.	.	.	.	Turner_2017;SSC	12518.p1	;12518	;simplex	;12518.f1	;12518.m1	;male	;95	NA;408	NA;317
1617	14415.p1||10_122263818_C_T	genome	NDD	autism	10_122263818_C_T	10	122263818	C	T	196051	PPAPDC1A	+	intron	LTR	1	intronic	PLPP4	.	.	.	.	.	.	.	.	.	.	.	.	.	.	.	.	.	.	Turner_2017;SSC	14415.p1	;14415	;simplex	;14415.f1	;14415.m1	;male	;114	NA;427	NA;407
1618	AU3765303||10_122283160_T_A	genome	NDD	autism	10_122283160_T_A	10	122283160	T	A	196051	PPAPDC1A	+	intron	Low_complexity	1	intronic	PLPP4	.	.	.	.	.	.	.	.	.	.	.	.	.	.	.	.	.	.	Yuen2017	AU3765303	FAM_AU3765303	MPX	AU3765201	AU3765202	M		NA	NA
1619	14660.p1||10_12229141_C_T	genome	NDD	autism	10_12229141_C_T	10	12229141	C	T	11164	NUDT5	-	intron	SINE	1	intronic	NUDT5	.	.	.	.	.	.	.	.	.	.	.	.	.	.	.	.	.	.	SSC	14660.p1	14660	simplex	14660.f1	14660.m1	female	76	467	430
1620	1-0606-003||10_122293531_A_G	genome	NDD	autism	10_122293531_A_G	10	122293531	A	G	196051	PPAPDC1A	+	intron	LINE	1	intronic	PLPP4	.	.	.	.	.	.	.	.	.	.	.	.	.	.	.	.	.	.	Yuen2017	1-0606-003	FAM_1-0606-003	SPX	1-0606-002	1-0606-001	M		NA	NA
1621	13881.s1||10_122303909_A_G	genome	control	control	10_122303909_A_G	10	122303909	A	G	196051	PPAPDC1A	+	intron			intronic	PLPP4	.	.	.	.	.	.	.	.	.	.	.	.	.	.	.	.	.	.	SSC	13881.s1	13881	simplex	13881.f1	13881.m1	female	.	561	449
1622	14150.p1||10_122305037_C_T	genome	NDD	autism	10_122305037_C_T	10	122305037	C	T	196051	PPAPDC1A	+	intron			intronic	PLPP4	.	.	.	.	.	.	.	.	.	.	.	.	.	.	.	.	.	.	Turner_2017;SSC	14150.p1	;14150	;simplex	;14150.f1	;14150.m1	;male	;96	NA;392	NA;318
1623	14260.p1||10_12231072_T_C	genome	NDD	autism	10_12231072_T_C	10	12231072	T	C	11164	NUDT5	-	intron			intronic	NUDT5	.	.	.	.	.	.	.	.	.	.	.	.	.	.	.	.	.	.	Turner_2017;SSC	14260.p1	;14260	;simplex	;14260.f1	;14260.m1	;male	;97	NA;494	NA;463
1624	13714.s1||10_122323288_C_T	genome	control	control	10_122323288_C_T	10	122323288	C	T	196051	PPAPDC1A	+	intron	SINE	1	intronic	PLPP4	.	.	.	.	.	.	.	.	.	.	.	.	.	.	.	.	.	.	Turner_2017	13714.s1							NA	NA
1625	14637.s1||10_122326628_C_T	genome	control	control	10_122326628_C_T	10	122326628	C	T	196051	PPAPDC1A	+	intron			intronic	PLPP4	.	.	.	.	.	.	.	.	.	.	.	.	.	.	.	.	.	.	Turner_2017;SSC	14637.s1	;14637	;simplex	;14637.f1	;14637.m1	;female	;.	NA;450	NA;427
1626	12237.s1||10_122330335_G_A	genome	control	control	10_122330335_G_A	10	122330335	G	A	196051	PPAPDC1A	+	intron			intronic	PLPP4	.	.	.	.	.	.	.	.	.	.	.	.	.	.	.	.	.	.	SSC	12237.s1	12237	simplex	12237.f1	12237.m1	female	.	396	423
1627	11071.s1||10_122332708_A_G	genome	control	control	10_122332708_A_G	10	122332708	A	G	196051	PPAPDC1A	+	intron			intronic	PLPP4	.	.	.	.	.	.	.	.	.	.	.	.	.	.	.	.	.	.	SSC	11071.s1	11071	simplex	11071.f1	11071.m1	female	.	351	359
1628	5-0099-003||10_12243564_T_C	genome	NDD	autism	10_12243564_T_C	10	12243564	T	C	8872	CDC123	+	intron	LINE	1	intronic	CDC123	.	.	.	.	.	.	.	.	.	.	.	.	.	.	.	.	.	.	Yuen2017	5-0099-003	FAM_5-0099-003	SPX	5-0099-002	5-0099-001	F		NA	NA
1629	AU3811301||10_122525338_C_T	genome	NDD	autism	10_122525338_C_T	10	122525338	C	T	283089	LOC283089	-	intron			ncRNA_intronic	WDR11-AS1	.	.	.	.	.	.	.	.	.	.	.	.	.	.	.	.	.	.	Yuen2017	AU3811301	FAM_AU3811305	MPX	AU3811201	AU3811202	M		NA	NA
1630	gonl-147c||10_122532716_G_A	genome	control	control	10_122532716_G_A	10	122532716	G	A	283089	LOC283089	-	intron	LTR	1	ncRNA_intronic	WDR11-AS1	.	.	.	.	.	.	.	.	.	.	.	.	.	.	.	.	.	.	GONL	gonl-147c							NA	NA
1631	11218.s1||10_122535833_C_T	genome	control	control	10_122535833_C_T	10	122535833	C	T	283089	LOC283089	-	intron			ncRNA_intronic	WDR11-AS1	.	.	.	.	.	.	.	.	.	.	.	.	.	.	.	.	.	.	Turner_2017	11218.s1							NA	NA
1632	13867.s2||10_122539643_T_C	genome	control	control	10_122539643_T_C	10	122539643	T	C	283089	LOC283089	-	intron			ncRNA_intronic	WDR11-AS1	.	.	.	.	.	.	.	.	.	.	.	.	.	.	.	.	.	.	SSC	13867.s2	13867	simplex	13867.f1	13867.m1	male	.	404	333
1633	13812.p1||10_122542965_C_T	genome	NDD	autism	10_122542965_C_T	10	122542965	C	T	283089	LOC283089	-	intron			ncRNA_intronic	WDR11-AS1	.	.	.	.	.	.	.	.	.	.	.	.	.	.	.	.	.	.	Turner_2017;SSC	13812.p1	;13812	;simplex	;13812.f1	;13812.m1	;male	;36	NA;472	NA;409
1634	13523.s1||10_122558116_A_G	genome	control	control	10_122558116_A_G	10	122558116	A	G	283089	LOC283089	-	intron	Other	1	ncRNA_intronic	WDR11-AS1	.	.	.	.	.	.	.	.	.	.	.	.	.	.	.	.	.	.	Turner_2017	13523.s1							NA	NA
1635	11496.s1||10_122565369_A_G	genome	control	control	10_122565369_A_G	10	122565369	A	G	283089	LOC283089	-	intron			ncRNA_intronic	WDR11-AS1	.	.	.	.	.	.	.	.	.	.	.	.	.	.	.	.	.	.	SSC	11496.s1	11496	simplex	11496.f1	11496.m1	male	.	487	486
1636	13668.p1||10_122571438_T_G	genome	NDD	autism	10_122571438_T_G	10	122571438	T	G	283089	LOC283089	-	intron	LTR	1	ncRNA_intronic	WDR11-AS1	.	.	.	.	.	.	.	.	.	.	.	.	.	.	.	.	.	.	Turner_2017;SSC	13668.p1	;13668	;simplex	;13668.f1	;13668.m1	;male	;49	NA;393	NA;415
1637	13396.s1||10_12257793_G_A	genome	control	control	10_12257793_G_A	10	12257793	G	A	8872	CDC123	+	CDS			exonic	CDC123	.	nonsynonymous SNV	CDC123:NM_006023:exon5:c.G292A:p.G98R	D	D	D	D	D	M	.	D	D	D	D	D	29	0.953	1	SSC	13396.s1	13396	simplex	13396.f1	13396.m1	female	.	409	390
1638	13237.p1||10_122584363_A_G	genome	NDD	autism	10_122584363_A_G	10	122584363	A	G	283089	LOC283089	-	intron			ncRNA_intronic	WDR11-AS1	.	.	.	.	.	.	.	.	.	.	.	.	.	.	.	.	.	.	Turner_2017;SSC	13237.p1	;13237	;simplex	;13237.f1	;13237.m1	;male	;93	NA;437	NA;420
1639	11208.p1||10_122597227_G_C	genome	NDD	autism	10_122597227_G_C	10	122597227	G	C	283089	LOC283089	-	intron	LTR	1	ncRNA_intronic	WDR11-AS1	.	.	.	.	.	.	.	.	.	.	.	.	.	.	.	.	.	.	SSC	11208.p1	11208	simplex	11208.f1	11208.m1	female	128	488	283
1640	13831.s1||10_122606055_C_G	genome	control	control	10_122606055_C_G	10	122606055	C	G	283089	LOC283089	-	intron	LTR	1	ncRNA_intronic	WDR11-AS1	.	.	.	.	.	.	.	.	.	.	.	.	.	.	.	.	.	.	Turner_2017	13831.s1							NA	NA
1641	2-1508-004||10_122629881_G_A	genome	NDD	autism	10_122629881_G_A	10	122629881	G	A	100847064	MIR5694	+	intron			intronic	WDR11	.	.	.	.	.	.	.	.	.	.	.	.	.	.	.	.	.	.	Yuen2017	2-1508-004	FAM_2-1508-006	MPX	2-1508-006	2-1508-001	F		NA	NA
1642	11341.p1||10_122634030_T_C	genome	NDD	autism	10_122634030_T_C	10	122634030	T	C	55717	WDR11	+	intron	LINE	1	intronic	WDR11	.	.	.	.	.	.	.	.	.	.	.	.	.	.	.	.	.	.	Turner2016	11341.p1							NA	NA
1643	03C16813|03C16814||10_122636302_A_G	genome	NDD	autism	10_122636302_A_G	10	122636302	A	G	100847064	MIR5694	+	intron	SINE	1	intronic	WDR11	.	.	.	.	.	.	.	.	.	.	.	.	.	.	.	.	.	.	Michaelson2012	03C16813|03C16814							NA	NA
1644	12548.p1||10_122637794_T_C	genome	NDD	autism	10_122637794_T_C	10	122637794	T	C	55717	WDR11	+	intron			intronic	WDR11	.	.	.	.	.	.	.	.	.	.	.	.	.	.	.	.	.	.	SSC	12548.p1	12548	simplex	12548.f1	12548.m1	male	113	379	386
1645	11610.p1||10_122640606_T_G	genome	NDD	autism	10_122640606_T_G	10	122640606	T	G	55717	WDR11	+	intron			intronic	WDR11	.	.	.	.	.	.	.	.	.	.	.	.	.	.	.	.	.	.	SSC	11610.p1	11610	simplex	11610.f1	11610.m1	male	138	380	341
1646	12803.p1||10_12265844_T_C	genome	NDD	autism	10_12265844_T_C	10	12265844	T	C	8872	CDC123	+	intron			intronic	CDC123	.	.	.	.	.	.	.	.	.	.	.	.	.	.	.	.	.	.	SSC	12803.p1	12803	simplex	12803.f1	12803.m1	male	96	430	480
1647	13129.p1||10_122659792_C_T	genome	NDD	autism	10_122659792_C_T	10	122659792	C	T	55717	WDR11	+	intron			intronic	WDR11	.	.	.	.	.	.	.	.	.	.	.	.	.	.	.	.	.	.	Turner_2017;SSC	13129.p1	;13129	;simplex	;13129.f1	;13129.m1	;male	;33	NA;436	NA;432
1648	1-0972-003||10_122662209_G_A	genome	NDD	autism	10_122662209_G_A	10	122662209	G	A	100847064	MIR5694	+	intron			intronic	WDR11	.	.	.	.	.	.	.	.	.	.	.	.	.	.	.	.	.	.	Yuen2017	1-0972-003	FAM_1-0972-001	SPX	1-0972-002	1-0972-001	F		NA	NA
1649	13043.p1||10_122665762_C_G	genome	NDD	autism	10_122665762_C_G	10	122665762	C	G	55717	WDR11	+	3'UTR			intronic	WDR11	.	.	.	.	.	.	.	.	.	.	.	.	.	.	.	.	.	.	SSC	13043.p1	13043	simplex	13043.f1	13043.m1	male	127	475	480
1650	13696.p1||10_12269533_A_G	genome	NDD	autism	10_12269533_A_G	10	12269533	A	G	8872	CDC123	+	intron	SINE	1	intronic	CDC123	.	.	.	.	.	.	.	.	.	.	.	.	.	.	.	.	.	.	Turner2016	13696.p1							NA	NA
1651	14496.p1||10_12274951_G_A	genome	NDD	autism	10_12274951_G_A	10	12274951	G	A	8872	CDC123	+	intron	SINE	1	intronic	CDC123	.	.	.	.	.	.	.	.	.	.	.	.	.	.	.	.	.	.	Turner2016	14496.p1							NA	NA
1652	13304.p1||10_12275694_C_T	genome	NDD	autism	10_12275694_C_T	10	12275694	C	T	8872	CDC123	+	intron			intronic	CDC123	.	.	.	.	.	.	.	.	.	.	.	.	.	.	.	.	.	.	Turner_2017;SSC	13304.p1	;13304	;simplex	;13304.f1	;13304.m1	;male	;61	NA;405	NA;332
1653	5-0046-003||10_12277222_G_A	genome	NDD	autism	10_12277222_G_A	10	12277222	G	A	8872	CDC123	+	intron	DNA	1	intronic	CDC123	.	.	.	.	.	.	.	.	.	.	.	.	.	.	.	.	.	.	Yuen2017	5-0046-003	FAM_5-0046-003	SPX	5-0046-002	5-0046-001	M		NA	NA
1654	13290.p1||10_1228351_G_A	genome	NDD	autism	10_1228351_G_A	10	1228351	G	A	105	ADARB2	-	3'UTR			UTR3	ADARB2	NM_018702:c.*782C>T	.	.	.	.	.	.	.	.	.	.	.	.	.	.	.	.	.	Turner_2017	13290.p1							NA	NA
1655	AU3888302||10_12290983_G_A	genome	NDD	autism	10_12290983_G_A	10	12290983	G	A	8872	CDC123	+	intron	SINE	1	intronic	CDC123	.	.	.	.	.	.	.	.	.	.	.	.	.	.	.	.	.	.	Yuen2017	AU3888302	FAM_AU3888302	SPX	AU3888201	AU3888202	M		NA	NA
1656	14044.s1||10_1230961_G_T	genome	control	control	10_1230961_G_T	10	1230961	G	T	105	ADARB2	-	CDS||5'UTR			exonic	ADARB2	.	nonsynonymous SNV	ADARB2:NM_018702:exon9:c.C1883A:p.A628E	T	B	B	N	N	M	D	D	D	D	D	N	16.88	-0.251	0	SSC	14044.s1	14044	simplex	14044.f1	14044.m1	female	.	497	439
1657	11312.s1||10_123261658_C_T	genome	control	control	10_123261658_C_T	10	123261658	C	T	2263	FGFR2	-	intron			intronic	FGFR2	.	.	.	.	.	.	.	.	.	.	.	.	.	.	.	.	.	.	SSC	11312.s1	11312	simplex	11312.f1	11312.m1	male	.	359	393
1658	13843.s1||10_123263506_G_C	genome	control	control	10_123263506_G_C	10	123263506	G	C	2263	FGFR2	-	intron			intronic	FGFR2	.	.	.	.	.	.	.	.	.	.	.	.	.	.	.	.	.	.	SSC	13843.s1	13843	simplex	13843.f1	13843.m1	female	.	357	438
1659	14047.p1||10_123265908_C_T	genome	NDD	autism	10_123265908_C_T	10	123265908	C	T	2263	FGFR2	-	intron			intronic	FGFR2	.	.	.	.	.	.	.	.	.	.	.	.	.	.	.	.	.	.	SSC	14047.p1	14047	simplex	14047.f1	14047.m1	male	94	427	428
1660	11455.p1||10_123265989_C_A	genome	NDD	autism	10_123265989_C_A	10	123265989	C	A	2263	FGFR2	-	intron			intronic	FGFR2	.	.	.	.	.	.	.	.	.	.	.	.	.	.	.	.	.	.	SSC	11455.p1	11455	simplex	11455.f1	11455.m1	male	73	446	430
1661	14514.p1||10_123309028_G_A	genome	NDD	autism	10_123309028_G_A	10	123309028	G	A	2263	FGFR2	-	intron	LTR	1	intronic	FGFR2	.	.	.	.	.	.	.	.	.	.	.	.	.	.	.	.	.	.	SSC	14514.p1	14514	simplex	14514.f1	14514.m1	male	105	302	324
1662	11397.s1||10_123332695_C_G	genome	control	control	10_123332695_C_G	10	123332695	C	G	2263	FGFR2	-	intron			intronic	FGFR2	.	.	.	.	.	.	.	.	.	.	.	.	.	.	.	.	.	.	SSC	11397.s1	11397	simplex	11397.f1	11397.m1	female	.	454	325
1663	12473.s1||10_123334292_G_A	genome	control	control	10_123334292_G_A	10	123334292	G	A	2263	FGFR2	-	intron			intronic	FGFR2	.	.	.	.	.	.	.	.	.	.	.	.	.	.	.	.	.	.	SSC	12473.s1	12473	simplex	12473.f1	12473.m1	female	.	331	281
1664	11029.s1||10_123351670_C_T	genome	control	control	10_123351670_C_T	10	123351670	C	T	2263	FGFR2	-	intron			intronic	FGFR2	.	.	.	.	.	.	.	.	.	.	.	.	.	.	.	.	.	.	SSC	11029.s1	11029	simplex	11029.f1	11029.m1	male	.	513	317
1665	13537.p1||10_123357662_T_A	genome	NDD	autism	10_123357662_T_A	10	123357662	T	A	2263	FGFR2	-	5'UTR			UTR5	FGFR2	NM_001144918:c.-4331A>T;NM_001320658:c.-4331A>T;NM_000141:c.-4331A>T;NM_022970:c.-4331A>T;NM_001144917:c.-4331A>T;NM_001144919:c.-4331A>T	.	.	.	.	.	.	.	.	.	.	.	.	.	.	.	.	.	SSC	13537.p1	13537	simplex	13537.f1	13537.m1	male	86	362	374
1666	AU073003||10_123504957_T_C	genome	NDD	autism	10_123504957_T_C	10	123504957	T	C	11101	ATE1	-	intron	SINE	1	intronic	ATE1	.	.	.	.	.	.	.	.	.	.	.	.	.	.	.	.	.	.	Yuen2017	AU073003	FAM_AU073006	MPX	AU073002	AU073001	M		NA	NA
1667	14110.s1||10_123505002_T_A	genome	control	control	10_123505002_T_A	10	123505002	T	A	11101	ATE1	-	intron	SINE	1	intronic	ATE1	.	.	.	.	.	.	.	.	.	.	.	.	.	.	.	.	.	.	SSC	14110.s1	14110	simplex	14110.f1	14110.m1	female	.	513	396
1668	14174.p1||10_123508971_T_C	genome	NDD	autism	10_123508971_T_C	10	123508971	T	C	11101	ATE1	-	intron			intronic	ATE1	.	.	.	.	.	.	.	.	.	.	.	.	.	.	.	.	.	.	SSC	14174.p1	14174	simplex	14174.f1	14174.m1	male	89	392	391
1669	13894.p1||10_123510300_T_C	genome	NDD	autism	10_123510300_T_C	10	123510300	T	C	11101	ATE1	-	intron			intronic	ATE1	.	.	.	.	.	.	.	.	.	.	.	.	.	.	.	.	.	.	SSC	13894.p1	13894	simplex	13894.f1	13894.m1	male	109	251	258
1670	13135.s1||10_123517704_A_G	genome	control	control	10_123517704_A_G	10	123517704	A	G	11101	ATE1	-	intron			intronic	ATE1	.	.	.	.	.	.	.	.	.	.	.	.	.	.	.	.	.	.	SSC	13135.s1	13135	simplex	13135.f1	13135.m1	male	.	446	416
1671	14233.s1||10_123523629_A_G	genome	control	control	10_123523629_A_G	10	123523629	A	G	11101	ATE1	-	intron	LINE	1	intronic	ATE1	.	.	.	.	.	.	.	.	.	.	.	.	.	.	.	.	.	.	SSC	14233.s1	14233	simplex	14233.f1	14233.m1	male	.	479	325
1672	2-1290-003||10_123534976_G_A	genome	NDD	autism	10_123534976_G_A	10	123534976	G	A	11101	ATE1	-	intron	LINE	1	intronic	ATE1	.	.	.	.	.	.	.	.	.	.	.	.	.	.	.	.	.	.	Yuen2017	2-1290-003	FAM_2-1290-004	MPX	2-1290-002	2-1290-001	M		NA	NA
1673	13226.p1||10_123538760_G_T	genome	NDD	autism	10_123538760_G_T	10	123538760	G	T	11101	ATE1	-	intron	LINE	1	intronic	ATE1	.	.	.	.	.	.	.	.	.	.	.	.	.	.	.	.	.	.	SSC	13226.p1	13226	simplex	13226.f1	13226.m1	male	87	504	419
1674	2-1337-003||10_123568446_G_A	genome	NDD	autism	10_123568446_G_A	10	123568446	G	A	11101	ATE1	-	intron	DNA	1	intronic	ATE1	.	.	.	.	.	.	.	.	.	.	.	.	.	.	.	.	.	.	Yuen2016	2-1337-003	FAM_2-1337-004	SPX	2-1337-002	2-1337-001	F		NA	NA
1675	gonl-105c||10_123572269_C_T	genome	control	control	10_123572269_C_T	10	123572269	C	T	11101	ATE1	-	intron			intronic	ATE1	.	.	.	.	.	.	.	.	.	.	.	.	.	.	.	.	.	.	GONL	gonl-105c							NA	NA
1676	13881.s1||10_123572496_C_T	genome	control	control	10_123572496_C_T	10	123572496	C	T	11101	ATE1	-	intron			intronic	ATE1	.	.	.	.	.	.	.	.	.	.	.	.	.	.	.	.	.	.	SSC	13881.s1	13881	simplex	13881.f1	13881.m1	female	.	561	449
1677	14085.p1||10_123578519_T_C	genome	NDD	autism	10_123578519_T_C	10	123578519	T	C	11101	ATE1	-	intron			intronic	ATE1	.	.	.	.	.	.	.	.	.	.	.	.	.	.	.	.	.	.	SSC	14085.p1	14085	simplex	14085.f1	14085.m1	male	89	446	404
1678	13578.p1||10_123622789_G_T	genome	NDD	autism	10_123622789_G_T	10	123622789	G	T	11101	ATE1	-	intron	SINE	1	intronic	ATE1	.	.	.	.	.	.	.	.	.	.	.	.	.	.	.	.	.	.	Turner_2017	13578.p1							NA	NA
1679	12225.s1||10_1236314_A_G	genome	control	control	10_1236314_A_G	10	1236314	A	G	105	ADARB2	-	intron			intronic	ADARB2	.	.	.	.	.	.	.	.	.	.	.	.	.	.	.	.	.	.	Turner_2017	12225.s1							NA	NA
1680	AU3636302||10_123635867_T_C	genome	NDD	autism	10_123635867_T_C	10	123635867	T	C	11101	ATE1	-	intron			intronic	ATE1	.	.	.	.	.	.	.	.	.	.	.	.	.	.	.	.	.	.	Yuen2017	AU3636302	FAM_AU3636302	MPX	AU3636201	AU3636202	M		NA	NA
1681	14406.s1||10_123641106_T_G	genome	control	control	10_123641106_T_G	10	123641106	T	G	11101	ATE1	-	intron	SINE	1	intronic	ATE1	.	.	.	.	.	.	.	.	.	.	.	.	.	.	.	.	.	.	SSC	14406.s1	14406	simplex	14406.f1	14406.m1	male	.	340	346
1682	12083.s1||10_123643778_G_T	genome	control	control	10_123643778_G_T	10	123643778	G	T	11101	ATE1	-	intron	SINE	1	intronic	ATE1	.	.	.	.	.	.	.	.	.	.	.	.	.	.	.	.	.	.	SSC	12083.s1	12083	simplex	12083.f1	12083.m1	female	.	384	381
1683	13631.p1||10_123646468_C_T	genome	NDD	autism	10_123646468_C_T	10	123646468	C	T	11101	ATE1	-	intron			intronic	ATE1	.	.	.	.	.	.	.	.	.	.	.	.	.	.	.	.	.	.	SSC	13631.p1	13631	simplex	13631.f1	13631.m1	male	64	419	408
1684	14047.p1||10_123646536_T_C	genome	NDD	autism	10_123646536_T_C	10	123646536	T	C	11101	ATE1	-	intron			intronic	ATE1	.	.	.	.	.	.	.	.	.	.	.	.	.	.	.	.	.	.	SSC	14047.p1	14047	simplex	14047.f1	14047.m1	male	94	427	428
1685	2-0306-003|2-0306-004||10_123657852_G_A	genome	NDD	autism	10_123657852_G_A	10	123657852	G	A	11101	ATE1	-	intron	DNA	1	intronic	ATE1	.	.	.	.	.	.	.	.	.	.	.	.	.	.	.	.	.	.	Yuen2016;Yuen2017	2-0306-003|2-0306-004	;FAM_2-0306-004	;SPX	;2-0306-002	;2-0306-001	;M		NA	NA
1686	5-0030-003||10_123659046_T_C	genome	NDD	autism	10_123659046_T_C	10	123659046	T	C	11101	ATE1	-	intron			intronic	ATE1	.	.	.	.	.	.	.	.	.	.	.	.	.	.	.	.	.	.	Yuen2017	5-0030-003	FAM_5-0030-003	SPX	5-0030-002	5-0030-001	M		NA	NA
1687	1-0487-003||10_123661428_T_G	genome	NDD	autism	10_123661428_T_G	10	123661428	T	G	11101	ATE1	-	intron			intronic	ATE1	.	.	.	.	.	.	.	.	.	.	.	.	.	.	.	.	.	.	Yuen2016	1-0487-003	FAM_1-0487-003	SPX	1-0487-002	1-0487-001	F		NA	NA
1688	12724.p1||10_123675354_C_A	genome	NDD	autism	10_123675354_C_A	10	123675354	C	A	11101	ATE1	-	intron	SINE	1	intronic	ATE1	.	.	.	.	.	.	.	.	.	.	.	.	.	.	.	.	.	.	Turner_2017	12724.p1							NA	NA
1689	AU4093302||10_123732391_A_G	genome	NDD	autism	10_123732391_A_G	10	123732391	A	G	54780	NSMCE4A	-	intron			intronic	NSMCE4A	.	.	.	.	.	.	.	.	.	.	.	.	.	.	.	.	.	.	Yuen2017	AU4093302	FAM_AU4093304	MPX	AU4093201	AU4093202	F		NA	NA
1690	13305.s1||10_123733047_G_A	genome	control	control	10_123733047_G_A	10	123733047	G	A	54780	NSMCE4A	-	exon_unclassified			intronic	NSMCE4A	.	.	.	.	.	.	.	.	.	.	.	.	.	.	.	.	.	.	SSC	13305.s1	13305	simplex	13305.f1	13305.m1	female	.	411	386
1691	12582.s1||10_123755986_C_T	genome	control	control	10_123755986_C_T	10	123755986	C	T	10579	TACC2	+	intron	LTR	1	intronic	TACC2	.	.	.	.	.	.	.	.	.	.	.	.	.	.	.	.	.	.	Turner_2017;SSC	12582.s1	;12582	;simplex	;12582.f1	;12582.m1	;male	;.	NA;386	NA;268
1692	13506.p1||10_123757052_G_A	genome	NDD	autism	10_123757052_G_A	10	123757052	G	A	10579	TACC2	+	intron			intronic	TACC2	.	.	.	.	.	.	.	.	.	.	.	.	.	.	.	.	.	.	SSC	13506.p1	13506	simplex	13506.f1	13506.m1	male	78	364	265
1693	14150.p1||10_123764720_C_T	genome	NDD	autism	10_123764720_C_T	10	123764720	C	T	10579	TACC2	+	intron	SINE	1	intronic	TACC2	.	.	.	.	.	.	.	.	.	.	.	.	.	.	.	.	.	.	Turner_2017	14150.p1							NA	NA
1694	2-1487-003||10_123780098_T_C	genome	NDD	autism	10_123780098_T_C	10	123780098	T	C	10579	TACC2	+	intron			intronic	TACC2	.	.	.	.	.	.	.	.	.	.	.	.	.	.	.	.	.	.	Yuen2017	2-1487-003	FAM_2-1487-003	SPX	2-1487-002	2-1487-001	M		NA	NA
1695	2-0143-004||10_123781977_C_G	genome	NDD	autism	10_123781977_C_G	10	123781977	C	G	10579	TACC2	+	intron	SINE	1	intronic	TACC2	.	.	.	.	.	.	.	.	.	.	.	.	.	.	.	.	.	.	Yuen2017	2-0143-004	FAM_2-0143-005	MPX	2-0143-002	2-0143-001	M		NA	NA
1696	12796.p1||10_123783473_G_A	genome	NDD	autism	10_123783473_G_A	10	123783473	G	A	10579	TACC2	+	intron	DNA	1	intronic	TACC2	.	.	.	.	.	.	.	.	.	.	.	.	.	.	.	.	.	.	Turner_2017;SSC	12796.p1	;12796	;simplex	;12796.f1	;12796.m1	;male	;72	NA;302	NA;301
1697	2-1148-004||10_123802521_G_A	genome	NDD	autism	10_123802521_G_A	10	123802521	G	A	10579	TACC2	+	intron			intronic	TACC2	.	.	.	.	.	.	.	.	.	.	.	.	.	.	.	.	.	.	Yuen2017	2-1148-004	FAM_2-1148-004	MPX	2-1148-002	2-1148-001	F		NA	NA
[truncated: 170,110 more rows]

## Sheet: studies
Sample distribution in studie							Phenotype distribution
[truncated: 11 more rows]
