# Supplementary material for: Reference-informed prediction of alternative splicing and splicing-altering mutations from sequences
Source: HighWire-hosted journal article supplement (doi:10.1101/gr.279044.124), 2024-07-01
Supplement: Supplemental_Table_S6.xlsx [file Supplemental_Table_S6.xlsx]

## Sheet: var
Table S6: Summary of de novo mutations in neurodevelopmental disorder patients and controls identified by whole exome sequencing (WES). Only genic single nucleotide variants (SNVs) are included.
										cz lab gene annotation																										study/sample information
#	eventID	SequenceType	group	Primary Phenotype	varID	Chr	POS	Ref	Alt	gene_id	gene_symbol	strand	region	rmsk_type	rmsk_fraction	Func.refGene	Gene.refGene	GeneDetail.refGene	ExonicFunc.refGene	AAChange.refGene	SIFT_pred	Polyphen2_HDIV_pred	Polyphen2_HVAR_pred	LRT_pred	MutationTaster_pred	MutationAssessor_pred	FATHMM_pred	PROVEAN_pred	MetaSVM_pred	MetaLR_pred	M-CAP_pred	fathmm-MKL_coding_pred	CADD_phred	phyloP20way_mammalian	phastCons20way_mammalian	StudyName	SampleID	FAMILYID	FAMILYTYPE	FATHERID	MOTHERID	gender	NVIQ	FatherAgeBirth	MotherAgeBirth
1	DDDP102057||10_100011447_C_T	exome	NDD	DD	10_100011447_C_T	10	100011447	C	T	84171	LOXL4	-	CDS			exonic	LOXL4	.	nonsynonymous SNV	LOXL4:NM_032211:exon13:c.G1964A:p.R655H	T	D	D	D	D	M	T	D	T	T	D	D	34	0.852	0.985	Heyne_2018	DDDP102057		simplex			male	NA	NA	NA
2	58290699||10_100148155_C_G	exome	NDD	tourette_syndrome	10_100148155_C_G	10	100148155	C	G	84795	PYROXD2	-	CDS			exonic	PYROXD2	.	nonsynonymous SNV	PYROXD2:NM_032709:exon13:c.G1403C:p.G468A	D	P	P	D	D	H	T	D	T	T	D	D	26.1	0.892	0.997	Willsey2017	58290699						NA	NA	NA
3	EGAN00001101261||10_100159849_C_T	exome	NDD	autism	10_100159849_C_T	10	100159849	C	T	84795	PYROXD2	-	intron			intronic	PYROXD2	.	.	.	.	.	.	.	.	.	.	.	.	.	.	.	.	.	.	Satterstrom2020	EGAN00001101261	EGAN00001101261		EGAN00001101139	EGAN00001101138	Female	NA	NA	NA
4	10C107587||10_100242389_G_A	exome	NDD	autism	10_100242389_G_A	10	100242389	G	A	60495	HPSE2	-	intron			intronic	HPSE2	.	.	.	.	.	.	.	.	.	.	.	.	.	.	.	.	.	.	Satterstrom2020	10C107587	10C107587		10C107586	10C107585	Male	NA	NA	NA
5	DDDP117752||10_100453658_G_T	exome	NDD	DD	10_100453658_G_T	10	100453658	G	T	60495	HPSE2	-	CDS			exonic	HPSE2	.	nonsynonymous SNV	HPSE2:NM_001166245:exon4:c.C667A:p.H223N,HPSE2:NM_001166244:exon5:c.C829A:p.H277N,HPSE2:NM_001166246:exon6:c.C1003A:p.H335N,HPSE2:NM_021828:exon6:c.C1003A:p.H335N	D	D	P	D	D	M	T	D	T	T	D	D	29.1	1.048	1	Heyne_2018	DDDP117752		simplex			female	NA	NA	NA
6	DDDP116638||10_101166526_T_G	exome	NDD	DD	10_101166526_T_G	10	101166526	T	G	2805	GOT1	-	CDS||3'UTR			exonic	GOT1	.	synonymous SNV	GOT1:NM_002079:exon3:c.A381C:p.T127T	.	.	.	.	.	.	.	.	.	.	.	.	.	.	.	Heyne_2018	DDDP116638		simplex			female	NA	NA	NA
7	DDDP100009||10_101180393_G_T	exome	NDD	DD	10_101180393_G_T	10	101180393	G	T	2805	GOT1	-	CDS			exonic	GOT1	.	synonymous SNV	GOT1:NM_002079:exon2:c.C288A:p.L96L	.	.	.	.	.	.	.	.	.	.	.	.	.	.	.	Heyne_2018	DDDP100009		simplex			male	NA	NA	NA
8	NP152||10_101295137_G_A	exome	NDD	autism	10_101295137_G_A	10	101295137	G	A	159296	NKX2-3	+	CDS			exonic	NKX2-3	.	nonsynonymous SNV	NKX2-3:NM_145285:exon2:c.G754A:p.V252M	T	P	B	N	D	L	T	N	T	T	D	D	24	0.898	0.999	Satterstrom2020	NP152	NP152		NF237	NF238	Male	NA	NA	NA
9	08C73959||10_101371064_G_A	exome	control	control	10_101371064_G_A	10	101371064	G	A	81894	SLC25A28	-	CDS			exonic	SLC25A28	.	nonsynonymous SNV	SLC25A28:NM_031212:exon4:c.C637T:p.R213W	D	P	B	D	D	M	T	D	D	D	D	D	25.8	1.048	0.996	Satterstrom2020	08C73959	08C73959		08C73957	08C73956	Female	NA	NA	NA
10	DDDP113025||10_101478137_T_C	exome	NDD	DD	10_101478137_T_C	10	101478137	T	C	1355	COX15	-	CDS			exonic	COX15	.	nonsynonymous SNV	COX15:NM_001320974:exon7:c.A953G:p.N318S,COX15:NM_001320976:exon7:c.A416G:p.N139S,COX15:NM_004376:exon7:c.A953G:p.N318S,COX15:NM_078470:exon7:c.A953G:p.N318S	D	P	P	D	D	M	D	D	D	D	D	D	25.5	1.061	1	Heyne_2018	DDDP113025		simplex			female	NA	NA	NA
11	413||10_101480762_A_G	exome	NDD	ID	10_101480762_A_G	10	101480762	A	G	1355	COX15	-	CDS			exonic	COX15	.	nonsynonymous SNV	COX15:NM_001320974:exon6:c.T814C:p.F272L,COX15:NM_001320975:exon6:c.T814C:p.F272L,COX15:NM_001320976:exon6:c.T277C:p.F93L,COX15:NM_004376:exon6:c.T814C:p.F272L,COX15:NM_078470:exon6:c.T814C:p.F272L	T	B	B	D	D	L	T	D	T	T	D	D	23.2	1.199	0.967	Heyne_2018	413		simplex			female	NA	NA	NA
12	Lelieveld_413||10_101480762_A_G	exome	NDD	ID	10_101480762_A_G	10	101480762	A	G	1355	COX15	-	CDS			exonic	COX15	.	nonsynonymous SNV	COX15:NM_001320974:exon6:c.T814C:p.F272L,COX15:NM_001320975:exon6:c.T814C:p.F272L,COX15:NM_001320976:exon6:c.T277C:p.F93L,COX15:NM_004376:exon6:c.T814C:p.F272L,COX15:NM_078470:exon6:c.T814C:p.F272L	T	B	B	D	D	L	T	D	T	T	D	D	23.2	1.199	0.967	Lelieveld2016	Lelieveld_413						NA	NA	NA
13	200675402@1082034616||10_101491694_C_G	exome	NDD	autism	10_101491694_C_G	10	101491694	C	G	1355	COX15	-	intron			intronic	COX15	.	.	.	.	.	.	.	.	.	.	.	.	.	.	.	.	.	.	Satterstrom2020	200675402@1082034616	200675402@1082034616		200675400@1082034640	200675401@1082034494	Male	NA	NA	NA
14	08C73727||10_101578555_T_A	exome	NDD	autism	10_101578555_T_A	10	101578555	T	A	1244	ABCC2	+	CDS			exonic	ABCC2	.	nonsynonymous SNV	ABCC2:NM_000392:exon18:c.T2280A:p.N760K	D	D	D	D	D	L	D	D	D	D	D	D	27.5	1.059	1	Satterstrom2020	08C73727	08C73727		08C73728	08C73729	Male	NA	NA	NA
15	DDDP111967||10_101590187_G_A	exome	NDD	DD	10_101590187_G_A	10	101590187	G	A	1244	ABCC2	+	CDS			exonic	ABCC2	.	nonsynonymous SNV	ABCC2:NM_000392:exon20:c.G2744A:p.R915H	T	B	B	N	D	M	D	N	T	D	D	D	21.7	0.111	0.316	Heyne_2018	DDDP111967		simplex			male	NA	NA	NA
16	AU133A||10_101637066_C_A	exome	NDD	autism	10_101637066_C_A	10	101637066	C	A	23268	DNMBP	-	CDS			exonic	DNMBP	.	nonsynonymous SNV	DNMBP:NM_001318326:exon14:c.G3472T:p.A1158S,DNMBP:NM_001318327:exon14:c.G2440T:p.A814S,DNMBP:NM_015221:exon17:c.G4576T:p.A1526S	T	P	P	N	D	M	T	N	T	T	T	D	25.7	0.85	1	DeRubeis2014	AU133A						NA	NA	NA
17	DDDP112659||10_101659780_G_A	exome	NDD	DD	10_101659780_G_A	10	101659780	G	A	23268	DNMBP	-	CDS			exonic	DNMBP	.	synonymous SNV	DNMBP:NM_001318326:exon4:c.C1494T:p.Y498Y,DNMBP:NM_001318327:exon4:c.C462T:p.Y154Y,DNMBP:NM_015221:exon7:c.C2598T:p.Y866Y	.	.	.	.	.	.	.	.	.	.	.	.	.	.	.	Heyne_2018	DDDP112659		simplex			female	NA	NA	NA
18	EGAN00001101124||10_101715017_A_T	exome	NDD	autism	10_101715017_A_T	10	101715017	A	T	23268	DNMBP	-	CDS			exonic	DNMBP	.	stopgain	DNMBP:NM_015221:exon4:c.T2214A:p.C738X	.	.	.	N	A	.	.	.	.	.	.	D	35	-0.604	0.004	Satterstrom2020	EGAN00001101124	EGAN00001101124		EGAN00001100921	EGAN00001101237	Male	NA	NA	NA
19	DDDP100537||10_101715124_G_A	exome	NDD	DD	10_101715124_G_A	10	101715124	G	A	23268	DNMBP	-	CDS			exonic	DNMBP	.	nonsynonymous SNV	DNMBP:NM_015221:exon4:c.C2107T:p.R703W	D	D	B	N	N	L	T	D	T	T	T	N	25.3	-0.411	0.051	Heyne_2018	DDDP100537		simplex			male	NA	NA	NA
20	14469.s1||10_101715714_G_A	exome	control	control	10_101715714_G_A	10	101715714	G	A	23268	DNMBP	-	CDS			exonic	DNMBP	.	nonsynonymous SNV	DNMBP:NM_015221:exon4:c.C1517T:p.T506I	D	B	B	N	N	L	T	N	T	T	T	N	2.627	1.047	0.007	Iossifov;Satterstrom2020	14469.s1	;14469		;14469.fa	;14469.mo	;Male	NA	NA	NA
21	12060.s1||10_101716819_C_T	exome	control	control	10_101716819_C_T	10	101716819	C	T	23268	DNMBP	-	CDS			exonic	DNMBP	.	nonsynonymous SNV	DNMBP:NM_015221:exon4:c.G412A:p.A138T	T	B	B	N	N	N	T	N	T	T	T	N	15.11	0.934	0.191	Satterstrom2020	12060.s1	12060		12060.fa	12060.mo	Female	NA	NA	NA
22	AU133A||10_101731776_C_T	exome	NDD	autism	10_101731776_C_T	10	101731776	C	T	23268	DNMBP	-	CDS			exonic	DNMBP	.	nonsynonymous SNV	DNMBP:NM_015221:exon2:c.G106A:p.D36N	T	D	D	D	D	L	T	N	T	T	T	D	27.2	0.93	1	DeRubeis2014;Satterstrom2020	AU133A	;AU133A		;AU133B	;AU133C	;Male	NA	NA	NA
23	11290.s1||10_101823328_A_C	exome	control	control	10_101823328_A_C	10	101823328	A	C	1369	CPN1	-	intron			intronic	CPN1	.	.	.	.	.	.	.	.	.	.	.	.	.	.	.	.	.	.	Satterstrom2020	11290.s1	11290		SSC02828	SSC03115	Female	NA	NA	NA
24	497-05-104034||10_101911819_G_A	exome	NDD	autism	10_101911819_G_A	10	101911819	G	A	10613	ERLIN1	-	3'UTR			UTR3	ERLIN1	NM_006459:c.*69C>T;NM_001100626:c.*69C>T;NM_001347856:c.*69C>T;NM_001347858:c.*69C>T;NM_001347857:c.*69C>T;NM_001347861:c.*69C>T;NM_001347860:c.*69C>T;NM_001347859:c.*69C>T	.	.	.	.	.	.	.	.	.	.	.	.	.	.	.	.	.	Satterstrom2020	497-05-104034	497-05-104034		360-05-104041	359-05-104038	Male	NA	NA	NA
25	25028.p1||10_101964911_A_G	exome	NDD	tourette_syndrome	10_101964911_A_G	10	101964911	A	G	1147	CHUK	-	CDS			exonic	CHUK	.	nonsynonymous SNV	CHUK:NM_001278:exon12:c.T1277C:p.V426A,CHUK:NM_001320928:exon12:c.T1277C:p.V426A	T	P	B	D	D	L	T	N	T	T	D	D	23.3	1.199	0.999	Willsey2017	25028.p1						NA	NA	NA
26	DEASD_1099_001||10_101978726_T_A	exome	NDD	autism	10_101978726_T_A	10	101978726	T	A	1147	CHUK	-	intron			intronic	CHUK	.	.	.	.	.	.	.	.	.	.	.	.	.	.	.	.	.	.	Satterstrom2020	DEASD_1099_001	DEASD_1099_001		DEASD_1099_500	DEASD_1099_600	Male	NA	NA	NA
27	08C75780||10_102054305_A_G	exome	NDD	autism	10_102054305_A_G	10	102054305	A	G	9033	PKD2L1	-	CDS			exonic	PKD2L1	.	nonsynonymous SNV	PKD2L1:NM_001253837:exon9:c.T1505C:p.F502S,PKD2L1:NM_016112:exon9:c.T1646C:p.F549S	T	D	D	D	D	M	D	D	D	D	D	D	27	1.199	1	Satterstrom2020	08C75780	08C75780		08C75778	08C75779	Male	NA	NA	NA
28	AU163A||10_102054351_G_A	exome	NDD	autism	10_102054351_G_A	10	102054351	G	A	9033	PKD2L1	-	CDS			exonic	PKD2L1	.	nonsynonymous SNV	PKD2L1:NM_001253837:exon9:c.C1459T:p.R487C,PKD2L1:NM_016112:exon9:c.C1600T:p.R534C	D	P	B	D	D	M	T	D	T	T	D	D	32	0.079	0.998	DeRubeis2014;Satterstrom2020	AU163A	;AU163A		;AU163B	;AU163C	;Male	NA	NA	NA
29	04C35995||10_102054439_C_T	exome	NDD	autism	10_102054439_C_T	10	102054439	C	T	9033	PKD2L1	-	intron			intronic	PKD2L1	.	.	.	.	.	.	.	.	.	.	.	.	.	.	.	.	.	.	Satterstrom2020	04C35995	04C35995		04C36592	04C35713	Female	NA	NA	NA
30	DDDP101866||10_102056755_C_T	exome	NDD	DD	10_102056755_C_T	10	102056755	C	T	9033	PKD2L1	-	CDS			exonic	PKD2L1	.	synonymous SNV	PKD2L1:NM_001253837:exon6:c.G1026A:p.L342L,PKD2L1:NM_016112:exon6:c.G1167A:p.L389L	.	.	.	.	.	.	.	.	.	.	.	.	.	.	.	Heyne_2018	DDDP101866		simplex			female	NA	NA	NA
31	13102.p1||10_102056960_A_C	exome	NDD	autism	10_102056960_A_C	10	102056960	A	C	9033	PKD2L1	-	CDS			exonic	PKD2L1	.	nonsynonymous SNV	PKD2L1:NM_001253837:exon6:c.T821G:p.V274G,PKD2L1:NM_016112:exon6:c.T962G:p.V321G	D	D	D	D	D	M	T	D	D	D	D	D	28	1.199	0.997	Satterstrom2020	13102.p1	13102		4960	4992	Female	NA	NA	NA
32	08C73616||10_102058507_G_A	exome	NDD	autism	10_102058507_G_A	10	102058507	G	A	9033	PKD2L1	-	CDS			exonic	PKD2L1	.	synonymous SNV	PKD2L1:NM_001253837:exon4:c.C402T:p.G134G,PKD2L1:NM_016112:exon4:c.C543T:p.G181G	.	.	.	.	.	.	.	.	.	.	.	.	.	.	.	Satterstrom2020	08C73616	08C73616		08C73618	08C73617	Female	NA	NA	NA
33	10C109063||10_102300559_C_G	exome	NDD	autism	10_102300559_C_G	10	102300559	C	G	55662	HIF1AN	+	intron	SINE	1	intronic	HIF1AN	.	.	.	.	.	.	.	.	.	.	.	.	.	.	.	.	.	.	Satterstrom2020	10C109063	10C109063		10C109064	10C109062	Male	NA	NA	NA
34	DDDP114453||10_102777937_C_G	exome	NDD	DD	10_102777937_C_G	10	102777937	C	G	79955	PDZD7	-	CDS			exonic	PDZD7	.	nonsynonymous SNV	PDZD7:NM_001195263:exon9:c.G1441C:p.A481P,PDZD7:NM_001351044:exon9:c.G1469C:p.S490T,PDZD7:NM_024895:exon9:c.G1441C:p.A481P	D	P	B	N	N	L	T	N	T	T	T	N	22.7	-0.037	0.17	Heyne_2018	DDDP114453		simplex			male	NA	NA	NA
35	DDDP100321||10_102783746_G_A	exome	NDD	DD	10_102783746_G_A	10	102783746	G	A	79955	PDZD7	-	CDS			exonic	PDZD7	.	synonymous SNV	PDZD7:NM_001195263:exon3:c.C306T:p.R102R,PDZD7:NM_001351044:exon3:c.C306T:p.R102R,PDZD7:NM_024895:exon3:c.C306T:p.R102R	.	.	.	.	.	.	.	.	.	.	.	.	.	.	.	Heyne_2018	DDDP100321		simplex			male	NA	NA	NA
36	DEASD_0088_001||10_102795440_C_T	exome	NDD	autism	10_102795440_C_T	10	102795440	C	T	81855	SFXN3	+	intron			intronic	SFXN3	.	.	.	.	.	.	.	.	.	.	.	.	.	.	.	.	.	.	Satterstrom2020	DEASD_0088_001	DEASD_0088_001		DEASD_0088_500	DEASD_0088_600	Male	NA	NA	NA
37	08C78637||10_102797145_C_T	exome	NDD	autism	10_102797145_C_T	10	102797145	C	T	81855	SFXN3	+	CDS			exonic	SFXN3	.	nonsynonymous SNV	SFXN3:NM_030971:exon9:c.C740T:p.P247L	T	P	P	N	D	L	T	D	T	T	D	D	23.8	0.852	0.477	Satterstrom2020	08C78637	08C78637		08C78633	08C78634	Male	NA	NA	NA
38	AC02-1178-04||10_102822650_C_G	exome	control	control	10_102822650_C_G	10	102822650	C	G	81621	KAZALD1	+	CDS			exonic	KAZALD1	.	nonsynonymous SNV	KAZALD1:NM_030929:exon2:c.C301G:p.H101D	T	B	B	N	N	N	T	N	T	T	T	D	17.68	-0.036	0.997	Satterstrom2020	AC02-1178-04	AC02-1178-04		AC02-1178-02	AC02-1178-03	Female	NA	NA	NA
39	DEASD_0327_001||10_103221816_G_A	exome	NDD	autism	10_103221816_G_A	10	103221816	G	A	8945	BTRC	+	intron			splicing	BTRC	NM_033637:exon3:c.234+1G>A;NM_003939:exon2:c.126+1G>A	.	.	.	.	.	.	D	.	.	.	.	.	.	D	25.2	1.03	1	DeRubeis2014;Satterstrom2020	DEASD_0327_001	;DEASD_0327_001		;DEASD_0327_500	;DEASD_0327_600	;Male	NA	NA	NA
40	3C559||10_103369153_C_G	exome	NDD	autism	10_103369153_C_G	10	103369153	C	G	25911	DPCD	+	CDS			exonic	DPCD	.	synonymous SNV	DPCD:NM_001329742:exon6:c.C570G:p.A190A,DPCD:NM_001329743:exon6:c.C501G:p.A167A,DPCD:NM_015448:exon6:c.C537G:p.A179A,DPCD:NM_001329745:exon7:c.C270G:p.A90A	D	.	.	.	D	.	T	D	T	T	.	N	9.976	-1.632	0.043	Satterstrom2020	3C559	3C559		5L424	5L423	Male	NA	NA	NA
41	11366.p1||10_103557857_T_A	exome	NDD	autism	10_103557857_T_A	10	103557857	T	A	10724	MGEA5	-	CDS			exonic	MGEA5	.	nonsynonymous SNV	MGEA5:NM_001142434:exon9:c.A1705T:p.M569L,MGEA5:NM_012215:exon10:c.A1864T:p.M622L	T	B	B	D	D	L	T	N	T	T	T	D	12.05	1.061	0.998	Krumm	11366.p1						NA	NA	NA
42	NDAR_INVFU720GFQ_wes1||10_103826022_C_T	exome	NDD	autism	10_103826022_C_T	10	103826022	C	T	79803	HPS6	+	CDS			exonic	HPS6	.	nonsynonymous SNV	HPS6:NM_024747:exon1:c.C791T:p.P264L	T	B	B	N	N	M	T	N	T	T	D	N	18.37	0.059	0.993	DeRubeis2014;De_Rubeis_2014	NDAR_INVFU720GFQ_wes1	;NDAR_INVFU720GFQ_wes1		;NDAR_INVML924GUP_wes1	;NDAR_INVUP509YPX_wes1	;Male	NA	NA	NA
43	144||10_103827140_C_T	exome	NDD	ID	10_103827140_C_T	10	103827140	C	T	79803	HPS6	+	CDS			exonic	HPS6	.	nonsynonymous SNV	HPS6:NM_024747:exon1:c.C1909T:p.L637F	D	D	D	D	D	M	D	D	D	D	D	D	25.9	0.935	0.985	Heyne_2018	144		simplex			male	NA	NA	NA
44	13322.s1||10_103827308_C_T	exome	control	control	10_103827308_C_T	10	103827308	C	T	79803	HPS6	+	CDS			exonic	HPS6	.	nonsynonymous SNV	HPS6:NM_024747:exon1:c.C2077T:p.R693C	T	B	B	U	D	L	T	N	T	T	D	D	23	0.935	0.912	Iossifov;Satterstrom2020	13322.s1	;13322		;SSC07039	;SSC07033	;Female	NA	NA	NA
45	09C99453||10_103900883_C_G	exome	NDD	autism	10_103900883_C_G	10	103900883	C	G	23082	PPRC1	+	CDS			exonic	PPRC1	.	nonsynonymous SNV	PPRC1:NM_001288727:exon5:c.C2618G:p.P873R,PPRC1:NM_001288728:exon5:c.C2258G:p.P753R,PPRC1:NM_015062:exon5:c.C2618G:p.P873R	D	P	B	N	N	L	T	N	T	T	D	D	2.825	0	0	Satterstrom2020	09C99453	09C99453		08C75908	08C75909	Male	NA	NA	NA
46	12605.p1||10_103908608_C_T	exome	NDD	autism	10_103908608_C_T	10	103908608	C	T	23082	PPRC1	+	CDS			exonic	PPRC1	.	nonsynonymous SNV	PPRC1:NM_001288727:exon10:c.C3860T:p.P1287L,PPRC1:NM_001288728:exon12:c.C4286T:p.P1429L,PPRC1:NM_015062:exon12:c.C4652T:p.P1551L	D	D	D	D	D	M	T	D	T	T	D	D	26.1	0.776	0.998	Satterstrom2020	12605.p1	12605		SSC05454	SSC06550	Male	NA	NA	NA
47	13850.s1||10_103908623_G_A	exome	control	control	10_103908623_G_A	10	103908623	G	A	23082	PPRC1	+	CDS			exonic	PPRC1	.	nonsynonymous SNV	PPRC1:NM_001288727:exon10:c.G3875A:p.R1292Q,PPRC1:NM_001288728:exon12:c.G4301A:p.R1434Q,PPRC1:NM_015062:exon12:c.G4667A:p.R1556Q	D	D	D	D	D	N	T	N	T	T	T	D	26.1	0.867	0.978	Iossifov;Satterstrom2020	13850.s1	;13850		;13850.fa	;13850.mo	;Male	NA	NA	NA
48	13494.p1||10_103917282_T_G	exome	NDD	autism	10_103917282_T_G	10	103917282	T	G	9221	NOLC1	+	CDS||5'UTR			exonic	NOLC1	.	nonsynonymous SNV	NOLC1:NM_001284388:exon4:c.T411G:p.D137E,NOLC1:NM_001284389:exon4:c.T414G:p.D138E,NOLC1:NM_004741:exon4:c.T411G:p.D137E	T	B	B	N	N	N	T	N	T	T	T	N	0.002	-0.341	0.712	Iossifov;Satterstrom2020	13494.p1	;13494		;4968	;5000	;Female	NA	NA	NA
49	ajc||10_103920251_C_G	exome	NDD	EE	10_103920251_C_G	10	103920251	C	G	9221	NOLC1	+	CDS			exonic	NOLC1	.	nonsynonymous SNV	NOLC1:NM_001284388:exon10:c.C1172G:p.A391G,NOLC1:NM_001284389:exon10:c.C1145G:p.A382G,NOLC1:NM_004741:exon10:c.C1142G:p.A381G	T	B	B	N	N	M	T	N	T	T	T	N	2.066	-0.991	0.027	Heyne_2018	ajc		simplex			male	NA	NA	NA
50	13838.s1||10_103990692_G_A	exome	control	control	10_103990692_G_A	10	103990692	G	A	5309	PITX3	-	CDS			exonic	PITX3	.	nonsynonymous SNV	PITX3:NM_005029:exon4:c.C488T:p.P163L	D	B	B	D	D	N	D	D	T	T	D	D	24.2	0.803	0.991	Krumm	13838.s1						NA	NA	NA
51	AC02-1177-01||10_104123570_T_C	exome	NDD	autism	10_104123570_T_C	10	104123570	T	C	8729	GBF1	+	intron			intronic	GBF1	.	.	.	.	.	.	.	.	.	.	.	.	.	.	.	.	.	.	Satterstrom2020	AC02-1177-01	AC02-1177-01		AC02-1177-02	AC02-1177-03	Male	NA	NA	NA
52	DDDP119678||10_104130206_G_A	exome	NDD	DD	10_104130206_G_A	10	104130206	G	A	8729	GBF1	+	CDS			exonic	GBF1	.	synonymous SNV	GBF1:NM_001199378:exon28:c.G3477A:p.E1159E,GBF1:NM_001199379:exon28:c.G3474A:p.E1158E,GBF1:NM_004193:exon28:c.G3474A:p.E1158E	.	.	.	.	.	.	.	.	.	.	.	.	.	.	.	Heyne_2018	DDDP119678		simplex			male	NA	NA	NA
53	08C74627||10_104130496_G_A	exome	NDD	autism	10_104130496_G_A	10	104130496	G	A	8729	GBF1	+	CDS			exonic	GBF1	.	nonsynonymous SNV	GBF1:NM_001199378:exon29:c.G3539A:p.R1180Q,GBF1:NM_001199379:exon29:c.G3536A:p.R1179Q,GBF1:NM_004193:exon29:c.G3536A:p.R1179Q	T	D	B	D	D	L	T	N	T	T	T	D	26.7	0.953	0.997	Satterstrom2020	08C74627	08C74627		08C74629	08C74630	Male	NA	NA	NA
54	DEASD_1027_001||10_104157267_A_G	exome	NDD	autism	10_104157267_A_G	10	104157267	A	G	4791	NFKB2	+	intron			intronic	NFKB2	.	.	.	.	.	.	.	.	.	.	.	.	.	.	.	.	.	.	Satterstrom2020	DEASD_1027_001	DEASD_1027_001		DEASD_1027_500	DEASD_1027_600	Male	NA	NA	NA
55	12494.s1||10_104165274_G_A	exome	control	control	10_104165274_G_A	10	104165274	G	A	5662	PSD	-	CDS			exonic	PSD	.	nonsynonymous SNV	PSD:NM_002779:exon12:c.C2155T:p.R719C,PSD:NM_001270965:exon13:c.C2155T:p.R719C,PSD:NM_001270966:exon13:c.C1018T:p.R340C	D	D	P	N	D	L	T	D	T	T	T	D	34	0.877	1	Krumm;Satterstrom2020	12494.s1	;12494		;SSC04832	;SSC04787	;Female	NA	NA	NA
56	14035.p1||10_104170802_C_T	exome	NDD	autism	10_104170802_C_T	10	104170802	C	T	5662	PSD	-	intron			intronic	PSD	.	.	.	.	.	.	.	.	.	.	.	.	.	.	.	.	.	.	Iossifov;Satterstrom2020	14035.p1	;14035		;14035.fa	;14035.mo	;Female	NA	NA	NA
57	3362-1||10_104231069_G_A	exome	NDD	schizophrenia	10_104231069_G_A	10	104231069	G	A	79847	TMEM180	+	CDS||5'UTR			exonic	MFSD13A	.	synonymous SNV	MFSD13A:NM_024789:exon6:c.G744A:p.A248A	.	.	.	.	.	.	.	.	.	.	.	.	.	.	.	Fromer2014	3362-1						NA	NA	NA
58	12763.p1||10_104263992_C_A	exome	NDD	autism;ASD	10_104263992_C_A	10	104263992	C	A	51684	SUFU	+	CDS			exonic	SUFU	.	stopgain	SUFU:NM_001178133:exon1:c.C83A:p.S28X,SUFU:NM_016169:exon1:c.C83A:p.S28X	.	.	.	D	A	.	.	.	.	.	.	D	36	0.781	0.982	Iossifov;Heyne_2018;Satterstrom2020	12763.p1	;12763	;simplex	;SSC06414	;SSC06409	;male;Male	NA	NA	NA
59	ASDFI_1432||10_104377281_C_G	exome	NDD	autism	10_104377281_C_G	10	104377281	C	G	51684	SUFU	+	CDS			intronic	SUFU	.	.	.	.	.	.	.	.	.	.	.	.	.	.	.	.	.	.	Satterstrom2020	ASDFI_1432	ASDFI_1432		ASDFI_1422	ASDFI_1431	Male	NA	NA	NA
60	807|Lelieveld_807||10_104404546_G_A	exome	NDD	ID;ID	10_104404546_G_A	10	104404546	G	A	81603	TRIM8	+	CDS			exonic	TRIM8	.	nonsynonymous SNV	TRIM8:NM_001345950:exon1:c.G172A:p.A58T,TRIM8:NM_030912:exon1:c.G172A:p.A58T	T	B	B	D	D	N	T	N	T	T	T	D	23.4	0.952	1	Heyne_2018;Lelieveld2016	807|Lelieveld_807		simplex;			male;	NA	NA	NA
61	09C87366||10_104536122_G_A	exome	NDD	autism	10_104536122_G_A	10	104536122	G	A	54838	WBP1L	+	5'UTR			UTR5	WBP1L	NM_017787:c.-26G>A	.	.	.	.	.	.	.	.	.	.	.	.	.	.	.	.	.	Satterstrom2020	09C87366	09C87366		09C87364	09C87365	Male	NA	NA	NA
62	12671.s1||10_104572683_G_A	exome	control	control	10_104572683_G_A	10	104572683	G	A	54838	WBP1L	+	CDS			exonic	WBP1L	.	synonymous SNV	WBP1L:NM_001083913:exon4:c.G687A:p.P229P,WBP1L:NM_017787:exon4:c.G624A:p.P208P	.	.	.	.	.	.	.	.	.	.	.	.	.	.	.	Krumm;Satterstrom2020	12671.s1	;12671		;SSC05207	;SSC05202	;Female	NA	NA	NA
63	10C116616||10_104595121_C_T	exome	NDD	autism	10_104595121_C_T	10	104595121	C	T	1586	CYP17A1	-	CDS			exonic	CYP17A1	.	nonsynonymous SNV	CYP17A1:NM_000102:exon2:c.G326A:p.R109H	D	P	P	N	N	L	T	N	T	T	D	N	22.5	-0.863	0	DeRubeis2014;Satterstrom2020	10C116616	;10C116616		;10C116617	;10C116618	;Male	NA	NA	NA
64	369-07-108784||10_104678569_A_G	exome	NDD	autism	10_104678569_A_G	10	104678569	A	G	54805	CNNM2	+	CDS			exonic	CNNM2	.	nonsynonymous SNV	CNNM2:NM_017649:exon1:c.A332G:p.N111S,CNNM2:NM_199076:exon1:c.A332G:p.N111S,CNNM2:NM_199077:exon1:c.A332G:p.N111S	T	B	B	D	D	L	T	N	T	T	D	N	3.362	1.091	1	Satterstrom2020	369-07-108784	369-07-108784		002-08-108787	001-08-108786	Male	NA	NA	NA
65	11053.s1||10_104835900_G_A	exome	control	control	10_104835900_G_A	10	104835900	G	A	54805	CNNM2	+	CDS			exonic	CNNM2	.	nonsynonymous SNV	CNNM2:NM_199076:exon6:c.G2225A:p.R742Q,CNNM2:NM_017649:exon7:c.G2291A:p.R764Q	T	P	P	D	D	M	T	N	T	T	T	D	24	1.048	0.244	Iossifov;Satterstrom2020	11053.s1	;11053		;11053.fa	;11053.mo	;Male	NA	NA	NA
66	AU041A||10_104835900_G_A	exome	NDD	autism	10_104835900_G_A	10	104835900	G	A	54805	CNNM2	+	CDS			exonic	CNNM2	.	nonsynonymous SNV	CNNM2:NM_199076:exon6:c.G2225A:p.R742Q,CNNM2:NM_017649:exon7:c.G2291A:p.R764Q	T	P	P	D	D	M	T	N	T	T	T	D	24	1.048	0.244	DeRubeis2014;Satterstrom2020	AU041A	;AU041A		;AU041B	;AU041C	;Female	NA	NA	NA
67	14217.s1||10_104836960_A_G	exome	control	control	10_104836960_A_G	10	104836960	A	G	54805	CNNM2	+	3'UTR			UTR3	CNNM2	NM_017649:c.*23A>G;NM_199076:c.*23A>G	.	.	.	.	.	.	.	.	.	.	.	.	.	.	.	.	.	Satterstrom2020	14217.s1	14217		14217.fa	14217.mo	Male	NA	NA	NA
68	AU084A||10_104854118_C_T	exome	NDD	autism	10_104854118_C_T	10	104854118	C	T	22978	NT5C2	-	CDS			exonic	NT5C2	.	nonsynonymous SNV	NT5C2:NM_001351181:exon10:c.G335A:p.R112H,NT5C2:NM_001351174:exon11:c.G821A:p.R274H,NT5C2:NM_001351183:exon11:c.G335A:p.R112H,NT5C2:NM_001351191:exon11:c.G335A:p.R112H,NT5C2:NM_001134373:exon12:c.G908A:p.R303H,NT5C2:NM_001351176:exon12:c.G335A:p.R112H,NT5C2:NM_001351180:exon12:c.G335A:p.R112H,NT5C2:NM_001351192:exon12:c.G335A:p.R112H,NT5C2:NM_001351194:exon12:c.G194A:p.R65H,NT5C2:NM_001351169:exo…	D	D	P	D	D	M	T	D	T	T	D	D	35	0.935	0.984	DeRubeis2014;Satterstrom2020	AU084A	;AU084A		;AU084B	;AU084C	;Female	NA	NA	NA
69	91||10_105046853_T_C	exome	NDD	ID	10_105046853_T_C	10	105046853	T	C	9118	INA	+	CDS			exonic	INA	.	nonsynonymous SNV	INA:NM_032727:exon2:c.T1127C:p.L376P	D	D	D	D	D	H	D	D	D	D	D	D	29.7	1.061	0.998	Heyne_2018	91		simplex			female	NA	NA	NA
70	12208.p1||10_105160315_A_G	exome	NDD	autism	10_105160315_A_G	10	105160315	A	G	22984	PDCD11	+	intron			intronic	PDCD11	.	.	.	.	.	.	.	.	.	.	.	.	.	.	.	.	.	.	Satterstrom2020	12208.p1	12208		12208.fa	12208.mo	Male	NA	NA	NA
71	1396.504||10_105178335_C_T	exome	NDD	ID	10_105178335_C_T	10	105178335	C	T	22984	PDCD11	+	CDS			exonic	PDCD11	.	stopgain	PDCD11:NM_014976:exon15:c.C2050T:p.Q684X	.	.	.	D	A	.	.	.	.	.	.	D	37	0.925	0.836	Heyne_2018	1396.5		simplex			female	NA	NA	NA
72	14643.p1||10_105184868_G_A	exome	NDD	autism;ASD	10_105184868_G_A	10	105184868	G	A	22984	PDCD11	+	CDS			exonic	PDCD11	.	nonsynonymous SNV	PDCD11:NM_014976:exon20:c.G2891A:p.R964H	T	B	B	N	N	L	T	N	T	T	T	D	22.4	0.12	1	Iossifov;Heyne_2018;Satterstrom2020	14643.p1	;14643	;simplex	;37080	;37082	;female;Female	NA	NA	NA
73	14643.s1||10_105184868_G_A	exome	control	control	10_105184868_G_A	10	105184868	G	A	22984	PDCD11	+	CDS			exonic	PDCD11	.	nonsynonymous SNV	PDCD11:NM_014976:exon20:c.G2891A:p.R964H	T	B	B	N	N	L	T	N	T	T	T	D	22.4	0.12	1	Krumm;Satterstrom2020	14643.s1	;14643		;37080	;37082	;Female	NA	NA	NA
74	2068-1||10_105184868_G_A	exome	NDD	schizophrenia	10_105184868_G_A	10	105184868	G	A	22984	PDCD11	+	CDS			exonic	PDCD11	.	nonsynonymous SNV	PDCD11:NM_014976:exon20:c.G2891A:p.R964H	T	B	B	N	N	L	T	N	T	T	T	D	22.4	0.12	1	Fromer2014	2068-1						NA	NA	NA
75	MR535||10_105233469_G_A	exome	NDD	autism	10_105233469_G_A	10	105233469	G	A	119395	CALHM3	-	intron			intronic	CALHM3	.	.	.	.	.	.	.	.	.	.	.	.	.	.	.	.	.	.	Satterstrom2020	MR535	MR535		MR536	MR537	Male	NA	NA	NA
76	13350.p1||10_105238707_G_A	exome	NDD	autism	10_105238707_G_A	10	105238707	G	A	119395	CALHM3	-	CDS			exonic	CALHM3	.	nonsynonymous SNV	CALHM3:NM_001129742:exon1:c.C83T:p.A28V	T	B	B	N	N	N	T	N	T	T	T	N	10.9	0.076	0.941	Iossifov;Satterstrom2020	13350.p1	;13350		;SSC07379	;SSC07374	;Male	NA	NA	NA
77	13177.p1||10_105331386_C_T	exome	NDD	autism	10_105331386_C_T	10	105331386	C	T	9148	NEURL	+	CDS			exonic	NEURL1	.	synonymous SNV	NEURL1:NM_004210:exon3:c.C456T:p.F152F	.	.	.	.	.	.	.	.	.	.	.	.	.	.	.	Satterstrom2020	13177.p1	13177		4959	4991	Female	NA	NA	NA
78	DEASD_0339_001||10_105363080_G_C	exome	NDD	autism	10_105363080_G_C	10	105363080	G	C	9644	SH3PXD2A	-	CDS			exonic	SH3PXD2A	.	nonsynonymous SNV	SH3PXD2A:NM_014631:exon14:c.C1811G:p.T604S	T	B	B	N	D	N	T	N	T	T	T	D	1.642	0.051	0.997	DeRubeis2014;Satterstrom2020	DEASD_0339_001	;DEASD_0339_001		;DEASD_0339_500	;DEASD_0339_600	;Male	NA	NA	NA
79	12228.p1||10_105495554_A_G	exome	NDD	autism	10_105495554_A_G	10	105495554	A	G	9644	SH3PXD2A	-	CDS			exonic	SH3PXD2A	.	nonsynonymous SNV	SH3PXD2A:NM_014631:exon4:c.T242C:p.F81S	D	D	D	D	D	H	T	D	D	D	D	D	28	1.199	1	Krumm	12228.p1						NA	NA	NA
80	13866.s1||10_105792656_C_T	exome	control	control	10_105792656_C_T	10	105792656	C	T	1308	COL17A1	-	intron			intronic	COL17A1	.	.	.	.	.	.	.	.	.	.	.	.	.	.	.	.	.	.	Krumm;Satterstrom2020	13866.s1	;13866		;SSC08545	;SSC08543	;Female	NA	NA	NA
81	260-06-106291||10_105802254_G_A	exome	control	control	10_105802254_G_A	10	105802254	G	A	1308	COL17A1	-	intron			intronic	COL17A1	.	.	.	.	.	.	.	.	.	.	.	.	.	.	.	.	.	.	Satterstrom2020	260-06-106291	260-06-106291		259-06-106289	258-06-106286	Male	NA	NA	NA
82	13328.s1||10_105809897_G_A	exome	control	control	10_105809897_G_A	10	105809897	G	A	1308	COL17A1	-	intron			intronic	COL17A1	.	.	.	.	.	.	.	.	.	.	.	.	.	.	.	.	.	.	Iossifov;Satterstrom2020	13328.s1	;13328		;SSC08417	;SSC08410	;Male	NA	NA	NA
83	G01-GEA-240-HI||10_105816781_G_T	exome	NDD	autism	10_105816781_G_T	10	105816781	G	T	1308	COL17A1	-	CDS			exonic	COL17A1	.	nonsynonymous SNV	COL17A1:NM_000494:exon17:c.C1417A:p.L473I	D	D	D	N	D	M	T	N	T	T	D	D	24.1	0.752	0.998	Satterstrom2020	G01-GEA-240-HI	G01-GEA-240-HI		G01-GEA-240-PA	G01-GEA-240-MA	Female	NA	NA	NA
84	13601.s1||10_105953578_A_G	exome	control	control	10_105953578_A_G	10	105953578	A	G	80217	WDR96	-	3'UTR			intronic	CFAP43	.	.	.	.	.	.	.	.	.	.	.	.	.	.	.	.	.	.	Satterstrom2020	13601.s1	13601		SSC08357	SSC08353	Male	NA	NA	NA
85	DDDP111306||10_106074180_T_C	exome	NDD	DD	10_106074180_T_C	10	106074180	T	C	85450	ITPRIP	-	CDS			exonic	ITPRIP	.	nonsynonymous SNV	ITPRIP:NM_001272012:exon2:c.A1630G:p.T544A,ITPRIP:NM_001272013:exon2:c.A1630G:p.T544A,ITPRIP:NM_033397:exon3:c.A1630G:p.T544A	T	B	B	N	N	N	T	N	T	T	T	N	0.007	-0.329	0.01	Heyne_2018	DDDP111306		simplex			female	NA	NA	NA
86	DEASD_0231_001||10_1061781_G_A	exome	NDD	autism	10_1061781_G_A	10	1061781	G	A	23560	GTPBP4	+	CDS			exonic	GTPBP4	.	nonsynonymous SNV	GTPBP4:NM_012341:exon16:c.G1697A:p.R566Q	D	P	B	D	D	M	T	N	T	T	T	D	25.8	0.998	0.052	DeRubeis2014;Satterstrom2020	DEASD_0231_001	;DEASD_0231_001		;DEASD_0231_500	;DEASD_0231_600	;Male	NA	NA	NA
87	369-07-108784||10_1066766_C_T	exome	NDD	autism	10_1066766_C_T	10	1066766	C	T	91734	IDI2	-	CDS			exonic	IDI2	.	nonsynonymous SNV	IDI2:NM_033261:exon4:c.G307A:p.G103R	D	D	D	N	D	H	.	D	T	T	T	D	24.4	-0.045	0.003	Satterstrom2020	369-07-108784	369-07-108784		002-08-108787	001-08-108786	Male	NA	NA	NA
88	AC02-1141-01||10_107005369_C_T	exome	NDD	autism	10_107005369_C_T	10	107005369	C	T	22986	SORCS3	+	CDS			exonic	SORCS3	.	stopgain	SORCS3:NM_014978:exon21:c.C2938T:p.Q980X	.	.	.	D	A	.	.	.	.	.	.	D	49	0.935	1	DeRubeis2014;Satterstrom2020	AC02-1141-01	;AC02-1141-01		;AC02-1141-02	;AC02-1141-03	;Male	NA	NA	NA
89	14151.p1||10_108389096_C_T	exome	NDD	autism	10_108389096_C_T	10	108389096	C	T	114815	SORCS1	-	CDS			exonic	SORCS1	.	synonymous SNV	SORCS1:NM_001013031:exon19:c.G2526A:p.A842A,SORCS1:NM_001206569:exon19:c.G2526A:p.A842A,SORCS1:NM_001206570:exon19:c.G2526A:p.A842A,SORCS1:NM_001206571:exon19:c.G2526A:p.A842A,SORCS1:NM_001206572:exon19:c.G2526A:p.A842A,SORCS1:NM_052918:exon19:c.G2526A:p.A842A	.	.	.	.	.	.	.	.	.	.	.	.	.	.	.	Satterstrom2020	14151.p1	14151		SSC10806	SSC10804	Male	NA	NA	NA
90	11000.p1||10_108447964_C_T	exome	NDD	autism;ASD	10_108447964_C_T	10	108447964	C	T	114815	SORCS1	-	CDS			exonic	SORCS1	.	nonsynonymous SNV	SORCS1:NM_001013031:exon10:c.G1546A:p.V516M,SORCS1:NM_001206569:exon10:c.G1546A:p.V516M,SORCS1:NM_001206570:exon10:c.G1546A:p.V516M,SORCS1:NM_001206571:exon10:c.G1546A:p.V516M,SORCS1:NM_001206572:exon10:c.G1546A:p.V516M,SORCS1:NM_052918:exon10:c.G1546A:p.V516M	D	D	P	D	D	L	T	N	T	T	T	N	23.9	0.935	0.951	Iossifov;Heyne_2018;Satterstrom2020	11000.p1	;11000	;simplex	;SSC02219	;SSC02217	;male;Male	NA	NA	NA
91	14198.p1||10_111629696_T_C	exome	NDD	autism	10_111629696_T_C	10	111629696	T	C	7511	XPNPEP1	-	intron			intronic	XPNPEP1	.	.	.	.	.	.	.	.	.	.	.	.	.	.	.	.	.	.	Satterstrom2020	14198.p1	14198		14198.fa	14198.mo	Male	NA	NA	NA
92	13998.p1||10_1118115_G_A	exome	NDD	autism	10_1118115_G_A	10	1118115	G	A	22884	WDR37	+	CDS			exonic	WDR37	.	nonsynonymous SNV	WDR37:NM_014023:exon2:c.G20A:p.S7N	T	B	B	D	D	L	T	N	T	T	T	D	23.4	0.098	0.981	Iossifov;Satterstrom2020	13998.p1	;13998		;SSC09932	;SSC09930	;Male	NA	NA	NA
93	14479.p1||10_111872668_C_A	exome	NDD	autism	10_111872668_C_A	10	111872668	C	A	120	ADD3	+	CDS			exonic	ADD3	.	nonsynonymous SNV	ADD3:NM_001121:exon3:c.C329A:p.P110H,ADD3:NM_001320592:exon3:c.C329A:p.P110H,ADD3:NM_001320593:exon3:c.C329A:p.P110H,ADD3:NM_016824:exon3:c.C329A:p.P110H,ADD3:NM_019903:exon3:c.C329A:p.P110H,ADD3:NM_001320591:exon4:c.C329A:p.P110H,ADD3:NM_001320594:exon4:c.C95A:p.P32H	T	D	P	D	D	L	T	N	T	T	T	D	29.2	0.925	0.997	Satterstrom2020	14479.p1	14479		SSC11958	SSC11955	Male	NA	NA	NA
94	14547.s1||10_111882047_C_A	exome	control	control	10_111882047_C_A	10	111882047	C	A	120	ADD3	+	CDS			exonic	ADD3	.	nonsynonymous SNV	ADD3:NM_001121:exon9:c.C1140A:p.N380K,ADD3:NM_001320592:exon9:c.C1140A:p.N380K,ADD3:NM_001320593:exon9:c.C1140A:p.N380K,ADD3:NM_016824:exon9:c.C1140A:p.N380K,ADD3:NM_019903:exon9:c.C1140A:p.N380K,ADD3:NM_001320591:exon10:c.C1140A:p.N380K,ADD3:NM_001320594:exon10:c.C906A:p.N302K	D	P	P	D	D	M	T	D	T	T	D	D	26.2	-0.249	0.994	Satterstrom2020	14547.s1	14547		36833	36835	Male	NA	NA	NA
95	IGM1411007||10_111988056_C_T	exome	NDD	autism	10_111988056_C_T	10	111988056	C	T	4601	MXI1	+	CDS			exonic	MXI1	.	synonymous SNV	MXI1:NM_001008541:exon2:c.C75T:p.S25S,MXI1:NM_005962:exon2:c.C183T:p.S61S,MXI1:NM_130439:exon2:c.C384T:p.S128S	.	.	.	.	.	.	.	.	.	.	.	.	.	.	.	Satterstrom2020	IGM1411007	IGM1411007		IGM1411007F	IGM1411007M	Male	NA	NA	NA
96	DDDP106936||10_112270118_G_T	exome	NDD	DD	10_112270118_G_T	10	112270118	G	T	1847	DUSP5	+	CDS			exonic	DUSP5	.	synonymous SNV	DUSP5:NM_004419:exon4:c.G1089T:p.P363P	.	.	.	.	.	.	.	.	.	.	.	.	.	.	.	Heyne_2018	DDDP106936		simplex			female	NA	NA	NA
97	470|Lelieveld_470||10_112333465_T_C	exome	NDD	ID;ID	10_112333465_T_C	10	112333465	T	C	9126	SMC3	+	CDS			exonic	SMC3	.	nonsynonymous SNV	SMC3:NM_005445:exon3:c.T92C:p.V31A	D	D	D	D	D	M	D	D	D	D	D	D	26.4	1.061	1	Heyne_2018;Lelieveld2016	470|Lelieveld_470		simplex;			male;	NA	NA	NA
98	DDDP100034||10_112352960_A_G	exome	NDD	DD	10_112352960_A_G	10	112352960	A	G	9126	SMC3	+	CDS			exonic	SMC3	.	nonsynonymous SNV	SMC3:NM_005445:exon18:c.A1942G:p.M648V	T	B	B	D	D	N	D	N	T	T	D	D	18.47	1.14	1	Heyne_2018	DDDP100034		simplex			male	NA	NA	NA
99	11519.p1||10_112359556_C_T	exome	NDD	autism;ASD	10_112359556_C_T	10	112359556	C	T	9126	SMC3	+	CDS			exonic	SMC3	.	nonsynonymous SNV	SMC3:NM_005445:exon21:c.C2413T:p.R805C	D	D	D	D	D	L	T	D	D	D	D	D	34	0.892	0.996	Iossifov;Heyne_2018;Satterstrom2020	11519.p1	;11519	;simplex	;SSC02438	;SSC02435	;male;Male	NA	NA	NA
100	DDDP100315||10_112362724_C_G	exome	NDD	DD	10_112362724_C_G	10	112362724	C	G	9126	SMC3	+	CDS			exonic	SMC3	.	nonsynonymous SNV	SMC3:NM_005445:exon27:c.C3439G:p.Q1147E	T	D	D	D	D	M	D	N	D	D	D	D	23.4	0.876	1	Heyne_2018	DDDP100315		simplex			male	NA	NA	NA
101	DDDP103925||10_112363029_G_C	exome	NDD	DD	10_112363029_G_C	10	112363029	G	C	9126	SMC3	+	CDS			exonic	SMC3	.	nonsynonymous SNV	SMC3:NM_005445:exon28:c.G3563C:p.G1188A	D	D	D	D	D	M	T	D	D	D	D	D	23.4	1.048	1	Heyne_2018	DDDP103925		simplex			female	NA	NA	NA
102	12875.p1||10_112570155_C_T	exome	NDD	ASD;autism	10_112570155_C_T	10	112570155	C	T	282996	RBM20	+	CDS			exonic	RBM20	.	synonymous SNV	RBM20:NM_001134363:exon8:c.C1815T:p.A605A	.	.	.	.	.	.	.	.	.	.	.	.	.	.	.	Heyne_2018;Satterstrom2020	12875.p1	;12875	simplex;	;SSC06022	;SSC06021	male;Male	NA	NA	NA
103	DD15852||10_112581359_C_T	exome	NDD	ID;ID	10_112581359_C_T	10	112581359	C	T	282996	RBM20	+	CDS			exonic	RBM20	.	synonymous SNV	RBM20:NM_001134363:exon11:c.C2982T:p.D994D	.	.	.	.	.	.	.	.	.	.	.	.	.	.	.	Rauch2012;Heyne_2018	DD15852		;simplex			;female	NA	NA	NA
104	580.24||10_112590911_C_G	exome	NDD	ID	10_112590911_C_G	10	112590911	C	G	282996	RBM20	+	CDS			exonic	RBM20	.	nonsynonymous SNV	RBM20:NM_001134363:exon13:c.C3544G:p.R1182G	D	D	D	.	D	M	T	D	T	T	D	D	33	0.807	0.922	Heyne_2018	580.24		simplex				NA	NA	NA
105	14342.p1||10_112647536_T_C	exome	NDD	autism	10_112647536_T_C	10	112647536	T	C	27250	PDCD4	+	CDS			exonic	PDCD4	.	synonymous SNV	PDCD4:NM_001199492:exon6:c.T627C:p.L209L,PDCD4:NM_014456:exon6:c.T669C:p.L223L,PDCD4:NM_145341:exon7:c.T636C:p.L212L	.	.	.	.	.	.	.	.	.	.	.	.	.	.	.	Krumm	14342.p1						NA	NA	NA
106	13301.s1||10_112650336_G_A	exome	control	control	10_112650336_G_A	10	112650336	G	A	27250	PDCD4	+	CDS			exonic	PDCD4	.	nonsynonymous SNV	PDCD4:NM_001199492:exon8:c.G856A:p.V286M,PDCD4:NM_014456:exon8:c.G898A:p.V300M,PDCD4:NM_145341:exon9:c.G865A:p.V289M	D	P	B	D	D	M	T	N	T	T	D	D	28.4	1.048	0.989	Iossifov;Satterstrom2020	13301.s1	;13301		;SSC07176	;SSC07173	;Male	NA	NA	NA
107	429||10_112724120_A_G	exome	NDD	ID	10_112724120_A_G	10	112724120	A	G	8036	SHOC2	+	CDS			exonic	SHOC2	.	nonsynonymous SNV	SHOC2:NM_001269039:exon2:c.A4G:p.S2G,SHOC2:NM_001324336:exon2:c.A4G:p.S2G,SHOC2:NM_007373:exon2:c.A4G:p.S2G,SHOC2:NM_001324337:exon3:c.A4G:p.S2G	D	P	D	D	D	M	T	N	T	T	T	D	24.5	1.083	1	Heyne_2018	429		simplex			male	NA	NA	NA
108	DDDP111207||10_112724120_A_G	exome	NDD	DD	10_112724120_A_G	10	112724120	A	G	8036	SHOC2	+	CDS			exonic	SHOC2	.	nonsynonymous SNV	SHOC2:NM_001269039:exon2:c.A4G:p.S2G,SHOC2:NM_001324336:exon2:c.A4G:p.S2G,SHOC2:NM_007373:exon2:c.A4G:p.S2G,SHOC2:NM_001324337:exon3:c.A4G:p.S2G	D	P	D	D	D	M	T	N	T	T	T	D	24.5	1.083	1	Heyne_2018	DDDP111207		simplex			male	NA	NA	NA
109	Lelieveld_429||10_112724120_A_G	exome	NDD	ID	10_112724120_A_G	10	112724120	A	G	8036	SHOC2	+	CDS			exonic	SHOC2	.	nonsynonymous SNV	SHOC2:NM_001269039:exon2:c.A4G:p.S2G,SHOC2:NM_001324336:exon2:c.A4G:p.S2G,SHOC2:NM_007373:exon2:c.A4G:p.S2G,SHOC2:NM_001324337:exon3:c.A4G:p.S2G	D	P	D	D	D	M	T	N	T	T	T	D	24.5	1.083	1	Lelieveld2016	Lelieveld_429						NA	NA	NA
110	AC02-1155-01||10_112837882_A_G	exome	NDD	autism	10_112837882_A_G	10	112837882	A	G	150	ADRA2A	+	CDS			exonic	ADRA2A	.	nonsynonymous SNV	ADRA2A:NM_000681:exon1:c.A128G:p.Y43C	D	D	D	U	D	L	T	D	T	T	D	D	25.3	1.199	0.998	Satterstrom2020	AC02-1155-01	AC02-1155-01		AC02-1155-02	AC02-1155-03	Male	NA	NA	NA
111	14011.s1||10_11330451_C_T	exome	control	control	10_11330451_C_T	10	11330451	C	T	10659	CELF2	+	CDS			exonic	CELF2	.	synonymous SNV	CELF2:NM_001326346:exon7:c.C207T:p.A69A,CELF2:NM_001326333:exon8:c.C207T:p.A69A,CELF2:NM_001326338:exon8:c.C558T:p.A186A,CELF2:NM_001326339:exon8:c.C558T:p.A186A,CELF2:NM_001025076:exon9:c.C819T:p.A273A,CELF2:NM_001025077:exon9:c.C891T:p.A297A,CELF2:NM_001083591:exon9:c.C819T:p.A273A,CELF2:NM_001326329:exon9:c.C819T:p.A273A,CELF2:NM_001326330:exon9:c.C819T:p.A273A,CELF2:NM_001326331:exon9:c.C891T…	.	.	.	.	.	.	.	.	.	.	.	.	.	.	.	Iossifov;Satterstrom2020	14011.s1	;14011		;6191	;6223	;Female	NA	NA	NA
112	DDDP111072||10_113928079_A_G	exome	NDD	DD	10_113928079_A_G	10	113928079	A	G	57678	GPAM	-	CDS			exonic	GPAM	.	synonymous SNV	GPAM:NM_001244949:exon11:c.T1098C:p.G366G,GPAM:NM_020918:exon11:c.T1098C:p.G366G	.	.	.	.	.	.	.	.	.	.	.	.	.	.	.	Heyne_2018	DDDP111072		simplex			male	NA	NA	NA
113	DDDP111242||10_113928230_C_T	exome	NDD	DD	10_113928230_C_T	10	113928230	C	T	57678	GPAM	-	CDS			exonic	GPAM	.	nonsynonymous SNV	GPAM:NM_001244949:exon11:c.G947A:p.G316D,GPAM:NM_020918:exon11:c.G947A:p.G316D	D	D	D	D	D	M	D	D	D	D	D	D	25.9	0.843	1	Heyne_2018	DDDP111242		simplex			female	NA	NA	NA
114	11433.s1||10_114059343_C_A	exome	control	control	10_114059343_C_A	10	114059343	C	A	6975	TECTB	+	intron			intronic	TECTB	.	.	.	.	.	.	.	.	.	.	.	.	.	.	.	.	.	.	Iossifov	11433.s1						NA	NA	NA
115	13371.s1||10_114061923_G_A	exome	control	control	10_114061923_G_A	10	114061923	G	A	6975	TECTB	+	intron			intronic	TECTB	.	.	.	.	.	.	.	.	.	.	.	.	.	.	.	.	.	.	Iossifov;Satterstrom2020	13371.s1	;13371		;68746	;68748	;Female	NA	NA	NA
116	4261-1||10_114154676_G_A	exome	NDD	schizophrenia	10_114154676_G_A	10	114154676	G	A	51703	ACSL5	+	CDS||5'UTR			exonic	ACSL5	.	nonsynonymous SNV	ACSL5:NM_016234:exon2:c.G140A:p.G47D	T	D	D	N	D	.	T	N	T	T	D	D	23.7	1.048	1	Fromer2014	4261-1						NA	NA	NA
117	12011.s1||10_114298044_T_G	exome	control	control	10_114298044_T_G	10	114298044	T	G	143187	VTI1A	+	CDS			exonic	VTI1A	.	nonsynonymous SNV	VTI1A:NM_001318205:exon5:c.T382G:p.S128A,VTI1A:NM_145206:exon5:c.T382G:p.S128A,VTI1A:NM_001318203:exon6:c.T403G:p.S135A	D	P	P	D	D	L	T	N	T	D	D	D	23.5	0.964	0.999	Satterstrom2020	12011.s1	12011		5842	5874	Male	NA	NA	NA
118	DDDP104732||10_114428034_G_A	exome	NDD	DD	10_114428034_G_A	10	114428034	G	A	143187	VTI1A	+	CDS			exonic	VTI1A	.	nonsynonymous SNV	VTI1A:NM_001318205:exon6:c.G485A:p.R162Q,VTI1A:NM_145206:exon6:c.G485A:p.R162Q,VTI1A:NM_001318203:exon7:c.G506A:p.R169Q	D	D	D	D	D	M	T	D	D	D	D	D	32	1.048	0.997	Heyne_2018	DDDP104732		simplex			female	NA	NA	NA
119	13888.p1||10_114849308_C_T	exome	NDD	autism	10_114849308_C_T	10	114849308	C	T	6934	TCF7L2	+	intron			intronic	TCF7L2	.	.	.	.	.	.	.	.	.	.	.	.	.	.	.	.	.	.	Krumm;Satterstrom2020	13888.p1	;13888		;SSC09273	;SSC08929	;Male	NA	NA	NA
120	13069.p1||10_114901076_G_A	exome	NDD	ASD;autism	10_114901076_G_A	10	114901076	G	A	6934	TCF7L2	+	intron			splicing	TCF7L2	NM_001146274:exon6:c.685+1G>A;NM_001198530:exon4:c.514+1G>A;NM_001146283:exon6:c.757+1G>A;NM_030756:exon5:c.616+1G>A;NM_001146286:exon5:c.616+1G>A;NM_001198531:exon6:c.685+1G>A;NM_001198525:exon5:c.616+1G>A;NM_001198527:exon5:c.616+1G>A;NM_001198526:exon5:c.616+1G>A;NM_001198529:exon5:c.616+1G>A;NM_001198528:exon5:c.616+1G>A;NM_001146285:exon5:c.616+1G>A;NM_001146284:exon5:c.616+1G>A;NM_001349871…	.	.	.	.	.	.	D	.	.	.	.	.	.	D	27.9	1.044	0.99	Heyne_2018;Satterstrom2020	13069.p1	;13069	simplex;	;13069.fa	;13069.mo	male;Male	NA	NA	NA
121	DDDP109949||10_114903733_C_T	exome	NDD	DD	10_114903733_C_T	10	114903733	C	T	6934	TCF7L2	+	CDS||5'UTR			exonic	TCF7L2	.	nonsynonymous SNV	TCF7L2:NM_001349870:exon3:c.C308T:p.S103L,TCF7L2:NM_001349871:exon3:c.C188T:p.S63L,TCF7L2:NM_001198530:exon5:c.C566T:p.S189L,TCF7L2:NM_001146284:exon6:c.C668T:p.S223L,TCF7L2:NM_001146285:exon6:c.C668T:p.S223L,TCF7L2:NM_001146286:exon6:c.C668T:p.S223L,TCF7L2:NM_001198525:exon6:c.C668T:p.S223L,TCF7L2:NM_001198526:exon6:c.C668T:p.S223L,TCF7L2:NM_001198527:exon6:c.C668T:p.S223L,TCF7L2:NM_001198528:ex…	D	P	B	D	D	M	D	D	D	D	D	D	31	0.931	0.989	Heyne_2018	DDDP109949		simplex			male	NA	NA	NA
122	12090.p1||10_114910883_G_A	exome	NDD	autism	10_114910883_G_A	10	114910883	G	A	6934	TCF7L2	+	intron			splicing	TCF7L2	NM_001146274:exon9:c.1001+1G>A;NM_001198530:exon7:c.830+1G>A;NM_001146283:exon9:c.1073+1G>A;NM_030756:exon8:c.932+1G>A;NM_001146286:exon8:c.932+1G>A;NM_001198531:exon9:c.1001+1G>A;NM_001198525:exon8:c.947+1G>A;NM_001198527:exon8:c.920+1G>A;NM_001198526:exon8:c.932+1G>A;NM_001198529:exon8:c.932+1G>A;NM_001198528:exon8:c.932+1G>A;NM_001146285:exon8:c.932+1G>A;NM_001146284:exon8:c.920+1G>A;NM_001349…	.	.	.	.	.	.	D	.	.	.	.	.	.	D	25.8	1.044	0.995	Satterstrom2020	12090.p1	12090		35900	35902	Female	NA	NA	NA
123	685|Lelieveld_685||10_114911625_C_G	exome	NDD	ID;ID	10_114911625_C_G	10	114911625	C	G	6934	TCF7L2	+	CDS			exonic	TCF7L2	.	nonsynonymous SNV	TCF7L2:NM_001349870:exon6:c.C714G:p.N238K,TCF7L2:NM_001349871:exon6:c.C594G:p.N198K,TCF7L2:NM_001198530:exon8:c.C972G:p.N324K,TCF7L2:NM_001146284:exon9:c.C1062G:p.N354K,TCF7L2:NM_001146285:exon9:c.C1074G:p.N358K,TCF7L2:NM_001146286:exon9:c.C1074G:p.N358K,TCF7L2:NM_001198525:exon9:c.C1089G:p.N363K,TCF7L2:NM_001198526:exon9:c.C1074G:p.N358K,TCF7L2:NM_001198527:exon9:c.C1062G:p.N354K,TCF7L2:NM_00119…	D	D	D	D	D	M	D	D	D	D	D	D	32	0.931	1	Heyne_2018;Lelieveld2016	685|Lelieveld_685		simplex;			male;	NA	NA	NA
124	DDDP111017||10_114912149_C_T	exome	NDD	DD	10_114912149_C_T	10	114912149	C	T	6934	TCF7L2	+	CDS			exonic	TCF7L2	.	stopgain	TCF7L2:NM_001349870:exon7:c.C790T:p.R264X,TCF7L2:NM_001349871:exon7:c.C670T:p.R224X,TCF7L2:NM_001198530:exon9:c.C1048T:p.R350X,TCF7L2:NM_001146284:exon10:c.C1138T:p.R380X,TCF7L2:NM_001146285:exon10:c.C1150T:p.R384X,TCF7L2:NM_001146286:exon10:c.C1150T:p.R384X,TCF7L2:NM_001198525:exon10:c.C1165T:p.R389X,TCF7L2:NM_001198526:exon10:c.C1150T:p.R384X,TCF7L2:NM_001198527:exon10:c.C1138T:p.R380X,TCF7L2:N…	.	.	.	D	A	.	.	.	.	.	.	D	45	0.931	0.999	Heyne_2018	DDDP111017		simplex			male	NA	NA	NA
125	11||10_114912198_A_G	exome	NDD	ID	10_114912198_A_G	10	114912198	A	G	6934	TCF7L2	+	CDS			exonic	TCF7L2	.	nonsynonymous SNV	TCF7L2:NM_001349870:exon7:c.A839G:p.Y280C,TCF7L2:NM_001349871:exon7:c.A719G:p.Y240C,TCF7L2:NM_001198530:exon9:c.A1097G:p.Y366C,TCF7L2:NM_001146284:exon10:c.A1187G:p.Y396C,TCF7L2:NM_001146285:exon10:c.A1199G:p.Y400C,TCF7L2:NM_001146286:exon10:c.A1199G:p.Y400C,TCF7L2:NM_001198525:exon10:c.A1214G:p.Y405C,TCF7L2:NM_001198526:exon10:c.A1199G:p.Y400C,TCF7L2:NM_001198527:exon10:c.A1187G:p.Y396C,TCF7L2:N…	D	D	D	D	D	M	D	D	D	D	D	D	32	1.193	1	Heyne_2018	11		simplex			male	NA	NA	NA
126	Lelieveld_11||10_114912198_A_G	exome	NDD	ID	10_114912198_A_G	10	114912198	A	G	6934	TCF7L2	+	CDS			exonic	TCF7L2	.	nonsynonymous SNV	TCF7L2:NM_001349870:exon7:c.A839G:p.Y280C,TCF7L2:NM_001349871:exon7:c.A719G:p.Y240C,TCF7L2:NM_001198530:exon9:c.A1097G:p.Y366C,TCF7L2:NM_001146284:exon10:c.A1187G:p.Y396C,TCF7L2:NM_001146285:exon10:c.A1199G:p.Y400C,TCF7L2:NM_001146286:exon10:c.A1199G:p.Y400C,TCF7L2:NM_001198525:exon10:c.A1214G:p.Y405C,TCF7L2:NM_001198526:exon10:c.A1199G:p.Y400C,TCF7L2:NM_001198527:exon10:c.A1187G:p.Y396C,TCF7L2:N…	D	D	D	D	D	M	D	D	D	D	D	D	32	1.193	1	Lelieveld2016	Lelieveld_11						NA	NA	NA
127	272-06-106053||10_115338459_G_A	exome	NDD	autism	10_115338459_G_A	10	115338459	G	A	3026	HABP2	+	CDS||3'UTR			exonic	HABP2	.	synonymous SNV	HABP2:NM_001177660:exon7:c.G564A:p.A188A,HABP2:NM_004132:exon7:c.G642A:p.A214A	.	.	.	.	.	.	.	.	.	.	.	.	.	.	.	Satterstrom2020	272-06-106053	272-06-106053		274-06-106059	273-06-106056	Male	NA	NA	NA
128	13634.s1||10_115338511_A_T	exome	control	control	10_115338511_A_T	10	115338511	A	T	3026	HABP2	+	CDS||3'UTR			exonic	HABP2	.	nonsynonymous SNV	HABP2:NM_001177660:exon7:c.A616T:p.M206L,HABP2:NM_004132:exon7:c.A694T:p.M232L	T	P	P	D	D	L	T	N	T	T	D	D	23.1	1.199	1	Iossifov;Satterstrom2020	13634.s1	;13634		;SSC08403	;SSC07861	;Female	NA	NA	NA
129	29||10_115345617_C_T	exome	NDD	ID	10_115345617_C_T	10	115345617	C	T	3026	HABP2	+	CDS			exonic	HABP2	.	nonsynonymous SNV	HABP2:NM_001177660:exon12:c.C1360T:p.R454C,HABP2:NM_004132:exon12:c.C1438T:p.R480C	D	D	P	N	D	L	D	D	D	D	D	D	34	0.066	0.695	Heyne_2018	29		simplex			male	NA	NA	NA
130	Lelieveld_29||10_115345617_C_T	exome	NDD	ID	10_115345617_C_T	10	115345617	C	T	3026	HABP2	+	CDS			exonic	HABP2	.	nonsynonymous SNV	HABP2:NM_001177660:exon12:c.C1360T:p.R454C,HABP2:NM_004132:exon12:c.C1438T:p.R480C	D	D	P	N	D	L	D	D	D	D	D	D	34	0.066	0.695	Lelieveld2016	Lelieveld_29						NA	NA	NA
131	G01-GEA-203-HI||10_115383310_G_A	exome	NDD	autism	10_115383310_G_A	10	115383310	G	A	4892	NRAP	-	CDS	LINE	1	exonic	NRAP	.	nonsynonymous SNV	NRAP:NM_006175:exon22:c.C2330T:p.A777V,NRAP:NM_001261463:exon23:c.C2435T:p.A812V,NRAP:NM_198060:exon23:c.C2435T:p.A812V	D	B	B	N	D	M	T	D	T	T	D	D	25.1	1.048	1	Satterstrom2020	G01-GEA-203-HI	G01-GEA-203-HI		G01-GEA-203-PA	G01-GEA-203-MA	Male	NA	NA	NA
132	14563.p1||10_115406755_C_T	exome	NDD	autism	10_115406755_C_T	10	115406755	C	T	4892	NRAP	-	CDS			exonic	NRAP	.	nonsynonymous SNV	NRAP:NM_001261463:exon10:c.G920A:p.G307E,NRAP:NM_001322945:exon10:c.G920A:p.G307E,NRAP:NM_006175:exon10:c.G920A:p.G307E,NRAP:NM_198060:exon10:c.G920A:p.G307E	D	D	D	D	D	M	T	D	T	T	D	D	29.6	0.935	0.94	Iossifov;Satterstrom2020	14563.p1	;14563		;36880	;36882	;Male	NA	NA	NA
133	EGAN00001101262||10_115410242_T_G	exome	NDD	autism	10_115410242_T_G	10	115410242	T	G	4892	NRAP	-	CDS			exonic	NRAP	.	synonymous SNV	NRAP:NM_001261463:exon8:c.A738C:p.T246T,NRAP:NM_001322945:exon8:c.A738C:p.T246T,NRAP:NM_006175:exon8:c.A738C:p.T246T,NRAP:NM_198060:exon8:c.A738C:p.T246T	.	.	.	.	.	.	.	.	.	.	.	.	.	.	.	Satterstrom2020	EGAN00001101262	EGAN00001101262		EGAN00001101393	EGAN00001101392	Male	NA	NA	NA
134	08C79293||10_115411623_G_A	exome	NDD	autism	10_115411623_G_A	10	115411623	G	A	4892	NRAP	-	CDS			exonic	NRAP	.	nonsynonymous SNV	NRAP:NM_001261463:exon7:c.C614T:p.S205F,NRAP:NM_001322945:exon7:c.C614T:p.S205F,NRAP:NM_006175:exon7:c.C614T:p.S205F,NRAP:NM_198060:exon7:c.C614T:p.S205F	D	P	B	N	N	L	T	N	T	T	T	D	22.6	1.048	0.626	DeRubeis2014;Satterstrom2020	08C79293	;08C79293		;08C78218	;08C78219	;Male	NA	NA	NA
135	14265.s1||10_115412648_A_T	exome	control	control	10_115412648_A_T	10	115412648	A	T	4892	NRAP	-	intron			intronic	NRAP	.	.	.	.	.	.	.	.	.	.	.	.	.	.	.	.	.	.	Satterstrom2020	14265.s1	14265		14265.fa	14265.mo	Male	NA	NA	NA
136	DDDP103666||10_115486111_G_A	exome	NDD	DD	10_115486111_G_A	10	115486111	G	A	840	CASP7	+	CDS			exonic	CASP7	.	nonsynonymous SNV	CASP7:NM_033340:exon7:c.G566A:p.G189D	D	B	B	D	D	.	T	D	T	T	T	N	9.369	-0.227	0.706	Heyne_2018	DDDP103666		simplex			male	NA	NA	NA
137	09C81990||10_115527253_A_G	exome	NDD	autism	10_115527253_A_G	10	115527253	A	G	79949	PLEKHS1	+	intron			intronic	PLEKHS1	.	.	.	.	.	.	.	.	.	.	.	.	.	.	.	.	.	.	Satterstrom2020	09C81990	09C81990		09C81994	09C81989	Female	NA	NA	NA
138	04C35939||10_115610349_T_C	exome	NDD	autism	10_115610349_T_C	10	115610349	T	C	9937	DCLRE1A	-	CDS			exonic	DCLRE1A	.	nonsynonymous SNV	DCLRE1A:NM_014881:exon2:c.A515G:p.Y172C,DCLRE1A:NM_001271816:exon3:c.A515G:p.Y172C	D	B	B	D	D	M	T	D	T	T	D	D	24.6	1.061	1	Satterstrom2020	04C35939	04C35939		04C35937	04C35936	Female	NA	NA	NA
139	DDDP111175||10_115964592_G_A	exome	NDD	DD	10_115964592_G_A	10	115964592	G	A	56165	TDRD1	+	CDS			exonic	TDRD1	.	nonsynonymous SNV	TDRD1:NM_198795:exon10:c.G1237A:p.V413I	T	B	B	N	N	M	T	N	T	T	T	N	8.53	-1.356	0.014	Heyne_2018	DDDP111175		simplex			female	NA	NA	NA
140	13864.p1||10_116013495_G_T	exome	NDD	autism	10_116013495_G_T	10	116013495	G	T	340706	VWA2	+	intron			intronic	VWA2	.	.	.	.	.	.	.	.	.	.	.	.	.	.	.	.	.	.	Iossifov;Satterstrom2020	13864.p1	;13864		;13864.fa	;13864.mo	;Male	NA	NA	NA
141	DDDP111195||10_116037780_C_T	exome	NDD	DD	10_116037780_C_T	10	116037780	C	T	340706	VWA2	+	CDS||5'UTR			exonic	VWA2	.	nonsynonymous SNV	VWA2:NM_001272046:exon7:c.C674T:p.S225L,VWA2:NM_001320804:exon7:c.C674T:p.S225L	T	B	B	N	N	L	T	N	T	T	T	N	12.1	0.932	0.033	Heyne_2018	DDDP111195		simplex			female	NA	NA	NA
142	13487.s1||10_116038622_C_A	exome	control	control	10_116038622_C_A	10	116038622	C	A	340706	VWA2	+	intron			intronic	VWA2	.	.	.	.	.	.	.	.	.	.	.	.	.	.	.	.	.	.	Iossifov;Satterstrom2020	13487.s1	;13487		;SSC07628	;SSC07625	;Female	NA	NA	NA
143	10C116619||10_116045797_T_C	exome	control	control	10_116045797_T_C	10	116045797	T	C	340706	VWA2	+	CDS			exonic	VWA2	.	nonsynonymous SNV	VWA2:NM_001272046:exon11:c.T1097C:p.V366A,VWA2:NM_001320804:exon11:c.T1097C:p.V366A	T	B	B	D	D	M	D	N	D	D	D	D	26.4	1.061	0.997	Satterstrom2020	10C116619	10C116619		10C116617	10C116618	Male	NA	NA	NA
144	452-09-112086||10_116049058_C_T	exome	NDD	autism	10_116049058_C_T	10	116049058	C	T	340706	VWA2	+	CDS			exonic	VWA2	.	synonymous SNV	VWA2:NM_001272046:exon12:c.C1932T:p.G644G,VWA2:NM_001320804:exon12:c.C1932T:p.G644G	.	.	.	.	.	.	.	.	.	.	.	.	.	.	.	Satterstrom2020	452-09-112086	452-09-112086		450-09-112084	451-09-112085	Female	NA	NA	NA
145	11471.p1||10_116082909_G_C	exome	NDD	autism	10_116082909_G_C	10	116082909	G	C	84632	AFAP1L2	-	intron			intronic	AFAP1L2	.	.	.	.	.	.	.	.	.	.	.	.	.	.	.	.	.	.	Iossifov;SSC_Iossifov_2014	11471.p1	;11471		;11471.fa	;11471.mo	;Male	NA	NA	NA
146	14386.p1||10_116164208_G_T	exome	NDD	autism	10_116164208_G_T	10	116164208	G	T	84632	AFAP1L2	-	CDS			exonic	AFAP1L2	.	synonymous SNV	AFAP1L2:NM_001001936:exon1:c.C7A:p.R3R,AFAP1L2:NM_001287824:exon1:c.C7A:p.R3R,AFAP1L2:NM_001351064:exon1:c.C7A:p.R3R,AFAP1L2:NM_001351065:exon1:c.C7A:p.R3R,AFAP1L2:NM_001351066:exon1:c.C7A:p.R3R,AFAP1L2:NM_001351067:exon1:c.C7A:p.R3R,AFAP1L2:NM_001351068:exon1:c.C7A:p.R3R,AFAP1L2:NM_001351069:exon1:c.C7A:p.R3R,AFAP1L2:NM_001351074:exon1:c.C7A:p.R3R,AFAP1L2:NM_001351075:exon1:c.C7A:p.R3R,AFAP1L2:N…	.	.	.	.	.	.	.	.	.	.	.	.	.	.	.	Iossifov;Satterstrom2020	14386.p1	;14386		;36148	;36150	;Male	NA	NA	NA
147	DDDP112765||10_116307530_C_T	exome	NDD	DD	10_116307530_C_T	10	116307530	C	T	3983	ABLIM1	-	CDS			exonic	ABLIM1	.	nonsynonymous SNV	ABLIM1:NM_001003407:exon5:c.G499A:p.A167T,ABLIM1:NM_001003408:exon5:c.G499A:p.A167T,ABLIM1:NM_001322882:exon5:c.G499A:p.A167T,ABLIM1:NM_001322883:exon5:c.G499A:p.A167T,ABLIM1:NM_001322884:exon5:c.G448A:p.A150T,ABLIM1:NM_001322885:exon5:c.G448A:p.A150T,ABLIM1:NM_001322886:exon5:c.G448A:p.A150T,ABLIM1:NM_001322887:exon5:c.G499A:p.A167T,ABLIM1:NM_002313:exon5:c.G679A:p.A227T	D	P	B	D	D	M	D	D	D	D	D	D	25	0.935	0.808	Heyne_2018	DDDP112765		simplex			male	NA	NA	NA
148	12481.p1||10_116595301_T_A	exome	NDD	autism	10_116595301_T_A	10	116595301	T	A	57700	FAM160B1	+	CDS			exonic	FAM160B1	.	synonymous SNV	FAM160B1:NM_001135051:exon4:c.T300A:p.P100P,FAM160B1:NM_020940:exon4:c.T300A:p.P100P	.	.	.	.	.	.	.	.	.	.	.	.	.	.	.	Werling_WGS_call	12481.p1	12481		SSC04945	SSC04943	Male	NA	NA	NA
149	3219-1||10_116595383_G_A	exome	NDD	schizophrenia	10_116595383_G_A	10	116595383	G	A	57700	FAM160B1	+	CDS			exonic	FAM160B1	.	nonsynonymous SNV	FAM160B1:NM_001135051:exon4:c.G382A:p.V128M,FAM160B1:NM_020940:exon4:c.G382A:p.V128M	D	D	D	D	D	M	T	N	T	T	D	D	33	0.902	0.965	Fromer2014	3219-1						NA	NA	NA
150	DDDP116533||10_116710879_A_G	exome	NDD	DD	10_116710879_A_G	10	116710879	A	G	142940	TRUB1	+	CDS			exonic	TRUB1	.	nonsynonymous SNV	TRUB1:NM_139169:exon3:c.A412G:p.M138V	T	B	B	D	D	N	T	N	T	T	T	D	14.31	1.14	1	Heyne_2018	DDDP116533		simplex			male	NA	NA	NA
151	14675.p1||10_116730168_T_C	exome	NDD	autism	10_116730168_T_C	10	116730168	T	C	142940	TRUB1	+	CDS			exonic	TRUB1	.	nonsynonymous SNV	TRUB1:NM_139169:exon5:c.T565C:p.F189L	D	D	D	D	D	L	T	D	T	T	T	D	32	1.061	1	Satterstrom2020	14675.p1	14675		SSC12405	SSC12401	Male	NA	NA	NA
152	G01-GEA-285-HI||10_117059688_G_A	exome	NDD	autism	10_117059688_G_A	10	117059688	G	A	26033	ATRNL1	+	CDS			exonic	ATRNL1	.	nonsynonymous SNV	ATRNL1:NM_207303:exon16:c.G2560A:p.A854T	T	B	B	N	D	N	T	N	T	T	T	D	13.13	0.108	0.987	Satterstrom2020	G01-GEA-285-HI	G01-GEA-285-HI		G01-GEA-285-PA	G01-GEA-285-MA	Male	NA	NA	NA
153	12656.p1||10_117061544_A_C	exome	NDD	autism	10_117061544_A_C	10	117061544	A	C	26033	ATRNL1	+	CDS			exonic	ATRNL1	.	nonsynonymous SNV	ATRNL1:NM_207303:exon17:c.A2809C:p.T937P	T	P	B	D	D	N	T	N	T	T	T	D	24.3	1.14	1	Satterstrom2020	12656.p1	12656		SSC05658	SSC05638	Male	NA	NA	NA
154	DDDP112036||10_117061554_G_C	exome	NDD	DD	10_117061554_G_C	10	117061554	G	C	26033	ATRNL1	+	intron			splicing	ATRNL1	NM_207303:exon17:c.2818+1G>C	.	.	.	.	.	.	D	.	.	.	.	.	.	D	26.2	0.998	0.996	Heyne_2018	DDDP112036		simplex			female	NA	NA	NA
155	14404.p1||10_11789383_C_T	exome	NDD	ASD;autism	10_11789383_C_T	10	11789383	C	T	79746	ECHDC3	+	CDS||5'UTR			exonic	ECHDC3	.	nonsynonymous SNV	ECHDC3:NM_024693:exon2:c.C206T:p.A69V	T	D	P	D	D	M	T	D	D	D	D	D	25	0.935	0.734	Heyne_2018;SSC_Iossifov_2014	14404.p1	;14404	simplex;	;14404.fa	;14404.mo	male;Male	NA	NA	NA
156	DDDP114559||10_118215278_C_G	exome	NDD	DD	10_118215278_C_G	10	118215278	C	G	119548	PNLIPRP3	+	CDS			exonic	PNLIPRP3	.	nonsynonymous SNV	PNLIPRP3:NM_001011709:exon5:c.C501G:p.H167Q	D	D	D	D	D	M	D	D	D	D	D	D	25.2	-0.321	0.936	Heyne_2018	DDDP114559		simplex			male	NA	NA	NA
157	04C34316||10_118305700_G_A	exome	NDD	autism	10_118305700_G_A	10	118305700	G	A	5406	PNLIP	+	intron			intronic	PNLIP	.	.	.	.	.	.	.	.	.	.	.	.	.	.	.	.	.	.	Satterstrom2020	04C34316	04C34316		04C33896	04C33895	Male	NA	NA	NA
158	08C75329||10_118306991_T_C	exome	NDD	autism	10_118306991_T_C	10	118306991	T	C	5406	PNLIP	+	intron			intronic	PNLIP	.	.	.	.	.	.	.	.	.	.	.	.	.	.	.	.	.	.	Satterstrom2020	08C75329	08C75329		08C75331	08C75330	Male	NA	NA	NA
159	DDDP116624||10_118313243_C_T	exome	NDD	DD	10_118313243_C_T	10	118313243	C	T	5406	PNLIP	+	CDS			exonic	PNLIP	.	nonsynonymous SNV	PNLIP:NM_000936:exon6:c.C464T:p.A155V	T	B	B	N	D	N	D	N	T	D	D	N	10.41	-0.425	0	Heyne_2018	DDDP116624		simplex			female	NA	NA	NA
160	56_de_Ligt||10_118354347_C_T	exome	NDD	ID	10_118354347_C_T	10	118354347	C	T	5407	PNLIPRP1	+	CDS			exonic	PNLIPRP1	.	stopgain	PNLIPRP1:NM_001303135:exon5:c.C436T:p.Q146X,PNLIPRP1:NM_006229:exon5:c.C436T:p.Q146X	.	.	.	N	A	.	.	.	.	.	.	D	37	0.935	0.996	Heyne_2018	56_de_Ligt		simplex			male	NA	NA	NA
161	Fam_156841||10_118368584_G_A	exome	NDD	EE	10_118368584_G_A	10	118368584	G	A	5407	PNLIPRP1	+	CDS			exonic	PNLIPRP1	.	nonsynonymous SNV	PNLIPRP1:NM_001303135:exon13:c.G1360A:p.D454N,PNLIPRP1:NM_006229:exon13:c.G1360A:p.D454N	T	B	B	N	N	L	T	N	T	T	T	N	10.92	-0.798	0.006	Heyne_2018	Fam_156841		simplex			female	NA	NA	NA
162	08C74304||10_118380839_G_A	exome	NDD	autism	10_118380839_G_A	10	118380839	G	A	5408	PNLIPRP2	+	CDS			exonic	PNLIPRP2	.	unknown	UNKNOWN	.	B	B	N	N	.	D	.	T	T	D	N	0.004	-1.415	0.03	Satterstrom2020	08C74304	08C74304		08C74302	08C74303	Male	NA	NA	NA
163	14183.p1||10_118385459_A_G	exome	NDD	autism	10_118385459_A_G	10	118385459	A	G	5408	PNLIPRP2	+	CDS			exonic	PNLIPRP2	.	unknown	UNKNOWN	.	.	.	.	.	.	.	.	.	.	.	.	.	.	.	Iossifov;Satterstrom2020	14183.p1	;14183		;14183.fa	;14183.mo	;Male	NA	NA	NA
164	NDAR_INVFG079UCJ_wes1||10_118434404_C_T	exome	NDD	autism	10_118434404_C_T	10	118434404	C	T	259217	HSPA12A	-	CDS			exonic	HSPA12A	.	nonsynonymous SNV	HSPA12A:NM_025015:exon12:c.G1916A:p.R639Q,HSPA12A:NM_001330164:exon13:c.G1967A:p.R656Q	D	D	D	D	D	M	T	N	T	T	D	D	25.9	0.935	0.661	DeRubeis2014;De_Rubeis_2014	NDAR_INVFG079UCJ_wes1	;NDAR_INVFG079UCJ_wes1		;NDAR_INVUN558UYE_wes1	;NDAR_INVCT786NEF_wes1	;Male	NA	NA	NA
165	13891.p1||10_118435880_G_A	exome	NDD	autism	10_118435880_G_A	10	118435880	G	A	259217	HSPA12A	-	intron			intronic	HSPA12A	.	.	.	.	.	.	.	.	.	.	.	.	.	.	.	.	.	.	Satterstrom2020	13891.p1	13891		SSC09583	SSC09627	Male	NA	NA	NA
166	DDDP116441||10_118439024_G_A	exome	NDD	DD	10_118439024_G_A	10	118439024	G	A	259217	HSPA12A	-	CDS			exonic	HSPA12A	.	nonsynonymous SNV	HSPA12A:NM_025015:exon10:c.C1276T:p.R426W,HSPA12A:NM_001330164:exon11:c.C1327T:p.R443W	D	D	D	D	D	L	T	D	T	T	D	D	27.6	0.136	0.955	Heyne_2018	DDDP116441		simplex			male	NA	NA	NA
167	557-04-100868||10_118460640_C_A	exome	NDD	autism	10_118460640_C_A	10	118460640	C	A	259217	HSPA12A	-	CDS			exonic	HSPA12A	.	nonsynonymous SNV	HSPA12A:NM_025015:exon4:c.G255T:p.R85S,HSPA12A:NM_001330164:exon5:c.G306T:p.R102S	D	B	B	N	D	L	T	D	T	T	.	D	23	0.07	0.997	Satterstrom2020	557-04-100868	557-04-100868		554-04-100613	553-04-100612	Male	NA	NA	NA
168	1693001||10_118466748_T_C	exome	NDD	autism	10_118466748_T_C	10	118466748	T	C	259217	HSPA12A	-	CDS||5'UTR			exonic	HSPA12A	.	nonsynonymous SNV	HSPA12A:NM_025015:exon2:c.A89G:p.D30G,HSPA12A:NM_001330164:exon3:c.A140G:p.D47G	D	B	B	D	D	L	T	N	T	T	T	D	24.8	0.964	1	Satterstrom2020	1693001	1693001		1693011	1693012	Male	NA	NA	NA
169	DDDP100208||10_118466781_G_A	exome	NDD	DD	10_118466781_G_A	10	118466781	G	A	259217	HSPA12A	-	CDS||5'UTR			exonic	HSPA12A	.	nonsynonymous SNV	HSPA12A:NM_025015:exon2:c.C56T:p.S19F,HSPA12A:NM_001330164:exon3:c.C107T:p.S36F	D	B	B	D	D	L	T	N	T	T	T	D	29.1	0.953	1	Heyne_2018	DDDP100208		simplex			female	NA	NA	NA
170	12706.s1||10_118764522_G_A	exome	control	control	10_118764522_G_A	10	118764522	G	A	57698	KIAA1598	-	intron			intronic	SHTN1	.	.	.	.	.	.	.	.	.	.	.	.	.	.	.	.	.	.	Satterstrom2020	12706.s1	12706		SSC06261	SSC06251	Female	NA	NA	NA
171	NDAR_INVXP194LCA_wes1||10_119768600_T_A	exome	NDD	autism	10_119768600_T_A	10	119768600	T	A	22841	RAB11FIP2	-	CDS			exonic	RAB11FIP2	.	nonsynonymous SNV	RAB11FIP2:NM_014904:exon5:c.A1448T:p.N483I,RAB11FIP2:NM_001330167:exon6:c.A1508T:p.N503I	D	D	D	D	D	L	T	D	T	T	D	D	32	1.011	1	DeRubeis2014;De_Rubeis_2014	NDAR_INVXP194LCA_wes1	;NDAR_INVXP194LCA_wes1		;NDAR_INVEW014HEH_wes1	;NDAR_INVUV985VVQ_wes1	;Male	NA	NA	NA
172	004-05-102519||10_11978573_T_A	exome	NDD	autism	10_11978573_T_A	10	11978573	T	A	26019	UPF2	-	CDS			exonic	UPF2	.	nonsynonymous SNV	UPF2:NM_015542:exon19:c.A3517T:p.M1173L,UPF2:NM_080599:exon19:c.A3517T:p.M1173L	T	B	P	D	D	N	T	N	T	T	T	N	23.4	1.058	1	Satterstrom2020	004-05-102519	004-05-102519		710-04-102517	709-04-102514	Female	NA	NA	NA
173	F9995-1||10_120801884_G_A	exome	NDD	autism	10_120801884_G_A	10	120801884	G	A	8661	EIF3A	-	CDS			exonic	EIF3A	.	stopgain	EIF3A:NM_003750:exon19:c.C3148T:p.R1050X	.	.	.	N	A	.	.	.	.	.	.	D	40	1.048	0.89	Satterstrom2020	F9995-1	F9995-1		F9995-3	F9995-2	Male	NA	NA	NA
174	11441.s1||10_120818850_A_G	exome	control	control	10_120818850_A_G	10	120818850	A	G	8661	EIF3A	-	CDS			exonic	EIF3A	.	synonymous SNV	EIF3A:NM_003750:exon11:c.T1503C:p.T501T	.	.	.	.	.	.	.	.	.	.	.	.	.	.	.	Iossifov;Satterstrom2020	11441.s1	;11441		;SSC00596	;SSC00594	;Male	NA	NA	NA
175	AU134A||10_120832478_C_T	exome	NDD	autism	10_120832478_C_T	10	120832478	C	T	8661	EIF3A	-	CDS			exonic	EIF3A	.	synonymous SNV	EIF3A:NM_003750:exon4:c.G465A:p.E155E	.	.	.	.	.	.	.	.	.	.	.	.	.	.	.	Satterstrom2020	AU134A	AU134A		AU134B	AU134C	Female	NA	NA	NA
176	12011.p1||10_120877119_G_A	exome	NDD	autism	10_120877119_G_A	10	120877119	G	A	404636	FAM45A	+	CDS			exonic	FAM45A	.	nonsynonymous SNV	FAM45A:NM_001303112:exon4:c.G202A:p.G68S,FAM45A:NM_207009:exon4:c.G421A:p.G141S,FAM45A:NM_001303111:exon5:c.G397A:p.G133S	T	D	D	D	D	M	.	D	T	T	T	D	28.2	0.967	1	SSC_Iossifov_2014	12011.p1	12011		12011.fa	12011.mo	Male	NA	NA	NA
177	13850.p1||10_120933327_G_A	exome	NDD	autism	10_120933327_G_A	10	120933327	G	A	10935	PRDX3	-	CDS			exonic	PRDX3	.	synonymous SNV	PRDX3:NM_001302272:exon4:c.C369T:p.H123H,PRDX3:NM_006793:exon4:c.C369T:p.H123H	.	.	.	.	.	.	.	.	.	.	.	.	.	.	.	Iossifov;Satterstrom2020	13850.p1	;13850		;13850.fa	;13850.mo	;Female	NA	NA	NA
178	DDDP116084||10_121140437_G_A	exome	NDD	DD	10_121140437_G_A	10	121140437	G	A	2869	GRK5	+	CDS||5'UTR			exonic	GRK5	.	nonsynonymous SNV	GRK5:NM_005308:exon3:c.G259A:p.V87M	T	D	P	N	D	L	T	N	T	T	T	D	23.2	0.953	0.984	Heyne_2018	DDDP116084		simplex			female	NA	NA	NA
179	DDDP106492||10_121182759_C_T	exome	NDD	DD	10_121182759_C_T	10	121182759	C	T	2869	GRK5	+	CDS			exonic	GRK5	.	nonsynonymous SNV	GRK5:NM_005308:exon5:c.C421T:p.L141F	D	D	P	N	D	M	T	D	T	T	T	D	24.9	0.04	0.927	Heyne_2018	DDDP106492		simplex			male	NA	NA	NA
180	11374.s1||10_121201577_G_A	exome	control	control	10_121201577_G_A	10	121201577	G	A	2869	GRK5	+	CDS			exonic	GRK5	.	nonsynonymous SNV	GRK5:NM_005308:exon11:c.G1034A:p.R345Q	D	D	D	D	D	N	T	D	T	T	T	D	35	1.044	1	Satterstrom2020	11374.s1	11374		SSC01015	SSC01016	Female	NA	NA	NA
181	CC1123.202||10_121203193_C_T	exome	NDD	autism	10_121203193_C_T	10	121203193	C	T	2869	GRK5	+	CDS			exonic	GRK5	.	nonsynonymous SNV	GRK5:NM_005308:exon12:c.C1195T:p.R399C	D	D	P	D	D	M	T	D	T	T	D	D	26.9	0.931	1	Satterstrom2020	CC1123.202	CC1123		CC1123.102	CC1123.101	Male	NA	NA	NA
182	de||10_12123503_T_C	exome	NDD	EE	10_12123503_T_C	10	12123503	T	C	55526	DHTKD1	+	CDS			exonic	DHTKD1	.	nonsynonymous SNV	DHTKD1:NM_018706:exon2:c.T187C:p.Y63H	D	D	D	D	D	H	T	D	T	T	T	D	23.6	1.061	0.174	Heyne_2018	de		simplex			female	NA	NA	NA
183	280-04-101007||10_12133558_C_T	exome	NDD	autism	10_12133558_C_T	10	12133558	C	T	55526	DHTKD1	+	CDS			exonic	DHTKD1	.	nonsynonymous SNV	DHTKD1:NM_018706:exon6:c.C1034T:p.T345I	D	D	D	D	D	M	T	D	D	D	D	D	26.8	0.935	0.848	Satterstrom2020	280-04-101007	280-04-101007		277-04-101004	266-04-100930	Male	NA	NA	NA
184	12090.p1||10_121336635_T_C	exome	NDD	autism	10_121336635_T_C	10	121336635	T	C	7073	TIAL1	-	CDS			exonic	TIAL1	.	nonsynonymous SNV	TIAL1:NM_001033925:exon10:c.A869G:p.Y290C,TIAL1:NM_003252:exon10:c.A818G:p.Y273C,TIAL1:NM_001323964:exon11:c.A449G:p.Y150C,TIAL1:NM_001323965:exon11:c.A449G:p.Y150C,TIAL1:NM_001323967:exon11:c.A449G:p.Y150C,TIAL1:NM_001323968:exon11:c.A752G:p.Y251C,TIAL1:NM_001323969:exon11:c.A701G:p.Y234C,TIAL1:NM_001323970:exon11:c.A752G:p.Y251C	D	D	P	D	D	L	T	D	T	T	T	D	24.9	1.011	1	Iossifov;Satterstrom2020	12090.p1	;12090		;35900	;35902	;Female	NA	NA	NA
185	F9958-1||10_121338389_T_C	exome	NDD	autism	10_121338389_T_C	10	121338389	T	C	7073	TIAL1	-	intron			intronic	TIAL1	.	.	.	.	.	.	.	.	.	.	.	.	.	.	.	.	.	.	Satterstrom2020	F9958-1	F9958-1		F9958-3	F9958-2	Male	NA	NA	NA
186	DDDP110895||10_121411273_A_G	exome	NDD	DD	10_121411273_A_G	10	121411273	A	G	9531	BAG3	+	CDS			exonic	BAG3	.	nonsynonymous SNV	BAG3:NM_004281:exon1:c.A86G:p.K29R	T	D	D	D	D	N	T	N	T	T	D	D	27.5	1.024	0.999	Heyne_2018	DDDP110895		simplex			female	NA	NA	NA
187	DDDP117448||10_121429609_G_C	exome	NDD	DD	10_121429609_G_C	10	121429609	G	C	9531	BAG3	+	CDS			exonic	BAG3	.	nonsynonymous SNV	BAG3:NM_004281:exon2:c.G427C:p.E143Q	D	B	B	D	D	L	T	N	T	T	D	D	25.9	1.048	0.805	Heyne_2018	DDDP117448		simplex			male	NA	NA	NA
188	12469.s1||10_121429632_G_A	exome	control	control	10_121429632_G_A	10	121429632	G	A	9531	BAG3	+	CDS			exonic	BAG3	.	synonymous SNV	BAG3:NM_004281:exon2:c.G450A:p.Q150Q	.	.	.	.	.	.	.	.	.	.	.	.	.	.	.	Iossifov;SSC_Iossifov_2014	12469.s1	;12469		;12469.fa	;12469.mo	;Female	NA	NA	NA
189	DDDP103596||10_121431904_C_A	exome	NDD	DD	10_121431904_C_A	10	121431904	C	A	9531	BAG3	+	CDS			exonic	BAG3	.	nonsynonymous SNV	BAG3:NM_004281:exon3:c.C645A:p.N215K	D	P	P	N	N	M	T	N	T	T	D	N	23.6	-0.633	0.703	Heyne_2018	DDDP103596		simplex			male	NA	NA	NA
190	DEASD_1045_001||10_121591510_C_T	exome	NDD	autism	10_121591510_C_T	10	121591510	C	T	79892	MCMBP	-	intron			intronic	MCMBP	.	.	.	.	.	.	.	.	.	.	.	.	.	.	.	.	.	.	Satterstrom2020	DEASD_1045_001	DEASD_1045_001		DEASD_1045_500	DEASD_1045_600	Male	NA	NA	NA
191	08C76581||10_121598233_G_C	exome	NDD	autism	10_121598233_G_C	10	121598233	G	C	79892	MCMBP	-	intron			intronic	MCMBP	.	.	.	.	.	.	.	.	.	.	.	.	.	.	.	.	.	.	Satterstrom2020	08C76581	08C76581		08C76583	08C76582	Male	NA	NA	NA
192	056-11-113480||10_121663551_A_G	exome	NDD	autism	10_121663551_A_G	10	121663551	A	G	11196	SEC23IP	+	intron			intronic	SEC23IP	.	.	.	.	.	.	.	.	.	.	.	.	.	.	.	.	.	.	Satterstrom2020	056-11-113480	056-11-113480		058-11-113482	057-11-113481	Male	NA	NA	NA
193	EGAN00001101319||10_121675295_C_T	exome	NDD	autism	10_121675295_C_T	10	121675295	C	T	11196	SEC23IP	+	CDS			exonic	SEC23IP	.	nonsynonymous SNV	SEC23IP:NM_007190:exon8:c.C1438T:p.R480W	D	D	P	D	N	N	T	D	T	T	T	D	29.8	0.935	0.998	Satterstrom2020	EGAN00001101319	EGAN00001101319		EGAN00001101099	EGAN00001101101	Male	NA	NA	NA
194	11846.p1||10_121678027_C_T	exome	NDD	autism	10_121678027_C_T	10	121678027	C	T	11196	SEC23IP	+	intron			intronic	SEC23IP	.	.	.	.	.	.	.	.	.	.	.	.	.	.	.	.	.	.	Iossifov;Satterstrom2020	11846.p1	;11846		;SSC02947	;SSC02841	;Male	NA	NA	NA
195	10C107587||10_12198868_C_T	exome	NDD	autism	10_12198868_C_T	10	12198868	C	T	55176	SEC61A2	+	intron			intronic	SEC61A2	.	.	.	.	.	.	.	.	.	.	.	.	.	.	.	.	.	.	Satterstrom2020	10C107587	10C107587		10C107586	10C107585	Male	NA	NA	NA
196	13396.s1||10_12257793_G_A	exome	control	control	10_12257793_G_A	10	12257793	G	A	8872	CDC123	+	CDS			exonic	CDC123	.	nonsynonymous SNV	CDC123:NM_006023:exon5:c.G292A:p.G98R	D	D	D	D	D	M	.	D	D	D	D	D	29	0.953	1	Iossifov;Satterstrom2020	13396.s1	;13396		;SSC07833	;SSC07828	;Female	NA	NA	NA
197	05C49685||10_122660633_G_C	exome	NDD	autism	10_122660633_G_C	10	122660633	G	C	100847064	MIR5694	+	intron			intronic	WDR11	.	.	.	.	.	.	.	.	.	.	.	.	.	.	.	.	.	.	Satterstrom2020	05C49685	05C49685		05C49687	05C49688	Male	NA	NA	NA
198	14044.s1||10_1230961_G_T	exome	control	control	10_1230961_G_T	10	1230961	G	T	105	ADARB2	-	CDS||5'UTR			exonic	ADARB2	.	nonsynonymous SNV	ADARB2:NM_018702:exon9:c.C1883A:p.A628E	T	B	B	N	N	M	D	D	D	D	D	N	16.88	-0.251	0	Krumm;Satterstrom2020	14044.s1	;14044		;SSC09607	;SSC09595	;Female	NA	NA	NA
199	DDDP102213||10_123260357_G_A	exome	NDD	DD	10_123260357_G_A	10	123260357	G	A	2263	FGFR2	-	CDS			exonic	FGFR2	.	nonsynonymous SNV	FGFR2:NM_001144914:exon8:c.C1208T:p.A403V,FGFR2:NM_001144916:exon8:c.C1199T:p.A400V,FGFR2:NM_001144917:exon9:c.C1196T:p.A399V,FGFR2:NM_001144918:exon9:c.C1193T:p.A398V,FGFR2:NM_023029:exon9:c.C1277T:p.A426V,FGFR2:NM_001144913:exon10:c.C1547T:p.A516V,FGFR2:NM_001144915:exon10:c.C1277T:p.A426V,FGFR2:NM_001144919:exon10:c.C1280T:p.A427V,FGFR2:NM_001320654:exon10:c.C860T:p.A287V,FGFR2:NM_000141:exon1…	D	D	D	D	D	M	D	D	D	D	D	D	33	1.048	0.978	Heyne_2018	DDDP102213		simplex			female	NA	NA	NA
200	13843.s1||10_123263506_G_C	exome	control	control	10_123263506_G_C	10	123263506	G	C	2263	FGFR2	-	intron			intronic	FGFR2	.	.	.	.	.	.	.	.	.	.	.	.	.	.	.	.	.	.	Satterstrom2020	13843.s1	13843		13843.fa	13843.mo	Female	NA	NA	NA
201	NDAR_INVHB587BPE_wes1||10_123298088_G_A	exome	NDD	autism	10_123298088_G_A	10	123298088	G	A	2263	FGFR2	-	CDS			intronic	FGFR2	.	.	.	.	.	.	.	.	.	.	.	.	.	.	.	.	.	.	De_Rubeis_2014	NDAR_INVHB587BPE_wes1	NDAR_INVHB587BPE_wes1		NDAR_INVWX120HE6_wes1	NDAR_INVYB376ZW8_wes1	Male	NA	NA	NA
202	EGAN00001101020||10_1233756_T_G	exome	NDD	autism	10_1233756_T_G	10	1233756	T	G	105	ADARB2	-	exon_unclassified			intronic	ADARB2	.	.	.	.	.	.	.	.	.	.	.	.	.	.	.	.	.	.	Satterstrom2020	EGAN00001101020	EGAN00001101020		EGAN00001101201	EGAN00001101416	Male	NA	NA	NA
203	11959.s1||10_123600736_A_G	exome	control	control	10_123600736_A_G	10	123600736	A	G	11101	ATE1	-	CDS			exonic	ATE1	.	nonsynonymous SNV	ATE1:NM_001288735:exon7:c.T730C:p.F244L,ATE1:NM_001288734:exon8:c.T673C:p.F225L,ATE1:NM_001001976:exon9:c.T1018C:p.F340L,ATE1:NM_001288736:exon9:c.T997C:p.F333L,ATE1:NM_007041:exon9:c.T1018C:p.F340L	D	D	D	D	D	M	.	D	T	T	D	D	32	1.199	0.999	Satterstrom2020	11959.s1	11959		5837	5869	Female	NA	NA	NA
204	DDDP111942||10_123970667_G_A	exome	NDD	DD	10_123970667_G_A	10	123970667	G	A	10579	TACC2	+	CDS||5'UTR			exonic	TACC2	.	nonsynonymous SNV	TACC2:NM_001291878:exon3:c.G961A:p.G321R,TACC2:NM_006997:exon3:c.G961A:p.G321R,TACC2:NM_206860:exon3:c.G961A:p.G321R,TACC2:NM_206861:exon6:c.G1165A:p.G389R,TACC2:NM_001291876:exon8:c.G6592A:p.G2198R,TACC2:NM_001291877:exon8:c.G6739A:p.G2247R,TACC2:NM_206862:exon9:c.G6727A:p.G2243R	T	P	B	N	N	N	T	N	T	T	T	N	7.981	1.048	0.403	Heyne_2018	DDDP111942		simplex			female	NA	NA	NA
205	14203.s1||10_123985965_C_T	exome	control	control	10_123985965_C_T	10	123985965	C	T	10579	TACC2	+	CDS			exonic	TACC2	.	nonsynonymous SNV	TACC2:NM_006997:exon7:c.C1927T:p.R643C,TACC2:NM_206860:exon7:c.C1927T:p.R643C,TACC2:NM_001291878:exon8:c.C1963T:p.R655C,TACC2:NM_001291879:exon9:c.C805T:p.R269C,TACC2:NM_206861:exon10:c.C2131T:p.R711C,TACC2:NM_001291876:exon12:c.C7558T:p.R2520C,TACC2:NM_001291877:exon12:c.C7705T:p.R2569C,TACC2:NM_206862:exon13:c.C7693T:p.R2565C	D	D	P	N	N	M	T	D	T	T	T	D	23	-0.348	0.026	Iossifov;Satterstrom2020	14203.s1	;14203		;37357	;37359	;Male	NA	NA	NA
206	AU149A||10_124183733_G_T	exome	NDD	autism	10_124183733_G_T	10	124183733	G	T	59338	PLEKHA1	+	CDS			exonic	PLEKHA1	.	nonsynonymous SNV	PLEKHA1:NM_001001974:exon9:c.G700T:p.V234L,PLEKHA1:NM_021622:exon9:c.G700T:p.V234L,PLEKHA1:NM_001195608:exon10:c.G700T:p.V234L,PLEKHA1:NM_001330178:exon10:c.G700T:p.V234L	T	B	B	N	N	L	T	N	T	T	T	D	14.63	1.048	0.973	DeRubeis2014;Satterstrom2020	AU149A	;AU149A		;AU149B	;AU149C	;Male	NA	NA	NA
207	08C77439||10_124350222_G_A	exome	NDD	autism	10_124350222_G_A	10	124350222	G	A	1755	DMBT1	+	intron			intronic	DMBT1	.	.	.	.	.	.	.	.	.	.	.	.	.	.	.	.	.	.	Satterstrom2020	08C77439	08C77439		08C77441	08C77440	Male	NA	NA	NA
208	04C30575||10_124351014_G_A	exome	NDD	autism	10_124351014_G_A	10	124351014	G	A	1755	DMBT1	+	CDS			exonic	DMBT1	.	synonymous SNV	DMBT1:NM_017579:exon18:c.G2127A:p.T709T,DMBT1:NM_001320644:exon19:c.G2157A:p.T719T,DMBT1:NM_007329:exon19:c.G2157A:p.T719T	.	.	.	.	.	.	.	.	.	.	.	.	.	.	.	Satterstrom2020	04C30575	04C30575		04C31194	04C30574	Male	NA	NA	NA
209	DDDP104274||10_124376760_T_A	exome	NDD	DD	10_124376760_T_A	10	124376760	T	A	1755	DMBT1	+	CDS			exonic	DMBT1	.	synonymous SNV	DMBT1:NM_004406:exon24:c.T2604A:p.S868S,DMBT1:NM_017579:exon36:c.T4458A:p.S1486S,DMBT1:NM_001320644:exon37:c.T4488A:p.S1496S,DMBT1:NM_007329:exon37:c.T4488A:p.S1496S	.	.	.	.	.	.	.	.	.	.	.	.	.	.	.	Heyne_2018	DDDP104274		simplex			female	NA	NA	NA
210	DDDP100402||10_124384821_T_C	exome	NDD	DD	10_124384821_T_C	10	124384821	T	C	1755	DMBT1	+	intron			splicing	DMBT1	NM_001320644:exon42:c.5248+2T>C;NM_007329:exon42:c.5248+2T>C;NM_017579:exon41:c.5218+2T>C;NM_004406:exon29:c.3364+2T>C	.	.	.	.	.	.	D	.	.	.	.	.	.	D	19.63	1.061	0.449	Heyne_2018	DDDP100402		simplex			male	NA	NA	NA
211	IGM1021||10_124399829_G_A	exome	NDD	autism	10_124399829_G_A	10	124399829	G	A	1755	DMBT1	+	CDS			exonic	DMBT1	.	nonsynonymous SNV	DMBT1:NM_004406:exon39:c.G4945A:p.D1649N,DMBT1:NM_017579:exon51:c.G6799A:p.D2267N,DMBT1:NM_001320644:exon52:c.G6826A:p.D2276N,DMBT1:NM_007329:exon52:c.G6829A:p.D2277N	T	B	B	U	N	M	D	N	T	T	D	N	16.41	0.139	0.921	Satterstrom2020	IGM1021	IGM1021		IGM1021F	IGM1021M	Male	NA	NA	NA
212	09C81606||10_124402602_C_T	exome	NDD	autism	10_124402602_C_T	10	124402602	C	T	1755	DMBT1	+	intron			intronic	DMBT1	.	.	.	.	.	.	.	.	.	.	.	.	.	.	.	.	.	.	Satterstrom2020	09C81606	09C81606		09C81597	09C81598	Male	NA	NA	NA
213	DDDP116657||10_124793986_C_T	exome	NDD	DD	10_124793986_C_T	10	124793986	C	T	36	ACADSB	+	CDS||5'UTR			exonic	ACADSB	.	nonsynonymous SNV	ACADSB:NM_001609:exon2:c.C157T:p.P53S	T	P	B	D	D	M	D	D	D	D	D	D	21	0.032	0.012	Heyne_2018	DDDP116657		simplex			male	NA	NA	NA
214	DDDP112213||10_125426329_A_G	exome	NDD	DD	10_125426329_A_G	10	125426329	A	G	2849	GPR26	+	CDS			exonic	GPR26	.	nonsynonymous SNV	GPR26:NM_153442:exon1:c.A406G:p.T136A	T	B	B	N	N	N	T	N	T	T	T	N	0.003	-0.135	0.992	Heyne_2018	DDDP112213		simplex			male	NA	NA	NA
215	045-06-105599||10_125528006_C_A	exome	NDD	autism	10_125528006_C_A	10	125528006	C	A	119587	CPXM2	-	exon_unclassified			intronic	CPXM2	.	.	.	.	.	.	.	.	.	.	.	.	.	.	.	.	.	.	Satterstrom2020	045-06-105599	045-06-105599		015-08-108847	046-06-105602	Male	NA	NA	NA
216	02C10130||10_125558602_G_C	exome	NDD	autism	10_125558602_G_C	10	125558602	G	C	119587	CPXM2	-	intron			intronic	CPXM2	.	.	.	.	.	.	.	.	.	.	.	.	.	.	.	.	.	.	Satterstrom2020	02C10130	02C10130		02C10062	02C10063	Female	NA	NA	NA
217	10C117563||10_12595287_G_A	exome	NDD	autism	10_12595287_G_A	10	12595287	G	A	57118	CAMK1D	+	CDS			exonic	CAMK1D	.	synonymous SNV	CAMK1D:NM_020397:exon2:c.G156A:p.K52K,CAMK1D:NM_153498:exon2:c.G156A:p.K52K	.	.	.	.	.	.	.	.	.	.	.	.	.	.	.	DeRubeis2014;Satterstrom2020	10C117563	;10C117563		;10C117562	;10C117561	;Male	NA	NA	NA
218	AU130A||10_12595343_C_A	exome	NDD	autism	10_12595343_C_A	10	12595343	C	A	57118	CAMK1D	+	CDS			exonic	CAMK1D	.	nonsynonymous SNV	CAMK1D:NM_020397:exon2:c.C212A:p.A71D,CAMK1D:NM_153498:exon2:c.C212A:p.A71D	T	B	B	N	D	N	T	D	T	T	D	D	23.3	0.852	0.733	DeRubeis2014;Satterstrom2020	AU130A	;AU130A		;AU130B	;AU130C	;Male	NA	NA	NA
219	452||10_126097492_A_T	exome	NDD	ID	10_126097492_A_T	10	126097492	A	T	4942	OAT	-	CDS||5'UTR			exonic	OAT	.	nonsynonymous SNV	OAT:NM_000274:exon3:c.T242A:p.F81Y,OAT:NM_001322965:exon3:c.T242A:p.F81Y,OAT:NM_001322966:exon4:c.T242A:p.F81Y,OAT:NM_001322967:exon4:c.T242A:p.F81Y,OAT:NM_001322969:exon4:c.T242A:p.F81Y,OAT:NM_001322968:exon5:c.T242A:p.F81Y,OAT:NM_001322970:exon5:c.T242A:p.F81Y	D	B	P	D	D	M	D	N	D	D	D	D	25.8	1.199	1	Heyne_2018	452		simplex			male	NA	NA	NA
220	Lelieveld_452||10_126097492_A_T	exome	NDD	ID	10_126097492_A_T	10	126097492	A	T	4942	OAT	-	CDS||5'UTR			exonic	OAT	.	nonsynonymous SNV	OAT:NM_000274:exon3:c.T242A:p.F81Y,OAT:NM_001322965:exon3:c.T242A:p.F81Y,OAT:NM_001322966:exon4:c.T242A:p.F81Y,OAT:NM_001322967:exon4:c.T242A:p.F81Y,OAT:NM_001322969:exon4:c.T242A:p.F81Y,OAT:NM_001322968:exon5:c.T242A:p.F81Y,OAT:NM_001322970:exon5:c.T242A:p.F81Y	D	B	P	D	D	M	D	N	D	D	D	D	25.8	1.199	1	Lelieveld2016	Lelieveld_452						NA	NA	NA
221	200675425@1082034452||10_126100537_C_T	exome	NDD	autism	10_126100537_C_T	10	126100537	C	T	4942	OAT	-	intron			intronic	OAT	.	.	.	.	.	.	.	.	.	.	.	.	.	.	.	.	.	.	Satterstrom2020	200675425@1082034452	200675425@1082034452		200675423@1082034605	200675424@1082034687	Male	NA	NA	NA
222	DDDP113478||10_126136203_C_T	exome	NDD	DD	10_126136203_C_T	10	126136203	C	T	390010	NKX1-2	-	CDS	Simple_repeat	1	exonic	NKX1-2	.	nonsynonymous SNV	NKX1-2:NM_001146340:exon2:c.G728A:p.G243D	D	P	B	.	N	L	D	N	T	T	D	N	15.62	-0.603	0	Heyne_2018	DDDP113478		simplex			female	NA	NA	NA
223	DDDP107964||10_126631792_G_A	exome	NDD	DD	10_126631792_G_A	10	126631792	G	A	54764	ZRANB1	+	CDS			exonic	ZRANB1	.	nonsynonymous SNV	ZRANB1:NM_017580:exon1:c.G730A:p.E244K	T	B	B	D	D	L	T	N	T	T	T	D	17.64	0.953	1	Heyne_2018	DDDP107964		simplex			male	NA	NA	NA
224	DDDP105476||10_126662852_C_T	exome	NDD	DD	10_126662852_C_T	10	126662852	C	T	54764	ZRANB1	+	CDS			exonic	ZRANB1	.	nonsynonymous SNV	ZRANB1:NM_017580:exon5:c.C1312T:p.R438W	D	D	D	D	D	M	T	D	T	T	T	D	35	0.935	1	Heyne_2018	DDDP105476		simplex			female	NA	NA	NA
225	DDDP102256||10_126662892_C_T	exome	NDD	DD	10_126662892_C_T	10	126662892	C	T	54764	ZRANB1	+	CDS			exonic	ZRANB1	.	nonsynonymous SNV	ZRANB1:NM_017580:exon5:c.C1352T:p.A451V	D	D	D	D	D	M	T	D	T	T	T	D	33	0.935	1	Heyne_2018	DDDP102256		simplex			female	NA	NA	NA
226	13290.p1||10_126681802_T_C	exome	NDD	autism	10_126681802_T_C	10	126681802	T	C	1488	CTBP2	-	CDS			exonic	CTBP2	.	synonymous SNV	CTBP2:NM_022802:exon7:c.A2628G:p.A876A,CTBP2:NM_001321013:exon8:c.A1008G:p.A336A,CTBP2:NM_001083914:exon9:c.A1008G:p.A336A,CTBP2:NM_001290214:exon9:c.A1008G:p.A336A,CTBP2:NM_001290215:exon9:c.A1008G:p.A336A,CTBP2:NM_001321012:exon9:c.A1008G:p.A336A,CTBP2:NM_001321014:exon9:c.A1008G:p.A336A,CTBP2:NM_001329:exon9:c.A1008G:p.A336A	.	.	.	.	.	.	.	.	.	.	.	.	.	.	.	Satterstrom2020	13290.p1	13290		13290.fa	13290.mo	Male	NA	NA	NA
227	DDDP111374||10_126686654_C_T	exome	NDD	DD	10_126686654_C_T	10	126686654	C	T	1488	CTBP2	-	CDS			exonic	CTBP2	.	synonymous SNV	CTBP2:NM_022802:exon4:c.G2064A:p.R688R,CTBP2:NM_001321013:exon5:c.G444A:p.R148R,CTBP2:NM_001083914:exon6:c.G444A:p.R148R,CTBP2:NM_001290214:exon6:c.G444A:p.R148R,CTBP2:NM_001290215:exon6:c.G444A:p.R148R,CTBP2:NM_001321012:exon6:c.G444A:p.R148R,CTBP2:NM_001321014:exon6:c.G444A:p.R148R,CTBP2:NM_001329:exon6:c.G444A:p.R148R	.	.	.	.	.	.	.	.	.	.	.	.	.	.	.	Heyne_2018	DDDP111374		simplex			male	NA	NA	NA
228	475||10_126715518_C_T	exome	NDD	ID	10_126715518_C_T	10	126715518	C	T	1488	CTBP2	-	CDS			exonic	CTBP2	.	nonsynonymous SNV	CTBP2:NM_022802:exon1:c.G811A:p.E271K	D	P	B	N	D	.	D	N	D	T	D	N	17.06	0.848	0.017	Heyne_2018	475		simplex			male	NA	NA	NA
229	Lelieveld_475||10_126715518_C_T	exome	NDD	ID	10_126715518_C_T	10	126715518	C	T	1488	CTBP2	-	CDS			exonic	CTBP2	.	nonsynonymous SNV	CTBP2:NM_022802:exon1:c.G811A:p.E271K	D	P	B	N	D	.	D	N	D	T	D	N	17.06	0.848	0.017	Lelieveld2016	Lelieveld_475						NA	NA	NA
230	G01-GEA-97-HI||10_126727639_G_C	exome	NDD	autism	10_126727639_G_C	10	126727639	G	C	1488	CTBP2	-	5'UTR			UTR5	CTBP2	NM_001321012:c.-16C>G;NM_001321014:c.-16C>G;NM_001321013:c.-16C>G;NM_001329:c.-16C>G;NM_001290215:c.-16C>G;NM_001290214:c.-16C>G;NM_001083914:c.-16C>G	.	.	.	.	.	.	.	.	.	.	.	.	.	.	.	.	.	Satterstrom2020	G01-GEA-97-HI	G01-GEA-97-HI		G01-GEA-97-PA	G01-GEA-97-MA	Male	NA	NA	NA
231	13686.p1||10_127409846_G_A	exome	NDD	autism	10_127409846_G_A	10	127409846	G	A	26098	C10orf137	+	CDS||5'UTR			exonic	EDRF1	.	nonsynonymous SNV	EDRF1:NM_001202438:exon2:c.G182A:p.R61Q,EDRF1:NM_015608:exon2:c.G182A:p.R61Q	T	B	B	N	D	N	.	N	T	T	T	N	23.3	0.953	1	Iossifov;Satterstrom2020	13686.p1	;13686		;SSC09030	;SSC09029	;Female	NA	NA	NA
232	14207.p1||10_127417959_A_G	exome	NDD	ASD;autism	10_127417959_A_G	10	127417959	A	G	26098	C10orf137	+	CDS			exonic	EDRF1	.	synonymous SNV	EDRF1:NM_015608:exon7:c.A825G:p.L275L,EDRF1:NM_001202438:exon8:c.A927G:p.L309L	.	.	.	.	.	.	.	.	.	.	.	.	.	.	.	Heyne_2018;Satterstrom2020	14207.p1	;14207	simplex;	;14207.fa	;14207.mo	female;Female	NA	NA	NA
233	352|Lelieveld_352||10_127424241_C_G	exome	NDD	ID;ID	10_127424241_C_G	10	127424241	C	G	26098	C10orf137	+	CDS			exonic	EDRF1	.	stopgain	EDRF1:NM_015608:exon12:c.C1424G:p.S475X,EDRF1:NM_001202438:exon13:c.C1526G:p.S509X	.	.	.	D	A	.	.	.	.	.	.	D	39	0.852	1	Heyne_2018;Lelieveld2016	352|Lelieveld_352		simplex;			male;	NA	NA	NA
234	DDDP112618||10_127431659_T_A	exome	NDD	DD	10_127431659_T_A	10	127431659	T	A	26098	C10orf137	+	CDS			exonic	EDRF1	.	nonsynonymous SNV	EDRF1:NM_015608:exon17:c.T2302A:p.L768I,EDRF1:NM_001202438:exon18:c.T2404A:p.L802I	T	P	P	D	D	L	.	N	T	T	T	D	23.5	0.964	1	Heyne_2018	DDDP112618		simplex			female	NA	NA	NA
235	641||10_127459071_A_G	exome	NDD	ID	10_127459071_A_G	10	127459071	A	G	118856	MMP21	-	CDS			exonic	MMP21	.	nonsynonymous SNV	MMP21:NM_147191:exon5:c.T1069C:p.Y357H	D	D	D	D	D	M	T	D	T	T	T	D	27.7	1.194	0.972	Heyne_2018	641		simplex			female	NA	NA	NA
236	Lelieveld_641||10_127459071_A_G	exome	NDD	ID	10_127459071_A_G	10	127459071	A	G	118856	MMP21	-	CDS			exonic	MMP21	.	nonsynonymous SNV	MMP21:NM_147191:exon5:c.T1069C:p.Y357H	D	D	D	D	D	M	T	D	T	T	T	D	27.7	1.194	0.972	Lelieveld2016	Lelieveld_641						NA	NA	NA
237	NDAR_INVNT563VL9_wes1||10_127461301_G_A	exome	NDD	autism	10_127461301_G_A	10	127461301	G	A	118856	MMP21	-	CDS			exonic	MMP21	.	nonsynonymous SNV	MMP21:NM_147191:exon3:c.C716T:p.P239L	T	B	B	N	N	L	T	D	T	T	T	N	23	1.048	0.725	DeRubeis2014;De_Rubeis_2014	NDAR_INVNT563VL9_wes1	;NDAR_INVNT563VL9_wes1		;NDAR_INVWY979HF6_wes1	;NDAR_INVGP109DM4_wes1	;Female	NA	NA	NA
238	11401.p1||10_127520001_G_T	exome	NDD	autism	10_127520001_G_T	10	127520001	G	T	56647	BCCIP	+	CDS			exonic	BCCIP	.	nonsynonymous SNV	BCCIP:NM_016567:exon5:c.G424T:p.V142F,BCCIP:NM_078468:exon5:c.G424T:p.V142F,BCCIP:NM_078469:exon5:c.G424T:p.V142F	D	P	P	N	N	L	T	D	T	T	D	D	28.2	1.048	0.986	Iossifov;Satterstrom2020	11401.p1	;11401		;SSC02443	;SSC02261	;Male	NA	NA	NA
239	DDDP111682||10_127527592_A_G	exome	NDD	DD	10_127527592_A_G	10	127527592	A	G	55760	DHX32	-	CDS			exonic	DHX32	.	nonsynonymous SNV	DHX32:NM_018180:exon9:c.T1859C:p.L620P	D	D	D	D	D	M	T	D	T	T	D	D	31	1.199	0.989	Heyne_2018	DDDP111682		simplex			female	NA	NA	NA
240	12012P||10_127548338_T_C	exome	NDD	cerebral_palsy	10_127548338_T_C	10	127548338	T	C	55760	DHX32	-	CDS			exonic	DHX32	.	nonsynonymous SNV	DHX32:NM_018180:exon3:c.A683G:p.Y228C	D	P	P	D	N	M	T	D	T	T	T	D	24.5	1.061	0.999	McMichael2015	12012P						NA	NA	NA
241	08C75173||10_127555550_C_T	exome	NDD	autism	10_127555550_C_T	10	127555550	C	T	55760	DHX32	-	intron			intronic	DHX32	.	.	.	.	.	.	.	.	.	.	.	.	.	.	.	.	.	.	Satterstrom2020	08C75173	08C75173		08C75175	08C75174	Male	NA	NA	NA
242	08C73976||10_127677225_C_T	exome	NDD	autism	10_127677225_C_T	10	127677225	C	T	92565	FANK1	+	CDS			exonic	FANK1	.	synonymous SNV	FANK1:NM_001350939:exon3:c.C297T:p.L99L,FANK1:NM_145235:exon3:c.C297T:p.L99L	.	.	.	.	.	.	.	.	.	.	.	.	.	.	.	Satterstrom2020	08C73976	08C73976		08C74136	08C74135	Male	NA	NA	NA
243	10C107588||10_128118361_A_G	exome	NDD	autism	10_128118361_A_G	10	128118361	A	G	118611	C10orf90	-	CDS			exonic	C10orf90	.	synonymous SNV	C10orf90:NM_001004298:exon7:c.T1956C:p.S652S,C10orf90:NM_001350922:exon7:c.T1956C:p.S652S,C10orf90:NM_001350921:exon8:c.T2247C:p.S749S	.	.	.	.	.	.	.	.	.	.	.	.	.	.	.	DeRubeis2014;Satterstrom2020	10C107588	;10C107588		;10C107584	;10C107583	;Male	NA	NA	NA
244	DDDP100650||10_128153274_A_G	exome	NDD	DD	10_128153274_A_G	10	128153274	A	G	118611	C10orf90	-	CDS||3'UTR			exonic	C10orf90	.	nonsynonymous SNV	C10orf90:NM_001004298:exon4:c.T1525C:p.F509L,C10orf90:NM_001350921:exon5:c.T1816C:p.F606L	T	B	B	N	N	N	T	N	T	T	T	N	0.009	0.131	0.353	Heyne_2018	DDDP100650		simplex			female	NA	NA	NA
245	DDDP120217||10_1284215_G_A	exome	NDD	DD	10_1284215_G_A	10	1284215	G	A	105	ADARB2	-	CDS			exonic	ADARB2	.	nonsynonymous SNV	ADARB2:NM_018702:exon5:c.C1340T:p.T447M	D	B	B	N	D	L	D	N	D	D	D	D	24.6	1.029	0.343	Heyne_2018	DDDP120217		simplex			male	NA	NA	NA
246	13739.p1||10_128776178_T_G	exome	NDD	autism	10_128776178_T_G	10	128776178	T	G	1793	DOCK1	+	intron			intronic	DOCK1	.	.	.	.	.	.	.	.	.	.	.	.	.	.	.	.	.	.	Iossifov;Satterstrom2020	13739.p1	;13739		;SSC08672	;SSC08668	;Female	NA	NA	NA
247	Fam_151879||10_128795122_T_A	exome	NDD	E_NDD	10_128795122_T_A	10	128795122	T	A	1793	DOCK1	+	CDS			exonic	DOCK1	.	nonsynonymous SNV	DOCK1:NM_001290223:exon7:c.T584A:p.V195E,DOCK1:NM_001380:exon7:c.T584A:p.V195E	D	P	P	D	D	L	T	D	T	T	D	D	25.8	0.964	1	Heyne_2018	Fam_151879		simplex			male	NA	NA	NA
248	13039.s1||10_129183053_G_C	exome	control	control	10_129183053_G_C	10	129183053	G	C	1793	DOCK1	+	intron			splicing	DOCK1	NM_001290223:exon38:c.3808-1G>C;NM_001380:exon38:c.3745-1G>C	.	.	.	.	.	.	D	.	.	.	.	.	.	D	23.8	1.048	0.934	Iossifov;Satterstrom2020	13039.s1	;13039		;SSC06490	;SSC06480	;Male	NA	NA	NA
249	DDDP108313||10_129207337_C_T	exome	NDD	DD	10_129207337_C_T	10	129207337	C	T	1793	DOCK1	+	CDS			exonic	DOCK1	.	nonsynonymous SNV	DOCK1:NM_001290223:exon41:c.C4159T:p.R1387C,DOCK1:NM_001380:exon41:c.C4096T:p.R1366C	D	D	D	D	D	M	T	D	T	T	D	D	35	0.935	0.995	Heyne_2018	DDDP108313		simplex			female	NA	NA	NA
250	DDDP114641||10_129207427_A_T	exome	NDD	DD	10_129207427_A_T	10	129207427	A	T	1793	DOCK1	+	CDS			exonic	DOCK1	.	nonsynonymous SNV	DOCK1:NM_001290223:exon41:c.A4249T:p.N1417Y,DOCK1:NM_001380:exon41:c.A4186T:p.N1396Y	D	B	B	N	N	M	T	D	T	T	T	N	21.9	1.199	0.989	Heyne_2018	DDDP114641		simplex			female	NA	NA	NA
251	14565.p1||10_129242541_C_T	exome	NDD	autism	10_129242541_C_T	10	129242541	C	T	1793	DOCK1	+	CDS			exonic	DOCK1	.	nonsynonymous SNV	DOCK1:NM_001290223:exon50:c.C5411T:p.S1804L,DOCK1:NM_001380:exon50:c.C5348T:p.S1783L	D	B	B	N	D	M	T	N	T	T	T	D	23.5	0.932	0.12	Iossifov;Satterstrom2020	14565.p1	;14565		;36888	;36890	;Male	NA	NA	NA
252	04C35939||10_129350898_T_A	exome	NDD	autism	10_129350898_T_A	10	129350898	T	A	594857	NPS	+	CDS			exonic	NPS	.	nonsynonymous SNV	NPS:NM_001030013:exon3:c.T265A:p.S89T	D	B	B	U	N	.	T	N	T	T	T	N	22.8	0.11	0.989	Satterstrom2020	04C35939	04C35939		04C35937	04C35936	Female	NA	NA	NA
253	13698.p1||10_12940460_T_C	exome	NDD	autism	10_12940460_T_C	10	12940460	T	C	83643	CCDC3	-	CDS			exonic	CCDC3	.	nonsynonymous SNV	CCDC3:NM_031455:exon3:c.A769G:p.I257V,CCDC3:NM_001282658:exon7:c.A394G:p.I132V	T	B	B	N	N	L	.	N	T	T	T	D	0.008	-0.013	0.093	Satterstrom2020	13698.p1	13698		SSC08420	SSC08412	Male	NA	NA	NA
254	18_de_Ligt||10_129690984_A_T	exome	NDD	ID	10_129690984_A_T	10	129690984	A	T	119467	CLRN3	-	CDS			exonic	CLRN3	.	nonsynonymous SNV	CLRN3:NM_152311:exon1:c.T65A:p.I22N	D	P	P	N	N	M	T	D	T	T	D	N	23.6	1.199	0.004	Heyne_2018	18_de_Ligt		simplex			male	NA	NA	NA
255	deLigt18||10_129690984_A_T	exome	NDD	ID	10_129690984_A_T	10	129690984	A	T	119467	CLRN3	-	CDS			exonic	CLRN3	.	nonsynonymous SNV	CLRN3:NM_152311:exon1:c.T65A:p.I22N	D	P	P	N	N	M	T	D	T	T	D	N	23.6	1.199	0.004	deLigt2012	deLigt18						NA	NA	NA
256	03HI2709A||10_129845661_G_A	exome	NDD	autism	10_129845661_G_A	10	129845661	G	A	5791	PTPRE	+	CDS			exonic	PTPRE	.	synonymous SNV	PTPRE:NM_001316677:exon3:c.G117A:p.P39P,PTPRE:NM_001323354:exon3:c.G117A:p.P39P,PTPRE:NM_001323355:exon3:c.G177A:p.P59P,PTPRE:NM_001323356:exon3:c.G177A:p.P59P,PTPRE:NM_006504:exon4:c.G117A:p.P39P,PTPRE:NM_001316676:exon5:c.G150A:p.P50P	.	.	.	.	.	.	.	.	.	.	.	.	.	.	.	Satterstrom2020	03HI2709A	03HI2709A		03HI2707A	03HI2708A	Female	NA	NA	NA
257	08C76399||10_129861483_C_T	exome	NDD	autism	10_129861483_C_T	10	129861483	C	T	5791	PTPRE	+	intron			intronic	PTPRE	.	.	.	.	.	.	.	.	.	.	.	.	.	.	.	.	.	.	Satterstrom2020	08C76399	08C76399		08C76400	08C76398	Male	NA	NA	NA
258	12795.p1||10_129900855_G_A	exome	NDD	autism	10_129900855_G_A	10	129900855	G	A	4288	MKI67	-	CDS			exonic	MKI67	.	synonymous SNV	MKI67:NM_001145966:exon12:c.C8169T:p.V2723V,MKI67:NM_002417:exon13:c.C9249T:p.V3083V	.	.	.	.	.	.	.	.	.	.	.	.	.	.	.	Satterstrom2020	12795.p1	12795		SSC05725	SSC05724	Male	NA	NA	NA
259	13530.p1||10_129903200_A_G	exome	NDD	autism;ASD	10_129903200_A_G	10	129903200	A	G	4288	MKI67	-	CDS			exonic	MKI67	.	nonsynonymous SNV	MKI67:NM_001145966:exon12:c.T5824C:p.W1942R,MKI67:NM_002417:exon13:c.T6904C:p.W2302R	T	B	B	N	N	N	T	N	T	T	T	N	0.001	-2.669	0	Iossifov;Heyne_2018;Satterstrom2020	13530.p1	;13530	;simplex	;4965	;4997	;female;Female	NA	NA	NA
260	DEASD_0066_001||10_129906031_T_A	exome	NDD	autism	10_129906031_T_A	10	129906031	T	A	4288	MKI67	-	CDS			exonic	MKI67	.	nonsynonymous SNV	MKI67:NM_001145966:exon12:c.A2993T:p.H998L,MKI67:NM_002417:exon13:c.A4073T:p.H1358L	T	P	B	N	N	M	T	D	T	T	T	N	15.43	0.098	0	DeRubeis2014;Satterstrom2020	DEASD_0066_001	;DEASD_0066_001		;DEASD_0066_500	;DEASD_0066_600	;Male	NA	NA	NA
261	1603-1||10_129909975_G_A	exome	NDD	schizophrenia	10_129909975_G_A	10	129909975	G	A	4288	MKI67	-	CDS			exonic	MKI67	.	stopgain	MKI67:NM_001145966:exon10:c.C1114T:p.R372X,MKI67:NM_002417:exon11:c.C2194T:p.R732X	.	.	.	N	A	.	.	.	.	.	.	N	35	1.048	0.281	Fromer2014	1603-1						NA	NA	NA
262	14228.p1||10_131639146_C_G	exome	NDD	autism	10_131639146_C_G	10	131639146	C	G	253738	EBF3	-	CDS			exonic	EBF3	.	nonsynonymous SNV	EBF3:NM_001005463:exon14:c.G1496C:p.G499A	D	B	B	D	D	L	T	N	T	T	T	D	23.4	0.935	1	SSC_Iossifov_2014	14228.p1	14228		14228.fa	14228.mo	Male	NA	NA	NA
263	DDDP110983||10_131646680_C_T	exome	NDD	DD	10_131646680_C_T	10	131646680	C	T	253738	EBF3	-	CDS			exonic	EBF3	.	synonymous SNV	EBF3:NM_001005463:exon11:c.G1077A:p.P359P	.	.	.	.	.	.	.	.	.	.	.	.	.	.	.	Heyne_2018	DDDP110983		simplex			male	NA	NA	NA
264	DDDP109017||10_131676089_C_A	exome	NDD	DD	10_131676089_C_A	10	131676089	C	A	253738	EBF3	-	CDS			exonic	EBF3	.	nonsynonymous SNV	EBF3:NM_001005463:exon7:c.G579T:p.K193N	D	D	D	D	D	M	T	D	T	T	D	D	33	0.931	1	Heyne_2018	DDDP109017		simplex			female	NA	NA	NA
265	DEASD_1019_001||10_13169821_A_G	exome	NDD	autism	10_13169821_A_G	10	13169821	A	G	10133	OPTN	+	CDS			exonic	OPTN	.	nonsynonymous SNV	OPTN:NM_021980:exon11:c.A1319G:p.K440R,OPTN:NM_001008212:exon12:c.A1319G:p.K440R,OPTN:NM_001008211:exon13:c.A1319G:p.K440R,OPTN:NM_001008213:exon13:c.A1319G:p.K440R	T	D	D	D	D	M	D	N	D	D	D	D	27.1	1.199	0.991	Satterstrom2020	DEASD_1019_001	DEASD_1019_001		DEASD_1019_500	DEASD_1019_600	Male	NA	NA	NA
266	DDDP119024||10_131755521_C_T	exome	NDD	DD	10_131755521_C_T	10	131755521	C	T	253738	EBF3	-	intron			splicing	EBF3	NM_001005463:exon6:c.554+1G>A	.	.	.	.	.	.	D	.	.	.	.	.	.	D	25.5	0.935	1	Heyne_2018	DDDP119024		simplex			female	NA	NA	NA
267	DDDP119201||10_131755546_G_A	exome	NDD	DD	10_131755546_G_A	10	131755546	G	A	253738	EBF3	-	CDS			exonic	EBF3	.	nonsynonymous SNV	EBF3:NM_001005463:exon6:c.C530T:p.P177L	D	D	D	D	D	M	T	D	D	D	D	D	27	1.048	0.991	Heyne_2018	DDDP119201		simplex			male	NA	NA	NA
268	11406.s1||10_131757278_G_A	exome	control	control	10_131757278_G_A	10	131757278	G	A	253738	EBF3	-	intron			intronic	EBF3	.	.	.	.	.	.	.	.	.	.	.	.	.	.	.	.	.	.	Krumm	11406.s1						NA	NA	NA
269	DDDP107733||10_131761205_C_G	exome	NDD	DD	10_131761205_C_G	10	131761205	C	G	253738	EBF3	-	3'UTR			splicing	EBF3	NM_001005463:exon3:c.355+1G>C	.	.	.	.	.	.	D	.	.	.	.	.	.	D	22.9	0.87	0.986	Heyne_2018	DDDP107733		simplex			male	NA	NA	NA
270	13271.s1||10_131959216_C_G	exome	control	control	10_131959216_C_G	10	131959216	C	G	10539	GLRX3	+	CDS||5'UTR			exonic	GLRX3	.	nonsynonymous SNV	GLRX3:NM_001199868:exon4:c.C433G:p.P145A,GLRX3:NM_006541:exon4:c.C433G:p.P145A	D	B	B	D	D	M	T	D	T	T	T	D	23.9	0.852	0.975	Iossifov;Satterstrom2020	13271.s1	;13271		;SSC07118	;SSC07107	;Female	NA	NA	NA
271	DDDP114121||10_13213229_C_T	exome	NDD	DD	10_13213229_C_T	10	13213229	C	T	55388	MCM10	+	CDS			exonic	MCM10	.	synonymous SNV	MCM10:NM_018518:exon3:c.C315T:p.A105A,MCM10:NM_182751:exon3:c.C315T:p.A105A	.	.	.	.	.	.	.	.	.	.	.	.	.	.	.	Heyne_2018	DDDP114121		simplex			male	NA	NA	NA
272	DDDP118478||10_13213247_G_A	exome	NDD	DD	10_13213247_G_A	10	13213247	G	A	55388	MCM10	+	CDS			exonic	MCM10	.	synonymous SNV	MCM10:NM_018518:exon3:c.G333A:p.T111T,MCM10:NM_182751:exon3:c.G333A:p.T111T	.	.	.	.	.	.	.	.	.	.	.	.	.	.	.	Heyne_2018	DDDP118478		simplex			female	NA	NA	NA
273	10C104175||10_13246401_G_T	exome	NDD	autism	10_13246401_G_T	10	13246401	G	T	55388	MCM10	+	intron			intronic	MCM10	.	.	.	.	.	.	.	.	.	.	.	.	.	.	.	.	.	.	Satterstrom2020	10C104175	10C104175		10C104176	10C104177	Male	NA	NA	NA
274	11367.p1||10_13275601_C_T	exome	NDD	autism	10_13275601_C_T	10	13275601	C	T	221044	UCMA	-	CDS			exonic	UCMA	.	nonsynonymous SNV	UCMA:NM_145314:exon3:c.G157A:p.D53N	D	D	D	D	D	M	.	D	T	T	T	D	33	0.935	0.989	Iossifov;Satterstrom2020	11367.p1	;11367		;SSC00990	;SSC11562	;Male	NA	NA	NA
275	13730.p1||10_132915185_G_A	exome	NDD	autism	10_132915185_G_A	10	132915185	G	A	256536	TCERG1L	-	CDS			exonic	TCERG1L	.	synonymous SNV	TCERG1L:NM_174937:exon9:c.C1272T:p.C424C	.	.	.	.	.	.	.	.	.	.	.	.	.	.	.	Iossifov;Satterstrom2020	13730.p1	;13730		;SSC09250	;SSC08366	;Female	NA	NA	NA
276	13851.s1||10_132944875_C_G	exome	control	control	10_132944875_C_G	10	132944875	C	G	256536	TCERG1L	-	CDS			exonic	TCERG1L	.	synonymous SNV	TCERG1L:NM_174937:exon7:c.G1083C:p.T361T	.	.	.	.	.	.	.	.	.	.	.	.	.	.	.	Krumm	13851.s1						NA	NA	NA
277	13570.p1||10_132965064_T_C	exome	NDD	autism	10_132965064_T_C	10	132965064	T	C	256536	TCERG1L	-	CDS			exonic	TCERG1L	.	nonsynonymous SNV	TCERG1L:NM_174937:exon5:c.A941G:p.D314G	T	B	B	N	N	L	T	N	T	T	T	N	13.1	1.061	0.004	Iossifov;Satterstrom2020	13570.p1	;13570		;SSC08115	;SSC08108	;Male	NA	NA	NA
278	13290.p1||10_133950737_C_T	exome	NDD	autism	10_133950737_C_T	10	133950737	C	T	282973	JAKMIP3	+	intron			intronic	JAKMIP3	.	.	.	.	.	.	.	.	.	.	.	.	.	.	.	.	.	.	Satterstrom2020	13290.p1	13290		13290.fa	13290.mo	Male	NA	NA	NA
279	04C29183||10_134006211_G_A	exome	NDD	autism	10_134006211_G_A	10	134006211	G	A	10570	DPYSL4	+	CDS			exonic	DPYSL4	.	nonsynonymous SNV	DPYSL4:NM_006426:exon3:c.G178A:p.A60T	D	D	D	D	D	M	D	D	D	D	D	D	33	1.048	0.651	Satterstrom2020	04C29183	04C29183		04C29125	04C29162	Female	NA	NA	NA
280	DEASD_1090_001||10_134062552_G_C	exome	NDD	autism	10_134062552_G_C	10	134062552	G	C	282974	STK32C	-	exon_unclassified			intronic	STK32C	.	.	.	.	.	.	.	.	.	.	.	.	.	.	.	.	.	.	Satterstrom2020	DEASD_1090_001	DEASD_1090_001		DEASD_1090_500	DEASD_1090_600	Male	NA	NA	NA
281	11291.s1||10_134147088_T_G	exome	control	control	10_134147088_T_G	10	134147088	T	G	80313	LRRC27	+	CDS			exonic	LRRC27	.	synonymous SNV	LRRC27:NM_001143757:exon2:c.T60G:p.G20G,LRRC27:NM_001143758:exon2:c.T60G:p.G20G,LRRC27:NM_001143759:exon2:c.T60G:p.G20G,LRRC27:NM_030626:exon2:c.T60G:p.G20G	.	.	.	.	.	.	.	.	.	.	.	.	.	.	.	Krumm	11291.s1						NA	NA	NA
282	200675411@1082034626||10_134158126_C_T	exome	NDD	autism	10_134158126_C_T	10	134158126	C	T	80313	LRRC27	+	CDS			exonic	LRRC27	.	synonymous SNV	LRRC27:NM_001309474:exon4:c.C144T:p.H48H,LRRC27:NM_001143757:exon5:c.C525T:p.H175H,LRRC27:NM_001143758:exon5:c.C525T:p.H175H,LRRC27:NM_001143759:exon5:c.C525T:p.H175H,LRRC27:NM_030626:exon5:c.C525T:p.H175H	.	.	.	.	.	.	.	.	.	.	.	.	.	.	.	Satterstrom2020	200675411@1082034626	200675411@1082034626		200675409@1082034421	200675410@1082034601	Male	NA	NA	NA
283	348-07-108691||10_134218324_C_T	exome	NDD	autism	10_134218324_C_T	10	134218324	C	T	170394	PWWP2B	+	CDS			exonic	PWWP2B	.	nonsynonymous SNV	PWWP2B:NM_001098637:exon2:c.C320T:p.P107L,PWWP2B:NM_138499:exon2:c.C320T:p.P107L	T	P	B	U	D	M	T	D	T	T	T	D	23.3	0.843	0.008	Satterstrom2020	348-07-108691	348-07-108691		350-07-108693	349-07-108692	Male	NA	NA	NA
284	7902-01-001||10_134511300_G_A	exome	NDD	autism	10_134511300_G_A	10	134511300	G	A	3632	INPP5A	+	intron			intronic	INPP5A	.	.	.	.	.	.	.	.	.	.	.	.	.	.	.	.	.	.	Satterstrom2020	7902-01-001	7902-01-001		7902-01-001-02	7902-01-001-01	Female	NA	NA	NA
285	DDDP112843||10_134511420_C_A	exome	NDD	DD	10_134511420_C_A	10	134511420	C	A	3632	INPP5A	+	CDS			exonic	INPP5A	.	synonymous SNV	INPP5A:NM_001321042:exon3:c.C279A:p.P93P,INPP5A:NM_005539:exon6:c.C471A:p.P157P	.	.	.	.	.	.	.	.	.	.	.	.	.	.	.	Heyne_2018	DDDP112843		simplex			female	NA	NA	NA
286	13947.s1||10_134521934_C_T	exome	control	control	10_134521934_C_T	10	134521934	C	T	3632	INPP5A	+	intron			intronic	INPP5A	.	.	.	.	.	.	.	.	.	.	.	.	.	.	.	.	.	.	Satterstrom2020	13947.s1	13947		13947.fa	13947.mo	Female	NA	NA	NA
287	14228.s1||10_134627777_G_T	exome	control	control	10_134627777_G_T	10	134627777	G	T	54777	TTC40	-	intron			intronic	CFAP46	.	.	.	.	.	.	.	.	.	.	.	.	.	.	.	.	.	.	SSC_Iossifov_2014	14228.s1	14228		14228.fa	14228.mo	Male	NA	NA	NA
288	12579.p1||10_134743800_A_G	exome	NDD	autism	10_134743800_A_G	10	134743800	A	G	54777	TTC40	-	intron			intronic	CFAP46	.	.	.	.	.	.	.	.	.	.	.	.	.	.	.	.	.	.	Iossifov	12579.p1						NA	NA	NA
289	11482.p1||10_134752145_C_T	exome	NDD	autism	10_134752145_C_T	10	134752145	C	T	255352		-	CDS			exonic	CFAP46	.	nonsynonymous SNV	CFAP46:NM_001200049:exon5:c.G484A:p.V162M	D	D	D	U	N	M	D	N	T	D	D	N	24.5	0.931	0.005	Krumm	11482.p1						NA	NA	NA
290	aiq||10_134981792_C_T	exome	NDD	EE	10_134981792_C_T	10	134981792	C	T	85442	KNDC1	+	CDS			exonic	KNDC1	.	synonymous SNV	KNDC1:NM_001347864:exon3:c.C336T:p.F112F,KNDC1:NM_001347865:exon3:c.C336T:p.F112F,KNDC1:NM_001347866:exon3:c.C336T:p.F112F,KNDC1:NM_152643:exon3:c.C336T:p.F112F	.	.	.	.	.	.	.	.	.	.	.	.	.	.	.	Heyne_2018	aiq		simplex			female	NA	NA	NA
291	DDDP115155||10_134999792_G_C	exome	NDD	DD	10_134999792_G_C	10	134999792	G	C	85442	KNDC1	+	CDS			exonic	KNDC1	.	nonsynonymous SNV	KNDC1:NM_152643:exon6:c.G940C:p.D314H	D	D	P	N	N	L	T	N	T	T	T	N	17.41	1.003	0.003	Heyne_2018	DDDP115155		simplex			female	NA	NA	NA
292	13524.s1||10_135011153_G_A	exome	control	control	10_135011153_G_A	10	135011153	G	A	85442	KNDC1	+	intron			intronic	KNDC1	.	.	.	.	.	.	.	.	.	.	.	.	.	.	.	.	.	.	Satterstrom2020	13524.s1	13524		13524.fa	13524.mo	Female	NA	NA	NA
293	G01-GEA-31-HI||10_135012705_G_A	exome	NDD	autism	10_135012705_G_A	10	135012705	G	A	85442	KNDC1	+	CDS			exonic	KNDC1	.	nonsynonymous SNV	KNDC1:NM_152643:exon14:c.G2693A:p.R898H	T	B	B	N	N	L	T	N	T	T	T	N	21.9	0.9	0.419	Satterstrom2020	G01-GEA-31-HI	G01-GEA-31-HI		G01-GEA-31-PA	G01-GEA-31-MA	Male	NA	NA	NA
294	25221.p1||10_135024213_A_G	exome	NDD	tourette_syndrome	10_135024213_A_G	10	135024213	A	G	85442	KNDC1	+	CDS			exonic	KNDC1	.	nonsynonymous SNV	KNDC1:NM_152643:exon21:c.A3893G:p.N1298S	T	B	B	N	N	N	T	N	T	T	T	N	0.03	-0.283	0.963	Willsey2017	25221.p1						NA	NA	NA
295	58289068||10_135025023_C_T	exome	NDD	tourette_syndrome	10_135025023_C_T	10	135025023	C	T	85442	KNDC1	+	CDS			exonic	KNDC1	.	nonsynonymous SNV	KNDC1:NM_152643:exon22:c.C4006T:p.P1336S	T	B	B	N	N	N	T	N	T	T	T	N	0.012	-1.115	0.053	Willsey2017	58289068						NA	NA	NA
296	12761.p1||10_135027123_A_G	exome	NDD	autism	10_135027123_A_G	10	135027123	A	G	85442	KNDC1	+	intron			intronic	KNDC1	.	.	.	.	.	.	.	.	.	.	.	.	.	.	.	.	.	.	Iossifov;Satterstrom2020	12761.p1	;12761		;70296	;70312	;Male	NA	NA	NA
297	DDDP115724||10_135093278_C_T	exome	NDD	DD	10_135093278_C_T	10	135093278	C	T	10844	TUBGCP2	-	CDS			exonic	TUBGCP2	.	nonsynonymous SNV	TUBGCP2:NM_001256618:exon17:c.G2311A:p.A771T,TUBGCP2:NM_006659:exon18:c.G2701A:p.A901T,TUBGCP2:NM_001256617:exon19:c.G2785A:p.A929T	D	P	B	N	N	L	T	N	T	T	T	D	22.2	0.07	0.011	Heyne_2018	DDDP115724		simplex			female	NA	NA	NA
298	11917.s1||10_135094782_G_A	exome	control	control	10_135094782_G_A	10	135094782	G	A	10844	TUBGCP2	-	CDS			exonic	TUBGCP2	.	synonymous SNV	TUBGCP2:NM_001256618:exon16:c.C2178T:p.I726I,TUBGCP2:NM_006659:exon17:c.C2568T:p.I856I,TUBGCP2:NM_001256617:exon18:c.C2652T:p.I884I	.	.	.	.	.	.	.	.	.	.	.	.	.	.	.	Iossifov;Satterstrom2020	11917.s1	;11917		;SSC04920	;SSC04914	;Female	NA	NA	NA
299	DEASD_0383_001||10_135106567_T_C	exome	NDD	autism	10_135106567_T_C	10	135106567	T	C	10844	TUBGCP2	-	CDS			exonic	TUBGCP2	.	nonsynonymous SNV	TUBGCP2:NM_001256618:exon6:c.A610G:p.T204A,TUBGCP2:NM_006659:exon7:c.A1000G:p.T334A,TUBGCP2:NM_001256617:exon8:c.A1084G:p.T362A	T	B	B	D	D	L	T	N	T	T	T	D	23.3	0.964	0.988	DeRubeis2014;Satterstrom2020	DEASD_0383_001	;DEASD_0383_001		;DEASD_0383_500	;DEASD_0383_600	;Male	NA	NA	NA
300	F10340-1||10_135169301_C_T	exome	NDD	autism	10_135169301_C_T	10	135169301	C	T	282969	C10orf125	-	CDS			exonic	FUOM	.	synonymous SNV	FUOM:NM_001301827:exon4:c.G270A:p.K90K,FUOM:NM_001098483:exon5:c.G339A:p.K113K,FUOM:NM_001301828:exon5:c.G204A:p.K68K,FUOM:NM_198472:exon5:c.G339A:p.K113K	.	.	.	.	.	.	.	.	.	.	.	.	.	.	.	Satterstrom2020	F10340-1	F10340-1		F10340-3	F10340-2	Male	NA	NA	NA
301	11285.s1||10_135169346_A_C	exome	control	control	10_135169346_A_C	10	135169346	A	C	282969	C10orf125	-	intron			intronic	FUOM	.	.	.	.	.	.	.	.	.	.	.	.	.	.	.	.	.	.	Satterstrom2020	11285.s1	11285		SSC02297	SSC02294	Male	NA	NA	NA
302	DDDP113450||10_135183407_C_T	exome	NDD	DD	10_135183407_C_T	10	135183407	C	T	1892	ECHS1	-	intron			splicing	ECHS1	NM_004092:exon3:c.414+1G>A	.	.	.	.	.	.	D	.	.	.	.	.	.	D	24.6	0.934	0.071	Heyne_2018	DDDP113450		simplex			male	NA	NA	NA
303	13301.s1||10_135184278_A_G	exome	control	control	10_135184278_A_G	10	135184278	A	G	1892	ECHS1	-	intron			intronic	ECHS1	.	.	.	.	.	.	.	.	.	.	.	.	.	.	.	.	.	.	Iossifov;Satterstrom2020	13301.s1	;13301		;SSC07176	;SSC07173	;Male	NA	NA	NA
304	DDDP102250||10_135202549_C_G	exome	NDD	DD	10_135202549_C_G	10	135202549	C	G	196743	PAOX	+	CDS			exonic	PAOX	.	nonsynonymous SNV	PAOX:NM_207127:exon4:c.C958G:p.P320A,PAOX:NM_152911:exon5:c.C1211G:p.T404S,PAOX:NM_207128:exon5:c.C1211G:p.T404S	D	P	P	D	D	.	D	D	D	D	D	D	22.7	0.855	0.927	Heyne_2018	DDDP102250		simplex			male	NA	NA	NA
305	12645.p1||10_135203136_G_A	exome	NDD	autism	10_135203136_G_A	10	135203136	G	A	196743	PAOX	+	CDS			exonic	PAOX	.	nonsynonymous SNV	PAOX:NM_152911:exon6:c.G1277A:p.R426H	T	D	P	N	N	M	D	N	D	D	D	N	18.98	0.095	0.188	Iossifov;SSC_Iossifov_2014	12645.p1	;12645		;12645.fa	;12645.mo	;Male	NA	NA	NA
306	DDDP100060||10_135204891_T_G	exome	NDD	DD	10_135204891_T_G	10	135204891	T	G	196743	PAOX	+	CDS||3'UTR			exonic	PAOX	.	nonsynonymous SNV	PAOX:NM_207128:exon6:c.T1310G:p.M437R,PAOX:NM_152911:exon7:c.T1468G:p.W490G	T	D	P	D	N	.	D	D	D	D	D	D	24.3	0.968	0.995	Heyne_2018	DDDP100060		simplex			female	NA	NA	NA
307	3F899||10_135368609_C_A	exome	NDD	autism	10_135368609_C_A	10	135368609	C	A	93426	SYCE1	-	CDS			intronic	SYCE1	.	.	.	.	.	.	N	D	.	.	.	.	.	.	D	36	0.071	0.342	Satterstrom2020	3F899	3F899		4G110	4G109	Male	NA	NA	NA
308	14526.p1||10_13629108_A_G	exome	NDD	autism	10_13629108_A_G	10	13629108	A	G	8559	PRPF18	+	CDS			exonic	PRPF18	.	nonsynonymous SNV	PRPF18:NM_003675:exon1:c.A22G:p.I8V	T	B	B	D	D	M	.	N	T	T	T	N	17.34	1.136	0.975	Iossifov;Satterstrom2020	14526.p1	;14526		;36784	;36786	;Male	NA	NA	NA
309	DDDP104432||10_13658459_T_C	exome	NDD	DD	10_13658459_T_C	10	13658459	T	C	8559	PRPF18	+	CDS			exonic	PRPF18	.	nonsynonymous SNV	PRPF18:NM_003675:exon9:c.T854C:p.M285T	D	D	D	D	D	M	.	D	D	D	D	D	24.3	1.061	1	Heyne_2018	DDDP104432		simplex			male	NA	NA	NA
310	775||10_13658524_A_G	exome	NDD	ID	10_13658524_A_G	10	13658524	A	G	8559	PRPF18	+	CDS			exonic	PRPF18	.	nonsynonymous SNV	PRPF18:NM_003675:exon9:c.A919G:p.N307D	D	D	D	D	D	M	.	D	D	D	D	D	28.9	1.199	0.995	Heyne_2018	775		simplex			male	NA	NA	NA
311	Lelieveld_775||10_13658524_A_G	exome	NDD	ID	10_13658524_A_G	10	13658524	A	G	8559	PRPF18	+	CDS			exonic	PRPF18	.	nonsynonymous SNV	PRPF18:NM_003675:exon9:c.A919G:p.N307D	D	D	D	D	D	M	.	D	D	D	D	D	28.9	1.199	0.995	Lelieveld2016	Lelieveld_775						NA	NA	NA
312	14007.s1||10_13852928_G_A	exome	control	control	10_13852928_G_A	10	13852928	G	A	55691	FRMD4A	-	intron			intronic	FRMD4A	.	.	.	.	.	.	.	.	.	.	.	.	.	.	.	.	.	.	Iossifov;Satterstrom2020	14007.s1	;14007		;31776	;31778	;Male	NA	NA	NA
313	ajc||10_13900900_G_A	exome	NDD	EE	10_13900900_G_A	10	13900900	G	A	55691	FRMD4A	-	CDS			exonic	FRMD4A	.	nonsynonymous SNV	FRMD4A:NM_001318336:exon2:c.C106T:p.R36C,FRMD4A:NM_001318337:exon2:c.C157T:p.R53C,FRMD4A:NM_018027:exon3:c.C58T:p.R20C	D	D	D	D	D	M	T	D	D	D	D	D	35	0.998	1	Heyne_2018	ajc		simplex			male	NA	NA	NA
314	2H163||10_14885766_A_G	exome	NDD	autism	10_14885766_A_G	10	14885766	A	G	51182	HSPA14	+	CDS||3'UTR			UTR3	HSPA14	NM_001278205:c.*186A>G	.	.	.	.	.	.	.	.	.	.	.	.	.	.	.	.	.	Satterstrom2020	2H163	2H163		5D043	5D042	Male	NA	NA	NA
315	13088.p1||10_14894334_T_C	exome	NDD	autism	10_14894334_T_C	10	14894334	T	C	51182	HSPA14	+	intron	SINE	1	intronic	HSPA14	.	.	.	.	.	.	.	.	.	.	.	.	.	.	.	.	.	.	Satterstrom2020	13088.p1	13088		SSC06492	SSC06481	Male	NA	NA	NA
316	ASDFI_782||10_14943297_T_C	exome	NDD	autism	10_14943297_T_C	10	14943297	T	C	79723	SUV39H2	+	intron			intronic	DCLRE1C;SUV39H2	.	.	.	.	.	.	.	.	.	.	.	.	.	.	.	.	.	.	Satterstrom2020	ASDFI_782	ASDFI_782		ASDFI_780	ASDFI_781	Male	NA	NA	NA
317	11324.s1||10_14951129_C_T	exome	control	control	10_14951129_C_T	10	14951129	C	T	64421	DCLRE1C	-	CDS			exonic	DCLRE1C	.	nonsynonymous SNV	DCLRE1C:NM_001289076:exon12:c.G1012A:p.E338K,DCLRE1C:NM_001289078:exon12:c.G1012A:p.E338K,DCLRE1C:NM_001350966:exon12:c.G1012A:p.E338K,DCLRE1C:NM_022487:exon13:c.G1012A:p.E338K,DCLRE1C:NM_001033855:exon14:c.G1357A:p.E453K,DCLRE1C:NM_001350965:exon14:c.G1357A:p.E453K,DCLRE1C:NM_001033857:exon15:c.G997A:p.E333K,DCLRE1C:NM_001289077:exon15:c.G997A:p.E333K,DCLRE1C:NM_001350967:exon15:c.G997A:p.E333K,…	D	P	P	N	D	M	T	N	T	T	T	D	23.3	0.935	1	Iossifov;Satterstrom2020	11324.s1	;11324		;11324.fa	;11324.mo	;Male	NA	NA	NA
318	14557.p1||10_14977449_C_G	exome	NDD	autism	10_14977449_C_G	10	14977449	C	G	64421	DCLRE1C	-	intron			intronic	DCLRE1C	.	.	.	.	.	.	.	.	.	.	.	.	.	.	.	.	.	.	Satterstrom2020	14557.p1	14557		36864	36866	Male	NA	NA	NA
319	12575.s1||10_14995953_G_A	exome	control	control	10_14995953_G_A	10	14995953	G	A	64421	DCLRE1C	-	CDS||5'UTR			exonic	DCLRE1C	.	synonymous SNV	DCLRE1C:NM_001033855:exon1:c.C57T:p.F19F,DCLRE1C:NM_001350965:exon1:c.C57T:p.F19F	.	.	.	.	.	.	.	.	.	.	.	.	.	.	.	Iossifov;SSC_Iossifov_2014	12575.s1	;12575		;12575.fa	;12575.mo	;Male	NA	NA	NA
320	528-04-101924||10_15115173_T_C	exome	control	control	10_15115173_T_C	10	15115173	T	C	55301	OLAH	+	CDS			exonic	OLAH	.	nonsynonymous SNV	OLAH:NM_001039702:exon8:c.T743C:p.L248S,OLAH:NM_018324:exon9:c.T902C:p.L301S	D	B	B	N	N	N	.	N	T	T	T	D	22.5	1.029	0.227	Satterstrom2020	528-04-101924	528-04-101924		527-04-101922	526-04-101919	Male	NA	NA	NA
321	12539.p1||10_15183471_A_T	exome	NDD	autism	10_15183471_A_T	10	15183471	A	T	9397	NMT2	-	CDS||5'UTR			exonic	NMT2	.	nonsynonymous SNV	NMT2:NM_001308295:exon2:c.T114A:p.S38R,NMT2:NM_004808:exon2:c.T196A:p.S66T	T	B	B	N	D	L	T	N	T	T	T	D	12.52	1.199	0.98	Iossifov;Satterstrom2020	12539.p1	;12539		;SSC05194	;SSC05181	;Male	NA	NA	NA
322	512-04-101865||10_15600168_T_A	exome	NDD	autism	10_15600168_T_A	10	15600168	T	A	8516	ITGA8	-	CDS			exonic	ITGA8	.	nonsynonymous SNV	ITGA8:NM_001291494:exon25:c.A2626T:p.S876C,ITGA8:NM_003638:exon26:c.A2671T:p.S891C	D	D	P	N	N	M	T	N	T	T	T	D	23.8	1.051	0.499	Satterstrom2020	512-04-101865	512-04-101865		465-04-101693	464-04-101692	Male	NA	NA	NA
323	13306.p1||10_15634273_G_A	exome	NDD	autism	10_15634273_G_A	10	15634273	G	A	8516	ITGA8	-	CDS			exonic	ITGA8	.	nonsynonymous SNV	ITGA8:NM_001291494:exon21:c.C2197T:p.R733C,ITGA8:NM_003638:exon22:c.C2242T:p.R748C	D	D	D	D	D	M	T	D	T	T	D	D	35	1.048	0.998	Iossifov;Satterstrom2020	13306.p1	;13306		;68745	;68747	;Male	NA	NA	NA
324	DDDP106471||10_15686078_A_C	exome	NDD	DD	10_15686078_A_C	10	15686078	A	C	8516	ITGA8	-	CDS			exonic	ITGA8	.	nonsynonymous SNV	ITGA8:NM_001291494:exon12:c.T1305G:p.F435L,ITGA8:NM_003638:exon13:c.T1350G:p.F450L	D	D	P	D	D	M	T	D	T	T	D	D	25.1	0.23	0.198	Heyne_2018	DDDP106471		simplex			female	NA	NA	NA
325	213||10_15689035_C_T	exome	NDD	ID	10_15689035_C_T	10	15689035	C	T	8516	ITGA8	-	CDS			exonic	ITGA8	.	synonymous SNV	ITGA8:NM_001291494:exon11:c.G972A:p.L324L,ITGA8:NM_003638:exon12:c.G1017A:p.L339L	.	.	.	.	.	.	.	.	.	.	.	.	.	.	.	Heyne_2018	213		simplex			male	NA	NA	NA
326	14586.s1||10_16806500_G_A	exome	control	control	10_16806500_G_A	10	16806500	G	A	6251	RSU1	-	CDS			exonic	RSU1	.	nonsynonymous SNV	RSU1:NM_152724:exon3:c.C11T:p.P4L,RSU1:NM_012425:exon4:c.C170T:p.P57L	D	P	B	D	D	L	T	D	T	T	D	D	24	1.03	0.929	Satterstrom2020	14586.s1	14586		36929	36931	Male	NA	NA	NA
327	80001103032||10_16873414_C_T	exome	NDD	autism	10_16873414_C_T	10	16873414	C	T	8029	CUBN	-	CDS			exonic	CUBN	.	synonymous SNV	CUBN:NM_001081:exon65:c.G10365A:p.V3455V	.	.	.	.	.	.	.	.	.	.	.	.	.	.	.	Satterstrom2020	80001103032	80001103032		80001103032-2	80001103032-1	Male	NA	NA	NA
328	dc||10_16893321_A_G	exome	NDD	EE	10_16893321_A_G	10	16893321	A	G	8029	CUBN	-	CDS			exonic	CUBN	.	synonymous SNV	CUBN:NM_001081:exon60:c.T9576C:p.P3192P	.	.	.	.	.	.	.	.	.	.	.	.	.	.	.	Heyne_2018	dc		simplex			male	NA	NA	NA
329	DDDP116087||10_16918904_C_A	exome	NDD	DD	10_16918904_C_A	10	16918904	C	A	8029	CUBN	-	CDS			exonic	CUBN	.	nonsynonymous SNV	CUBN:NM_001081:exon57:c.G9098T:p.R3033M	T	P	B	N	N	M	T	N	T	T	D	N	23.5	-0.371	0.003	Heyne_2018	DDDP116087		simplex			male	NA	NA	NA
330	11316.p1||10_16930412_T_A	exome	NDD	autism	10_16930412_T_A	10	16930412	T	A	8029	CUBN	-	intron			intronic	CUBN	.	.	.	.	.	.	.	.	.	.	.	.	.	.	.	.	.	.	Satterstrom2020	11316.p1	11316		SSC00535	SSC00536	Female	NA	NA	NA
331	DDDP112717||10_16930530_T_C	exome	NDD	DD	10_16930530_T_C	10	16930530	T	C	8029	CUBN	-	CDS			exonic	CUBN	.	nonsynonymous SNV	CUBN:NM_001081:exon56:c.A8791G:p.I2931V	T	P	P	N	D	L	T	N	T	T	T	D	10.59	1.061	0.789	Heyne_2018	DDDP112717		simplex			female	NA	NA	NA
332	13943.s1||10_16942870_T_C	exome	control	control	10_16942870_T_C	10	16942870	T	C	8029	CUBN	-	intron			intronic	CUBN	.	.	.	.	.	.	.	.	.	.	.	.	.	.	.	.	.	.	Krumm;Satterstrom2020	13943.s1	;13943		;78716	;78718	;Male	NA	NA	NA
333	10C113318||10_16962087_C_T	exome	NDD	autism	10_16962087_C_T	10	16962087	C	T	8029	CUBN	-	CDS			exonic	CUBN	.	synonymous SNV	CUBN:NM_001081:exon44:c.G6696A:p.V2232V	.	.	.	.	.	.	.	.	.	.	.	.	.	.	.	DeRubeis2014	10C113318						NA	NA	NA
334	G01-GEA-110-HI||10_17065605_T_A	exome	NDD	autism	10_17065605_T_A	10	17065605	T	A	8029	CUBN	-	intron			intronic	CUBN	.	.	.	.	.	.	.	.	.	.	.	.	.	.	.	.	.	.	Satterstrom2020	G01-GEA-110-HI	G01-GEA-110-HI		G01-GEA-110-PA	G01-GEA-110-MA	Female	NA	NA	NA
335	12772.s1||10_17089529_G_T	exome	control	control	10_17089529_G_T	10	17089529	G	T	8029	CUBN	-	CDS			exonic	CUBN	.	nonsynonymous SNV	CUBN:NM_001081:exon23:c.C3213A:p.N1071K	T	P	B	D	N	M	T	D	T	T	T	N	17.73	0.067	0.998	Iossifov;Satterstrom2020	12772.s1	;12772		;SSC05700	;SSC05677	;Male	NA	NA	NA
336	DDDP100130||10_17113476_G_C	exome	NDD	DD	10_17113476_G_C	10	17113476	G	C	8029	CUBN	-	CDS			exonic	CUBN	.	nonsynonymous SNV	CUBN:NM_001081:exon19:c.C2574G:p.F858L	D	D	D	D	D	H	T	D	T	T	D	D	25.8	1.048	0.989	Heyne_2018	DDDP100130		simplex			male	NA	NA	NA
337	13844.p1||10_17127755_G_A	exome	NDD	autism;ASD	10_17127755_G_A	10	17127755	G	A	8029	CUBN	-	CDS			exonic	CUBN	.	stopgain	CUBN:NM_001081:exon16:c.C1951T:p.R651X	.	.	.	N	A	.	.	.	.	.	.	D	44	1.048	1	Iossifov;Heyne_2018;Satterstrom2020	13844.p1	;13844	;simplex	;4830	;4862	;male;Male	NA	NA	NA
338	Fam_161147||10_17142199_T_C	exome	NDD	E_NDD	10_17142199_T_C	10	17142199	T	C	8029	CUBN	-	CDS			exonic	CUBN	.	nonsynonymous SNV	CUBN:NM_001081:exon14:c.A1570G:p.M524V	T	B	B	N	N	N	T	N	T	T	T	N	0.001	-0.421	0.005	Heyne_2018	Fam_161147		simplex			male	NA	NA	NA
339	12916.p1||10_17199484_G_T	exome	NDD	autism	10_17199484_G_T	10	17199484	G	T	1787	TRDMT1	-	CDS			exonic	TRDMT1	.	nonsynonymous SNV	TRDMT1:NM_001321006:exon6:c.C600A:p.D200E,TRDMT1:NM_001351221:exon6:c.C705A:p.D235E,TRDMT1:NM_001351219:exon8:c.C843A:p.D281E,TRDMT1:NM_001351220:exon8:c.C843A:p.D281E,TRDMT1:NM_004412:exon8:c.C843A:p.D281E,TRDMT1:NM_001321007:exon9:c.C630A:p.D210E,TRDMT1:NM_001351222:exon9:c.C630A:p.D210E,TRDMT1:NM_001351223:exon9:c.C630A:p.D210E	D	D	D	D	D	H	T	D	T	T	D	D	23.6	-0.285	0.506	Iossifov;Satterstrom2020	12916.p1	;12916		;SSC06451	;SSC06441	;Male	NA	NA	NA
340	11333.p1||10_17401562_T_C	exome	NDD	autism	10_17401562_T_C	10	17401562	T	C	338596	ST8SIA6	-	CDS			exonic	ST8SIA6	.	nonsynonymous SNV	ST8SIA6:NM_001004470:exon4:c.A328G:p.I110V	T	B	B	N	N	L	T	N	T	T	T	D	14.14	1.061	0.998	Satterstrom2020	11333.p1	11333		SSC00319	SSC00318	Male	NA	NA	NA
341	11333.s1||10_17401562_T_C	exome	control	control	10_17401562_T_C	10	17401562	T	C	338596	ST8SIA6	-	CDS			exonic	ST8SIA6	.	nonsynonymous SNV	ST8SIA6:NM_001004470:exon4:c.A328G:p.I110V	T	B	B	N	N	L	T	N	T	T	T	D	14.14	1.061	0.998	Satterstrom2020	11333.s1	11333		SSC00319	SSC00318	Male	NA	NA	NA
342	ASDFI_1007||10_17645573_G_C	exome	NDD	autism	10_17645573_G_C	10	17645573	G	C	9200	PTPLA	-	CDS||3'UTR			exonic	HACD1	.	nonsynonymous SNV	HACD1:NM_014241:exon4:c.C469G:p.H157D	D	B	B	N	D	L	T	D	T	T	T	D	21.6	0.993	1	DeRubeis2014;Satterstrom2020	ASDFI_1007	;ASDFI_1007		;ASDFI_1009	;ASDFI_1008	;Male	NA	NA	NA
343	150999||10_17735316_G_A	exome	NDD	autism	10_17735316_G_A	10	17735316	G	A	8027	STAM	+	intron			intronic	STAM	.	.	.	.	.	.	.	.	.	.	.	.	.	.	.	.	.	.	Satterstrom2020	150999	150999		151001	151000	Male	NA	NA	NA
344	13576.s1||10_17746509_A_T	exome	control	control	10_17746509_A_T	10	17746509	A	T	8027	STAM	+	CDS			exonic	STAM	.	nonsynonymous SNV	STAM:NM_001324286:exon7:c.A701T:p.H234L,STAM:NM_001324287:exon8:c.A659T:p.H220L,STAM:NM_001324282:exon9:c.A896T:p.H299L,STAM:NM_001324283:exon9:c.A842T:p.H281L,STAM:NM_001324289:exon10:c.A608T:p.H203L,STAM:NM_003473:exon10:c.A992T:p.H331L,STAM:NM_001324284:exon11:c.A842T:p.H281L,STAM:NM_001324285:exon11:c.A842T:p.H281L,STAM:NM_001324288:exon11:c.A608T:p.H203L	T	P	B	D	D	L	T	D	T	T	T	D	22.8	1.14	1	Satterstrom2020	13576.s1	13576		SSC07667	SSC07661	Female	NA	NA	NA
345	DDDP107668||10_18242333_C_G	exome	NDD	DD	10_18242333_C_G	10	18242333	C	G	221074	SLC39A12	+	CDS			exonic	SLC39A12	.	nonsynonymous SNV	SLC39A12:NM_001145195:exon2:c.C128G:p.P43R,SLC39A12:NM_001282733:exon2:c.C128G:p.P43R,SLC39A12:NM_152725:exon2:c.C128G:p.P43R	T	B	B	N	N	N	T	N	T	T	T	N	0.489	-0.211	0	Heyne_2018	DDDP107668		simplex			female	NA	NA	NA
346	12261.p1||10_18250538_T_C	exome	NDD	autism	10_18250538_T_C	10	18250538	T	C	221074	SLC39A12	+	CDS||5'UTR			exonic	SLC39A12	.	nonsynonymous SNV	SLC39A12:NM_001145195:exon3:c.T290C:p.I97T,SLC39A12:NM_001282733:exon3:c.T290C:p.I97T,SLC39A12:NM_152725:exon3:c.T290C:p.I97T	T	B	B	N	D	M	T	N	T	T	T	D	13.89	0.144	0.997	Iossifov;Satterstrom2020	12261.p1	;12261		;12261.fa	;12261.mo	;Male	NA	NA	NA
347	172|Lelieveld_172||10_18250696_C_T	exome	NDD	ID;ID	10_18250696_C_T	10	18250696	C	T	221074	SLC39A12	+	CDS			exonic	SLC39A12	.	nonsynonymous SNV	SLC39A12:NM_001282734:exon2:c.C46T:p.L16F,SLC39A12:NM_001145195:exon3:c.C448T:p.L150F,SLC39A12:NM_001282733:exon3:c.C448T:p.L150F,SLC39A12:NM_152725:exon3:c.C448T:p.L150F	D	D	D	D	D	M	T	N	T	T	D	D	27.5	0.935	0.998	Heyne_2018;Lelieveld2016	172|Lelieveld_172		simplex;			male;	NA	NA	NA
348	172|Lelieveld_172||10_18250718_C_G	exome	NDD	ID;ID	10_18250718_C_G	10	18250718	C	G	221074	SLC39A12	+	CDS			exonic	SLC39A12	.	nonsynonymous SNV	SLC39A12:NM_001282734:exon2:c.C68G:p.S23C,SLC39A12:NM_001145195:exon3:c.C470G:p.S157C,SLC39A12:NM_001282733:exon3:c.C470G:p.S157C,SLC39A12:NM_152725:exon3:c.C470G:p.S157C	T	P	P	N	N	N	T	N	T	T	D	N	9.731	0.182	0.994	Heyne_2018;Lelieveld2016	172|Lelieveld_172		simplex;			male;	NA	NA	NA
349	11381.s1||10_18276412_C_T	exome	control	control	10_18276412_C_T	10	18276412	C	T	221074	SLC39A12	+	CDS			exonic	SLC39A12	.	synonymous SNV	SLC39A12:NM_001282734:exon6:c.C699T:p.Y233Y,SLC39A12:NM_001145195:exon7:c.C1101T:p.Y367Y,SLC39A12:NM_001282733:exon7:c.C1101T:p.Y367Y,SLC39A12:NM_152725:exon7:c.C1101T:p.Y367Y	.	.	.	.	.	.	.	.	.	.	.	.	.	.	.	Satterstrom2020	11381.s1	11381		SSC02421	SSC02412	Male	NA	NA	NA
350	EGAN00001101404||10_18331675_G_A	exome	NDD	autism	10_18331675_G_A	10	18331675	G	A	221074	SLC39A12	+	CDS			exonic	SLC39A12	.	nonsynonymous SNV	SLC39A12:NM_001282734:exon12:c.G1587A:p.M529I,SLC39A12:NM_152725:exon12:c.G1878A:p.M626I,SLC39A12:NM_001145195:exon13:c.G1989A:p.M663I,SLC39A12:NM_001282733:exon13:c.G1986A:p.M662I	D	B	B	N	N	N	T	N	T	T	T	D	22.4	1.048	1	Satterstrom2020	EGAN00001101404	EGAN00001101404		EGAN00001101340	EGAN00001101112	Male	NA	NA	NA
351	12853.p1||10_18903392_A_C	exome	NDD	autism	10_18903392_A_C	10	18903392	A	C	221078	NSUN6	-	CDS			exonic	NSUN6	.	nonsynonymous SNV	NSUN6:NM_001351118:exon3:c.T149G:p.L50R,NSUN6:NM_001351117:exon4:c.T416G:p.L139R,NSUN6:NM_001351115:exon5:c.T569G:p.L190R,NSUN6:NM_182543:exon5:c.T572G:p.L191R,NSUN6:NM_001351116:exon6:c.T536G:p.L179R	T	B	B	N	D	L	T	N	T	T	T	D	11.11	1.199	0.993	Iossifov;Satterstrom2020	12853.p1	;12853		;12853.fa	;12853.mo	;Male	NA	NA	NA
352	12853.s1||10_18903392_A_C	exome	control	control	10_18903392_A_C	10	18903392	A	C	221078	NSUN6	-	CDS			exonic	NSUN6	.	nonsynonymous SNV	NSUN6:NM_001351118:exon3:c.T149G:p.L50R,NSUN6:NM_001351117:exon4:c.T416G:p.L139R,NSUN6:NM_001351115:exon5:c.T569G:p.L190R,NSUN6:NM_182543:exon5:c.T572G:p.L191R,NSUN6:NM_001351116:exon6:c.T536G:p.L179R	T	B	B	N	D	L	T	N	T	T	T	D	11.11	1.199	0.993	Satterstrom2020	12853.s1	12853		12853.fa	12853.mo	Male	NA	NA	NA
353	034-07-107669||10_20023192_A_G	exome	NDD	autism	10_20023192_A_G	10	20023192	A	G			+	3'UTR			UTR3	MALRD1	NM_001142308:c.*26A>G	.	.	.	.	.	.	.	.	.	.	.	.	.	.	.	.	.	Satterstrom2020	034-07-107669	034-07-107669		035-07-107670	036-07-107671	Female	NA	NA	NA
354	DDDP100198||10_20453456_C_T	exome	NDD	DD	10_20453456_C_T	10	20453456	C	T	84898	PLXDC2	+	CDS			exonic	PLXDC2	.	synonymous SNV	PLXDC2:NM_001282736:exon6:c.C696T:p.S232S,PLXDC2:NM_032812:exon7:c.C843T:p.S281S	.	.	.	.	.	.	.	.	.	.	.	.	.	.	.	Heyne_2018	DDDP100198		simplex			male	NA	NA	NA
355	551||10_20568705_C_T	exome	NDD	ID	10_20568705_C_T	10	20568705	C	T	84898	PLXDC2	+	CDS			exonic	PLXDC2	.	nonsynonymous SNV	PLXDC2:NM_001282736:exon13:c.C1400T:p.P467L,PLXDC2:NM_032812:exon14:c.C1547T:p.P516L	T	D	D	D	D	M	T	D	T	T	T	D	25	0.935	1	Heyne_2018	551		simplex			male	NA	NA	NA
356	Lelieveld_551||10_20568705_C_T	exome	NDD	ID	10_20568705_C_T	10	20568705	C	T	84898	PLXDC2	+	CDS			exonic	PLXDC2	.	nonsynonymous SNV	PLXDC2:NM_001282736:exon13:c.C1400T:p.P467L,PLXDC2:NM_032812:exon14:c.C1547T:p.P516L	T	D	D	D	D	M	T	D	T	T	T	D	25	0.935	1	Lelieveld2016	Lelieveld_551						NA	NA	NA
357	NP147||10_21120280_T_C	exome	NDD	autism	10_21120280_T_C	10	21120280	T	C	10529	NEBL	-	intron			intronic	NEBL	.	.	.	.	.	.	.	.	.	.	.	.	.	.	.	.	.	.	Satterstrom2020	NP147	NP147		NF230	NF231	Male	NA	NA	NA
358	DDDP107056||10_21147266_T_C	exome	NDD	DD	10_21147266_T_C	10	21147266	T	C	10529	NEBL	-	CDS			exonic	NEBL	.	nonsynonymous SNV	NEBL:NM_006393:exon9:c.A806G:p.Y269C	D	D	D	D	D	M	T	D	T	T	D	D	25.8	1.061	1	Heyne_2018	DDDP107056		simplex			male	NA	NA	NA
359	00HI1320A||10_21177137_C_G	exome	NDD	autism	10_21177137_C_G	10	21177137	C	G	10529	NEBL	-	intron			splicing	NEBL	NM_006393:exon4:c.259-1G>C	.	.	.	.	.	.	D	.	.	.	.	.	.	D	25.9	0.935	0.935	Satterstrom2020	00HI1320A	00HI1320A		HI1527	00HI1526B	Female	NA	NA	NA
360	12899.s1||10_21785735_C_T	exome	control	control	10_21785735_C_T	10	21785735	C	T	399726	C10orf114	-	CDS			exonic	CASC10	.	synonymous SNV	CASC10:NM_001010911:exon1:c.G9A:p.S3S	.	.	.	.	.	.	.	.	.	.	.	.	.	.	.	Satterstrom2020	12899.s1	12899		SSC06109	SSC06102	Female	NA	NA	NA
361	DDDP114035||10_21806289_A_T	exome	NDD	DD	10_21806289_A_T	10	21806289	A	T	387640	SKIDA1	-	CDS			exonic	SKIDA1	.	nonsynonymous SNV	SKIDA1:NM_207371:exon4:c.T463A:p.S155T	T	B	B	U	N	N	.	N	T	T	D	N	4.029	1.004	0.999	Heyne_2018	DDDP114035		simplex			male	NA	NA	NA
362	DDDP110984||10_22048111_C_T	exome	NDD	DD	10_22048111_C_T	10	22048111	C	T	64215	DNAJC1	-	CDS			exonic	DNAJC1	.	synonymous SNV	DNAJC1:NM_022365:exon11:c.G1584A:p.P528P	.	.	.	.	.	.	.	.	.	.	.	.	.	.	.	Heyne_2018	DDDP110984		simplex			male	NA	NA	NA
363	14134.p1||10_23270288_T_C	exome	NDD	autism	10_23270288_T_C	10	23270288	T	C	219681	ARMC3	+	CDS			exonic	ARMC3	.	synonymous SNV	ARMC3:NM_001282747:exon6:c.T147C:p.F49F,ARMC3:NM_001282745:exon9:c.T936C:p.F312F,ARMC3:NM_001282746:exon9:c.T936C:p.F312F,ARMC3:NM_173081:exon9:c.T936C:p.F312F	.	.	.	.	.	.	.	.	.	.	.	.	.	.	.	Krumm;Satterstrom2020	14134.p1	;14134		;SSC10619	;SSC10606	;Male	NA	NA	NA
364	DDDP111434||10_23292328_C_A	exome	NDD	DD	10_23292328_C_A	10	23292328	C	A	219681	ARMC3	+	CDS			exonic	ARMC3	.	nonsynonymous SNV	ARMC3:NM_001282747:exon10:c.C927A:p.F309L,ARMC3:NM_001282745:exon13:c.C1716A:p.F572L,ARMC3:NM_001282746:exon13:c.C1716A:p.F572L,ARMC3:NM_173081:exon13:c.C1716A:p.F572L	D	D	D	D	D	M	T	D	T	D	D	D	23.9	0.017	0.998	Heyne_2018	DDDP111434		simplex			female	NA	NA	NA
365	12941.p1||10_23297836_G_C	exome	NDD	autism	10_23297836_G_C	10	23297836	G	C	219681	ARMC3	+	CDS			exonic	ARMC3	.	nonsynonymous SNV	ARMC3:NM_001282747:exon13:c.G1232C:p.S411T,ARMC3:NM_001282745:exon16:c.G2000C:p.S667T,ARMC3:NM_001282746:exon16:c.G2021C:p.S674T,ARMC3:NM_173081:exon16:c.G2021C:p.S674T	T	B	B	N	N	M	T	N	T	T	T	D	2.884	0.037	0.049	Iossifov;Satterstrom2020	12941.p1	;12941		;12941.fa	;12941.mo	;Male	NA	NA	NA
366	DDDP115681||10_24790430_G_A	exome	NDD	DD	10_24790430_G_A	10	24790430	G	A	56243	KIAA1217	+	CDS			exonic	KIAA1217	.	nonsynonymous SNV	KIAA1217:NM_001282769:exon4:c.G1006A:p.V336M,KIAA1217:NM_001282770:exon4:c.G1006A:p.V336M,KIAA1217:NM_001321681:exon5:c.G1111A:p.V371M,KIAA1217:NM_001282767:exon8:c.G1852A:p.V618M,KIAA1217:NM_001282768:exon8:c.G1852A:p.V618M,KIAA1217:NM_019590:exon9:c.G1957A:p.V653M,KIAA1217:NM_001098500:exon10:c.G1717A:p.V573M	D	D	D	N	D	M	T	N	T	T	D	D	34	1.048	0.997	Heyne_2018	DDDP115681		simplex			male	NA	NA	NA
367	12287.p1||10_24832972_C_T	exome	NDD	autism;ASD	10_24832972_C_T	10	24832972	C	T	56243	KIAA1217	+	CDS			exonic	KIAA1217	.	synonymous SNV	KIAA1217:NM_019590:exon19:c.C4773T:p.T1591T	.	.	.	.	.	.	.	.	.	.	.	.	.	.	.	Iossifov;Heyne_2018;Satterstrom2020	12287.p1	;12287	;simplex	;SSC04924	;SSC04917	;male;Male	NA	NA	NA
368	DDDP119454||10_24835092_T_C	exome	NDD	DD	10_24835092_T_C	10	24835092	T	C	56243	KIAA1217	+	CDS||3'UTR	Low_complexity	1	exonic	KIAA1217	.	synonymous SNV	KIAA1217:NM_001321681:exon14:c.T3025C:p.L1009L,KIAA1217:NM_001282768:exon18:c.T3889C:p.L1297L,KIAA1217:NM_001098500:exon19:c.T3634C:p.L1212L,KIAA1217:NM_001282767:exon19:c.T3964C:p.L1322L,KIAA1217:NM_019590:exon21:c.T5671C:p.L1891L	.	.	.	.	.	.	.	.	.	.	.	.	.	.	.	Heyne_2018	DDDP119454		simplex			female	NA	NA	NA
369	DDDP113241||10_24889820_C_A	exome	NDD	DD	10_24889820_C_A	10	24889820	C	A	57584	ARHGAP21	-	CDS			exonic	ARHGAP21	.	nonsynonymous SNV	ARHGAP21:NM_020824:exon14:c.G2887T:p.V963F	D	P	P	D	D	N	T	N	T	T	D	D	33	0.935	0.994	Heyne_2018	DDDP113241		simplex			female	NA	NA	NA
370	12645.p1||10_24896811_A_G	exome	NDD	autism	10_24896811_A_G	10	24896811	A	G	57584	ARHGAP21	-	CDS			exonic	ARHGAP21	.	nonsynonymous SNV	ARHGAP21:NM_020824:exon10:c.T2444C:p.I815T	T	B	B	D	D	L	T	N	T	T	T	D	21.2	1.199	0.995	Iossifov;SSC_Iossifov_2014	12645.p1	;12645		;12645.fa	;12645.mo	;Male	NA	NA	NA
371	DDDP117554||10_24922388_T_C	exome	NDD	DD	10_24922388_T_C	10	24922388	T	C	57584	ARHGAP21	-	CDS||5'UTR			exonic	ARHGAP21	.	nonsynonymous SNV	ARHGAP21:NM_020824:exon6:c.A383G:p.N128S	D	D	D	D	D	M	T	D	T	T	D	D	26.1	1.061	1	Heyne_2018	DDDP117554		simplex			male	NA	NA	NA
372	206-08-109925||10_26355971_G_C	exome	control	control	10_26355971_G_C	10	26355971	G	C	53904	MYO3A	+	CDS			exonic	MYO3A	.	nonsynonymous SNV	MYO3A:NM_017433:exon11:c.G1021C:p.D341H	D	D	P	D	D	M	T	D	D	D	D	D	25.1	1.048	0.988	Satterstrom2020	206-08-109925	206-08-109925		205-08-109924	204-08-109923	Female	NA	NA	NA
373	kx||10_26446266_A_G	exome	NDD	EE	10_26446266_A_G	10	26446266	A	G	53904	MYO3A	+	CDS			exonic	MYO3A	.	nonsynonymous SNV	MYO3A:NM_017433:exon26:c.A2821G:p.M941V	D	D	P	D	D	L	D	D	D	D	D	D	25.6	1.088	1	Heyne_2018	kx		simplex			female	NA	NA	NA
374	EGAN00001100993||10_26506815_A_G	exome	NDD	autism	10_26506815_A_G	10	26506815	A	G	2572	GAD2	+	CDS			exonic	GAD2	.	nonsynonymous SNV	GAD2:NM_000818:exon3:c.A181G:p.S61G,GAD2:NM_001134366:exon3:c.A181G:p.S61G	T	B	B	N	N	N	T	N	T	T	T	D	12.15	1.108	0.328	Satterstrom2020	EGAN00001100993	EGAN00001100993		EGAN00001101375	EGAN00001101346	Female	NA	NA	NA
375	AU070A||10_26589827_G_A	exome	NDD	autism	10_26589827_G_A	10	26589827	G	A	2572	GAD2	+	CDS			exonic	GAD2	.	synonymous SNV	GAD2:NM_000818:exon16:c.G1695A:p.A565A,GAD2:NM_001134366:exon16:c.G1695A:p.A565A	.	.	.	.	.	.	.	.	.	.	.	.	.	.	.	DeRubeis2014;Satterstrom2020	AU070A	;AU070A		;AU070B	;AU070C	;Male	NA	NA	NA
376	ASC_CA_164_A||10_26800831_A_G	exome	NDD	autism	10_26800831_A_G	10	26800831	A	G	54518	APBB1IP	+	CDS			exonic	APBB1IP	.	synonymous SNV	APBB1IP:NM_019043:exon7:c.A687G:p.Q229Q	.	.	.	.	.	.	.	.	.	.	.	.	.	.	.	Satterstrom2020	ASC_CA_164_A	ASC_CA_164_A		ASC_CA_164_P	ASC_CA_164_M	Male	NA	NA	NA
377	ASC_CA_118_A||10_27012811_C_G	exome	NDD	autism	10_27012811_C_G	10	27012811	C	G	23590	PDSS1	+	CDS			exonic	PDSS1	.	nonsynonymous SNV	PDSS1:NM_001321978:exon7:c.C686G:p.S229C,PDSS1:NM_001321979:exon7:c.C176G:p.S59C,PDSS1:NM_014317:exon7:c.C686G:p.S229C	T	D	P	N	D	M	T	N	T	T	D	D	24	0.013	0.997	Satterstrom2020	ASC_CA_118_A	ASC_CA_118_A		ASC_CA_118_P	ASC_CA_118_M	Male	NA	NA	NA
378	G01-GEA-57-HI||10_27342241_T_C	exome	NDD	autism	10_27342241_T_C	10	27342241	T	C	22852	ANKRD26	-	intron	Low_complexity	1	intronic	ANKRD26	.	.	.	.	.	.	.	.	.	.	.	.	.	.	.	.	.	.	Satterstrom2020	G01-GEA-57-HI	G01-GEA-57-HI		G01-GEA-57-PA	G01-GEA-57-MA	Male	NA	NA	NA
379	NDAR_INVGX358HKX_wes1||10_27366498_T_C	exome	NDD	autism	10_27366498_T_C	10	27366498	T	C	22852	ANKRD26	-	intron			intronic	ANKRD26	.	.	.	.	.	.	.	.	.	.	.	.	.	.	.	.	.	.	De_Rubeis_2014	NDAR_INVGX358HKX_wes1	NDAR_INVGX358HKX_wes1		NDAR_INVLZ196RZ5_wes1	NDAR_INVVL768HPU_wes1	Male	NA	NA	NA
380	11172.s1||10_27389202_C_T	exome	control	control	10_27389202_C_T	10	27389202	C	T	22852	ANKRD26	-	CDS			exonic	ANKRD26	.	synonymous SNV	ANKRD26:NM_001256053:exon1:c.G54A:p.R18R,ANKRD26:NM_014915:exon1:c.G54A:p.R18R	.	.	.	.	.	.	.	.	.	.	.	.	.	.	.	Iossifov;SSC_Iossifov_2014	11172.s1	;11172		;11172.fa	;11172.mo	;Female	NA	NA	NA
381	14009.p1||10_27431317_T_C	exome	NDD	autism	10_27431317_T_C	10	27431317	T	C	10730	YME1L1	-	CDS			exonic	YME1L1	.	synonymous SNV	YME1L1:NM_014263:exon4:c.A429G:p.P143P,YME1L1:NM_139312:exon5:c.A600G:p.P200P	.	.	.	.	.	.	.	.	.	.	.	.	.	.	.	Satterstrom2020	14009.p1	14009		SSC10372	SSC10366	Female	NA	NA	NA
382	DDDP101463||10_27434520_C_T	exome	NDD	DD	10_27434520_C_T	10	27434520	C	T	10730	YME1L1	-	3'UTR			splicing	YME1L1	NM_001253866:exon3:c.169-1G>A;NM_014263:exon3:c.169-1G>A;NM_139312:exon4:c.340-1G>A	.	.	.	.	.	.	D	.	.	.	.	.	.	D	25.2	0.892	0.998	Heyne_2018	DDDP101463		simplex			male	NA	NA	NA
383	08C73607||10_27454287_C_A	exome	NDD	autism	10_27454287_C_A	10	27454287	C	A	84930	MASTL	+	intron			intronic	MASTL	.	.	.	.	.	.	.	.	.	.	.	.	.	.	.	.	.	.	Satterstrom2020	08C73607	08C73607		08C73609	08C73608	Male	NA	NA	NA
384	121_proband||10_27459678_C_T	exome	NDD	bipolar_type1	10_27459678_C_T	10	27459678	C	T	84930	MASTL	+	CDS			exonic	MASTL	.	nonsynonymous SNV	MASTL:NM_001172303:exon8:c.C1790T:p.S597F,MASTL:NM_001172304:exon8:c.C1790T:p.S597F,MASTL:NM_001320756:exon8:c.C1790T:p.S597F,MASTL:NM_001320757:exon8:c.C1790T:p.S597F,MASTL:NM_032844:exon8:c.C1790T:p.S597F	T	B	B	N	N	N	T	N	T	T	T	N	13.49	-0.008	0.991	Kataoka2016	121_proband						NA	NA	NA
385	G01-GEA-28-HI||10_27538779_G_A	exome	NDD	autism	10_27538779_G_A	10	27538779	G	A	387646	LRRC37A6P	-	CDS			ncRNA_exonic	LRRC37A6P	.	.	.	.	.	.	.	.	.	.	.	.	.	.	.	.	.	.	Satterstrom2020	G01-GEA-28-HI	G01-GEA-28-HI		G01-GEA-28-PA	G01-GEA-28-MA	Male	NA	NA	NA
386	151102||10_28030345_G_C	exome	NDD	autism	10_28030345_G_C	10	28030345	G	C	283078	MKX	-	CDS			exonic	MKX	.	nonsynonymous SNV	MKX:NM_001242702:exon3:c.C277G:p.R93G,MKX:NM_173576:exon3:c.C277G:p.R93G	D	D	D	D	D	M	D	D	D	D	D	D	33	1.048	0.997	Satterstrom2020	151102	151102		151103	151104	Female	NA	NA	NA
387	NP020||10_28030357_G_A	exome	NDD	autism	10_28030357_G_A	10	28030357	G	A	283078	MKX	-	CDS			exonic	MKX	.	nonsynonymous SNV	MKX:NM_001242702:exon3:c.C265T:p.L89F,MKX:NM_173576:exon3:c.C265T:p.L89F	D	D	D	D	D	L	T	D	T	T	D	D	29.2	1.048	1	Satterstrom2020	NP020	NP020		NF147	NF020	Male	NA	NA	NA
388	16907||10_28149629_C_T	exome	NDD	EE	10_28149629_C_T	10	28149629	C	T	55130	ARMC4	-	CDS			exonic	ARMC4	.	synonymous SNV	ARMC4:NM_001290021:exon12:c.G1521A:p.A507A,ARMC4:NM_001312689:exon14:c.G2022A:p.A674A,ARMC4:NM_001290020:exon19:c.G2946A:p.A982A,ARMC4:NM_018076:exon19:c.G2946A:p.A982A	.	.	.	.	.	.	.	.	.	.	.	.	.	.	.	Heyne_2018	16907		simplex			male	NA	NA	NA
389	DDDP120308||10_28233217_G_A	exome	NDD	DD	10_28233217_G_A	10	28233217	G	A	55130	ARMC4	-	CDS			exonic	ARMC4	.	synonymous SNV	ARMC4:NM_001290021:exon5:c.C252T:p.I84I,ARMC4:NM_001312689:exon7:c.C753T:p.I251I,ARMC4:NM_001290020:exon12:c.C1677T:p.I559I,ARMC4:NM_018076:exon12:c.C1677T:p.I559I	.	.	.	.	.	.	.	.	.	.	.	.	.	.	.	Heyne_2018	DDDP120308		simplex			male	NA	NA	NA
390	DDDP101836||10_28879647_A_G	exome	NDD	DD	10_28879647_A_G	10	28879647	A	G	51322	WAC	+	intron	Low_complexity	1	splicing	WAC	NM_100264:exon6:c.363-2A>G;NM_100486:exon6:c.498-2A>G;NM_016628:exon6:c.498-2A>G	.	.	.	.	.	.	D	.	.	.	.	.	.	D	24.9	1.199	0.976	Heyne_2018	DDDP101836		simplex			female	NA	NA	NA
391	IGM1021||10_28884862_C_T	exome	NDD	autism	10_28884862_C_T	10	28884862	C	T	51322	WAC	+	CDS			exonic	WAC	.	stopgain	WAC:NM_016628:exon7:c.C811T:p.Q271X,WAC:NM_100264:exon7:c.C676T:p.Q226X	.	.	.	D	A	.	.	.	.	.	.	D	38	0.935	1	Satterstrom2020	IGM1021	IGM1021		IGM1021F	IGM1021M	Male	NA	NA	NA
392	091-05-102949||10_28900807_A_G	exome	NDD	autism	10_28900807_A_G	10	28900807	A	G	51322	WAC	+	CDS			exonic	WAC	.	nonsynonymous SNV	WAC:NM_100486:exon9:c.A1084G:p.I362V,WAC:NM_016628:exon10:c.A1393G:p.I465V,WAC:NM_100264:exon10:c.A1258G:p.I420V	T	B	B	N	N	N	T	N	T	T	T	D	22.7	1.199	1	Satterstrom2020	091-05-102949	091-05-102949		139-05-102956	126-05-102953	Male	NA	NA	NA
393	DDDP109521||10_28906677_G_C	exome	NDD	DD	10_28906677_G_C	10	28906677	G	C	51322	WAC	+	CDS			exonic	WAC	.	nonsynonymous SNV	WAC:NM_100486:exon12:c.G1529C:p.R510P,WAC:NM_016628:exon13:c.G1838C:p.R613P,WAC:NM_100264:exon13:c.G1703C:p.R568P	D	D	D	D	D	L	T	D	T	T	D	D	35	1.048	1	Heyne_2018	DDDP109521		simplex			male	NA	NA	NA
394	DDDP111406||10_28906691_C_T	exome	NDD	DD	10_28906691_C_T	10	28906691	C	T	51322	WAC	+	CDS			exonic	WAC	.	stopgain	WAC:NM_100486:exon12:c.C1543T:p.Q515X,WAC:NM_016628:exon13:c.C1852T:p.Q618X,WAC:NM_100264:exon13:c.C1717T:p.Q573X	.	.	.	D	D	.	.	.	.	.	.	D	48	0.892	1	Heyne_2018	DDDP111406		simplex			female	NA	NA	NA
395	11267.s1||10_28971295_A_G	exome	control	control	10_28971295_A_G	10	28971295	A	G	25805	BAMBI	+	CDS			exonic	BAMBI	.	nonsynonymous SNV	BAMBI:NM_012342:exon3:c.A748G:p.M250V	T	B	B	D	D	N	.	N	T	T	T	D	12.31	1.199	1	Iossifov	11267.s1						NA	NA	NA
396	13513.p1||10_293337_G_A	exome	NDD	autism	10_293337_G_A	10	293337	G	A	10771	ZMYND11	+	intron			splicing	ZMYND11	NM_006624:exon12:c.1159-1G>A;NM_001202465:exon10:c.904-1G>A;NM_001202466:exon11:c.994-1G>A;NM_212479:exon12:c.1156-1G>A;NM_001330057:exon13:c.1108-1G>A;NM_001202464:exon11:c.997-1G>A;NM_001202468:exon11:c.1159-1G>A;NM_001202467:exon10:c.997-1G>A	.	.	.	.	.	.	.	.	.	.	.	.	.	D	27.6	1.048	1	Iossifov;Satterstrom2020	13513.p1	;13513		;SSC08199	;SSC07972	;Male	NA	NA	NA
397	DDDP112679||10_294310_G_A	exome	NDD	DD	10_294310_G_A	10	294310	G	A	10771	ZMYND11	+	CDS			exonic	ZMYND11	.	nonsynonymous SNV	ZMYND11:NM_001202465:exon11:c.G1007A:p.S336N,ZMYND11:NM_001202467:exon11:c.G1100A:p.S367N,ZMYND11:NM_001202464:exon12:c.G1100A:p.S367N,ZMYND11:NM_001202466:exon12:c.G1097A:p.S366N,ZMYND11:NM_001202468:exon12:c.G1262A:p.S421N,ZMYND11:NM_006624:exon13:c.G1262A:p.S421N,ZMYND11:NM_212479:exon13:c.G1259A:p.S420N,ZMYND11:NM_001330057:exon14:c.G1211A:p.S404N	T	D	D	D	.	L	.	N	T	T	T	D	24.1	1.048	0.998	Heyne_2018	DDDP112679		simplex			female	NA	NA	NA
398	DDDP112346||10_294525_G_A	exome	NDD	DD	10_294525_G_A	10	294525	G	A	10771	ZMYND11	+	CDS			exonic	ZMYND11	.	nonsynonymous SNV	ZMYND11:NM_001202465:exon11:c.G1222A:p.V408I,ZMYND11:NM_001202467:exon11:c.G1315A:p.V439I,ZMYND11:NM_001202464:exon12:c.G1315A:p.V439I,ZMYND11:NM_001202466:exon12:c.G1312A:p.V438I,ZMYND11:NM_001202468:exon12:c.G1477A:p.V493I,ZMYND11:NM_006624:exon13:c.G1477A:p.V493I,ZMYND11:NM_212479:exon13:c.G1474A:p.V492I,ZMYND11:NM_001330057:exon14:c.G1426A:p.V476I	T	B	B	D	.	N	.	N	T	T	T	D	12.67	1.048	0.008	Heyne_2018	DDDP112346		simplex			male	NA	NA	NA
399	DDDP112171||10_29752475_G_A	exome	NDD	DD	10_29752475_G_A	10	29752475	G	A	6840	SVIL	-	CDS			exonic	SVIL	.	nonsynonymous SNV	SVIL:NM_003174:exon33:c.C4945T:p.R1649C,SVIL:NM_001323600:exon34:c.C5041T:p.R1681C,SVIL:NM_021738:exon35:c.C6223T:p.R2075C,SVIL:NM_001323599:exon36:c.C5293T:p.R1765C	D	B	B	D	D	M	T	D	T	T	D	D	24.2	-0.444	0.16	Heyne_2018	DDDP112171		simplex			female	NA	NA	NA
400	1255JS0030||10_29769625_C_A	exome	NDD	autism	10_29769625_C_A	10	29769625	C	A	6840	SVIL	-	CDS			exonic	SVIL	.	stopgain	SVIL:NM_003174:exon27:c.G3940T:p.E1314X,SVIL:NM_001323600:exon28:c.G4036T:p.E1346X,SVIL:NM_021738:exon29:c.G5218T:p.E1740X,SVIL:NM_001323599:exon30:c.G4288T:p.E1430X	.	.	.	D	A	.	.	.	.	.	.	D	40	0.79	0.958	DeRubeis2014;ASC_Neale2012	1255JS0030	;1255JS0030		;1255JS0033	;1255JS0031	;Male	NA	NA	NA
401	11328.p1||10_29773544_A_T	exome	NDD	autism	10_29773544_A_T	10	29773544	A	T	6840	SVIL	-	intron			ncRNA_exonic	SVIL-AS1	.	.	.	.	.	.	.	.	.	.	.	.	.	.	.	.	.	.	Satterstrom2020	11328.p1	11328		11328.fa	11328.mo	Male	NA	NA	NA
402	13965.p1||10_29782250_A_G	exome	NDD	autism	10_29782250_A_G	10	29782250	A	G	6840	SVIL	-	CDS			exonic	SVIL	.	synonymous SNV	SVIL:NM_003174:exon19:c.T2634C:p.D878D,SVIL:NM_001323600:exon20:c.T2730C:p.D910D,SVIL:NM_021738:exon21:c.T3912C:p.D1304D,SVIL:NM_001323599:exon22:c.T2982C:p.D994D	.	.	.	.	.	.	.	.	.	.	.	.	.	.	.	Satterstrom2020	13965.p1	13965		13965.fa	13965.mo	Male	NA	NA	NA
403	DDDP104973||10_29812870_G_A	exome	NDD	DD	10_29812870_G_A	10	29812870	G	A	6840	SVIL	-	CDS			exonic	SVIL	.	synonymous SNV	SVIL:NM_003174:exon13:c.C1395T:p.A465A,SVIL:NM_001323600:exon14:c.C1491T:p.A497A,SVIL:NM_021738:exon15:c.C2673T:p.A891A,SVIL:NM_001323599:exon16:c.C1743T:p.A581A	.	.	.	.	.	.	.	.	.	.	.	.	.	.	.	Heyne_2018	DDDP104973		simplex			female	NA	NA	NA
404	10C117695||10_29813465_G_A	exome	control	control	10_29813465_G_A	10	29813465	G	A	6840	SVIL	-	CDS			exonic	SVIL	.	nonsynonymous SNV	SVIL:NM_003174:exon12:c.C1244T:p.T415M,SVIL:NM_001323600:exon13:c.C1340T:p.T447M,SVIL:NM_021738:exon14:c.C2522T:p.T841M,SVIL:NM_001323599:exon15:c.C1592T:p.T531M	T	B	B	N	N	N	T	N	T	T	T	N	4.193	-0.158	0.088	Satterstrom2020	10C117695	10C117695		C1468::11C118409	10C117694	Male	NA	NA	NA
405	DDDP111906||10_298321_T_C	exome	NDD	DD	10_298321_T_C	10	298321	T	C	10771	ZMYND11	+	CDS			exonic	ZMYND11	.	nonsynonymous SNV	ZMYND11:NM_001202465:exon13:c.T1465C:p.C489R,ZMYND11:NM_001202464:exon14:c.T1558C:p.C520R,ZMYND11:NM_001202466:exon14:c.T1555C:p.C519R,ZMYND11:NM_006624:exon15:c.T1720C:p.C574R,ZMYND11:NM_001330057:exon16:c.T1669C:p.C557R	D	D	D	D	.	M	.	D	D	D	D	D	27.5	0.986	1	Heyne_2018	DDDP111906		simplex			male	NA	NA	NA
406	DDDP106289||10_298399_C_T	exome	NDD	DD	10_298399_C_T	10	298399	C	T	10771	ZMYND11	+	CDS			exonic	ZMYND11	.	nonsynonymous SNV	ZMYND11:NM_001202465:exon13:c.C1543T:p.R515W,ZMYND11:NM_001202464:exon14:c.C1636T:p.R546W,ZMYND11:NM_001202466:exon14:c.C1633T:p.R545W,ZMYND11:NM_006624:exon15:c.C1798T:p.R600W,ZMYND11:NM_001330057:exon16:c.C1747T:p.R583W	D	D	D	D	.	L	.	D	D	T	D	D	34	0.87	0.998	Heyne_2018	DDDP106289		simplex			female	NA	NA	NA
407	DDDP110835||10_298399_C_T	exome	NDD	DD	10_298399_C_T	10	298399	C	T	10771	ZMYND11	+	CDS			exonic	ZMYND11	.	nonsynonymous SNV	ZMYND11:NM_001202465:exon13:c.C1543T:p.R515W,ZMYND11:NM_001202464:exon14:c.C1636T:p.R546W,ZMYND11:NM_001202466:exon14:c.C1633T:p.R545W,ZMYND11:NM_006624:exon15:c.C1798T:p.R600W,ZMYND11:NM_001330057:exon16:c.C1747T:p.R583W	D	D	D	D	.	L	.	D	D	T	D	D	34	0.87	0.998	Heyne_2018	DDDP110835		simplex			male	NA	NA	NA
408	Halvardson_Fam7||10_298399_C_T	exome	NDD	ID	10_298399_C_T	10	298399	C	T	10771	ZMYND11	+	CDS			exonic	ZMYND11	.	nonsynonymous SNV	ZMYND11:NM_001202465:exon13:c.C1543T:p.R515W,ZMYND11:NM_001202464:exon14:c.C1636T:p.R546W,ZMYND11:NM_001202466:exon14:c.C1633T:p.R545W,ZMYND11:NM_006624:exon15:c.C1798T:p.R600W,ZMYND11:NM_001330057:exon16:c.C1747T:p.R583W	D	D	D	D	.	L	.	D	D	T	D	D	34	0.87	0.998	Halvardson2016	Halvardson_Fam7						NA	NA	NA
409	DDDP117912||10_29843848_G_A	exome	NDD	DD	10_29843848_G_A	10	29843848	G	A	6840	SVIL	-	CDS			exonic	SVIL	.	synonymous SNV	SVIL:NM_021738:exon5:c.C24T:p.A8A,SVIL:NM_001323599:exon7:c.C24T:p.A8A,SVIL:NM_001323600:exon7:c.C24T:p.A8A,SVIL:NM_003174:exon7:c.C24T:p.A8A	.	.	.	.	.	.	.	.	.	.	.	.	.	.	.	Heyne_2018	DDDP117912		simplex			male	NA	NA	NA
410	3301-1||10_30318177_C_T	exome	NDD	schizophrenia	10_30318177_C_T	10	30318177	C	T	57608	KIAA1462	-	CDS			exonic	JCAD	.	synonymous SNV	JCAD:NM_020848:exon3:c.G900A:p.S300S,JCAD:NM_001350001:exon4:c.G486A:p.S162S,JCAD:NM_001350021:exon4:c.G486A:p.S162S,JCAD:NM_001350022:exon4:c.G900A:p.S300S	.	.	.	.	.	.	.	.	.	.	.	.	.	.	.	Fromer2014	3301-1						NA	NA	NA
411	ahr||10_30748380_G_A	exome	NDD	EE	10_30748380_G_A	10	30748380	G	A	1326	MAP3K8	+	CDS			exonic	MAP3K8	.	nonsynonymous SNV	MAP3K8:NM_001244134:exon7:c.G1223A:p.R408H,MAP3K8:NM_001320961:exon7:c.G1223A:p.R408H,MAP3K8:NM_005204:exon8:c.G1223A:p.R408H	D	D	B	D	N	N	T	N	T	T	D	D	23.5	1.037	0.998	Heyne_2018	ahr		simplex			male	NA	NA	NA
412	DDDP100414||10_30749699_C_T	exome	NDD	DD	10_30749699_C_T	10	30749699	C	T	1326	MAP3K8	+	CDS			exonic	MAP3K8	.	synonymous SNV	MAP3K8:NM_001244134:exon8:c.C1338T:p.I446I,MAP3K8:NM_001320961:exon8:c.C1338T:p.I446I,MAP3K8:NM_005204:exon9:c.C1338T:p.I446I	.	.	.	.	.	.	.	.	.	.	.	.	.	.	.	Heyne_2018	DDDP100414		simplex			male	NA	NA	NA
413	EGAN00001100900||10_3111547_G_A	exome	NDD	autism	10_3111547_G_A	10	3111547	G	A	5214	PFKP	+	5'UTR			UTR5	PFKP	NM_001323071:c.-13035G>A;NM_001323072:c.-13035G>A;NM_001242339:c.-27G>A;NM_001345944:c.-13035G>A	.	.	.	.	.	.	.	.	.	.	.	.	.	.	.	.	.	Satterstrom2020	EGAN00001100900	EGAN00001100900		EGAN00001100899	EGAN00001100986	Male	NA	NA	NA
414	AU238A||10_31138594_G_A	exome	NDD	autism	10_31138594_G_A	10	31138594	G	A	220929	ZNF438	-	CDS			exonic	ZNF438	.	nonsynonymous SNV	ZNF438:NM_001143767:exon5:c.C740T:p.T247I,ZNF438:NM_001143768:exon6:c.C740T:p.T247I,ZNF438:NM_001143766:exon7:c.C740T:p.T247I,ZNF438:NM_001143769:exon7:c.C593T:p.T198I,ZNF438:NM_001143771:exon7:c.C710T:p.T237I,ZNF438:NM_182755:exon7:c.C740T:p.T247I,ZNF438:NM_001143770:exon8:c.C710T:p.T237I	T	B	B	N	N	N	T	N	T	T	T	N	0.446	1.048	0.001	DeRubeis2014;Satterstrom2020	AU238A	;AU238A		;AU238B	;AU238C	;Male	NA	NA	NA
415	09C83023||10_3124608_G_A	exome	NDD	autism	10_3124608_G_A	10	3124608	G	A	5214	PFKP	+	CDS			exonic	PFKP	.	nonsynonymous SNV	PFKP:NM_001242339:exon3:c.G37A:p.A13T	D	P	B	.	D	.	T	N	T	T	D	D	9.272	0.129	0.926	DeRubeis2014;Satterstrom2020	09C83023	;09C83023		;09C83021	;09C83022	;Male	NA	NA	NA
416	11026.s1||10_3124663_T_G	exome	control	control	10_3124663_T_G	10	3124663	T	G	5214	PFKP	+	intron			intronic	PFKP	.	.	.	.	.	.	.	.	.	.	.	.	.	.	.	.	.	.	Iossifov;Satterstrom2020	11026.s1	;11026		;SSC00328	;SSC00327	;Male	NA	NA	NA
417	TAS_F5011Y||10_3141473_C_T	exome	NDD	autism	10_3141473_C_T	10	3141473	C	T	5214	PFKP	+	CDS			exonic	PFKP	.	stopgain	PFKP:NM_001323067:exon3:c.C112T:p.Q38X,PFKP:NM_001323068:exon3:c.C193T:p.Q65X,PFKP:NM_001345944:exon3:c.C79T:p.Q27X,PFKP:NM_002627:exon3:c.C193T:p.Q65X,PFKP:NM_001323071:exon4:c.C79T:p.Q27X,PFKP:NM_001323072:exon4:c.C79T:p.Q27X	T	B	B	.	A	.	D	N	T	T	.	D	39	0.852	0.997	Satterstrom2020	TAS_F5011Y	TAS_F5011Y		TAS_F5011YA	TAS_F5011YB	Male	NA	NA	NA
418	DEASD_1029_001||10_3143688_C_G	exome	NDD	autism	10_3143688_C_G	10	3143688	C	G	5214	PFKP	+	CDS			exonic	PFKP	.	synonymous SNV	PFKP:NM_001323067:exon4:c.C315G:p.T105T,PFKP:NM_001323068:exon4:c.C396G:p.T132T,PFKP:NM_001345944:exon4:c.C282G:p.T94T,PFKP:NM_002627:exon4:c.C396G:p.T132T,PFKP:NM_001323071:exon5:c.C282G:p.T94T,PFKP:NM_001323072:exon5:c.C282G:p.T94T,PFKP:NM_001242339:exon6:c.C372G:p.T124T	.	.	.	.	.	.	.	.	.	.	.	.	.	.	.	Satterstrom2020	DEASD_1029_001	DEASD_1029_001		DEASD_1029_500	DEASD_1029_600	Male	NA	NA	NA
419	DDDP101432||10_3176717_A_G	exome	NDD	DD	10_3176717_A_G	10	3176717	A	G	5214	PFKP	+	CDS			exonic	PFKP	.	nonsynonymous SNV	PFKP:NM_001323070:exon14:c.A1264G:p.I422V,PFKP:NM_001323074:exon15:c.A1417G:p.I473V,PFKP:NM_001323073:exon16:c.A1417G:p.I473V,PFKP:NM_001323068:exon19:c.A1912G:p.I638V,PFKP:NM_001323067:exon20:c.A1984G:p.I662V,PFKP:NM_001323069:exon20:c.A1558G:p.I520V,PFKP:NM_001345944:exon20:c.A1951G:p.I651V,PFKP:NM_002627:exon20:c.A2065G:p.I689V,PFKP:NM_001323071:exon21:c.A1951G:p.I651V,PFKP:NM_001323072:exon21…	D	B	B	D	D	N	T	N	T	T	T	D	15.96	1.193	0.984	Heyne_2018	DDDP101432		simplex			male	NA	NA	NA
420	DDDP120136||10_3176766_G_A	exome	NDD	DD	10_3176766_G_A	10	3176766	G	A	5214	PFKP	+	CDS			exonic	PFKP	.	nonsynonymous SNV	PFKP:NM_001323070:exon14:c.G1313A:p.R438Q,PFKP:NM_001323074:exon15:c.G1466A:p.R489Q,PFKP:NM_001323073:exon16:c.G1466A:p.R489Q,PFKP:NM_001323068:exon19:c.G1961A:p.R654Q,PFKP:NM_001323067:exon20:c.G2033A:p.R678Q,PFKP:NM_001323069:exon20:c.G1607A:p.R536Q,PFKP:NM_001345944:exon20:c.G2000A:p.R667Q,PFKP:NM_002627:exon20:c.G2114A:p.R705Q,PFKP:NM_001323071:exon21:c.G2000A:p.R667Q,PFKP:NM_001323072:exon21…	T	B	B	N	N	N	T	N	T	T	T	N	0.122	-3.203	0	Heyne_2018	DDDP120136		simplex			male	NA	NA	NA
421	13532.p1||10_31803658_A_G	exome	NDD	autism	10_31803658_A_G	10	31803658	A	G	6935	ZEB1	+	intron			intronic	ZEB1	.	.	.	.	.	.	.	.	.	.	.	.	.	.	.	.	.	.	Satterstrom2020	13532.p1	13532		4839	4871	Male	NA	NA	NA
422	13266.s1||10_3180381_C_T	exome	control	control	10_3180381_C_T	10	3180381	C	T	10531	PITRM1	-	3'UTR			intronic	PITRM1	.	.	.	.	.	.	.	.	.	.	.	.	.	.	.	.	.	.	Satterstrom2020	13266.s1	13266		SSC07024	SSC07019	Female	NA	NA	NA
423	DDDP115217||10_31809698_C_T	exome	NDD	DD	10_31809698_C_T	10	31809698	C	T	6935	ZEB1	+	CDS			exonic	ZEB1	.	nonsynonymous SNV	ZEB1:NM_001323674:exon5:c.C1213T:p.L405F,ZEB1:NM_001323675:exon5:c.C1171T:p.L391F,ZEB1:NM_001323678:exon5:c.C1162T:p.L388F,ZEB1:NM_001174093:exon6:c.C1375T:p.L459F,ZEB1:NM_001174095:exon6:c.C1234T:p.L412F,ZEB1:NM_001323644:exon6:c.C781T:p.L261F,ZEB1:NM_001128128:exon7:c.C1387T:p.L463F,ZEB1:NM_001174094:exon7:c.C1384T:p.L462F,ZEB1:NM_001174096:exon7:c.C1438T:p.L480F,ZEB1:NM_001323641:exon7:c.C781T…	D	D	D	D	D	M	D	N	D	D	D	D	25.2	0.852	1	Heyne_2018	DDDP115217		simplex			male	NA	NA	NA
424	1167-1||10_31815671_C_T	exome	NDD	schizophrenia	10_31815671_C_T	10	31815671	C	T	6935	ZEB1	+	CDS			exonic	ZEB1	.	stopgain	ZEB1:NM_001323674:exon7:c.C2632T:p.R878X,ZEB1:NM_001323675:exon7:c.C2590T:p.R864X,ZEB1:NM_001323678:exon7:c.C2581T:p.R861X,ZEB1:NM_001174093:exon8:c.C2794T:p.R932X,ZEB1:NM_001174095:exon8:c.C2653T:p.R885X,ZEB1:NM_001323644:exon8:c.C2200T:p.R734X,ZEB1:NM_001128128:exon9:c.C2806T:p.R936X,ZEB1:NM_001174094:exon9:c.C2803T:p.R935X,ZEB1:NM_001174096:exon9:c.C2857T:p.R953X,ZEB1:NM_001323641:exon9:c.C220…	.	.	.	D	D	.	.	.	.	.	.	D	46	0.048	0.831	Fromer2014	1167-1						NA	NA	NA
425	ASDFI_1010||10_3185641_G_A	exome	NDD	autism	10_3185641_G_A	10	3185641	G	A	10531	PITRM1	-	CDS			exonic	PITRM1	.	nonsynonymous SNV	PITRM1:NM_001242309:exon20:c.C2291T:p.P764L,PITRM1:NM_001347725:exon21:c.C2387T:p.P796L,PITRM1:NM_001347726:exon21:c.C1772T:p.P591L,PITRM1:NM_001347730:exon21:c.C2363T:p.P788L,PITRM1:NM_001242307:exon23:c.C2588T:p.P863L,PITRM1:NM_001347727:exon23:c.C1970T:p.P657L,PITRM1:NM_001347728:exon23:c.C1280T:p.P427L,PITRM1:NM_001347729:exon23:c.C2561T:p.P854L,PITRM1:NM_014889:exon23:c.C2585T:p.P862L	D	D	B	D	D	M	T	D	T	T	D	D	25.1	-0.279	0.122	DeRubeis2014;Satterstrom2020	ASDFI_1010	;ASDFI_1010		;ASDFI_1012	;ASDFI_1011	;Male	NA	NA	NA
426	NDAR_INVNJ868AE5_wes1||10_3191849_C_G	exome	control	control	10_3191849_C_G	10	3191849	C	G	10531	PITRM1	-	CDS			exonic	PITRM1	.	nonsynonymous SNV	PITRM1:NM_001242309:exon15:c.G1739C:p.R580T,PITRM1:NM_001242307:exon16:c.G1835C:p.R612T,PITRM1:NM_001347725:exon16:c.G1835C:p.R612T,PITRM1:NM_001347726:exon16:c.G1220C:p.R407T,PITRM1:NM_001347727:exon16:c.G1220C:p.R407T,PITRM1:NM_001347728:exon16:c.G530C:p.R177T,PITRM1:NM_001347729:exon16:c.G1811C:p.R604T,PITRM1:NM_001347730:exon16:c.G1811C:p.R604T,PITRM1:NM_014889:exon16:c.G1835C:p.R612T	D	B	B	D	N	M	T	D	T	T	T	D	22.1	0.067	0.29	De_Rubeis_2014	NDAR_INVNJ868AE5_wes1	NDAR_INVNJ868AE5_wes1		NDAR_INVKB079LT8_wes1	NDAR_INVMV424UWR_wes1	Male	NA	NA	NA
427	11977.s1||10_3207621_G_A	exome	control	control	10_3207621_G_A	10	3207621	G	A	10531	PITRM1	-	CDS			exonic	PITRM1	.	nonsynonymous SNV	PITRM1:NM_001242309:exon4:c.C421T:p.R141C,PITRM1:NM_001242307:exon5:c.C517T:p.R173C,PITRM1:NM_001347725:exon5:c.C517T:p.R173C,PITRM1:NM_001347729:exon5:c.C493T:p.R165C,PITRM1:NM_001347730:exon5:c.C493T:p.R165C,PITRM1:NM_014889:exon5:c.C517T:p.R173C	D	D	P	D	D	M	T	D	T	T	D	D	33	0.04	0.254	Iossifov;Satterstrom2020	11977.s1	;11977		;SSC03769	;SSC03767	;Female	NA	NA	NA
428	12673.s1||10_32106768_T_C	exome	control	control	10_32106768_T_C	10	32106768	T	C	94134	ARHGAP12	-	CDS			exonic	ARHGAP12	.	nonsynonymous SNV	ARHGAP12:NM_001270699:exon9:c.A1523G:p.D508G,ARHGAP12:NM_001270698:exon10:c.A1448G:p.D483G,ARHGAP12:NM_001270696:exon11:c.A1589G:p.D530G,ARHGAP12:NM_001270695:exon12:c.A1664G:p.D555G,ARHGAP12:NM_001270697:exon12:c.A1538G:p.D513G,ARHGAP12:NM_018287:exon13:c.A1679G:p.D560G	D	D	D	D	D	M	T	D	D	D	D	D	24	1.061	0.982	Iossifov;SSC_Iossifov_2014	12673.s1	;12673		;12673.fa	;12673.mo	;Male	NA	NA	NA
429	12798.s1||10_32307134_A_G	exome	control	control	10_32307134_A_G	10	32307134	A	G	3799	KIF5B	-	intron			intronic	KIF5B	.	.	.	.	.	.	.	.	.	.	.	.	.	.	.	.	.	.	Satterstrom2020	12798.s1	12798		SSC04947	SSC04944	Female	NA	NA	NA
430	DDDP111090||10_32344838_C_T	exome	NDD	DD	10_32344838_C_T	10	32344838	C	T	3799	KIF5B	-	CDS			exonic	KIF5B	.	nonsynonymous SNV	KIF5B:NM_004521:exon1:c.G64A:p.E22K	D	D	D	D	D	H	T	D	D	D	D	D	34	0.935	0.992	Heyne_2018	DDDP111090		simplex			female	NA	NA	NA
431	10C111564||10_32576111_G_A	exome	control	control	10_32576111_G_A	10	32576111	G	A	80314	EPC1	-	CDS			exonic	EPC1	.	nonsynonymous SNV	EPC1:NM_001272004:exon7:c.C1067T:p.T356M,EPC1:NM_001272019:exon7:c.C854T:p.T285M,EPC1:NM_001282391:exon7:c.C917T:p.T306M,EPC1:NM_025209:exon7:c.C1067T:p.T356M	T	D	P	N	D	L	T	N	T	T	D	D	22.7	0.017	0.998	Satterstrom2020	10C111564	10C111564		10C111562	10C111563	Male	NA	NA	NA
432	AC02-1234-04||10_32780873_C_T	exome	control	control	10_32780873_C_T	10	32780873	C	T	221016	CCDC7	+	CDS			exonic	CCDC7	.	stopgain	CCDC7:NM_001026383:exon10:c.C820T:p.R274X,CCDC7:NM_001321115:exon10:c.C820T:p.R274X,CCDC7:NM_145023:exon10:c.C820T:p.R274X	.	.	.	.	A	.	.	.	.	.	.	N	35	0.789	0.032	Satterstrom2020	AC02-1234-04	AC02-1234-04		AC02-1234-02	AC02-1234-03	Male	NA	NA	NA
433	08C76846||10_33134808_T_A	exome	NDD	autism	10_33134808_T_A	10	33134808	T	A	79741	C10orf68	+	CDS			exonic	CCDC7	.	synonymous SNV	CCDC7:NM_001321115:exon37:c.T3525A:p.T1175T	.	.	.	.	.	.	.	.	.	.	.	.	.	.	.	Satterstrom2020	08C76846	08C76846		08C76845	08C76844	Male	NA	NA	NA
434	tavassoli2014_sample1||10_33134808_T_A	exome	NDD	autism	10_33134808_T_A	10	33134808	T	A	79741	C10orf68	+	CDS			exonic	CCDC7	.	synonymous SNV	CCDC7:NM_001321115:exon37:c.T3525A:p.T1175T	.	.	.	.	.	.	.	.	.	.	.	.	.	.	.	Tavassoli2014	tavassoli2014_sample1						NA	NA	NA
435	25325.p1||10_33140834_T_G	exome	NDD	tourette_syndrome	10_33140834_T_G	10	33140834	T	G	79741	C10orf68	+	CDS			exonic	CCDC7	.	nonsynonymous SNV	CCDC7:NM_001321115:exon41:c.T3995G:p.L1332R	D	P	P	.	N	N	T	D	T	T	T	N	22.7	0.784	0.077	Willsey2017	25325.p1						NA	NA	NA
436	11568.p1||10_33200439_G_A	exome	NDD	autism	10_33200439_G_A	10	33200439	G	A	3688	ITGB1	-	CDS			exonic	ITGB1	.	nonsynonymous SNV	ITGB1:NM_033668:exon12:c.C1868T:p.P623L,ITGB1:NM_002211:exon13:c.C1868T:p.P623L,ITGB1:NM_133376:exon13:c.C1868T:p.P623L	D	P	B	D	D	M	T	D	T	T	T	D	23.7	1.048	0.832	Krumm;Satterstrom2020	11568.p1	;11568		;68617	;68619	;Female	NA	NA	NA
437	DDDP113170||10_33201039_G_A	exome	NDD	DD	10_33201039_G_A	10	33201039	G	A	3688	ITGB1	-	CDS			exonic	ITGB1	.	nonsynonymous SNV	ITGB1:NM_033668:exon11:c.C1483T:p.R495C,ITGB1:NM_002211:exon12:c.C1483T:p.R495C,ITGB1:NM_133376:exon12:c.C1483T:p.R495C	T	D	D	D	D	H	T	D	D	D	D	D	34	1.048	0.993	Heyne_2018	DDDP113170		simplex			female	NA	NA	NA
438	DDDP111585||10_33211231_G_A	exome	NDD	DD	10_33211231_G_A	10	33211231	G	A	3688	ITGB1	-	CDS			exonic	ITGB1	.	nonsynonymous SNV	ITGB1:NM_033668:exon8:c.C1082T:p.S361F,ITGB1:NM_002211:exon9:c.C1082T:p.S361F,ITGB1:NM_133376:exon9:c.C1082T:p.S361F	D	D	D	D	D	H	D	D	D	D	D	D	34	1.048	0.999	Heyne_2018	DDDP111585		simplex			female	NA	NA	NA
439	14405.s1||10_33224471_T_C	exome	control	control	10_33224471_T_C	10	33224471	T	C	3688	ITGB1	-	CDS			exonic	ITGB1	.	nonsynonymous SNV	ITGB1:NM_033668:exon1:c.A16G:p.I6V,ITGB1:NM_002211:exon2:c.A16G:p.I6V,ITGB1:NM_133376:exon2:c.A16G:p.I6V	T	B	B	N	N	N	D	N	T	D	D	N	0.005	-0.216	0.083	Iossifov;Satterstrom2020	14405.s1	;14405		;36156	;36158	;Male	NA	NA	NA
440	DDDP111620||10_33475258_G_A	exome	NDD	DD	10_33475258_G_A	10	33475258	G	A	8829	NRP1	-	CDS			exonic	NRP1	.	nonsynonymous SNV	NRP1:NM_001244972:exon14:c.C2203T:p.R735C,NRP1:NM_001244973:exon14:c.C2200T:p.R734C,NRP1:NM_001330068:exon14:c.C2221T:p.R741C,NRP1:NM_003873:exon14:c.C2221T:p.R741C	D	D	P	D	D	M	T	N	T	T	T	D	35	1.048	0.993	Heyne_2018	DDDP111620		simplex			male	NA	NA	NA
441	DDDP117218||10_34620067_A_G	exome	NDD	DD	10_34620067_A_G	10	34620067	A	G	56288	PARD3	-	CDS			exonic	PARD3	.	synonymous SNV	PARD3:NM_001184791:exon16:c.T2595C:p.D865D,PARD3:NM_001184790:exon17:c.T2550C:p.D850D,PARD3:NM_001184786:exon18:c.T2772C:p.D924D,PARD3:NM_001184788:exon18:c.T2682C:p.D894D,PARD3:NM_001184789:exon18:c.T2682C:p.D894D,PARD3:NM_001184794:exon18:c.T2682C:p.D894D,PARD3:NM_001184785:exon19:c.T2811C:p.D937D,PARD3:NM_001184787:exon19:c.T2820C:p.D940D,PARD3:NM_001184792:exon19:c.T2811C:p.D937D,PARD3:NM_001…	.	.	.	.	.	.	.	.	.	.	.	.	.	.	.	Heyne_2018	DDDP117218		simplex			male	NA	NA	NA
442	14323.p1||10_34661419_C_T	exome	NDD	autism	10_34661419_C_T	10	34661419	C	T	56288	PARD3	-	intron			intronic	PARD3	.	.	.	.	.	.	.	.	.	.	.	.	.	.	.	.	.	.	Iossifov;SSC_Iossifov_2014	14323.p1	;14323		;14323.fa	;14323.mo	;Male	NA	NA	NA
443	gl||10_35360225_T_C	exome	NDD	EE	10_35360225_T_C	10	35360225	T	C	8453	CUL2	-	CDS||5'UTR			exonic	CUL2	.	synonymous SNV	CUL2:NM_001198777:exon2:c.A21G:p.V7V,CUL2:NM_001198778:exon2:c.A78G:p.V26V,CUL2:NM_001198779:exon2:c.A60G:p.V20V,CUL2:NM_001324375:exon2:c.A21G:p.V7V,CUL2:NM_003591:exon2:c.A21G:p.V7V	.	.	.	.	.	.	.	.	.	.	.	.	.	.	.	Heyne_2018	gl		simplex			male	NA	NA	NA
444	09C82225||10_35500293_C_T	exome	NDD	autism	10_35500293_C_T	10	35500293	C	T	1390	CREM	+	CDS			exonic	CREM	.	synonymous SNV	CREM:NM_182720:exon3:c.C294T:p.A98A,CREM:NM_182721:exon3:c.C306T:p.A102A,CREM:NM_182717:exon4:c.C330T:p.A110A,CREM:NM_182723:exon4:c.C276T:p.A92A,CREM:NM_183012:exon6:c.C678T:p.A226A,CREM:NM_183011:exon7:c.C867T:p.A289A,CREM:NM_183013:exon8:c.C714T:p.A238A	.	.	.	.	.	.	.	.	.	.	.	.	.	.	.	DeRubeis2014;Satterstrom2020	09C82225	;09C82225		;09C82227	;09C82226	;Male	NA	NA	NA
445	300|Lelieveld_300||10_35819099_G_A	exome	NDD	ID;ID	10_35819099_G_A	10	35819099	G	A	219771	CCNY	+	CDS			exonic	CCNY	.	synonymous SNV	CCNY:NM_001282854:exon5:c.G108A:p.K36K,CCNY:NM_001282852:exon6:c.G432A:p.K144K,CCNY:NM_145012:exon7:c.G507A:p.K169K,CCNY:NM_001282853:exon8:c.G345A:p.K115K,CCNY:NM_181698:exon9:c.G345A:p.K115K	.	.	.	.	.	.	.	.	.	.	.	.	.	.	.	Heyne_2018;Lelieveld2016	300|Lelieveld_300		simplex;			male;	NA	NA	NA
446	DDDP112002||10_35819162_C_T	exome	NDD	DD	10_35819162_C_T	10	35819162	C	T	219771	CCNY	+	CDS			exonic	CCNY	.	synonymous SNV	CCNY:NM_001282854:exon5:c.C171T:p.I57I,CCNY:NM_001282852:exon6:c.C495T:p.I165I,CCNY:NM_145012:exon7:c.C570T:p.I190I,CCNY:NM_001282853:exon8:c.C408T:p.I136I,CCNY:NM_181698:exon9:c.C408T:p.I136I	.	.	.	.	.	.	.	.	.	.	.	.	.	.	.	Heyne_2018	DDDP112002		simplex			male	NA	NA	NA
447	08C77878||10_35855145_C_T	exome	NDD	autism	10_35855145_C_T	10	35855145	C	T	219771	CCNY	+	intron			intronic	CCNY	.	.	.	.	.	.	.	.	.	.	.	.	.	.	.	.	.	.	Satterstrom2020	08C77878	08C77878		08C77880	08C77879	Male	NA	NA	NA
448	av||10_375387_T_C	exome	NDD	EE	10_375387_T_C	10	375387	T	C	22982	DIP2C	-	CDS			exonic	DIP2C	.	nonsynonymous SNV	DIP2C:NM_014974:exon30:c.A3739G:p.T1247A	T	B	B	D	D	L	T	N	T	T	T	D	23.6	1.061	0.912	Heyne_2018	av		simplex			male	NA	NA	NA
449	13277.s1||10_375509_G_A	exome	control	control	10_375509_G_A	10	375509	G	A	22982	DIP2C	-	CDS			exonic	DIP2C	.	nonsynonymous SNV	DIP2C:NM_014974:exon30:c.C3617T:p.P1206L	D	P	P	D	D	M	T	D	T	T	T	D	25.9	1.048	0.915	Iossifov;Satterstrom2020	13277.s1	;13277		;35947	;35949	;Female	NA	NA	NA
450	152407||10_38241487_G_A	exome	NDD	autism	10_38241487_G_A	10	38241487	G	A	219749	ZNF25	-	CDS			exonic	ZNF25	.	synonymous SNV	ZNF25:NM_001329650:exon6:c.C939T:p.P313P,ZNF25:NM_001329652:exon6:c.C939T:p.P313P,ZNF25:NM_001329654:exon6:c.C939T:p.P313P,ZNF25:NM_001329655:exon6:c.C936T:p.P312P,ZNF25:NM_145011:exon6:c.C939T:p.P313P,ZNF25:NM_001329647:exon7:c.C951T:p.P317P,ZNF25:NM_001329649:exon7:c.C951T:p.P317P,ZNF25:NM_001329651:exon7:c.C939T:p.P313P,ZNF25:NM_001329653:exon7:c.C939T:p.P313P,ZNF25:NM_001329657:exon7:c.C831T:…	.	.	.	.	.	.	.	.	.	.	.	.	.	.	.	Satterstrom2020	152407	152407		152409	152408	Female	NA	NA	NA
451	13505.p1||10_38343419_G_A	exome	NDD	autism	10_38343419_G_A	10	38343419	G	A	7581	ZNF33A	+	CDS			exonic	ZNF33A	.	nonsynonymous SNV	ZNF33A:NM_001278170:exon4:c.G385A:p.G129R,ZNF33A:NM_001324178:exon4:c.G388A:p.G130R,ZNF33A:NM_001278177:exon5:c.G430A:p.G144R,ZNF33A:NM_001278178:exon5:c.G31A:p.G11R,ZNF33A:NM_001324176:exon5:c.G31A:p.G11R,ZNF33A:NM_006954:exon5:c.G367A:p.G123R,ZNF33A:NM_006974:exon5:c.G364A:p.G122R,ZNF33A:NM_001278171:exon6:c.G31A:p.G11R,ZNF33A:NM_001278173:exon6:c.G421A:p.G141R,ZNF33A:NM_001278174:exon6:c.G31A:…	T	B	B	N	N	L	T	D	T	T	T	N	6.324	0.502	0.443	Werling_WGS_call	13505.p1	13505		SSC07941	SSC07937	Male	NA	NA	NA
452	25173.p1||10_38407139_C_A	exome	NDD	tourette_syndrome	10_38407139_C_A	10	38407139	C	A	7587	ZNF37A	+	CDS			exonic	ZNF37A	.	nonsynonymous SNV	ZNF37A:NM_001178101:exon7:c.C1060A:p.P354T,ZNF37A:NM_001324245:exon7:c.C1060A:p.P354T,ZNF37A:NM_001324248:exon7:c.C1060A:p.P354T,ZNF37A:NM_001324249:exon7:c.C1060A:p.P354T,ZNF37A:NM_003421:exon7:c.C1060A:p.P354T,ZNF37A:NM_001007094:exon8:c.C1060A:p.P354T,ZNF37A:NM_001324246:exon8:c.C1060A:p.P354T,ZNF37A:NM_001324247:exon8:c.C1060A:p.P354T,ZNF37A:NM_001324250:exon8:c.C1060A:p.P354T,ZNF37A:NM_00132…	D	D	D	.	D	M	T	D	T	T	T	N	27.8	0.739	0.979	Willsey2017	25173.p1						NA	NA	NA
453	3107-1||10_387255_G_A	exome	NDD	schizophrenia	10_387255_G_A	10	387255	G	A	22982	DIP2C	-	CDS			exonic	DIP2C	.	synonymous SNV	DIP2C:NM_014974:exon29:c.C3468T:p.A1156A	.	.	.	.	.	.	.	.	.	.	.	.	.	.	.	Fromer2014	3107-1						NA	NA	NA
454	DDDP119333||10_403824_C_T	exome	NDD	DD	10_403824_C_T	10	403824	C	T	22982	DIP2C	-	CDS			exonic	DIP2C	.	nonsynonymous SNV	DIP2C:NM_014974:exon23:c.G2848A:p.A950T	D	D	P	D	D	M	T	D	T	T	T	D	26.9	0.935	0.019	Heyne_2018	DDDP119333		simplex			female	NA	NA	NA
455	aht||10_43292963_A_G	exome	NDD	EE	10_43292963_A_G	10	43292963	A	G	9790	BMS1	+	CDS			exonic	BMS1	.	nonsynonymous SNV	BMS1:NM_014753:exon11:c.A2081G:p.Y694C	D	D	D	D	D	L	T	D	T	T	D	D	29.2	1.086	0.998	Heyne_2018	aht		simplex			male	NA	NA	NA
456	612-04-102229||10_43297673_A_G	exome	NDD	autism	10_43297673_A_G	10	43297673	A	G	9790	BMS1	+	intron			intronic	BMS1	.	.	.	.	.	.	.	.	.	.	.	.	.	.	.	.	.	.	Satterstrom2020	612-04-102229	612-04-102229		614-04-102236	613-04-102233	Male	NA	NA	NA
457	13995.p1||10_43297692_G_A	exome	NDD	autism	10_43297692_G_A	10	43297692	G	A	9790	BMS1	+	intron			intronic	BMS1	.	.	.	.	.	.	.	.	.	.	.	.	.	.	.	.	.	.	Iossifov;Satterstrom2020	13995.p1	;13995		;SSC09609	;SSC09596	;Male	NA	NA	NA
458	14480.p1||10_43598098_G_T	exome	NDD	autism	10_43598098_G_T	10	43598098	G	T	5979	RET	+	intron			intronic	RET	.	.	.	.	.	.	.	.	.	.	.	.	.	.	.	.	.	.	Krumm	14480.p1						NA	NA	NA
459	dz||10_43607635_A_G	exome	NDD	EE	10_43607635_A_G	10	43607635	A	G	5979	RET	+	CDS			exonic	RET	.	synonymous SNV	RET:NM_020630:exon8:c.A1611G:p.P537P,RET:NM_020975:exon8:c.A1611G:p.P537P	.	.	.	.	.	.	.	.	.	.	.	.	.	.	.	Heyne_2018	dz		simplex			female	NA	NA	NA
460	006-07-107598||10_43608258_G_A	exome	NDD	autism	10_43608258_G_A	10	43608258	G	A	5979	RET	+	intron			intronic	RET	.	.	.	.	.	.	.	.	.	.	.	.	.	.	.	.	.	.	Satterstrom2020	006-07-107598	006-07-107598		008-07-107600	007-07-107599	Male	NA	NA	NA
461	09C97707A||10_43612227_G_A	exome	NDD	autism	10_43612227_G_A	10	43612227	G	A	5979	RET	+	intron			intronic	RET	.	.	.	.	.	.	.	.	.	.	.	.	.	.	.	.	.	.	Satterstrom2020	09C97707A	09C97707A		09C97708A	09C97710A	Female	NA	NA	NA
462	12656.p1||10_43617507_C_T	exome	NDD	autism	10_43617507_C_T	10	43617507	C	T	5979	RET	+	intron			intronic	RET	.	.	.	.	.	.	.	.	.	.	.	.	.	.	.	.	.	.	Satterstrom2020	12656.p1	12656		SSC05658	SSC05638	Male	NA	NA	NA
463	14055.s1||10_43694332_G_A	exome	control	control	10_43694332_G_A	10	43694332	G	A	221002	RASGEF1A	-	intron			intronic	RASGEF1A	.	.	.	.	.	.	.	.	.	.	.	.	.	.	.	.	.	.	Satterstrom2020	14055.s1	14055		14055.fa	14055.mo	Male	NA	NA	NA
464	NP152||10_43882148_C_T	exome	NDD	autism	10_43882148_C_T	10	43882148	C	T	3185	HNRNPF	-	CDS			exonic	HNRNPF	.	synonymous SNV	HNRNPF:NM_001098208:exon3:c.G1185A:p.Q395Q,HNRNPF:NM_001098204:exon4:c.G1185A:p.Q395Q,HNRNPF:NM_001098205:exon4:c.G1185A:p.Q395Q,HNRNPF:NM_001098206:exon4:c.G1185A:p.Q395Q,HNRNPF:NM_001098207:exon4:c.G1185A:p.Q395Q,HNRNPF:NM_004966:exon4:c.G1185A:p.Q395Q	.	.	.	.	.	.	.	.	.	.	.	.	.	.	.	Satterstrom2020	NP152	NP152		NF237	NF238	Male	NA	NA	NA
465	11043.p1||10_43883191_T_C	exome	NDD	autism	10_43883191_T_C	10	43883191	T	C	3185	HNRNPF	-	CDS			exonic	HNRNPF	.	nonsynonymous SNV	HNRNPF:NM_001098208:exon3:c.A142G:p.T48A,HNRNPF:NM_001098204:exon4:c.A142G:p.T48A,HNRNPF:NM_001098205:exon4:c.A142G:p.T48A,HNRNPF:NM_001098206:exon4:c.A142G:p.T48A,HNRNPF:NM_001098207:exon4:c.A142G:p.T48A,HNRNPF:NM_004966:exon4:c.A142G:p.T48A	T	B	B	D	D	L	T	N	T	T	T	D	12.46	0.993	0.988	Satterstrom2020	11043.p1	11043		5247	5279	Female	NA	NA	NA
466	DDDP115470||10_43883288_G_A	exome	NDD	DD	10_43883288_G_A	10	43883288	G	A	3185	HNRNPF	-	CDS			exonic	HNRNPF	.	synonymous SNV	HNRNPF:NM_001098208:exon3:c.C45T:p.L15L,HNRNPF:NM_001098204:exon4:c.C45T:p.L15L,HNRNPF:NM_001098205:exon4:c.C45T:p.L15L,HNRNPF:NM_001098206:exon4:c.C45T:p.L15L,HNRNPF:NM_001098207:exon4:c.C45T:p.L15L,HNRNPF:NM_004966:exon4:c.C45T:p.L15L	.	.	.	.	.	.	.	.	.	.	.	.	.	.	.	Heyne_2018	DDDP115470		simplex			female	NA	NA	NA
467	09C85887||10_44112244_C_T	exome	NDD	autism	10_44112244_C_T	10	44112244	C	T	220992	ZNF485	+	CDS			exonic	ZNF485	.	synonymous SNV	ZNF485:NM_001318143:exon3:c.C480T:p.F160F,ZNF485:NM_001318142:exon4:c.C480T:p.F160F,ZNF485:NM_001318140:exon5:c.C753T:p.F251F,ZNF485:NM_001318141:exon5:c.C753T:p.F251F,ZNF485:NM_145312:exon5:c.C753T:p.F251F	.	.	.	.	.	.	.	.	.	.	.	.	.	.	.	DeRubeis2014;Satterstrom2020	09C85887	;09C85887		;09C85889	;09C85888	;Male	NA	NA	NA
468	EGAN00001101385||10_445023_A_T	exome	NDD	autism	10_445023_A_T	10	445023	A	T	22982	DIP2C	-	intron			intronic	DIP2C	.	.	.	.	.	.	.	.	.	.	.	.	.	.	.	.	.	.	Satterstrom2020	EGAN00001101385	EGAN00001101385		EGAN00001101155	EGAN00001101384	Male	NA	NA	NA
469	DDDP111428||10_45488731_G_A	exome	NDD	DD	10_45488731_G_A	10	45488731	G	A	83937	RASSF4	+	CDS			exonic	RASSF4	.	nonsynonymous SNV	RASSF4:NM_032023:exon11:c.G920A:p.R307H	D	D	D	D	D	L	T	D	T	T	D	D	35	0.953	1	Heyne_2018	DDDP111428		simplex			male	NA	NA	NA
470	3B332||10_45498839_C_T	exome	NDD	autism	10_45498839_C_T	10	45498839	C	T	7570	ZNF22	+	CDS			exonic	ZNF22	.	nonsynonymous SNV	ZNF22:NM_006963:exon2:c.C23T:p.A8V	T	B	B	N	N	N	T	N	T	T	T	N	16.98	0.09	0.94	Satterstrom2020	3B332	3B332		4F729	4F730	Female	NA	NA	NA
471	DDDP114203||10_45939271_G_A	exome	NDD	DD	10_45939271_G_A	10	45939271	G	A	240	ALOX5	+	CDS			exonic	ALOX5	.	nonsynonymous SNV	ALOX5:NM_000698:exon12:c.G1669A:p.G557S,ALOX5:NM_001256153:exon12:c.G1573A:p.G525S,ALOX5:NM_001256154:exon12:c.G1669A:p.G557S,ALOX5:NM_001320861:exon12:c.G1582A:p.G528S,ALOX5:NM_001320862:exon12:c.G1234A:p.G412S	T	D	D	D	D	.	D	D	D	D	D	D	34	1.04	0.998	Heyne_2018	DDDP114203		simplex			female	NA	NA	NA
472	86708589||10_46321378_G_A	exome	NDD	tourette_syndrome	10_46321378_G_A	10	46321378	G	A	119016	AGAP4	-	CDS			exonic	AGAP4	.	synonymous SNV	AGAP4:NM_133446:exon7:c.C1977T:p.P659P,AGAP4:NM_001276343:exon8:c.C2046T:p.P682P,AGAP4:NM_001291379:exon10:c.C1722T:p.P574P	.	.	.	.	.	.	.	.	.	.	.	.	.	.	.	Willsey2017	86708589						NA	NA	NA
473	13115.s1||10_47087536_C_A	exome	control	control	10_47087536_C_A	10	47087536	C	A	653145	ANXA8	-	intron			exonic	NPY4R;NPY4R2	.	synonymous SNV	NPY4R2:NM_001278795:exon1:c.C753A:p.G251G,NPY4R:NM_001278794:exon2:c.C753A:p.G251G,NPY4R:NM_005972:exon3:c.C753A:p.G251G	.	.	.	.	.	.	.	.	.	.	.	.	.	.	.	Iossifov;SSC_Iossifov_2014	13115.s1	;13115		;13115.fa	;13115.mo	;Male	NA	NA	NA
474	12||10_48390369_C_G	exome	NDD	schizophrenia	10_48390369_C_G	10	48390369	C	G	5949	RBP3	-	CDS			exonic	RBP3	.	nonsynonymous SNV	RBP3:NM_002900:exon1:c.G509C:p.R170P	.	.	.	.	.	.	.	.	.	.	.	.	.	.	.	McCarthy2014	12						NA	NA	NA
475	14520.p1||10_49365422_A_G	exome	NDD	autism	10_49365422_A_G	10	49365422	A	G	143162	FRMPD2	-	intron			intronic	FRMPD2	.	.	.	.	.	.	.	.	.	.	.	.	.	.	.	.	.	.	Krumm	14520.p1						NA	NA	NA
476	08C75780||10_49400771_G_A	exome	NDD	autism	10_49400771_G_A	10	49400771	G	A	143162	FRMPD2	-	CDS			exonic	FRMPD2	.	synonymous SNV	FRMPD2:NM_001318191:exon14:c.C2046T:p.N682N,FRMPD2:NM_001018071:exon16:c.C2121T:p.N707N	.	.	.	.	.	.	.	.	.	.	.	.	.	.	.	Satterstrom2020	08C75780	08C75780		08C75778	08C75779	Male	NA	NA	NA
477	AC05-0002-01||10_49450437_G_C	exome	NDD	autism	10_49450437_G_C	10	49450437	G	C	143162	FRMPD2	-	intron			intronic	FRMPD2	.	.	.	.	.	.	.	.	.	.	.	.	.	.	.	.	.	.	De_Rubeis_2014	AC05-0002-01	AC05-0002-01		AC05-0002-02	AC05-0002-03	Male	NA	NA	NA
478	DDDP113727||10_49457208_A_G	exome	NDD	DD	10_49457208_A_G	10	49457208	A	G	143162	FRMPD2	-	CDS			exonic	FRMPD2	.	synonymous SNV	FRMPD2:NM_001318191:exon2:c.T159C:p.Y53Y,FRMPD2:NM_001018071:exon3:c.T165C:p.Y55Y	.	.	.	.	.	.	.	.	.	.	.	.	.	.	.	Heyne_2018	DDDP113727		simplex			female	NA	NA	NA
479	3107-1||10_49628258_G_A	exome	NDD	schizophrenia	10_49628258_G_A	10	49628258	G	A	5599	MAPK8	+	CDS			exonic	MAPK8	.	nonsynonymous SNV	MAPK8:NM_001278548:exon5:c.G511A:p.G171S,MAPK8:NM_001278547:exon6:c.G511A:p.G171S,MAPK8:NM_001323320:exon6:c.G511A:p.G171S,MAPK8:NM_001323321:exon6:c.G511A:p.G171S,MAPK8:NM_001323324:exon6:c.G511A:p.G171S,MAPK8:NM_001323329:exon6:c.G511A:p.G171S,MAPK8:NM_001323323:exon7:c.G511A:p.G171S,MAPK8:NM_001323325:exon7:c.G511A:p.G171S,MAPK8:NM_001323326:exon7:c.G511A:p.G171S,MAPK8:NM_001323327:exon7:c.G51…	D	D	D	D	D	M	D	D	D	D	D	D	34	1.048	0.994	Fromer2014	3107-1						NA	NA	NA
480	13726.s1||10_49634446_T_C	exome	control	control	10_49634446_T_C	10	49634446	T	C	5599	MAPK8	+	CDS			exonic	MAPK8	.	nonsynonymous SNV	MAPK8:NM_001278548:exon7:c.T667C:p.S223P,MAPK8:NM_001323320:exon8:c.T667C:p.S223P,MAPK8:NM_001278547:exon9:c.T895C:p.S299P,MAPK8:NM_001323321:exon9:c.T895C:p.S299P,MAPK8:NM_001323324:exon9:c.T895C:p.S299P,MAPK8:NM_001323329:exon9:c.T895C:p.S299P,MAPK8:NM_001323323:exon10:c.T895C:p.S299P,MAPK8:NM_001323325:exon10:c.T895C:p.S299P,MAPK8:NM_001323326:exon10:c.T895C:p.S299P,MAPK8:NM_001323327:exon10:c…	D	D	D	D	D	L	T	D	D	D	D	D	31	1.061	1	Iossifov;Satterstrom2020	13726.s1	;13726		;4952	;4984	;Male	NA	NA	NA
481	13726.s1||10_49634452_A_T	exome	control	control	10_49634452_A_T	10	49634452	A	T	5599	MAPK8	+	CDS			exonic	MAPK8	.	nonsynonymous SNV	MAPK8:NM_001278548:exon7:c.A673T:p.M225L,MAPK8:NM_001323320:exon8:c.A673T:p.M225L,MAPK8:NM_001278547:exon9:c.A901T:p.M301L,MAPK8:NM_001323321:exon9:c.A901T:p.M301L,MAPK8:NM_001323324:exon9:c.A901T:p.M301L,MAPK8:NM_001323329:exon9:c.A901T:p.M301L,MAPK8:NM_001323323:exon10:c.A901T:p.M301L,MAPK8:NM_001323325:exon10:c.A901T:p.M301L,MAPK8:NM_001323326:exon10:c.A901T:p.M301L,MAPK8:NM_001323327:exon10:c…	D	B	B	D	D	N	D	D	D	T	D	D	25.2	1.199	1	Iossifov	13726.s1						NA	NA	NA
482	060-03-100251||10_49658540_G_A	exome	NDD	autism	10_49658540_G_A	10	49658540	G	A	58504	ARHGAP22	-	CDS			exonic	ARHGAP22	.	synonymous SNV	ARHGAP22:NM_001256026:exon7:c.C1362T:p.H454H,ARHGAP22:NM_001347735:exon8:c.C1503T:p.H501H,ARHGAP22:NM_001256024:exon9:c.C1680T:p.H560H,ARHGAP22:NM_001256025:exon9:c.C1650T:p.H550H,ARHGAP22:NM_021226:exon9:c.C1632T:p.H544H,ARHGAP22:NM_001347738:exon10:c.C1650T:p.H550H	.	.	.	.	.	.	.	.	.	.	.	.	.	.	.	Satterstrom2020	060-03-100251	060-03-100251		093-03-100100	092-03-100099	Male	NA	NA	NA
483	14060.p1||10_49659238_C_A	exome	NDD	autism	10_49659238_C_A	10	49659238	C	A	58504	ARHGAP22	-	CDS			intronic	ARHGAP22	.	.	.	.	.	.	.	A	.	.	.	.	.	.	N	4.06	-0.749	0	Satterstrom2020	14060.p1	14060		SSC09901	SSC09898	Male	NA	NA	NA
484	11002.s1||10_49917965_T_C	exome	control	control	10_49917965_T_C	10	49917965	T	C	57705	WDFY4	+	CDS			exonic	WDFY4	.	nonsynonymous SNV	WDFY4:NM_020945:exon2:c.T188C:p.I63T	T	B	B	.	N	N	T	N	T	T	T	N	0.001	-2.594	0.001	Satterstrom2020	11002.s1	11002		SSC03092	SSC03078	Male	NA	NA	NA
485	58290790||10_49937534_G_C	exome	NDD	tourette_syndrome	10_49937534_G_C	10	49937534	G	C	57705	WDFY4	+	CDS			exonic	WDFY4	.	synonymous SNV	WDFY4:NM_020945:exon8:c.G1029C:p.L343L	.	.	.	.	.	.	.	.	.	.	.	.	.	.	.	Willsey2017	58290790						NA	NA	NA
486	12673.p1||10_49939237_A_G	exome	NDD	autism	10_49939237_A_G	10	49939237	A	G	57705	WDFY4	+	CDS			exonic	WDFY4	.	synonymous SNV	WDFY4:NM_020945:exon9:c.A1212G:p.Q404Q	.	.	.	.	.	.	.	.	.	.	.	.	.	.	.	Krumm	12673.p1						NA	NA	NA
487	12497.p1||10_49982706_G_A	exome	NDD	ASD;autism	10_49982706_G_A	10	49982706	G	A	57705	WDFY4	+	CDS			exonic	WDFY4	.	synonymous SNV	WDFY4:NM_020945:exon14:c.G2757A:p.P919P	.	.	.	.	.	.	.	.	.	.	.	.	.	.	.	Heyne_2018;Satterstrom2020	12497.p1	;12497	simplex;	;SSC06443	;SSC06437	male;Male	NA	NA	NA
488	11359.p1||10_50025336_C_A	exome	NDD	autism	10_50025336_C_A	10	50025336	C	A	57705	WDFY4	+	CDS			exonic	WDFY4	.	nonsynonymous SNV	WDFY4:NM_020945:exon32:c.C5387A:p.A1796D	T	P	B	N	N	M	T	D	T	T	T	N	14.4	-0.414	0.011	Iossifov;Satterstrom2020	11359.p1	;11359		;SSC01042	;SSC01041	;Male	NA	NA	NA
489	11249.p1||10_50075397_A_G	exome	NDD	autism	10_50075397_A_G	10	50075397	A	G	57705	WDFY4	+	intron			intronic	WDFY4	.	.	.	.	.	.	.	.	.	.	.	.	.	.	.	.	.	.	Iossifov;Satterstrom2020	11249.p1	;11249		;11249.fa	;11249.mo	;Male	NA	NA	NA
490	DDDP111469||10_50105596_C_T	exome	NDD	DD	10_50105596_C_T	10	50105596	C	T	57705	WDFY4	+	CDS			exonic	WDFY4	.	nonsynonymous SNV	WDFY4:NM_020945:exon45:c.C7414T:p.R2472W	D	P	B	N	D	M	T	D	T	T	D	D	35	0.852	0.975	Heyne_2018	DDDP111469		simplex			female	NA	NA	NA
491	11178.p1||10_50109868_C_A	exome	NDD	autism	10_50109868_C_A	10	50109868	C	A	57705	WDFY4	+	CDS			exonic	WDFY4	.	nonsynonymous SNV	WDFY4:NM_020945:exon47:c.C7546A:p.L2516M	D	D	D	N	D	M	T	N	T	T	D	N	26.5	-0.166	0.978	Iossifov;Satterstrom2020	11178.p1	;11178		;31704	;31706	;Male	NA	NA	NA
492	09C83971||10_50121522_T_C	exome	NDD	autism	10_50121522_T_C	10	50121522	T	C	474354	LRRC18	-	CDS			exonic	LRRC18	.	nonsynonymous SNV	LRRC18:NM_001006939:exon1:c.A679G:p.M227V	T	B	B	N	N	L	T	N	T	T	T	N	0.002	1.061	0.024	DeRubeis2014;Satterstrom2020	09C83971	;09C83971		;09C83973	;09C83972	;Male	NA	NA	NA
493	NP112||10_50155005_C_T	exome	NDD	autism	10_50155005_C_T	10	50155005	C	T	57705	WDFY4	+	CDS			exonic	WDFY4	.	synonymous SNV	WDFY4:NM_020945:exon51:c.C7968T:p.C2656C	.	.	.	.	.	.	.	.	.	.	.	.	.	.	.	Satterstrom2020	NP112	NP112		NF153	NF154	Male	NA	NA	NA
494	430||10_50316007_G_A	exome	NDD	ID	10_50316007_G_A	10	50316007	G	A	196740	VSTM4	-	CDS			exonic	VSTM4	.	nonsynonymous SNV	VSTM4:NM_001031746:exon2:c.C89T:p.P30L,VSTM4:NM_144984:exon2:c.C89T:p.P30L	D	D	D	D	D	M	T	D	T	T	D	D	33	1.048	0.987	Heyne_2018	430		simplex			male	NA	NA	NA
495	Lelieveld_430||10_50316007_G_A	exome	NDD	ID	10_50316007_G_A	10	50316007	G	A	196740	VSTM4	-	CDS			exonic	VSTM4	.	nonsynonymous SNV	VSTM4:NM_001031746:exon2:c.C89T:p.P30L,VSTM4:NM_144984:exon2:c.C89T:p.P30L	D	D	D	D	D	M	T	D	T	T	D	D	33	1.048	0.987	Lelieveld2016	Lelieveld_430						NA	NA	NA
496	13399.p1||10_5032204_A_G	exome	NDD	autism	10_5032204_A_G	10	5032204	A	G	1646	AKR1C2	-	CDS			exonic	AKR1C2	.	nonsynonymous SNV	AKR1C2:NM_001321027:exon8:c.T878C:p.F293S,AKR1C2:NM_205845:exon10:c.T956C:p.F319S,AKR1C2:NM_001354:exon11:c.T956C:p.F319S	D	B	B	D	N	M	T	D	T	T	T	N	19.37	-1.473	0	Iossifov;SSC_Iossifov_2014	13399.p1	;13399		;13399.fa	;13399.mo	;Male	NA	NA	NA
497	14122.p1||10_5040898_G_A	exome	NDD	autism	10_5040898_G_A	10	5040898	G	A	1646	AKR1C2	-	CDS			exonic	AKR1C2	.	synonymous SNV	AKR1C2:NM_001321027:exon4:c.C411T:p.I137I,AKR1C2:NM_205845:exon6:c.C489T:p.I163I,AKR1C2:NM_001354:exon7:c.C489T:p.I163I	.	.	.	.	.	.	.	.	.	.	.	.	.	.	.	Iossifov;Satterstrom2020	14122.p1	;14122		;SSC11024	;SSC11015	;Male	NA	NA	NA
498	004-05-102519||10_5042572_C_G	exome	NDD	autism	10_5042572_C_G	10	5042572	C	G	1646	AKR1C2	-	3'UTR			UTR3	AKR1C2	NM_001135241:c.*30G>C	.	.	.	.	.	.	.	.	.	.	.	.	.	.	.	.	.	Satterstrom2020	004-05-102519	004-05-102519		710-04-102517	709-04-102514	Female	NA	NA	NA
499	476-09-111962||10_5042698_C_T	exome	NDD	autism	10_5042698_C_T	10	5042698	C	T	1646	AKR1C2	-	intron			intronic	AKR1C2	.	.	.	.	.	.	.	.	.	.	.	.	.	.	.	.	.	.	Satterstrom2020	476-09-111962	476-09-111962		481-09-111964	477-09-111963	Male	NA	NA	NA
500	11214.p1||10_5042775_G_T	exome	NDD	autism	10_5042775_G_T	10	5042775	G	T	1646	AKR1C2	-	CDS			exonic	AKR1C2	.	nonsynonymous SNV	AKR1C2:NM_001135241:exon3:c.C336A:p.D112E,AKR1C2:NM_001321027:exon3:c.C336A:p.D112E,AKR1C2:NM_205845:exon4:c.C336A:p.D112E,AKR1C2:NM_001354:exon5:c.C336A:p.D112E	D	D	D	D	N	M	T	D	D	D	T	N	22.5	-0.15	0.034	Satterstrom2020	11214.p1	11214		SSC02807	SSC02803	Male	NA	NA	NA
501	13619.s1||10_5042877_C_G	exome	control	control	10_5042877_C_G	10	5042877	C	G	1646	AKR1C2	-	intron			intronic	AKR1C2	.	.	.	.	.	.	.	.	.	.	.	.	.	.	.	.	.	.	Iossifov	13619.s1						NA	NA	NA
502	11167.p1||10_50534797_G_A	exome	NDD	autism	10_50534797_G_A	10	50534797	G	A	118461	C10orf71	+	CDS			exonic	C10orf71	.	nonsynonymous SNV	C10orf71:NM_001135196:exon3:c.G4207A:p.G1403S	T	.	.	U	N	L	T	N	T	T	D	N	6.718	-0.469	0	Krumm;Satterstrom2020	11167.p1	;11167		;11167.fa	;11167.mo	;Male	NA	NA	NA
503	09C92830||10_50682320_A_G	exome	control	control	10_50682320_A_G	10	50682320	A	G	2074	ERCC6	-	intron			intronic	ERCC6	.	.	.	.	.	.	.	.	.	.	.	.	.	.	.	.	.	.	Satterstrom2020	09C92830	09C92830		09C92829	09C92707	Male	NA	NA	NA
504	09C83971||10_50691429_C_T	exome	NDD	autism	10_50691429_C_T	10	50691429	C	T	2074	ERCC6	-	CDS			exonic	ERCC6	.	nonsynonymous SNV	ERCC6:NM_000124:exon9:c.G1955A:p.R652Q,ERCC6:NM_001346440:exon9:c.G1955A:p.R652Q	D	D	D	.	D	M	D	D	D	D	D	D	35	0.935	1	DeRubeis2014;Satterstrom2020	09C83971	;09C83971		;09C83973	;09C83972	;Male	NA	NA	NA
505	14212.s1||10_50835752_C_T	exome	control	control	10_50835752_C_T	10	50835752	C	T	1103	CHAT	+	CDS			exonic	CHAT	.	synonymous SNV	CHAT:NM_001142929:exon7:c.C678T:p.D226D,CHAT:NM_020549:exon7:c.C1032T:p.D344D,CHAT:NM_020984:exon7:c.C678T:p.D226D,CHAT:NM_020986:exon7:c.C678T:p.D226D,CHAT:NM_001142933:exon8:c.C786T:p.D262D,CHAT:NM_001142934:exon8:c.C678T:p.D226D,CHAT:NM_020985:exon8:c.C678T:p.D226D	.	.	.	.	.	.	.	.	.	.	.	.	.	.	.	Iossifov;Satterstrom2020	14212.s1	;14212		;SSC11226	;SSC11223	;Female	NA	NA	NA
506	331-08-110350||10_50854705_C_T	exome	control	control	10_50854705_C_T	10	50854705	C	T	1103	CHAT	+	CDS			exonic	CHAT	.	synonymous SNV	CHAT:NM_001142929:exon8:c.C912T:p.Y304Y,CHAT:NM_020549:exon8:c.C1266T:p.Y422Y,CHAT:NM_020984:exon8:c.C912T:p.Y304Y,CHAT:NM_020986:exon8:c.C912T:p.Y304Y,CHAT:NM_001142933:exon9:c.C1020T:p.Y340Y,CHAT:NM_001142934:exon9:c.C912T:p.Y304Y,CHAT:NM_020985:exon9:c.C912T:p.Y304Y	.	.	.	.	.	.	.	.	.	.	.	.	.	.	.	Satterstrom2020	331-08-110350	331-08-110350		328-08-110347	332-08-110352	Male	NA	NA	NA
507	12688.p1||10_50856665_T_G	exome	NDD	autism	10_50856665_T_G	10	50856665	T	G	1103	CHAT	+	intron			intronic	CHAT	.	.	.	.	.	.	.	.	.	.	.	.	.	.	.	.	.	.	Krumm;Satterstrom2020	12688.p1	;12688		;SSC05387	;SSC05377	;Male	NA	NA	NA
508	11108.p1||10_50887799_T_C	exome	NDD	autism	10_50887799_T_C	10	50887799	T	C	282966	C10orf53	+	CDS			exonic	C10orf53	.	nonsynonymous SNV	C10orf53:NM_001042427:exon1:c.T56C:p.L19P,C10orf53:NM_182554:exon1:c.T56C:p.L19P	D	D	D	N	D	.	.	D	T	T	D	D	24.6	1.011	0.01	Krumm;Satterstrom2020	11108.p1	;11108		;SSC00822	;SSC00821	;Male	NA	NA	NA
509	12964.s1||10_50916480_G_A	exome	control	control	10_50916480_G_A	10	50916480	G	A	282966	C10orf53	+	CDS	LTR	1	exonic	C10orf53	.	synonymous SNV	C10orf53:NM_182554:exon3:c.G291A:p.P97P	.	.	.	.	.	.	.	.	.	.	.	.	.	.	.	Iossifov;Satterstrom2020	12964.s1	;12964		;SSC06252	;SSC06247	;Male	NA	NA	NA
510	25033.p1||10_50943275_T_C	exome	NDD	tourette_syndrome	10_50943275_T_C	10	50943275	T	C	55753	OGDHL	-	CDS			exonic	OGDHL	.	stoploss	OGDHL:NM_001143997:exon21:c.A2405G:p.X802W,OGDHL:NM_001347822:exon21:c.A2405G:p.X802W,OGDHL:NM_001347826:exon21:c.A1835G:p.X612W,OGDHL:NM_001143996:exon22:c.A2861G:p.X954W,OGDHL:NM_001347820:exon22:c.A2861G:p.X954W,OGDHL:NM_001347823:exon22:c.A2852G:p.X951W,OGDHL:NM_001347824:exon22:c.A2852G:p.X951W,OGDHL:NM_001347825:exon22:c.A2225G:p.X742W,OGDHL:NM_001347819:exon23:c.A3032G:p.X1011W,OGDHL:NM_00…	.	.	.	.	N	.	.	.	.	.	.	N	18.16	0.964	0.968	Willsey2017	25033.p1						NA	NA	NA
511	DDDP119924||10_51579259_C_A	exome	NDD	DD	10_51579259_C_A	10	51579259	C	A	8505	PARG	-	intron			exonic	NCOA4	.	nonsynonymous SNV	NCOA4:NM_001145262:exon2:c.C118A:p.Q40K,NCOA4:NM_001145263:exon2:c.C118A:p.Q40K,NCOA4:NM_005437:exon2:c.C118A:p.Q40K,NCOA4:NM_001145260:exon3:c.C166A:p.Q56K,NCOA4:NM_001145261:exon3:c.C166A:p.Q56K	.	.	.	.	.	.	.	.	.	.	T	.	.	1.048	1	Heyne_2018	DDDP119924		simplex			male	NA	NA	NA
512	93421087||10_51585524_G_A	exome	NDD	tourette_syndrome	10_51585524_G_A	10	51585524	G	A	8031	NCOA4	+	CDS			exonic	NCOA4	.	synonymous SNV	NCOA4:NM_001145262:exon8:c.G1623A:p.L541L,NCOA4:NM_001145263:exon8:c.G1623A:p.L541L,NCOA4:NM_005437:exon8:c.G1623A:p.L541L,NCOA4:NM_001145260:exon9:c.G1671A:p.L557L,NCOA4:NM_001145261:exon9:c.G1671A:p.L557L	.	.	.	.	.	.	.	.	.	.	.	.	.	.	.	Willsey2017	93421087						NA	NA	NA
513	e||10_5242207_G_T	exome	NDD	EE	10_5242207_G_T	10	5242207	G	T	1109	AKR1C4	+	CDS			exonic	AKR1C4	.	nonsynonymous SNV	AKR1C4:NM_001818:exon2:c.G148T:p.D50Y	D	D	D	D	D	H	T	D	D	D	T	D	25.7	0.998	0.013	Heyne_2018	e		simplex			male	NA	NA	NA
514	14189.s1||10_53458405_C_T	exome	control	control	10_53458405_C_T	10	53458405	C	T	23283	CSTF2T	-	CDS			exonic	CSTF2T	.	nonsynonymous SNV	CSTF2T:NM_015235:exon1:c.G905A:p.R302Q	T	D	D	N	D	L	T	N	T	T	T	D	25.3	0.935	0.795	Satterstrom2020	14189.s1	14189		SSC10562	SSC12709	Male	NA	NA	NA
515	DDDP104274||10_53667268_G_A	exome	NDD	DD	10_53667268_G_A	10	53667268	G	A	5592	PRKG1	+	CDS			exonic	PRKG1	.	nonsynonymous SNV	PRKG1:NM_001098512:exon5:c.G655A:p.V219I,PRKG1:NM_006258:exon5:c.G700A:p.V234I	D	D	P	D	D	M	T	N	T	T	D	D	26.3	0.994	0.664	Heyne_2018	DDDP104274		simplex			female	NA	NA	NA
516	DDDP100325||10_53814250_T_A	exome	NDD	DD	10_53814250_T_A	10	53814250	T	A	5592	PRKG1	+	CDS||5'UTR			exonic	PRKG1	.	nonsynonymous SNV	PRKG1:NM_001098512:exon6:c.T724A:p.Y242N,PRKG1:NM_006258:exon6:c.T769A:p.Y257N	D	D	D	D	D	H	D	D	D	D	D	D	33	1.061	1	Heyne_2018	DDDP100325		simplex			male	NA	NA	NA
517	DDDP119283||10_54011406_G_A	exome	NDD	DD	10_54011406_G_A	10	54011406	G	A	5592	PRKG1	+	CDS			exonic	PRKG1	.	nonsynonymous SNV	PRKG1:NM_001098512:exon10:c.G1108A:p.G370S,PRKG1:NM_006258:exon10:c.G1153A:p.G385S	D	D	P	D	D	N	T	D	T	T	D	D	29.3	1.033	1	Heyne_2018	DDDP119283		simplex			male	NA	NA	NA
518	ASDFI_1508||10_54074405_G_A	exome	NDD	autism	10_54074405_G_A	10	54074405	G	A	22943	DKK1	+	CDS			exonic	DKK1	.	nonsynonymous SNV	DKK1:NM_012242:exon1:c.G211A:p.G71R	D	P	B	N	N	N	T	N	T	T	T	N	24.8	0.857	0.832	DeRubeis2014;Satterstrom2020	ASDFI_1508	;ASDFI_1508		;ASDFI_1509	;ASDFI_1505	;Female	NA	NA	NA
519	AU145A||10_54074461_G_A	exome	NDD	autism	10_54074461_G_A	10	54074461	G	A	22943	DKK1	+	intron			intronic	DKK1	.	.	.	.	.	.	.	.	.	.	.	.	.	.	.	.	.	.	Satterstrom2020	AU145A	AU145A		AU145B	AU145C	Male	NA	NA	NA
520	08C75655||10_5435888_C_T	exome	NDD	autism	10_5435888_C_T	10	5435888	C	T	79861	TUBAL3	-	CDS			exonic	TUBAL3	.	synonymous SNV	TUBAL3:NM_001171864:exon4:c.G813A:p.K271K,TUBAL3:NM_024803:exon4:c.G933A:p.K311K	.	.	.	.	.	.	.	.	.	.	.	.	.	.	.	Satterstrom2020	08C75655	08C75655		08C75656	08C75475	Female	NA	NA	NA
521	12720.p1||10_5437356_G_A	exome	NDD	autism;ASD	10_5437356_G_A	10	5437356	G	A	79861	TUBAL3	-	CDS			exonic	TUBAL3	.	synonymous SNV	TUBAL3:NM_001171864:exon3:c.C210T:p.Y70Y,TUBAL3:NM_024803:exon3:c.C330T:p.Y110Y	.	.	.	.	.	.	.	.	.	.	.	.	.	.	.	Iossifov;Heyne_2018;Satterstrom2020	12720.p1	;12720	;simplex	;SSC05791	;SSC05788	;male;Male	NA	NA	NA
522	08C74292||10_5498175_G_A	exome	NDD	autism	10_5498175_G_A	10	5498175	G	A	10276	NET1	+	CDS			exonic	NET1	.	synonymous SNV	NET1:NM_005863:exon9:c.G1161A:p.L387L,NET1:NM_001047160:exon11:c.G1323A:p.L441L	.	.	.	.	.	.	.	.	.	.	.	.	.	.	.	Satterstrom2020	08C74292	08C74292		08C74290	08C74293	Male	NA	NA	NA
523	14423.p1||10_55581663_G_A	exome	NDD	ASD;autism	10_55581663_G_A	10	55581663	G	A	65217	PCDH15	-	CDS			exonic	PCDH15	.	synonymous SNV	PCDH15:NM_001142767:exon31:c.C5703T:p.V1901V,PCDH15:NM_001142765:exon32:c.C5616T:p.V1872V,PCDH15:NM_001142766:exon32:c.C5814T:p.V1938V,PCDH15:NM_001142773:exon32:c.C5754T:p.V1918V,PCDH15:NM_001142768:exon33:c.C5763T:p.V1921V,PCDH15:NM_033056:exon33:c.C5823T:p.V1941V,PCDH15:NM_001142764:exon34:c.C5829T:p.V1943V,PCDH15:NM_001142763:exon35:c.C5844T:p.V1948V	.	.	.	.	.	.	.	.	.	.	.	.	.	.	.	Heyne_2018;Satterstrom2020	14423.p1	;14423	simplex;	;36171	;36173	male;Male	NA	NA	NA
524	701|Lelieveld_701||10_55581969_C_T	exome	NDD	ID;ID	10_55581969_C_T	10	55581969	C	T	65217	PCDH15	-	CDS			exonic	PCDH15	.	synonymous SNV	PCDH15:NM_001142767:exon31:c.G5397A:p.E1799E,PCDH15:NM_001142765:exon32:c.G5310A:p.E1770E,PCDH15:NM_001142766:exon32:c.G5508A:p.E1836E,PCDH15:NM_001142773:exon32:c.G5448A:p.E1816E,PCDH15:NM_001142768:exon33:c.G5457A:p.E1819E,PCDH15:NM_033056:exon33:c.G5517A:p.E1839E,PCDH15:NM_001142764:exon34:c.G5523A:p.E1841E,PCDH15:NM_001142763:exon35:c.G5538A:p.E1846E	.	.	.	.	.	.	.	.	.	.	.	.	.	.	.	Heyne_2018;Lelieveld2016	701|Lelieveld_701		simplex;			female;	NA	NA	NA
525	08C73987||10_55583160_G_C	exome	NDD	autism	10_55583160_G_C	10	55583160	G	C	65217	PCDH15	-	intron			intronic	PCDH15	.	.	.	.	.	.	.	.	.	.	.	.	.	.	.	.	.	.	Satterstrom2020	08C73987	08C73987		08C73988	08C74151	Male	NA	NA	NA
526	08C76931||10_55617018_G_A	exome	NDD	autism	10_55617018_G_A	10	55617018	G	A	65217	PCDH15	-	CDS			exonic	PCDH15	.	synonymous SNV	PCDH15:NM_001142765:exon26:c.C3510T:p.S1170S,PCDH15:NM_001142767:exon27:c.C3612T:p.S1204S,PCDH15:NM_001142768:exon27:c.C3657T:p.S1219S,PCDH15:NM_001142773:exon27:c.C3657T:p.S1219S,PCDH15:NM_001142764:exon28:c.C3723T:p.S1241S,PCDH15:NM_001142766:exon28:c.C3723T:p.S1241S,PCDH15:NM_033056:exon28:c.C3723T:p.S1241S,PCDH15:NM_001142763:exon29:c.C3738T:p.S1246S	.	.	.	.	.	.	.	.	.	.	.	.	.	.	.	Satterstrom2020	08C76931	08C76931		08C76932	08C76933	Male	NA	NA	NA
527	92||10_55626595_T_C	exome	NDD	ID	10_55626595_T_C	10	55626595	T	C	65217	PCDH15	-	CDS			exonic	PCDH15	.	nonsynonymous SNV	PCDH15:NM_001142765:exon25:c.A3311G:p.N1104S,PCDH15:NM_001142767:exon26:c.A3413G:p.N1138S,PCDH15:NM_001142768:exon26:c.A3458G:p.N1153S,PCDH15:NM_001142773:exon26:c.A3458G:p.N1153S,PCDH15:NM_001142764:exon27:c.A3524G:p.N1175S,PCDH15:NM_001142766:exon27:c.A3524G:p.N1175S,PCDH15:NM_033056:exon27:c.A3524G:p.N1175S,PCDH15:NM_001142763:exon28:c.A3539G:p.N1180S	D	D	D	.	D	L	T	N	T	T	D	D	23.5	1.061	0.993	Heyne_2018	Heyne_2018.92		simplex			male	NA	NA	NA
528	Lelieveld_92||10_55626595_T_C	exome	NDD	ID	10_55626595_T_C	10	55626595	T	C	65217	PCDH15	-	CDS			exonic	PCDH15	.	nonsynonymous SNV	PCDH15:NM_001142765:exon25:c.A3311G:p.N1104S,PCDH15:NM_001142767:exon26:c.A3413G:p.N1138S,PCDH15:NM_001142768:exon26:c.A3458G:p.N1153S,PCDH15:NM_001142773:exon26:c.A3458G:p.N1153S,PCDH15:NM_001142764:exon27:c.A3524G:p.N1175S,PCDH15:NM_001142766:exon27:c.A3524G:p.N1175S,PCDH15:NM_033056:exon27:c.A3524G:p.N1175S,PCDH15:NM_001142763:exon28:c.A3539G:p.N1180S	D	D	D	.	D	L	T	N	T	T	D	D	23.5	1.061	0.993	Lelieveld2016	Lelieveld_92						NA	NA	NA
529	14400.p1||10_55698706_C_T	exome	NDD	autism	10_55698706_C_T	10	55698706	C	T	65217	PCDH15	-	CDS			exonic	PCDH15	.	nonsynonymous SNV	PCDH15:NM_001142765:exon23:c.G3029A:p.G1010E,PCDH15:NM_001142767:exon24:c.G3131A:p.G1044E,PCDH15:NM_001142768:exon24:c.G3176A:p.G1059E,PCDH15:NM_001142773:exon24:c.G3176A:p.G1059E,PCDH15:NM_001142764:exon25:c.G3242A:p.G1081E,PCDH15:NM_001142766:exon25:c.G3242A:p.G1081E,PCDH15:NM_033056:exon25:c.G3242A:p.G1081E,PCDH15:NM_001142763:exon26:c.G3257A:p.G1086E	D	D	D	.	D	N	T	D	T	T	D	N	12.69	0.935	0.91	Iossifov;SSC_Iossifov_2014	14400.p1	;14400		;14400.fa	;14400.mo	;Male	NA	NA	NA
530	UK10K_SKUSE5080317||10_5788619_A_G	exome	NDD	autism	10_5788619_A_G	10	5788619	A	G	54906	FAM208B	+	CDS			exonic	FAM208B	.	nonsynonymous SNV	FAM208B:NM_001321785:exon15:c.A2992G:p.K998E,FAM208B:NM_017782:exon15:c.A3235G:p.K1079E,FAM208B:NM_001321783:exon16:c.A3235G:p.K1079E,FAM208B:NM_001321784:exon16:c.A3235G:p.K1079E	D	B	B	N	N	N	T	N	T	T	T	N	14.81	1.199	0.564	DeRubeis2014;De_Rubeis_2014	UK10K_SKUSE5080317	;UK10K_SKUSE5080317		;UK10K_SKUSE5208596	;UK10K_SKUSE5208597	;Male	NA	NA	NA
531	12240.s1||10_5791978_T_C	exome	control	control	10_5791978_T_C	10	5791978	T	C	54906	FAM208B	+	CDS			exonic	FAM208B	.	synonymous SNV	FAM208B:NM_001321785:exon15:c.T6351C:p.F2117F,FAM208B:NM_017782:exon15:c.T6594C:p.F2198F,FAM208B:NM_001321783:exon16:c.T6594C:p.F2198F,FAM208B:NM_001321784:exon16:c.T6594C:p.F2198F	.	.	.	.	.	.	.	.	.	.	.	.	.	.	.	Iossifov;Satterstrom2020	12240.s1	;12240		;12240.fa	;12240.mo	;Female	NA	NA	NA
532	MAE30||10_5808069_G_A	exome	NDD	EE	10_5808069_G_A	10	5808069	G	A	2665	GDI2	-	CDS			exonic	GDI2	.	nonsynonymous SNV	GDI2:NM_001115156:exon10:c.C1103T:p.T368M,GDI2:NM_001494:exon11:c.C1238T:p.T413M	T	D	D	D	D	M	D	D	D	D	D	D	24	1.048	0.976	Heyne_2018	MAE30		simplex			male	NA	NA	NA
533	DDDP107464||10_58118365_C_T	exome	NDD	DD	10_58118365_C_T	10	58118365	C	T	11130	ZWINT	-	CDS			exonic	ZWINT	.	synonymous SNV	ZWINT:NM_001005413:exon7:c.G603A:p.E201E,ZWINT:NM_007057:exon7:c.G744A:p.E248E,ZWINT:NM_032997:exon7:c.G744A:p.E248E	.	.	.	.	.	.	.	.	.	.	.	.	.	.	.	Heyne_2018	DDDP107464		simplex			male	NA	NA	NA
534	317_proband||10_5924978_A_G	exome	NDD	bipolar_type1	10_5924978_A_G	10	5924978	A	G	54522	ANKRD16	-	CDS			exonic	ANKRD16	.	synonymous SNV	ANKRD16:NM_001009941:exon5:c.T840C:p.Y280Y,ANKRD16:NM_001009943:exon5:c.T840C:p.Y280Y,ANKRD16:NM_019046:exon5:c.T840C:p.Y280Y	.	.	.	.	.	.	.	.	.	.	.	.	.	.	.	Kataoka2016	317_proband						NA	NA	NA
535	11252.p1||10_5963470_G_A	exome	NDD	autism	10_5963470_G_A	10	5963470	G	A	84893	FBXO18	+	CDS			exonic	FBXO18	.	nonsynonymous SNV	FBXO18:NM_001258452:exon15:c.G2038A:p.V680M,FBXO18:NM_178150:exon15:c.G2260A:p.V754M,FBXO18:NM_001258453:exon16:c.G2038A:p.V680M,FBXO18:NM_032807:exon16:c.G2413A:p.V805M	D	D	P	D	D	M	D	N	D	D	D	D	32	1.048	0.996	Satterstrom2020	11252.p1	11252		SSC02188	SSC02059	Male	NA	NA	NA
536	11318.p1||10_5979124_C_T	exome	NDD	autism	10_5979124_C_T	10	5979124	C	T	84893	FBXO18	+	CDS			exonic	FBXO18	.	stopgain	FBXO18:NM_178150:exon21:c.C3013T:p.Q1005X,FBXO18:NM_001258452:exon22:c.C2842T:p.Q948X,FBXO18:NM_001258453:exon22:c.C2791T:p.Q931X,FBXO18:NM_032807:exon22:c.C3166T:p.Q1056X	.	.	.	N	D	.	.	.	.	.	.	D	43	0.927	0.946	Iossifov;Satterstrom2020	11318.p1	;11318		;SSC02424	;SSC02410	;Male	NA	NA	NA
537	13744.s1||10_59955895_C_A	exome	control	control	10_59955895_C_A	10	59955895	C	A	253430	IPMK	-	CDS			exonic	IPMK	.	nonsynonymous SNV	IPMK:NM_152230:exon6:c.G1193T:p.G398V	D	D	D	D	D	M	T	D	T	T	D	D	29.2	0.81	0.872	Iossifov;Satterstrom2020	13744.s1	;13744		;13744.fa	;13744.mo	;Female	NA	NA	NA
538	ASDFI_1501||10_6002348_C_T	exome	NDD	autism	10_6002348_C_T	10	6002348	C	T	3601	IL15RA	-	CDS			exonic	IL15RA	.	nonsynonymous SNV	IL15RA:NM_001351097:exon3:c.G358A:p.A120T,IL15RA:NM_172200:exon3:c.G466A:p.A156T,IL15RA:NM_001243539:exon4:c.G457A:p.A153T,IL15RA:NM_001351095:exon4:c.G640A:p.A214T,IL15RA:NM_002189:exon4:c.G565A:p.A189T,IL15RA:NM_001256765:exon5:c.G823A:p.A275T,IL15RA:NM_001351096:exon5:c.G457A:p.A153T	T	B	B	N	N	N	T	N	T	T	T	N	16	-0.797	0.001	DeRubeis2014;Satterstrom2020	ASDFI_1501	;ASDFI_1501		;ASDFI_1498	;ASDFI_1499	;Male	NA	NA	NA
539	G01-GEA-288-HI||10_6002349_G_A	exome	NDD	autism	10_6002349_G_A	10	6002349	G	A	3601	IL15RA	-	CDS			exonic	IL15RA	.	synonymous SNV	IL15RA:NM_001351097:exon3:c.C357T:p.S119S,IL15RA:NM_172200:exon3:c.C465T:p.S155S,IL15RA:NM_001243539:exon4:c.C456T:p.S152S,IL15RA:NM_001351095:exon4:c.C639T:p.S213S,IL15RA:NM_002189:exon4:c.C564T:p.S188S,IL15RA:NM_001256765:exon5:c.C822T:p.S274S,IL15RA:NM_001351096:exon5:c.C456T:p.S152S	.	.	.	.	.	.	.	.	.	.	.	.	.	.	.	Satterstrom2020	G01-GEA-288-HI	G01-GEA-288-HI		G01-GEA-288-PA	G01-GEA-288-MA	Male	NA	NA	NA
540	DDDP117159||10_60150616_C_T	exome	NDD	DD	10_60150616_C_T	10	60150616	C	T	7019	TFAM	+	CDS			exonic	TFAM	.	nonsynonymous SNV	TFAM:NM_003201:exon5:c.C533T:p.P178L	T	P	B	N	N	L	T	N	T	T	T	N	13	0.935	0.044	Heyne_2018	DDDP117159		simplex			male	NA	NA	NA
541	08C73464||10_6019416_G_T	exome	NDD	autism	10_6019416_G_T	10	6019416	G	T	3601	IL15RA	-	CDS			exonic	IL15RA	.	nonsynonymous SNV	IL15RA:NM_001256765:exon1:c.C145A:p.L49I,IL15RA:NM_002189:exon1:c.C40A:p.L14I,IL15RA:NM_172200:exon1:c.C40A:p.L14I	D	P	B	N	N	M	T	N	T	T	D	N	19.18	-0.117	0.036	Satterstrom2020	08C73464	08C73464		08C73466	08C73465	Male	NA	NA	NA
542	657-05-104554||10_60273012_G_A	exome	NDD	autism	10_60273012_G_A	10	60273012	G	A	80114	BICC1	+	CDS			exonic	BICC1	.	nonsynonymous SNV	BICC1:NM_001080512:exon1:c.G109A:p.A37T	T	B	B	U	N	L	T	N	T	T	D	N	22.4	-0.015	0.969	Satterstrom2020	657-05-104554	657-05-104554		626-05-104560	625-05-104557	Male	NA	NA	NA
543	12367.p1||10_60558214_C_G	exome	NDD	autism	10_60558214_C_G	10	60558214	C	G	80114	BICC1	+	CDS			exonic	BICC1	.	synonymous SNV	BICC1:NM_001080512:exon11:c.C1422G:p.L474L	.	.	.	.	.	.	.	.	.	.	.	.	.	.	.	Satterstrom2020	12367.p1	12367		12367.fa	12367.mo	Male	NA	NA	NA
544	AU050A||10_61432662_C_A	exome	NDD	autism	10_61432662_C_A	10	61432662	C	A	220963	SLC16A9	-	CDS			exonic	SLC16A9	.	nonsynonymous SNV	SLC16A9:NM_194298:exon3:c.G206T:p.C69F,SLC16A9:NM_001323981:exon4:c.G206T:p.C69F	D	D	D	D	D	M	T	D	T	T	D	D	34	0.935	1	DeRubeis2014;Satterstrom2020	AU050A	;AU050A		;AU050B	;AU050C	;Male	NA	NA	NA
545	AU168A||10_61552824_G_C	exome	NDD	autism	10_61552824_G_C	10	61552824	G	C	8030	CCDC6	-	CDS			exonic	CCDC6	.	nonsynonymous SNV	CCDC6:NM_005436:exon9:c.C1276G:p.P426A	D	D	D	D	D	L	T	D	T	T	T	D	16.39	1.048	1	DeRubeis2014;Satterstrom2020	AU168A	;AU168A		;AU168B	;AU168C	;Male	NA	NA	NA
546	DDDP111479||10_61666028_G_A	exome	NDD	DD	10_61666028_G_A	10	61666028	G	A	8030	CCDC6	-	CDS			exonic	CCDC6	.	nonsynonymous SNV	CCDC6:NM_005436:exon1:c.C155T:p.S52L	D	D	D	D	D	L	D	N	D	D	D	N	32	1.048	1	Heyne_2018	DDDP111479		simplex			male	NA	NA	NA
547	DDDP111538||10_61827737_A_G	exome	NDD	DD	10_61827737_A_G	10	61827737	A	G	288	ANK3	-	CDS			exonic	ANK3	.	nonsynonymous SNV	ANK3:NM_001149:exon14:c.T1838C:p.I613T,ANK3:NM_001320874:exon36:c.T4436C:p.I1479T,ANK3:NM_001204403:exon37:c.T4418C:p.I1473T,ANK3:NM_001204404:exon37:c.T4439C:p.I1480T,ANK3:NM_020987:exon38:c.T12275C:p.I4092T	D	B	B	D	D	L	D	N	T	T	T	D	24.8	1.028	1	Heyne_2018	DDDP111538		simplex			female	NA	NA	NA
548	DDDP114534||10_61828440_T_C	exome	NDD	DD	10_61828440_T_C	10	61828440	T	C	288	ANK3	-	CDS			exonic	ANK3	.	nonsynonymous SNV	ANK3:NM_020987:exon37:c.A12199G:p.K4067E	T	D	D	D	D	L	T	N	T	T	D	D	22.7	0.964	1	Heyne_2018	DDDP114534		simplex			male	NA	NA	NA
549	DDDP111118||10_61828852_T_A	exome	NDD	DD	10_61828852_T_A	10	61828852	T	A	288	ANK3	-	CDS			exonic	ANK3	.	synonymous SNV	ANK3:NM_020987:exon37:c.A11787T:p.A3929A	.	.	.	.	.	.	.	.	.	.	.	.	.	.	.	Heyne_2018	DDDP111118		simplex			female	NA	NA	NA
550	DDDP107858||10_61830084_A_G	exome	NDD	DD	10_61830084_A_G	10	61830084	A	G	288	ANK3	-	CDS			exonic	ANK3	.	nonsynonymous SNV	ANK3:NM_020987:exon37:c.T10555C:p.Y3519H	D	D	P	N	D	M	T	N	T	T	T	D	25.3	1.088	1	Heyne_2018	DDDP107858		simplex			male	NA	NA	NA
551	25323.p1||10_61831783_G_A	exome	NDD	tourette_syndrome	10_61831783_G_A	10	61831783	G	A	288	ANK3	-	CDS			exonic	ANK3	.	synonymous SNV	ANK3:NM_020987:exon37:c.C8856T:p.S2952S	.	.	.	.	.	.	.	.	.	.	.	.	.	.	.	Willsey2017	25323.p1						NA	NA	NA
552	14016.p1||10_61833372_G_A	exome	NDD	autism	10_61833372_G_A	10	61833372	G	A	288	ANK3	-	CDS			exonic	ANK3	.	nonsynonymous SNV	ANK3:NM_020987:exon37:c.C7267T:p.R2423C	D	D	D	D	D	M	T	D	D	D	D	D	31	1.036	1	Iossifov;Satterstrom2020	14016.p1	;14016		;35996	;35998	;Male	NA	NA	NA
553	11540.p1||10_61833827_A_G	exome	NDD	autism;ASD	10_61833827_A_G	10	61833827	A	G	288	ANK3	-	CDS			exonic	ANK3	.	nonsynonymous SNV	ANK3:NM_020987:exon37:c.T6812C:p.M2271T	D	P	P	D	D	M	T	D	T	T	D	D	22.6	1.187	1	Iossifov;Heyne_2018;SSC_Iossifov_2014	11540.p1	;11540	;simplex	;11540.fa	;11540.mo	;male;Male	NA	NA	NA
554	25281.p1||10_61834024_T_C	exome	NDD	tourette_syndrome	10_61834024_T_C	10	61834024	T	C	288	ANK3	-	CDS			exonic	ANK3	.	synonymous SNV	ANK3:NM_020987:exon37:c.A6615G:p.P2205P	.	.	.	.	.	.	.	.	.	.	.	.	.	.	.	Willsey2017	25281.p1						NA	NA	NA
555	ASC_CA_81_A||10_61932078_G_C	exome	NDD	autism	10_61932078_G_C	10	61932078	G	C	288	ANK3	-	CDS||5'UTR			exonic	ANK3	.	synonymous SNV	ANK3:NM_001204404:exon21:c.C2415G:p.T805T,ANK3:NM_001320874:exon21:c.C2466G:p.T822T,ANK3:NM_020987:exon21:c.C2466G:p.T822T,ANK3:NM_001204403:exon22:c.C2448G:p.T816T	.	.	.	.	.	.	.	.	.	.	.	.	.	.	.	Satterstrom2020	ASC_CA_81_A	ASC_CA_81_A		ASC_CA_81_P	ASC_CA_81_M	Male	NA	NA	NA
556	09C83751||10_61932806_A_G	exome	NDD	autism	10_61932806_A_G	10	61932806	A	G	288	ANK3	-	intron			intronic	ANK3	.	.	.	.	.	.	.	.	.	.	.	.	.	.	.	.	.	.	Satterstrom2020	09C83751	09C83751		09C83752	09C83749	Male	NA	NA	NA
557	83|Lelieveld_83||10_61956322_A_G	exome	NDD	ID;ID	10_61956322_A_G	10	61956322	A	G	288	ANK3	-	CDS			exonic	ANK3	.	nonsynonymous SNV	ANK3:NM_001204404:exon15:c.T1700C:p.L567P,ANK3:NM_001320874:exon15:c.T1751C:p.L584P,ANK3:NM_020987:exon15:c.T1751C:p.L584P,ANK3:NM_001204403:exon16:c.T1733C:p.L578P	D	D	D	N	D	H	T	D	T	T	D	D	29.8	1.199	1	Heyne_2018;Lelieveld2016	83|Lelieveld_83		simplex;			male;	NA	NA	NA
558	25016.p1||10_61958166_G_A	exome	NDD	tourette_syndrome	10_61958166_G_A	10	61958166	G	A	288	ANK3	-	CDS			exonic	ANK3	.	stopgain	ANK3:NM_001204404:exon14:c.C1570T:p.R524X,ANK3:NM_001320874:exon14:c.C1621T:p.R541X,ANK3:NM_020987:exon14:c.C1621T:p.R541X,ANK3:NM_001204403:exon15:c.C1603T:p.R535X	.	.	.	N	A	.	.	.	.	.	.	D	39	0.017	0.993	Willsey2017	25016.p1						NA	NA	NA
559	11736.p1||10_61967911_G_A	exome	NDD	autism	10_61967911_G_A	10	61967911	G	A	288	ANK3	-	CDS||5'UTR			exonic	ANK3	.	synonymous SNV	ANK3:NM_001204404:exon10:c.C1026T:p.P342P,ANK3:NM_001320874:exon10:c.C1077T:p.P359P,ANK3:NM_020987:exon10:c.C1077T:p.P359P,ANK3:NM_001204403:exon11:c.C1059T:p.P353P	.	.	.	.	.	.	.	.	.	.	.	.	.	.	.	Satterstrom2020	11736.p1	11736		68642	68644	Male	NA	NA	NA
560	jk||10_62023645_T_C	exome	NDD	EE	10_62023645_T_C	10	62023645	T	C	288	ANK3	-	CDS||5'UTR			exonic	ANK3	.	nonsynonymous SNV	ANK3:NM_001204404:exon6:c.A596G:p.K199R,ANK3:NM_001320874:exon6:c.A647G:p.K216R,ANK3:NM_020987:exon6:c.A647G:p.K216R,ANK3:NM_001204403:exon7:c.A629G:p.K210R	T	P	P	D	D	N	T	D	T	T	D	D	24.3	1.061	0.564	Heyne_2018	jk		simplex			male	NA	NA	NA
561	80247814||10_6263490_G_A	exome	NDD	tourette_syndrome	10_6263490_G_A	10	6263490	G	A	5209	PFKFB3	+	CDS			exonic	PFKFB3	.	synonymous SNV	PFKFB3:NM_001145443:exon9:c.G918A:p.A306A,PFKFB3:NM_001282630:exon9:c.G1020A:p.A340A,PFKFB3:NM_001314063:exon9:c.G978A:p.A326A,PFKFB3:NM_001323016:exon9:c.G918A:p.A306A,PFKFB3:NM_001323017:exon9:c.G429A:p.A143A,PFKFB3:NM_004566:exon9:c.G978A:p.A326A	.	.	.	.	.	.	.	.	.	.	.	.	.	.	.	Willsey2017	80247814						NA	NA	NA
562	1635002||10_6265956_G_A	exome	NDD	autism	10_6265956_G_A	10	6265956	G	A	5209	PFKFB3	+	CDS			exonic	PFKFB3	.	nonsynonymous SNV	PFKFB3:NM_001145443:exon12:c.G1189A:p.V397I,PFKFB3:NM_001282630:exon12:c.G1291A:p.V431I,PFKFB3:NM_001314063:exon12:c.G1249A:p.V417I,PFKFB3:NM_001323016:exon12:c.G1189A:p.V397I,PFKFB3:NM_001323017:exon12:c.G700A:p.V234I,PFKFB3:NM_004566:exon12:c.G1249A:p.V417I	T	B	B	D	D	L	.	N	T	T	T	D	22.9	0.949	0.688	Satterstrom2020	1635002	1635002		1635011	1635012	Female	NA	NA	NA
563	DDDP111284||10_63170191_G_A	exome	NDD	DD	10_63170191_G_A	10	63170191	G	A	219623	TMEM26	-	CDS			exonic	TMEM26	.	synonymous SNV	TMEM26:NM_178505:exon6:c.C996T:p.T332T	.	.	.	.	.	.	.	.	.	.	.	.	.	.	.	Heyne_2018	DDDP111284		simplex			female	NA	NA	NA
564	DDDP111668||10_63173248_C_G	exome	NDD	DD	10_63173248_C_G	10	63173248	C	G	219623	TMEM26	-	CDS			exonic	TMEM26	.	nonsynonymous SNV	TMEM26:NM_178505:exon5:c.G651C:p.W217C	D	D	D	D	D	M	.	D	D	D	T	D	34	0.892	1	Heyne_2018	DDDP111668		simplex			female	NA	NA	NA
565	DDDP118367||10_63173250_A_C	exome	NDD	DD	10_63173250_A_C	10	63173250	A	C	219623	TMEM26	-	CDS			exonic	TMEM26	.	nonsynonymous SNV	TMEM26:NM_178505:exon5:c.T649G:p.W217G	D	D	D	D	D	M	.	D	D	T	D	D	28.9	1.14	0.998	Heyne_2018	DDDP118367		simplex			male	NA	NA	NA
566	400-08-110627||10_63817095_C_T	exome	NDD	autism	10_63817095_C_T	10	63817095	C	T	84159	ARID5B	+	intron			intronic	ARID5B	.	.	.	.	.	.	.	.	.	.	.	.	.	.	.	.	.	.	Satterstrom2020	400-08-110627	400-08-110627		373-08-110513	401-08-110628	Male	NA	NA	NA
567	13166.p1||10_63851326_G_C	exome	NDD	autism	10_63851326_G_C	10	63851326	G	C	84159	ARID5B	+	CDS			exonic	ARID5B	.	nonsynonymous SNV	ARID5B:NM_001244638:exon7:c.G1375C:p.A459P,ARID5B:NM_032199:exon10:c.G2104C:p.A702P	D	D	D	D	D	L	T	N	T	T	.	D	23.9	1.048	1	Krumm	13166.p1						NA	NA	NA
568	1711001||10_63851938_A_G	exome	NDD	autism	10_63851938_A_G	10	63851938	A	G	84159	ARID5B	+	CDS			exonic	ARID5B	.	nonsynonymous SNV	ARID5B:NM_001244638:exon7:c.A1987G:p.T663A,ARID5B:NM_032199:exon10:c.A2716G:p.T906A	D	D	P	D	D	M	T	N	T	T	T	D	22.4	1.199	0.845	Satterstrom2020	1711001	1711001		1711011	1711012	Male	NA	NA	NA
569	dn||10_63964649_T_C	exome	NDD	EE	10_63964649_T_C	10	63964649	T	C	219790	RTKN2	-	CDS			exonic	RTKN2	.	nonsynonymous SNV	RTKN2:NM_145307:exon10:c.A1153G:p.M385V	T	B	B	D	D	M	T	D	T	T	D	D	22.8	1.061	1	Heyne_2018	dn		simplex			male	NA	NA	NA
570	AGG0128||10_64135921_C_T	exome	NDD	autism	10_64135921_C_T	10	64135921	C	T	22891	ZNF365	+	intron			intronic	ZNF365	.	.	.	.	.	.	.	.	.	.	.	.	.	.	.	.	.	.	Satterstrom2020	AGG0128	AGG0128		AGG0250	AGG0249	Male	NA	NA	NA
571	DDDP102210||10_64136085_G_T	exome	NDD	DD	10_64136085_G_T	10	64136085	G	T	22891	ZNF365	+	CDS			exonic	ZNF365	.	nonsynonymous SNV	ZNF365:NM_014951:exon2:c.G133T:p.A45S,ZNF365:NM_199450:exon2:c.G133T:p.A45S,ZNF365:NM_199451:exon2:c.G133T:p.A45S	T	D	D	D	D	L	T	N	T	D	T	D	26.1	1.048	1	Heyne_2018	DDDP102210		simplex			male	NA	NA	NA
572	09C95778||10_6470365_T_C	exome	NDD	autism	10_6470365_T_C	10	6470365	T	C	5588	PRKCQ	-	intron			intronic	PRKCQ	.	.	.	.	.	.	.	.	.	.	.	.	.	.	.	.	.	.	Satterstrom2020	09C95778	09C95778		09C95777	09C95779	Male	NA	NA	NA
573	DDDP103120||10_64967030_C_T	exome	NDD	DD	10_64967030_C_T	10	64967030	C	T	221037	JMJD1C	-	CDS			exonic	JMJD1C	.	nonsynonymous SNV	JMJD1C:NM_001322254:exon8:c.G3742A:p.V1248I,JMJD1C:NM_001282948:exon9:c.G3853A:p.V1285I,JMJD1C:NM_001318153:exon9:c.G3535A:p.V1179I,JMJD1C:NM_001322252:exon9:c.G4285A:p.V1429I,JMJD1C:NM_001322258:exon9:c.G3742A:p.V1248I,JMJD1C:NM_001318154:exon10:c.G3853A:p.V1285I,JMJD1C:NM_032776:exon10:c.G4399A:p.V1467I	T	B	B	N	N	L	T	N	T	T	T	N	3.883	0.041	0.875	Heyne_2018	DDDP103120		simplex			male	NA	NA	NA
574	1339JS0017||10_64967942_T_C	exome	NDD	autism	10_64967942_T_C	10	64967942	T	C	221037	JMJD1C	-	CDS			exonic	JMJD1C	.	nonsynonymous SNV	JMJD1C:NM_001322254:exon8:c.A2830G:p.I944V,JMJD1C:NM_001282948:exon9:c.A2941G:p.I981V,JMJD1C:NM_001318153:exon9:c.A2623G:p.I875V,JMJD1C:NM_001322252:exon9:c.A3373G:p.I1125V,JMJD1C:NM_001322258:exon9:c.A2830G:p.I944V,JMJD1C:NM_001318154:exon10:c.A2941G:p.I981V,JMJD1C:NM_032776:exon10:c.A3487G:p.I1163V	T	B	B	N	N	N	T	N	T	T	T	D	0.412	0.146	0.999	DeRubeis2014;ASC_Neale2012	1339JS0017	;1339JS0017		;1339JS0015	;1339JS0016	;Male	NA	NA	NA
575	11546.s1||10_64968221_C_T	exome	control	control	10_64968221_C_T	10	64968221	C	T	221037	JMJD1C	-	CDS			exonic	JMJD1C	.	nonsynonymous SNV	JMJD1C:NM_001322254:exon8:c.G2551A:p.V851I,JMJD1C:NM_001282948:exon9:c.G2662A:p.V888I,JMJD1C:NM_001318153:exon9:c.G2344A:p.V782I,JMJD1C:NM_001322252:exon9:c.G3094A:p.V1032I,JMJD1C:NM_001322258:exon9:c.G2551A:p.V851I,JMJD1C:NM_001318154:exon10:c.G2662A:p.V888I,JMJD1C:NM_032776:exon10:c.G3208A:p.V1070I	T	B	B	N	N	L	T	N	T	T	T	N	0.016	-1.761	0.485	Iossifov;Satterstrom2020	11546.s1	;11546		;68609	;68611	;Male	NA	NA	NA
576	13306.s1||10_65140206_G_A	exome	control	control	10_65140206_G_A	10	65140206	G	A	221037	JMJD1C	-	CDS||5'UTR			exonic	JMJD1C	.	stopgain	JMJD1C:NM_001322252:exon2:c.C205T:p.R69X,JMJD1C:NM_032776:exon2:c.C205T:p.R69X	.	.	.	U	A	.	.	.	.	.	.	D	38	1.048	0.999	Iossifov;Satterstrom2020	13306.s1	;13306		;68745	;68747	;Male	NA	NA	NA
577	09C89982||10_6540488_C_T	exome	NDD	autism	10_6540488_C_T	10	6540488	C	T	5588	PRKCQ	-	CDS			exonic	PRKCQ	.	nonsynonymous SNV	PRKCQ:NM_001282645:exon4:c.G37A:p.G13S,PRKCQ:NM_001323266:exon4:c.G37A:p.G13S,PRKCQ:NM_001242413:exon5:c.G412A:p.G138S,PRKCQ:NM_001282644:exon5:c.G304A:p.G102S,PRKCQ:NM_001323265:exon5:c.G412A:p.G138S,PRKCQ:NM_001323267:exon5:c.G304A:p.G102S,PRKCQ:NM_006257:exon5:c.G412A:p.G138S	T	B	B	N	D	M	T	N	T	T	T	D	15.76	0.852	0.854	Satterstrom2020	09C89982	09C89982		09C89980	09C89981	Male	NA	NA	NA
578	13829.p1||10_68535201_C_A	exome	NDD	autism	10_68535201_C_A	10	68535201	C	A	29119	CTNNA3	-	intron			splicing	CTNNA3	NM_001127384:exon8:c.1128+1G>T;NM_013266:exon8:c.1128+1G>T	.	.	.	.	.	.	D	.	.	.	.	.	.	D	26	0.935	0.997	Iossifov;Satterstrom2020	13829.p1	;13829		;SSC09538	;SSC09528	;Female	NA	NA	NA
579	14425.s1||10_68687981_T_C	exome	control	control	10_68687981_T_C	10	68687981	T	C	347731	LRRTM3	+	CDS			exonic	LRRTM3	.	nonsynonymous SNV	LRRTM3:NM_178011:exon2:c.T1307C:p.L436P	D	D	D	D	D	M	T	D	D	D	D	D	26.9	1.061	0.992	Satterstrom2020	14425.s1	14425		14425.fa	14425.mo	Female	NA	NA	NA
580	EGAN00001101388||10_68940119_T_C	exome	NDD	autism	10_68940119_T_C	10	68940119	T	C	29119	CTNNA3	-	CDS			exonic	CTNNA3	.	nonsynonymous SNV	CTNNA3:NM_001127384:exon7:c.A1003G:p.I335V,CTNNA3:NM_013266:exon7:c.A1003G:p.I335V,CTNNA3:NM_001291133:exon8:c.A1039G:p.I347V	T	B	B	D	D	N	T	N	T	T	T	D	10.38	1.007	0.999	Satterstrom2020	EGAN00001101388	EGAN00001101388		EGAN00001100960	EGAN00001100959	Male	NA	NA	NA
581	13932.p1||10_69672259_A_G	exome	NDD	autism	10_69672259_A_G	10	69672259	A	G	23411	SIRT1	+	CDS			exonic	SIRT1	.	nonsynonymous SNV	SIRT1:NM_001314049:exon6:c.A477G:p.I159M,SIRT1:NM_001142498:exon7:c.A501G:p.I167M,SIRT1:NM_012238:exon8:c.A1386G:p.I462M	D	D	D	D	D	M	T	D	T	T	T	D	24.7	1.199	1	Krumm	13932.p1						NA	NA	NA
582	G01-GEA-112-HI||10_69792655_G_A	exome	NDD	autism	10_69792655_G_A	10	69792655	G	A	26091	HERC4	-	intron			intronic	HERC4	.	.	.	.	.	.	.	.	.	.	.	.	.	.	.	.	.	.	Satterstrom2020	G01-GEA-112-HI	G01-GEA-112-HI		G01-GEA-112-PA	G01-GEA-112-MA	Male	NA	NA	NA
583	ASC_CA_54_A||10_69882003_C_T	exome	NDD	autism	10_69882003_C_T	10	69882003	C	T	84665	MYPN	+	CDS||5'UTR			exonic	MYPN	.	nonsynonymous SNV	MYPN:NM_032578:exon2:c.C808T:p.R270W,MYPN:NM_001256267:exon3:c.C808T:p.R270W	D	D	P	N	D	L	T	D	T	T	D	D	26.9	0.935	1	Satterstrom2020	ASC_CA_54_A	ASC_CA_54_A		ASC_CA_54_P	ASC_CA_54_M	Male	NA	NA	NA
584	14202.s1||10_69934150_C_A	exome	control	control	10_69934150_C_A	10	69934150	C	A	84665	MYPN	+	CDS			exonic	MYPN	.	nonsynonymous SNV	MYPN:NM_032578:exon11:c.C2301A:p.H767Q,MYPN:NM_001256267:exon12:c.C2301A:p.H767Q,MYPN:NM_001256268:exon15:c.C1419A:p.H473Q	T	B	B	N	N	L	T	N	T	T	T	N	1.463	-0.422	0.363	Satterstrom2020	14202.s1	14202		14202.fa	14202.mo	Female	NA	NA	NA
585	13645.p1||10_70043988_C_T	exome	NDD	autism	10_70043988_C_T	10	70043988	C	T	64081	PBLD	-	CDS			exonic	PBLD	.	synonymous SNV	PBLD:NM_022129:exon10:c.G813A:p.R271R	.	.	.	.	.	.	.	.	.	.	.	.	.	.	.	Iossifov;Satterstrom2020	13645.p1	;13645		;SSC08461	;SSC08450	;Male	NA	NA	NA
586	13159.p1||10_70048699_G_A	exome	NDD	autism	10_70048699_G_A	10	70048699	G	A	64081	PBLD	-	CDS			exonic	PBLD	.	synonymous SNV	PBLD:NM_001033083:exon7:c.C501T:p.D167D,PBLD:NM_022129:exon7:c.C501T:p.D167D	.	.	.	.	.	.	.	.	.	.	.	.	.	.	.	Satterstrom2020	13159.p1	13159		SSC07020	SSC07017	Male	NA	NA	NA
587	13979.p1||10_70143890_T_C	exome	NDD	autism	10_70143890_T_C	10	70143890	T	C	55680	RUFY2	-	CDS			exonic	RUFY2	.	nonsynonymous SNV	RUFY2:NM_001042417:exon8:c.A638G:p.N213S,RUFY2:NM_001278225:exon8:c.A566G:p.N189S,RUFY2:NM_001330103:exon9:c.A740G:p.N247S,RUFY2:NM_017987:exon9:c.A845G:p.N282S	T	D	D	D	D	L	T	N	T	T	T	D	12.63	1.011	0.993	Iossifov;Satterstrom2020	13979.p1	;13979		;SSC09702	;SSC09698	;Male	NA	NA	NA
588	14099.p1||10_70161326_C_A	exome	NDD	autism	10_70161326_C_A	10	70161326	C	A	55680	RUFY2	-	intron			intronic	RUFY2	.	.	.	.	.	.	.	.	.	.	.	.	.	.	.	.	.	.	Satterstrom2020	14099.p1	14099		70445	70461	Male	NA	NA	NA
589	DDDP100796||10_70176578_T_C	exome	NDD	DD	10_70176578_T_C	10	70176578	T	C	1763	DNA2	-	CDS			exonic	DNA2	.	nonsynonymous SNV	DNA2:NM_001080449:exon20:c.A3002G:p.N1001S	D	D	D	D	D	H	D	D	D	D	D	D	26.3	0.889	0.996	Heyne_2018	DDDP100796		simplex			male	NA	NA	NA
590	DDDP110307||10_70178964_A_C	exome	NDD	DD	10_70178964_A_C	10	70178964	A	C	1763	DNA2	-	CDS			exonic	DNA2	.	nonsynonymous SNV	DNA2:NM_001080449:exon19:c.T2794G:p.C932G	D	D	D	D	D	L	D	D	T	T	D	D	26.4	1.035	0.132	Heyne_2018	DDDP110307		simplex			male	NA	NA	NA
591	UK10K_SKUSE5080263||10_70181995_A_C	exome	NDD	autism	10_70181995_A_C	10	70181995	A	C	1763	DNA2	-	CDS			exonic	DNA2	.	nonsynonymous SNV	DNA2:NM_001080449:exon17:c.T2684G:p.L895R	D	D	D	D	D	M	D	D	D	D	D	D	27.6	1.082	1	DeRubeis2014;De_Rubeis_2014	UK10K_SKUSE5080263	;UK10K_SKUSE5080263		;UK10K_SKUSE5208564	;UK10K_SKUSE5208565	;Female	NA	NA	NA
592	108||10_70246950_G_A	exome	NDD	ID	10_70246950_G_A	10	70246950	G	A	8034	SLC25A16	-	CDS			exonic	SLC25A16	.	nonsynonymous SNV	SLC25A16:NM_001324317:exon7:c.C391T:p.R131C,SLC25A16:NM_001324312:exon8:c.C793T:p.R265C,SLC25A16:NM_001324313:exon8:c.C793T:p.R265C,SLC25A16:NM_001324315:exon8:c.C499T:p.R167C,SLC25A16:NM_152707:exon8:c.C793T:p.R265C,SLC25A16:NM_001324314:exon9:c.C499T:p.R167C	.	D	D	D	D	H	.	.	D	D	D	D	33	1.047	0.994	Heyne_2018	108		simplex			female	NA	NA	NA
593	Lelieveld_108||10_70246950_G_A	exome	NDD	ID	10_70246950_G_A	10	70246950	G	A	8034	SLC25A16	-	CDS			exonic	SLC25A16	.	nonsynonymous SNV	SLC25A16:NM_001324317:exon7:c.C391T:p.R131C,SLC25A16:NM_001324312:exon8:c.C793T:p.R265C,SLC25A16:NM_001324313:exon8:c.C793T:p.R265C,SLC25A16:NM_001324315:exon8:c.C499T:p.R167C,SLC25A16:NM_152707:exon8:c.C793T:p.R265C,SLC25A16:NM_001324314:exon9:c.C499T:p.R167C	.	D	D	D	D	H	.	.	D	D	D	D	33	1.047	0.994	Lelieveld2016	Lelieveld_108						NA	NA	NA
594	EGAN00001101281||10_70332409_C_T	exome	NDD	autism	10_70332409_C_T	10	70332409	C	T	80312	TET1	+	CDS			exonic	TET1	.	nonsynonymous SNV	TET1:NM_030625:exon2:c.C314T:p.A105V	D	P	B	N	N	L	T	N	T	T	T	D	28.3	0.935	0.998	Satterstrom2020	EGAN00001101281	EGAN00001101281		EGAN00001101011	EGAN00001101010	Male	NA	NA	NA
595	G01-GEA-251-HI||10_70333221_T_C	exome	NDD	autism	10_70333221_T_C	10	70333221	T	C	80312	TET1	+	CDS			exonic	TET1	.	nonsynonymous SNV	TET1:NM_030625:exon2:c.T1126C:p.W376R	D	D	D	N	N	M	T	D	T	T	T	N	24	1.061	0.833	Satterstrom2020	G01-GEA-251-HI	G01-GEA-251-HI		G01-GEA-251-PA	G01-GEA-251-MA	Male	NA	NA	NA
596	11242.p1||10_70333978_A_G	exome	NDD	autism	10_70333978_A_G	10	70333978	A	G	80312	TET1	+	CDS			exonic	TET1	.	nonsynonymous SNV	TET1:NM_030625:exon2:c.A1883G:p.K628R	D	D	P	N	N	M	T	N	T	T	T	D	23.2	1.088	1	Iossifov;SSC_Iossifov_2014	11242.p1	;11242		;11242.fa	;11242.mo	;Male	NA	NA	NA
597	43155||10_70451080_C_A	exome	NDD	EE	10_70451080_C_A	10	70451080	C	A	80312	TET1	+	CDS			exonic	TET1	.	nonsynonymous SNV	TET1:NM_030625:exon12:c.C5920A:p.P1974T	T	B	B	N	N	M	T	N	T	T	T	N	22.9	0.935	0.004	Heyne_2018	43155		simplex			male	NA	NA	NA
598	DDDP107733||10_70509418_A_G	exome	NDD	DD	10_70509418_A_G	10	70509418	A	G	55749	CCAR1	+	CDS			exonic	CCAR1	.	nonsynonymous SNV	CCAR1:NM_001282959:exon9:c.A1049G:p.Q350R,CCAR1:NM_001282960:exon9:c.A1049G:p.Q350R,CCAR1:NM_018237:exon10:c.A1094G:p.Q365R	T	P	D	D	D	L	T	N	T	T	T	D	23.1	1.14	0.999	Heyne_2018	DDDP107733		simplex			male	NA	NA	NA
599	77349349||10_70546433_A_G	exome	NDD	tourette_syndrome	10_70546433_A_G	10	70546433	A	G	55749	CCAR1	+	CDS			exonic	CCAR1	.	nonsynonymous SNV	CCAR1:NM_001282959:exon20:c.A2819G:p.H940R,CCAR1:NM_001282960:exon20:c.A2819G:p.H940R,CCAR1:NM_018237:exon21:c.A2864G:p.H955R	T	P	B	D	D	L	T	N	D	T	T	D	18.46	1.088	1	Willsey2017	77349349						NA	NA	NA
600	DDDP106635||10_70546449_G_C	exome	NDD	DD	10_70546449_G_C	10	70546449	G	C	55749	CCAR1	+	CDS			exonic	CCAR1	.	nonsynonymous SNV	CCAR1:NM_001282959:exon20:c.G2835C:p.Q945H,CCAR1:NM_001282960:exon20:c.G2835C:p.Q945H,CCAR1:NM_018237:exon21:c.G2880C:p.Q960H	T	D	D	D	D	M	T	D	T	T	.	D	22.9	0.953	1	Heyne_2018	DDDP106635		simplex			female	NA	NA	NA
601	14251.p1||10_70670829_G_A	exome	NDD	autism	10_70670829_G_A	10	70670829	G	A	79009	DDX50	+	CDS			exonic	DDX50	.	nonsynonymous SNV	DDX50:NM_024045:exon4:c.G466A:p.G156R	D	P	P	N	D	L	T	D	T	T	D	D	29.1	0.998	1	Iossifov;Satterstrom2020	14251.p1	;14251		;14251.fa	;14251.mo	;Male	NA	NA	NA
602	DDDP102538||10_70673195_G_A	exome	NDD	DD	10_70673195_G_A	10	70673195	G	A	79009	DDX50	+	CDS			exonic	DDX50	.	nonsynonymous SNV	DDX50:NM_024045:exon6:c.G806A:p.R269H	D	D	P	D	D	H	T	D	T	T	D	D	29.8	0.953	1	Heyne_2018	DDDP102538		simplex			female	NA	NA	NA
603	30079.201||10_70673870_A_G	exome	NDD	autism	10_70673870_A_G	10	70673870	A	G	79009	DDX50	+	CDS			exonic	DDX50	.	synonymous SNV	DDX50:NM_024045:exon7:c.A999G:p.V333V	.	.	.	.	.	.	.	.	.	.	.	.	.	.	.	DeRubeis2014;Satterstrom2020	30079.2	;30079		;30079.102	;30079.101	;Male	NA	NA	NA
604	P1229||10_70694112_C_T	exome	NDD	autism	10_70694112_C_T	10	70694112	C	T	79009	DDX50	+	CDS			exonic	DDX50	.	nonsynonymous SNV	DDX50:NM_024045:exon9:c.C1397T:p.P466L	D	D	D	D	D	H	T	D	D	D	D	D	34	0.92	0.994	Hashimoto2015	P1229						NA	NA	NA
605	hs||10_70696723_G_T	exome	NDD	EE	10_70696723_G_T	10	70696723	G	T	79009	DDX50	+	CDS			exonic	DDX50	.	nonsynonymous SNV	DDX50:NM_024045:exon12:c.G1627T:p.D543Y	D	D	P	D	D	M	T	D	T	T	T	D	29	0.998	1	Heyne_2018	hs		simplex			female	NA	NA	NA
606	DDDP109890||10_70863816_T_C	exome	NDD	DD	10_70863816_T_C	10	70863816	T	C	5552	SRGN	+	CDS			exonic	SRGN	.	synonymous SNV	SRGN:NM_001321054:exon2:c.T249C:p.N83N,SRGN:NM_002727:exon3:c.T417C:p.N139N,SRGN:NM_001321053:exon4:c.T417C:p.N139N	.	.	.	.	.	.	.	.	.	.	.	.	.	.	.	Heyne_2018	DDDP109890		simplex			female	NA	NA	NA
607	DDDP110784||10_70940307_C_T	exome	NDD	DD	10_70940307_C_T	10	70940307	C	T	6832	SUPV3L1	+	CDS||5'UTR			exonic	SUPV3L1	.	nonsynonymous SNV	SUPV3L1:NM_003171:exon1:c.C260T:p.P87L	D	B	B	D	D	M	T	N	T	T	T	D	23.8	0.852	0.844	Heyne_2018	DDDP110784		simplex			male	NA	NA	NA
608	13289.p1||10_71025396_A_G	exome	NDD	autism	10_71025396_A_G	10	71025396	A	G	80201	HKDC1	+	CDS			exonic	HKDC1	.	nonsynonymous SNV	HKDC1:NM_025130:exon17:c.A2428G:p.S810G	T	B	B	D	D	L	D	N	D	D	D	D	15.04	1.199	0.989	Krumm;Satterstrom2020	13289.p1	;13289		;13289.fa	;13289.mo	;Male	NA	NA	NA
609	DDDP113361||10_71103582_G_C	exome	NDD	DD	10_71103582_G_C	10	71103582	G	C	3098	HK1	+	intron			splicing	HK1	NM_001322364:exon4:c.76-1G>C;NM_001322365:exon7:c.169-1G>C;NM_033497:exon5:c.76-1G>C;NM_033498:exon5:c.76-1G>C;NM_033500:exon6:c.28-1G>C;NM_033496:exon2:c.61-1G>C;NM_001322366:exon2:UTR5;NM_000188:exon2:c.64-1G>C;NM_001322367:exon2:c.64-1G>C	.	.	.	.	.	.	D	.	.	.	.	.	.	D	25.4	1.048	0.943	Heyne_2018	DDDP113361		simplex			male	NA	NA	NA
610	1410001||10_71129363_C_T	exome	NDD	autism	10_71129363_C_T	10	71129363	C	T	3098	HK1	+	CDS			exonic	HK1	.	synonymous SNV	HK1:NM_001322367:exon6:c.C762T:p.L254L,HK1:NM_000188:exon7:c.C858T:p.L286L,HK1:NM_001322366:exon7:c.C774T:p.L258L,HK1:NM_033496:exon7:c.C855T:p.L285L,HK1:NM_001322364:exon9:c.C870T:p.L290L,HK1:NM_033497:exon10:c.C870T:p.L290L,HK1:NM_033498:exon10:c.C870T:p.L290L,HK1:NM_033500:exon11:c.C822T:p.L274L,HK1:NM_001322365:exon12:c.C963T:p.L321L	.	.	.	.	.	.	.	.	.	.	.	.	.	.	.	Satterstrom2020	1410001	1410001		1410011	1410012	Male	NA	NA	NA
611	DDDP106858||10_71142311_C_T	exome	NDD	DD	10_71142311_C_T	10	71142311	C	T	3098	HK1	+	CDS			exonic	HK1	.	nonsynonymous SNV	HK1:NM_001322367:exon9:c.C1238T:p.S413L,HK1:NM_000188:exon10:c.C1334T:p.S445L,HK1:NM_001322366:exon10:c.C1250T:p.S417L,HK1:NM_033496:exon10:c.C1331T:p.S444L,HK1:NM_001322364:exon12:c.C1346T:p.S449L,HK1:NM_033497:exon13:c.C1346T:p.S449L,HK1:NM_033498:exon13:c.C1346T:p.S449L,HK1:NM_033500:exon14:c.C1298T:p.S433L,HK1:NM_001322365:exon15:c.C1439T:p.S480L	D	D	D	D	D	H	D	D	D	D	D	D	35	0.935	0.998	Heyne_2018	DDDP106858		simplex			female	NA	NA	NA
612	DDDP117879||10_71142347_C_T	exome	NDD	DD	10_71142347_C_T	10	71142347	C	T	3098	HK1	+	CDS			exonic	HK1	.	nonsynonymous SNV	HK1:NM_001322367:exon9:c.C1274T:p.T425M,HK1:NM_000188:exon10:c.C1370T:p.T457M,HK1:NM_001322366:exon10:c.C1286T:p.T429M,HK1:NM_033496:exon10:c.C1367T:p.T456M,HK1:NM_001322364:exon12:c.C1382T:p.T461M,HK1:NM_033497:exon13:c.C1382T:p.T461M,HK1:NM_033498:exon13:c.C1382T:p.T461M,HK1:NM_033500:exon14:c.C1334T:p.T445M,HK1:NM_001322365:exon15:c.C1475T:p.T492M	D	D	D	D	D	H	T	D	T	T	D	D	34	0.935	0.968	Heyne_2018	DDDP117879		simplex			male	NA	NA	NA
613	DDDP114161||10_71148986_G_A	exome	NDD	DD	10_71148986_G_A	10	71148986	G	A	3098	HK1	+	CDS			exonic	HK1	.	nonsynonymous SNV	HK1:NM_001322367:exon13:c.G1873A:p.D625N,HK1:NM_000188:exon14:c.G1969A:p.D657N,HK1:NM_001322366:exon14:c.G1885A:p.D629N,HK1:NM_033496:exon14:c.G1966A:p.D656N,HK1:NM_001322364:exon16:c.G1981A:p.D661N,HK1:NM_033497:exon17:c.G1981A:p.D661N,HK1:NM_033498:exon17:c.G1981A:p.D661N,HK1:NM_033500:exon18:c.G1933A:p.D645N,HK1:NM_001322365:exon19:c.G2074A:p.D692N	D	D	D	D	D	H	D	D	D	D	D	D	35	1.048	0.999	Heyne_2018	DDDP114161		simplex			male	NA	NA	NA
614	08C77921||10_71267358_T_C	exome	NDD	autism	10_71267358_T_C	10	71267358	T	C	23555	TSPAN15	+	3'UTR			UTR3	TSPAN15	NM_001351263:c.*624T>C;NM_012339:c.*624T>C	.	.	.	.	.	.	.	.	.	.	.	.	.	.	.	.	.	Satterstrom2020	08C77921	08C77921		08C77923	08C77924	Male	NA	NA	NA
615	EGAN00001101425||10_71332693_G_A	exome	NDD	autism	10_71332693_G_A	10	71332693	G	A	50674	NEUROG3	-	CDS			exonic	NEUROG3	.	nonsynonymous SNV	NEUROG3:NM_020999:exon2:c.C107T:p.P36L	D	D	B	U	D	M	D	N	D	D	D	D	26.3	0.94	0.472	Satterstrom2020	EGAN00001101425	EGAN00001101425		EGAN00001100878	EGAN00001100877	Male	NA	NA	NA
616	04C37819||10_71332699_G_A	exome	NDD	autism	10_71332699_G_A	10	71332699	G	A	50674	NEUROG3	-	CDS			exonic	NEUROG3	.	nonsynonymous SNV	NEUROG3:NM_020999:exon2:c.C101T:p.S34F	T	B	B	U	N	M	D	N	T	D	D	D	19.66	0.94	0.098	Satterstrom2020	04C37819	04C37819		04C37529	04C37528	Female	NA	NA	NA
617	13539.s2||10_71876348_C_T	exome	control	control	10_71876348_C_T	10	71876348	C	T	84883	AIFM2	-	intron			intronic	AIFM2	.	.	.	.	.	.	.	.	.	.	.	.	.	.	.	.	.	.	Satterstrom2020	13539.s2	13539		SSC08185	SSC08065	Female	NA	NA	NA
618	09C79967||10_7214654_G_C	exome	NDD	autism	10_7214654_G_C	10	7214654	G	C	57713	SFMBT2	-	intron			intronic	SFMBT2	.	.	.	.	.	.	.	.	.	.	.	.	.	.	.	.	.	.	Satterstrom2020	09C79967	09C79967		09C79951	09C79952	Male	NA	NA	NA
619	12957.p1||10_72291138_C_T	exome	NDD	autism	10_72291138_C_T	10	72291138	C	T	27143	KIAA1274	+	CDS			exonic	PALD1	.	synonymous SNV	PALD1:NM_014431:exon5:c.C561T:p.N187N	.	.	.	.	.	.	.	.	.	.	.	.	.	.	.	Iossifov;Satterstrom2020	12957.p1	;12957		;SSC06280	;SSC06272	;Female	NA	NA	NA
620	C1137-03||10_72326475_G_A	exome	NDD	tourette_syndrome	10_72326475_G_A	10	72326475	G	A	27143	KIAA1274	+	CDS			exonic	PALD1	.	nonsynonymous SNV	PALD1:NM_014431:exon20:c.G2557A:p.E853K	T	B	B	N	N	N	T	N	T	T	T	N	5.931	-0.829	0.004	Willsey2017	C1137-03						NA	NA	NA
621	13964.p1||10_72434714_C_G	exome	NDD	autism	10_72434714_C_G	10	72434714	C	G	140766	ADAMTS14	+	CDS			exonic	ADAMTS14	.	nonsynonymous SNV	ADAMTS14:NM_080722:exon2:c.C485G:p.P162R,ADAMTS14:NM_139155:exon2:c.C485G:p.P162R	T	D	D	D	D	M	T	D	T	T	T	D	23.6	0.892	0.997	Werling_WGS_call	13964.p1	13964		13964.fa	13964.mo	Male	NA	NA	NA
622	14308.s1||10_72489974_G_A	exome	control	control	10_72489974_G_A	10	72489974	G	A	140766	ADAMTS14	+	CDS			exonic	ADAMTS14	.	synonymous SNV	ADAMTS14:NM_080722:exon6:c.G1071A:p.V357V,ADAMTS14:NM_139155:exon6:c.G1071A:p.V357V	.	.	.	.	.	.	.	.	.	.	.	.	.	.	.	Iossifov;Satterstrom2020	14308.s1	;14308		;14308.fa	;14308.mo	;Male	NA	NA	NA
623	12362.p1||10_72534928_C_T	exome	NDD	autism	10_72534928_C_T	10	72534928	C	T	219793	TBATA	-	intron			intronic	TBATA	.	.	.	.	.	.	.	.	.	.	.	.	.	.	.	.	.	.	Iossifov;Satterstrom2020	12362.p1	;12362		;SSC04921	;SSC04915	;Male	NA	NA	NA
624	DDDP117895||10_72604329_A_G	exome	NDD	DD	10_72604329_A_G	10	72604329	A	G	8879	SGPL1	+	CDS			exonic	SGPL1	.	nonsynonymous SNV	SGPL1:NM_003901:exon3:c.A127G:p.I43V	T	B	B	D	D	L	T	N	T	T	T	D	8.701	1.088	0.992	Heyne_2018	DDDP117895		simplex			male	NA	NA	NA
625	14305.s1||10_73039593_G_C	exome	control	control	10_73039593_G_C	10	73039593	G	C	219699	UNC5B	+	CDS			exonic	UNC5B	.	nonsynonymous SNV	UNC5B:NM_001244889:exon2:c.G95C:p.S32T,UNC5B:NM_170744:exon2:c.G95C:p.S32T	T	B	B	N	N	L	T	N	T	T	T	D	9.762	0.813	0.477	Iossifov	14305.s1						NA	NA	NA
626	UK10K_SKUSE5080234||10_73046511_C_T	exome	NDD	autism	10_73046511_C_T	10	73046511	C	T	219699	UNC5B	+	CDS			exonic	UNC5B	.	synonymous SNV	UNC5B:NM_001244889:exon5:c.C618T:p.I206I,UNC5B:NM_170744:exon5:c.C618T:p.I206I	.	.	.	.	.	.	.	.	.	.	.	.	.	.	.	DeRubeis2014;De_Rubeis_2014	UK10K_SKUSE5080234	;UK10K_SKUSE5080234		;UK10K_SKUSE5208528	;UK10K_SKUSE5208529	;Male	NA	NA	NA
627	09C80113||10_73050770_C_T	exome	NDD	autism	10_73050770_C_T	10	73050770	C	T	219699	UNC5B	+	CDS			exonic	UNC5B	.	nonsynonymous SNV	UNC5B:NM_001244889:exon8:c.C1165T:p.R389C,UNC5B:NM_170744:exon9:c.C1198T:p.R400C	T	D	D	D	D	M	T	D	T	T	D	D	28.2	0.935	0.49	Satterstrom2020	09C80113	09C80113		09C80115	09C80114	Male	NA	NA	NA
628	DDDP117233||10_73053527_A_G	exome	NDD	DD	10_73053527_A_G	10	73053527	A	G	219699	UNC5B	+	CDS			exonic	UNC5B	.	nonsynonymous SNV	UNC5B:NM_001244889:exon12:c.A1979G:p.H660R,UNC5B:NM_170744:exon13:c.A2012G:p.H671R	D	D	D	D	D	M	T	D	T	T	D	D	23.4	1.199	1	Heyne_2018	DDDP117233		simplex			male	NA	NA	NA
629	11611.s1||10_73377204_A_C	exome	control	control	10_73377204_A_C	10	73377204	A	C	64072	CDH23	+	CDS			exonic	CDH23	.	synonymous SNV	CDH23:NM_001171932:exon11:c.A1188C:p.P396P	.	.	.	.	.	.	.	.	.	.	.	.	.	.	.	Satterstrom2020	11611.s1	11611		SSC02351	SSC02339	Male	NA	NA	NA
630	14412.s1||10_73461916_C_T	exome	control	control	10_73461916_C_T	10	73461916	C	T	64072	CDH23	+	CDS			exonic	CDH23	.	synonymous SNV	CDH23:NM_001171930:exon22:c.C2535T:p.P845P,CDH23:NM_001171931:exon22:c.C2535T:p.P845P,CDH23:NM_022124:exon22:c.C2535T:p.P845P	.	.	.	.	.	.	.	.	.	.	.	.	.	.	.	Iossifov;Satterstrom2020	14412.s1	;14412		;14412.fa	;14412.mo	;Female	NA	NA	NA
631	DEASD_0439_001||10_73464800_G_A	exome	NDD	autism	10_73464800_G_A	10	73464800	G	A	64072	CDH23	+	CDS			exonic	CDH23	.	nonsynonymous SNV	CDH23:NM_001171930:exon24:c.G2866A:p.E956K,CDH23:NM_001171931:exon24:c.G2866A:p.E956K,CDH23:NM_022124:exon24:c.G2866A:p.E956K	.	D	D	D	D	H	.	.	D	D	D	D	34	1.048	0.98	DeRubeis2014;Satterstrom2020	DEASD_0439_001	;DEASD_0439_001		;DEASD_0439_500	;DEASD_0439_600	;Female	NA	NA	NA
632	10C109080||10_73491982_C_T	exome	NDD	autism	10_73491982_C_T	10	73491982	C	T	64072	CDH23	+	CDS			exonic	CDH23	.	synonymous SNV	CDH23:NM_001171930:exon31:c.C3954T:p.Y1318Y,CDH23:NM_022124:exon31:c.C3954T:p.Y1318Y	.	.	.	.	.	.	.	.	.	.	.	.	.	.	.	DeRubeis2014;Satterstrom2020	10C109080	;10C109080		;10C109081	;10C109082	;Male	NA	NA	NA
633	08C75913||10_73548731_A_G	exome	NDD	autism	10_73548731_A_G	10	73548731	A	G	64072	CDH23	+	CDS			exonic	CDH23	.	nonsynonymous SNV	CDH23:NM_022124:exon43:c.A5855G:p.E1952G	.	D	P	D	D	M	.	.	T	T	D	D	22.8	1.199	0.715	Satterstrom2020	08C75913	08C75913		08C75915	08C75914	Male	NA	NA	NA
634	DDDP112327||10_73571142_G_A	exome	NDD	DD	10_73571142_G_A	10	73571142	G	A	64072	CDH23	+	CDS			exonic	CDH23	.	nonsynonymous SNV	CDH23:NM_001171933:exon16:c.G2428A:p.V810M,CDH23:NM_001171934:exon16:c.G2428A:p.V810M,CDH23:NM_022124:exon61:c.G9148A:p.V3050M	D	D	D	D	D	L	T	N	T	T	D	D	32	1.044	0.986	Heyne_2018	DDDP112327		simplex			female	NA	NA	NA
635	DDDP101035||10_73578867_C_G	exome	NDD	DD	10_73578867_C_G	10	73578867	C	G	5660	PSAP	-	CDS			exonic	PSAP	.	nonsynonymous SNV	PSAP:NM_001042466:exon12:c.G1358C:p.C453S,PSAP:NM_002778:exon12:c.G1352C:p.C451S,PSAP:NM_001042465:exon13:c.G1361C:p.C454S	D	D	D	D	D	H	D	D	D	D	D	D	26.4	0.892	0.18	Heyne_2018	DDDP101035		simplex			female	NA	NA	NA
636	DDDP107601||10_73587854_G_A	exome	NDD	DD	10_73587854_G_A	10	73587854	G	A	5660	PSAP	-	CDS			exonic	PSAP	.	nonsynonymous SNV	PSAP:NM_001042465:exon6:c.C637T:p.R213W,PSAP:NM_001042466:exon6:c.C637T:p.R213W,PSAP:NM_002778:exon6:c.C637T:p.R213W	D	D	D	D	D	M	D	D	D	D	D	D	32	0.126	0.966	Heyne_2018	DDDP107601		simplex			female	NA	NA	NA
637	1155-1||10_73610978_T_C	exome	NDD	schizophrenia	10_73610978_T_C	10	73610978	T	C	5660	PSAP	-	CDS			exonic	PSAP	.	nonsynonymous SNV	PSAP:NM_001042465:exon1:c.A1G:p.M1V,PSAP:NM_001042466:exon1:c.A1G:p.M1V,PSAP:NM_002778:exon1:c.A1G:p.M1V	D	P	P	N	D	.	T	N	T	T	.	D	21.7	0.9	0.144	Fromer2014	1155-1						NA	NA	NA
638	DEASD_1014_001||10_73856933_G_A	exome	NDD	autism	10_73856933_G_A	10	73856933	G	A	51008	ASCC1	-	3'UTR			UTR3	ASCC1	NM_001198799:c.*311C>T;NM_001198798:c.*159C>T;NM_001198800:c.*159C>T	.	.	.	.	.	.	.	.	.	.	.	.	.	.	.	.	.	Satterstrom2020	DEASD_1014_001	DEASD_1014_001		DEASD_1014_500	DEASD_1014_600	Male	NA	NA	NA
639	20-0809320-17||10_74620239_G_A	exome	NDD	autism	10_74620239_G_A	10	74620239	G	A	90550	MCU	+	CDS			exonic	MCU	.	synonymous SNV	MCU:NM_001270679:exon4:c.G450A:p.K150K,MCU:NM_001270680:exon4:c.G303A:p.K101K,MCU:NM_138357:exon4:c.G450A:p.K150K	.	.	.	.	.	.	.	.	.	.	.	.	.	.	.	Satterstrom2020	20-0809320-17	20-0809320-17		20-0809319-17	20-0809317-15	Male	NA	NA	NA
640	DDDP119732||10_74658783_C_T	exome	NDD	DD	10_74658783_C_T	10	74658783	C	T	170392	OIT3	+	CDS			exonic	OIT3	.	synonymous SNV	OIT3:NM_152635:exon2:c.C423T:p.H141H	.	.	.	.	.	.	.	.	.	.	.	.	.	.	.	Heyne_2018	DDDP119732		simplex			male	NA	NA	NA
641	397||10_74684370_C_T	exome	NDD	ID	10_74684370_C_T	10	74684370	C	T	170392	OIT3	+	CDS			exonic	OIT3	.	synonymous SNV	OIT3:NM_152635:exon7:c.C1335T:p.D445D	.	.	.	.	.	.	.	.	.	.	.	.	.	.	.	Heyne_2018	397		simplex			male	NA	NA	NA
642	Lelieveld_397||10_74684370_C_T	exome	NDD	ID	10_74684370_C_T	10	74684370	C	T	170392	OIT3	+	CDS			exonic	OIT3	.	synonymous SNV	OIT3:NM_152635:exon7:c.C1335T:p.D445D	.	.	.	.	.	.	.	.	.	.	.	.	.	.	.	Lelieveld2016	Lelieveld_397						NA	NA	NA
643	14579.s1||10_74701046_T_C	exome	control	control	10_74701046_T_C	10	74701046	T	C	84647	PLA2G12B	-	CDS			exonic	PLA2G12B	.	nonsynonymous SNV	PLA2G12B:NM_001318125:exon2:c.A77G:p.D26G,PLA2G12B:NM_001318124:exon3:c.A347G:p.D116G,PLA2G12B:NM_032562:exon3:c.A347G:p.D116G	D	D	D	D	D	M	.	D	D	D	D	D	28	1.061	0.998	Iossifov;Satterstrom2020	14579.s1	;14579		;36920	;36922	;Male	NA	NA	NA
644	DDDP106279||10_74894441_G_C	exome	NDD	DD	10_74894441_G_C	10	74894441	G	C	11319	ECD	-	CDS			exonic	ECD	.	nonsynonymous SNV	ECD:NM_001135753:exon13:c.C1706G:p.A569G,ECD:NM_007265:exon14:c.C1835G:p.A612G,ECD:NM_001135752:exon15:c.C1934G:p.A645G	T	D	P	D	D	L	T	D	T	T	T	D	25.3	1.048	0.999	Heyne_2018	DDDP106279		simplex			female	NA	NA	NA
645	13928.p1||10_74896584_C_T	exome	NDD	autism;ASD	10_74896584_C_T	10	74896584	C	T	11319	ECD	-	CDS			exonic	ECD	.	nonsynonymous SNV	ECD:NM_001135753:exon12:c.G1453A:p.E485K,ECD:NM_007265:exon13:c.G1582A:p.E528K,ECD:NM_001135752:exon14:c.G1681A:p.E561K	T	B	B	N	N	M	T	N	T	T	T	N	9.61	-0.32	0	Iossifov;Heyne_2018;Satterstrom2020	13928.p1	;13928	;simplex	;SSC09962	;SSC09949	;male;Male	NA	NA	NA
646	12492.s1||10_74968485_C_T	exome	control	control	10_74968485_C_T	10	74968485	C	T	317662	FAM149B1	+	CDS			exonic	FAM149B1	.	synonymous SNV	FAM149B1:NM_173348:exon6:c.C651T:p.D217D	.	.	.	.	.	.	.	.	.	.	.	.	.	.	.	Satterstrom2020	12492.s1	12492		12492.fa	12492.mo	Male	NA	NA	NA
647	08C75910||10_74992952_C_T	exome	NDD	autism	10_74992952_C_T	10	74992952	C	T	317662	FAM149B1	+	exon_unclassified			intronic	FAM149B1	.	.	.	.	.	.	.	.	.	.	.	.	.	.	.	.	.	.	Satterstrom2020	08C75910	08C75910		08C75912	08C75911	Male	NA	NA	NA
648	AU153A||10_75139753_C_G	exome	NDD	autism	10_75139753_C_G	10	75139753	C	G	310	ANXA7	-	intron			intronic	ANXA7	.	.	.	.	.	.	.	.	.	.	.	.	.	.	.	.	.	.	Satterstrom2020	AU153A	AU153A		AU153B	AU153C	Male	NA	NA	NA
649	DDDP108313||10_75184886_T_C	exome	NDD	DD	10_75184886_T_C	10	75184886	T	C	118490	MSS51	-	CDS			exonic	MSS51	.	nonsynonymous SNV	MSS51:NM_001024593:exon6:c.A1133G:p.Y378C	D	D	D	D	D	M	T	D	T	T	D	D	26.8	1.061	0.998	Heyne_2018	DDDP108313		simplex			female	NA	NA	NA
650	12929.s1||10_75264682_G_A	exome	control	control	10_75264682_G_A	10	75264682	G	A	159195	USP54	-	CDS			exonic	USP54	.	nonsynonymous SNV	USP54:NM_001320437:exon20:c.C4051T:p.R1351C,USP54:NM_001350995:exon20:c.C3946T:p.R1316C,USP54:NM_152586:exon20:c.C4237T:p.R1413C	D	B	B	.	N	L	T	N	T	T	T	D	24.2	0.714	0.99	Iossifov;Satterstrom2020	12929.s1	;12929		;SSC06637	;SSC06620	;Female	NA	NA	NA
651	DDDP114829||10_75393793_A_G	exome	NDD	DD	10_75393793_A_G	10	75393793	A	G	58529	MYOZ1	-	CDS			exonic	MYOZ1	.	nonsynonymous SNV	MYOZ1:NM_021245:exon5:c.T533C:p.I178T	T	B	B	N	D	N	T	N	T	T	T	D	16.21	1.199	1	Heyne_2018	DDDP114829		simplex			female	NA	NA	NA
652	14231.p1||10_75457367_C_T	exome	NDD	autism	10_75457367_C_T	10	75457367	C	T	729092	AGAP5	-	CDS			exonic	AGAP5	.	synonymous SNV	AGAP5:NM_001144000:exon1:c.G147A:p.V49V	.	.	.	.	.	.	.	.	.	.	.	.	.	.	.	Iossifov	14231.p1						NA	NA	NA
653	13702.p1||10_75526308_C_T	exome	NDD	autism	10_75526308_C_T	10	75526308	C	T	9632	SEC24C	+	intron			intronic	SEC24C	.	.	.	.	.	.	.	.	.	.	.	.	.	.	.	.	.	.	Iossifov	13702.p1						NA	NA	NA
654	AU146A||10_75535200_A_G	exome	NDD	autism	10_75535200_A_G	10	75535200	A	G	170384	FUT11	+	CDS			exonic	FUT11	.	nonsynonymous SNV	FUT11:NM_001284194:exon3:c.A1358G:p.H453R	T	B	B	.	N	.	T	N	T	T	T	N	8.293	-0.374	0.021	DeRubeis2014;Satterstrom2020	AU146A	;AU146A		;AU146B	;AU146C	;Male	NA	NA	NA
655	ef||10_75550928_T_C	exome	NDD	EE	10_75550928_T_C	10	75550928	T	C	23053	KIAA0913	+	CDS			exonic	ZSWIM8	.	synonymous SNV	ZSWIM8:NM_001242487:exon8:c.T1137C:p.Y379Y,ZSWIM8:NM_001242488:exon8:c.T1137C:p.Y379Y,ZSWIM8:NM_015037:exon8:c.T1137C:p.Y379Y	.	.	.	.	.	.	.	.	.	.	.	.	.	.	.	Heyne_2018	ef		simplex			male	NA	NA	NA
656	DDDP120164||10_75551148_C_T	exome	NDD	DD	10_75551148_C_T	10	75551148	C	T	23053	KIAA0913	+	CDS			exonic	ZSWIM8	.	nonsynonymous SNV	ZSWIM8:NM_001242487:exon9:c.C1210T:p.R404C,ZSWIM8:NM_001242488:exon9:c.C1210T:p.R404C,ZSWIM8:NM_015037:exon9:c.C1210T:p.R404C	D	D	D	U	D	M	T	D	D	D	D	D	33	0.892	0.998	Heyne_2018	DDDP120164		simplex			male	NA	NA	NA
657	DDDP113861||10_75551826_G_A	exome	NDD	DD	10_75551826_G_A	10	75551826	G	A	23053	KIAA0913	+	CDS||5'UTR			exonic	ZSWIM8	.	nonsynonymous SNV	ZSWIM8:NM_001242487:exon10:c.G1529A:p.R510Q,ZSWIM8:NM_001242488:exon10:c.G1529A:p.R510Q,ZSWIM8:NM_015037:exon10:c.G1529A:p.R510Q	D	P	B	U	D	L	T	N	T	T	T	D	22.9	1.048	1	Heyne_2018	DDDP113861		simplex			female	NA	NA	NA
658	DDDP108647||10_75552084_A_G	exome	NDD	DD	10_75552084_A_G	10	75552084	A	G	23053	KIAA0913	+	CDS			exonic	ZSWIM8	.	nonsynonymous SNV	ZSWIM8:NM_001242487:exon10:c.A1787G:p.K596R,ZSWIM8:NM_001242488:exon10:c.A1787G:p.K596R,ZSWIM8:NM_015037:exon10:c.A1787G:p.K596R	T	P	B	U	N	N	T	N	T	T	T	D	10.37	1.199	0.999	Heyne_2018	DDDP108647		simplex			male	NA	NA	NA
659	DDDP118448||10_75556951_C_T	exome	NDD	DD	10_75556951_C_T	10	75556951	C	T	23053	KIAA0913	+	CDS			exonic	ZSWIM8	.	nonsynonymous SNV	ZSWIM8:NM_001242487:exon17:c.C3340T:p.R1114C,ZSWIM8:NM_001242488:exon17:c.C3340T:p.R1114C,ZSWIM8:NM_015037:exon17:c.C3355T:p.R1119C	D	D	D	U	D	L	T	N	T	T	D	D	33	0.852	0.994	Heyne_2018	DDDP118448		simplex			female	NA	NA	NA
660	13735.p1||10_75560469_C_G	exome	NDD	autism;ASD	10_75560469_C_G	10	75560469	C	G	23053	KIAA0913	+	CDS			exonic	ZSWIM8	.	nonsynonymous SNV	ZSWIM8:NM_001242487:exon24:c.C5083G:p.P1695A,ZSWIM8:NM_001242488:exon24:c.C5059G:p.P1687A,ZSWIM8:NM_015037:exon24:c.C5098G:p.P1700A	T	D	D	.	D	L	T	D	T	T	D	D	23.3	0.935	1	Iossifov;Heyne_2018;Satterstrom2020	13735.p1	;13735	;simplex	;35964	;35966	;male;Male	NA	NA	NA
661	1693001||10_75560523_A_C	exome	NDD	autism	10_75560523_A_C	10	75560523	A	C	100507331	LOC100507331	-	intron			ncRNA_intronic	ZSWIM8-AS1	.	.	.	.	.	.	.	.	.	.	.	.	.	.	.	.	.	.	Satterstrom2020	1693001	1693001		1693011	1693012	Male	NA	NA	NA
662	AU062A||10_75563158_G_C	exome	NDD	autism	10_75563158_G_C	10	75563158	G	C	8509	NDST2	-	intron			intronic	NDST2	.	.	.	.	.	.	.	.	.	.	.	.	.	.	.	.	.	.	Satterstrom2020	AU062A	AU062A		AU062B	AU062C	Male	NA	NA	NA
663	NDAR_INVRL653EH1_wes1||10_75566524_C_T	exome	NDD	autism	10_75566524_C_T	10	75566524	C	T	8509	NDST2	-	CDS			exonic	NDST2	.	nonsynonymous SNV	NDST2:NM_001330107:exon5:c.G1139A:p.R380H,NDST2:NM_003635:exon5:c.G1139A:p.R380H	D	D	P	D	D	L	T	N	T	T	T	D	25.4	0.925	0.998	DeRubeis2014;De_Rubeis_2014	NDAR_INVRL653EH1_wes1	;NDAR_INVRL653EH1_wes1		;NDAR_INVXE992JKA_wes1	;NDAR_INVVR549TVN_wes1	;Male	NA	NA	NA
664	32_de_Ligt||10_75602244_C_G	exome	NDD	ID	10_75602244_C_G	10	75602244	C	G	818	CAMK2G	-	CDS			exonic	CAMK2G	.	nonsynonymous SNV	CAMK2G:NM_001204492:exon11:c.G875C:p.R292P,CAMK2G:NM_001222:exon11:c.G875C:p.R292P,CAMK2G:NM_001320898:exon11:c.G875C:p.R292P,CAMK2G:NM_172169:exon11:c.G875C:p.R292P,CAMK2G:NM_172170:exon11:c.G875C:p.R292P,CAMK2G:NM_172171:exon11:c.G875C:p.R292P,CAMK2G:NM_172173:exon11:c.G875C:p.R292P	D	B	B	D	D	L	T	D	T	T	D	D	34	0.925	1	Heyne_2018	32_de_Ligt		simplex			male	NA	NA	NA
665	deLigt32||10_75602244_C_G	exome	NDD	ID	10_75602244_C_G	10	75602244	C	G	818	CAMK2G	-	CDS			exonic	CAMK2G	.	nonsynonymous SNV	CAMK2G:NM_001204492:exon11:c.G875C:p.R292P,CAMK2G:NM_001222:exon11:c.G875C:p.R292P,CAMK2G:NM_001320898:exon11:c.G875C:p.R292P,CAMK2G:NM_172169:exon11:c.G875C:p.R292P,CAMK2G:NM_172170:exon11:c.G875C:p.R292P,CAMK2G:NM_172171:exon11:c.G875C:p.R292P,CAMK2G:NM_172173:exon11:c.G875C:p.R292P	D	B	B	D	D	L	T	D	T	T	D	D	34	0.925	1	deLigt2012	deLigt32						NA	NA	NA
666	DEASD_0225_001||10_75608997_C_T	exome	NDD	autism	10_75608997_C_T	10	75608997	C	T	818	CAMK2G	-	intron			intronic	CAMK2G	.	.	.	.	.	.	.	.	.	.	.	.	.	.	.	.	.	.	Satterstrom2020	DEASD_0225_001	DEASD_0225_001		DEASD_0225_500	DEASD_0225_600	Female	NA	NA	NA
667	58290867||10_75612063_T_C	exome	NDD	tourette_syndrome	10_75612063_T_C	10	75612063	T	C	818	CAMK2G	-	CDS			exonic	CAMK2G	.	nonsynonymous SNV	CAMK2G:NM_001204492:exon5:c.A290G:p.E97G,CAMK2G:NM_001222:exon5:c.A290G:p.E97G,CAMK2G:NM_001320898:exon5:c.A290G:p.E97G,CAMK2G:NM_172169:exon5:c.A290G:p.E97G,CAMK2G:NM_172170:exon5:c.A290G:p.E97G,CAMK2G:NM_172171:exon5:c.A290G:p.E97G,CAMK2G:NM_172173:exon5:c.A290G:p.E97G	D	B	B	D	D	M	T	D	T	T	.	D	31	1.061	0.998	Willsey2017	58290867						NA	NA	NA
668	DDDP116680||10_75674582_G_A	exome	NDD	DD	10_75674582_G_A	10	75674582	G	A	5328	PLAU	+	CDS			exonic	PLAU	.	nonsynonymous SNV	PLAU:NM_001145031:exon8:c.G827A:p.R276Q,PLAU:NM_001319191:exon8:c.G620A:p.R207Q,PLAU:NM_002658:exon9:c.G878A:p.R293Q	T	B	B	N	N	L	T	N	T	T	T	N	24.8	0.953	0.969	Heyne_2018	DDDP116680		simplex			male	NA	NA	NA
669	13578.s1||10_75830846_G_C	exome	control	control	10_75830846_G_C	10	75830846	G	C	7414	VCL	+	intron			intronic	VCL	.	.	.	.	.	.	.	.	.	.	.	.	.	.	.	.	.	.	Satterstrom2020	13578.s1	13578		SSC08283	SSC08273	Female	NA	NA	NA
670	14402.s1||10_75860760_A_G	exome	control	control	10_75860760_A_G	10	75860760	A	G	7414	VCL	+	CDS			exonic	VCL	.	nonsynonymous SNV	VCL:NM_003373:exon14:c.A1927G:p.T643A,VCL:NM_014000:exon14:c.A1927G:p.T643A	D	P	D	D	D	M	T	D	T	T	D	D	25	1.083	0.887	Iossifov;Satterstrom2020	14402.s1	;14402		;36155	;36157	;Male	NA	NA	NA
671	NDAR_INVYH284TCH_wes1||10_75863536_G_A	exome	NDD	autism	10_75863536_G_A	10	75863536	G	A	7414	VCL	+	intron			intronic	VCL	.	.	.	.	.	.	.	.	.	.	.	.	.	.	.	.	.	.	De_Rubeis_2014	NDAR_INVYH284TCH_wes1	NDAR_INVYH284TCH_wes1		NDAR_INVBF720BMV_wes1	NDAR_INVTU877FH8_wes1	Female	NA	NA	NA
672	1397021||10_75874562_C_T	exome	NDD	autism	10_75874562_C_T	10	75874562	C	T	7414	VCL	+	CDS			exonic	VCL	.	stopgain	VCL:NM_003373:exon20:c.C2959T:p.R987X,VCL:NM_014000:exon21:c.C3163T:p.R1055X	.	.	.	D	A	.	.	.	.	.	.	D	53	0.935	1	Satterstrom2020	1397021	1397021		1397011	1397012	Male	NA	NA	NA
673	MS111684||10_75883653_C_T	exome	NDD	ID;ID	10_75883653_C_T	10	75883653	C	T	26985	AP3M1	-	CDS			exonic	AP3M1	.	nonsynonymous SNV	AP3M1:NM_001320264:exon9:c.G1172A:p.R391H,AP3M1:NM_001320265:exon9:c.G1010A:p.R337H,AP3M1:NM_012095:exon9:c.G1172A:p.R391H,AP3M1:NM_207012:exon10:c.G1172A:p.R391H,AP3M1:NM_001320263:exon11:c.G1172A:p.R391H	D	P	P	D	D	M	T	D	T	T	T	D	27.3	0.935	0.999	Rauch2012;Heyne_2018	MS111684		;simplex			;male	NA	NA	NA
674	12011.s1||10_75911001_T_G	exome	control	control	10_75911001_T_G	10	75911001	T	G	132	ADK	+	5'UTR			UTR5	ADK	NM_006721:c.-36T>G;NM_001202450:c.-36T>G	.	.	.	.	.	.	.	.	.	.	.	.	.	.	.	.	.	Satterstrom2020	12011.s1	12011		5842	5874	Male	NA	NA	NA
675	12875.s1||10_7605397_G_A	exome	control	control	10_7605397_G_A	10	7605397	G	A	80760	ITIH5	-	intron			intronic	ITIH5	.	.	.	.	.	.	.	.	.	.	.	.	.	.	.	.	.	.	Satterstrom2020	12875.s1	12875		SSC06022	SSC06021	Female	NA	NA	NA
676	654||10_76602791_C_G	exome	NDD	ID	10_76602791_C_G	10	76602791	C	G	23522	KAT6B	+	CDS			exonic	KAT6B	.	stopgain	KAT6B:NM_001256468:exon3:c.C176G:p.S59X,KAT6B:NM_001256469:exon3:c.C176G:p.S59X,KAT6B:NM_012330:exon3:c.C176G:p.S59X	.	.	.	D	A	.	.	.	.	.	.	D	36	0.935	1	Heyne_2018	654		simplex			female	NA	NA	NA
677	Lelieveld_654||10_76602791_C_G	exome	NDD	ID	10_76602791_C_G	10	76602791	C	G	23522	KAT6B	+	CDS			exonic	KAT6B	.	stopgain	KAT6B:NM_001256468:exon3:c.C176G:p.S59X,KAT6B:NM_001256469:exon3:c.C176G:p.S59X,KAT6B:NM_012330:exon3:c.C176G:p.S59X	.	.	.	D	A	.	.	.	.	.	.	D	36	0.935	1	Lelieveld2016	Lelieveld_654						NA	NA	NA
678	NDAR_INVCK592EMP_wes1||10_76729751_A_G	exome	NDD	autism	10_76729751_A_G	10	76729751	A	G	23522	KAT6B	+	intron			intronic	KAT6B	.	.	.	.	.	.	.	.	.	.	.	.	.	.	.	.	.	.	De_Rubeis_2014	NDAR_INVCK592EMP_wes1	NDAR_INVCK592EMP_wes1		NDAR_INVZZ196LJ7_wes1	NDAR_INVHN053CP6_wes1	Male	NA	NA	NA
679	767||10_76732366_C_T	exome	NDD	ID	10_76732366_C_T	10	76732366	C	T	23522	KAT6B	+	CDS			exonic	KAT6B	.	stopgain	KAT6B:NM_001256468:exon7:c.C1030T:p.R344X,KAT6B:NM_001256469:exon7:c.C1030T:p.R344X,KAT6B:NM_012330:exon7:c.C1030T:p.R344X	.	.	.	N	A	.	.	.	.	.	.	D	40	0.852	1	Heyne_2018	767		simplex			female	NA	NA	NA
680	Lelieveld_767||10_76732366_C_T	exome	NDD	ID	10_76732366_C_T	10	76732366	C	T	23522	KAT6B	+	CDS			exonic	KAT6B	.	stopgain	KAT6B:NM_001256468:exon7:c.C1030T:p.R344X,KAT6B:NM_001256469:exon7:c.C1030T:p.R344X,KAT6B:NM_012330:exon7:c.C1030T:p.R344X	.	.	.	N	A	.	.	.	.	.	.	D	40	0.852	1	Lelieveld2016	Lelieveld_767						NA	NA	NA
681	253||10_76737197_T_A	exome	NDD	ID	10_76737197_T_A	10	76737197	T	A	23522	KAT6B	+	intron			splicing	KAT6B	NM_001256469:exon9:c.1239+2T>A;NM_001256468:exon9:c.1566+2T>A;NM_012330:exon9:c.2115+2T>A	.	.	.	.	.	.	D	.	.	.	.	.	.	D	25.7	1.011	0.996	Heyne_2018	253		simplex			male	NA	NA	NA
682	Lelieveld_253||10_76737197_T_A	exome	NDD	ID	10_76737197_T_A	10	76737197	T	A	23522	KAT6B	+	intron			splicing	KAT6B	NM_001256469:exon9:c.1239+2T>A;NM_001256468:exon9:c.1566+2T>A;NM_012330:exon9:c.2115+2T>A	.	.	.	.	.	.	D	.	.	.	.	.	.	D	25.7	1.011	0.996	Lelieveld2016	Lelieveld_253						NA	NA	NA
683	DDDP110624||10_76741660_C_T	exome	NDD	DD	10_76741660_C_T	10	76741660	C	T	23522	KAT6B	+	CDS			exonic	KAT6B	.	stopgain	KAT6B:NM_001256468:exon11:c.C1798T:p.R600X,KAT6B:NM_001256469:exon11:c.C1471T:p.R491X,KAT6B:NM_012330:exon11:c.C2347T:p.R783X	.	.	.	D	A	.	.	.	.	.	.	D	39	0.935	1	Heyne_2018	DDDP110624		simplex			female	NA	NA	NA
684	11665.p1||10_76781848_C_A	exome	NDD	autism	10_76781848_C_A	10	76781848	C	A	23522	KAT6B	+	CDS	Low_complexity	1	exonic	KAT6B	.	nonsynonymous SNV	KAT6B:NM_001256468:exon16:c.C2682A:p.D894E,KAT6B:NM_001256469:exon16:c.C2355A:p.D785E,KAT6B:NM_012330:exon16:c.C3231A:p.D1077E	T	B	B	N	N	N	T	N	T	T	D	N	0.001	-3.614	0.008	SSC_Iossifov_2014	11665.p1	11665		11665.fa	11665.mo	Male	NA	NA	NA
685	DDDP103951||10_76784714_A_G	exome	NDD	DD	10_76784714_A_G	10	76784714	A	G	23522	KAT6B	+	intron			splicing	KAT6B	NM_001256469:exon17:c.2497-2A>G;NM_001256468:exon17:c.2824-2A>G;NM_012330:exon17:c.3373-2A>G	.	.	.	.	.	.	D	.	.	.	.	.	.	D	24.6	1.088	1	Heyne_2018	DDDP103951		simplex			female	NA	NA	NA
686	DDDP114786||10_76788469_C_A	exome	NDD	DD	10_76788469_C_A	10	76788469	C	A	23522	KAT6B	+	CDS			exonic	KAT6B	.	stopgain	KAT6B:NM_001256468:exon18:c.C3338A:p.S1113X,KAT6B:NM_001256469:exon18:c.C3011A:p.S1004X,KAT6B:NM_012330:exon18:c.C3887A:p.S1296X	.	.	.	N	D	.	.	.	.	.	.	N	36	0.935	0.928	Heyne_2018	DDDP114786		simplex			female	NA	NA	NA
687	DDDP102051||10_76789597_G_C	exome	NDD	DD	10_76789597_G_C	10	76789597	G	C	23522	KAT6B	+	CDS			exonic	KAT6B	.	nonsynonymous SNV	KAT6B:NM_001256468:exon18:c.G4466C:p.S1489T,KAT6B:NM_001256469:exon18:c.G4139C:p.S1380T,KAT6B:NM_012330:exon18:c.G5015C:p.S1672T	D	D	D	D	D	N	D	N	D	D	D	D	25.6	1.048	0.999	Heyne_2018	DDDP102051		simplex			female	NA	NA	NA
688	DDDP101100||10_76789623_G_A	exome	NDD	DD	10_76789623_G_A	10	76789623	G	A	23522	KAT6B	+	CDS			exonic	KAT6B	.	nonsynonymous SNV	KAT6B:NM_001256468:exon18:c.G4492A:p.E1498K,KAT6B:NM_001256469:exon18:c.G4165A:p.E1389K,KAT6B:NM_012330:exon18:c.G5041A:p.E1681K	D	D	D	D	D	N	D	D	D	D	D	D	32	1.048	0.997	Heyne_2018	DDDP101100		simplex			female	NA	NA	NA
689	DDDP111992||10_76789971_C_T	exome	NDD	DD	10_76789971_C_T	10	76789971	C	T	23522	KAT6B	+	CDS			exonic	KAT6B	.	stopgain	KAT6B:NM_001256468:exon18:c.C4840T:p.R1614X,KAT6B:NM_001256469:exon18:c.C4513T:p.R1505X,KAT6B:NM_012330:exon18:c.C5389T:p.R1797X	.	.	.	D	D	.	.	.	.	.	.	D	44	0.935	0.978	Heyne_2018	DDDP111992		simplex			male	NA	NA	NA
690	11C123213||10_76928328_T_C	exome	control	control	10_76928328_T_C	10	76928328	T	C	142891	SAMD8	+	CDS			exonic	SAMD8	.	nonsynonymous SNV	SAMD8:NM_001174156:exon4:c.T704C:p.L235P,SAMD8:NM_144660:exon4:c.T704C:p.L235P	D	D	D	D	D	M	D	D	D	D	D	D	29	1.061	1	Satterstrom2020	11C123213	11C123213		11C123211	11C123212	Male	NA	NA	NA
691	20-001813-17||10_76936007_A_G	exome	NDD	autism	10_76936007_A_G	10	76936007	A	G	142891	SAMD8	+	CDS			exonic	SAMD8	.	nonsynonymous SNV	SAMD8:NM_144660:exon5:c.A976G:p.R326G	D	B	B	.	N	.	.	N	T	T	T	N	3.094	1.184	0.022	Satterstrom2020	20-001813-17	20-001813-17		20-001811-12	20-001812-11	Female	NA	NA	NA
692	14356.p1||10_76970888_G_A	exome	NDD	autism	10_76970888_G_A	10	76970888	G	A	7417	VDAC2	+	intron			intronic	VDAC2	.	.	.	.	.	.	.	.	.	.	.	.	.	.	.	.	.	.	Krumm;Satterstrom2020	14356.p1	;14356		;SSC11612	;SSC11610	;Male	NA	NA	NA
693	NDAR_INVLT348DHD_wes1||10_76970931_A_G	exome	NDD	autism	10_76970931_A_G	10	76970931	A	G	7417	VDAC2	+	CDS||5'UTR			exonic	VDAC2	.	synonymous SNV	VDAC2:NM_001184823:exon2:c.A15G:p.G5G,VDAC2:NM_001324088:exon3:c.A15G:p.G5G,VDAC2:NM_003375:exon3:c.A15G:p.G5G	.	.	.	.	.	.	.	.	.	.	.	.	.	.	.	DeRubeis2014;De_Rubeis_2014	NDAR_INVLT348DHD_wes1	;NDAR_INVLT348DHD_wes1		;NDAR_INVKK744HTZ_wes1	;NDAR_INVVH639HTW_wes1	;Male	NA	NA	NA
694	11910.p1||10_7748800_G_A	exome	NDD	autism	10_7748800_G_A	10	7748800	G	A	3698	ITIH2	+	intron			intronic	ITIH2	.	.	.	.	.	.	.	.	.	.	.	.	.	.	.	.	.	.	Iossifov	11910.p1						NA	NA	NA
695	08C74467||10_78669774_C_G	exome	NDD	autism	10_78669774_C_G	10	78669774	C	G	3778	KCNMA1	-	CDS			exonic	KCNMA1	.	nonsynonymous SNV	KCNMA1:NM_001271518:exon24:c.G2773C:p.A925P,KCNMA1:NM_001322832:exon24:c.G2923C:p.A975P,KCNMA1:NM_002247:exon24:c.G2923C:p.A975P,KCNMA1:NM_001014797:exon25:c.G2935C:p.A979P,KCNMA1:NM_001161352:exon25:c.G3097C:p.A1033P,KCNMA1:NM_001161353:exon25:c.G3046C:p.A1016P,KCNMA1:NM_001322829:exon25:c.G2932C:p.A978P,KCNMA1:NM_001322836:exon25:c.G2932C:p.A978P,KCNMA1:NM_001271519:exon26:c.G3013C:p.A1005P,KCN…	D	D	D	D	D	M	T	D	T	T	D	D	34	0.935	0.995	Satterstrom2020	08C74467	08C74467		08C74469	08C74468	Male	NA	NA	NA
696	13008.p1||10_78761230_G_T	exome	NDD	autism	10_78761230_G_T	10	78761230	G	T	3778	KCNMA1	-	CDS			exonic	KCNMA1	.	nonsynonymous SNV	KCNMA1:NM_001161352:exon19:c.C2201A:p.T734N	T	B	B	.	D	N	D	N	T	T	T	D	14.52	1.048	1	Krumm;Satterstrom2020	13008.p1	;13008		;4943	;4975	;Male	NA	NA	NA
697	DDDP119649||10_78799338_T_C	exome	NDD	DD	10_78799338_T_C	10	78799338	T	C	3778	KCNMA1	-	CDS			exonic	KCNMA1	.	nonsynonymous SNV	KCNMA1:NM_001271518:exon14:c.A1645G:p.T549A,KCNMA1:NM_001014797:exon15:c.A1807G:p.T603A,KCNMA1:NM_001161352:exon15:c.A1807G:p.T603A,KCNMA1:NM_001161353:exon15:c.A1807G:p.T603A,KCNMA1:NM_001271519:exon15:c.A1807G:p.T603A,KCNMA1:NM_001322829:exon15:c.A1807G:p.T603A,KCNMA1:NM_001322830:exon15:c.A1807G:p.T603A,KCNMA1:NM_001322832:exon15:c.A1807G:p.T603A,KCNMA1:NM_001322835:exon15:c.A1807G:p.T603A,KCN…	T	D	D	D	D	M	T	D	T	T	D	D	23.6	1.011	1	Heyne_2018	DDDP119649		simplex			female	NA	NA	NA
698	20-0517250-22||10_78832998_T_G	exome	NDD	autism	10_78832998_T_G	10	78832998	T	G	3778	KCNMA1	-	CDS			exonic	KCNMA1	.	nonsynonymous SNV	KCNMA1:NM_001271518:exon13:c.A1444C:p.N482H,KCNMA1:NM_001014797:exon14:c.A1606C:p.N536H,KCNMA1:NM_001161352:exon14:c.A1606C:p.N536H,KCNMA1:NM_001161353:exon14:c.A1606C:p.N536H,KCNMA1:NM_001271519:exon14:c.A1606C:p.N536H,KCNMA1:NM_001322829:exon14:c.A1606C:p.N536H,KCNMA1:NM_001322830:exon14:c.A1606C:p.N536H,KCNMA1:NM_001322832:exon14:c.A1606C:p.N536H,KCNMA1:NM_001322835:exon14:c.A1606C:p.N536H,KCN…	D	D	D	D	D	M	T	D	T	T	D	D	25.7	1.061	0.997	Satterstrom2020	20-0517250-22	20-0517250-22		20-0517249-21	20-0517248-19	Female	NA	NA	NA
699	DDDP102811||10_78869939_C_T	exome	NDD	DD	10_78869939_C_T	10	78869939	C	T	3778	KCNMA1	-	CDS			exonic	KCNMA1	.	nonsynonymous SNV	KCNMA1:NM_001271518:exon7:c.G961A:p.G321R,KCNMA1:NM_001014797:exon8:c.G1123A:p.G375R,KCNMA1:NM_001161352:exon8:c.G1123A:p.G375R,KCNMA1:NM_001161353:exon8:c.G1123A:p.G375R,KCNMA1:NM_001271519:exon8:c.G1123A:p.G375R,KCNMA1:NM_001322829:exon8:c.G1123A:p.G375R,KCNMA1:NM_001322830:exon8:c.G1123A:p.G375R,KCNMA1:NM_001322832:exon8:c.G1123A:p.G375R,KCNMA1:NM_001322835:exon8:c.G1123A:p.G375R,KCNMA1:NM_001…	D	D	D	N	D	M	D	D	T	T	D	D	34	0.927	1	Heyne_2018	DDDP102811		simplex			female	NA	NA	NA
700	10C105879||10_78869948_A_C	exome	NDD	autism	10_78869948_A_C	10	78869948	A	C	3778	KCNMA1	-	CDS			exonic	KCNMA1	.	nonsynonymous SNV	KCNMA1:NM_001271518:exon7:c.T952G:p.F318V,KCNMA1:NM_001014797:exon8:c.T1114G:p.F372V,KCNMA1:NM_001161352:exon8:c.T1114G:p.F372V,KCNMA1:NM_001161353:exon8:c.T1114G:p.F372V,KCNMA1:NM_001271519:exon8:c.T1114G:p.F372V,KCNMA1:NM_001322829:exon8:c.T1114G:p.F372V,KCNMA1:NM_001322830:exon8:c.T1114G:p.F372V,KCNMA1:NM_001322832:exon8:c.T1114G:p.F372V,KCNMA1:NM_001322835:exon8:c.T1114G:p.F372V,KCNMA1:NM_001…	D	D	D	D	D	L	D	D	T	T	D	D	29.8	1.187	1	DeRubeis2014;Satterstrom2020	10C105879	;10C105879		;10C105880	;10C105881	;Female	NA	NA	NA
701	1255JS0019|200675470@1082034721||10_78943225_C_T	exome	NDD	autism	10_78943225_C_T	10	78943225	C	T	3778	KCNMA1	-	CDS||5'UTR			exonic	KCNMA1	.	synonymous SNV	KCNMA1:NM_001271518:exon4:c.G600A:p.T200T,KCNMA1:NM_001014797:exon5:c.G762A:p.T254T,KCNMA1:NM_001161352:exon5:c.G762A:p.T254T,KCNMA1:NM_001161353:exon5:c.G762A:p.T254T,KCNMA1:NM_001271519:exon5:c.G762A:p.T254T,KCNMA1:NM_001322829:exon5:c.G762A:p.T254T,KCNMA1:NM_001322830:exon5:c.G762A:p.T254T,KCNMA1:NM_001322832:exon5:c.G762A:p.T254T,KCNMA1:NM_001322835:exon5:c.G762A:p.T254T,KCNMA1:NM_001322836:e…	.	.	.	.	.	.	.	.	.	.	.	.	.	.	.	DeRubeis2014;ASC_Neale2012;Satterstrom2020	1255JS0019|200675470@1082034721	;1255JS0019;200675470@1082034721		;1255JS0020;200675468@1082034738	;1255JS0021;200675469@1082034243	;Female	NA	NA	NA
702	DEASD_0022_001||10_79569329_G_A	exome	NDD	autism	10_79569329_G_A	10	79569329	G	A	9231	DLG5	-	CDS			exonic	DLG5	.	synonymous SNV	DLG5:NM_004747:exon24:c.C4623T:p.L1541L	.	.	.	.	.	.	.	.	.	.	.	.	.	.	.	DeRubeis2014;Satterstrom2020	DEASD_0022_001	;DEASD_0022_001		;DEASD_0022_500	;DEASD_0022_600	;Male	NA	NA	NA
703	DDDP104891||10_79576321_C_T	exome	NDD	DD	10_79576321_C_T	10	79576321	C	T	9231	DLG5	-	CDS			exonic	DLG5	.	nonsynonymous SNV	DLG5:NM_004747:exon20:c.G4013A:p.R1338Q	T	P	B	N	D	L	T	N	T	T	T	D	24.4	0.935	0.99	Heyne_2018	DDDP104891		simplex			female	NA	NA	NA
704	C1028-03||10_79581699_T_C	exome	NDD	tourette_syndrome	10_79581699_T_C	10	79581699	T	C	9231	DLG5	-	CDS			exonic	DLG5	.	nonsynonymous SNV	DLG5:NM_004747:exon15:c.A2543G:p.Y848C	T	B	B	N	N	N	T	N	T	T	T	N	0.001	-0.269	0.047	Willsey2017	C1028-03						NA	NA	NA
705	DDDP100618||10_79737301_G_A	exome	NDD	DD	10_79737301_G_A	10	79737301	G	A	11128	POLR3A	-	CDS			exonic	POLR3A	.	nonsynonymous SNV	POLR3A:NM_007055:exon31:c.C4108T:p.P1370S	T	B	B	D	D	N	T	N	T	T	T	D	7.055	1.045	0.294	Heyne_2018	DDDP100618		simplex			female	NA	NA	NA
706	NDAR_INVEB022VLQ_wes1||10_79742384_C_T	exome	NDD	autism	10_79742384_C_T	10	79742384	C	T	11128	POLR3A	-	intron			intronic	POLR3A	.	.	.	.	.	.	.	.	.	.	.	.	.	.	.	.	.	.	De_Rubeis_2014	NDAR_INVEB022VLQ_wes1	NDAR_INVEB022VLQ_wes1		NDAR_INVEC104TNP_wes1	NDAR_INVLC815XZU_wes1	Male	NA	NA	NA
707	157||10_79764590_T_A	exome	NDD	ID	10_79764590_T_A	10	79764590	T	A	11128	POLR3A	-	CDS			exonic	POLR3A	.	stopgain	POLR3A:NM_007055:exon16:c.A2131T:p.K711X	.	.	.	D	A	.	.	.	.	.	.	D	39	1.061	0.624	Heyne_2018	Heyne_2018.157		simplex			male	NA	NA	NA
708	Lelieveld_157||10_79764590_T_A	exome	NDD	ID	10_79764590_T_A	10	79764590	T	A	11128	POLR3A	-	CDS			exonic	POLR3A	.	stopgain	POLR3A:NM_007055:exon16:c.A2131T:p.K711X	.	.	.	D	A	.	.	.	.	.	.	D	39	1.061	0.624	Lelieveld2016	Lelieveld_157						NA	NA	NA
709	08C76146||10_79789071_G_A	exome	NDD	autism	10_79789071_G_A	10	79789071	G	A	11128	POLR3A	-	intron			intronic	POLR3A	.	.	.	.	.	.	.	.	.	.	.	.	.	.	.	.	.	.	Satterstrom2020	08C76146	08C76146		08C76148	08C76147	Male	NA	NA	NA
710	278|Lelieveld_278||10_81052055_C_T	exome	NDD	ID;ID	10_81052055_C_T	10	81052055	C	T	57178	ZMIZ1	+	CDS			exonic	ZMIZ1	.	nonsynonymous SNV	ZMIZ1:NM_020338:exon11:c.C899T:p.T300M	D	D	D	U	D	M	T	D	T	T	D	D	26.9	0.934	0.994	Heyne_2018;Lelieveld2016	278|Lelieveld_278		simplex;			male;	NA	NA	NA
711	13438.s1||10_81058925_G_A	exome	control	control	10_81058925_G_A	10	81058925	G	A	57178	ZMIZ1	+	CDS			exonic	ZMIZ1	.	synonymous SNV	ZMIZ1:NM_020338:exon16:c.G1785A:p.T595T	.	.	.	.	.	.	.	.	.	.	.	.	.	.	.	Iossifov;Satterstrom2020	13438.s1	;13438		;13438.fa	;13438.mo	;Male	NA	NA	NA
712	11090.p1||10_81066040_G_A	exome	NDD	autism;ASD	10_81066040_G_A	10	81066040	G	A	57178	ZMIZ1	+	CDS			exonic	ZMIZ1	.	synonymous SNV	ZMIZ1:NM_020338:exon22:c.G2607A:p.P869P	.	.	.	.	.	.	.	.	.	.	.	.	.	.	.	Iossifov;Heyne_2018;Satterstrom2020	11090.p1	;11090	;simplex	;SSC02885	;SSC02896	;male;Male	NA	NA	NA
713	5G257||10_81072363_C_T	exome	NDD	autism	10_81072363_C_T	10	81072363	C	T	57178	ZMIZ1	+	intron			intronic	ZMIZ1	.	.	.	.	.	.	.	.	.	.	.	.	.	.	.	.	.	.	Satterstrom2020	5G257	5G257		5G259	5G258	Male	NA	NA	NA
714	08C74853||10_81072514_C_T	exome	NDD	autism	10_81072514_C_T	10	81072514	C	T	57178	ZMIZ1	+	3'UTR			UTR3	ZMIZ1	NM_020338:c.*8C>T	.	.	.	.	.	.	.	.	.	.	.	.	.	.	.	.	.	Satterstrom2020	08C74853	08C74853		08C74850	08C74851	Male	NA	NA	NA
715	13614.s1||10_81146112_G_A	exome	control	control	10_81146112_G_A	10	81146112	G	A	219654	ZCCHC24	-	CDS			exonic	ZCCHC24	.	nonsynonymous SNV	ZCCHC24:NM_153367:exon4:c.C715T:p.R239C	D	D	D	D	D	M	T	D	T	T	D	D	35	1.048	0.911	Iossifov;Satterstrom2020	13614.s1	;13614		;13614.fa	;13614.mo	;Female	NA	NA	NA
716	439|Lelieveld_439||10_8115881_C_T	exome	NDD	ID;ID	10_8115881_C_T	10	8115881	C	T	2625	GATA3	+	CDS			exonic	GATA3	.	synonymous SNV	GATA3:NM_001002295:exon6:c.C1230T:p.F410F,GATA3:NM_002051:exon6:c.C1227T:p.F409F	.	.	.	.	.	.	.	.	.	.	.	.	.	.	.	Heyne_2018;Lelieveld2016	439|Lelieveld_439		simplex;			male;	NA	NA	NA
717	11843.p1||10_8115888_T_C	exome	NDD	autism	10_8115888_T_C	10	8115888	T	C	2625	GATA3	+	CDS			exonic	GATA3	.	nonsynonymous SNV	GATA3:NM_001002295:exon6:c.T1237C:p.S413P,GATA3:NM_002051:exon6:c.T1234C:p.S412P	T	B	B	D	D	L	D	N	D	D	D	D	23.4	0.964	1	Satterstrom2020	11843.p1	11843		5248	5280	Female	NA	NA	NA
718	388-05-103530||10_81317211_A_G	exome	NDD	autism	10_81317211_A_G	10	81317211	A	G	729238	SFTPA2	-	CDS			exonic	SFTPA2	.	synonymous SNV	SFTPA2:NM_001320814:exon5:c.T531C:p.N177N,SFTPA2:NM_001098668:exon6:c.T501C:p.N167N,SFTPA2:NM_001320813:exon6:c.T501C:p.N167N	.	.	.	.	.	.	.	.	.	.	.	.	.	.	.	Satterstrom2020	388-05-103530	388-05-103530		321-05-103991	385-05-103534	Female	NA	NA	NA
719	10C106784||10_81702258_G_A	exome	NDD	autism	10_81702258_G_A	10	81702258	G	A	6441	SFTPD	-	CDS			exonic	SFTPD	.	nonsynonymous SNV	SFTPD:NM_003019:exon4:c.C319T:p.P107S	T	P	B	N	D	L	D	N	D	D	D	D	23.4	1.027	0.964	Satterstrom2020	10C106784	10C106784		10C106786	10C106785	Male	NA	NA	NA
720	EGAN00001100985||10_81841931_A_G	exome	NDD	autism	10_81841931_A_G	10	81841931	A	G	80195	C10orf57	+	CDS||3'UTR			exonic	TMEM254	.	synonymous SNV	TMEM254:NM_001270367:exon3:c.A294G:p.G98G,TMEM254:NM_001270368:exon3:c.A294G:p.G98G,TMEM254:NM_001270369:exon3:c.A294G:p.G98G,TMEM254:NM_001270370:exon3:c.A222G:p.G74G,TMEM254:NM_001270372:exon3:c.A222G:p.G74G,TMEM254:NM_001270373:exon3:c.A222G:p.G74G,TMEM254:NM_025125:exon3:c.A222G:p.G74G	.	.	.	.	.	.	.	.	.	.	.	.	.	.	.	Satterstrom2020	EGAN00001100985	EGAN00001100985		EGAN00001101286	EGAN00001101293	Male	NA	NA	NA
721	12568.p1||10_81850622_G_A	exome	NDD	ASD;autism	10_81850622_G_A	10	81850622	G	A	80195	C10orf57	+	CDS||3'UTR			exonic	TMEM254	.	synonymous SNV	TMEM254:NM_001270367:exon4:c.G393A:p.A131A,TMEM254:NM_025125:exon4:c.G321A:p.A107A	.	.	.	.	.	.	.	.	.	.	.	.	.	.	.	Heyne_2018;Satterstrom2020	12568.p1	;12568	simplex;	;12568.fa	;12568.mo	male;Male	NA	NA	NA
722	14609.s1||10_81923205_T_C	exome	control	control	10_81923205_T_C	10	81923205	T	C	311	ANXA11	-	intron			intronic	ANXA11	.	.	.	.	.	.	.	.	.	.	.	.	.	.	.	.	.	.	Satterstrom2020	14609.s1	14609		36993	36995	Female	NA	NA	NA
723	07E0967||10_82036154_C_T	exome	NDD	ID;ID	10_82036154_C_T	10	82036154	C	T	4143	MAT1A	-	CDS			exonic	MAT1A	.	nonsynonymous SNV	MAT1A:NM_000429:exon6:c.G746A:p.R249Q	T	B	B	D	D	L	D	N	T	D	D	D	27.6	0.935	0.997	Rauch2012;Heyne_2018	07E0967		;simplex			;male	NA	NA	NA
724	14348.p1||10_82043656_G_A	exome	NDD	autism	10_82043656_G_A	10	82043656	G	A	4143	MAT1A	-	intron			intronic	MAT1A	.	.	.	.	.	.	.	.	.	.	.	.	.	.	.	.	.	.	Iossifov;Satterstrom2020	14348.p1	;14348		;SSC11447	;SSC11442	;Male	NA	NA	NA
725	11939.p1||10_82112184_A_C	exome	NDD	autism	10_82112184_A_C	10	82112184	A	C	84332	DYDC2	+	intron			intronic	DYDC1;DYDC2	.	.	.	.	.	.	.	.	.	.	.	.	.	.	.	.	.	.	Satterstrom2020	11939.p1	11939		11939.fa	11939.mo	Male	NA	NA	NA
726	86708128||10_82180235_C_T	exome	NDD	tourette_syndrome	10_82180235_C_T	10	82180235	C	T	84293	FAM213A	+	CDS			exonic	FAM213A	.	synonymous SNV	FAM213A:NM_001243778:exon2:c.C12T:p.L4L,FAM213A:NM_001243779:exon2:c.C12T:p.L4L,FAM213A:NM_001243780:exon2:c.C12T:p.L4L,FAM213A:NM_032333:exon2:c.C12T:p.L4L	.	.	.	.	.	.	.	.	.	.	.	.	.	.	.	Willsey2017	86708128						NA	NA	NA
727	08C74889||10_82330067_G_A	exome	NDD	autism	10_82330067_G_A	10	82330067	G	A	387694	SH2D4B	+	CDS			exonic	SH2D4B	.	synonymous SNV	SH2D4B:NM_001145719:exon2:c.G195A:p.E65E,SH2D4B:NM_207372:exon2:c.G342A:p.E114E	.	.	.	.	.	.	.	.	.	.	.	.	.	.	.	Satterstrom2020	08C74889	08C74889		08C74891	08C74890	Male	NA	NA	NA
728	DDDP109788||10_85962785_C_T	exome	NDD	DD	10_85962785_C_T	10	85962785	C	T	92211	CDHR1	+	CDS||5'UTR			exonic	CDHR1	.	nonsynonymous SNV	CDHR1:NM_001171971:exon8:c.C689T:p.T230I,CDHR1:NM_033100:exon8:c.C689T:p.T230I	D	P	P	D	D	L	T	D	T	T	D	D	23.3	-0.004	0.89	Heyne_2018	DDDP109788		simplex			female	NA	NA	NA
729	152716||10_85973999_G_A	exome	NDD	autism	10_85973999_G_A	10	85973999	G	A	92211	CDHR1	+	CDS			exonic	CDHR1	.	synonymous SNV	CDHR1:NM_033100:exon17:c.G2202A:p.L734L	.	.	.	.	.	.	.	.	.	.	.	.	.	.	.	Satterstrom2020	152716	152716		152714	152715	Male	NA	NA	NA
730	059-09-110844||10_85982330_A_G	exome	control	control	10_85982330_A_G	10	85982330	A	G	340745	LRIT2	-	CDS			exonic	LRIT2	.	synonymous SNV	LRIT2:NM_001017924:exon3:c.T999C:p.I333I,LRIT2:NM_001284223:exon4:c.T1029C:p.I343I	.	.	.	.	.	.	.	.	.	.	.	.	.	.	.	Satterstrom2020	059-09-110844	059-09-110844		057-09-110837	056-09-110836	Female	NA	NA	NA
731	11013.s1||10_86131994_G_A	exome	control	control	10_86131994_G_A	10	86131994	G	A	54462	FAM190B	+	CDS			exonic	CCSER2	.	nonsynonymous SNV	CCSER2:NM_001284240:exon2:c.G1186A:p.D396N,CCSER2:NM_001284241:exon2:c.G1186A:p.D396N,CCSER2:NM_001351290:exon2:c.G1186A:p.D396N,CCSER2:NM_001351292:exon2:c.G1186A:p.D396N,CCSER2:NM_018999:exon2:c.G1186A:p.D396N	D	D	P	D	D	M	T	N	T	T	T	D	23.6	1.029	1	Iossifov	11013.s1						NA	NA	NA
732	DDDP115382||10_871004_C_T	exome	NDD	DD	10_871004_C_T	10	871004	C	T	23185	LARP4B	-	intron			splicing	LARP4B	NM_015155:exon13:c.1484+1G>A;NM_001351277:exon13:c.1484+1G>A	.	.	.	.	.	.	D	.	.	.	.	.	.	D	24.6	0.935	0.992	Heyne_2018	DDDP115382		simplex			male	NA	NA	NA
733	14635.s1||10_871029_G_T	exome	control	control	10_871029_G_T	10	871029	G	T	23185	LARP4B	-	CDS			exonic	LARP4B	.	nonsynonymous SNV	LARP4B:NM_001351277:exon13:c.C1460A:p.S487Y,LARP4B:NM_015155:exon13:c.C1460A:p.S487Y	T	B	B	D	D	L	T	N	T	T	T	D	0.109	1.048	0.05	Satterstrom2020	14635.s1	14635		37056	37058	Female	NA	NA	NA
734	DDDP112650||10_87487809_C_G	exome	NDD	DD	10_87487809_C_G	10	87487809	C	G	2894	GRID1	-	CDS			exonic	GRID1	.	nonsynonymous SNV	GRID1:NM_017551:exon10:c.G1336C:p.E446Q	D	D	P	D	D	L	T	N	T	T	.	D	25.1	0.935	0.991	Heyne_2018	DDDP112650		simplex			female	NA	NA	NA
735	G01-GEA-268-HI||10_88476458_G_A	exome	NDD	autism	10_88476458_G_A	10	88476458	G	A	11155	LDB3	+	CDS			exonic	LDB3	.	nonsynonymous SNV	LDB3:NM_001080114:exon9:c.G1276A:p.V426I,LDB3:NM_007078:exon9:c.G1606A:p.V536I,LDB3:NM_001171610:exon10:c.G1621A:p.V541I	T	B	B	N	N	N	T	N	T	T	T	D	14.46	-0.299	0.732	Satterstrom2020	G01-GEA-268-HI	G01-GEA-268-HI		G01-GEA-268-PA	G01-GEA-268-MA	Female	NA	NA	NA
736	13926.s1||10_88478538_G_T	exome	control	control	10_88478538_G_T	10	88478538	G	T	11155	LDB3	+	CDS			exonic	LDB3	.	nonsynonymous SNV	LDB3:NM_001080114:exon11:c.G1582T:p.A528S,LDB3:NM_007078:exon11:c.G1912T:p.A638S,LDB3:NM_001171610:exon12:c.G1927T:p.A643S	D	D	P	N	D	N	D	N	D	D	D	D	29.4	1.048	0.941	Iossifov	13926.s1						NA	NA	NA
737	11291.p1||10_88676994_T_G	exome	NDD	autism	10_88676994_T_G	10	88676994	T	G	657	BMPR1A	+	CDS			exonic	BMPR1A	.	nonsynonymous SNV	BMPR1A:NM_004329:exon9:c.T779G:p.V260G	D	D	D	D	D	H	D	D	D	D	D	D	26.2	1.061	0.221	Satterstrom2020	11291.p1	11291		5275	5307	Male	NA	NA	NA
738	14421.s1||10_88678971_A_G	exome	control	control	10_88678971_A_G	10	88678971	A	G	657	BMPR1A	+	CDS			exonic	BMPR1A	.	nonsynonymous SNV	BMPR1A:NM_004329:exon10:c.A911G:p.Q304R	D	B	B	D	D	N	T	D	T	T	D	D	25.5	1.028	1	Krumm	14421.s1						NA	NA	NA
739	13039.p1||10_88683298_G_A	exome	NDD	autism	10_88683298_G_A	10	88683298	G	A	657	BMPR1A	+	intron			intronic	BMPR1A	.	.	.	.	.	.	.	.	.	.	.	.	.	.	.	.	.	.	Satterstrom2020	13039.p1	13039		SSC06490	SSC06480	Male	NA	NA	NA
740	09C98975||10_88703271_C_T	exome	NDD	autism	10_88703271_C_T	10	88703271	C	T	79812	MMRN2	-	CDS			exonic	MMRN2	.	nonsynonymous SNV	MMRN2:NM_024756:exon6:c.G1270A:p.D424N	D	D	B	N	N	M	T	N	T	T	D	N	25.4	0.935	0.862	DeRubeis2014;Satterstrom2020	09C98975	;09C98975		;10C102068	;09C98976	;Female	NA	NA	NA
741	681-05-104609||10_88722482_C_A	exome	control	control	10_88722482_C_A	10	88722482	C	A	6623	SNCG	+	intron			intronic	SNCG	.	.	.	.	.	.	.	.	.	.	.	.	.	.	.	.	.	.	Satterstrom2020	681-05-104609	681-05-104609		680-05-104607	679-05-104604	Female	NA	NA	NA
742	09C90420||10_88728251_A_G	exome	NDD	autism	10_88728251_A_G	10	88728251	A	G	10974	C10orf116	+	5'UTR			UTR5	ADIRF	NM_006829:c.-51A>G	.	.	.	.	.	.	.	.	.	.	.	.	.	.	.	.	.	Satterstrom2020	09C90420	09C90420		09C90421	09C90422	Male	NA	NA	NA
743	09C80979||10_88817407_G_C	exome	NDD	autism	10_88817407_G_C	10	88817407	G	C	2746	GLUD1	-	intron			intronic	GLUD1	.	.	.	.	.	.	.	.	.	.	.	.	.	.	.	.	.	.	Satterstrom2020	09C80979	09C80979		09C80978	09C80977	Male	NA	NA	NA
744	DDDP113546||10_88817449_G_A	exome	NDD	DD	10_88817449_G_A	10	88817449	G	A	2746	GLUD1	-	CDS			exonic	GLUD1	.	nonsynonymous SNV	GLUD1:NM_001318900:exon11:c.C1094T:p.S365L,GLUD1:NM_005271:exon11:c.C1493T:p.S498L,GLUD1:NM_001318904:exon12:c.C992T:p.S331L,GLUD1:NM_001318906:exon12:c.C992T:p.S331L,GLUD1:NM_001318902:exon13:c.C992T:p.S331L,GLUD1:NM_001318901:exon14:c.C992T:p.S331L,GLUD1:NM_001318905:exon14:c.C992T:p.S331L	T	P	B	N	A	L	D	D	D	D	D	D	23.7	0.993	1	Heyne_2018	DDDP113546		simplex			female	NA	NA	NA
745	DEASD_0355_001||10_88819023_T_C	exome	NDD	autism	10_88819023_T_C	10	88819023	T	C	2746	GLUD1	-	CDS			exonic	GLUD1	.	nonsynonymous SNV	GLUD1:NM_001318900:exon10:c.A887G:p.Y296C,GLUD1:NM_005271:exon10:c.A1286G:p.Y429C,GLUD1:NM_001318904:exon11:c.A785G:p.Y262C,GLUD1:NM_001318906:exon11:c.A785G:p.Y262C,GLUD1:NM_001318902:exon12:c.A785G:p.Y262C,GLUD1:NM_001318901:exon13:c.A785G:p.Y262C,GLUD1:NM_001318905:exon13:c.A785G:p.Y262C	D	D	D	D	D	H	D	D	D	D	D	D	27.5	1.059	1	DeRubeis2014;Satterstrom2020	DEASD_0355_001	;DEASD_0355_001		;DEASD_0355_500	;DEASD_0355_600	;Male	NA	NA	NA
746	DEASD_0356_001||10_88835687_C_A	exome	NDD	autism	10_88835687_C_A	10	88835687	C	A	2746	GLUD1	-	intron	SINE	1	intronic	GLUD1	.	.	.	.	.	.	.	.	.	.	.	.	.	.	.	.	.	.	Satterstrom2020	DEASD_0356_001	DEASD_0356_001		DEASD_0356_500	DEASD_0356_600	Male	NA	NA	NA
747	DDDP111696||10_890987_C_A	exome	NDD	DD	10_890987_C_A	10	890987	C	A	23185	LARP4B	-	CDS			exonic	LARP4B	.	stopgain	LARP4B:NM_001351277:exon6:c.G439T:p.E147X,LARP4B:NM_015155:exon6:c.G439T:p.E147X	.	.	.	D	A	.	.	.	.	.	.	D	41	0.935	1	Heyne_2018	DDDP111696		simplex			male	NA	NA	NA
748	DDDP108897||10_89469058_G_A	exome	NDD	DD	10_89469058_G_A	10	89469058	G	A	9060	PAPSS2	+	CDS			exonic	PAPSS2	.	nonsynonymous SNV	PAPSS2:NM_001015880:exon2:c.G133A:p.V45M,PAPSS2:NM_004670:exon2:c.G133A:p.V45M	D	D	D	D	D	M	T	N	D	D	D	D	31	1.048	0.998	Heyne_2018	DDDP108897		simplex			female	NA	NA	NA
749	AC02-1124-01||10_89504934_G_T	exome	NDD	autism	10_89504934_G_T	10	89504934	G	T	9060	PAPSS2	+	CDS			exonic	PAPSS2	.	nonsynonymous SNV	PAPSS2:NM_004670:exon11:c.G1652T:p.R551L,PAPSS2:NM_001015880:exon12:c.G1667T:p.R556L	D	B	B	D	D	M	T	D	T	T	D	D	26.4	1.048	1	DeRubeis2014;De_Rubeis_2014	AC02-1124-01	;AC02-1124-01		;AC02-1124-02	;AC02-1124-03	;Male	NA	NA	NA
750	3345-1||10_89504941_T_C	exome	NDD	schizophrenia	10_89504941_T_C	10	89504941	T	C	9060	PAPSS2	+	CDS			exonic	PAPSS2	.	synonymous SNV	PAPSS2:NM_004670:exon11:c.T1659C:p.A553A,PAPSS2:NM_001015880:exon12:c.T1674C:p.A558A	.	.	.	.	.	.	.	.	.	.	.	.	.	.	.	Fromer2014	3345-1						NA	NA	NA
751	2K890||10_89552378_T_C	exome	NDD	autism	10_89552378_T_C	10	89552378	T	C	84896	ATAD1	-	intron			intronic	ATAD1	.	.	.	.	.	.	.	.	.	.	.	.	.	.	.	.	.	.	Satterstrom2020	2K890	2K890		3K084	3K083	Male	NA	NA	NA
752	F10129-4||10_89552405_G_A	exome	NDD	autism	10_89552405_G_A	10	89552405	G	A	84896	ATAD1	-	intron			intronic	ATAD1	.	.	.	.	.	.	.	.	.	.	.	.	.	.	.	.	.	.	Satterstrom2020	F10129-4	F10129-4		F10129-3	F10129-2	Male	NA	NA	NA
753	10C109936||10_89552422_T_C	exome	NDD	autism	10_89552422_T_C	10	89552422	T	C	84896	ATAD1	-	CDS			exonic	ATAD1	.	nonsynonymous SNV	ATAD1:NM_001321967:exon3:c.A253G:p.N85D,ATAD1:NM_001321968:exon3:c.A253G:p.N85D,ATAD1:NM_032810:exon3:c.A253G:p.N85D	T	B	B	D	D	N	D	N	T	D	D	D	10.88	1.061	0.996	DeRubeis2014;Satterstrom2020	10C109936	;10C109936		;10C109935	;10C109934	;Male	NA	NA	NA
754	1264011||10_89624245_G_T	exome	NDD	autism	10_89624245_G_T	10	89624245	G	T	5728	PTEN	+	CDS			exonic	PTEN	.	stopgain	PTEN:NM_000314:exon1:c.G19T:p.E7X,PTEN:NM_001304717:exon2:c.G538T:p.E180X	.	.	.	D	A	.	.	.	.	.	.	D	37	0.956	1	Satterstrom2020	1264011	1264011		1273001	1275032	Male	NA	NA	NA
755	08C76383||10_89692818_T_C	exome	NDD	autism	10_89692818_T_C	10	89692818	T	C	5728	PTEN	+	CDS			exonic	PTEN	.	nonsynonymous SNV	PTEN:NM_000314:exon5:c.T302C:p.I101T,PTEN:NM_001304717:exon6:c.T821C:p.I274T	D	D	D	D	D	M	D	D	D	D	D	D	25.7	0.964	1	Satterstrom2020	08C76383	08C76383		08C76384	08C76559	Male	NA	NA	NA
756	DDDP118244||10_89692904_C_T	exome	NDD	DD	10_89692904_C_T	10	89692904	C	T	5728	PTEN	+	CDS			exonic	PTEN	.	stopgain	PTEN:NM_000314:exon5:c.C388T:p.R130X,PTEN:NM_001304717:exon6:c.C907T:p.R303X	.	.	.	D	A	.	.	.	.	.	.	D	39	0.852	1	Heyne_2018	DDDP118244		simplex			female	NA	NA	NA
757	14433.p1||10_89692908_C_T	exome	NDD	autism;ASD	10_89692908_C_T	10	89692908	C	T	5728	PTEN	+	CDS			exonic	PTEN	.	nonsynonymous SNV	PTEN:NM_000314:exon5:c.C392T:p.T131I,PTEN:NM_001304717:exon6:c.C911T:p.T304I	D	D	D	D	D	M	D	D	D	D	D	D	27.8	0.852	1	Krumm;Heyne_2018;SSC_Iossifov_2014	14433.p1	;14433	;simplex	;14433.fa	;14433.mo	;male;Male	NA	NA	NA
758	DDDP112550||10_89692936_A_C	exome	NDD	DD	10_89692936_A_C	10	89692936	A	C	5728	PTEN	+	CDS			exonic	PTEN	.	nonsynonymous SNV	PTEN:NM_000314:exon5:c.A420C:p.L140F,PTEN:NM_001304717:exon6:c.A939C:p.L313F	D	D	D	D	D	M	D	D	D	D	D	D	24.3	0.16	1	Heyne_2018	DDDP112550		simplex			female	NA	NA	NA
759	151853||10_89692965_A_G	exome	NDD	autism	10_89692965_A_G	10	89692965	A	G	5728	PTEN	+	CDS			exonic	PTEN	.	nonsynonymous SNV	PTEN:NM_000314:exon5:c.A449G:p.E150G,PTEN:NM_001304717:exon6:c.A968G:p.E323G	D	D	P	D	D	M	D	D	D	D	D	D	23.9	1.088	1	Satterstrom2020	151853	151853		152736	152737	Male	NA	NA	NA
760	AU065A||10_89711874_G_A	exome	NDD	autism	10_89711874_G_A	10	89711874	G	A	5728	PTEN	+	intron			splicing	PTEN	NM_001304718:exon6:UTR5;NM_001304717:exon7:c.1012-1G>A;NM_000314:exon6:c.493-1G>A	.	.	.	.	.	.	D	.	.	.	.	.	.	D	25.7	0.998	1	DeRubeis2014;Satterstrom2020	AU065A	;AU065A		;AU065B	;AU065C	;Male	NA	NA	NA
761	11390.p1||10_89711882_C_A	exome	NDD	ASD;autism	10_89711882_C_A	10	89711882	C	A	5728	PTEN	+	CDS			exonic	PTEN	.	nonsynonymous SNV	PTEN:NM_000314:exon6:c.C500A:p.T167N,PTEN:NM_001304717:exon7:c.C1019A:p.T340N	D	D	D	D	D	M	D	D	D	D	D	D	28.4	0.892	1	Heyne_2018;Satterstrom2020	11390.p1	;11390	simplex;	;6751	;6201	female;Female	NA	NA	NA
762	Kun-Rodrigues14||10_89711992_C_T	exome	NDD	early_onset_parkinson	10_89711992_C_T	10	89711992	C	T	5728	PTEN	+	CDS			exonic	PTEN	.	nonsynonymous SNV	PTEN:NM_000314:exon6:c.C610T:p.P204S,PTEN:NM_001304718:exon6:c.C19T:p.P7S,PTEN:NM_001304717:exon7:c.C1129T:p.P377S	T	D	P	D	D	M	D	D	D	D	D	D	24.9	0.892	1	Kun-Rodrigues	Kun-Rodrigues14						NA	NA	NA
763	u||10_89717712_C_T	exome	NDD	EE	10_89717712_C_T	10	89717712	C	T	5728	PTEN	+	CDS			exonic	PTEN	.	nonsynonymous SNV	PTEN:NM_000314:exon7:c.C737T:p.P246L,PTEN:NM_001304718:exon7:c.C146T:p.P49L,PTEN:NM_001304717:exon8:c.C1256T:p.P419L	D	P	B	D	D	M	D	D	D	D	D	D	23.8	0.807	0.99	Heyne_2018	u		simplex			female	NA	NA	NA
764	1158-1||10_90497477_G_A	exome	NDD	schizophrenia	10_90497477_G_A	10	90497477	G	A	643414	LIPK	+	CDS			exonic	LIPK	.	nonsynonymous SNV	LIPK:NM_001080518:exon6:c.G755A:p.R252H	T	B	B	N	N	N	T	N	T	T	T	N	10.28	-0.625	0.05	Fromer2014	1158-1						NA	NA	NA
765	2123-1||10_90583123_C_T	exome	NDD	schizophrenia	10_90583123_C_T	10	90583123	C	T	118932	ANKRD22	-	CDS			exonic	ANKRD22	.	nonsynonymous SNV	ANKRD22:NM_144590:exon5:c.G412A:p.A138T	D	P	P	D	D	M	T	N	D	T	D	D	26.8	0.038	0.006	Fromer2014	2123-1						NA	NA	NA
766	2013-1||10_90695012_C_T	exome	NDD	schizophrenia	10_90695012_C_T	10	90695012	C	T	59	ACTA2	-	CDS			exonic	ACTA2	.	nonsynonymous SNV	ACTA2:NM_001141945:exon9:c.G1102A:p.G368R,ACTA2:NM_001320855:exon9:c.G1102A:p.G368R,ACTA2:NM_001613:exon9:c.G1102A:p.G368R	.	D	D	D	D	H	D	D	D	D	D	D	34	0.935	0.655	Fromer2014	2013-1						NA	NA	NA
767	09C86398||10_91066264_G_A	exome	NDD	autism	10_91066264_G_A	10	91066264	G	A	3433	IFIT2	+	CDS			exonic	IFIT2	.	nonsynonymous SNV	IFIT2:NM_001547:exon2:c.G551A:p.R184H	T	D	P	U	D	M	T	D	T	T	T	D	17.15	1.048	0.435	Satterstrom2020	09C86398	09C86398		09C86441	09C86399	Male	NA	NA	NA
768	25007.p1||10_91143464_T_C	exome	NDD	tourette_syndrome	10_91143464_T_C	10	91143464	T	C	439996	IFIT1B	+	CDS			exonic	IFIT1B	.	nonsynonymous SNV	IFIT1B:NM_001010987:exon2:c.T394C:p.S132P	T	D	P	U	N	M	T	D	T	T	D	N	15.25	0.787	0.727	Willsey2017	25007.p1						NA	NA	NA
769	11800.s1||10_91144012_T_C	exome	control	control	10_91144012_T_C	10	91144012	T	C	439996	IFIT1B	+	CDS			exonic	IFIT1B	.	synonymous SNV	IFIT1B:NM_001010987:exon2:c.T942C:p.D314D	.	.	.	.	.	.	.	.	.	.	.	.	.	.	.	Krumm;Satterstrom2020	11800.s1	;11800		;SSC03320	;SSC03304	;Male	NA	NA	NA
770	12994.s1||10_91174508_C_T	exome	control	control	10_91174508_C_T	10	91174508	C	T	24138	IFIT5	+	5'UTR			UTR5	IFIT5	NM_012420:c.-48C>T	.	.	.	.	.	.	.	.	.	.	.	.	.	.	.	.	.	Iossifov;Satterstrom2020	12994.s1	;12994		;12994.fa	;12994.mo	;Male	NA	NA	NA
771	25071.p1||10_91192929_C_G	exome	NDD	tourette_syndrome	10_91192929_C_G	10	91192929	C	G	387700	SLC16A12	-	CDS			exonic	SLC16A12	.	nonsynonymous SNV	SLC16A12:NM_213606:exon8:c.G1443C:p.K481N	D	P	P	D	D	M	T	N	T	T	T	D	26.9	0.892	0.996	Willsey2017	25071.p1						NA	NA	NA
772	80001100648||10_91352590_C_T	exome	NDD	autism	10_91352590_C_T	10	91352590	C	T	53354	PANK1	-	intron			intronic	PANK1	.	.	.	.	.	.	.	.	.	.	.	.	.	.	.	.	.	.	Satterstrom2020	80001100648	80001100648		80001100648-2	80001100648-1	Male	NA	NA	NA
773	2272-1||10_91479214_A_G	exome	NDD	schizophrenia	10_91479214_A_G	10	91479214	A	G	9585	KIF20B	+	CDS			exonic	KIF20B	.	synonymous SNV	KIF20B:NM_001284259:exon13:c.A1473G:p.K491K,KIF20B:NM_016195:exon13:c.A1473G:p.K491K	.	.	.	.	.	.	.	.	.	.	.	.	.	.	.	Fromer2014	2272-1						NA	NA	NA
774	ER49204||10_91497153_A_G	exome	NDD	ID;ID	10_91497153_A_G	10	91497153	A	G	9585	KIF20B	+	CDS			exonic	KIF20B	.	nonsynonymous SNV	KIF20B:NM_001284259:exon20:c.A2555G:p.H852R,KIF20B:NM_016195:exon20:c.A2435G:p.H812R	T	P	B	N	N	L	T	N	T	T	T	N	0.002	-0.25	0.466	Rauch2012;Heyne_2018	ER49204		;simplex			;male	NA	NA	NA
775	DDDP111354||10_92655664_G_A	exome	NDD	DD	10_92655664_G_A	10	92655664	G	A	10556	RPP30	+	CDS			exonic	RPP30	.	nonsynonymous SNV	RPP30:NM_001104546:exon9:c.G607A:p.V203M,RPP30:NM_006413:exon9:c.G607A:p.V203M	D	D	P	D	D	M	T	D	T	T	D	D	28.4	1.048	0.988	Heyne_2018	DDDP111354		simplex			female	NA	NA	NA
776	DDDP112114||10_93021105_G_A	exome	NDD	DD	10_93021105_G_A	10	93021105	G	A	84333	PCGF5	+	CDS			exonic	PCGF5	.	nonsynonymous SNV	PCGF5:NM_001256549:exon7:c.G497A:p.R166Q,PCGF5:NM_001257101:exon7:c.G497A:p.R166Q,PCGF5:NM_032373:exon7:c.G497A:p.R166Q	D	D	B	D	D	M	T	D	T	T	T	D	27.6	1.048	0.999	Heyne_2018	DDDP112114		simplex			male	NA	NA	NA
777	14485.p1||10_93257_G_A	exome	NDD	autism	10_93257_G_A	10	93257	G	A	347688	TUBB8	-	CDS			exonic	TUBB8	.	nonsynonymous SNV	TUBB8:NM_177987:exon4:c.C1075T:p.R359W	D	D	P	U	D	M	D	D	T	D	.	D	24.7	-0.792	0.021	Iossifov	14485.p1						NA	NA	NA
778	10C117939||10_93258772_T_C	exome	NDD	autism	10_93258772_T_C	10	93258772	T	C	143279	HECTD2	+	intron			ncRNA_intronic	HECTD2-AS1	.	.	.	.	.	.	.	.	.	.	.	.	.	.	.	.	.	.	Satterstrom2020	10C117939	10C117939		10C117938	10C117937	Male	NA	NA	NA
779	DDDP106139||10_93605547_A_G	exome	NDD	DD	10_93605547_A_G	10	93605547	A	G	80351	TNKS2	+	CDS			exonic	TNKS2	.	synonymous SNV	TNKS2:NM_025235:exon18:c.A2208G:p.A736A	.	.	.	.	.	.	.	.	.	.	.	.	.	.	.	Heyne_2018	DDDP106139		simplex			female	NA	NA	NA
780	ZH61135||10_93605618_T_C	exome	NDD	ID;ID	10_93605618_T_C	10	93605618	T	C	80351	TNKS2	+	CDS			exonic	TNKS2	.	nonsynonymous SNV	TNKS2:NM_025235:exon18:c.T2279C:p.L760P	D	D	D	D	D	M	T	D	D	D	D	D	28.1	1.061	1	Rauch2012;Heyne_2018	ZH61135		;simplex			;male	NA	NA	NA
781	12724.p1||10_93608137_T_C	exome	NDD	autism	10_93608137_T_C	10	93608137	T	C	80351	TNKS2	+	intron			intronic	TNKS2	.	.	.	.	.	.	.	.	.	.	.	.	.	.	.	.	.	.	Satterstrom2020	12724.p1	12724		SSC05504	SSC05479	Female	NA	NA	NA
782	kd||10_93614832_T_A	exome	NDD	EE	10_93614832_T_A	10	93614832	T	A	80351	TNKS2	+	CDS			exonic	TNKS2	.	synonymous SNV	TNKS2:NM_025235:exon22:c.T2862A:p.I954I	.	.	.	.	.	.	.	.	.	.	.	.	.	.	.	Heyne_2018	kd		simplex			female	NA	NA	NA
783	152430||10_93753608_T_C	exome	NDD	autism	10_93753608_T_C	10	93753608	T	C	9044	BTAF1	+	intron			intronic	BTAF1	.	.	.	.	.	.	.	.	.	.	.	.	.	.	.	.	.	.	Satterstrom2020	152430	152430		152431	152432	Male	NA	NA	NA
784	G01-GEA-301-HI||10_93767924_A_G	exome	NDD	autism	10_93767924_A_G	10	93767924	A	G	9044	BTAF1	+	CDS			exonic	BTAF1	.	synonymous SNV	BTAF1:NM_003972:exon26:c.A3705G:p.Q1235Q	.	.	.	.	.	.	.	.	.	.	.	.	.	.	.	Satterstrom2020	G01-GEA-301-HI	G01-GEA-301-HI		G01-GEA-301-PA	G01-GEA-301-MA	Male	NA	NA	NA
785	80247509||10_93870951_C_G	exome	NDD	tourette_syndrome	10_93870951_C_G	10	93870951	C	G	22849	CPEB3	-	CDS			exonic	CPEB3	.	nonsynonymous SNV	CPEB3:NM_001178137:exon7:c.G1412C:p.G471A,CPEB3:NM_014912:exon7:c.G1454C:p.G485A	D	P	P	D	D	M	T	D	T	T	.	D	27.3	0.935	0.998	Willsey2017	80247509						NA	NA	NA
786	13542.p1||10_93904685_T_G	exome	NDD	autism	10_93904685_T_G	10	93904685	T	G	22849	CPEB3	-	intron			intronic	CPEB3	.	.	.	.	.	.	.	.	.	.	.	.	.	.	.	.	.	.	Satterstrom2020	13542.p1	13542		SSC08251	SSC08248	Male	NA	NA	NA
787	1409001||10_94220998_C_T	exome	NDD	autism	10_94220998_C_T	10	94220998	C	T	3416	IDE	-	CDS			exonic	IDE	.	nonsynonymous SNV	IDE:NM_001165946:exon12:c.G1108A:p.V370I,IDE:NM_001322797:exon12:c.G1108A:p.V370I,IDE:NM_001322794:exon21:c.G2656A:p.V886I,IDE:NM_001322793:exon22:c.G2773A:p.V925I,IDE:NM_001322796:exon22:c.G2650A:p.V884I,IDE:NM_004969:exon22:c.G2773A:p.V925I,IDE:NM_001322795:exon23:c.G2650A:p.V884I	D	P	P	D	D	L	T	N	T	T	T	D	23.2	0.935	0.942	Satterstrom2020	1409001	1409001		1409011	1409012	Male	NA	NA	NA
788	80247551||10_94267962_C_G	exome	NDD	tourette_syndrome	10_94267962_C_G	10	94267962	C	G	3416	IDE	-	CDS			exonic	IDE	.	nonsynonymous SNV	IDE:NM_001322794:exon7:c.G944C:p.G315A,IDE:NM_001322793:exon8:c.G1061C:p.G354A,IDE:NM_001322796:exon8:c.G938C:p.G313A,IDE:NM_004969:exon8:c.G1061C:p.G354A,IDE:NM_001322795:exon9:c.G938C:p.G313A	T	D	D	D	D	M	T	D	T	T	.	D	27.3	0.935	1	Willsey2017	80247551						NA	NA	NA
789	DDDP108899||10_94389961_A_G	exome	NDD	DD	10_94389961_A_G	10	94389961	A	G	3832	KIF11	+	CDS			exonic	KIF11	.	nonsynonymous SNV	KIF11:NM_004523:exon12:c.A1334G:p.N445S	T	B	B	N	D	N	T	N	T	T	D	D	13.46	1.193	0.999	Heyne_2018	DDDP108899		simplex			male	NA	NA	NA
790	00HI1315A||10_94392347_T_G	exome	control	control	10_94392347_T_G	10	94392347	T	G	3832	KIF11	+	CDS			exonic	KIF11	.	nonsynonymous SNV	KIF11:NM_004523:exon13:c.T1599G:p.I533M	T	B	B	N	N	L	T	N	T	T	T	N	12.83	0.144	0.982	Satterstrom2020	00HI1315A	00HI1315A		HI1527	00HI1526B	Male	NA	NA	NA
791	DDDP116301||10_94405301_C_T	exome	NDD	DD	10_94405301_C_T	10	94405301	C	T	3832	KIF11	+	CDS			exonic	KIF11	.	stopgain	KIF11:NM_004523:exon18:c.C2449T:p.Q817X	.	.	.	N	A	.	.	.	.	.	.	N	36	0.039	0.022	Heyne_2018	DDDP116301		simplex			male	NA	NA	NA
792	010-07-107482||10_94449941_G_T	exome	NDD	autism	10_94449941_G_T	10	94449941	G	T	3087	HHEX	+	CDS			exonic	HHEX	.	synonymous SNV	HHEX:NM_002729:exon1:c.G198T:p.R66R	.	.	.	.	.	.	.	.	.	.	.	.	.	.	.	Satterstrom2020	010-07-107482	010-07-107482		012-07-107484	011-07-107483	Male	NA	NA	NA
793	12363.p1||10_94659341_T_C	exome	NDD	autism	10_94659341_T_C	10	94659341	T	C	54536	EXOC6	+	intron			intronic	EXOC6	.	.	.	.	.	.	.	.	.	.	.	.	.	.	.	.	.	.	Satterstrom2020	12363.p1	12363		SSC05311	SSC05304	Male	NA	NA	NA
794	DDDP105255||10_94833763_G_T	exome	NDD	DD	10_94833763_G_T	10	94833763	G	T	1592	CYP26A1	+	CDS			exonic	CYP26A1	.	synonymous SNV	CYP26A1:NM_000783:exon1:c.G72T:p.A24A	.	.	.	.	.	.	.	.	.	.	.	.	.	.	.	Heyne_2018	DDDP105255		simplex			male	NA	NA	NA
795	DDDP110762||10_94834602_G_A	exome	NDD	DD	10_94834602_G_A	10	94834602	G	A	1592	CYP26A1	+	CDS			exonic	CYP26A1	.	nonsynonymous SNV	CYP26A1:NM_000783:exon3:c.G481A:p.G161S,CYP26A1:NM_057157:exon3:c.G274A:p.G92S	T	B	B	N	N	N	T	N	T	T	T	N	8.646	0.103	0.153	Heyne_2018	DDDP110762		simplex			female	NA	NA	NA
796	14519.p1||10_94836446_A_G	exome	NDD	autism	10_94836446_A_G	10	94836446	A	G	1592	CYP26A1	+	CDS			exonic	CYP26A1	.	nonsynonymous SNV	CYP26A1:NM_000783:exon6:c.A1145G:p.E382G,CYP26A1:NM_057157:exon6:c.A938G:p.E313G	D	D	D	D	D	M	T	D	T	T	D	D	26.9	1.199	1	Krumm	14519.p1						NA	NA	NA
797	08C77878||10_95079797_G_A	exome	NDD	autism	10_95079797_G_A	10	95079797	G	A	26509	MYOF	-	intron			intronic	MYOF	.	.	.	.	.	.	.	.	.	.	.	.	.	.	.	.	.	.	Satterstrom2020	08C77878	08C77878		08C77880	08C77879	Male	NA	NA	NA
798	DDDP111692||10_95082844_T_C	exome	NDD	DD	10_95082844_T_C	10	95082844	T	C	26509	MYOF	-	CDS			exonic	MYOF	.	nonsynonymous SNV	MYOF:NM_133337:exon47:c.A5408G:p.Y1803C,MYOF:NM_013451:exon48:c.A5447G:p.Y1816C	D	D	D	D	D	H	T	D	D	D	D	D	28.5	1.061	0.997	Heyne_2018	DDDP111692		simplex			male	NA	NA	NA
799	G01-GEA-65-HI||10_95083024_T_G	exome	NDD	autism	10_95083024_T_G	10	95083024	T	G	26509	MYOF	-	intron			intronic	MYOF	.	.	.	.	.	.	.	.	.	.	.	.	.	.	.	.	.	.	Satterstrom2020	G01-GEA-65-HI	G01-GEA-65-HI		G01-GEA-65-PA	G01-GEA-65-MA	Male	NA	NA	NA
800	4049-1||10_95107512_G_A	exome	NDD	schizophrenia	10_95107512_G_A	10	95107512	G	A	26509	MYOF	-	CDS			exonic	MYOF	.	nonsynonymous SNV	MYOF:NM_133337:exon36:c.C4072T:p.P1358S,MYOF:NM_013451:exon37:c.C4111T:p.P1371S	D	D	D	D	D	H	T	D	D	D	D	D	26.3	1.048	0.996	Fromer2014	4049-1						NA	NA	NA
801	DDDP108867||10_95109601_T_C	exome	NDD	DD	10_95109601_T_C	10	95109601	T	C	26509	MYOF	-	CDS			exonic	MYOF	.	synonymous SNV	MYOF:NM_133337:exon35:c.A4008G:p.T1336T,MYOF:NM_013451:exon36:c.A4047G:p.T1349T	.	.	.	.	.	.	.	.	.	.	.	.	.	.	.	Heyne_2018	DDDP108867		simplex			male	NA	NA	NA
802	152839||10_95140944_C_T	exome	NDD	autism	10_95140944_C_T	10	95140944	C	T	26509	MYOF	-	intron			intronic	MYOF	.	.	.	.	.	.	.	.	.	.	.	.	.	.	.	.	.	.	Satterstrom2020	152839	152839		152840	152841	Female	NA	NA	NA
803	12240.s1||10_95211804_T_G	exome	control	control	10_95211804_T_G	10	95211804	T	G	26509	MYOF	-	intron			intronic	MYOF	.	.	.	.	.	.	.	.	.	.	.	.	.	.	.	.	.	.	Iossifov;Satterstrom2020	12240.s1	;12240		;12240.fa	;12240.mo	;Female	NA	NA	NA
804	ej||10_95275297_A_C	exome	NDD	EE	10_95275297_A_C	10	95275297	A	C	55165	CEP55	+	CDS			exonic	CEP55	.	nonsynonymous SNV	CEP55:NM_001127182:exon5:c.A664C:p.K222Q,CEP55:NM_018131:exon5:c.A664C:p.K222Q	T	B	B	N	N	L	T	N	T	T	T	D	10.9	1.199	0.969	Heyne_2018	ej		simplex			male	NA	NA	NA
805	11984.p1||10_95372793_G_A	exome	NDD	autism	10_95372793_G_A	10	95372793	G	A	5146	PDE6C	+	CDS			exonic	PDE6C	.	nonsynonymous SNV	PDE6C:NM_006204:exon1:c.G311A:p.R104Q	D	D	D	D	D	M	T	N	T	T	D	D	28.6	1.048	0.334	Iossifov;Satterstrom2020	11984.p1	;11984		;11984.fa	;11984.mo	;Male	NA	NA	NA
806	F10314-4||10_96098519_T_C	exome	NDD	autism	10_96098519_T_C	10	96098519	T	C	64318	NOC3L	-	intron			intronic	NOC3L	.	.	.	.	.	.	.	.	.	.	.	.	.	.	.	.	.	.	Satterstrom2020	F10314-4	F10314-4		F10314-3	F10314-2	Male	NA	NA	NA
807	DDDP109020||10_96099617_C_T	exome	NDD	DD	10_96099617_C_T	10	96099617	C	T	64318	NOC3L	-	CDS			exonic	NOC3L	.	nonsynonymous SNV	NOC3L:NM_022451:exon17:c.G1841A:p.R614H	D	D	D	D	D	M	T	D	T	T	D	D	35	0.935	1	Heyne_2018	DDDP109020		simplex			male	NA	NA	NA
808	NDAR_INVAY708XG8_wes1||10_96322608_A_G	exome	NDD	autism	10_96322608_A_G	10	96322608	A	G	3070	HELLS	+	CDS||5'UTR			exonic	HELLS	.	nonsynonymous SNV	HELLS:NM_001289067:exon6:c.A410G:p.N137S,HELLS:NM_001289068:exon6:c.A362G:p.N121S,HELLS:NM_001289069:exon6:c.A410G:p.N137S,HELLS:NM_001289070:exon6:c.A410G:p.N137S,HELLS:NM_001289072:exon6:c.A410G:p.N137S,HELLS:NM_018063:exon6:c.A410G:p.N137S,HELLS:NM_001289071:exon7:c.A38G:p.N13S	T	B	B	N	D	L	T	N	T	D	D	D	1.802	-0.129	0.993	DeRubeis2014;De_Rubeis_2014	NDAR_INVAY708XG8_wes1	;NDAR_INVAY708XG8_wes1		;NDAR_INVKP914AKF_wes1	;NDAR_INVJL297ETT_wes1	;Male	NA	NA	NA
809	25138.p1||10_96480273_C_A	exome	NDD	tourette_syndrome	10_96480273_C_A	10	96480273	C	A	1557	CYP2C19	+	CDS||5'UTR			exonic	CYP2C18	.	nonsynonymous SNV	CYP2C18:NM_001128925:exon5:c.C763A:p.L255M,CYP2C18:NM_000772:exon6:c.C940A:p.L314M	T	D	D	U	N	L	T	N	T	T	T	N	10.57	0.024	0.038	Willsey2017	25138.p1						NA	NA	NA
810	13439.s1||10_96495008_T_C	exome	control	control	10_96495008_T_C	10	96495008	T	C	1557	CYP2C19	+	intron			intronic	CYP2C18	.	.	.	.	.	.	.	.	.	.	.	.	.	.	.	.	.	.	Iossifov;Satterstrom2020	13439.s1	;13439		;SSC07547	;SSC07544	;Female	NA	NA	NA
811	14253.s1||10_96827403_T_C	exome	control	control	10_96827403_T_C	10	96827403	T	C	1558	CYP2C8	-	CDS||5'UTR			exonic	CYP2C8	.	nonsynonymous SNV	CYP2C8:NM_000770:exon2:c.A214G:p.N72D,CYP2C8:NM_001198853:exon2:c.A4G:p.N2D,CYP2C8:NM_001198855:exon3:c.A4G:p.N2D	D	B	B	U	N	N	T	N	T	T	T	N	10.33	0.023	0.016	Krumm	14253.s1						NA	NA	NA
812	13234.p1||10_96998382_G_A	exome	NDD	autism	10_96998382_G_A	10	96998382	G	A	9124	PDLIM1	-	CDS			exonic	PDLIM1	.	nonsynonymous SNV	PDLIM1:NM_020992:exon6:c.C746T:p.A249V	D	D	P	D	D	M	T	N	T	T	T	D	33	1.048	0.991	Iossifov;Satterstrom2020	13234.p1	;13234		;SSC07415	;SSC07290	;Male	NA	NA	NA
813	AU1433303||10_97028586_C_T	exome	NDD	autism	10_97028586_C_T	10	97028586	C	T	9124	PDLIM1	-	CDS			exonic	PDLIM1	.	synonymous SNV	PDLIM1:NM_020992:exon3:c.G282A:p.T94T	.	.	.	.	.	.	.	.	.	.	.	.	.	.	.	Satterstrom2020	AU1433303	AU1433303		AU1433201	AU1433204	Female	NA	NA	NA
814	11931.p1||10_97371016_C_G	exome	NDD	autism;ASD	10_97371016_C_G	10	97371016	C	G	5832	ALDH18A1	-	CDS			exonic	ALDH18A1	.	nonsynonymous SNV	ALDH18A1:NM_001323419:exon13:c.G1471C:p.D491H,ALDH18A1:NM_001323412:exon15:c.G1774C:p.D592H,ALDH18A1:NM_001323416:exon15:c.G1774C:p.D592H,ALDH18A1:NM_001323417:exon15:c.G2002C:p.D668H,ALDH18A1:NM_001323418:exon15:c.G1768C:p.D590H,ALDH18A1:NM_001017423:exon16:c.G2101C:p.D701H,ALDH18A1:NM_001323413:exon16:c.G2107C:p.D703H,ALDH18A1:NM_001323414:exon16:c.G2107C:p.D703H,ALDH18A1:NM_001323415:exon16:c.…	D	B	B	D	N	M	T	N	T	T	D	D	23.2	0.149	0.841	Iossifov;Heyne_2018;Satterstrom2020	11931.p1	;11931	;simplex	;35899	;35901	;male;Male	NA	NA	NA
815	AC02-1197-01||10_97380760_T_G	exome	NDD	autism	10_97380760_T_G	10	97380760	T	G	5832	ALDH18A1	-	intron			intronic	ALDH18A1	.	.	.	.	.	.	.	.	.	.	.	.	.	.	.	.	.	.	Satterstrom2020	AC02-1197-01	AC02-1197-01		AC02-1197-02	AC02-1197-03	Male	NA	NA	NA
816	13154.s1||10_97402824_C_T	exome	control	control	10_97402824_C_T	10	97402824	C	T	5832	ALDH18A1	-	CDS			exonic	ALDH18A1	.	synonymous SNV	ALDH18A1:NM_001017423:exon3:c.G228A:p.K76K,ALDH18A1:NM_001323413:exon3:c.G228A:p.K76K,ALDH18A1:NM_001323414:exon3:c.G228A:p.K76K,ALDH18A1:NM_001323415:exon3:c.G228A:p.K76K,ALDH18A1:NM_001323417:exon3:c.G228A:p.K76K,ALDH18A1:NM_002860:exon3:c.G228A:p.K76K	.	.	.	.	.	.	.	.	.	.	.	.	.	.	.	Iossifov;SSC_Iossifov_2014	13154.s1	;13154		;13154.fa	;13154.mo	;Male	NA	NA	NA
817	DDDP102493||10_97442905_T_A	exome	NDD	DD	10_97442905_T_A	10	97442905	T	A	26123	TCTN3	-	CDS			exonic	TCTN3	.	nonsynonymous SNV	TCTN3:NM_001143973:exon7:c.A807T:p.R269S,TCTN3:NM_015631:exon11:c.A1251T:p.R417S	D	B	B	N	N	M	.	D	T	T	D	D	15.98	1.061	0.277	Heyne_2018	DDDP102493		simplex			female	NA	NA	NA
818	13690.p1||10_97446866_C_T	exome	NDD	autism	10_97446866_C_T	10	97446866	C	T	26123	TCTN3	-	CDS			exonic	TCTN3	.	nonsynonymous SNV	TCTN3:NM_001143973:exon4:c.G550A:p.A184T,TCTN3:NM_015631:exon6:c.G787A:p.A263T	D	B	B	N	N	L	D	D	T	T	T	N	10.38	0.065	0.913	Krumm	13690.p1						NA	NA	NA
819	09C87630||10_97816903_G_A	exome	NDD	autism	10_97816903_G_A	10	97816903	G	A	54619	CCNJ	+	CDS			exonic	CCNJ	.	synonymous SNV	CCNJ:NM_001134375:exon5:c.G639A:p.S213S,CCNJ:NM_001134376:exon5:c.G603A:p.S201S,CCNJ:NM_019084:exon5:c.G606A:p.S202S	.	.	.	.	.	.	.	.	.	.	.	.	.	.	.	DeRubeis2014;Satterstrom2020	09C87630	;09C87630		;09C87631	;09C87632	;Male	NA	NA	NA
820	12396.s1||10_97920132_C_T	exome	control	control	10_97920132_C_T	10	97920132	C	T	9849	ZNF518A	+	CDS||3'UTR			exonic	ZNF518A	.	unknown	UNKNOWN	.	D	D	.	.	.	.	.	.	.	.	D	12.21	0.931	1	Iossifov;Satterstrom2020	12396.s1	;12396		;SSC05108	;SSC05097	;Female	NA	NA	NA
821	DDDP101470||10_97951841_C_A	exome	NDD	DD	10_97951841_C_A	10	97951841	C	A	29760	BLNK	-	CDS			exonic	BLNK	.	nonsynonymous SNV	BLNK:NM_001258442:exon14:c.G788T:p.G263V,BLNK:NM_001258441:exon15:c.G1034T:p.G345V,BLNK:NM_001114094:exon16:c.G1190T:p.G397V,BLNK:NM_001258440:exon16:c.G1103T:p.G368V,BLNK:NM_013314:exon17:c.G1259T:p.G420V	D	D	P	N	D	N	T	D	T	T	D	N	27.3	0.935	1	Heyne_2018	DDDP101470		simplex			male	NA	NA	NA
822	09C89995||10_98064396_C_T	exome	NDD	autism	10_98064396_C_T	10	98064396	C	T	1791	DNTT	+	CDS			exonic	DNTT	.	nonsynonymous SNV	DNTT:NM_001017520:exon1:c.C142T:p.R48C,DNTT:NM_004088:exon1:c.C142T:p.R48C	D	D	D	D	D	M	T	D	D	D	D	D	34	0.935	0.983	DeRubeis2014;Satterstrom2020	09C89995	;09C89995		;09C89997	;09C89996	;Male	NA	NA	NA
823	DDDP110714||10_98109538_C_A	exome	NDD	DD	10_98109538_C_A	10	98109538	C	A	93377	OPALIN	-	CDS			exonic	OPALIN	.	nonsynonymous SNV	OPALIN:NM_001040102:exon2:c.G49T:p.V17L,OPALIN:NM_001284320:exon3:c.G85T:p.V29L,OPALIN:NM_001284321:exon3:c.G82T:p.V28L,OPALIN:NM_033207:exon4:c.G118T:p.V40L,OPALIN:NM_001040103:exon5:c.G88T:p.V30L,OPALIN:NM_001284322:exon5:c.G88T:p.V30L,OPALIN:NM_001284323:exon5:c.G88T:p.V30L,OPALIN:NM_001284324:exon5:c.G88T:p.V30L	T	B	B	N	N	L	.	N	T	T	T	D	23.6	0.023	0.583	Heyne_2018	DDDP110714		simplex			male	NA	NA	NA
824	DEASD_0187_001||10_98145792_A_T	exome	NDD	autism	10_98145792_A_T	10	98145792	A	T	7093	TLL2	-	intron			intronic	TLL2	.	.	.	.	.	.	.	.	.	.	.	.	.	.	.	.	.	.	Satterstrom2020	DEASD_0187_001	DEASD_0187_001		DEASD_0187_500	DEASD_0187_600	Male	NA	NA	NA
825	4120-1||10_98287002_G_A	exome	NDD	schizophrenia	10_98287002_G_A	10	98287002	G	A	56889	TM9SF3	-	CDS			exonic	TM9SF3	.	nonsynonymous SNV	TM9SF3:NM_020123:exon14:c.C1670T:p.A557V	D	D	B	D	D	M	T	D	T	T	D	D	24	0.998	0.998	Fromer2014	4120-1						NA	NA	NA
826	DDDP102074||10_98336528_C_T	exome	NDD	DD	10_98336528_C_T	10	98336528	C	T	56889	TM9SF3	-	CDS			exonic	TM9SF3	.	nonsynonymous SNV	TM9SF3:NM_020123:exon2:c.G161A:p.R54H	D	D	D	D	D	M	T	D	T	T	D	D	34	0.935	0.999	Heyne_2018	DDDP102074		simplex			female	NA	NA	NA
827	bl||10_98380294_T_A	exome	NDD	EE	10_98380294_T_A	10	98380294	T	A	118788	PIK3AP1	-	CDS			exonic	PIK3AP1	.	nonsynonymous SNV	PIK3AP1:NM_152309:exon12:c.A1756T:p.R586W	D	D	D	D	D	L	T	D	T	T	D	D	28	1.061	0.897	Heyne_2018	bl		simplex			male	NA	NA	NA
828	aii||10_98405347_C_T	exome	NDD	EE	10_98405347_C_T	10	98405347	C	T	118788	PIK3AP1	-	CDS			exonic	PIK3AP1	.	nonsynonymous SNV	PIK3AP1:NM_152309:exon8:c.G1258A:p.E420K	D	D	D	D	D	M	T	N	T	T	T	D	28.5	0.935	0.906	Heyne_2018	aii		simplex			male	NA	NA	NA
829	DDDP103769||10_98412489_C_T	exome	NDD	DD	10_98412489_C_T	10	98412489	C	T	118788	PIK3AP1	-	CDS			exonic	PIK3AP1	.	synonymous SNV	PIK3AP1:NM_152309:exon4:c.G678A:p.V226V	.	.	.	.	.	.	.	.	.	.	.	.	.	.	.	Heyne_2018	DDDP103769		simplex			male	NA	NA	NA
830	13227.s1||10_98711911_C_T	exome	control	control	10_98711911_C_T	10	98711911	C	T	84458	LCOR	+	CDS			exonic	LCOR	.	nonsynonymous SNV	LCOR:NM_001170765:exon7:c.C290T:p.S97F,LCOR:NM_001170766:exon7:c.C290T:p.S97F,LCOR:NM_001346516:exon7:c.C290T:p.S97F,LCOR:NM_032440:exon7:c.C290T:p.S97F	D	B	B	N	D	L	.	D	T	T	T	D	28.9	0.892	0.998	Iossifov;Satterstrom2020	13227.s1	;13227		;SSC08506	;SSC08503	;Female	NA	NA	NA
831	117-11-113853||10_98778784_C_G	exome	control	control	10_98778784_C_G	10	98778784	C	G	6585	SLIT1	-	CDS			exonic	SLIT1	.	nonsynonymous SNV	SLIT1:NM_003061:exon27:c.G2827C:p.D943H	T	B	B	D	D	L	D	D	D	D	D	D	20.4	0.87	0.543	Satterstrom2020	117-11-113853	117-11-113853		133-11-113851	132-11-113850	Female	NA	NA	NA
832	Fam_73988||10_98806785_T_C	exome	NDD	EE	10_98806785_T_C	10	98806785	T	C	6585	SLIT1	-	CDS			exonic	SLIT1	.	nonsynonymous SNV	SLIT1:NM_003061:exon17:c.A1672G:p.T558A	T	B	B	D	D	N	T	D	T	T	T	D	18.7	0.964	0.999	Heyne_2018	Fam_73988		simplex			male	NA	NA	NA
833	DDDP111231||10_99052336_C_G	exome	NDD	DD	10_99052336_C_G	10	99052336	C	G	84986	ARHGAP19	-	CDS||5'UTR			exonic	ARHGAP19	.	nonsynonymous SNV	ARHGAP19:NM_001204300:exon1:c.G49C:p.G17R,ARHGAP19:NM_032900:exon1:c.G49C:p.G17R	T	B	B	N	N	N	T	N	T	T	T	N	17.61	-0.482	0.009	Heyne_2018	DDDP111231		simplex			female	NA	NA	NA
834	da||10_99093641_C_G	exome	NDD	EE	10_99093641_C_G	10	99093641	C	G	23401	FRAT2	-	CDS			exonic	FRAT2	.	nonsynonymous SNV	FRAT2:NM_012083:exon1:c.G689C:p.G230A	T	B	B	.	N	L	.	N	T	T	T	N	1.344	-0.021	0.389	Heyne_2018	da		simplex			female	NA	NA	NA
835	440-04-101592||10_99120379_T_C	exome	NDD	autism	10_99120379_T_C	10	99120379	T	C	23223	RRP12	-	intron			intronic	RRP12	.	.	.	.	.	.	.	.	.	.	.	.	.	.	.	.	.	.	Satterstrom2020	440-04-101592	440-04-101592		461-04-101677	441-04-101596	Male	NA	NA	NA
836	200675324@1082034490||10_99131929_C_T	exome	NDD	autism	10_99131929_C_T	10	99131929	C	T	23223	RRP12	-	intron			intronic	RRP12	.	.	.	.	.	.	.	.	.	.	.	.	.	.	.	.	.	.	Satterstrom2020	200675324@1082034490	200675324@1082034490		200675322@1082034683	200675323@1082034214	Female	NA	NA	NA
837	AC04-1008-01||10_99160118_C_T	exome	NDD	autism	10_99160118_C_T	10	99160118	C	T	23223	RRP12	-	CDS			exonic	RRP12	.	nonsynonymous SNV	RRP12:NM_001145114:exon2:c.G313A:p.V105I,RRP12:NM_001284337:exon2:c.G313A:p.V105I,RRP12:NM_015179:exon2:c.G313A:p.V105I	T	P	B	N	D	L	T	N	T	T	T	N	22.8	0.919	0.998	DeRubeis2014;Satterstrom2020	AC04-1008-01	;AC04-1008-01		;AC04-1008-02	;AC04-1008-03	;Male	NA	NA	NA
838	11114.s1||10_99211655_G_A	exome	control	control	10_99211655_G_A	10	99211655	G	A	84287	ZDHHC16	+	CDS			exonic	ZDHHC16	.	nonsynonymous SNV	ZDHHC16:NM_001287804:exon2:c.G223A:p.V75M,ZDHHC16:NM_032327:exon2:c.G223A:p.V75M,ZDHHC16:NM_198043:exon2:c.G223A:p.V75M,ZDHHC16:NM_198044:exon2:c.G223A:p.V75M,ZDHHC16:NM_198045:exon2:c.G223A:p.V75M,ZDHHC16:NM_001287803:exon3:c.G223A:p.V75M,ZDHHC16:NM_198046:exon3:c.G223A:p.V75M	T	B	B	N	D	M	T	N	T	T	T	D	18.74	0.953	0.996	Iossifov;Satterstrom2020	11114.s1	;11114		;SSC00348	;SSC00347	;Female	NA	NA	NA
839	13537.p1||10_99219007_A_G	exome	NDD	autism	10_99219007_A_G	10	99219007	A	G	64210	MMS19	-	CDS			exonic	MMS19	.	synonymous SNV	MMS19:NM_001330128:exon27:c.T2643C:p.H881H,MMS19:NM_001289403:exon28:c.T2808C:p.H936H,MMS19:NM_001289404:exon28:c.T2460C:p.H820H,MMS19:NM_001351357:exon28:c.T2463C:p.H821H,MMS19:NM_001351358:exon28:c.T1845C:p.H615H,MMS19:NM_001351359:exon29:c.T1845C:p.H615H,MMS19:NM_022362:exon29:c.T2937C:p.H979H,MMS19:NM_001289405:exon30:c.T2937C:p.H979H,MMS19:NM_001351356:exon30:c.T3054C:p.H1018H	.	.	.	.	.	.	.	.	.	.	.	.	.	.	.	Krumm;Satterstrom2020	13537.p1	;13537		;SSC08306	;SSC08298	;Male	NA	NA	NA
840	11068.p1||10_99223622_A_G	exome	NDD	autism	10_99223622_A_G	10	99223622	A	G	64210	MMS19	-	CDS			exonic	MMS19	.	synonymous SNV	MMS19:NM_001330128:exon17:c.T1611C:p.S537S,MMS19:NM_001289403:exon18:c.T1776C:p.S592S,MMS19:NM_001289404:exon18:c.T1428C:p.S476S,MMS19:NM_001351357:exon18:c.T1431C:p.S477S,MMS19:NM_001351358:exon18:c.T813C:p.S271S,MMS19:NM_001351359:exon19:c.T813C:p.S271S,MMS19:NM_022362:exon19:c.T1905C:p.S635S,MMS19:NM_001289405:exon20:c.T1905C:p.S635S,MMS19:NM_001351356:exon20:c.T2022C:p.S674S	.	.	.	.	.	.	.	.	.	.	.	.	.	.	.	Iossifov;Satterstrom2020	11068.p1	;11068		;SSC00489	;SSC00488	;Male	NA	NA	NA
841	DDDP111952||10_99416595_C_G	exome	NDD	DD	10_99416595_C_G	10	99416595	C	G	55361	PI4K2A	+	CDS||5'UTR			exonic	PI4K2A	.	synonymous SNV	PI4K2A:NM_018425:exon4:c.C786G:p.L262L	.	.	.	.	.	.	.	.	.	.	.	.	.	.	.	Heyne_2018	DDDP111952		simplex			male	NA	NA	NA
842	11511.s1||10_99426263_C_T	exome	control	control	10_99426263_C_T	10	99426263	C	T	55361	PI4K2A	+	CDS			exonic	PI4K2A	.	nonsynonymous SNV	PI4K2A:NM_018425:exon7:c.C1153T:p.L385F	D	D	D	D	D	H	T	D	D	D	D	D	32	0.852	1	Iossifov;Satterstrom2020	11511.s1	;11511		;31712	;31714	;Male	NA	NA	NA
843	DDDP111950||10_99439626_G_T	exome	NDD	DD	10_99439626_G_T	10	99439626	G	T	60370	AVPI1	-	CDS			exonic	AVPI1	.	nonsynonymous SNV	AVPI1:NM_021732:exon2:c.C37A:p.P13T	T	B	B	D	N	L	T	N	T	T	T	D	9.335	1.03	0.04	Heyne_2018	DDDP111950		simplex			female	NA	NA	NA
844	13564.s1||10_99504467_A_G	exome	control	control	10_99504467_A_G	10	99504467	A	G	118813	ZFYVE27	+	intron			intronic	ZFYVE27	.	.	.	.	.	.	.	.	.	.	.	.	.	.	.	.	.	.	SSC_Iossifov_2014	13564.s1	13564		13564.fa	13564.mo	Male	NA	NA	NA
845	DDDP115591||10_99512896_G_A	exome	NDD	DD	10_99512896_G_A	10	99512896	G	A	118813	ZFYVE27	+	CDS			exonic	ZFYVE27	.	synonymous SNV	ZFYVE27:NM_001174122:exon6:c.G624A:p.R208R,ZFYVE27:NM_001174120:exon7:c.G720A:p.R240R,ZFYVE27:NM_001174121:exon7:c.G699A:p.R233R,ZFYVE27:NM_001174119:exon8:c.G882A:p.R294R,ZFYVE27:NM_001002261:exon9:c.G1014A:p.R338R,ZFYVE27:NM_001002262:exon9:c.G978A:p.R326R,ZFYVE27:NM_144588:exon10:c.G999A:p.R333R	.	.	.	.	.	.	.	.	.	.	.	.	.	.	.	Heyne_2018	DDDP115591		simplex			female	NA	NA	NA
846	DDDP102091||10_99527500_C_T	exome	NDD	DD	10_99527500_C_T	10	99527500	C	T	6425	SFRP5	-	CDS			exonic	SFRP5	.	nonsynonymous SNV	SFRP5:NM_003015:exon3:c.G725A:p.R242Q	D	P	P	D	N	L	T	N	T	T	T	N	24.9	0.036	0.998	Heyne_2018	DDDP102091		simplex			male	NA	NA	NA
847	hc||10_99661350_A_G	exome	NDD	EE	10_99661350_A_G	10	99661350	A	G	55118	CRTAC1	-	CDS			exonic	CRTAC1	.	nonsynonymous SNV	CRTAC1:NM_001206528:exon8:c.T1043C:p.V348A,CRTAC1:NM_018058:exon8:c.T1043C:p.V348A	D	P	P	D	D	M	T	D	T	T	D	D	27	1.199	0.478	Heyne_2018	hc		simplex			male	NA	NA	NA
848	08C74159||10_99661390_C_T	exome	NDD	autism	10_99661390_C_T	10	99661390	C	T	55118	CRTAC1	-	CDS			exonic	CRTAC1	.	nonsynonymous SNV	CRTAC1:NM_001206528:exon8:c.G1003A:p.A335T,CRTAC1:NM_018058:exon8:c.G1003A:p.A335T	T	D	P	D	D	M	T	D	T	T	D	D	28.9	0.935	0.997	Satterstrom2020	08C74159	08C74159		08C74161	08C74160	Male	NA	NA	NA
849	80001100914||11_10014526_C_T	exome	NDD	autism	11_10014526_C_T	11	10014526	C	T	81846	SBF2	-	intron			intronic	SBF2	.	.	.	.	.	.	.	.	.	.	.	.	.	.	.	.	.	.	Satterstrom2020	80001100914	80001100914		80001100914-2	80001100914-1	Female	NA	NA	NA
850	13654.p1||11_10014632_C_T	exome	NDD	autism	11_10014632_C_T	11	10014632	C	T	81846	SBF2	-	CDS			exonic	SBF2	.	nonsynonymous SNV	SBF2:NM_030962:exon11:c.G1072A:p.V358I	T	B	B	D	D	N	T	N	T	T	T	D	20.9	0.892	1	Iossifov;Satterstrom2020	13654.p1	;13654		;SSC08301	;SSC08295	;Male	NA	NA	NA
851	DDDP105999||11_100211348_A_G	exome	NDD	DD	11_100211348_A_G	11	100211348	A	G	53942	CNTN5	+	CDS			exonic	CNTN5	.	nonsynonymous SNV	CNTN5:NM_175566:exon19:c.A2662G:p.S888G,CNTN5:NM_001243270:exon21:c.A2884G:p.S962G,CNTN5:NM_014361:exon22:c.A2884G:p.S962G	D	P	B	D	D	M	T	D	T	T	D	D	24.8	1.199	0.993	Heyne_2018	DDDP105999		simplex			male	NA	NA	NA
852	DDDP111246||11_100999268_C_T	exome	NDD	DD	11_100999268_C_T	11	100999268	C	T	5241	PGR	-	CDS			exonic	PGR	.	synonymous SNV	PGR:NM_000926:exon1:c.G534A:p.T178T,PGR:NM_001202474:exon1:c.G42A:p.T14T,PGR:NM_001271161:exon1:c.G42A:p.T14T	.	.	.	.	.	.	.	.	.	.	.	.	.	.	.	Heyne_2018	DDDP111246		simplex			female	NA	NA	NA
853	DDDP101948||11_101374902_C_T	exome	NDD	DD	11_101374902_C_T	11	101374902	C	T	7225	TRPC6	-	CDS			exonic	TRPC6	.	synonymous SNV	TRPC6:NM_004621:exon2:c.G798A:p.S266S	.	.	.	.	.	.	.	.	.	.	.	.	.	.	.	Heyne_2018	DDDP101948		simplex			male	NA	NA	NA
854	DEASD_0330_001||11_1016042_C_G	exome	NDD	autism	11_1016042_C_G	11	1016042	C	G	4588	MUC6	-	CDS			exonic	MUC6	.	nonsynonymous SNV	MUC6:NM_005961:exon31:c.G6759C:p.R2253S	D	B	B	.	N	N	T	N	T	T	T	N	0.363	0.001	0.007	DeRubeis2014	DEASD_0330_001						NA	NA	NA
855	12630.s1||11_1018420_T_G	exome	control	control	11_1018420_T_G	11	1018420	T	G	4588	MUC6	-	CDS			exonic	MUC6	.	nonsynonymous SNV	MUC6:NM_005961:exon31:c.A4381C:p.T1461P	D	P	B	.	N	L	T	N	T	T	T	N	2.284	-1.815	0	SSC_Iossifov_2014	12630.s1	12630		12630.fa	12630.mo	Female	NA	NA	NA
856	13956.p1||11_101952106_G_C	exome	NDD	autism	11_101952106_G_C	11	101952106	G	C	85016	C11orf70	+	intron			intronic	C11orf70	.	.	.	.	.	.	.	.	.	.	.	.	.	.	.	.	.	.	Satterstrom2020	13956.p1	13956		SSC09816	SSC09812	Male	NA	NA	NA
857	ASDFI_882||11_102201741_G_T	exome	NDD	autism	11_102201741_G_T	11	102201741	G	T	330	BIRC3	+	CDS			exonic	BIRC3	.	stopgain	BIRC3:NM_001165:exon6:c.G1093T:p.E365X,BIRC3:NM_182962:exon7:c.G1093T:p.E365X	.	.	.	D	A	.	.	.	.	.	.	D	43	1.029	0.905	DeRubeis2014;Satterstrom2020	ASDFI_882	;ASDFI_882		;ASDFI_932	;ASDFI_933	;Male	NA	NA	NA
858	08C74504||11_102206811_A_T	exome	control	control	11_102206811_A_T	11	102206811	A	T	330	BIRC3	+	CDS			exonic	BIRC3	.	nonsynonymous SNV	BIRC3:NM_001165:exon7:c.A1439T:p.D480V,BIRC3:NM_182962:exon8:c.A1439T:p.D480V	D	B	B	N	N	M	T	D	T	T	T	N	14.43	0.214	0.137	Satterstrom2020	08C74504	08C74504		08C74502	08C74501	Female	NA	NA	NA
859	G01-GEA-143-HI||11_102221343_C_T	exome	NDD	autism	11_102221343_C_T	11	102221343	C	T	329	BIRC2	+	CDS			exonic	BIRC2	.	nonsynonymous SNV	BIRC2:NM_001166:exon2:c.C758T:p.S253F,BIRC2:NM_001256163:exon2:c.C758T:p.S253F,BIRC2:NM_001256166:exon2:c.C611T:p.S204F	T	P	B	N	N	N	T	N	T	T	T	D	23	0.935	0.964	Satterstrom2020	G01-GEA-143-HI	G01-GEA-143-HI		G01-GEA-143-PA	G01-GEA-143-MA	Female	NA	NA	NA
860	12441.s1||11_102234425_A_T	exome	control	control	11_102234425_A_T	11	102234425	A	T	329	BIRC2	+	CDS			exonic	BIRC2	.	synonymous SNV	BIRC2:NM_001166:exon5:c.A1101T:p.G367G,BIRC2:NM_001256163:exon5:c.A1101T:p.G367G,BIRC2:NM_001256166:exon5:c.A954T:p.G318G	.	.	.	.	.	.	.	.	.	.	.	.	.	.	.	Iossifov;SSC_Iossifov_2014	12441.s1	;12441		;12441.fa	;12441.mo	;Female	NA	NA	NA
861	1138-1||11_1024924_G_C	exome	NDD	schizophrenia	11_1024924_G_C	11	1024924	G	C	4588	MUC6	-	CDS			exonic	MUC6	.	nonsynonymous SNV	MUC6:NM_005961:exon24:c.C3145G:p.L1049V	T	P	B	U	N	L	T	N	T	T	T	N	10.31	0.152	0.981	Fromer2014	1138-1						NA	NA	NA
862	kx||11_102565696_A_G	exome	NDD	EE	11_102565696_A_G	11	102565696	A	G	64066	MMP27	-	intron			splicing	MMP27	NM_022122:exon7:c.1033+2T>C	.	.	.	.	.	.	D	.	.	.	.	.	.	D	25	1.199	0.924	Heyne_2018	kx		simplex			female	NA	NA	NA
863	2263-1||11_1025827_C_T	exome	NDD	schizophrenia	11_1025827_C_T	11	1025827	C	T	4588	MUC6	-	CDS			exonic	MUC6	.	nonsynonymous SNV	MUC6:NM_005961:exon22:c.G2777A:p.R926Q	D	D	D	U	N	M	T	N	T	T	D	N	23.1	0.739	0.014	Fromer2014	2263-1						NA	NA	NA
864	12653.s1||11_102586117_A_G	exome	control	control	11_102586117_A_G	11	102586117	A	G	4317	MMP8	-	CDS			exonic	MMP8	.	synonymous SNV	MMP8:NM_002424:exon7:c.T954C:p.I318I,MMP8:NM_001304441:exon8:c.T885C:p.I295I,MMP8:NM_001304442:exon8:c.T885C:p.I295I	.	.	.	.	.	.	.	.	.	.	.	.	.	.	.	Iossifov;Satterstrom2020	12653.s1	;12653		;SSC06127	;SSC06121	;Female	NA	NA	NA
865	12534.p1||11_102593283_G_A	exome	NDD	autism	11_102593283_G_A	11	102593283	G	A	4317	MMP8	-	CDS			exonic	MMP8	.	nonsynonymous SNV	MMP8:NM_002424:exon2:c.C224T:p.T75M,MMP8:NM_001304441:exon3:c.C155T:p.T52M,MMP8:NM_001304442:exon3:c.C155T:p.T52M	D	D	D	D	D	H	T	D	D	D	D	D	33	0.953	0.084	Iossifov;Satterstrom2020	12534.p1	;12534		;SSC05083	;SSC05080	;Female	NA	NA	NA
866	TAS_F3012Y||11_1026085_C_T	exome	NDD	autism	11_1026085_C_T	11	1026085	C	T	4588	MUC6	-	CDS			exonic	MUC6	.	nonsynonymous SNV	MUC6:NM_005961:exon21:c.G2603A:p.C868Y	D	D	D	.	D	H	D	D	D	D	D	D	23.2	0.739	0.206	Satterstrom2020	TAS_F3012Y	TAS_F3012Y		TAS_F3012YA	TAS_F3012YB	Male	NA	NA	NA
867	AU151A||11_102663494_G_A	exome	NDD	autism	11_102663494_G_A	11	102663494	G	A	4312	MMP1	-	intron			ncRNA_intronic	WTAPP1	.	.	.	.	.	.	.	.	.	.	.	.	.	.	.	.	.	.	Satterstrom2020	AU151A	AU151A		AU151B	AU151C	Male	NA	NA	NA
868	G01-GEA-133-HI||11_102668173_C_G	exome	NDD	autism	11_102668173_C_G	11	102668173	C	G	4312	MMP1	-	CDS||5'UTR			exonic	MMP1	.	nonsynonymous SNV	MMP1:NM_002421:exon2:c.G164C:p.R55T	T	B	B	U	N	L	T	N	T	T	T	N	0.64	-0.319	0	Satterstrom2020	G01-GEA-133-HI	G01-GEA-133-HI		G01-GEA-132-PA	G01-GEA-132-MA	Male	NA	NA	NA
869	12568.p1||11_102709861_T_G	exome	NDD	ASD;autism	11_102709861_T_G	11	102709861	T	G	4314	MMP3	-	CDS			exonic	MMP3	.	nonsynonymous SNV	MMP3:NM_002422:exon7:c.A1049C:p.D350A	D	D	D	N	D	M	T	D	T	T	T	D	26.1	1.061	0.903	Heyne_2018;Satterstrom2020	12568.p1	;12568	simplex;	;12568.fa	;12568.mo	male;Male	NA	NA	NA
870	11957.p1||11_1027790_C_T	exome	NDD	autism	11_1027790_C_T	11	1027790	C	T	4588	MUC6	-	CDS			exonic	MUC6	.	nonsynonymous SNV	MUC6:NM_005961:exon16:c.G1876A:p.E626K	T	D	P	U	N	L	T	D	T	T	D	D	24	0.892	0.951	Iossifov;Satterstrom2020	11957.p1	;11957		;SSC04250	;SSC04246	;Male	NA	NA	NA
871	12651.p1||11_103006497_A_G	exome	NDD	autism	11_103006497_A_G	11	103006497	A	G	79659	DYNC2H1	+	CDS			exonic	DYNC2H1	.	synonymous SNV	DYNC2H1:NM_001080463:exon17:c.A2394G:p.K798K,DYNC2H1:NM_001377:exon17:c.A2394G:p.K798K	.	.	.	.	.	.	.	.	.	.	.	.	.	.	.	Satterstrom2020	12651.p1	12651		SSC06677	SSC06665	Male	NA	NA	NA
872	11736.s1||11_103024187_A_C	exome	control	control	11_103024187_A_C	11	103024187	A	C	79659	DYNC2H1	+	CDS			exonic	DYNC2H1	.	nonsynonymous SNV	DYNC2H1:NM_001080463:exon22:c.A3252C:p.K1084N,DYNC2H1:NM_001377:exon22:c.A3252C:p.K1084N	D	D	P	U	D	M	T	D	T	T	D	D	24.7	0.149	0.999	Satterstrom2020	11736.s1	11736		68642	68644	Female	NA	NA	NA
873	13455.p1||11_103026257_A_G	exome	NDD	autism	11_103026257_A_G	11	103026257	A	G	79659	DYNC2H1	+	intron			intronic	DYNC2H1	.	.	.	.	.	.	.	.	.	.	.	.	.	.	.	.	.	.	Satterstrom2020	13455.p1	13455		13455.fa	13455.mo	Female	NA	NA	NA
874	11445.p1||11_103075511_A_C	exome	NDD	autism	11_103075511_A_C	11	103075511	A	C	79659	DYNC2H1	+	intron			intronic	DYNC2H1	.	.	.	.	.	.	.	.	.	.	.	.	.	.	.	.	.	.	Satterstrom2020	11445.p1	11445		68569	68571	Male	NA	NA	NA
875	DDDP109899||11_103082669_G_A	exome	NDD	DD	11_103082669_G_A	11	103082669	G	A	79659	DYNC2H1	+	CDS			exonic	DYNC2H1	.	synonymous SNV	DYNC2H1:NM_001080463:exon54:c.G8691A:p.L2897L,DYNC2H1:NM_001377:exon54:c.G8691A:p.L2897L	.	.	.	.	.	.	.	.	.	.	.	.	.	.	.	Heyne_2018	DDDP109899		simplex			male	NA	NA	NA
876	DDDP107668||11_103093704_G_A	exome	NDD	DD	11_103093704_G_A	11	103093704	G	A	79659	DYNC2H1	+	CDS			exonic	DYNC2H1	.	nonsynonymous SNV	DYNC2H1:NM_001080463:exon59:c.G9242A:p.R3081H,DYNC2H1:NM_001377:exon59:c.G9242A:p.R3081H	D	D	D	D	D	M	T	D	D	D	D	D	35	1.048	0.998	Heyne_2018	DDDP107668		simplex			female	NA	NA	NA
877	DDDP101457||11_103106494_C_T	exome	NDD	DD	11_103106494_C_T	11	103106494	C	T	79659	DYNC2H1	+	CDS			exonic	DYNC2H1	.	synonymous SNV	DYNC2H1:NM_001080463:exon62:c.C9661T:p.L3221L,DYNC2H1:NM_001377:exon62:c.C9661T:p.L3221L	.	.	.	.	.	.	.	.	.	.	.	.	.	.	.	Heyne_2018	DDDP101457		simplex			male	NA	NA	NA
878	DDDP102615||11_103126224_G_A	exome	NDD	DD	11_103126224_G_A	11	103126224	G	A	79659	DYNC2H1	+	CDS			exonic	DYNC2H1	.	synonymous SNV	DYNC2H1:NM_001377:exon67:c.G10287A:p.K3429K,DYNC2H1:NM_001080463:exon68:c.G10308A:p.K3436K	.	.	.	.	.	.	.	.	.	.	.	.	.	.	.	Heyne_2018	DDDP102615		simplex			male	NA	NA	NA
879	270||11_103173966_G_A	exome	NDD	ID	11_103173966_G_A	11	103173966	G	A	79659	DYNC2H1	+	CDS			exonic	DYNC2H1	.	nonsynonymous SNV	DYNC2H1:NM_001377:exon76:c.G11240A:p.G3747E,DYNC2H1:NM_001080463:exon77:c.G11261A:p.G3754E	T	B	B	N	D	N	T	N	T	T	T	D	1.837	0.956	0.811	Heyne_2018	270		simplex			male	NA	NA	NA
880	Lelieveld_270||11_103173966_G_A	exome	NDD	ID	11_103173966_G_A	11	103173966	G	A	79659	DYNC2H1	+	CDS			exonic	DYNC2H1	.	nonsynonymous SNV	DYNC2H1:NM_001377:exon76:c.G11240A:p.G3747E,DYNC2H1:NM_001080463:exon77:c.G11261A:p.G3754E	T	B	B	N	D	N	T	N	T	T	T	D	1.837	0.956	0.811	Lelieveld2016	Lelieveld_270						NA	NA	NA
881	F04||11_103350097_T_G	exome	NDD	tourette_syndrome	11_103350097_T_G	11	103350097	T	G	79659	DYNC2H1	+	3'UTR			UTR3	DYNC2H1	NM_001377:c.*116T>G;NM_001080463:c.*116T>G	.	.	.	.	.	.	.	.	.	.	.	.	.	.	.	.	.	Eriguchi2017	F04						NA	NA	NA
882	13092.p1||11_103780457_A_G	exome	NDD	autism;ASD	11_103780457_A_G	11	103780457	A	G	80310	PDGFD	-	CDS			exonic	PDGFD	.	nonsynonymous SNV	PDGFD:NM_025208:exon7:c.T1078C:p.C360R,PDGFD:NM_033135:exon7:c.T1060C:p.C354R	D	D	D	D	D	M	T	D	T	T	D	D	27.5	1.199	0.945	Iossifov;Heyne_2018;Satterstrom2020	13092.p1	;13092	;simplex	;SSC06537	;SSC06529	;male;Male	NA	NA	NA
883	DDDP108210||11_103908677_A_G	exome	NDD	DD	11_103908677_A_G	11	103908677	A	G	414301	DDI1	+	CDS			exonic	DDI1	.	nonsynonymous SNV	DDI1:NM_001001711:exon1:c.A1127G:p.Q376R	T	B	B	N	D	L	T	N	T	T	T	D	1.156	1.199	0.016	Heyne_2018	DDDP108210		simplex			male	NA	NA	NA
884	20-0421654-08||11_104763735_A_T	exome	NDD	autism	11_104763735_A_T	11	104763735	A	T	100506742	CASP12	-	intron			intronic	CASP12	.	.	.	.	.	.	.	.	.	.	.	.	.	.	.	.	.	.	Satterstrom2020	20-0421654-08	20-0421654-08		19-982034-10	19-982035-11	Female	NA	NA	NA
885	DDDP111734||11_104872840_C_G	exome	NDD	DD	11_104872840_C_G	11	104872840	C	G	838	CASP5	-	CDS||5'UTR			exonic	CASP5	.	nonsynonymous SNV	CASP5:NM_001136110:exon3:c.G206C:p.G69A,CASP5:NM_001136109:exon4:c.G458C:p.G153A,CASP5:NM_001136112:exon5:c.G671C:p.G224A,CASP5:NM_004347:exon5:c.G632C:p.G211A	D	D	D	D	D	H	T	D	T	T	D	D	23.3	0.041	0.004	Heyne_2018	DDDP111734		simplex			female	NA	NA	NA
886	11516.p1||11_104905021_G_A	exome	NDD	autism	11_104905021_G_A	11	104905021	G	A	834	CASP1	-	CDS||5'UTR			exonic	CASP1	.	nonsynonymous SNV	CASP1:NM_001223:exon2:c.C188T:p.P63L,CASP1:NM_001257118:exon2:c.C188T:p.P63L,CASP1:NM_001257119:exon2:c.C188T:p.P63L,CASP1:NM_033292:exon2:c.C188T:p.P63L	T	B	B	N	N	L	T	N	T	T	T	N	1.343	-1.789	0	Iossifov;Satterstrom2020	11516.p1	;11516		;SSC00937	;SSC00938	;Male	NA	NA	NA
887	14442.s1||11_10540638_C_T	exome	control	control	11_10540638_C_T	11	10540638	C	T	50862	RNF141	-	CDS			exonic	RNF141	.	nonsynonymous SNV	RNF141:NM_016422:exon5:c.G485A:p.R162Q	T	B	B	D	D	N	T	N	T	T	T	D	23.9	0.935	0.858	Iossifov;Satterstrom2020	14442.s1	;14442		;SSC11671	;SSC11665	;Male	NA	NA	NA
888	DDDP100082||11_105925050_C_G	exome	NDD	DD	11_105925050_C_G	11	105925050	C	G	143879	KBTBD3	-	CDS			exonic	KBTBD3	.	synonymous SNV	KBTBD3:NM_001330359:exon3:c.G129C:p.V43V,KBTBD3:NM_152433:exon3:c.G366C:p.V122V,KBTBD3:NM_198439:exon4:c.G366C:p.V122V	.	.	.	.	.	.	.	.	.	.	.	.	.	.	.	Heyne_2018	DDDP100082		simplex			female	NA	NA	NA
889	14167.p1||11_105950458_C_T	exome	NDD	autism	11_105950458_C_T	11	105950458	C	T	60496	AASDHPPT	+	intron			intronic	AASDHPPT	.	.	.	.	.	.	.	.	.	.	.	.	.	.	.	.	.	.	Satterstrom2020	14167.p1	14167		SSC09663	SSC09656	Male	NA	NA	NA
890	60882100||11_10647583_G_C	exome	NDD	tourette_syndrome	11_10647583_G_C	11	10647583	G	C	10335	MRVI1	-	CDS			exonic	MRVI1	.	nonsynonymous SNV	MRVI1:NM_001206881:exon7:c.C353G:p.A118G,MRVI1:NM_001098579:exon8:c.C1274G:p.A425G,MRVI1:NM_001100163:exon9:c.C1025G:p.A342G,MRVI1:NM_001100167:exon9:c.C353G:p.A118G,MRVI1:NM_130385:exon9:c.C1298G:p.A433G	T	B	B	N	N	L	T	N	T	T	T	N	12.83	1.048	0.903	Willsey2017	60882100						NA	NA	NA
891	13757.p1||11_10651133_T_G	exome	NDD	autism	11_10651133_T_G	11	10651133	T	G	10335	MRVI1	-	CDS||5'UTR			exonic	MRVI1	.	nonsynonymous SNV	MRVI1:NM_001098579:exon4:c.A499C:p.T167P,MRVI1:NM_001100163:exon5:c.A253C:p.T85P,MRVI1:NM_001206880:exon5:c.A526C:p.T176P,MRVI1:NM_130385:exon5:c.A526C:p.T176P	D	P	B	N	D	M	T	N	T	T	T	D	24.8	1.061	1	Satterstrom2020	13757.p1	13757		6269	6289	Female	NA	NA	NA
892	DDDP104943||11_106617294_C_T	exome	NDD	DD	11_106617294_C_T	11	106617294	C	T	2977	GUCY1A2	-	CDS			exonic	GUCY1A2	.	nonsynonymous SNV	GUCY1A2:NM_001256424:exon7:c.G1912A:p.D638N	T	B	B	.	N	.	D	N	T	T	D	N	9.202	0.7	0.007	Heyne_2018	DDDP104943		simplex			female	NA	NA	NA
893	14522.s1||11_107207297_G_A	exome	control	control	11_107207297_G_A	11	107207297	G	A	143884	CWF19L2	-	CDS			exonic	CWF19L2	.	nonsynonymous SNV	CWF19L2:NM_152434:exon15:c.C2345T:p.P782L	D	D	D	D	D	H	T	D	T	T	D	D	32	0.953	1	Satterstrom2020	14522.s1	14522		36768	36770	Female	NA	NA	NA
894	781|Lelieveld_781||11_107375742_C_T	exome	NDD	ID;ID	11_107375742_C_T	11	107375742	C	T	91801	ALKBH8	-	CDS			exonic	ALKBH8	.	nonsynonymous SNV	ALKBH8:NM_001301010:exon12:c.G1646A:p.R549H,ALKBH8:NM_138775:exon12:c.G1637A:p.R546H	T	B	B	N	N	N	T	N	T	T	T	N	13.43	-0.226	0.001	Heyne_2018;Lelieveld2016	781|Lelieveld_781		simplex;			female;	NA	NA	NA
895	DDDP114281||11_107424597_T_A	exome	NDD	DD	11_107424597_T_A	11	107424597	T	A	91801	ALKBH8	-	CDS			exonic	ALKBH8	.	nonsynonymous SNV	ALKBH8:NM_001301010:exon4:c.A484T:p.T162S,ALKBH8:NM_138775:exon4:c.A475T:p.T159S	T	B	B	N	N	N	T	N	T	T	T	D	0.22	1.011	0.995	Heyne_2018	DDDP114281		simplex			female	NA	NA	NA
896	NDAR_INVRW542MKN_wes1||11_107462749_G_C	exome	NDD	autism	11_107462749_G_C	11	107462749	G	C	55531	ELMOD1	+	intron			intronic	ELMOD1	.	.	.	.	.	.	.	.	.	.	.	.	.	.	.	.	.	.	De_Rubeis_2014	NDAR_INVRW542MKN_wes1	NDAR_INVRW542MKN_wes1		NDAR_INVKF045DBD_wes1	NDAR_INVAM774DWJ_wes1	Male	NA	NA	NA
897	592||11_1075754_C_T	exome	NDD	ID	11_1075754_C_T	11	1075754	C	T	4583	MUC2	+	CDS			exonic	MUC2	.	synonymous SNV	MUC2:NM_002457:exon2:c.C180T:p.D60D	.	.	.	.	.	.	.	.	.	.	.	.	.	.	.	Heyne_2018	592		simplex			male	NA	NA	NA
898	Lelieveld_592||11_1075754_C_T	exome	NDD	ID	11_1075754_C_T	11	1075754	C	T	4583	MUC2	+	CDS			exonic	MUC2	.	synonymous SNV	MUC2:NM_002457:exon2:c.C180T:p.D60D	.	.	.	.	.	.	.	.	.	.	.	.	.	.	.	Lelieveld2016	Lelieveld_592						NA	NA	NA
899	DDDP102085||11_10774217_A_C	exome	NDD	DD	11_10774217_A_C	11	10774217	A	C	9646	CTR9	+	intron			splicing	CTR9	NM_014633:exon2:c.46-2A>C;NM_001346279:exon2:c.46-2A>C	.	.	.	.	.	.	D	.	.	.	.	.	.	D	25	1.199	1	Heyne_2018	DDDP102085		simplex			male	NA	NA	NA
900	667|Lelieveld_667||11_10785975_G_A	exome	NDD	ID;ID	11_10785975_G_A	11	10785975	G	A	9646	CTR9	+	CDS			exonic	CTR9	.	nonsynonymous SNV	CTR9:NM_001346279:exon11:c.G1405A:p.E469K,CTR9:NM_014633:exon11:c.G1405A:p.E469K	T	P	B	D	D	L	D	N	D	D	D	D	24.8	1.048	0.991	Heyne_2018;Lelieveld2016	667|Lelieveld_667		simplex;			female;	NA	NA	NA
901	DDDP118637||11_1078599_C_T	exome	NDD	DD	11_1078599_C_T	11	1078599	C	T	4583	MUC2	+	CDS			exonic	MUC2	.	synonymous SNV	MUC2:NM_002457:exon6:c.C807T:p.A269A	.	.	.	.	.	.	.	.	.	.	.	.	.	.	.	Heyne_2018	DDDP118637		simplex			male	NA	NA	NA
902	DEASD_0274_001||11_10794110_C_T	exome	NDD	autism	11_10794110_C_T	11	10794110	C	T	9646	CTR9	+	CDS			exonic	CTR9	.	nonsynonymous SNV	CTR9:NM_001346279:exon19:c.C2416T:p.R806W,CTR9:NM_014633:exon20:c.C2488T:p.R830W	D	D	D	D	D	M	T	D	T	T	D	D	35	0.807	0.999	DeRubeis2014;Satterstrom2020	DEASD_0274_001	;DEASD_0274_001		;DEASD_0274_500	;DEASD_0274_600	;Female	NA	NA	NA
903	DDDP108275||11_10794137_C_T	exome	NDD	DD	11_10794137_C_T	11	10794137	C	T	9646	CTR9	+	CDS			exonic	CTR9	.	nonsynonymous SNV	CTR9:NM_001346279:exon19:c.C2443T:p.R815W,CTR9:NM_014633:exon20:c.C2515T:p.R839W	D	D	P	D	D	M	T	D	T	T	D	D	34	-0.055	0.961	Heyne_2018	DDDP108275		simplex			male	NA	NA	NA
904	11571.p1||11_107944174_G_A	exome	NDD	autism	11_107944174_G_A	11	107944174	G	A	8065	CUL5	+	CDS			exonic	CUL5	.	nonsynonymous SNV	CUL5:NM_003478:exon10:c.G1063A:p.V355I	T	P	B	D	D	M	T	N	T	T	T	D	25.4	1.048	0.999	Iossifov;SSC_Iossifov_2014	11571.p1	;11571		;11571.fa	;11571.mo	;Male	NA	NA	NA
905	12631.s1||11_108005093_C_T	exome	control	control	11_108005093_C_T	11	108005093	C	T	38	ACAT1	+	intron	SINE	1	intronic	ACAT1	.	.	.	.	.	.	.	.	.	.	.	.	.	.	.	.	.	.	Satterstrom2020	12631.s1	12631		SSC05283	SSC05279	Male	NA	NA	NA
906	DEASD_1024_001||11_108016967_A_G	exome	NDD	autism	11_108016967_A_G	11	108016967	A	G	38	ACAT1	+	CDS			exonic	ACAT1	.	synonymous SNV	ACAT1:NM_000019:exon11:c.A1044G:p.A348A	.	.	.	.	.	.	.	.	.	.	.	.	.	.	.	Satterstrom2020	DEASD_1024_001	DEASD_1024_001		DEASD_1024_500	DEASD_1024_600	Male	NA	NA	NA
907	DDDP101614||11_1080295_G_A	exome	NDD	DD	11_1080295_G_A	11	1080295	G	A	4583	MUC2	+	CDS			exonic	MUC2	.	nonsynonymous SNV	MUC2:NM_002457:exon8:c.G1015A:p.D339N	.	.	.	.	.	.	.	.	.	.	.	.	.	.	.	Heyne_2018	DDDP101614		simplex			male	NA	NA	NA
908	at||11_108031660_A_G	exome	NDD	EE	11_108031660_A_G	11	108031660	A	G	4863	NPAT	-	CDS			exonic	NPAT	.	nonsynonymous SNV	NPAT:NM_001321307:exon17:c.T4174C:p.S1392P,NPAT:NM_002519:exon17:c.T4153C:p.S1385P	D	B	B	N	D	L	T	N	T	T	T	D	24.3	1.199	0.965	Heyne_2018	at		simplex			female	NA	NA	NA
909	AU039A||11_108043794_T_G	exome	NDD	autism	11_108043794_T_G	11	108043794	T	G	4863	NPAT	-	CDS			exonic	NPAT	.	synonymous SNV	NPAT:NM_001321307:exon13:c.A1917C:p.S639S,NPAT:NM_002519:exon13:c.A1917C:p.S639S	.	.	.	.	.	.	.	.	.	.	.	.	.	.	.	DeRubeis2014;Satterstrom2020	AU039A	;AU039A		;AU039B	;AU039C	;Male	NA	NA	NA
910	02C09879||11_108123631_G_A	exome	NDD	autism	11_108123631_G_A	11	108123631	G	A	472	ATM	+	CDS			exonic	ATM	.	synonymous SNV	ATM:NM_000051:exon12:c.G1890A:p.V630V	.	.	.	.	.	.	.	.	.	.	.	.	.	.	.	Satterstrom2020	02C09879	02C09879		02C11359	02C09877	Female	NA	NA	NA
911	DDDP100247||11_108124581_G_A	exome	NDD	DD	11_108124581_G_A	11	108124581	G	A	472	ATM	+	CDS			exonic	ATM	.	nonsynonymous SNV	ATM:NM_000051:exon13:c.G1939A:p.E647K	D	B	B	D	N	M	T	N	T	T	T	D	24.4	1.048	1	Heyne_2018	DDDP100247		simplex			male	NA	NA	NA
912	67|Lelieveld_67||11_108150229_A_T	exome	NDD	ID;ID	11_108150229_A_T	11	108150229	A	T	472	ATM	+	CDS			exonic	ATM	.	nonsynonymous SNV	ATM:NM_000051:exon23:c.A3296T:p.D1099V	D	B	B	N	D	M	T	N	T	T	D	D	22.7	1.138	0.906	Heyne_2018;Lelieveld2016	67|Lelieveld_67		simplex;			female;	NA	NA	NA
913	25150.p1||11_108150280_A_G	exome	NDD	tourette_syndrome	11_108150280_A_G	11	108150280	A	G	472	ATM	+	CDS			exonic	ATM	.	nonsynonymous SNV	ATM:NM_000051:exon23:c.A3347G:p.Q1116R	D	D	D	D	D	M	T	N	D	D	D	D	23.3	1.138	1	Willsey2017	25150.p1						NA	NA	NA
914	F5832-1||11_108200960_C_T	exome	NDD	autism	11_108200960_C_T	11	108200960	C	T	472	ATM	+	CDS			exonic	ATM	.	stopgain	ATM:NM_000051:exon50:c.C7327T:p.R2443X	.	.	.	D	A	.	.	.	.	.	.	D	43	0.852	0.997	Satterstrom2020	F5832-1	F5832-1		F5832-3	F5832-2	Male	NA	NA	NA
915	08C76321||11_10820649_G_A	exome	NDD	autism	11_10820649_G_A	11	10820649	G	A	1982	EIF4G2	-	CDS			exonic	EIF4G2	.	nonsynonymous SNV	EIF4G2:NM_001042559:exon20:c.C2434T:p.R812C,EIF4G2:NM_001172705:exon21:c.C2548T:p.R850C,EIF4G2:NM_001418:exon21:c.C2548T:p.R850C	D	D	D	D	.	M	D	D	D	D	.	D	33	1.048	0.999	Satterstrom2020	08C76321	08C76321		08C76322	08C76323	Male	NA	NA	NA
916	NDAR_INVCH293VTH_wes1||11_10821664_T_C	exome	NDD	autism	11_10821664_T_C	11	10821664	T	C	1982	EIF4G2	-	CDS			exonic	EIF4G2	.	nonsynonymous SNV	EIF4G2:NM_001042559:exon17:c.A1978G:p.K660E,EIF4G2:NM_001172705:exon18:c.A2092G:p.K698E,EIF4G2:NM_001418:exon18:c.A2092G:p.K698E	D	P	B	D	.	M	T	D	T	T	.	D	23.8	1.061	1	DeRubeis2014;De_Rubeis_2014	NDAR_INVCH293VTH_wes1	;NDAR_INVCH293VTH_wes1		;NDAR_INVJX070HHK_wes1	;NDAR_INVVE713FWQ_wes1	;Male	NA	NA	NA
917	14343.p1||11_10821741_G_A	exome	NDD	autism;ASD	11_10821741_G_A	11	10821741	G	A	1982	EIF4G2	-	CDS			exonic	EIF4G2	.	nonsynonymous SNV	EIF4G2:NM_001042559:exon17:c.C1901T:p.P634L,EIF4G2:NM_001172705:exon18:c.C2015T:p.P672L,EIF4G2:NM_001418:exon18:c.C2015T:p.P672L	D	D	D	D	.	M	T	D	T	T	.	D	33	1.048	1	Iossifov;Heyne_2018;Satterstrom2020	14343.p1	;14343	;simplex	;14343.fa	;14343.mo	;male;Male	NA	NA	NA
918	DDDP118628||11_10822137_C_T	exome	NDD	DD	11_10822137_C_T	11	10822137	C	T	1982	EIF4G2	-	CDS			exonic	EIF4G2	.	nonsynonymous SNV	EIF4G2:NM_001042559:exon16:c.G1588A:p.V530I,EIF4G2:NM_001172705:exon17:c.G1702A:p.V568I,EIF4G2:NM_001418:exon17:c.G1702A:p.V568I	T	B	B	D	.	M	T	N	T	T	.	D	12.99	0.935	0.998	Heyne_2018	DDDP118628		simplex			female	NA	NA	NA
919	16901||11_108381153_C_A	exome	NDD	EE	11_108381153_C_A	11	108381153	C	A	23086	EXPH5	-	CDS			exonic	EXPH5	.	nonsynonymous SNV	EXPH5:NM_001144765:exon3:c.G4517T:p.S1506I,EXPH5:NM_001144764:exon4:c.G4613T:p.S1538I,EXPH5:NM_001144763:exon6:c.G4853T:p.S1618I,EXPH5:NM_015065:exon6:c.G5081T:p.S1694I,EXPH5:NM_001308019:exon7:c.G5060T:p.S1687I	T	D	P	N	N	L	T	N	T	T	T	N	20.5	0.935	0.202	Heyne_2018	16901		simplex			male	NA	NA	NA
920	DEASD_0312_001||11_108381396_C_A	exome	NDD	autism	11_108381396_C_A	11	108381396	C	A	23086	EXPH5	-	CDS			exonic	EXPH5	.	nonsynonymous SNV	EXPH5:NM_001144765:exon3:c.G4274T:p.R1425I,EXPH5:NM_001144764:exon4:c.G4370T:p.R1457I,EXPH5:NM_001144763:exon6:c.G4610T:p.R1537I,EXPH5:NM_015065:exon6:c.G4838T:p.R1613I,EXPH5:NM_001308019:exon7:c.G4817T:p.R1606I	D	D	D	D	D	M	T	D	T	T	D	D	32	0.935	1	DeRubeis2014;Satterstrom2020	DEASD_0312_001	;DEASD_0312_001		;DEASD_0312_500	;DEASD_0312_600	;Male	NA	NA	NA
921	09C84897||11_108385143_T_C	exome	NDD	autism	11_108385143_T_C	11	108385143	T	C	23086	EXPH5	-	CDS			exonic	EXPH5	.	nonsynonymous SNV	EXPH5:NM_001144765:exon3:c.A527G:p.K176R,EXPH5:NM_001144764:exon4:c.A623G:p.K208R,EXPH5:NM_001144763:exon6:c.A863G:p.K288R,EXPH5:NM_015065:exon6:c.A1091G:p.K364R,EXPH5:NM_001308019:exon7:c.A1070G:p.K357R	T	P	P	D	N	L	T	N	T	T	T	D	22.2	0.913	0.9	Satterstrom2020	09C84897	09C84897		09C84896	09C84895	Female	NA	NA	NA
922	aip||11_108385597_C_T	exome	NDD	EE	11_108385597_C_T	11	108385597	C	T	23086	EXPH5	-	CDS			exonic	EXPH5	.	nonsynonymous SNV	EXPH5:NM_001144765:exon3:c.G73A:p.D25N,EXPH5:NM_001144764:exon4:c.G169A:p.D57N,EXPH5:NM_001144763:exon6:c.G409A:p.D137N,EXPH5:NM_015065:exon6:c.G637A:p.D213N,EXPH5:NM_001308019:exon7:c.G616A:p.D206N	D	D	D	D	D	M	T	D	T	T	T	D	27.8	0.852	1	Heyne_2018	aip		simplex			female	NA	NA	NA
923	11391.p1||11_1084364_C_T	exome	NDD	autism	11_1084364_C_T	11	1084364	C	T	4583	MUC2	+	CDS			exonic	MUC2	.	synonymous SNV	MUC2:NM_002457:exon19:c.C2496T:p.G832G	.	.	.	.	.	.	.	.	.	.	.	.	.	.	.	Iossifov;Satterstrom2020	11391.p1	;11391		;11391.fa	;11391.mo	;Male	NA	NA	NA
924	08C77419||11_1084372_T_C	exome	NDD	autism	11_1084372_T_C	11	1084372	T	C	4583	MUC2	+	CDS			exonic	MUC2	.	nonsynonymous SNV	MUC2:NM_002457:exon19:c.T2504C:p.I835T	.	.	.	.	.	.	.	.	.	.	.	.	.	.	.	Satterstrom2020	08C77419	08C77419		08C78286	08C78287	Male	NA	NA	NA
925	13928.s1||11_10875290_A_G	exome	control	control	11_10875290_A_G	11	10875290	A	G	58486	ZBED5	-	CDS	DNA	1	exonic	ZBED5	.	synonymous SNV	ZBED5:NM_001143667:exon3:c.T1203C:p.Y401Y,ZBED5:NM_021211:exon3:c.T1203C:p.Y401Y	.	.	.	.	.	.	.	.	.	.	.	.	.	.	.	Iossifov;Satterstrom2020	13928.s1	;13928		;SSC09962	;SSC09949	;Female	NA	NA	NA
926	11441.p1||11_1090362_G_A	exome	NDD	autism	11_1090362_G_A	11	1090362	G	A	4583	MUC2	+	CDS			exonic	MUC2	.	nonsynonymous SNV	MUC2:NM_002457:exon27:c.G3658A:p.V1220I	.	.	.	.	.	.	.	.	.	.	.	.	.	.	.	Iossifov;Satterstrom2020	11441.p1	;11441		;SSC00596	;SSC00594	;Male	NA	NA	NA
927	14558.p1||11_1090971_C_T	exome	NDD	autism	11_1090971_C_T	11	1090971	C	T	4583	MUC2	+	CDS			exonic	MUC2	.	nonsynonymous SNV	MUC2:NM_002457:exon28:c.C3866T:p.P1289L	.	.	.	.	.	.	.	.	.	.	.	.	.	.	.	Iossifov;SSC_Iossifov_2014	14558.p1	;14558		;14558.fa	;14558.mo	;Male	NA	NA	NA
928	13175.s1||11_109294676_G_A	exome	control	control	11_109294676_G_A	11	109294676	G	A	399947	C11orf87	+	CDS			exonic	C11orf87	.	nonsynonymous SNV	C11orf87:NM_207645:exon2:c.G317A:p.C106Y	D	D	D	U	D	L	.	D	T	T	T	D	24	1.048	0.939	Satterstrom2020	13175.s1	13175		SSC06935	SSC06933	Female	NA	NA	NA
929	12782.p1||11_1093105_C_G	exome	NDD	autism	11_1093105_C_G	11	1093105	C	G	4583	MUC2	+	CDS	Simple_repeat	1	exonic	MUC2	.	nonsynonymous SNV	MUC2:NM_002457:exon31:c.C4924G:p.P1642A	.	.	.	.	.	.	.	.	.	.	.	.	.	.	.	Iossifov	12782.p1						NA	NA	NA
930	09C82566||11_1093562_C_G	exome	NDD	autism	11_1093562_C_G	11	1093562	C	G	4583	MUC2	+	CDS	Simple_repeat	1	exonic	MUC2	.	nonsynonymous SNV	MUC2:NM_002457:exon31:c.C5381G:p.T1794S	.	.	.	.	.	.	.	.	.	.	.	.	.	.	.	DeRubeis2014	09C82566						NA	NA	NA
931	09C90833||11_1093851_A_C	exome	NDD	autism	11_1093851_A_C	11	1093851	A	C	4583	MUC2	+	CDS			exonic	MUC2	.	synonymous SNV	MUC2:NM_002457:exon31:c.A5670C:p.P1890P	.	.	.	.	.	.	.	.	.	.	.	.	.	.	.	Satterstrom2020	09C90833	09C90833		09C90834	09C90835	Male	NA	NA	NA
932	14560.s1||11_1094679_G_A	exome	control	control	11_1094679_G_A	11	1094679	G	A	4583	MUC2	+	CDS			exonic	MUC2	.	nonsynonymous SNV	MUC2:NM_002457:exon32:c.G5767A:p.G1923S	.	.	.	.	.	.	.	.	.	.	.	.	.	.	.	Iossifov;Satterstrom2020	14560.s1	;14560		;36872	;36874	;Female	NA	NA	NA
933	158|Lelieveld_158||11_1098745_T_C	exome	NDD	ID;ID	11_1098745_T_C	11	1098745	T	C	4583	MUC2	+	CDS			exonic	MUC2	.	nonsynonymous SNV	MUC2:NM_002457:exon38:c.T7115C:p.L2372P	.	.	.	.	.	.	.	.	.	.	.	.	.	.	.	Heyne_2018;Lelieveld2016	158|Lelieveld_158		simplex;			female;	NA	NA	NA
934	567||11_110023763_G_A	exome	NDD	ID	11_110023763_G_A	11	110023763	G	A	85463	ZC3H12C	+	CDS			exonic	ZC3H12C	.	nonsynonymous SNV	ZC3H12C:NM_033390:exon3:c.G893A:p.R298Q	D	D	D	D	D	M	T	D	T	T	D	D	34	1.048	0.652	Heyne_2018	567		simplex			male	NA	NA	NA
935	Lelieveld_567||11_110023763_G_A	exome	NDD	ID	11_110023763_G_A	11	110023763	G	A	85463	ZC3H12C	+	CDS			exonic	ZC3H12C	.	nonsynonymous SNV	ZC3H12C:NM_033390:exon3:c.G893A:p.R298Q	D	D	D	D	D	M	T	D	T	T	D	D	34	1.048	0.652	Lelieveld2016	Lelieveld_567						NA	NA	NA
936	09C82560||11_1101090_G_A	exome	NDD	autism	11_1101090_G_A	11	1101090	G	A	4583	MUC2	+	CDS			exonic	MUC2	.	nonsynonymous SNV	MUC2:NM_002457:exon42:c.G7489A:p.V2497I	.	.	.	.	.	.	.	.	.	.	.	.	.	.	.	DeRubeis2014;Satterstrom2020	09C82560	;09C82560		;09C82558	;09C82559	;Male	NA	NA	NA
937	DDDP110882||11_110134912_A_G	exome	NDD	DD	11_110134912_A_G	11	110134912	A	G	5962	RDX	-	CDS			exonic	RDX	.	synonymous SNV	RDX:NM_001260496:exon4:c.T144C:p.F48F,RDX:NM_001260492:exon5:c.T240C:p.F80F,RDX:NM_001260493:exon5:c.T240C:p.F80F,RDX:NM_002906:exon5:c.T240C:p.F80F	.	.	.	.	.	.	.	.	.	.	.	.	.	.	.	Heyne_2018	DDDP110882		simplex			male	NA	NA	NA
938	12693.p1||11_1101883_G_A	exome	NDD	autism	11_1101883_G_A	11	1101883	G	A	4583	MUC2	+	intron			intronic	MUC2	.	.	.	.	.	.	.	.	.	.	.	.	.	.	.	.	.	.	Krumm;Satterstrom2020	12693.p1	;12693		;SSC04805	;SSC04800	;Male	NA	NA	NA
939	DDDP111306||11_1103891_C_T	exome	NDD	DD	11_1103891_C_T	11	1103891	C	T	4583	MUC2	+	CDS			exonic	MUC2	.	synonymous SNV	MUC2:NM_002457:exon49:c.C8190T:p.T2730T	.	.	.	.	.	.	.	.	.	.	.	.	.	.	.	Heyne_2018	DDDP111306		simplex			female	NA	NA	NA
940	11453.p1||11_1104228_G_A	exome	NDD	autism	11_1104228_G_A	11	1104228	G	A	4583	MUC2	+	CDS			exonic	MUC2	.	nonsynonymous SNV	MUC2:NM_002457:exon50:c.G8419A:p.A2807T	.	.	.	.	.	.	.	.	.	.	.	.	.	.	.	Iossifov;Satterstrom2020	11453.p1	;11453		;68578	;68580	;Male	NA	NA	NA
941	13557.p1||11_1104266_G_A	exome	NDD	autism	11_1104266_G_A	11	1104266	G	A	4583	MUC2	+	3'UTR			UTR3	MUC2	NM_002457:c.*3G>A	.	.	.	.	.	.	.	.	.	.	.	.	.	.	.	.	.	Satterstrom2020	13557.p1	13557		4833	4865	Male	NA	NA	NA
942	DDDP110890||11_110450999_A_C	exome	NDD	DD	11_110450999_A_C	11	110450999	A	C	57569	ARHGAP20	-	CDS			exonic	ARHGAP20	.	nonsynonymous SNV	ARHGAP20:NM_001258415:exon15:c.T2602G:p.L868V,ARHGAP20:NM_001258417:exon15:c.T2563G:p.L855V,ARHGAP20:NM_001258418:exon15:c.T2563G:p.L855V,ARHGAP20:NM_001258416:exon16:c.T2593G:p.L865V,ARHGAP20:NM_020809:exon16:c.T2671G:p.L891V	D	D	D	D	D	M	T	N	T	T	T	D	24.6	1.199	1	Heyne_2018	DDDP110890		simplex			male	NA	NA	NA
943	DDDP112039||11_110451877_G_A	exome	NDD	DD	11_110451877_G_A	11	110451877	G	A	57569	ARHGAP20	-	CDS			exonic	ARHGAP20	.	nonsynonymous SNV	ARHGAP20:NM_001258415:exon15:c.C1724T:p.A575V,ARHGAP20:NM_001258417:exon15:c.C1685T:p.A562V,ARHGAP20:NM_001258418:exon15:c.C1685T:p.A562V,ARHGAP20:NM_001258416:exon16:c.C1715T:p.A572V,ARHGAP20:NM_020809:exon16:c.C1793T:p.A598V	D	P	B	D	D	L	T	N	T	T	T	D	11.98	0.046	0.864	Heyne_2018	DDDP112039		simplex			female	NA	NA	NA
944	14246.p1||11_111152129_G_A	exome	NDD	autism	11_111152129_G_A	11	111152129	G	A	341032	C11orf53	+	5'UTR			UTR5	C11orf53	NM_198498:c.-30G>A	.	.	.	.	.	.	.	.	.	.	.	.	.	.	.	.	.	Iossifov;Satterstrom2020	14246.p1	;14246		;SSC11135	;SSC11120	;Male	NA	NA	NA
945	DDDP118172||11_111591720_G_A	exome	NDD	DD	11_111591720_G_A	11	111591720	G	A	23235	SIK2	+	CDS			exonic	SIK2	.	synonymous SNV	SIK2:NM_015191:exon12:c.G1878A:p.P626P	.	.	.	.	.	.	.	.	.	.	.	.	.	.	.	Heyne_2018	DDDP118172		simplex			male	NA	NA	NA
946	25319.p1||11_111612833_T_G	exome	NDD	tourette_syndrome	11_111612833_T_G	11	111612833	T	G	5519	PPP2R1B	-	CDS			exonic	PPP2R1B	.	nonsynonymous SNV	PPP2R1B:NM_001177563:exon12:c.A1352C:p.K451T,PPP2R1B:NM_181700:exon12:c.A1541C:p.K514T,PPP2R1B:NM_001177562:exon13:c.A1598C:p.K533T,PPP2R1B:NM_002716:exon14:c.A1733C:p.K578T,PPP2R1B:NM_181699:exon14:c.A1733C:p.K578T	T	B	B	D	D	M	T	D	T	T	D	D	14.2	1.011	0.995	Willsey2017	25319.p1						NA	NA	NA
947	11484.p1||11_111626054_G_A	exome	NDD	autism	11_111626054_G_A	11	111626054	G	A	5519	PPP2R1B	-	CDS			exonic	PPP2R1B	.	nonsynonymous SNV	PPP2R1B:NM_001177563:exon4:c.C427T:p.R143C,PPP2R1B:NM_181700:exon4:c.C616T:p.R206C,PPP2R1B:NM_001177562:exon6:c.C808T:p.R270C,PPP2R1B:NM_002716:exon6:c.C808T:p.R270C,PPP2R1B:NM_181699:exon6:c.C808T:p.R270C	D	D	D	D	D	H	T	D	T	T	D	D	33	0.097	0.996	Iossifov;Satterstrom2020	11484.p1	;11484		;SSC02711	;SSC02693	;Male	NA	NA	NA
948	11355.s1||11_111630612_C_G	exome	control	control	11_111630612_C_G	11	111630612	C	G	5519	PPP2R1B	-	CDS			exonic	PPP2R1B	.	nonsynonymous SNV	PPP2R1B:NM_181700:exon3:c.G411C:p.L137F,PPP2R1B:NM_001177562:exon5:c.G603C:p.L201F,PPP2R1B:NM_002716:exon5:c.G603C:p.L201F,PPP2R1B:NM_181699:exon5:c.G603C:p.L201F	D	P	P	D	D	M	T	D	T	T	D	D	26.1	0.935	0.999	Iossifov;SSC_Iossifov_2014	11355.s1	;11355		;11355.fa	;11355.mo	;Female	NA	NA	NA
949	AC03-1004-01||11_111631749_C_A	exome	NDD	autism	11_111631749_C_A	11	111631749	C	A	5519	PPP2R1B	-	CDS			exonic	PPP2R1B	.	synonymous SNV	PPP2R1B:NM_181700:exon2:c.G141T:p.V47V,PPP2R1B:NM_001177562:exon4:c.G333T:p.V111V,PPP2R1B:NM_002716:exon4:c.G333T:p.V111V,PPP2R1B:NM_181699:exon4:c.G333T:p.V111V	.	.	.	.	.	.	.	.	.	.	.	.	.	.	.	DeRubeis2014;Satterstrom2020	AC03-1004-01	;AC03-1004-01		;AC03-1004-02	;AC03-1004-03	;Male	NA	NA	NA
950	11696.p1||11_111784275_C_T	exome	NDD	autism	11_111784275_C_T	11	111784275	C	T	100528019	HSPB2-C11orf52	+	CDS			exonic	HSPB2	.	nonsynonymous SNV	HSPB2:NM_001541:exon2:c.C205T:p.L69F	T	D	P	N	D	L	D	N	D	D	D	D	22.9	0.935	0.998	Iossifov;Satterstrom2020	11696.p1	;11696		;5365	;5397	;Male	NA	NA	NA
951	12081.p1||11_111789736_G_A	exome	NDD	autism	11_111789736_G_A	11	111789736	G	A	91894	C11orf52	+	intron			ncRNA_intronic	HSPB2-C11orf52	.	.	.	.	.	.	.	.	.	.	.	.	.	.	.	.	.	.	Iossifov;Satterstrom2020	12081.p1	;12081		;SSC03632	;SSC03626	;Male	NA	NA	NA
952	ASC_CA_105_A||11_111866246_G_C	exome	NDD	autism	11_111866246_G_C	11	111866246	G	C	85458	DIXDC1	+	CDS			exonic	DIXDC1	.	unknown	UNKNOWN	.	B	B	D	D	.	.	.	T	T	T	D	16.47	1.048	1	Satterstrom2020	ASC_CA_105_A	ASC_CA_105_A		ASC_CA_105_P	ASC_CA_105_M	Female	NA	NA	NA
953	14011.p1||11_111933213_C_T	exome	NDD	autism	11_111933213_C_T	11	111933213	C	T	1737	DLAT	+	CDS			exonic	DLAT	.	nonsynonymous SNV	DLAT:NM_001931:exon14:c.C1898T:p.A633V	T	B	B	D	D	N	T	N	T	T	T	D	25.6	0.876	1	Krumm	14011.p1						NA	NA	NA
954	DDDP106780||11_112042598_C_T	exome	NDD	DD	11_112042598_C_T	11	112042598	C	T	56158	TEX12	+	CDS			exonic	TEX12	.	stopgain	TEX12:NM_031275:exon5:c.C331T:p.R111X	.	.	.	N	D	.	.	.	.	.	.	D	38	0.14	0.996	Heyne_2018	DDDP106780		simplex			female	NA	NA	NA
955	DDDP100305||11_112088511_G_T	exome	NDD	DD	11_112088511_G_T	11	112088511	G	T	83875	BCO2	+	CDS			exonic	BCO2	.	nonsynonymous SNV	BCO2:NM_001256398:exon10:c.G1435T:p.D479Y,BCO2:NM_001256400:exon11:c.G1339T:p.D447Y,BCO2:NM_001037290:exon12:c.G1552T:p.D518Y,BCO2:NM_001256397:exon12:c.G1534T:p.D512Y,BCO2:NM_031938:exon12:c.G1654T:p.D552Y	D	D	D	D	D	M	D	D	D	D	D	D	28.2	1.048	0.999	Heyne_2018	DDDP100305		simplex			female	NA	NA	NA
956	DDDP100340||11_11292807_G_A	exome	NDD	DD	11_11292807_G_A	11	11292807	G	A	374378	GALNTL4	-	CDS			exonic	GALNT18	.	nonsynonymous SNV	GALNT18:NM_198516:exon11:c.C1708T:p.R570C	D	B	B	D	D	M	T	D	T	T	D	D	25.8	0.951	1	Heyne_2018	DDDP100340		simplex			male	NA	NA	NA
957	12864.s1||11_113105792_G_T	exome	control	control	11_113105792_G_T	11	113105792	G	T	4684	NCAM1	+	CDS			exonic	NCAM1	.	nonsynonymous SNV	NCAM1:NM_000615:exon14:c.G1701T:p.K567N,NCAM1:NM_001076682:exon14:c.G1701T:p.K567N,NCAM1:NM_001242608:exon14:c.G1701T:p.K567N,NCAM1:NM_181351:exon15:c.G1731T:p.K577N,NCAM1:NM_001242607:exon16:c.G1809T:p.K603N	.	D	D	U	D	.	.	.	T	T	D	D	26.7	0.12	0.837	Iossifov;Satterstrom2020	12864.s1	;12864		;SSC06103	;SSC06097	;Female	NA	NA	NA
958	10C109077||11_113114295_G_C	exome	NDD	autism	11_113114295_G_C	11	113114295	G	C	4684	NCAM1	+	exon_unclassified			intronic	NCAM1	.	.	.	.	.	.	.	.	.	.	.	.	.	.	.	.	.	.	DeRubeis2014	10C109077						NA	NA	NA
959	12722.s1||11_113196288_A_T	exome	control	control	11_113196288_A_T	11	113196288	A	T	54970	TTC12	+	CDS||5'UTR			exonic	TTC12	.	nonsynonymous SNV	TTC12:NM_001318533:exon6:c.A365T:p.Y122F,TTC12:NM_017868:exon6:c.A365T:p.Y122F	T	D	D	D	D	N	T	D	T	T	T	D	13.61	1.088	0.02	Iossifov;Satterstrom2020	12722.s1	;12722		;SSC05361	;SSC05355	;Male	NA	NA	NA
960	DDDP101218||11_113222905_T_C	exome	NDD	DD	11_113222905_T_C	11	113222905	T	C	54970	TTC12	+	CDS			exonic	TTC12	.	synonymous SNV	TTC12:NM_001318533:exon16:c.T1440C:p.F480F,TTC12:NM_017868:exon16:c.T1422C:p.F474F	.	.	.	.	.	.	.	.	.	.	.	.	.	.	.	Heyne_2018	DDDP101218		simplex			male	NA	NA	NA
961	DEASD_0215_001||11_113270025_G_A	exome	NDD	autism	11_113270025_G_A	11	113270025	G	A	255239	ANKK1	+	CDS			exonic	ANKK1	.	nonsynonymous SNV	ANKK1:NM_178510:exon8:c.G1334A:p.R445H	D	D	D	N	N	L	T	D	T	T	T	N	20.4	-0.298	0.066	DeRubeis2014;Satterstrom2020	DEASD_0215_001	;DEASD_0215_001		;DEASD_0215_500	;DEASD_0215_600	;Male	NA	NA	NA
962	14330.p1||11_113270370_G_A	exome	NDD	autism	11_113270370_G_A	11	113270370	G	A	255239	ANKK1	+	CDS			exonic	ANKK1	.	nonsynonymous SNV	ANKK1:NM_178510:exon8:c.G1679A:p.G560D	D	P	P	N	N	M	T	D	T	T	T	D	18.93	0.908	0.063	Iossifov;Satterstrom2020	14330.p1	;14330		;14330.fa	;14330.mo	;Female	NA	NA	NA
963	08C75066||11_113270848_C_T	exome	NDD	autism	11_113270848_C_T	11	113270848	C	T	255239	ANKK1	+	CDS			exonic	ANKK1	.	synonymous SNV	ANKK1:NM_178510:exon8:c.C2157T:p.D719D	.	.	.	.	.	.	.	.	.	.	.	.	.	.	.	Satterstrom2020	08C75066	08C75066		08C75068	08C75067	Male	NA	NA	NA
964	25041.p1||11_113281543_C_T	exome	NDD	tourette_syndrome	11_113281543_C_T	11	113281543	C	T	1813	DRD2	-	CDS			exonic	DRD2	.	stopgain	DRD2:NM_016574:exon7:c.G1151A:p.W384X,DRD2:NM_000795:exon8:c.G1238A:p.W413X	.	.	.	D	D	.	.	.	.	.	.	D	46	0.935	1	Willsey2017	25041.p1						NA	NA	NA
965	DDDP111115||11_113295222_C_T	exome	NDD	DD	11_113295222_C_T	11	113295222	C	T	1813	DRD2	-	CDS			exonic	DRD2	.	nonsynonymous SNV	DRD2:NM_000795:exon2:c.G152A:p.G51D,DRD2:NM_016574:exon2:c.G152A:p.G51D	D	D	D	D	D	H	T	D	D	D	D	D	29.3	0.935	0.997	Heyne_2018	DDDP111115		simplex			female	NA	NA	NA
966	ct||11_113568121_G_A	exome	NDD	EE	11_113568121_G_A	11	113568121	G	A	80975	TMPRSS5	-	CDS||5'UTR			exonic	TMPRSS5	.	synonymous SNV	TMPRSS5:NM_001288749:exon4:c.C216T:p.S72S,TMPRSS5:NM_001288750:exon4:c.C216T:p.S72S,TMPRSS5:NM_001288751:exon5:c.C321T:p.S107S,TMPRSS5:NM_001288752:exon5:c.C348T:p.S116S,TMPRSS5:NM_030770:exon5:c.C348T:p.S116S	.	.	.	.	.	.	.	.	.	.	.	.	.	.	.	Heyne_2018	ct		simplex			female	NA	NA	NA
967	150474||11_113570740_C_G	exome	NDD	autism	11_113570740_C_G	11	113570740	C	G	80975	TMPRSS5	-	CDS			exonic	TMPRSS5	.	nonsynonymous SNV	TMPRSS5:NM_001288751:exon2:c.G23C:p.R8T	D	B	B	.	N	.	D	N	T	T	D	N	9.211	0.805	0.017	Satterstrom2020	150474	150474		150475	150476	Female	NA	NA	NA
968	14239.p1||11_113614511_C_G	exome	NDD	autism	11_113614511_C_G	11	113614511	C	G	9183	ZW10	-	intron			intronic	ZW10	.	.	.	.	.	.	.	.	.	.	.	.	.	.	.	.	.	.	Iossifov;Satterstrom2020	14239.p1	;14239		;14239.fa	;14239.mo	;Male	NA	NA	NA
969	11474.s1||11_113631634_G_A	exome	control	control	11_113631634_G_A	11	113631634	G	A	9183	ZW10	-	CDS			exonic	ZW10	.	nonsynonymous SNV	ZW10:NM_004724:exon3:c.C247T:p.R83W	D	D	P	N	D	L	T	D	T	T	D	D	29.6	0.092	0.95	Satterstrom2020	11474.s1	11474		SSC00139	SSC00138	Male	NA	NA	NA
970	NDAR_INVGG001GYA_wes1||11_113675699_G_A	exome	control	control	11_113675699_G_A	11	113675699	G	A	57646	USP28	-	CDS			exonic	USP28	.	stopgain	USP28:NM_001346268:exon16:c.C1471T:p.R491X,USP28:NM_001301029:exon17:c.C1999T:p.R667X,USP28:NM_001346259:exon18:c.C2296T:p.R766X,USP28:NM_001346260:exon18:c.C2098T:p.R700X,USP28:NM_001346261:exon18:c.C2095T:p.R699X,USP28:NM_001346262:exon18:c.C1999T:p.R667X,USP28:NM_001346267:exon18:c.C1471T:p.R491X,USP28:NM_001346272:exon18:c.C1318T:p.R440X,USP28:NM_001346257:exon19:c.C2392T:p.R798X,USP28:NM_001…	.	.	.	D	A	.	.	.	.	.	.	D	45	1.048	0.999	De_Rubeis_2014	NDAR_INVGG001GYA_wes1	NDAR_INVGG001GYA_wes1		NDAR_INVJY806FHX_wes1	NDAR_INVUZ941NBY_wes1	Female	NA	NA	NA
971	F10245-1||11_113698074_A_T	exome	NDD	autism	11_113698074_A_T	11	113698074	A	T	57646	USP28	-	CDS||5'UTR			exonic	USP28	.	nonsynonymous SNV	USP28:NM_001346268:exon7:c.T69A:p.F23L,USP28:NM_001301029:exon9:c.T693A:p.F231L,USP28:NM_001346260:exon9:c.T696A:p.F232L,USP28:NM_001346261:exon9:c.T693A:p.F231L,USP28:NM_001346264:exon9:c.T69A:p.F23L,USP28:NM_001346267:exon9:c.T69A:p.F23L,USP28:NM_001346253:exon10:c.T990A:p.F330L,USP28:NM_001346257:exon10:c.T990A:p.F330L,USP28:NM_001346259:exon10:c.T990A:p.F330L,USP28:NM_001346262:exon10:c.T693A…	D	D	D	D	D	M	T	D	T	T	T	D	31	1.199	1	Satterstrom2020	F10245-1	F10245-1		F10245-3	F10245-2	Male	NA	NA	NA
972	1281012||11_113849999_G_A	exome	NDD	autism	11_113849999_G_A	11	113849999	G	A	3359	HTR3A	+	CDS			exonic	HTR3A	.	synonymous SNV	HTR3A:NM_000869:exon3:c.G282A:p.Q94Q,HTR3A:NM_001161772:exon3:c.G219A:p.Q73Q,HTR3A:NM_213621:exon3:c.G282A:p.Q94Q	.	.	.	.	.	.	.	.	.	.	.	.	.	.	.	Satterstrom2020	1281012	1281012		1291002	1296012	Female	NA	NA	NA
973	AU051A||11_11394085_C_T	exome	NDD	autism	11_11394085_C_T	11	11394085	C	T	374378	GALNTL4	-	CDS			exonic	GALNT18	.	nonsynonymous SNV	GALNT18:NM_198516:exon6:c.G1069A:p.E357K	D	D	D	D	D	H	T	D	D	D	D	D	29.3	0.935	0.965	DeRubeis2014;Satterstrom2020	AU051A	;AU051A		;AU051B	;AU051C	;Female	NA	NA	NA
974	12687.s1||11_114168803_G_A	exome	control	control	11_114168803_G_A	11	114168803	G	A	4837	NNMT	+	CDS			exonic	NNMT	.	synonymous SNV	NNMT:NM_006169:exon2:c.G285A:p.E95E	.	.	.	.	.	.	.	.	.	.	.	.	.	.	.	Iossifov;Satterstrom2020	12687.s1	;12687		;12687.fa	;12687.mo	;Male	NA	NA	NA
975	DEASD_0137_001||11_114441796_T_G	exome	NDD	autism	11_114441796_T_G	11	114441796	T	G	54827	NXPE4	-	CDS			exonic	NXPE4	.	nonsynonymous SNV	NXPE4:NM_001077639:exon6:c.A1499C:p.K500T,NXPE4:NM_017678:exon6:c.A647C:p.K216T	T	P	P	D	N	M	T	D	T	T	T	N	24.1	1.061	0.809	DeRubeis2014	DEASD_0137_001						NA	NA	NA
976	DDDP110974||11_114453414_C_T	exome	NDD	DD	11_114453414_C_T	11	114453414	C	T	54827	NXPE4	-	CDS			exonic	NXPE4	.	nonsynonymous SNV	NXPE4:NM_001077639:exon3:c.G426A:p.M142I	T	B	B	D	D	L	T	N	T	T	T	D	12.81	0.807	0.987	Heyne_2018	DDDP110974		simplex			male	NA	NA	NA
977	14028.s1||11_114569219_C_A	exome	control	control	11_114569219_C_A	11	114569219	C	A	120406	NXPE2	+	CDS			exonic	NXPE2	.	nonsynonymous SNV	NXPE2:NM_182495:exon3:c.C585A:p.H195Q	D	D	P	D	D	M	T	D	T	T	D	D	26.1	-0.013	0.896	Satterstrom2020	14028.s1	14028		14028.fa	14028.mo	Female	NA	NA	NA
978	DDDP104026||11_115085403_C_G	exome	NDD	DD	11_115085403_C_G	11	115085403	C	G	23705	CADM1	-	CDS			exonic	CADM1	.	nonsynonymous SNV	CADM1:NM_001098517:exon7:c.G919C:p.D307H,CADM1:NM_001301043:exon7:c.G919C:p.D307H,CADM1:NM_001301044:exon7:c.G919C:p.D307H,CADM1:NM_001301045:exon7:c.G919C:p.D307H,CADM1:NM_014333:exon7:c.G919C:p.D307H	T	B	P	D	D	M	D	D	T	T	D	D	24.9	0.935	1	Heyne_2018	DDDP104026		simplex			male	NA	NA	NA
979	G01-GEA-235-HI||11_115109253_G_A	exome	NDD	autism	11_115109253_G_A	11	115109253	G	A	23705	CADM1	-	CDS			exonic	CADM1	.	nonsynonymous SNV	CADM1:NM_001098517:exon3:c.C391T:p.P131S,CADM1:NM_001301043:exon3:c.C391T:p.P131S,CADM1:NM_001301044:exon3:c.C391T:p.P131S,CADM1:NM_001301045:exon3:c.C391T:p.P131S,CADM1:NM_014333:exon3:c.C391T:p.P131S	D	D	P	D	D	L	T	N	T	T	D	D	24.5	1.048	1	Satterstrom2020	G01-GEA-235-HI	G01-GEA-235-HI		G01-GEA-235-PA	G01-GEA-235-MA	Male	NA	NA	NA
980	DDDP102108||11_115109265_A_T	exome	NDD	DD	11_115109265_A_T	11	115109265	A	T	23705	CADM1	-	CDS			exonic	CADM1	.	nonsynonymous SNV	CADM1:NM_001098517:exon3:c.T379A:p.Y127N,CADM1:NM_001301043:exon3:c.T379A:p.Y127N,CADM1:NM_001301044:exon3:c.T379A:p.Y127N,CADM1:NM_001301045:exon3:c.T379A:p.Y127N,CADM1:NM_014333:exon3:c.T379A:p.Y127N	D	D	D	D	D	M	T	D	T	T	D	D	26.3	1.199	0.998	Heyne_2018	DDDP102108		simplex			male	NA	NA	NA
981	80001100648||11_115316526_C_T	exome	NDD	autism	11_115316526_C_T	11	115316526	C	T	23705	CADM1	-	intron	SINE	1	intronic	CADM1	.	.	.	.	.	.	.	.	.	.	.	.	.	.	.	.	.	.	Satterstrom2020	80001100648	80001100648		80001100648-2	80001100648-1	Male	NA	NA	NA
982	08C77633||11_1155105_G_T	exome	NDD	autism	11_1155105_G_T	11	1155105	G	T	727897	MUC5B	+	intron			intronic	MUC5AC	.	.	.	.	.	.	.	.	.	.	.	.	.	.	.	.	.	.	Satterstrom2020	08C77633	08C77633		08C77635	08C77634	Male	NA	NA	NA
983	DDDP104596||11_1158062_C_T	exome	NDD	DD	11_1158062_C_T	11	1158062	C	T	727897	MUC5B	+	CDS			exonic	MUC5AC	.	unknown	UNKNOWN	.	D	P	.	.	.	.	.	D	D	.	D	27.3	-0.194	0.007	Heyne_2018	DDDP104596		simplex			female	NA	NA	NA
984	006-07-107598||11_1162304_G_A	exome	NDD	autism	11_1162304_G_A	11	1162304	G	A	727897	MUC5B	+	CDS			exonic	MUC5AC	.	unknown	UNKNOWN	.	P	B	.	.	.	.	.	T	T	.	N	12.96	0.1	0.184	Satterstrom2020	006-07-107598	006-07-107598		008-07-107600	007-07-107599	Male	NA	NA	NA
985	25007.p1||11_116650529_G_A	exome	NDD	tourette_syndrome	11_116650529_G_A	11	116650529	G	A	8882	ZNF259	-	CDS			exonic	ZPR1	.	nonsynonymous SNV	ZPR1:NM_001317086:exon12:c.C1042T:p.H348Y,ZPR1:NM_003904:exon13:c.C1204T:p.H402Y	T	P	B	D	D	M	T	N	T	T	T	D	20.9	1.048	0.982	Willsey2017	25007.p1						NA	NA	NA
986	13403.p1||11_116661599_C_G	exome	NDD	autism	11_116661599_C_G	11	116661599	C	G	116519	APOA5	-	CDS			exonic	APOA5	.	nonsynonymous SNV	APOA5:NM_001166598:exon4:c.G346C:p.E116Q,APOA5:NM_052968:exon4:c.G346C:p.E116Q	T	B	B	N	N	L	T	N	T	T	D	N	0.131	-0.565	0.928	SSC_Iossifov_2014	13403.p1	13403		13403.fa	13403.mo	Male	NA	NA	NA
987	DDDP119412||11_116692224_C_T	exome	NDD	DD	11_116692224_C_T	11	116692224	C	T	337	APOA4	-	CDS			exonic	APOA4	.	nonsynonymous SNV	APOA4:NM_000482:exon3:c.G550A:p.D184N	T	P	B	N	N	M	T	N	T	T	D	N	12.6	0.024	0.02	Heyne_2018	DDDP119412		simplex			female	NA	NA	NA
988	EGAN00001100925||11_116719925_C_T	exome	NDD	autism	11_116719925_C_T	11	116719925	C	T	23387	SIK3	-	CDS			exonic	SIK3	.	nonsynonymous SNV	SIK3:NM_001281749:exon21:c.G3406A:p.G1136R,SIK3:NM_025164:exon21:c.G3586A:p.G1196R,SIK3:NM_001281748:exon22:c.G2929A:p.G977R	D	D	P	U	D	L	T	D	T	T	D	D	31	0.935	0.588	Satterstrom2020	EGAN00001100925	EGAN00001100925		EGAN00001101186	EGAN00001101007	Male	NA	NA	NA
989	DDDP118352||11_116719978_A_G	exome	NDD	DD	11_116719978_A_G	11	116719978	A	G	23387	SIK3	-	CDS			exonic	SIK3	.	nonsynonymous SNV	SIK3:NM_001281749:exon21:c.T3353C:p.M1118T,SIK3:NM_025164:exon21:c.T3533C:p.M1178T,SIK3:NM_001281748:exon22:c.T2876C:p.M959T	D	B	B	U	D	L	T	N	T	T	D	D	23.6	1.199	0.998	Heyne_2018	DDDP118352		simplex			male	NA	NA	NA
990	13558.p1||11_116732054_G_A	exome	NDD	autism	11_116732054_G_A	11	116732054	G	A	23387	SIK3	-	CDS||5'UTR			exonic	SIK3	.	synonymous SNV	SIK3:NM_001281749:exon18:c.C2217T:p.N739N,SIK3:NM_025164:exon18:c.C2217T:p.N739N,SIK3:NM_001281748:exon19:c.C1740T:p.N580N	.	.	.	.	.	.	.	.	.	.	.	.	.	.	.	Iossifov;Satterstrom2020	13558.p1	;13558		;13558.fa	;13558.mo	;Male	NA	NA	NA
991	DDDP100128||11_116744637_G_A	exome	NDD	DD	11_116744637_G_A	11	116744637	G	A	23387	SIK3	-	CDS			exonic	SIK3	.	synonymous SNV	SIK3:NM_001281749:exon11:c.C1419T:p.T473T,SIK3:NM_025164:exon12:c.C1563T:p.T521T,SIK3:NM_001281748:exon13:c.C1086T:p.T362T	.	.	.	.	.	.	.	.	.	.	.	.	.	.	.	Heyne_2018	DDDP100128		simplex			male	NA	NA	NA
992	12438.p1||11_117034592_C_G	exome	NDD	autism	11_117034592_C_G	11	117034592	C	G	5049	PAFAH1B2	+	CDS			exonic;splicing	PAFAH1B2;PAFAH1B2	NM_001184748:exon5:c.393+2C>G	nonsynonymous SNV	PAFAH1B2:NM_001309431:exon4:c.C251G:p.A84G,PAFAH1B2:NM_001184746:exon5:c.C395G:p.A132G,PAFAH1B2:NM_001184747:exon5:c.C395G:p.A132G,PAFAH1B2:NM_002572:exon5:c.C395G:p.A132G	D	D	P	D	D	M	T	D	T	T	T	D	25.1	0.871	1	Iossifov;Satterstrom2020	12438.p1	;12438		;SSC05270	;SSC05264	;Male	NA	NA	NA
993	DDDP116126||11_117058102_C_T	exome	NDD	DD	11_117058102_C_T	11	117058102	C	T	51092	SIDT2	+	CDS			exonic	SIDT2	.	stopgain	SIDT2:NM_001040455:exon11:c.C1024T:p.R342X	.	.	.	N	A	.	.	.	.	.	.	D	41	0.935	0.885	Heyne_2018	DDDP116126		simplex			male	NA	NA	NA
994	201-10-113274||11_117058145_G_A	exome	control	control	11_117058145_G_A	11	117058145	G	A	51092	SIDT2	+	CDS			exonic	SIDT2	.	nonsynonymous SNV	SIDT2:NM_001040455:exon11:c.G1067A:p.G356D	T	P	P	N	N	M	T	N	T	T	T	D	15.93	0.135	0.986	Satterstrom2020	201-10-113274	201-10-113274		203-10-113276	202-10-113275	Male	NA	NA	NA
995	11498.p1||11_117059392_C_T	exome	NDD	autism	11_117059392_C_T	11	117059392	C	T	51092	SIDT2	+	intron			intronic	SIDT2	.	.	.	.	.	.	.	.	.	.	.	.	.	.	.	.	.	.	Satterstrom2020	11498.p1	11498		5353	5385	Male	NA	NA	NA
996	13478.p1||11_117062673_C_T	exome	NDD	autism	11_117062673_C_T	11	117062673	C	T	51092	SIDT2	+	CDS			exonic	SIDT2	.	synonymous SNV	SIDT2:NM_001040455:exon19:c.C1815T:p.S605S	.	.	.	.	.	.	.	.	.	.	.	.	.	.	.	Iossifov;SSC_Iossifov_2014	13478.p1	;13478		;13478.fa	;13478.mo	;Male	NA	NA	NA
997	11102.p1||11_117098927_C_T	exome	NDD	autism	11_117098927_C_T	11	117098927	C	T	9159	PCSK7	-	intron			intronic	PCSK7	.	.	.	.	.	.	.	.	.	.	.	.	.	.	.	.	.	.	Iossifov;Satterstrom2020	11102.p1	;11102		;SSC00127	;SSC00126	;Male	NA	NA	NA
998	285-04-101060||11_117099059_C_T	exome	NDD	autism	11_117099059_C_T	11	117099059	C	T	9159	PCSK7	-	CDS			exonic	PCSK7	.	nonsynonymous SNV	PCSK7:NM_004716:exon4:c.G476A:p.R159Q	T	B	B	N	D	L	T	N	T	T	D	N	22.7	0.935	0.968	Satterstrom2020	285-04-101060	285-04-101060		286-04-101061	263-04-100900	Male	NA	NA	NA
999	11872.s1||11_117100406_G_A	exome	control	control	11_117100406_G_A	11	117100406	G	A	9159	PCSK7	-	CDS			exonic	PCSK7	.	nonsynonymous SNV	PCSK7:NM_004716:exon3:c.C155T:p.P52L	T	B	B	N	N	N	T	N	T	T	T	N	12.3	0.122	0.877	Iossifov;SSC_Iossifov_2014	11872.s1	;11872		;11872.fa	;11872.mo	;Female	NA	NA	NA
1000	09C89716||11_117109607_G_A	exome	NDD	autism	11_117109607_G_A	11	117109607	G	A	257160	RNF214	+	CDS			exonic	RNF214	.	nonsynonymous SNV	RNF214:NM_001077239:exon3:c.G398A:p.R133Q,RNF214:NM_207343:exon3:c.G398A:p.R133Q	T	B	B	N	D	N	T	N	T	T	T	N	17.8	0.998	0.997	DeRubeis2014;Satterstrom2020	09C89716	;09C89716		;09C89717	;09C89718	;Male	NA	NA	NA
1001	AU106A||11_117152397_C_T	exome	NDD	autism	11_117152397_C_T	11	117152397	C	T	257160	RNF214	+	CDS			exonic	RNF214	.	nonsynonymous SNV	RNF214:NM_001077239:exon10:c.C1318T:p.P440S,RNF214:NM_001278249:exon10:c.C853T:p.P285S,RNF214:NM_207343:exon10:c.C1318T:p.P440S	T	D	D	D	D	L	T	N	T	T	T	D	24.7	0.935	0.996	DeRubeis2014;Satterstrom2020	AU106A	;AU106A		;AU106B	;AU106C	;Male	NA	NA	NA
1002	7007P||11_117152637_C_T	exome	NDD	cerebral_palsy	11_117152637_C_T	11	117152637	C	T	257160	RNF214	+	CDS			exonic	RNF214	.	nonsynonymous SNV	RNF214:NM_001077239:exon11:c.C1363T:p.P455S,RNF214:NM_001278249:exon11:c.C898T:p.P300S,RNF214:NM_207343:exon11:c.C1363T:p.P455S	T	B	B	D	D	L	T	N	T	T	T	D	23.4	0.935	0.997	McMichael2015	7007P						NA	NA	NA
1003	4016-1||11_117209324_A_G	exome	NDD	schizophrenia	11_117209324_A_G	11	117209324	A	G	22897	CEP164	+	CDS			exonic	CEP164	.	nonsynonymous SNV	CEP164:NM_001271933:exon2:c.A22G:p.I8V,CEP164:NM_014956:exon3:c.A22G:p.I8V	D	P	B	N	D	M	T	N	T	T	T	D	22.9	0.158	0.114	Fromer2014	4016-1						NA	NA	NA
1004	11024.p1||11_117215011_G_A	exome	NDD	autism	11_117215011_G_A	11	117215011	G	A	22897	CEP164	+	intron			intronic	CEP164	.	.	.	.	.	.	.	.	.	.	.	.	.	.	.	.	.	.	Satterstrom2020	11024.p1	11024		SSC01126	SSC01128	Male	NA	NA	NA
1005	DDDP109498||11_117280637_C_T	exome	NDD	DD	11_117280637_C_T	11	117280637	C	T	22897	CEP164	+	CDS			exonic	CEP164	.	nonsynonymous SNV	CEP164:NM_001271933:exon29:c.C4037T:p.T1346M,CEP164:NM_014956:exon30:c.C4052T:p.T1351M	D	D	P	N	N	M	T	N	T	T	D	D	24.6	0.852	0.233	Heyne_2018	DDDP109498		simplex			female	NA	NA	NA
1006	13582.p1||11_117301436_A_G	exome	NDD	autism	11_117301436_A_G	11	117301436	A	G	57453	DSCAML1	-	intron			splicing	DSCAML1	NM_020693:exon32:c.5866+2T>C	.	.	.	.	.	.	D	.	.	.	.	.	.	D	24.8	1.14	0.998	Iossifov;Satterstrom2020	13582.p1	;13582		;SSC08360	;SSC08355	;Male	NA	NA	NA
1007	DDDP116750||11_117308075_G_T	exome	NDD	DD	11_117308075_G_T	11	117308075	G	T	57453	DSCAML1	-	CDS			exonic	DSCAML1	.	nonsynonymous SNV	DSCAML1:NM_020693:exon26:c.C4663A:p.H1555N	T	B	B	.	D	M	T	N	T	T	T	D	19.64	1.048	0.996	Heyne_2018	DDDP116750		simplex			male	NA	NA	NA
1008	14687.p1||11_117309629_T_C	exome	NDD	autism;ASD	11_117309629_T_C	11	117309629	T	C	57453	DSCAML1	-	CDS			exonic	DSCAML1	.	synonymous SNV	DSCAML1:NM_020693:exon24:c.A4395G:p.P1465P	.	.	.	.	.	.	.	.	.	.	.	.	.	.	.	Iossifov;Heyne_2018;Satterstrom2020	14687.p1	;14687	;simplex	;SSC12233	;SSC12229	;male;Male	NA	NA	NA
1009	388-05-103530||11_117332319_G_C	exome	NDD	autism	11_117332319_G_C	11	117332319	G	C	57453	DSCAML1	-	intron			intronic	DSCAML1	.	.	.	.	.	.	.	.	.	.	.	.	.	.	.	.	.	.	Satterstrom2020	388-05-103530	388-05-103530		321-05-103991	385-05-103534	Female	NA	NA	NA
1010	TAS_F0273Y||11_117342590_C_T	exome	NDD	autism	11_117342590_C_T	11	117342590	C	T	57453	DSCAML1	-	CDS			exonic	DSCAML1	.	nonsynonymous SNV	DSCAML1:NM_020693:exon15:c.G3127A:p.E1043K	D	P	P	.	D	M	T	D	T	T	D	D	33	0.935	0.88	Satterstrom2020	TAS_F0273Y	TAS_F0273Y		TAS_F0273YA	TAS_F0273YB	Male	NA	NA	NA
1011	12759.p1||11_117374523_T_C	exome	NDD	autism	11_117374523_T_C	11	117374523	T	C	57453	DSCAML1	-	intron			intronic	DSCAML1	.	.	.	.	.	.	.	.	.	.	.	.	.	.	.	.	.	.	Satterstrom2020	12759.p1	12759		SSC06402	SSC06393	Male	NA	NA	NA
1012	14366.s1||11_117387216_G_A	exome	control	control	11_117387216_G_A	11	117387216	G	A	57453	DSCAML1	-	CDS			exonic	DSCAML1	.	synonymous SNV	DSCAML1:NM_020693:exon8:c.C1929T:p.L643L	.	.	.	.	.	.	.	.	.	.	.	.	.	.	.	Iossifov;Satterstrom2020	14366.s1	;14366		;14366.fa	;14366.mo	;Female	NA	NA	NA
1013	93421087||11_117647604_C_T	exome	NDD	tourette_syndrome	11_117647604_C_T	11	117647604	C	T	57453	DSCAML1	-	CDS			exonic	DSCAML1	.	nonsynonymous SNV	DSCAML1:NM_020693:exon3:c.G593A:p.R198H	D	D	D	.	D	M	T	D	T	T	D	D	28.6	0.852	1	Willsey2017	93421087						NA	NA	NA
1014	DDDP101534||11_117651420_C_T	exome	NDD	DD	11_117651420_C_T	11	117651420	C	T	57453	DSCAML1	-	CDS||5'UTR			exonic	DSCAML1	.	nonsynonymous SNV	DSCAML1:NM_020693:exon2:c.G332A:p.G111D	D	D	D	.	D	M	T	D	T	T	D	D	28.9	0.935	0.987	Heyne_2018	DDDP101534		simplex			female	NA	NA	NA
1015	343.163||11_117693157_C_G	exome	NDD	ID	11_117693157_C_G	11	117693157	C	G	100533181	FXYD6-FXYD2	-	CDS			exonic	FXYD2;FXYD6-FXYD2	.	nonsynonymous SNV	FXYD2:NM_001680:exon3:c.G103C:p.G35R,FXYD2:NM_021603:exon3:c.G97C:p.G33R,FXYD6-FXYD2:NM_001204268:exon8:c.G337C:p.G113R	T	D	D	N	D	.	T	D	T	D	D	D	24.3	0.935	0.911	Heyne_2018	343.163		simplex			male	NA	NA	NA
1016	14500.s1||11_117789318_G_A	exome	control	control	11_117789318_G_A	11	117789318	G	A	84000	TMPRSS13	-	CDS||5'UTR			exonic	TMPRSS13	.	nonsynonymous SNV	TMPRSS13:NM_001077263:exon2:c.C257T:p.P86L,TMPRSS13:NM_001206789:exon2:c.C257T:p.P86L,TMPRSS13:NM_001206790:exon2:c.C257T:p.P86L,TMPRSS13:NM_001244995:exon2:c.C257T:p.P86L	D	P	B	N	N	L	D	N	T	D	D	N	23.6	1.03	0.341	Satterstrom2020	14500.s1	14500		36203	36205	Female	NA	NA	NA
1017	12385.p1||11_117789338_T_C	exome	NDD	autism	11_117789338_T_C	11	117789338	T	C	84000	TMPRSS13	-	CDS||5'UTR			exonic	TMPRSS13	.	synonymous SNV	TMPRSS13:NM_001077263:exon2:c.A237G:p.A79A,TMPRSS13:NM_001206789:exon2:c.A237G:p.A79A,TMPRSS13:NM_001206790:exon2:c.A237G:p.A79A,TMPRSS13:NM_001244995:exon2:c.A237G:p.A79A	.	.	.	.	N	.	.	.	.	.	.	N	0.357	-0.472	0	Satterstrom2020	12385.p1	12385		68689	68691	Male	NA	NA	NA
1018	DEASD_0023_001||11_118037819_C_G	exome	NDD	autism	11_118037819_C_G	11	118037819	C	G	6327	SCN2B	-	intron			intronic	SCN2B	.	.	.	.	.	.	.	.	.	.	.	.	.	.	.	.	.	.	Satterstrom2020	DEASD_0023_001	DEASD_0023_001		DEASD_0023_500	DEASD_0023_600	Female	NA	NA	NA
1019	235-08-110012||11_118047189_G_A	exome	NDD	autism	11_118047189_G_A	11	118047189	G	A	6327	SCN2B	-	5'UTR			UTR5	SCN2B	NM_004588:c.-43C>T	.	.	.	.	.	.	.	.	.	.	.	.	.	.	.	.	.	Satterstrom2020	235-08-110012	235-08-110012		237-08-110014	236-08-110013	Female	NA	NA	NA
1020	11158.p1||11_118245853_A_T	exome	NDD	autism;ASD	11_118245853_A_T	11	118245853	A	T	9354	UBE4A	+	CDS			exonic	UBE4A	.	nonsynonymous SNV	UBE4A:NM_001204077:exon9:c.A1359T:p.R453S,UBE4A:NM_004788:exon9:c.A1380T:p.R460S	T	B	B	N	N	L	T	N	T	T	T	N	11.66	1.14	1	Iossifov;Heyne_2018;Satterstrom2020	11158.p1	;11158	;simplex	;SSC03285	;SSC03279	;male;Male	NA	NA	NA
1021	13682.s1||11_118247309_T_A	exome	control	control	11_118247309_T_A	11	118247309	T	A	9354	UBE4A	+	CDS			exonic	UBE4A	.	nonsynonymous SNV	UBE4A:NM_001204077:exon10:c.T1471A:p.L491M,UBE4A:NM_004788:exon10:c.T1492A:p.L498M	D	P	P	D	D	M	T	N	T	T	T	D	25.3	0.144	1	Iossifov;SSC_Iossifov_2014	13682.s1	;13682		;13682.fa	;13682.mo	;Male	NA	NA	NA
1022	DDDP101284||11_118307508_C_A	exome	NDD	DD	11_118307508_C_A	11	118307508	C	A	4297	MLL	+	CDS			exonic	KMT2A	.	stopgain	KMT2A:NM_001197104:exon1:c.C281A:p.S94X,KMT2A:NM_005933:exon1:c.C281A:p.S94X	.	.	.	U	A	.	.	.	.	.	.	D	35	0.777	1	Heyne_2018	DDDP101284		simplex			male	NA	NA	NA
1023	DDDP115237||11_118342427_C_T	exome	NDD	DD	11_118342427_C_T	11	118342427	C	T	4297	MLL	+	CDS			exonic	KMT2A	.	stopgain	KMT2A:NM_001197104:exon3:c.C553T:p.R185X,KMT2A:NM_005933:exon3:c.C553T:p.R185X	.	.	.	D	A	.	.	.	.	.	.	D	37	0.935	1	Heyne_2018	DDDP115237		simplex			female	NA	NA	NA
1024	DDDP112030||11_118344326_A_T	exome	NDD	DD	11_118344326_A_T	11	118344326	A	T	4297	MLL	+	CDS			exonic	KMT2A	.	stopgain	KMT2A:NM_001197104:exon3:c.A2452T:p.K818X,KMT2A:NM_005933:exon3:c.A2452T:p.K818X	.	.	.	D	A	.	.	.	.	.	.	D	37	1.14	1	Heyne_2018	DDDP112030		simplex			female	NA	NA	NA
1025	DDDP103044||11_118344533_G_T	exome	NDD	DD	11_118344533_G_T	11	118344533	G	T	4297	MLL	+	CDS	Low_complexity	1	exonic	KMT2A	.	stopgain	KMT2A:NM_001197104:exon3:c.G2659T:p.E887X,KMT2A:NM_005933:exon3:c.G2659T:p.E887X	.	.	.	D	A	.	.	.	.	.	.	D	38	0.998	0.999	Heyne_2018	DDDP103044		simplex			female	NA	NA	NA
1026	08C75268|1339JS0028||11_118344818_T_A	exome	NDD	autism	11_118344818_T_A	11	118344818	T	A	4297	MLL	+	CDS			exonic	KMT2A	.	nonsynonymous SNV	KMT2A:NM_001197104:exon3:c.T2944A:p.S982T,KMT2A:NM_005933:exon3:c.T2944A:p.S982T	T	B	B	N	D	N	D	N	T	T	T	D	10.47	1.011	0.998	Satterstrom2020;DeRubeis2014;ASC_Neale2012	08C75268|1339JS0028	08C75268;;1339JS0028		08C75269;;1339JS0027	08C75270;;1339JS0026	Male;	NA	NA	NA
1027	DDDP108117||11_118344908_C_T	exome	NDD	DD	11_118344908_C_T	11	118344908	C	T	4297	MLL	+	CDS			exonic	KMT2A	.	stopgain	KMT2A:NM_001197104:exon3:c.C3034T:p.Q1012X,KMT2A:NM_005933:exon3:c.C3034T:p.Q1012X	.	.	.	D	A	.	.	.	.	.	.	D	37	0.892	1	Heyne_2018	DDDP108117		simplex			male	NA	NA	NA
1028	DDDP112054||11_118348685_A_G	exome	NDD	DD	11_118348685_A_G	11	118348685	A	G	4297	MLL	+	CDS			exonic	KMT2A	.	nonsynonymous SNV	KMT2A:NM_001197104:exon5:c.A3338G:p.K1113R,KMT2A:NM_005933:exon5:c.A3338G:p.K1113R	D	D	D	D	D	M	D	N	D	D	D	D	26.8	1.194	1	Heyne_2018	DDDP112054		simplex			male	NA	NA	NA
1029	kz||11_118348807_C_T	exome	NDD	EE	11_118348807_C_T	11	118348807	C	T	4297	MLL	+	CDS			exonic	KMT2A	.	nonsynonymous SNV	KMT2A:NM_001197104:exon5:c.C3460T:p.R1154W,KMT2A:NM_005933:exon5:c.C3460T:p.R1154W	D	D	D	D	D	M	D	D	D	D	D	D	35	0.935	0.971	Heyne_2018	kz		simplex			female	NA	NA	NA
1030	DDDP104026||11_118348903_A_G	exome	NDD	DD	11_118348903_A_G	11	118348903	A	G	4297	MLL	+	CDS			exonic	KMT2A	.	nonsynonymous SNV	KMT2A:NM_001197104:exon5:c.A3556G:p.K1186E,KMT2A:NM_005933:exon5:c.A3556G:p.K1186E	D	D	D	D	D	M	D	D	D	D	D	D	28.1	1.14	1	Heyne_2018	DDDP104026		simplex			male	NA	NA	NA
1031	DDDP102076||11_118352585_C_T	exome	NDD	DD	11_118352585_C_T	11	118352585	C	T	4297	MLL	+	CDS||5'UTR			exonic	KMT2A	.	stopgain	KMT2A:NM_001197104:exon7:c.C3790T:p.R1264X,KMT2A:NM_005933:exon7:c.C3790T:p.R1264X	.	.	.	N	A	.	.	.	.	.	.	D	37	0.935	0.331	Heyne_2018	DDDP102076		simplex			female	NA	NA	NA
1032	DDDP107688||11_118352585_C_T	exome	NDD	DD	11_118352585_C_T	11	118352585	C	T	4297	MLL	+	CDS||5'UTR			exonic	KMT2A	.	stopgain	KMT2A:NM_001197104:exon7:c.C3790T:p.R1264X,KMT2A:NM_005933:exon7:c.C3790T:p.R1264X	.	.	.	N	A	.	.	.	.	.	.	D	37	0.935	0.331	Heyne_2018	DDDP107688		simplex			female	NA	NA	NA
1033	1458001||11_118352596_C_T	exome	NDD	autism	11_118352596_C_T	11	118352596	C	T	4297	MLL	+	CDS||5'UTR			exonic	KMT2A	.	synonymous SNV	KMT2A:NM_001197104:exon7:c.C3801T:p.V1267V,KMT2A:NM_005933:exon7:c.C3801T:p.V1267V	.	.	.	.	.	.	.	.	.	.	.	.	.	.	.	Satterstrom2020	1458001	1458001		1458011	1458012	Male	NA	NA	NA
1034	DDDP112186||11_118359327_A_C	exome	NDD	DD	11_118359327_A_C	11	118359327	A	C	4297	MLL	+	intron			splicing	KMT2A	NM_005933:exon11:c.4333-2A>C;NM_001197104:exon11:c.4333-2A>C	.	.	.	.	.	.	D	.	.	.	.	.	.	D	24.4	1.189	0.866	Heyne_2018	DDDP112186		simplex			male	NA	NA	NA
1035	DDDP111378||11_118367083_G_T	exome	NDD	DD	11_118367083_G_T	11	118367083	G	T	4297	MLL	+	intron			splicing	KMT2A	NM_005933:exon20:c.5655+1G>T;NM_001197104:exon20:c.5664+1G>T	.	.	.	.	.	.	D	.	.	.	.	.	.	D	25.1	0.998	0.994	Heyne_2018	DDDP111378		simplex			male	NA	NA	NA
1036	DDDP111714||11_118368658_G_T	exome	NDD	DD	11_118368658_G_T	11	118368658	G	T	4297	MLL	+	CDS			exonic	KMT2A	.	nonsynonymous SNV	KMT2A:NM_001197104:exon21:c.G5672T:p.G1891V,KMT2A:NM_005933:exon21:c.G5663T:p.G1888V	D	D	D	D	D	M	D	D	D	D	D	D	32	1.048	0.999	Heyne_2018	DDDP111714		simplex			male	NA	NA	NA
1037	DDDP111687||11_118372446_C_T	exome	NDD	DD	11_118372446_C_T	11	118372446	C	T	4297	MLL	+	CDS			exonic	KMT2A	.	stopgain	KMT2A:NM_001197104:exon26:c.C6379T:p.R2127X,KMT2A:NM_005933:exon26:c.C6370T:p.R2124X	.	.	.	D	A	.	.	.	.	.	.	D	38	0.015	0.971	Heyne_2018	DDDP111687		simplex			male	NA	NA	NA
1038	DDDP102547||11_118373178_C_T	exome	NDD	DD	11_118373178_C_T	11	118373178	C	T	4297	MLL	+	CDS			exonic	KMT2A	.	stopgain	KMT2A:NM_001197104:exon27:c.C6571T:p.R2191X,KMT2A:NM_005933:exon27:c.C6562T:p.R2188X	.	.	.	N	A	.	.	.	.	.	.	D	38	0.892	1	Heyne_2018	DDDP102547		simplex			female	NA	NA	NA
1039	461|Lelieveld_461||11_118375138_G_T	exome	NDD	ID;ID	11_118375138_G_T	11	118375138	G	T	4297	MLL	+	CDS			exonic	KMT2A	.	nonsynonymous SNV	KMT2A:NM_001197104:exon27:c.G8531T:p.C2844F,KMT2A:NM_005933:exon27:c.G8522T:p.C2841F	D	D	D	D	D	L	D	D	D	D	D	D	26.9	1.048	1	Heyne_2018;Lelieveld2016	461|Lelieveld_461		simplex;			male;	NA	NA	NA
1040	DDDP113478||11_118375184_T_A	exome	NDD	DD	11_118375184_T_A	11	118375184	T	A	4297	MLL	+	CDS			exonic	KMT2A	.	nonsynonymous SNV	KMT2A:NM_001197104:exon27:c.T8577A:p.N2859K,KMT2A:NM_005933:exon27:c.T8568A:p.N2856K	D	D	D	D	D	L	D	D	D	D	D	D	24.7	1.061	1	Heyne_2018	DDDP113478		simplex			female	NA	NA	NA
1041	08C75365||11_118398277_T_C	exome	NDD	autism	11_118398277_T_C	11	118398277	T	C	143941	TTC36	+	CDS||5'UTR			exonic	TTC36	.	nonsynonymous SNV	TTC36:NM_001080441:exon1:c.T68C:p.I23T	T	B	B	N	D	L	T	N	T	T	T	N	3.718	0.118	0.119	Satterstrom2020	08C75365	08C75365		08C75367	08C75366	Male	NA	NA	NA
1042	EGAN00001101262||11_118402773_G_A	exome	NDD	autism	11_118402773_G_A	11	118402773	G	A	84866	TMEM25	+	intron			intronic	TMEM25	.	.	.	.	.	.	.	.	.	.	.	.	.	.	.	.	.	.	Satterstrom2020	EGAN00001101262	EGAN00001101262		EGAN00001101393	EGAN00001101392	Male	NA	NA	NA
1043	Fam_159022||11_118485358_C_T	exome	NDD	E_NDD	11_118485358_C_T	11	118485358	C	T	23187	PHLDB1	+	CDS			exonic	PHLDB1	.	stopgain	PHLDB1:NM_001144758:exon3:c.C145T:p.R49X,PHLDB1:NM_001144759:exon3:c.C145T:p.R49X,PHLDB1:NM_015157:exon4:c.C145T:p.R49X	.	.	.	D	A	.	.	.	.	.	.	D	36	-0.456	0.916	Heyne_2018	Fam_159022		simplex			male	NA	NA	NA
1044	513|Lelieveld_513||11_118498963_G_A	exome	NDD	ID;ID	11_118498963_G_A	11	118498963	G	A	23187	PHLDB1	+	CDS			exonic	PHLDB1	.	nonsynonymous SNV	PHLDB1:NM_001144758:exon6:c.G1424A:p.R475Q,PHLDB1:NM_001144759:exon6:c.G1424A:p.R475Q,PHLDB1:NM_015157:exon7:c.G1424A:p.R475Q	T	D	P	N	N	L	T	N	T	T	T	D	23.6	1.048	0.963	Heyne_2018;Lelieveld2016	513|Lelieveld_513		simplex;			male;	NA	NA	NA
1045	17397||11_118499079_C_T	exome	NDD	EE	11_118499079_C_T	11	118499079	C	T	23187	PHLDB1	+	CDS			exonic	PHLDB1	.	nonsynonymous SNV	PHLDB1:NM_001144758:exon6:c.C1540T:p.R514C,PHLDB1:NM_001144759:exon6:c.C1540T:p.R514C,PHLDB1:NM_015157:exon7:c.C1540T:p.R514C	D	P	B	N	N	L	T	N	T	T	T	N	24.2	0.935	0.953	Heyne_2018	17397		simplex				NA	NA	NA
1046	3157-1||11_118499232_G_A	exome	NDD	schizophrenia	11_118499232_G_A	11	118499232	G	A	23187	PHLDB1	+	CDS			exonic	PHLDB1	.	nonsynonymous SNV	PHLDB1:NM_001144758:exon6:c.G1693A:p.G565R,PHLDB1:NM_001144759:exon6:c.G1693A:p.G565R,PHLDB1:NM_015157:exon7:c.G1693A:p.G565R	D	D	D	D	D	M	T	D	T	T	T	D	29.3	1.048	1	Fromer2014	3157-1						NA	NA	NA
1047	736|Lelieveld_736||11_118509931_G_A	exome	NDD	ID;ID	11_118509931_G_A	11	118509931	G	A	23187	PHLDB1	+	CDS||5'UTR			exonic	PHLDB1	.	nonsynonymous SNV	PHLDB1:NM_001144758:exon12:c.G2698A:p.G900S,PHLDB1:NM_001144759:exon12:c.G2698A:p.G900S,PHLDB1:NM_015157:exon13:c.G2698A:p.G900S	D	D	D	D	D	M	T	D	T	T	D	D	24.5	0.953	0.999	Heyne_2018;Lelieveld2016	736|Lelieveld_736		simplex;			female;	NA	NA	NA
1048	AGG0064||11_118527525_A_G	exome	NDD	autism	11_118527525_A_G	11	118527525	A	G	23187	PHLDB1	+	CDS			exonic	PHLDB1	.	nonsynonymous SNV	PHLDB1:NM_001144759:exon21:c.A3952G:p.M1318V,PHLDB1:NM_001144758:exon23:c.A4126G:p.M1376V,PHLDB1:NM_015157:exon24:c.A4126G:p.M1376V	D	P	B	D	D	L	T	D	T	T	T	D	22.8	1.199	1	Satterstrom2020	AGG0064	AGG0064		AGG0159	AGG0158	Female	NA	NA	NA
1049	13726.p1||11_118532369_C_A	exome	NDD	autism;ASD	11_118532369_C_A	11	118532369	C	A	11181	TREH	-	CDS			exonic	TREH	.	unknown	UNKNOWN	T	B	B	D	D	.	T	N	T	T	D	D	24.2	0.077	1	Iossifov;Heyne_2018;Satterstrom2020	13726.p1	;13726	;simplex	;4952	;4984	;male;Male	NA	NA	NA
1050	14576.p1||11_118769835_G_A	exome	NDD	autism	11_118769835_G_A	11	118769835	G	A	283149	BCL9L	-	CDS			exonic	BCL9L	.	synonymous SNV	BCL9L:NM_182557:exon8:c.C3789T:p.P1263P	.	.	.	.	.	.	.	.	.	.	.	.	.	.	.	Iossifov;Satterstrom2020	14576.p1	;14576		;36905	;36907	;Male	NA	NA	NA
1051	458-04-101669||11_118769857_G_A	exome	NDD	autism	11_118769857_G_A	11	118769857	G	A	283149	BCL9L	-	CDS			exonic	BCL9L	.	nonsynonymous SNV	BCL9L:NM_182557:exon8:c.C3767T:p.P1256L	D	D	P	D	D	M	T	D	T	T	D	D	27.9	0.94	1	Satterstrom2020	458-04-101669	458-04-101669		460-04-101674	459-04-101671	Male	NA	NA	NA
1052	14136.s1||11_118770689_C_T	exome	control	control	11_118770689_C_T	11	118770689	C	T	283149	BCL9L	-	CDS			exonic	BCL9L	.	nonsynonymous SNV	BCL9L:NM_182557:exon7:c.G3343A:p.D1115N	D	D	D	D	D	M	T	D	T	T	T	D	34	0.852	0.997	Krumm	14136.s1						NA	NA	NA
1053	12417.p1||11_118772970_A_C	exome	NDD	autism	11_118772970_A_C	11	118772970	A	C	283149	BCL9L	-	CDS			exonic	BCL9L	.	synonymous SNV	BCL9L:NM_182557:exon6:c.T1482G:p.G494G	.	.	.	.	.	.	.	.	.	.	.	.	.	.	.	Satterstrom2020	12417.p1	12417		SSC05780	SSC05758	Male	NA	NA	NA
1054	G01-GEA-102-HI||11_118773377_T_C	exome	NDD	autism	11_118773377_T_C	11	118773377	T	C	283149	BCL9L	-	CDS			exonic	BCL9L	.	nonsynonymous SNV	BCL9L:NM_182557:exon6:c.A1075G:p.T359A	T	B	B	N	N	N	T	N	T	T	T	N	0.003	-0.019	0.499	Satterstrom2020	G01-GEA-102-HI	G01-GEA-102-HI		G01-GEA-102-PA	G01-GEA-102-MA	Male	NA	NA	NA
1055	DDDP109158||11_118773722_C_A	exome	NDD	DD	11_118773722_C_A	11	118773722	C	A	283149	BCL9L	-	CDS			exonic	BCL9L	.	nonsynonymous SNV	BCL9L:NM_182557:exon5:c.G811T:p.V271L	D	D	P	N	D	M	T	N	T	T	D	D	25.3	0.847	0.876	Heyne_2018	DDDP109158		simplex			male	NA	NA	NA
1056	200675736@1082034752||11_118779312_G_A	exome	NDD	autism	11_118779312_G_A	11	118779312	G	A	283149	BCL9L	-	CDS			exonic	BCL9L	.	nonsynonymous SNV	BCL9L:NM_182557:exon2:c.C79T:p.R27C	D	B	B	N	D	N	T	N	T	T	T	D	21.9	1.048	0.951	Satterstrom2020	200675736@1082034752	200675736@1082034752		200675734@1082034704	200675735@1082034731	Male	NA	NA	NA
1057	240-07-108276||11_118828389_C_G	exome	control	control	11_118828389_C_G	11	118828389	C	G	7379	UPK2	+	intron	LINE	1	intronic	UPK2	.	.	.	.	.	.	.	.	.	.	.	.	.	.	.	.	.	.	Satterstrom2020	240-07-108276	240-07-108276		222-07-108172	239-07-108272	Male	NA	NA	NA
1058	DDDP113964||11_118842670_C_T	exome	NDD	DD	11_118842670_C_T	11	118842670	C	T	283150	FOXR1	+	CDS			exonic	FOXR1	.	nonsynonymous SNV	FOXR1:NM_181721:exon1:c.C29T:p.T10I	T	B	B	N	D	M	D	D	D	D	D	D	22	0.008	0.436	Heyne_2018	DDDP113964		simplex			male	NA	NA	NA
1059	11370.p1||11_118868936_G_A	exome	NDD	autism	11_118868936_G_A	11	118868936	G	A	338657	CCDC84	+	CDS			exonic	CCDC84	.	nonsynonymous SNV	CCDC84:NM_198489:exon1:c.G29A:p.C10Y	D	D	D	D	D	M	T	D	D	D	D	D	28.5	1.047	0.997	Iossifov;Satterstrom2020	11370.p1	;11370		;70195	;70211	;Male	NA	NA	NA
1060	DDDP111353||11_118918737_C_T	exome	NDD	DD	11_118918737_C_T	11	118918737	C	T	10525	HYOU1	-	CDS			exonic	HYOU1	.	nonsynonymous SNV	HYOU1:NM_001130991:exon21:c.G2432A:p.R811Q,HYOU1:NM_006389:exon21:c.G2432A:p.R811Q	.	D	D	D	D	M	.	.	T	T	T	D	35	0.935	0.998	Heyne_2018	DDDP111353		simplex			female	NA	NA	NA
1061	G01-GEA-14-HI||11_118938598_C_G	exome	NDD	autism	11_118938598_C_G	11	118938598	C	G	55823	VPS11	+	CDS||5'UTR			exonic	VPS11	.	unknown	UNKNOWN	.	B	B	.	.	.	.	.	.	.	T	N	8.954	0.852	0.987	Satterstrom2020	G01-GEA-14-HI	G01-GEA-14-HI		G01-GEA-14-PA	G01-GEA-14-MA	Male	NA	NA	NA
1062	13814.s1||11_118948676_A_C	exome	control	control	11_118948676_A_C	11	118948676	A	C	55823	VPS11	+	CDS			exonic	VPS11	.	unknown	UNKNOWN	.	B	B	.	.	.	.	.	.	.	T	D	15.52	1.199	1	Iossifov;Satterstrom2020	13814.s1	;13814		;13814.fa	;13814.mo	;Female	NA	NA	NA
1063	80001103390||11_118952268_C_G	exome	NDD	autism	11_118952268_C_G	11	118952268	C	G	55823	VPS11	+	CDS			exonic	VPS11	.	unknown	UNKNOWN	.	B	B	.	.	.	.	.	.	.	T	N	14.67	0.935	0.945	Satterstrom2020	80001103390	80001103390		80001103390-2	80001103390-1	Male	NA	NA	NA
1064	DEASD_0182_001||11_118959833_C_T	exome	NDD	autism	11_118959833_C_T	11	118959833	C	T	3145	HMBS	+	CDS			exonic	HMBS	.	nonsynonymous SNV	HMBS:NM_000190:exon4:c.C202T:p.L68F,HMBS:NM_001024382:exon4:c.C151T:p.L51F,HMBS:NM_001258208:exon4:c.C202T:p.L68F,HMBS:NM_001258209:exon4:c.C151T:p.L51F	D	D	D	D	D	M	D	D	D	D	D	D	33	0.935	1	DeRubeis2014;Satterstrom2020	DEASD_0182_001	;DEASD_0182_001		;DEASD_0182_500	;DEASD_0182_600	;Male	NA	NA	NA
1065	DDDP102381||11_118965888_C_A	exome	NDD	DD	11_118965888_C_A	11	118965888	C	A	3014	H2AFX	-	CDS			exonic	H2AFX	.	nonsynonymous SNV	H2AFX:NM_002105:exon1:c.G217T:p.D73Y	D	D	D	D	D	H	T	D	D	D	D	D	34	0.932	1	Heyne_2018	DDDP102381		simplex			male	NA	NA	NA
1066	08C73049||11_119003170_C_T	exome	NDD	autism	11_119003170_C_T	11	119003170	C	T	25988	HINFP	+	5'UTR			intronic	HINFP	.	.	.	.	.	.	.	.	.	.	.	.	.	.	.	.	.	.	Satterstrom2020	08C73049	08C73049		08C73592	08C73050	Female	NA	NA	NA
1067	G01-GEA-40-HI||11_119027023_G_A	exome	NDD	autism	11_119027023_G_A	11	119027023	G	A	64137	ABCG4	+	intron			intronic	ABCG4	.	.	.	.	.	.	.	.	.	.	.	.	.	.	.	.	.	.	Satterstrom2020	G01-GEA-40-HI	G01-GEA-40-HI		G01-GEA-40-PA	G01-GEA-40-MA	Male	NA	NA	NA
1068	14321.p1||11_119029468_G_T	exome	NDD	autism	11_119029468_G_T	11	119029468	G	T	64137	ABCG4	+	intron			intronic	ABCG4	.	.	.	.	.	.	.	.	.	.	.	.	.	.	.	.	.	.	Satterstrom2020	14321.p1	14321		36092	36094	Male	NA	NA	NA
1069	DDDP111958||11_119030946_C_T	exome	NDD	DD	11_119030946_C_T	11	119030946	C	T	64137	ABCG4	+	CDS			exonic	ABCG4	.	nonsynonymous SNV	ABCG4:NM_001142505:exon13:c.C1447T:p.P483S,ABCG4:NM_001348191:exon13:c.C1447T:p.P483S,ABCG4:NM_022169:exon13:c.C1447T:p.P483S,ABCG4:NM_001348192:exon14:c.C1264T:p.P422S	.	P	P	D	D	L	.	.	T	T	T	D	23.5	0.852	0.993	Heyne_2018	DDDP111958		simplex			male	NA	NA	NA
1070	13335.s1||11_119030997_A_C	exome	control	control	11_119030997_A_C	11	119030997	A	C	64137	ABCG4	+	CDS			exonic	ABCG4	.	nonsynonymous SNV	ABCG4:NM_001142505:exon13:c.A1498C:p.T500P,ABCG4:NM_001348191:exon13:c.A1498C:p.T500P,ABCG4:NM_022169:exon13:c.A1498C:p.T500P,ABCG4:NM_001348192:exon14:c.A1315C:p.T439P	.	B	B	D	N	N	.	.	T	T	T	D	18.53	1.088	0.998	Satterstrom2020	13335.s1	13335		4840	4872	Male	NA	NA	NA
1071	13798.s1||11_119031617_C_T	exome	control	control	11_119031617_C_T	11	119031617	C	T	64137	ABCG4	+	CDS			exonic	ABCG4	.	nonsynonymous SNV	ABCG4:NM_001142505:exon15:c.C1742T:p.T581M,ABCG4:NM_001348191:exon15:c.C1742T:p.T581M,ABCG4:NM_022169:exon15:c.C1742T:p.T581M,ABCG4:NM_001348192:exon16:c.C1559T:p.T520M	.	P	P	D	D	L	.	.	T	T	T	D	25.5	0.852	0.989	Iossifov	13798.s1						NA	NA	NA
1072	13269.s1||11_119043701_A_G	exome	control	control	11_119043701_A_G	11	119043701	A	G	79671	NLRX1	+	intron			intronic	NLRX1	.	.	.	.	.	.	.	.	.	.	.	.	.	.	.	.	.	.	Satterstrom2020	13269.s1	13269		SSC07579	SSC07510	Male	NA	NA	NA
1073	12561.p1||11_119045475_C_T	exome	NDD	autism	11_119045475_C_T	11	119045475	C	T	79671	NLRX1	+	CDS			exonic	NLRX1	.	nonsynonymous SNV	NLRX1:NM_001282143:exon6:c.C1163T:p.T388M,NLRX1:NM_001282144:exon6:c.C1163T:p.T388M,NLRX1:NM_001282358:exon6:c.C1163T:p.T388M,NLRX1:NM_024618:exon6:c.C1163T:p.T388M	T	D	P	N	N	M	T	N	T	T	T	N	22.7	0.935	0.721	Iossifov;Satterstrom2020	12561.p1	;12561		;12561.fa	;12561.mo	;Male	NA	NA	NA
1074	DDDP118570||11_119045755_T_C	exome	NDD	DD	11_119045755_T_C	11	119045755	T	C	79671	NLRX1	+	CDS			exonic	NLRX1	.	synonymous SNV	NLRX1:NM_001282143:exon6:c.T1443C:p.C481C,NLRX1:NM_001282144:exon6:c.T1443C:p.C481C,NLRX1:NM_001282358:exon6:c.T1443C:p.C481C,NLRX1:NM_024618:exon6:c.T1443C:p.C481C	.	.	.	.	.	.	.	.	.	.	.	.	.	.	.	Heyne_2018	DDDP118570		simplex			female	NA	NA	NA
1075	13516.p1||11_119050981_C_T	exome	NDD	autism	11_119050981_C_T	11	119050981	C	T	79671	NLRX1	+	CDS			exonic	NLRX1	.	nonsynonymous SNV	NLRX1:NM_001282143:exon7:c.C2251T:p.R751C,NLRX1:NM_001282144:exon7:c.C2251T:p.R751C,NLRX1:NM_001282358:exon7:c.C2251T:p.R751C,NLRX1:NM_024618:exon7:c.C2251T:p.R751C	D	D	D	D	D	L	T	N	T	T	D	D	29	0.807	0.974	Krumm;Satterstrom2020	13516.p1	;13516		;SSC08026	;SSC08012	;Male	NA	NA	NA
1076	4B716||11_119052877_C_T	exome	NDD	autism	11_119052877_C_T	11	119052877	C	T	79671	NLRX1	+	CDS			exonic	NLRX1	.	nonsynonymous SNV	NLRX1:NM_001282143:exon9:c.C2429T:p.T810M,NLRX1:NM_001282144:exon9:c.C2429T:p.T810M,NLRX1:NM_001282358:exon9:c.C2429T:p.T810M,NLRX1:NM_024618:exon9:c.C2429T:p.T810M	T	D	P	D	N	L	T	N	T	T	D	N	23	0.919	0.321	Satterstrom2020	4B716	4B716		4B718	4B717	Male	NA	NA	NA
1077	DDDP111486||11_119148874_A_T	exome	NDD	DD	11_119148874_A_T	11	119148874	A	T	867	CBL	+	intron			splicing	CBL	NM_005188:exon8:c.1096-2A>T	.	.	.	.	.	.	D	.	.	.	.	.	.	D	24.9	1.199	0.938	Heyne_2018	DDDP111486		simplex			male	NA	NA	NA
1078	DDDP101504||11_119148880_A_G	exome	NDD	DD	11_119148880_A_G	11	119148880	A	G	867	CBL	+	CDS			exonic	CBL	.	nonsynonymous SNV	CBL:NM_005188:exon8:c.A1100G:p.Q367R	D	D	D	D	D	M	D	D	D	D	D	D	23	1.199	1	Heyne_2018	DDDP101504		simplex			female	NA	NA	NA
1079	DDDP112601||11_119148925_A_T	exome	NDD	DD	11_119148925_A_T	11	119148925	A	T	867	CBL	+	CDS			exonic	CBL	.	nonsynonymous SNV	CBL:NM_005188:exon8:c.A1145T:p.K382I	D	D	D	D	D	L	D	D	D	D	D	D	24.8	1.199	0.998	Heyne_2018	DDDP112601		simplex			female	NA	NA	NA
1080	14153.p1||11_119148951_G_A	exome	NDD	ASD;autism	11_119148951_G_A	11	119148951	G	A	867	CBL	+	CDS			exonic	CBL	.	nonsynonymous SNV	CBL:NM_005188:exon8:c.G1171A:p.V391I	T	B	B	D	D	L	T	N	T	T	T	D	22.8	1.048	1	Heyne_2018;Satterstrom2020	14153.p1	;14153	simplex;	;SSC09067	;SSC09060	female;Female	NA	NA	NA
1081	DDDP104256||11_119170250_T_C	exome	NDD	DD	11_119170250_T_C	11	119170250	T	C	867	CBL	+	CDS			exonic	CBL	.	nonsynonymous SNV	CBL:NM_005188:exon16:c.T2480C:p.F827S	D	P	B	D	D	L	T	N	T	T	D	D	18.86	1.061	0.995	Heyne_2018	DDDP104256		simplex			male	NA	NA	NA
1082	12157.p1||11_119185283_C_T	exome	NDD	autism	11_119185283_C_T	11	119185283	C	T	4162	MCAM	-	CDS			exonic	MCAM	.	nonsynonymous SNV	MCAM:NM_006500:exon5:c.G475A:p.A159T	D	D	D	.	D	M	T	D	T	T	D	D	26.2	0.932	0.661	Iossifov;Satterstrom2020	12157.p1	;12157		;5857	;5889	;Male	NA	NA	NA
1083	DDDP110503||11_119206698_G_A	exome	NDD	DD	11_119206698_G_A	11	119206698	G	A	79102	RNF26	+	CDS			exonic	RNF26	.	nonsynonymous SNV	RNF26:NM_032015:exon1:c.G866A:p.R289Q	D	B	B	N	N	L	T	N	T	T	T	N	16.64	0.998	0.996	Heyne_2018	DDDP110503		simplex			male	NA	NA	NA
1084	13547.s1||11_119212596_C_A	exome	control	control	11_119212596_C_A	11	119212596	C	A	114902	C1QTNF5	-	CDS||5'UTR			exonic	MFRP	.	stopgain	MFRP:NM_031433:exon12:c.G1486T:p.E496X	.	.	.	D	A	.	.	.	.	.	.	D	41	0.852	0.914	Krumm	13547.s1						NA	NA	NA
1085	12060.p1||11_119215650_C_T	exome	NDD	autism	11_119215650_C_T	11	119215650	C	T	114902	C1QTNF5	-	CDS||5'UTR			exonic	MFRP	.	nonsynonymous SNV	MFRP:NM_031433:exon6:c.G706A:p.V236I	T	D	P	N	D	L	T	N	T	T	T	D	20.3	-0.899	0.988	Satterstrom2020	12060.p1	12060		12060.fa	12060.mo	Male	NA	NA	NA
1086	14599.p1||11_119230374_C_T	exome	NDD	autism	11_119230374_C_T	11	119230374	C	T	9099	USP2	-	intron			intronic	USP2	.	.	.	.	.	.	.	.	.	.	.	.	.	.	.	.	.	.	Iossifov;Satterstrom2020	14599.p1	;14599		;14599.fa	;14599.mo	;Male	NA	NA	NA
1087	NDAR_INVFH632MUM_wes1||11_119230854_G_C	exome	NDD	autism	11_119230854_G_C	11	119230854	G	C	9099	USP2	-	intron			intronic	USP2	.	.	.	.	.	.	.	.	.	.	.	.	.	.	.	.	.	.	De_Rubeis_2014	NDAR_INVFH632MUM_wes1	NDAR_INVFH632MUM_wes1		NDAR_INVTP489CUK_wes1	NDAR_INVWW726XXY_wes1	Male	NA	NA	NA
1088	12926.s1||11_119535941_A_G	exome	control	control	11_119535941_A_G	11	119535941	A	G	5818	PVRL1	-	CDS			exonic	NECTIN1	.	nonsynonymous SNV	NECTIN1:NM_002855:exon6:c.T1070C:p.I357T	D	B	B	D	D	L	T	N	T	T	D	D	25.1	1.022	1	Krumm;Satterstrom2020	12926.s1	;12926		;SSC07003	;SSC06999	;Male	NA	NA	NA
1089	DDDP114448||11_11964495_C_T	exome	NDD	DD	11_11964495_C_T	11	11964495	C	T	55031	USP47	+	CDS			exonic	USP47	.	nonsynonymous SNV	USP47:NM_017944:exon19:c.C2723T:p.T908M,USP47:NM_001282659:exon20:c.C2927T:p.T976M,USP47:NM_001330208:exon21:c.C2987T:p.T996M	D	P	B	D	D	N	T	N	T	T	D	D	25.2	0.892	1	Heyne_2018	DDDP114448		simplex			male	NA	NA	NA
1090	14419.s1||11_11969599_G_A	exome	control	control	11_11969599_G_A	11	11969599	G	A	55031	USP47	+	CDS			exonic	USP47	.	nonsynonymous SNV	USP47:NM_017944:exon20:c.G2995A:p.A999T,USP47:NM_001282659:exon21:c.G3199A:p.A1067T,USP47:NM_001330208:exon22:c.G3259A:p.A1087T	T	D	D	N	D	L	D	N	D	D	D	D	25.2	0.12	0.998	Satterstrom2020	14419.s1	14419		36164	36166	Male	NA	NA	NA
1091	e||11_120007964_G_C	exome	NDD	EE	11_120007964_G_C	11	120007964	G	C	23650	TRIM29	-	CDS			exonic	TRIM29	.	nonsynonymous SNV	TRIM29:NM_012101:exon1:c.C776G:p.T259R	D	D	D	D	D	N	T	D	T	T	T	D	24.6	1.048	0.981	Heyne_2018	e		simplex			male	NA	NA	NA
1092	AC02-1140-01||11_120096386_G_C	exome	NDD	autism	11_120096386_G_C	11	120096386	G	C	220323	OAF	+	CDS			exonic	OAF	.	nonsynonymous SNV	OAF:NM_178507:exon2:c.G248C:p.R83P	D	D	D	D	D	M	T	D	T	T	D	D	34	1.048	0.999	DeRubeis2014;Satterstrom2020	AC02-1140-01	;AC02-1140-01		;AC02-1140-02	;AC02-1140-03	;Male	NA	NA	NA
1093	DDDP111885||11_120097670_C_T	exome	NDD	DD	11_120097670_C_T	11	120097670	C	T	220323	OAF	+	CDS			exonic	OAF	.	nonsynonymous SNV	OAF:NM_178507:exon3:c.C512T:p.T171I	T	D	P	D	D	M	T	D	T	T	D	D	24.6	0.935	0.995	Heyne_2018	DDDP111885		simplex			male	NA	NA	NA
1094	ASC_CA_77_A||11_120099765_C_T	exome	NDD	autism	11_120099765_C_T	11	120099765	C	T	220323	OAF	+	CDS			exonic	OAF	.	nonsynonymous SNV	OAF:NM_178507:exon4:c.C736T:p.R246C	D	D	D	D	D	M	T	D	T	T	D	D	35	0.935	1	Satterstrom2020	ASC_CA_77_A	ASC_CA_77_A		ASC_CA_77_P	ASC_CA_77_M	Male	NA	NA	NA
1095	F9720-1||11_120107390_C_T	exome	NDD	autism	11_120107390_C_T	11	120107390	C	T	25833	POU2F3	+	CDS			exonic	POU2F3	.	nonsynonymous SNV	POU2F3:NM_001244682:exon1:c.C8T:p.S3F	.	.	.	.	N	.	.	.	T	D	D	N	8.788	-0.578	0	Satterstrom2020	F9720-1	F9720-1		F9720-3	F9720-2	Female	NA	NA	NA
1096	12063.p1||11_120186139_G_A	exome	NDD	autism	11_120186139_G_A	11	120186139	G	A	25833	POU2F3	+	intron			intronic	POU2F3	.	.	.	.	.	.	.	.	.	.	.	.	.	.	.	.	.	.	Krumm	12063.p1						NA	NA	NA
1097	DDDP117279||11_120327902_T_C	exome	NDD	DD	11_120327902_T_C	11	120327902	T	C	23365	ARHGEF12	+	CDS			exonic	ARHGEF12	.	nonsynonymous SNV	ARHGEF12:NM_001198665:exon22:c.T2075C:p.F692S,ARHGEF12:NM_001301084:exon23:c.T1823C:p.F608S,ARHGEF12:NM_015313:exon23:c.T2132C:p.F711S	D	B	B	N	D	L	T	N	T	T	T	D	21.9	1.061	0.792	Heyne_2018	DDDP117279		simplex			male	NA	NA	NA
1098	09C82563||11_120690516_G_T	exome	NDD	autism	11_120690516_G_T	11	120690516	G	T	2900	GRIK4	+	CDS			exonic	GRIK4	.	nonsynonymous SNV	GRIK4:NM_001282470:exon5:c.G398T:p.R133I,GRIK4:NM_001282473:exon6:c.G398T:p.R133I,GRIK4:NM_014619:exon6:c.G398T:p.R133I	D	D	P	D	D	M	T	D	T	T	T	D	26	0.953	1	DeRubeis2014;Satterstrom2020	09C82563	;09C82563		;09C82561	;09C82562	;Male	NA	NA	NA
1099	DDDP116657||11_120925898_T_A	exome	NDD	DD	11_120925898_T_A	11	120925898	T	A	219899	TBCEL	+	CDS			exonic	TBCEL	.	nonsynonymous SNV	TBCEL:NM_001130047:exon5:c.T593A:p.M198K,TBCEL:NM_152715:exon5:c.T593A:p.M198K	D	P	P	D	D	M	T	N	T	T	T	D	28	1.006	1	Heyne_2018	DDDP116657		simplex			male	NA	NA	NA
1100	12274.p1||11_120926018_G_T	exome	NDD	autism	11_120926018_G_T	11	120926018	G	T	219899	TBCEL	+	intron			splicing	TBCEL	NM_001130047:exon5:c.712+1G>T;NM_152715:exon5:c.712+1G>T	.	.	D	.	.	.	D	.	T	N	T	T	.	D	25.6	0.993	0.994	Krumm;Satterstrom2020	12274.p1	;12274		;12274.fa	;12274.mo	;Male	NA	NA	NA
1101	2033-1||11_120989064_C_T	exome	NDD	schizophrenia	11_120989064_C_T	11	120989064	C	T	7007	TECTA	+	CDS			exonic	TECTA	.	synonymous SNV	TECTA:NM_005422:exon6:c.C840T:p.T280T	.	.	.	.	.	.	.	.	.	.	.	.	.	.	.	Fromer2014	2033-1						NA	NA	NA
1102	DDDP100091||11_120989333_G_A	exome	NDD	DD	11_120989333_G_A	11	120989333	G	A	7007	TECTA	+	CDS			exonic	TECTA	.	nonsynonymous SNV	TECTA:NM_005422:exon6:c.G1109A:p.R370H	D	D	D	D	D	M	T	D	T	T	D	D	32	1.048	0.699	Heyne_2018	DDDP100091		simplex			female	NA	NA	NA
1103	09C87450||11_120996340_C_T	exome	NDD	autism	11_120996340_C_T	11	120996340	C	T	7007	TECTA	+	CDS			exonic	TECTA	.	synonymous SNV	TECTA:NM_005422:exon7:c.C1533T:p.D511D	.	.	.	.	.	.	.	.	.	.	.	.	.	.	.	DeRubeis2014;Satterstrom2020	09C87450	;09C87450		;09C87452	;09C87451	;Male	NA	NA	NA
1104	NDAR_INVJT291VPH_wes1||11_120998556_G_A	exome	NDD	autism	11_120998556_G_A	11	120998556	G	A	7007	TECTA	+	CDS			exonic	TECTA	.	nonsynonymous SNV	TECTA:NM_005422:exon8:c.G1870A:p.A624T	T	B	B	N	N	N	D	N	T	T	T	N	8.169	0.141	0.937	DeRubeis2014;De_Rubeis_2014	NDAR_INVJT291VPH_wes1	;NDAR_INVJT291VPH_wes1		;NDAR_INVLU284CTF_wes1	;NDAR_INVGA717DFK_wes1	;Female	NA	NA	NA
1105	206-04-100546||11_121008709_G_A	exome	NDD	autism	11_121008709_G_A	11	121008709	G	A	7007	TECTA	+	CDS			exonic	TECTA	.	nonsynonymous SNV	TECTA:NM_005422:exon10:c.G3521A:p.R1174Q	T	D	D	D	D	L	T	N	T	T	T	D	25.6	0.953	0.997	Satterstrom2020	206-04-100546	206-04-100546		196-03-100553	195-03-100550	Male	NA	NA	NA
1106	20||11_121028741_C_G	exome	NDD	schizophrenia	11_121028741_C_G	11	121028741	C	G	7007	TECTA	+	CDS			exonic	TECTA	.	nonsynonymous SNV	TECTA:NM_005422:exon13:c.C4497G:p.D1499E	D	D	D	D	D	M	T	D	D	D	D	N	25.1	-0.844	0.986	McCarthy2014	20						NA	NA	NA
1107	13618.p1||11_121039453_G_A	exome	NDD	autism;ASD	11_121039453_G_A	11	121039453	G	A	7007	TECTA	+	CDS			exonic	TECTA	.	nonsynonymous SNV	TECTA:NM_005422:exon19:c.G5818A:p.A1940T	D	P	B	D	D	L	D	N	D	T	D	D	24.4	1.048	0.996	Iossifov;Heyne_2018;SSC_Iossifov_2014	13618.p1	;13618	;simplex	;13618.fa	;13618.mo	;female;Female	NA	NA	NA
1108	12163.p1||11_121039588_A_C	exome	NDD	autism	11_121039588_A_C	11	121039588	A	C	7007	TECTA	+	CDS			exonic	TECTA	.	nonsynonymous SNV	TECTA:NM_005422:exon19:c.A5953C:p.T1985P	T	B	B	D	D	L	D	N	T	T	D	D	17.7	0.15	0.996	Satterstrom2020	12163.p1	12163		12163.fa	12163.mo	Male	NA	NA	NA
1109	123|Lelieveld_123||11_121178072_G_A	exome	NDD	ID;ID	11_121178072_G_A	11	121178072	G	A	6309	SC5DL	+	CDS||3'UTR			exonic	SC5D	.	nonsynonymous SNV	SC5D:NM_001024956:exon5:c.G751A:p.G251S,SC5D:NM_006918:exon5:c.G751A:p.G251S	D	D	P	D	D	M	D	D	D	D	D	D	32	1.048	1	Heyne_2018;Lelieveld2016	123|Lelieveld_123		simplex;			female;	NA	NA	NA
1110	NDAR_INVTN535FUN_wes1||11_121178115_C_T	exome	control	control	11_121178115_C_T	11	121178115	C	T	6309	SC5DL	+	CDS||3'UTR			exonic	SC5D	.	nonsynonymous SNV	SC5D:NM_001024956:exon5:c.C794T:p.P265L,SC5D:NM_006918:exon5:c.C794T:p.P265L	D	P	B	D	D	M	D	D	T	D	D	D	24.4	0.935	0.415	De_Rubeis_2014	NDAR_INVTN535FUN_wes1	NDAR_INVTN535FUN_wes1		NDAR_INVET393FZC_wes1	NDAR_INVBE391NF2_wes1	Female	NA	NA	NA
1111	152315||11_121178120_A_T	exome	NDD	autism	11_121178120_A_T	11	121178120	A	T	6309	SC5DL	+	CDS||3'UTR			exonic	SC5D	.	nonsynonymous SNV	SC5D:NM_001024956:exon5:c.A799T:p.S267C,SC5D:NM_006918:exon5:c.A799T:p.S267C	D	P	B	N	N	M	D	N	T	T	D	D	15.9	0.238	0.148	Satterstrom2020	152315	152315		152437	152438	Male	NA	NA	NA
1112	DDDP117594||11_121367692_A_C	exome	NDD	DD	11_121367692_A_C	11	121367692	A	C	6653	SORL1	+	CDS			exonic	SORL1	.	nonsynonymous SNV	SORL1:NM_003105:exon6:c.A873C:p.E291D	T	D	P	D	N	L	T	N	T	T	T	N	22.2	0.23	1	Heyne_2018	DDDP117594		simplex			male	NA	NA	NA
1113	DDDP112040||11_121383753_G_C	exome	NDD	DD	11_121383753_G_C	11	121383753	G	C	6653	SORL1	+	CDS			exonic	SORL1	.	nonsynonymous SNV	SORL1:NM_003105:exon7:c.G981C:p.W327C	D	D	D	D	D	L	T	D	T	T	D	D	32	1.048	1	Heyne_2018	DDDP112040		simplex			male	NA	NA	NA
1114	13070.s1||11_121424766_A_G	exome	control	control	11_121424766_A_G	11	121424766	A	G	6653	SORL1	+	CDS			exonic	SORL1	.	nonsynonymous SNV	SORL1:NM_003105:exon17:c.A2387G:p.D796G	D	D	P	N	D	M	D	D	D	D	D	D	29.1	1.088	1	Iossifov;Satterstrom2020	13070.s1	;13070		;SSC06445	;SSC06438	;Male	NA	NA	NA
1115	DDDP101104||11_121454256_T_C	exome	NDD	DD	11_121454256_T_C	11	121454256	T	C	6653	SORL1	+	CDS			exonic	SORL1	.	nonsynonymous SNV	SORL1:NM_003105:exon26:c.T3670C:p.C1224R	D	D	D	D	D	H	D	D	D	D	D	D	29.3	1.061	0.948	Heyne_2018	DDDP101104		simplex			male	NA	NA	NA
1116	529||11_121466402_A_G	exome	NDD	ID	11_121466402_A_G	11	121466402	A	G	6653	SORL1	+	CDS			exonic	SORL1	.	synonymous SNV	SORL1:NM_003105:exon32:c.A4440G:p.Q1480Q	.	.	.	.	.	.	.	.	.	.	.	.	.	.	.	Heyne_2018	529		simplex			female	NA	NA	NA
1117	Lelieveld_529||11_121466402_A_G	exome	NDD	ID	11_121466402_A_G	11	121466402	A	G	6653	SORL1	+	CDS			exonic	SORL1	.	synonymous SNV	SORL1:NM_003105:exon32:c.A4440G:p.Q1480Q	.	.	.	.	.	.	.	.	.	.	.	.	.	.	.	Lelieveld2016	Lelieveld_529						NA	NA	NA
1118	12829.s1||11_121493007_T_C	exome	control	control	11_121493007_T_C	11	121493007	T	C	6653	SORL1	+	intron			intronic	SORL1	.	.	.	.	.	.	.	.	.	.	.	.	.	.	.	.	.	.	Satterstrom2020	12829.s1	12829		SSC07197	SSC07105	Male	NA	NA	NA
1119	14088.p1||11_12225938_G_A	exome	NDD	autism	11_12225938_G_A	11	12225938	G	A	9645	MICAL2	+	CDS			exonic	MICAL2	.	nonsynonymous SNV	MICAL2:NM_001282666:exon2:c.G406A:p.D136N,MICAL2:NM_001282667:exon2:c.G406A:p.D136N,MICAL2:NM_001282664:exon3:c.G406A:p.D136N,MICAL2:NM_001282665:exon3:c.G406A:p.D136N,MICAL2:NM_001346292:exon3:c.G406A:p.D136N,MICAL2:NM_001346294:exon3:c.G406A:p.D136N,MICAL2:NM_001346298:exon3:c.G406A:p.D136N,MICAL2:NM_001282663:exon4:c.G406A:p.D136N,MICAL2:NM_001282668:exon4:c.G406A:p.D136N,MICAL2:NM_001346293:e…	D	D	D	D	D	L	T	D	T	T	D	D	32	1.048	0.981	Iossifov;Satterstrom2020	14088.p1	;14088		;SSC10382	;SSC10062	;Male	NA	NA	NA
1120	14384.s1||11_12247918_G_A	exome	control	control	11_12247918_G_A	11	12247918	G	A	9645	MICAL2	+	intron			splicing	MICAL2	NM_001346296:exon14:c.1888+1G>A;NM_001346298:exon13:c.1888+1G>A;NM_001346297:exon14:c.1888+1G>A;NM_001346292:exon13:c.1888+1G>A;NM_001346295:exon14:c.1888+1G>A;NM_001346293:exon14:c.1888+1G>A;NM_001346294:exon13:c.1888+1G>A;NM_001346299:exon14:c.1888+1G>A;NM_014632:exon14:c.1888+1G>A;NM_001282663:exon14:c.1888+1G>A;NM_001282664:exon13:c.1888+1G>A;NM_001282665:exon13:c.1888+1G>A;NM_001282666:exon1…	.	.	.	.	.	.	D	.	.	.	.	.	.	D	26	1.048	0.763	Iossifov;Satterstrom2020	14384.s1	;14384		;36140	;36142	;Female	NA	NA	NA
1121	DDDP118531||11_122647895_A_G	exome	NDD	DD	11_122647895_A_G	11	122647895	A	G	84959	UBASH3B	+	CDS			exonic	UBASH3B	.	nonsynonymous SNV	UBASH3B:NM_032873:exon3:c.A379G:p.I127V	T	B	B	D	D	L	T	N	T	T	T	D	15.14	1.199	1	Heyne_2018	DDDP118531		simplex			female	NA	NA	NA
1122	80001101240||11_122667571_G_A	exome	NDD	autism	11_122667571_G_A	11	122667571	G	A	84959	UBASH3B	+	intron			intronic	UBASH3B	.	.	.	.	.	.	.	.	.	.	.	.	.	.	.	.	.	.	Satterstrom2020	80001101240	80001101240		80001101240-2	80001101240-1	Female	NA	NA	NA
1123	12009.p1||11_12278507_A_G	exome	NDD	autism	11_12278507_A_G	11	12278507	A	G	9645	MICAL2	+	CDS			exonic	MICAL2	.	nonsynonymous SNV	MICAL2:NM_001282667:exon16:c.A2390G:p.D797G,MICAL2:NM_001282666:exon17:c.A2453G:p.D818G,MICAL2:NM_001282665:exon19:c.A2561G:p.D854G,MICAL2:NM_001282664:exon22:c.A3068G:p.D1023G,MICAL2:NM_001346294:exon22:c.A3068G:p.D1023G,MICAL2:NM_001346298:exon22:c.A3068G:p.D1023G,MICAL2:NM_001346292:exon23:c.A3131G:p.D1044G,MICAL2:NM_001346293:exon23:c.A3068G:p.D1023G,MICAL2:NM_001346295:exon23:c.A3068G:p.D102…	D	D	P	D	D	L	D	D	D	D	D	D	26.3	1.199	0.014	Iossifov;Satterstrom2020	12009.p1	;12009		;SSC03877	;SSC03873	;Male	NA	NA	NA
1124	4205-1||11_122929444_T_C	exome	NDD	schizophrenia	11_122929444_T_C	11	122929444	T	C	3312	HSPA8	-	CDS			exonic	HSPA8	.	nonsynonymous SNV	HSPA8:NM_006597:exon7:c.A1418G:p.Q473R	D	B	B	N	D	M	T	D	T	T	D	D	26.6	0.961	0.999	Fromer2014	4205-1						NA	NA	NA
1125	4205-1||11_122929804_G_C	exome	NDD	schizophrenia	11_122929804_G_C	11	122929804	G	C	3312	HSPA8	-	CDS			exonic	HSPA8	.	nonsynonymous SNV	HSPA8:NM_006597:exon6:c.C1286G:p.T429S,HSPA8:NM_153201:exon6:c.C1286G:p.T429S	T	B	B	D	D	N	T	N	T	T	T	D	16.08	0.949	0.998	Fromer2014	4205-1						NA	NA	NA
1126	14502.p1||11_123477359_G_A	exome	NDD	ASD;autism	11_123477359_G_A	11	123477359	G	A	57476	GRAMD1B	+	CDS			exonic	GRAMD1B	.	nonsynonymous SNV	GRAMD1B:NM_001286564:exon10:c.G817A:p.G273R,GRAMD1B:NM_020716:exon10:c.G937A:p.G313R,GRAMD1B:NM_001286563:exon11:c.G958A:p.G320R,GRAMD1B:NM_001330396:exon11:c.G817A:p.G273R	T	D	B	N	D	L	T	N	T	T	T	N	18.66	0.953	0.989	Heyne_2018;Satterstrom2020	14502.p1	;14502	simplex;	;36204	;36206	female;Female	NA	NA	NA
1127	13070.p1||11_123479238_G_A	exome	NDD	autism	11_123479238_G_A	11	123479238	G	A	57476	GRAMD1B	+	CDS			intronic	GRAMD1B	.	.	.	D	B	B	.	N	.	T	N	T	T	D	N	0.174	-2.88	0	Satterstrom2020	13070.p1	13070		SSC06445	SSC06438	Male	NA	NA	NA
1128	09C81990||11_12348705_A_T	exome	NDD	autism	11_12348705_A_T	11	12348705	A	T	84953	MICALCL	+	intron			intronic	MICALCL	.	.	.	.	.	.	.	.	.	.	.	.	.	.	.	.	.	.	Satterstrom2020	09C81990	09C81990		09C81994	09C81989	Female	NA	NA	NA
1129	F5980-4||11_123509032_G_A	exome	NDD	autism	11_123509032_G_A	11	123509032	G	A	55800	SCN3B	-	CDS			exonic	SCN3B	.	nonsynonymous SNV	SCN3B:NM_018400:exon4:c.C446T:p.A149V,SCN3B:NM_001040151:exon5:c.C446T:p.A149V	D	D	P	D	D	M	D	N	D	D	.	D	25.6	1.045	0.067	Satterstrom2020	F5980-4	F5980-4		F5980-3	F5980-2	Male	NA	NA	NA
1130	13057.s1||11_123601589_G_T	exome	control	control	11_123601589_G_T	11	123601589	G	T	7753	ZNF202	-	CDS||5'UTR			exonic	ZNF202	.	nonsynonymous SNV	ZNF202:NM_001301780:exon2:c.C8A:p.T3K,ZNF202:NM_001301779:exon3:c.C8A:p.T3K,ZNF202:NM_003455:exon4:c.C8A:p.T3K	D	B	B	D	D	M	T	N	T	T	T	D	25.5	1.048	1	Satterstrom2020	13057.s1	13057		SSC06671	SSC06662	Female	NA	NA	NA
1131	13166.p1||11_123625178_C_G	exome	NDD	autism	11_123625178_C_G	11	123625178	C	G	390260	OR6X1	-	CDS			exonic	OR6X1	.	nonsynonymous SNV	OR6X1:NM_001005188:exon1:c.G49C:p.V17L	D	B	B	.	N	N	T	N	T	T	T	N	11.66	0.892	0.017	Krumm;Satterstrom2020	13166.p1	;13166		;SSC06783	;SSC06777	;Male	NA	NA	NA
1132	11017.s1||11_123676657_A_G	exome	control	control	11_123676657_A_G	11	123676657	A	G	390261	OR6M1	-	CDS			exonic	OR6M1	.	nonsynonymous SNV	OR6M1:NM_001005325:exon1:c.T401C:p.M134T	D	P	P	U	N	H	T	D	T	T	T	D	22.9	0.801	0.842	Iossifov;Satterstrom2020	11017.s1	;11017		;11017.fa	;11017.mo	;Female	NA	NA	NA
1133	09C98146||11_12371396_C_G	exome	NDD	autism	11_12371396_C_G	11	12371396	C	G	84953	MICALCL	+	CDS			exonic	MICALCL	.	nonsynonymous SNV	MICALCL:NM_032867:exon7:c.C1741G:p.Q581E	T	P	P	U	N	L	T	N	T	T	T	D	22	0.852	0.999	DeRubeis2014;Satterstrom2020	09C98146	;09C98146		;09C98145	;09C98144	;Male	NA	NA	NA
1134	AU116A||11_123755176_T_A	exome	NDD	autism	11_123755176_T_A	11	123755176	T	A	338661	TMEM225	-	intron			intronic	TMEM225	.	.	.	.	.	.	.	.	.	.	.	.	.	.	.	.	.	.	Satterstrom2020	AU116A	AU116A		AU116B	AU116C	Male	NA	NA	NA
1135	DDDP113444||11_123810834_C_T	exome	NDD	DD	11_123810834_C_T	11	123810834	C	T	219875	OR4D5	+	CDS			exonic	OR4D5	.	nonsynonymous SNV	OR4D5:NM_001001965:exon1:c.C511T:p.P171S	D	D	D	D	D	L	T	D	T	T	T	D	25.7	0.908	0.993	Heyne_2018	DDDP113444		simplex			female	NA	NA	NA
1136	ck||11_123847971_G_C	exome	NDD	EE	11_123847971_G_C	11	123847971	G	C	219873	OR10S1	-	CDS			exonic	OR10S1	.	nonsynonymous SNV	OR10S1:NM_001004474:exon1:c.C428G:p.P143R	D	D	D	U	D	H	T	D	T	T	T	D	25.7	0.851	0.995	Heyne_2018	ck		simplex			male	NA	NA	NA
1137	DDDP111204||11_123886946_G_A	exome	NDD	DD	11_123886946_G_A	11	123886946	G	A	390264	OR10G4	+	CDS			exonic	OR10G4	.	nonsynonymous SNV	OR10G4:NM_001004462:exon1:c.G665A:p.C222Y	T	B	B	N	N	N	T	N	T	T	T	N	0.357	0.881	0.995	Heyne_2018	DDDP111204		simplex			female	NA	NA	NA
1138	F9602-1||11_123900352_C_T	exome	NDD	autism	11_123900352_C_T	11	123900352	C	T	219869	OR10G8	+	CDS			exonic	OR10G8	.	nonsynonymous SNV	OR10G8:NM_001004464:exon1:c.C23T:p.T8I	D	P	P	D	N	M	T	D	T	T	T	N	23.1	-0.072	0	Satterstrom2020	F9602-1	F9602-1		F9602-3	F9602-2	Female	NA	NA	NA
1139	13999.p1||11_124120446_A_C	exome	NDD	autism;ASD	11_124120446_A_C	11	124120446	A	C	26494	OR8G1	+	CDS			exonic	OR8G1	.	unknown	UNKNOWN	.	.	.	.	.	.	.	.	.	.	.	.	.	.	.	Iossifov;Heyne_2018;Satterstrom2020	13999.p1	;13999	;simplex	;13999.fa	;13999.mo	;male;Male	NA	NA	NA
1140	13777.s1||11_124252698_A_G	exome	control	control	11_124252698_A_G	11	124252698	A	G	26595	OR8B2	-	CDS			exonic	OR8B2	.	nonsynonymous SNV	OR8B2:NM_001005468:exon1:c.T542C:p.I181T	D	D	D	D	N	M	T	D	T	T	T	N	25.7	0.961	0.96	Krumm	13777.s1						NA	NA	NA
1141	EGAN00001100985||11_1244474_T_G	exome	NDD	autism	11_1244474_T_G	11	1244474	T	G	727897	MUC5B	+	intron			intronic	MUC5B	.	.	.	.	.	.	.	.	.	.	.	.	.	.	.	.	.	.	Satterstrom2020	EGAN00001100985	EGAN00001100985		EGAN00001101286	EGAN00001101293	Male	NA	NA	NA
1142	EGAN00001101030||11_1244474_T_G	exome	NDD	autism	11_1244474_T_G	11	1244474	T	G	727897	MUC5B	+	intron			intronic	MUC5B	.	.	.	.	.	.	.	.	.	.	.	.	.	.	.	.	.	.	Satterstrom2020	EGAN00001101030	EGAN00001101030		EGAN00001101111	EGAN00001101054	Male	NA	NA	NA
1143	DDDP110991||11_124494858_G_A	exome	NDD	DD	11_124494858_G_A	11	124494858	G	A	84897	TBRG1	+	CDS||5'UTR			exonic	TBRG1	.	nonsynonymous SNV	TBRG1:NM_032811:exon2:c.G182A:p.R61H	T	B	B	D	D	L	D	N	T	T	T	D	23.1	0.953	1	Heyne_2018	DDDP110991		simplex			male	NA	NA	NA
1144	13574.p1||11_124619772_A_C	exome	NDD	autism	11_124619772_A_C	11	124619772	A	C	23584	VSIG2	-	intron	Simple_repeat	1	intronic	VSIG2	.	.	.	.	.	.	.	.	.	.	.	.	.	.	.	.	.	.	Krumm	13574.p1						NA	NA	NA
1145	13574.s1||11_124619772_A_C	exome	control	control	11_124619772_A_C	11	124619772	A	C	23584	VSIG2	-	intron	Simple_repeat	1	intronic	VSIG2	.	.	.	.	.	.	.	.	.	.	.	.	.	.	.	.	.	.	Krumm	13574.s1						NA	NA	NA
1146	12019.p1||11_124637785_G_A	exome	NDD	autism	11_124637785_G_A	11	124637785	G	A	79684	MSANTD2	-	CDS			exonic	MSANTD2	.	nonsynonymous SNV	MSANTD2:NM_001312920:exon3:c.C277T:p.R93C,MSANTD2:NM_001308027:exon4:c.C967T:p.R323C,MSANTD2:NM_001312921:exon4:c.C277T:p.R93C,MSANTD2:NM_024631:exon4:c.C811T:p.R271C	D	D	D	N	D	L	.	D	T	T	T	D	32	0.998	0.999	Krumm;Satterstrom2020	12019.p1	;12019		;SSC03786	;SSC03782	;Male	NA	NA	NA
1147	13764.s1||11_124738713_C_G	exome	control	control	11_124738713_C_G	11	124738713	C	G	64221	ROBO3	+	CDS			exonic	ROBO3	.	nonsynonymous SNV	ROBO3:NM_022370:exon2:c.C176G:p.P59R	T	P	P	N	N	L	T	N	T	T	D	N	23.6	0.852	0.526	Krumm;Satterstrom2020	13764.s1	;13764		;SSC08618	;SSC08612	;Male	NA	NA	NA
1148	DDDP102070||11_124742959_G_A	exome	NDD	DD	11_124742959_G_A	11	124742959	G	A	64221	ROBO3	+	CDS			exonic	ROBO3	.	nonsynonymous SNV	ROBO3:NM_022370:exon9:c.G1510A:p.G504S	D	D	D	N	D	L	T	D	T	T	T	D	27.6	1.048	0.138	Heyne_2018	DDDP102070		simplex			male	NA	NA	NA
1149	12561.s1||11_124742963_C_T	exome	control	control	11_124742963_C_T	11	124742963	C	T	64221	ROBO3	+	CDS			exonic	ROBO3	.	nonsynonymous SNV	ROBO3:NM_022370:exon9:c.C1514T:p.T505I	D	D	P	N	D	L	T	D	T	T	D	D	24.3	0.04	0.057	Iossifov;SSC_Iossifov_2014	12561.s1	;12561		;12561.fa	;12561.mo	;Female	NA	NA	NA
1150	G01-GEA-169-HI||11_124743745_A_G	exome	NDD	autism	11_124743745_A_G	11	124743745	A	G	64221	ROBO3	+	CDS			exonic	ROBO3	.	nonsynonymous SNV	ROBO3:NM_022370:exon11:c.A1771G:p.I591V	T	P	P	D	D	L	T	N	T	T	T	D	14.37	1.199	0.981	Satterstrom2020	G01-GEA-169-HI	G01-GEA-169-HI		G01-GEA-169-PA	G01-GEA-169-MA	Male	NA	NA	NA
1151	12821.p1||11_124747997_G_A	exome	NDD	autism	11_124747997_G_A	11	124747997	G	A	64221	ROBO3	+	CDS||5'UTR||3'UTR			exonic	ROBO3	.	nonsynonymous SNV	ROBO3:NM_022370:exon21:c.G3151A:p.A1051T	D	D	P	N	D	M	T	N	T	T	D	N	24.4	0.953	0.978	Krumm;Satterstrom2020	12821.p1	;12821		;SSC06077	;SSC05936	;Male	NA	NA	NA
1152	13949.s1||11_124749756_C_T	exome	control	control	11_124749756_C_T	11	124749756	C	T	64221	ROBO3	+	CDS			exonic	ROBO3	.	synonymous SNV	ROBO3:NM_022370:exon26:c.C3870T:p.S1290S	.	.	.	.	.	.	.	.	.	.	.	.	.	.	.	Satterstrom2020	13949.s1	13949		13949.mo	13949.s1	Female	NA	NA	NA
1153	12952.s1||11_124754806_G_A	exome	control	control	11_124754806_G_A	11	124754806	G	A	54538	ROBO4	-	CDS			exonic	ROBO4	.	nonsynonymous SNV	ROBO4:NM_001301088:exon18:c.C2570T:p.S857F,ROBO4:NM_019055:exon18:c.C3005T:p.S1002F	D	B	B	.	N	M	T	N	T	T	T	N	23.7	0.953	0.322	Iossifov;Satterstrom2020	12952.s1	;12952		;SSC07155	;SSC07147	;Female	NA	NA	NA
1154	14284.p1||11_124761588_C_T	exome	NDD	autism	11_124761588_C_T	11	124761588	C	T	54538	ROBO4	-	CDS			exonic	ROBO4	.	nonsynonymous SNV	ROBO4:NM_001301088:exon11:c.G1223A:p.R408Q,ROBO4:NM_019055:exon11:c.G1658A:p.R553Q	T	D	B	N	N	M	T	N	T	T	D	D	24	0.935	0.582	Iossifov;Satterstrom2020	14284.p1	;14284		;37364	;37366	;Male	NA	NA	NA
1155	DDDP100118||11_124789811_C_A	exome	NDD	DD	11_124789811_C_A	11	124789811	C	A	641654	HEPN1	+	CDS			exonic	HEPN1	.	nonsynonymous SNV	HEPN1:NM_001037558:exon1:c.C165A:p.H55Q	.	B	B	.	N	.	T	D	T	T	T	N	14.69	0.892	0.002	Heyne_2018	DDDP100118		simplex			male	NA	NA	NA
1156	119_proband||11_124793786_T_C	exome	NDD	bipolar_type1	11_124793786_T_C	11	124793786	T	C	220296	HEPACAM	-	CDS			exonic	HEPACAM	.	nonsynonymous SNV	HEPACAM:NM_152722:exon3:c.A548G:p.D183G	T	B	B	D	D	N	T	N	T	T	D	D	13.34	1.058	0.99	Kataoka2016	119_proband						NA	NA	NA
1157	380||11_124793829_A_G	exome	NDD	ID	11_124793829_A_G	11	124793829	A	G	220296	HEPACAM	-	CDS			exonic	HEPACAM	.	nonsynonymous SNV	HEPACAM:NM_152722:exon3:c.T505C:p.S169P	D	B	B	N	D	L	T	D	T	T	D	D	26.3	1.194	0.989	Heyne_2018	380		simplex			male	NA	NA	NA
1158	Lelieveld_380||11_124793829_A_G	exome	NDD	ID	11_124793829_A_G	11	124793829	A	G	220296	HEPACAM	-	CDS			exonic	HEPACAM	.	nonsynonymous SNV	HEPACAM:NM_152722:exon3:c.T505C:p.S169P	D	B	B	N	D	L	T	D	T	T	D	D	26.3	1.194	0.989	Lelieveld2016	Lelieveld_380						NA	NA	NA
1159	11185.p1||11_124794777_G_A	exome	NDD	autism	11_124794777_G_A	11	124794777	G	A	220296	HEPACAM	-	CDS			exonic	HEPACAM	.	nonsynonymous SNV	HEPACAM:NM_152722:exon2:c.C274T:p.R92W	D	D	D	D	D	M	T	D	T	T	D	D	29.2	-0.321	0.982	Iossifov;Satterstrom2020	11185.p1	;11185		;SSC00500	;SSC00499	;Male	NA	NA	NA
1160	87_de_Ligt|deLigt87||11_124829880_T_G	exome	NDD	ID;ID	11_124829880_T_G	11	124829880	T	G	80071	CCDC15	+	CDS			exonic	CCDC15	.	nonsynonymous SNV	CCDC15:NM_025004:exon4:c.T497G:p.F166C	D	D	D	N	N	M	T	D	T	T	T	D	28.8	1.061	0.364	Heyne_2018;deLigt2012	87_de_Ligt|deLigt87		simplex;			female;	NA	NA	NA
1161	11773.s1||11_124857453_A_G	exome	control	control	11_124857453_A_G	11	124857453	A	G	80071	CCDC15	+	CDS			exonic	CCDC15	.	nonsynonymous SNV	CCDC15:NM_025004:exon8:c.A1331G:p.Y444C	T	B	B	.	N	N	T	N	T	T	T	N	2.901	-0.485	0.006	Iossifov;Satterstrom2020	11773.s1	;11773		;5834	;5866	;Male	NA	NA	NA
1162	14337.s1||11_124950640_G_A	exome	control	control	11_124950640_G_A	11	124950640	G	A	219855	SLC37A2	+	CDS			exonic	SLC37A2	.	nonsynonymous SNV	SLC37A2:NM_001145290:exon7:c.G658A:p.V220I,SLC37A2:NM_198277:exon7:c.G658A:p.V220I	T	B	B	N	N	N	T	N	T	T	.	N	0.01	-0.656	0.001	Iossifov	14337.s1						NA	NA	NA
1163	DDDP107907||11_124955360_G_A	exome	NDD	DD	11_124955360_G_A	11	124955360	G	A	219855	SLC37A2	+	CDS			exonic	SLC37A2	.	nonsynonymous SNV	SLC37A2:NM_001145290:exon15:c.G1318A:p.G440S,SLC37A2:NM_198277:exon15:c.G1318A:p.G440S	D	D	D	D	D	M	T	D	D	T	D	D	33	1.048	0.738	Heyne_2018	DDDP107907		simplex			female	NA	NA	NA
1164	12647.s1||11_124971114_G_A	exome	control	control	11_124971114_G_A	11	124971114	G	A	219854	TMEM218	-	CDS			exonic	TMEM218	.	nonsynonymous SNV	TMEM218:NM_001080546:exon4:c.C196T:p.P66S,TMEM218:NM_001258238:exon4:c.C196T:p.P66S,TMEM218:NM_001258239:exon4:c.C301T:p.P101S,TMEM218:NM_001258242:exon4:c.C301T:p.P101S,TMEM218:NM_001258244:exon4:c.C196T:p.P66S,TMEM218:NM_001258246:exon4:c.C301T:p.P101S,TMEM218:NM_001258247:exon4:c.C196T:p.P66S,TMEM218:NM_001258241:exon5:c.C196T:p.P66S,TMEM218:NM_001258243:exon5:c.C301T:p.P101S,TMEM218:NM_001258…	D	D	P	D	D	M	.	D	T	T	T	D	26.4	0.953	0.966	Iossifov;Satterstrom2020	12647.s1	;12647		;SSC05525	;SSC05422	;Male	NA	NA	NA
1165	NDAR_INVWL738LDP_wes1||11_125281736_G_A	exome	NDD	autism	11_125281736_G_A	11	125281736	G	A	63876	PKNOX2	+	CDS			exonic	PKNOX2	.	nonsynonymous SNV	PKNOX2:NM_022062:exon10:c.G911A:p.R304H	D	D	D	D	D	M	D	D	D	D	D	D	34	0.953	1	DeRubeis2014;De_Rubeis_2014	NDAR_INVWL738LDP_wes1	;NDAR_INVWL738LDP_wes1		;NDAR_INVTB296FVH_wes1	;NDAR_INVGX498LK0_wes1	;Female	NA	NA	NA
1166	14092.p1||11_125298961_C_T	exome	NDD	autism;ASD	11_125298961_C_T	11	125298961	C	T	63876	PKNOX2	+	CDS			exonic	PKNOX2	.	synonymous SNV	PKNOX2:NM_022062:exon11:c.C990T:p.L330L	.	.	.	.	.	.	.	.	.	.	.	.	.	.	.	Iossifov;Heyne_2018;Satterstrom2020	14092.p1	;14092	;simplex	;14092.fa	;14092.mo	;male;Male	NA	NA	NA
1167	11078.p1||11_1253773_C_A	exome	NDD	autism;ASD	11_1253773_C_A	11	1253773	C	A	727897	MUC5B	+	CDS			exonic	MUC5B	.	stopgain	MUC5B:NM_002458:exon16:c.C1937A:p.S646X	.	.	.	.	A	.	.	.	.	.	.	N	36	-0.445	0.776	Iossifov;Heyne_2018;SSC_Iossifov_2014	11078.p1	;11078	;simplex	;11078.fa	;11078.mo	;male;Male	NA	NA	NA
1168	12260.p1||11_125446102_T_C	exome	NDD	autism	11_125446102_T_C	11	125446102	T	C	9538	EI24	+	intron			ncRNA_intronic	STT3A-AS1	.	.	.	.	.	.	.	.	.	.	.	.	.	.	.	.	.	.	Satterstrom2020	12260.p1	12260		12260.fa	12260.mo	Male	NA	NA	NA
1169	DDDP100727||11_125448034_C_T	exome	NDD	DD	11_125448034_C_T	11	125448034	C	T	9538	EI24	+	CDS			exonic	EI24	.	nonsynonymous SNV	EI24:NM_001330419:exon7:c.C322T:p.P108S	T	P	P	D	D	L	.	N	T	T	T	D	19.24	0.935	0.976	Heyne_2018	DDDP100727		simplex			male	NA	NA	NA
1170	14242.s1||11_125472886_T_C	exome	control	control	11_125472886_T_C	11	125472886	T	C	3703	STT3A	+	intron			intronic	STT3A	.	.	.	.	.	.	.	.	.	.	.	.	.	.	.	.	.	.	Satterstrom2020	14242.s1	14242		SSC11004	SSC11002	Male	NA	NA	NA
1171	14664.s1||11_125475475_C_T	exome	control	control	11_125475475_C_T	11	125475475	C	T	3703	STT3A	+	intron	SINE	1	intronic	STT3A	.	.	.	.	.	.	.	.	.	.	.	.	.	.	.	.	.	.	Satterstrom2020	14664.s1	14664		37325	37327	Female	NA	NA	NA
1172	12967.p1||11_125482491_G_A	exome	NDD	autism	11_125482491_G_A	11	125482491	G	A	3703	STT3A	+	CDS			exonic	STT3A	.	nonsynonymous SNV	STT3A:NM_001278504:exon11:c.G938A:p.R313H,STT3A:NM_152713:exon12:c.G1214A:p.R405H,STT3A:NM_001278503:exon13:c.G1214A:p.R405H	D	D	D	D	D	H	.	D	D	D	D	D	34	1.048	0.996	Iossifov;Satterstrom2020	12967.p1	;12967		;SSC06781	;SSC12192	;Male	NA	NA	NA
1173	NDAR_INVTF535UK6_wes1||11_125490713_G_A	exome	NDD	autism	11_125490713_G_A	11	125490713	G	A	3703	STT3A	+	3'UTR			UTR3	STT3A	NM_152713:c.*8G>A;NM_001278503:c.*8G>A;NM_001278504:c.*8G>A	.	.	.	.	.	.	.	.	.	.	.	.	.	.	.	.	.	De_Rubeis_2014	NDAR_INVTF535UK6_wes1	NDAR_INVTF535UK6_wes1		NDAR_INVPB694CEZ_wes1	NDAR_INVMJ090UXG_wes1	Male	NA	NA	NA
1174	08C75637||11_125505331_A_G	exome	NDD	autism	11_125505331_A_G	11	125505331	A	G	1111	CHEK1	+	CDS			exonic	CHEK1	.	synonymous SNV	CHEK1:NM_001330427:exon6:c.A669G:p.P223P,CHEK1:NM_001330428:exon6:c.A339G:p.P113P,CHEK1:NM_001114121:exon7:c.A621G:p.P207P,CHEK1:NM_001114122:exon7:c.A621G:p.P207P,CHEK1:NM_001244846:exon7:c.A621G:p.P207P,CHEK1:NM_001274:exon7:c.A621G:p.P207P	.	.	.	.	.	.	.	.	.	.	.	.	.	.	.	Satterstrom2020	08C75637	08C75637		08C75638	08C75726	Male	NA	NA	NA
1175	3023_15au||11_125513726_A_G	exome	NDD	autism	11_125513726_A_G	11	125513726	A	G	1111	CHEK1	+	CDS			exonic	CHEK1	.	nonsynonymous SNV	CHEK1:NM_001330427:exon8:c.A902G:p.E301G,CHEK1:NM_001330428:exon8:c.A572G:p.E191G,CHEK1:NM_001114121:exon9:c.A854G:p.E285G,CHEK1:NM_001114122:exon9:c.A854G:p.E285G,CHEK1:NM_001244846:exon9:c.A854G:p.E285G,CHEK1:NM_001274:exon9:c.A854G:p.E285G	T	B	B	N	D	N	T	N	T	T	T	D	14.43	1.199	0.362	Satterstrom2020	3023_15au	3023_15au		3019_15au	3016_15au	Male	NA	NA	NA
1176	DDDP106760||11_125514040_C_A	exome	NDD	DD	11_125514040_C_A	11	125514040	C	A	1111	CHEK1	+	CDS			exonic	CHEK1	.	synonymous SNV	CHEK1:NM_001330427:exon9:c.C1026A:p.S342S,CHEK1:NM_001330428:exon9:c.C696A:p.S232S,CHEK1:NM_001114121:exon10:c.C978A:p.S326S,CHEK1:NM_001114122:exon10:c.C978A:p.S326S,CHEK1:NM_001244846:exon10:c.C978A:p.S326S,CHEK1:NM_001274:exon10:c.C978A:p.S326S	.	.	.	.	.	.	.	.	.	.	.	.	.	.	.	Heyne_2018	DDDP106760		simplex			female	NA	NA	NA
1177	14211.p1||11_125648663_A_G	exome	NDD	autism;ASD	11_125648663_A_G	11	125648663	A	G	399967	PATE2	-	CDS			exonic	PATE2	.	synonymous SNV	PATE2:NM_212555:exon1:c.T6C:p.L2L	.	.	.	.	.	.	.	.	.	.	.	.	.	.	.	Iossifov;Heyne_2018;Satterstrom2020	14211.p1	;14211	;simplex	;14211.fa	;14211.mo	;male;Male	NA	NA	NA
1178	AU167A||11_125765418_C_G	exome	NDD	autism	11_125765418_C_G	11	125765418	C	G	83480	PUS3	-	CDS			exonic	PUS3	.	nonsynonymous SNV	PUS3:NM_001271985:exon2:c.G21C:p.K7N,PUS3:NM_031307:exon3:c.G645C:p.K215N	T	P	P	D	D	M	T	N	T	T	D	D	15.01	-0.354	0.992	DeRubeis2014;Satterstrom2020	AU167A	;AU167A		;AU167B	;AU167C	;Male	NA	NA	NA
1179	11542.s1||11_125791158_A_G	exome	control	control	11_125791158_A_G	11	125791158	A	G	29118	DDX25	+	CDS			exonic	DDX25	.	nonsynonymous SNV	DDX25:NM_001330438:exon11:c.A932G:p.Y311C,DDX25:NM_013264:exon11:c.A1274G:p.Y425C	T	D	P	D	D	N	T	N	T	T	D	D	24.3	1.088	1	Satterstrom2020	11542.s1	11542		35860	35862	Female	NA	NA	NA
1180	13036.s1||11_1258166_C_T	exome	control	control	11_1258166_C_T	11	1258166	C	T	727897	MUC5B	+	CDS			exonic	MUC5B	.	synonymous SNV	MUC5B:NM_002458:exon25:c.C3069T:p.C1023C	.	.	.	.	.	.	.	.	.	.	.	.	.	.	.	Satterstrom2020	13036.s1	13036		SSC06213	SSC06208	Female	NA	NA	NA
1181	AU065A||11_125831706_G_A	exome	NDD	autism	11_125831706_G_A	11	125831706	G	A	50937	CDON	-	CDS			exonic	CDON	.	nonsynonymous SNV	CDON:NM_001243597:exon19:c.C3544T:p.P1182S,CDON:NM_016952:exon19:c.C3544T:p.P1182S	D	B	B	D	N	L	T	N	T	T	D	N	5.665	0.985	0.002	DeRubeis2014;Satterstrom2020	AU065A	;AU065A		;AU065B	;AU065C	;Male	NA	NA	NA
1182	ASDFI_1124||11_125864185_C_T	exome	NDD	autism	11_125864185_C_T	11	125864185	C	T	50937	CDON	-	CDS			exonic	CDON	.	nonsynonymous SNV	CDON:NM_001243597:exon14:c.G2644A:p.V882I,CDON:NM_016952:exon14:c.G2644A:p.V882I	D	D	D	D	D	L	T	N	T	T	T	D	33	0.892	0.974	DeRubeis2014;Satterstrom2020	ASDFI_1124	;ASDFI_1124		;ASDFI_1125	;ASDFI_1126	;Male	NA	NA	NA
1183	DEASD_0445_001||11_125871738_T_C	exome	NDD	autism	11_125871738_T_C	11	125871738	T	C	50937	CDON	-	CDS			exonic	CDON	.	synonymous SNV	CDON:NM_001243597:exon11:c.A2034G:p.T678T,CDON:NM_016952:exon11:c.A2034G:p.T678T	.	.	.	.	.	.	.	.	.	.	.	.	.	.	.	DeRubeis2014;Satterstrom2020	DEASD_0445_001	;DEASD_0445_001		;DEASD_0445_500	;DEASD_0445_600	;Female	NA	NA	NA
1184	Fam_113899||11_125873867_T_G	exome	NDD	E_NDD	11_125873867_T_G	11	125873867	T	G	50937	CDON	-	CDS			exonic	CDON	.	nonsynonymous SNV	CDON:NM_001243597:exon10:c.A1956C:p.E652D,CDON:NM_016952:exon10:c.A1956C:p.E652D	D	D	D	D	D	M	T	N	T	T	D	D	26.1	0.146	0.992	Heyne_2018	Fam_113899		simplex			male	NA	NA	NA
1185	58290612||11_125885378_T_C	exome	NDD	tourette_syndrome	11_125885378_T_C	11	125885378	T	C	50937	CDON	-	CDS			exonic	CDON	.	nonsynonymous SNV	CDON:NM_001243597:exon7:c.A956G:p.Q319R,CDON:NM_016952:exon7:c.A956G:p.Q319R	T	B	B	N	N	N	T	N	T	T	T	N	11.66	1.061	0.856	Willsey2017	58290612						NA	NA	NA
1186	12161.p1||11_125891290_A_G	exome	NDD	autism	11_125891290_A_G	11	125891290	A	G	50937	CDON	-	CDS			exonic	CDON	.	synonymous SNV	CDON:NM_001243597:exon3:c.T202C:p.L68L,CDON:NM_016952:exon3:c.T202C:p.L68L	.	.	.	.	.	.	.	.	.	.	.	.	.	.	.	Iossifov;Satterstrom2020	12161.p1	;12161		;6752	;6206	;Female	NA	NA	NA
1187	09C84847||11_125891438_T_C	exome	NDD	autism	11_125891438_T_C	11	125891438	T	C	50937	CDON	-	intron			intronic	CDON	.	.	.	.	.	.	.	.	.	.	.	.	.	.	.	.	.	.	Satterstrom2020	09C84847	09C84847		09C84849	09C84848	Male	NA	NA	NA
1188	12086.p1||11_126134982_C_T	exome	NDD	autism	11_126134982_C_T	11	126134982	C	T	6734	SRPR	-	CDS			exonic	SRPRA	.	nonsynonymous SNV	SRPRA:NM_001177842:exon10:c.G1313A:p.R438H,SRPRA:NM_003139:exon11:c.G1397A:p.R466H	D	D	D	D	D	M	.	D	T	T	T	D	35	0.935	0.991	SSC_Iossifov_2014	12086.p1	12086		12086.fa	12086.mo	Male	NA	NA	NA
1189	13804.s1||11_126163599_G_A	exome	control	control	11_126163599_G_A	11	126163599	G	A	114609	TIRAP	+	3'UTR			UTR3	TIRAP	NM_001318777:c.*17G>A;NM_001039661:c.*17G>A	.	.	.	.	.	.	.	.	.	.	.	.	.	.	.	.	.	Iossifov;Satterstrom2020	13804.s1	;13804		;SSC09100	;SSC09093	;Female	NA	NA	NA
1190	2099638||11_126215398_A_G	exome	NDD	ID	11_126215398_A_G	11	126215398	A	G	28960	DCPS	+	CDS			exonic	DCPS	.	nonsynonymous SNV	DCPS:NM_001350236:exon6:c.A925G:p.I309V,DCPS:NM_014026:exon6:c.A904G:p.I302V	D	D	P	D	D	M	T	N	T	T	T	D	17.97	1.083	0.989	Heyne_2018	2099638		simplex			male	NA	NA	NA
1191	14183.p1||11_1263122_C_T	exome	NDD	autism	11_1263122_C_T	11	1263122	C	T	727897	MUC5B	+	CDS			exonic	MUC5B	.	nonsynonymous SNV	MUC5B:NM_002458:exon31:c.C5012T:p.T1671M	D	D	D	.	N	N	T	N	T	T	D	N	12.02	0.657	0.004	Iossifov;Satterstrom2020	14183.p1	;14183		;14183.fa	;14183.mo	;Male	NA	NA	NA
1192	1424JS0003||11_126333180_C_T	exome	NDD	autism	11_126333180_C_T	11	126333180	C	T	84623	KIRREL3	-	CDS			exonic	KIRREL3	.	nonsynonymous SNV	KIRREL3:NM_001161707:exon6:c.G614A:p.R205Q,KIRREL3:NM_001301097:exon6:c.G614A:p.R205Q,KIRREL3:NM_032531:exon6:c.G614A:p.R205Q	D	D	D	D	D	M	T	N	D	D	D	D	28.6	0.843	0.981	DeRubeis2014;ASC_Neale2012	1424JS0003	;1424JS0003		;1360JS0020	;1360JS0021	;Male	NA	NA	NA
1193	08C78417||11_126343313_C_T	exome	NDD	autism	11_126343313_C_T	11	126343313	C	T	84623	KIRREL3	-	CDS			exonic	KIRREL3	.	nonsynonymous SNV	KIRREL3:NM_001161707:exon5:c.G482A:p.R161H,KIRREL3:NM_001301097:exon5:c.G482A:p.R161H,KIRREL3:NM_032531:exon5:c.G482A:p.R161H	T	D	P	D	D	M	D	N	D	D	D	D	29.5	0.837	0.955	Satterstrom2020	08C78417	08C78417		08C78425	08C78426	Male	NA	NA	NA
1194	12644.p1||11_126343313_C_T	exome	NDD	autism	11_126343313_C_T	11	126343313	C	T	84623	KIRREL3	-	CDS			exonic	KIRREL3	.	nonsynonymous SNV	KIRREL3:NM_001161707:exon5:c.G482A:p.R161H,KIRREL3:NM_001301097:exon5:c.G482A:p.R161H,KIRREL3:NM_032531:exon5:c.G482A:p.R161H	T	D	P	D	D	M	D	N	D	D	D	D	29.5	0.837	0.955	Krumm;Satterstrom2020	12644.p1	;12644		;SSC06062	;SSC06050	;Male	NA	NA	NA
1195	3363-1||11_1263913_C_T	exome	NDD	schizophrenia	11_1263913_C_T	11	1263913	C	T	727897	MUC5B	+	CDS			exonic	MUC5B	.	nonsynonymous SNV	MUC5B:NM_002458:exon31:c.C5803T:p.P1935S	T	B	B	.	N	N	T	N	T	T	T	N	0.115	-0.32	0.001	Fromer2014	3363-1						NA	NA	NA
1196	11653.p1||11_1265831_T_C	exome	NDD	ASD	11_1265831_T_C	11	1265831	T	C	727897	MUC5B	+	CDS			exonic	MUC5B	.	nonsynonymous SNV	MUC5B:NM_002458:exon31:c.T7721C:p.V2574A	T	B	B	.	N	N	T	N	T	T	.	N	0.002	-0.783	0	Heyne_2018	11653.p1		simplex			male	NA	NA	NA
1197	11046.s1||11_1267631_C_T	exome	control	control	11_1267631_C_T	11	1267631	C	T	727897	MUC5B	+	CDS			exonic	MUC5B	.	nonsynonymous SNV	MUC5B:NM_002458:exon31:c.C9521T:p.T3174M	T	D	B	.	N	L	T	N	T	T	.	N	7.367	-0.251	0	Iossifov	11046.s1						NA	NA	NA
1198	13893.s1||11_1268763_G_A	exome	control	control	11_1268763_G_A	11	1268763	G	A	727897	MUC5B	+	CDS			exonic	MUC5B	.	synonymous SNV	MUC5B:NM_002458:exon31:c.G10653A:p.S3551S	.	.	.	.	.	.	.	.	.	.	.	.	.	.	.	Iossifov	13893.s1						NA	NA	NA
1199	11653.p1||11_1269758_C_T	exome	NDD	ASD	11_1269758_C_T	11	1269758	C	T	727897	MUC5B	+	CDS			exonic	MUC5B	.	nonsynonymous SNV	MUC5B:NM_002458:exon31:c.C11648T:p.T3883M	D	D	P	.	N	M	T	N	T	T	T	N	8.071	-0.368	0.001	Heyne_2018	11653.p1		simplex			male	NA	NA	NA
1200	13983.p1||11_1269769_C_A	exome	NDD	autism;ASD	11_1269769_C_A	11	1269769	C	A	727897	MUC5B	+	CDS			exonic	MUC5B	.	nonsynonymous SNV	MUC5B:NM_002458:exon31:c.C11659A:p.P3887T	T	B	B	.	N	L	T	N	T	T	.	N	0.61	0.466	0.001	Iossifov;Heyne_2018	13983.p1		;simplex			;female	NA	NA	NA
1201	25151.p1||11_1270011_A_T	exome	NDD	tourette_syndrome	11_1270011_A_T	11	1270011	A	T	727897	MUC5B	+	CDS	Simple_repeat	1	exonic	MUC5B	.	synonymous SNV	MUC5B:NM_002458:exon31:c.A11901T:p.P3967P	.	.	.	.	.	.	.	.	.	.	.	.	.	.	.	Willsey2017	25151.p1						NA	NA	NA
1202	12447.p1||11_1270260_C_A	exome	NDD	autism	11_1270260_C_A	11	1270260	C	A	727897	MUC5B	+	CDS			exonic	MUC5B	.	nonsynonymous SNV	MUC5B:NM_002458:exon31:c.C12150A:p.H4050Q	T	B	B	.	N	M	T	N	T	T	T	N	0.385	-0.31	0.015	Krumm	12447.p1						NA	NA	NA
1203	11957.p1||11_1270631_G_T	exome	NDD	autism	11_1270631_G_T	11	1270631	G	T	727897	MUC5B	+	CDS			exonic	MUC5B	.	nonsynonymous SNV	MUC5B:NM_002458:exon31:c.G12521T:p.C4174F	D	D	D	.	N	H	T	D	T	T	D	D	11	0.776	0.01	Krumm	11957.p1						NA	NA	NA
1204	12779.p1||11_1273699_C_T	exome	NDD	autism	11_1273699_C_T	11	1273699	C	T	727897	MUC5B	+	CDS			exonic	MUC5B	.	nonsynonymous SNV	MUC5B:NM_002458:exon32:c.C14990T:p.P4997L	T	B	B	.	N	L	T	N	T	T	T	N	7.567	-0.382	0	Satterstrom2020	12779.p1	12779		SSC06641	SSC06622	Male	NA	NA	NA
1205	NDAR_INVCV108AHP_wes1||11_12785933_C_T	exome	NDD	autism	11_12785933_C_T	11	12785933	C	T	7003	TEAD1	+	CDS			exonic	TEAD1	.	nonsynonymous SNV	TEAD1:NM_021961:exon3:c.C154T:p.P52S	D	D	D	D	D	M	T	D	T	T	D	D	28.4	0.935	0.925	DeRubeis2014;De_Rubeis_2014	NDAR_INVCV108AHP_wes1	;NDAR_INVCV108AHP_wes1		;NDAR_INVMN182MMG_wes1	;NDAR_INVTT816LCF_wes1	;Female	NA	NA	NA
1206	G01-GEA-262-HI||11_1282757_C_T	exome	NDD	autism	11_1282757_C_T	11	1282757	C	T	727897	MUC5B	+	CDS			exonic	MUC5B	.	synonymous SNV	MUC5B:NM_002458:exon49:c.C17208T:p.G5736G	.	.	.	.	.	.	.	.	.	.	.	.	.	.	.	Satterstrom2020	G01-GEA-262-HI	G01-GEA-262-HI		G01-GEA-262-PA	G01-GEA-262-MA	Female	NA	NA	NA
1207	08C73088||11_1283318_G_A	exome	NDD	autism	11_1283318_G_A	11	1283318	G	A	727897	MUC5B	+	3'UTR			UTR3	MUC5B	NM_002458:c.*480G>A	.	.	.	.	.	.	.	.	.	.	.	.	.	.	.	.	.	Satterstrom2020	08C73088	08C73088		08C73090	08C73089	Male	NA	NA	NA
1208	dh||11_128333454_T_C	exome	NDD	EE	11_128333454_T_C	11	128333454	T	C	2113	ETS1	-	CDS			exonic	ETS1	.	nonsynonymous SNV	ETS1:NM_001162422:exon3:c.A412G:p.I138V,ETS1:NM_001330451:exon6:c.A799G:p.I267V,ETS1:NM_005238:exon7:c.A1060G:p.I354V,ETS1:NM_001143820:exon9:c.A1192G:p.I398V	D	P	D	D	D	M	T	N	T	T	T	D	26.3	1.061	1	Heyne_2018	dh		simplex			male	NA	NA	NA
1209	C1071-03||11_128354945_T_C	exome	NDD	tourette_syndrome	11_128354945_T_C	11	128354945	T	C	2113	ETS1	-	CDS			exonic	ETS1	.	nonsynonymous SNV	ETS1:NM_001330451:exon5:c.A503G:p.Q168R,ETS1:NM_005238:exon5:c.A503G:p.Q168R,ETS1:NM_001143820:exon7:c.A635G:p.Q212R	D	D	D	D	D	L	T	N	T	T	T	D	13.05	0.964	0.988	Willsey2017	C1071-03						NA	NA	NA
1210	05HI3915A||11_128391852_A_C	exome	NDD	autism	11_128391852_A_C	11	128391852	A	C	2113	ETS1	-	CDS			exonic	ETS1	.	nonsynonymous SNV	ETS1:NM_001162422:exon1:c.T38G:p.I13S,ETS1:NM_001330451:exon1:c.T38G:p.I13S,ETS1:NM_005238:exon1:c.T38G:p.I13S	D	P	B	.	D	L	T	N	T	T	D	D	19.82	1.139	1	Satterstrom2020	05HI3915A	05HI3915A		05HI3917A	05HI3918A	Female	NA	NA	NA
1211	DEASD_0401_001||11_128442976_G_A	exome	NDD	autism	11_128442976_G_A	11	128442976	G	A	2113	ETS1	-	CDS			exonic	ETS1	.	nonsynonymous SNV	ETS1:NM_001143820:exon2:c.C50T:p.A17V	T	B	B	N	N	.	T	N	T	T	T	N	9.792	1.048	0.004	DeRubeis2014	DEASD_0401_001						NA	NA	NA
1212	DDDP114003||11_128628065_C_T	exome	NDD	DD	11_128628065_C_T	11	128628065	C	T	2313	FLI1	+	CDS||5'UTR			exonic	FLI1	.	nonsynonymous SNV	FLI1:NM_002017:exon2:c.C74T:p.A25V	D	D	P	D	D	M	.	N	T	T	T	D	29.6	0.852	0.946	Heyne_2018	DDDP114003		simplex			female	NA	NA	NA
1213	43173||11_128642776_T_A	exome	NDD	EE	11_128642776_T_A	11	128642776	T	A	2313	FLI1	+	CDS			exonic	FLI1	.	nonsynonymous SNV	FLI1:NM_002017:exon4:c.T485A:p.M162K,FLI1:NM_001167681:exon5:c.T386A:p.M129K,FLI1:NM_001271010:exon5:c.T287A:p.M96K	D	B	B	D	D	M	T	D	T	T	D	D	24.7	1.061	1	Heyne_2018	43173		simplex			female	NA	NA	NA
1214	14209.s1||11_128772421_G_A	exome	control	control	11_128772421_G_A	11	128772421	G	A	219833	C11orf45	-	3'UTR			UTR3	C11orf45	NM_001256088:c.*31C>T;NM_145013:c.*31C>T	.	.	.	.	.	.	.	.	.	.	.	.	.	.	.	.	.	Satterstrom2020	14209.s1	14209		SSC11038	SSC11034	Male	NA	NA	NA
1215	AU004017||11_128839782_G_A	exome	NDD	autism	11_128839782_G_A	11	128839782	G	A	9743	ARHGAP32	-	CDS||3'UTR			exonic	ARHGAP32	.	nonsynonymous SNV	ARHGAP32:NM_014715:exon13:c.C4237T:p.R1413W,ARHGAP32:NM_001142685:exon22:c.C5284T:p.R1762W	D	D	D	D	D	M	T	D	T	T	D	D	34	1.048	0.997	DeRubeis2014;De_Rubeis_2014	AU004017	;AU004017		;AU004016	;AU004015	;Male	NA	NA	NA
1216	DDDP118445||11_128839941_G_C	exome	NDD	DD	11_128839941_G_C	11	128839941	G	C	9743	ARHGAP32	-	CDS||3'UTR			exonic	ARHGAP32	.	nonsynonymous SNV	ARHGAP32:NM_014715:exon13:c.C4078G:p.P1360A,ARHGAP32:NM_001142685:exon22:c.C5125G:p.P1709A	T	B	B	N	D	L	T	N	T	T	T	N	0.003	-0.267	0.135	Heyne_2018	DDDP118445		simplex			female	NA	NA	NA
1217	DEASD_1016_001||11_128840384_A_C	exome	NDD	autism	11_128840384_A_C	11	128840384	A	C	9743	ARHGAP32	-	CDS||3'UTR			exonic	ARHGAP32	.	nonsynonymous SNV	ARHGAP32:NM_014715:exon13:c.T3635G:p.L1212W,ARHGAP32:NM_001142685:exon22:c.T4682G:p.L1561W	D	D	P	N	D	L	T	N	T	T	T	D	24.5	1.199	0.697	Satterstrom2020	DEASD_1016_001	DEASD_1016_001		DEASD_1016_500	DEASD_1016_600	Male	NA	NA	NA
1218	221||11_128840740_G_C	exome	NDD	ID	11_128840740_G_C	11	128840740	G	C	9743	ARHGAP32	-	CDS||3'UTR			exonic	ARHGAP32	.	synonymous SNV	ARHGAP32:NM_014715:exon13:c.C3279G:p.S1093S,ARHGAP32:NM_001142685:exon22:c.C4326G:p.S1442S	.	.	.	.	.	.	.	.	.	.	.	.	.	.	.	Heyne_2018	221		simplex			male	NA	NA	NA
1219	Lelieveld_221||11_128840740_G_C	exome	NDD	ID	11_128840740_G_C	11	128840740	G	C	9743	ARHGAP32	-	CDS||3'UTR			exonic	ARHGAP32	.	synonymous SNV	ARHGAP32:NM_014715:exon13:c.C3279G:p.S1093S,ARHGAP32:NM_001142685:exon22:c.C4326G:p.S1442S	.	.	.	.	.	.	.	.	.	.	.	.	.	.	.	Lelieveld2016	Lelieveld_221						NA	NA	NA
1220	DDDP119611||11_128850472_G_T	exome	NDD	DD	11_128850472_G_T	11	128850472	G	T	9743	ARHGAP32	-	CDS||5'UTR			exonic	ARHGAP32	.	nonsynonymous SNV	ARHGAP32:NM_014715:exon8:c.C863A:p.T288N,ARHGAP32:NM_001142685:exon17:c.C1910A:p.T637N	D	D	D	D	D	M	T	D	T	T	T	D	27.3	1.048	1	Heyne_2018	DDDP119611		simplex			male	NA	NA	NA
1221	11C119421||11_128994701_T_C	exome	control	control	11_128994701_T_C	11	128994701	T	C	9743	ARHGAP32	-	CDS			exonic	ARHGAP32	.	nonsynonymous SNV	ARHGAP32:NM_001142685:exon3:c.A314G:p.K105R	D	D	D	.	D	L	T	N	T	T	T	D	26.4	1.061	0.998	Satterstrom2020	11C119421	11C119421		11C119425	11C119424	Male	NA	NA	NA
1222	DDDP102018||11_12901293_G_A	exome	NDD	DD	11_12901293_G_A	11	12901293	G	A	7003	TEAD1	+	CDS			exonic	TEAD1	.	synonymous SNV	TEAD1:NM_021961:exon6:c.G369A:p.A123A	.	.	.	.	.	.	.	.	.	.	.	.	.	.	.	Heyne_2018	DDDP102018		simplex			female	NA	NA	NA
1223	DDDP105142||11_129246087_G_T	exome	NDD	DD	11_129246087_G_T	11	129246087	G	T	8538	BARX2	+	CDS			exonic	BARX2	.	nonsynonymous SNV	BARX2:NM_003658:exon1:c.G157T:p.V53L	T	B	B	D	D	N	D	N	T	T	D	D	22.7	0.889	0.997	Heyne_2018	DDDP105142		simplex			female	NA	NA	NA
1224	CC1119.202||11_129306987_T_C	exome	NDD	autism	11_129306987_T_C	11	129306987	T	C	8538	BARX2	+	intron			intronic	BARX2	.	.	.	.	.	.	.	.	.	.	.	.	.	.	.	.	.	.	Satterstrom2020	CC1119.202	CC1119		CC1119.101	CC1119.102	Male	NA	NA	NA
1225	13914.p1||11_129739572_C_T	exome	NDD	autism	11_129739572_C_T	11	129739572	C	T	4798	NFRKB	-	CDS			exonic	NFRKB	.	synonymous SNV	NFRKB:NM_006165:exon22:c.G3423A:p.S1141S,NFRKB:NM_001143835:exon24:c.G3348A:p.S1116S	.	.	.	.	.	.	.	.	.	.	.	.	.	.	.	Iossifov;SSC_Iossifov_2014	13914.p1	;13914		;13914.fa	;13914.mo	;Female	NA	NA	NA
1226	hy||11_129751351_C_T	exome	NDD	EE	11_129751351_C_T	11	129751351	C	T	4798	NFRKB	-	CDS			exonic	NFRKB	.	synonymous SNV	NFRKB:NM_006165:exon11:c.G1446A:p.Q482Q,NFRKB:NM_001143835:exon13:c.G1371A:p.Q457Q	.	.	.	.	.	.	.	.	.	.	.	.	.	.	.	Heyne_2018	hy		simplex			female	NA	NA	NA
1227	12029.p1||11_129772426_A_G	exome	NDD	autism	11_129772426_A_G	11	129772426	A	G	56980	PRDM10	-	intron			intronic	PRDM10	.	.	.	.	.	.	.	.	.	.	.	.	.	.	.	.	.	.	Satterstrom2020	12029.p1	12029		SSC03642	SSC03638	Male	NA	NA	NA
1228	DDDP111545||11_129795019_G_A	exome	NDD	DD	11_129795019_G_A	11	129795019	G	A	56980	PRDM10	-	CDS			exonic	PRDM10	.	nonsynonymous SNV	PRDM10:NM_199439:exon8:c.C1378T:p.R460C,PRDM10:NM_199438:exon9:c.C1390T:p.R464C,PRDM10:NM_199437:exon12:c.C1636T:p.R546C,PRDM10:NM_020228:exon13:c.C1648T:p.R550C	D	D	D	D	D	M	T	D	T	T	D	D	34	1.048	0.998	Heyne_2018	DDDP111545		simplex			female	NA	NA	NA
1229	NDAR_INVRT684RNC_wes1||11_129812553_C_A	exome	NDD	autism	11_129812553_C_A	11	129812553	C	A	56980	PRDM10	-	intron			intronic	PRDM10	.	.	.	.	.	.	.	.	.	.	.	.	.	.	.	.	.	.	De_Rubeis_2014	NDAR_INVRT684RNC_wes1	NDAR_INVRT684RNC_wes1		NDAR_INVXJ803CTY_wes1	NDAR_INVME001DG4_wes1	Male	NA	NA	NA
1230	ASC_CA_190_A||11_129817321_G_A	exome	NDD	autism	11_129817321_G_A	11	129817321	G	A	56980	PRDM10	-	5'UTR			UTR5	PRDM10	NM_199439:c.-20C>T;NM_199438:c.-20C>T	.	.	.	.	.	.	.	.	.	.	.	.	.	.	.	.	.	Satterstrom2020	ASC_CA_190_A	ASC_CA_190_A		ASC_CA_190_P	ASC_CA_190_M	Female	NA	NA	NA
1231	11077.p1||11_130011497_T_C	exome	NDD	autism	11_130011497_T_C	11	130011497	T	C	334	APLP2	+	intron			intronic	APLP2	.	.	.	.	.	.	.	.	.	.	.	.	.	.	.	.	.	.	Satterstrom2020	11077.p1	11077		SSC02565	SSC02588	Male	NA	NA	NA
1232	12547.p1||11_130048290_A_T	exome	NDD	autism	11_130048290_A_T	11	130048290	A	T	6768	ST14	+	intron	LTR	1	intronic	ST14	.	.	.	.	.	.	.	.	.	.	.	.	.	.	.	.	.	.	Iossifov	12547.p1						NA	NA	NA
1233	13777.p1||11_130058079_G_A	exome	NDD	autism	11_130058079_G_A	11	130058079	G	A	6768	ST14	+	CDS			exonic	ST14	.	nonsynonymous SNV	ST14:NM_021978:exon2:c.G152A:p.G51D	D	D	D	N	D	M	D	N	D	D	D	D	23.5	1.048	0.526	Iossifov;Satterstrom2020	13777.p1	;13777		;13777.fa	;13777.mo	;Male	NA	NA	NA
1234	09C84008||11_130069939_C_G	exome	NDD	autism	11_130069939_C_G	11	130069939	C	G	6768	ST14	+	CDS			exonic	ST14	.	nonsynonymous SNV	ST14:NM_021978:exon16:c.C1901G:p.A634G	D	B	B	N	N	N	D	N	T	T	D	N	11.41	-0.45	0.005	DeRubeis2014;Satterstrom2020	09C84008	;09C84008		;09C84010	;09C84009	;Female	NA	NA	NA
[truncated: 22,027 more rows]

## Sheet: studies
Sample distribution in studie							Phenotype distribution
Study	NDD	Ctrl	Total	PMID	denovodb		PrimaryPhenotype	Sample Number
[truncated: 27 more rows]
