# Supplementary material for: Reference-informed prediction of alternative splicing and splicing-altering mutations from sequences
Source: HighWire-hosted journal article supplement (doi:10.1101/gr.279044.124), 2024-07-01
Supplement: Supplemental_Table_S7.xlsx [file Supplemental_Table_S7.xlsx]

## Sheet: Table S7
Table S7: Splicing-altering de novo mutations (dPSI<-0.05) predicted in the WGS dataset. Each variant was assigned to a proximal exon, and the variant to exon mapping was provided in the var2exonID column, and the exon coordinates were specified in columns 'exonStart' and 'exonEnd'.
eventID	varID	var2exonID	Pheno	chrom	varPOS	Ref	Alt	exonStart	exonEnd	strand	var2exon.type	var2exon.dist	ref PSI	dPSI	Func.refGene	Gene.refGene	GeneDetail.refGene	ExonicFunc.refGene	AAChange.refGene	SIFT_pred	Polyphen2_HDIV_pred	Polyphen2_HVAR_pred	LRT_pred	MutationTaster_pred	MutationAssessor_pred	FATHMM_pred	PROVEAN_pred	MetaSVM_pred	MetaLR_pred	M-CAP_pred	fathmm-MKL_coding_pred	CADD_phred	phyloP20way_mammalian	phastCons20way_mammalian	SampleID	StudyName	SequenceType	PrimaryPhenotype	FAMILYID	FAMILYTYPE	FATHERID	MOTHERID	gender	NVIQ	FatherAgeBirth	MotherAgeBirth
1-0441-003||1_22030752_T_A	1_22030752_T_A	1-0441-003||1_22030752_T_A||hg19.ET-84196-3-80469-81803-81934-82577[.][28][DNT]	NDD	chr1	22030752	T	A	22030755	22030885	-	downstream	3	0.961786	-0.885385	intronic	USP48	.	.	.	.	.	.	.	.	.	.	.	.	.	.	.	.	.	.	1-0441-003	Yuen2016	genome	autism	FAM_1-0441-004	SPX	1-0441-002	1-0441-001	M
13317.p1||7_87607732_G_A	7_87607732_G_A	13317.p1||7_87607732_G_A||hg19.ET-53616-3-3936-47085-47162-144375[.][28][UPT][DNT]	NDD	chr7	87607732	G	A	87607651	87607727	+	downstream	5	0.973642	-0.656946	intronic	ADAM22	.	.	.	.	.	.	.	.	.	.	.	.	.	.	.	.	.	.	13317.p1	SSC	genome	autism	13317	simplex	13317.f1	13317.m1	male	104	378	258
12972.p1||3_73112821_T_G	3_73112821_T_G	12972.p1||3_73112821_T_G||hg19.ET-151987-3-67093-69705-69780-70035[.][19][DNT]	NDD	chr3	73112821	T	G	73112824	73112898	+	upstream	-3	0.969587	-0.649883	intronic	PPP4R2	.	.	.	.	.	.	.	.	.	.	.	.	.	.	.	.	.	.	12972.p1	SSC	genome	autism	12972	simplex	12972.f1	12972.m1	male	79	370	369
14346.p1||18_57014741_T_C	18_57014741_T_C	14346.p1||18_57014741_T_C||hg19.ET-3998-3-13164-14705-14764-16225[.][39]	NDD	chr18	57014741	T	C	57014745	57014803	-	downstream	4	0.97653	-0.559549	intronic	LMAN1	.	.	.	.	.	.	.	.	.	.	.	.	.	.	.	.	.	.	14346.p1	SSC	genome	autism	14346	simplex	14346.f1	14346.m1	female	61	362	247
13307.p1||17_76067246_G_A	17_76067246_G_A	13307.p1||17_76067246_G_A||hg19.ET-57690-3-66687-69848-69929-71800[.][15][DNT]	NDD	chr17	76067246	G	A	76067166	76067246	+	exonic.5ss	0	0.967314	-0.508383	exonic	TNRC6C	.	synonymous SNV	TNRC6C:NM_001142640:exon7:c.G2850A:p.P950P,TNRC6C:NM_018996:exon7:c.G2859A:p.P953P	.	.	.	.	.	.	.	.	.	.	.	.	.	.	.	13307.p1	SSC	genome	autism	13307	simplex	13307.f1	13307.m1	male	38	432	406
2-1397-003||3_49083858_C_T	3_49083858_C_T	2-1397-003||3_49083858_C_T||hg19.ET-54870-3-50003-50492-50647-52567[.][35][DNT]	NDD	chr3	49083858	C	T	49083858	49084012	-	exonic.5ss	0	0.977279	-0.44836	exonic	QRICH1	.	synonymous SNV	QRICH1:NM_001320582:exon5:c.G1671A:p.K557K,QRICH1:NM_001320583:exon5:c.G1671A:p.K557K,QRICH1:NM_001320584:exon5:c.G1671A:p.K557K,QRICH1:NM_001320585:exon5:c.G1671A:p.K557K,QRICH1:NM_198880:exon5:c.G1671A:p.K557K,QRICH1:NM_001320580:exon6:c.G1671A:p.K557K,QRICH1:NM_001320581:exon6:c.G1671A:p.K557K,QRICH1:NM_017730:exon6:c.G1671A:p.K557K	.	.	.	.	.	.	.	.	.	.	.	.	.	.	.	2-1397-003	Yuen2017	genome	autism	FAM_2-1397-003	SPX	2-1397-002	2-1397-001	M
AU1687302|AU1687303||5_1814580_G_A	5_1814580_G_A	AU1687302|AU1687303||5_1814580_G_A||hg19.ET-4726-3-3993-15957-16080-17469[.][160][DNT]	NDD	chr5	1814580	G	A	1814453	1814575	+	downstream	5	0.977074	-0.409982	intronic	NDUFS6	.	.	.	D	.	.	.	D	.	.	N	T	T	T	N	7.936	-0.005	0.021	AU1687302|AU1687303	Yuen2017	genome	autism	FAM_AU1687303	SPX	AU1687203	AU1687202	M
12358.p1||18_52928697_C_T	18_52928697_C_T	12358.p1||18_52928697_C_T||hg19.ET-6925-3-369127-377424-377492-378930[.][90][DNT]	NDD	chr18	52928697	C	T	52928697	52928764	-	exonic.5ss	0	0.983871	-0.403232	exonic	TCF4	.	synonymous SNV	TCF4:NM_001243234:exon5:c.G510A:p.S170S,TCF4:NM_001243235:exon5:c.G510A:p.S170S,TCF4:NM_001243236:exon5:c.G510A:p.S170S,TCF4:NM_001348214:exon5:c.G510A:p.S170S,TCF4:NM_001348215:exon5:c.G342A:p.S114S,TCF4:NM_001348216:exon5:c.G510A:p.S170S,TCF4:NM_001330605:exon7:c.G600A:p.S200S,TCF4:NM_001243232:exon8:c.G777A:p.S259S,TCF4:NM_001243233:exon8:c.G600A:p.S200S,TCF4:NM_001306208:exon8:c.G777A:p.S259S…	.	.	.	.	.	.	.	.	.	.	.	.	.	.	.	12358.p1	Turner_2017;SSC	genome	autism	;12358	;simplex	;12358.f1	;12358.m1	;female	;36	NA;342	NA;341
2-1381-003||14_94160761_A_T	14_94160761_A_T	2-1381-003||14_94160761_A_T||hg19.ET-57578-3-361728-364116-364194-374406[.][5][UPT]	NDD	chr14	94160761	A	T	94160681	94160758	+	downstream	3	0.984616	-0.397045	intronic	UNC79	.	.	.	.	.	.	.	.	.	.	.	.	.	.	.	.	.	.	2-1381-003	Yuen2017	genome	autism	FAM_2-1381-003	SPX	2-1381-002	2-1381-001	M
14450.p1||17_60111145_T_C	17_60111145_T_C	14450.p1||17_60111145_T_C||hg19.ET-9969-3-32820-34298-34496-36644[.][7][UPT]	NDD	chr17	60111145	T	C	60111148	60111345	-	downstream	3	0.968746	-0.391662	intronic	MED13	.	.	.	.	.	.	.	.	.	.	.	.	.	.	.	.	.	.	14450.p1	SSC	genome	autism	14450	simplex	14450.f1	14450.m1	male	87	443	363
14668.p1||4_83378196_G_T	4_83378196_G_T	14668.p1||4_83378196_G_T||hg19.ET-58478-3-27282-29342-29466-32408[.][52][UPT][DNT]	NDD	chr4	83378196	G	T	83378068	83378191	+	downstream	5	0.97746	-0.390869	intronic	ENOPH1	.	.	.	.	.	.	.	.	.	.	.	.	.	.	.	.	.	.	14668.p1	SSC	genome	autism	14668	simplex	14668.f1	14668.m1	male	123	438	487
5-0146-003||9_4605342_C_G	9_4605342_C_G	5-0146-003||9_4605342_C_G||hg19.ET-55064-3-51752-64234-64328-65405[.][10]	NDD	chr9	4605342	C	G	4605347	4605440	-	downstream	5	0.982261	-0.384716	intronic	SPATA6L	.	.	.	.	.	.	.	.	.	.	.	.	.	.	.	.	.	.	5-0146-003	Yuen2017	genome	autism	FAM_5-0146-003	SPX	5-0146-002	5-0146-001	M
AU3399302||15_89867041_C_T	15_89867041_C_T	AU3399302||15_89867041_C_T||hg19.ET-5428-3-13689-13894-13981-14284[.][26][UPT][DNT]	NDD	chr15	89867041	C	T	89867046	89867132	-	downstream	5	0.983769	-0.360604	intronic	POLG	.	.	.	.	.	.	.	.	.	.	.	.	.	.	.	.	.	.	AU3399302	Yuen2017	genome	autism	FAM_AU3399303	MPX	AU3399201	AU3399202	M
14601.p1||21_44272360_C_T	21_44272360_C_T	14601.p1||21_44272360_C_T||hg19.ET-10785-3-29021-30265-30335-32347[.][33][DNT]	NDD	chr21	44272360	C	T	44272365	44272434	-	downstream	5	0.97568	-0.355734	intronic	WDR4	.	.	.	.	.	.	.	.	.	.	.	.	.	.	.	.	.	.	14601.p1	SSC	genome	autism	14601	simplex	14601.f1	14601.m1	female	42	354	381
2-1166-003||17_1943117_G_T	17_1943117_G_T	2-1166-003||17_1943117_G_T||hg19.ET-1801-3-12820-15618-15687-16081[.][54][UPT]	NDD	chr17	1943117	G	T	1943049	1943117	+	exonic.5ss	0	0.933683	-0.353672	exonic	DPH1	.	nonsynonymous SNV	DPH1:NM_001346576:exon6:c.G344T:p.R115L,DPH1:NM_001346574:exon7:c.G764T:p.R255L,DPH1:NM_001346575:exon7:c.G731T:p.R244L,DPH1:NM_001383:exon7:c.G764T:p.R255L	D	B	B	D	D	M	T	D	T	T	.	D	33	1.048	0.977	2-1166-003	Yuen2016	genome	autism	FAM_2-1166-003	SPX	2-1166-002	2-1166-001	M
2-1094-005||10_70856834_G_A	10_70856834_G_A	2-1094-005||10_70856834_G_A||hg19.ET-5552-3-3165-12012-12160-18799[.][447][UPT]	NDD	chr10	70856834	G	A	70856840	70856987	+	upstream	-6	0.968553	-0.320762	intronic	SRGN	.	.	.	.	.	.	.	.	.	.	.	.	.	.	.	.	.	.	2-1094-005	Yuen2017	genome	autism	FAM_2-1094-005	MPX	2-1094-002	2-1094-001	F
11312.p1||6_86223519_T_A	6_86223519_T_A	11312.p1||6_86223519_T_A||hg19.ET-57231-3-82842-83016-83112-88852[.][79][UPT]	NDD	chr6	86223519	T	A	86223518	86223613	-	exonic.5ss	-1	0.9612	-0.310245	exonic	SNX14	.	synonymous SNV	SNX14:NM_020468:exon23:c.A2493T:p.P831P,SNX14:NM_001350536:exon24:c.A2520T:p.P840P,SNX14:NM_001350537:exon24:c.A2517T:p.P839P,SNX14:NM_001350541:exon24:c.A2460T:p.P820P,SNX14:NM_001350542:exon24:c.A2364T:p.P788P,SNX14:NM_001350543:exon24:c.A2361T:p.P787P,SNX14:NM_001350548:exon24:c.A1497T:p.P499P,SNX14:NM_001297614:exon25:c.A2625T:p.P875P,SNX14:NM_001350534:exon25:c.A2622T:p.P874P,SNX14:NM_001350…	.	.	.	.	.	.	.	.	.	.	.	.	.	.	.	11312.p1	SSC	genome	autism	11312	simplex	11312.f1	11312.m1	male	109	390	424
1-0104-003||X_48934085_T_A	X_48934085_T_A	1-0104-003||X_48934085_T_A||hg19.ET-11152-3-26756-26876-26971-27455[.][96][DNT]	NDD	chrX	48934085	T	A	48934089	48934183	-	downstream	4	0.949246	-0.308255	intronic	WDR45	.	.	.	.	.	.	.	.	.	.	.	.	.	.	.	.	.	.	1-0104-003	Yuen2017	genome	autism	FAM_1-0104-004	MPX	1-0104-002	1-0104-001	F
14008.p1||11_67075206_C_T	11_67075206_C_T	14008.p1||11_67075206_C_T||hg19.ET-54961-3-6989-7101-7290-7398[.][13][UPT]	NDD	chr11	67075206	C	T	67075020	67075208	+	exonic.5ss	-2	0.838283	-0.294611	exonic	SSH3	.	synonymous SNV	SSH3:NM_017857:exon7:c.C789T:p.G263G	.	.	.	.	.	.	.	.	.	.	.	.	.	.	.	14008.p1	SSC	genome	autism	14008	simplex	14008.f1	14008.m1	male	93	372	350
14009.p1||10_27431317_T_C	10_27431317_T_C	14009.p1||10_27431317_T_C||hg19.ET-10730-3-11993-14935-15034-21035[.][138][UPT][DNT]	NDD	chr10	27431317	T	C	27431316	27431414	-	exonic.5ss	-1	0.852747	-0.281912	exonic	YME1L1	.	synonymous SNV	YME1L1:NM_014263:exon4:c.A429G:p.P143P,YME1L1:NM_139312:exon5:c.A600G:p.P200P	.	.	.	.	.	.	.	.	.	.	.	.	.	.	.	14009.p1	Turner_2017;SSC	genome	autism	;14009	;simplex	;14009.f1	;14009.m1	;female	;91	NA;366	NA;369
11948.p1||11_67208799_C_T	11_67208799_C_T	11948.p1||11_67208799_C_T||hg19.ET-57175-3-5089-5307-5489-5577[.][144][UPT][DNT]	NDD	chr11	67208799	C	T	67208804	67208985	-	downstream	5	0.965144	-0.277623	intronic	CORO1B	.	.	.	.	.	.	.	.	.	.	.	.	.	.	.	.	.	.	11948.p1	Turner_2017;SSC	genome	autism	;11948	;simplex	;11948.f1	;11948.m1	;female	;62	NA;455	NA;438
22364.p1||8_95556189_C_T	8_95556189_C_T	22364.p1||8_95556189_C_T||hg19.ET-25962-3-3134-12576-12692-18172[.][26][UPT][DNT]	NDD	chr8	95556189	C	T	95556055	95556170	-	upstream	-19	0.969078	-0.273997	intronic	VIRMA	.	.	.	.	.	.	.	.	.	.	.	.	.	.	.	.	.	.	22364.p1	SSC	genome	autism	KOR-364	simplex	KOR-364.f1	KOR-364.m1	female		375	380
1-0007-003||22_51121844_A_G	22_51121844_A_G	1-0007-003||22_51121844_A_G||hg19.ET-85358-3-7787-11698-11776-12943[.][9]	NDD	chr22	51121844	A	G	51121768	51121845	+	exonic.5ss	-1	0.97807	-0.266392	exonic	SHANK3	.	nonsynonymous SNV	SHANK3:NM_033517:exon8:c.A962G:p.Q321R	.	.	.	.	.	.	.	.	.	.	.	.	.	.	.	1-0007-003	Yuen2017	genome	autism	FAM_1-0007-003	SPX	1-0007-002	1-0007-001	F
1-0024-003||18_21044472_A_G	18_21044472_A_G	1-0024-003||18_21044472_A_G||hg19.ET-8780-3-14491-14696-14806-16310[.][36]	NDD	chr18	21044472	A	G	21044483	21044592	+	upstream	-11	0.976372	-0.264478	intronic	RIOK3	.	.	.	.	.	.	.	.	.	.	.	.	.	.	.	.	.	.	1-0024-003	Yuen2016	genome	autism	FAM_1-0024-003	SPX	1-0024-002	1-0024-001	M
2-1228-003||15_73862669_G_A	15_73862669_G_A	2-1228-003||15_73862669_G_A||hg19.ET-27020-3-62751-65989-66263-73155[.][43][UPT]	NDD	chr15	73862669	G	A	73862491	73862764	-	exonic.3ss	95	0.98197	-0.218893	exonic	NPTN	.	synonymous SNV	NPTN:NM_001161364:exon5:c.C588T:p.G196G,NPTN:NM_017455:exon5:c.C588T:p.G196G,NPTN:NM_001161363:exon6:c.C936T:p.G312G,NPTN:NM_012428:exon6:c.C936T:p.G312G	.	.	.	.	.	.	.	.	.	.	.	.	.	.	.	2-1228-003	Yuen2016	genome	autism	FAM_2-1228-003	SPX	2-1228-002	2-1228-001	F
13890.p1||17_4905942_G_A	17_4905942_G_A	13890.p1||17_4905942_G_A||hg19.ET-10749-3-7177-7516-7695-7783[.][19]	NDD	chr17	4905942	G	A	4905759	4905937	+	downstream	5	0.981151	-0.18162	intronic	KIF1C	.	.	.	.	.	.	.	.	.	.	.	.	.	.	.	.	.	.	13890.p1	SSC	genome	autism	13890	simplex	13890.f1	13890.m1	female	42	461	428
AU4069301||13_32753806_T_C	13_32753806_T_C	AU4069301||13_32753806_T_C||hg19.ET-10129-3-150734-151375-151500-154677[.][3]	NDD	chr13	32753806	T	C	32753812	32753936	+	upstream	-6	0.972483	-0.171494	intronic	FRY	.	.	.	.	.	.	.	.	.	.	.	.	.	.	.	.	.	.	AU4069301	Yuen2017	genome	autism	FAM_AU4069302	MPX	AU4069201	AU4069202	M
14668.p1||6_99887716_G_A	6_99887716_G_A	14668.p1||6_99887716_G_A||hg19.ET-85015-3-74812-78521-78608-80977[.][9]	NDD	chr6	99887716	G	A	99887645	99887731	-	exonic.3ss	15	0.984086	-0.171178	exonic	USP45	.	nonsynonymous SNV	USP45:NM_001346024:exon14:c.C1915T:p.R639C,USP45:NM_001346025:exon14:c.C1912T:p.R638C,USP45:NM_001346028:exon15:c.C1009T:p.R337C,USP45:NM_001080481:exon16:c.C2089T:p.R697C,USP45:NM_001346021:exon16:c.C2089T:p.R697C,USP45:NM_001346022:exon16:c.C2089T:p.R697C,USP45:NM_001346023:exon16:c.C2086T:p.R696C,USP45:NM_001346026:exon16:c.C2089T:p.R697C,USP45:NM_001346027:exon16:c.C1009T:p.R337C,USP45:NM_001…	T	D	D	N	D	M	T	D	T	T	D	D	28.3	0.953	1	14668.p1	SSC	genome	autism	14668	simplex	14668.f1	14668.m1	male	123	438	487
1-0677-003||18_34844729_C_T	18_34844729_C_T	1-0677-003||18_34844729_C_T||hg19.ET-56853-3-302505-304280-304364-309773[.][11][DNT]	NDD	chr18	34844729	C	T	34844637	34844720	-	upstream	-9	0.871164	-0.1705	intronic	CELF4	.	.	.	.	.	.	.	.	.	.	.	.	.	.	.	.	.	.	1-0677-003	Yuen2017	genome	autism	FAM_1-0677-003	SPX	1-0677-002	1-0677-001	F
AU4473301||4_48597714_G_T	4_48597714_G_T	AU4473301||4_48597714_G_T||hg19.ET-285527-3-187403-187601-187710-189283[.][2][UPT]	NDD	chr4	48597714	G	T	48597607	48597715	-	exonic.3ss	1	0.980324	-0.162971	exonic	FRYL	.	nonsynonymous SNV	FRYL:NM_015030:exon15:c.C1141A:p.R381S	D	D	D	U	D	M	T	D	D	D	D	D	34	1.04	0.965	AU4473301	Yuen2017	genome	autism	FAM_AU4473301	SPX	AU4473201	AU4473202	F
11037.p1||5_96078355_A_G	5_96078355_A_G	11037.p1||5_96078355_A_G||hg19.ET-831-3-82544-83618-83720-87305[.][66][UPT]	NDD	chr5	96078355	A	G	96078359	96078460	+	upstream	-4	0.980229	-0.155911	intronic	CAST	.	.	.	.	.	.	.	.	.	.	.	.	.	.	.	.	.	.	11037.p1	SSC	genome	autism	11037	simplex	11037.f1	11037.m1	male	86	333	332
1-0272-003||17_57430694_G_A	17_57430694_G_A	1-0272-003||17_57430694_G_A||hg19.ET-388403-3-3133-24523-24835-59635[.][11][UPT]	NDD	chr17	57430694	G	A	57430576	57430887	+	exonic.3ss	118	0.912452	-0.15526	UTR5	YPEL2	NM_001005404:c.-77G>A	.	.	.	.	.	.	.	.	.	.	.	.	.	.	.	.	.	1-0272-003	Yuen2017	genome	autism	FAM_1-0272-004	MPX	1-0272-002	1-0272-001	M
12867.p1||5_64892348_C_T	5_64892348_C_T	12867.p1||5_64892348_C_T||hg19.ET-373-3-30310-30829-30940-32715[.][12]	NDD	chr5	64892348	C	T	64892248	64892358	-	exonic.3ss	10	0.976624	-0.146404	exonic	TRIM23	.	synonymous SNV	TRIM23:NM_001656:exon9:c.G1320A:p.V440V,TRIM23:NM_033227:exon9:c.G1320A:p.V440V,TRIM23:NM_033228:exon9:c.G1320A:p.V440V	.	.	.	.	.	.	.	.	.	.	.	.	.	.	.	12867.p1	SSC	genome	autism	12867	simplex	12867.f1	12867.m1	female	63	491	407
12906.p1||12_20890190_G_T	12_20890190_G_T	12906.p1||12_20890190_G_T||hg19.ET-53919-3-40750-44752-44918-47829[.][15]	NDD	chr12	20890190	G	T	20890041	20890206	+	exonic.5ss	-16	0.953006	-0.144865	exonic	SLCO1C1	.	nonsynonymous SNV	SLCO1C1:NM_001145944:exon9:c.G1178T:p.R393M,SLCO1C1:NM_001145945:exon11:c.G1385T:p.R462M,SLCO1C1:NM_017435:exon11:c.G1532T:p.R511M,SLCO1C1:NM_001145946:exon12:c.G1532T:p.R511M	D	B	B	N	N	N	T	N	T	T	T	D	23.8	1.048	0.98	12906.p1	SSC	genome	autism	12906	simplex	12906.f1	12906.m1	male	72	515	426
AU3787302||8_21938346_C_T	8_21938346_C_T	AU3787302||8_21938346_C_T||hg19.uc022asr.1_ET11	NDD	chr8	21938346	C	T	21938316	21938381	+	exonic.3ss	30	0.467268	-0.143567	exonic	DMTN	.	nonsynonymous SNV	DMTN:NM_001302817:exon12:c.C868T:p.R290W,DMTN:NM_001323388:exon12:c.C868T:p.R290W,DMTN:NM_001323381:exon13:c.C988T:p.R330W,DMTN:NM_001323389:exon13:c.C943T:p.R315W,DMTN:NM_001323390:exon13:c.C943T:p.R315W,DMTN:NM_001323391:exon13:c.C913T:p.R305W,DMTN:NM_001323392:exon13:c.C913T:p.R305W,DMTN:NM_001323393:exon13:c.C913T:p.R305W,DMTN:NM_001323394:exon13:c.C913T:p.R305W,DMTN:NM_001323395:exon13:c.C91…	T	D	P	N	D	M	T	N	T	T	D	D	34	0.807	1	AU3787302	Yuen2017	genome	autism	FAM_AU3787303	MPX	AU3787201	AU3787202	M
11054.p1||6_33400029_G_A	6_33400029_G_A	11054.p1||6_33400029_G_A||hg19.ET-8831-3-8834-15091-15183-15615[.][5][UPT]	NDD	chr6	33400029	G	A	33399938	33400029	+	exonic.5ss	0	0.981706	-0.137874	exonic	SYNGAP1	.	synonymous SNV	SYNGAP1:NM_001130066:exon4:c.G387A:p.S129S,SYNGAP1:NM_006772:exon4:c.G387A:p.S129S	.	.	.	.	.	.	.	.	.	.	.	.	.	.	.	11054.p1	SSC	genome	autism	11054	simplex	11054.f1	11054.m1	male	83	277	228
11432.p1||7_30486597_G_A	7_30486597_G_A	11432.p1||7_30486597_G_A||hg19.ET-10392-3-33480-34727-34811-35553[.][6]	NDD	chr7	30486597	G	A	30486583	30486666	-	exonic.5ss	-14	0.753305	-0.137715	exonic	NOD1	.	synonymous SNV	NOD1:NM_006092:exon8:c.C2355T:p.G785G	.	.	.	.	.	.	.	.	.	.	.	.	.	.	.	11432.p1	SSC	genome	autism	11432	simplex	11432.f1	11432.m1	male	117	397	346
AU3790302||2_222322601_G_A	2_222322601_G_A	AU3790302||2_222322601_G_A||hg19.ET-2043-3-92939-117300-117425-118518[.][16]	NDD	chr2	222322601	G	A	222322586	222322710	-	exonic.5ss	-15	0.984192	-0.135465	exonic	EPHA4	.	synonymous SNV	EPHA4:NM_001304537:exon5:c.C1275T:p.V425V,EPHA4:NM_004438:exon6:c.C1428T:p.V476V,EPHA4:NM_001304536:exon7:c.C1428T:p.V476V	.	.	.	.	.	.	.	.	.	.	.	.	.	.	.	AU3790302	Yuen2017	genome	autism	FAM_AU3790302	MPX	AU3790201	AU3790202	M
5-0054-003||3_178942502_G_A	3_178942502_G_A	5-0054-003||3_178942502_G_A||hg19.ET-5290-3-78665-79177-79299-80439[.][12]	NDD	chr3	178942502	G	A	178942488	178942609	+	exonic.3ss	14	0.974976	-0.134346	exonic	PIK3CA	.	nonsynonymous SNV	PIK3CA:NM_006218:exon16:c.G2309A:p.R770Q	D	D	B	D	D	M	T	N	D	T	D	D	28.8	1.048	1	5-0054-003	Yuen2017	genome	autism	FAM_5-0054-003	SPX	5-0054-002	5-0054-001	M
14315.p1||7_77694966_G_A	7_77694966_G_A	14315.p1||7_77694966_G_A||hg19.ET-9863-3-1377627-1390911-1391000-1436597[.][3][DNT]	NDD	chr7	77694966	G	A	77694891	77694979	-	exonic.3ss	13	0.761316	-0.13044	intronic	MAGI2	.	.	.	.	.	.	.	.	.	.	.	.	.	.	.	.	.	.	14315.p1	Turner_2017;SSC	genome	autism	;14315	;simplex	;14315.f1	;14315.m1	;male	;97	NA;367	NA;417
1-0113-003||1_204955245_A_T	1_204955245_A_T	1-0113-003||1_204955245_A_T||hg19.ET-23114-3-158489-160256-160461-161764[.][6]	NDD	chr1	204955245	A	T	204955038	204955242	+	downstream	3	0.200049	-0.128069	intronic	NFASC	.	.	.	.	.	.	.	.	.	.	.	.	.	.	.	.	.	.	1-0113-003	Yuen2016	genome	autism
14484.p1||2_183866852_T_C	2_183866852_T_C	14484.p1||2_183866852_T_C||hg19.ET-10787-3-38528-39232-39375-39458[.][52][UPT]	NDD	chr2	183866852	T	C	183866855	183866997	-	downstream	3	0.978791	-0.124081	intronic	NCKAP1	.	.	.	.	.	.	.	.	.	.	.	.	.	.	.	.	.	.	14484.p1	SSC	genome	autism	14484	simplex	14484.f1	14484.m1	male	72	367	310
AU3637301||7_77552094_A_G	7_77552094_A_G	AU3637301||7_77552094_A_G||hg19.ET-57157-3-124674-126831-126987-133317[.][22][UPT]	NDD	chr7	77552094	A	G	77551940	77552095	+	exonic.5ss	-1	0.953226	-0.118863	exonic	PHTF2	.	nonsynonymous SNV	PHTF2:NM_020432:exon8:c.A1004G:p.E335G,PHTF2:NM_001127357:exon9:c.A1016G:p.E339G,PHTF2:NM_001127358:exon9:c.A1004G:p.E335G,PHTF2:NM_001127359:exon9:c.A1016G:p.E339G,PHTF2:NM_001127360:exon9:c.A1004G:p.E335G	T	D	D	D	D	M	.	N	T	T	T	D	31	1.199	1	AU3637301	Yuen2017	genome	autism	FAM_AU3637301	SPX	AU3637201	AU3637202	M
14411.p1||9_139394999_C_G	9_139394999_C_G	14411.p1||9_139394999_C_G||hg19.ET-4851-3-47039-47939-48235-49527[.][5]	NDD	chr9	139394999	C	G	139395004	139395299	-	downstream	5	0.965943	-0.118344	intronic	NOTCH1	.	.	.	.	.	.	.	.	.	.	.	.	.	.	.	.	.	.	14411.p1	SSC	genome	autism	14411	simplex	14411.f1	14411.m1	male	56	368	323
AU3885305||8_72129201_T_C	8_72129201_T_C	AU3885305||8_72129201_T_C||hg19.ET-2138-3-120630-148209-148268-148380[.][12]	NDD	chr8	72129201	T	C	72129200	72129258	-	exonic.5ss	-1	0.91515	-0.11701	exonic	EYA1	.	nonsynonymous SNV	EYA1:NM_172059:exon11:c.A1093G:p.S365G,EYA1:NM_172060:exon11:c.A1099G:p.S367G,EYA1:NM_172058:exon12:c.A1198G:p.S400G,EYA1:NM_000503:exon13:c.A1198G:p.S400G,EYA1:NM_001288574:exon13:c.A1180G:p.S394G,EYA1:NM_001288575:exon13:c.A832G:p.S278G	D	D	P	D	D	M	D	D	D	D	D	D	24.3	1.061	0.791	AU3885305	Yuen2017	genome	autism	FAM_AU3885305	MPX	AU3885201	AU3885202	F
7-0024-005||22_21188913_G_T	22_21188913_G_T	7-0024-005||22_21188913_G_T||hg19.ET-5297-3-23198-27157-27251-37398[.][12]	NDD	chr22	21188913	G	T	21188850	21188943	-	exonic.3ss	30	0.978348	-0.11578	exonic	PI4KA	.	synonymous SNV	PI4KA:NM_058004:exon3:c.C304A:p.R102R	.	.	.	.	.	.	.	.	.	.	.	.	.	.	.	7-0024-005	Yuen2017	genome	autism	FAM_7-0024-005	MPX	7-0024-002	7-0024-001	F
AU012803||2_20162057_G_A	2_20162057_G_A	AU012803||2_20162057_G_A||hg19.ET-57539-3-26400-30796-30829-32509[.][2]	NDD	chr2	20162057	G	A	20162056	20162088	-	exonic.5ss	-1	0.747103	-0.115591	exonic	WDR35	.	nonsynonymous SNV	WDR35:NM_001006657:exon11:c.C1226T:p.T409M	T	B	B	N	D	N	T	N	T	T	T	N	15.88	-0.815	0.978	AU012803	Yuen2017	genome	autism	FAM_AU012804	MPX	AU012802	AU012801	F
13254.p1||1_43213394_C_T	1_43213394_C_T	13254.p1||1_43213394_C_T||hg19.ET-64175-3-21885-22286-22362-22672[.][55][UPT][DNT]	NDD	chr1	43213394	C	T	43213394	43213469	-	exonic.5ss	0	0.973384	-0.114624	exonic	P3H1	.	synonymous SNV	P3H1:NM_001146289:exon13:c.G1914A:p.T638T,P3H1:NM_001243246:exon13:c.G1914A:p.T638T,P3H1:NM_022356:exon13:c.G1914A:p.T638T	.	.	.	.	.	.	.	.	.	.	.	.	.	.	.	13254.p1	SSC	genome	autism	13254	simplex	13254.f1	13254.m1	male	133	279	253
13858.p1||1_241676892_T_C	1_241676892_T_C	13858.p1||1_241676892_T_C||hg19.ET-2271-3-5604-9072-9183-10642[.][253][UPT][DNT]	NDD	chr1	241676892	T	C	241676903	241677013	-	downstream	11	0.977388	-0.11063	intronic	FH	.	.	.	.	.	.	.	.	.	.	.	.	.	.	.	.	.	.	13858.p1	Turner_2017;SSC	genome	autism	;13858	;simplex	;13858.f1	;13858.m1	;male	;91	NA;382	NA;359
14192.p1||20_35533906_T_A	20_35533906_T_A	14192.p1||20_35533906_T_A||hg19.ET-25939-3-43626-49340-49480-50594[.][27]	NDD	chr20	35533906	T	A	35533767	35533906	-	exonic.3ss	0	0.975628	-0.108384	exonic	SAMHD1	.	nonsynonymous SNV	SAMHD1:NM_015474:exon12:c.A1271T:p.D424V	D	D	D	D	D	M	D	D	D	D	.	D	32	1.061	1	14192.p1	SSC	genome	autism	14192	simplex	14192.f1	14192.m1	female	102	392	388
14217.p1||7_157177678_A_G	7_157177678_A_G	14217.p1||7_157177678_A_G||hg19.ET-10049-3-48362-50851-50993-51525[.][116][UPT][DNT]	NDD	chr7	157177678	A	G	157177561	157177702	+	exonic.5ss	-24	0.982149	-0.108023	exonic	DNAJB6	.	nonsynonymous SNV	DNAJB6:NM_005494:exon7:c.A596G:p.N199S,DNAJB6:NM_058246:exon7:c.A596G:p.N199S	D	D	D	N	D	H	T	D	T	T	D	D	22.8	0.003	0.877	14217.p1	SSC	genome	autism	14217	simplex	14217.f1	14217.m1	male	109	301	274
AU4012302||11_47197406_T_C	11_47197406_T_C	AU4012302||11_47197406_T_C||hg19.ET-84364-3-3610-4202-4275-4812[.][419][UPT][DNT]	NDD	chr11	47197406	T	C	47197402	47197474	-	exonic.5ss	-4	0.86343	-0.106576	exonic	ARFGAP2	.	nonsynonymous SNV	ARFGAP2:NM_001242832:exon3:c.A260G:p.N87S,ARFGAP2:NM_032389:exon3:c.A260G:p.N87S	T	B	B	D	D	L	T	D	T	T	T	D	15.38	1.061	0.998	AU4012302	Yuen2017	genome	autism	FAM_AU4012302	SPX	AU4012201	AU4012202	M
11341.p1||5_177161374_T_C	5_177161374_T_C	11341.p1||5_177161374_T_C||hg19.ET-285596-3-48642-49100-49125-51404[.][3]	NDD	chr5	177161374	T	C	177161381	177161405	-	downstream	7	0.956534	-0.106375	intronic	FAM153A	.	.	.	.	.	.	.	.	.	.	.	.	.	.	.	.	.	.	11341.p1	Turner_2017	genome	autism
AU1404301||10_86017726_C_T	10_86017726_C_T	AU1404301||10_86017726_C_T||hg19.ET-5995-3-12391-15840-15954-16455[.][11][DNT]	NDD	chr10	86017726	C	T	86017649	86017762	+	exonic.5ss	-36	0.617106	-0.103338	exonic	RGR	.	synonymous SNV	RGR:NM_001012720:exon6:c.C708T:p.I236I,RGR:NM_002921:exon6:c.C720T:p.I240I	.	.	.	.	.	.	.	.	.	.	.	.	.	.	.	AU1404301	Yuen2017	genome	autism	FAM_AU1404302	MPX	AU1404201	AU1404202	M
11749.p1||6_30303740_C_T	6_30303740_C_T	11749.p1||6_30303740_C_T||hg19.ET-56658-3-10033-14901-15132-19064[.][13]	NDD	chr6	30303740	C	T	30303522	30303752	+	exonic.5ss	-12	0.893784	-0.103176	exonic	TRIM39;TRIM39-RPP21	.	synonymous SNV	TRIM39-RPP21:NM_001199119:exon3:c.C768T:p.F256F,TRIM39:NM_021253:exon5:c.C768T:p.F256F,TRIM39:NM_172016:exon5:c.C768T:p.F256F	.	.	.	.	.	.	.	.	.	.	.	.	.	.	.	11749.p1	Turner_2017;SSC	genome	autism	;11749	;simplex	;11749.f1	;11749.m1	;male	;31	NA;379	NA;372
2-0158-003||1_41113499_G_A	1_41113499_G_A	2-0158-003||1_41113499_G_A||hg19.ET-9783-3-3259-20810-20985-26696[.][4][UPT]	NDD	chr1	41113499	G	A	41113340	41113514	-	exonic.3ss	15	0.934862	-0.101639	UTR5	RIMS3	NM_014747:c.-5902C>T	.	.	.	.	.	.	.	.	.	.	.	.	.	.	.	.	.	2-0158-003	Yuen2017	genome	autism	FAM_2-0158-003	SPX	2-0158-002	2-0158-001	M
13298.p1||2_42871389_G_A	2_42871389_G_A	13298.p1||2_42871389_G_A||hg19.ET-57504-3-74706-78596-78714-90669[.][59]	NDD	chr2	42871389	G	A	42871267	42871384	+	downstream	5	0.983025	-0.100216	intronic	MTA3	.	.	.	.	.	.	.	.	.	.	.	.	.	.	.	.	.	.	13298.p1	Turner_2017;SSC	genome	autism	;13298	;simplex	;13298.f1	;13298.m1	;male	;84	NA;507	NA;472
AU3807302||1_120846087_C_T	1_120846087_C_T	AU3807302||1_120846087_C_T||hg19.ET-653820-3-6048-9990-10115-18487[.][9][DNT]	NDD	chr1	120846087	C	T	120845995	120846119	+	exonic.5ss	-32	0.982672	-0.0988154	exonic	FAM72B	.	nonsynonymous SNV	FAM72B:NM_001100910:exon3:c.C323T:p.A108V,FAM72B:NM_001320149:exon3:c.C203T:p.A68V	.	.	.	.	.	.	.	.	.	.	.	.	.	.	.	AU3807302	Yuen2017	genome	autism	FAM_AU3807302	MPX	AU3807201	AU3807202	M
12335.p1||2_219537583_G_A	2_219537583_G_A	12335.p1||2_219537583_G_A||hg19.ET-27148-3-3190-3715-3888-4599[.][29][UPT]	NDD	chr2	219537583	G	A	219537464	219537636	+	exonic.5ss	-53	0.905903	-0.0970199	exonic	STK36	.	nonsynonymous SNV	STK36:NM_001243313:exon2:c.G31A:p.G11R,STK36:NM_015690:exon2:c.G31A:p.G11R	D	D	D	D	D	H	T	D	D	D	D	D	32	1.048	1	12335.p1	SSC	genome	autism	12335	simplex	12335.f1	12335.m1	female	47	397	395
12851.p1||1_192779402_G_A	1_192779402_G_A	12851.p1||1_192779402_G_A||hg19.ET-5997-3-3143-4127-4393-4942[.][1][UPT][DNT]	NDD	chr1	192779402	G	A	192779296	192779561	+	exonic.3ss	106	0.974987	-0.0967866	intronic	RGS2	.	.	.	.	.	.	.	.	.	.	.	.	.	.	.	.	.	.	12851.p1	SSC	genome	autism	12851	simplex	12851.f1	12851.m1	male	49	475	471
14455.p1||22_51018177_T_C	22_51018177_T_C	14455.p1||22_51018177_T_C||hg19.ET-1120-3-9026-9169-9273-9492[.][81][UPT][DNT]	NDD	chr22	51018177	T	C	51018156	51018259	-	exonic.5ss	-21	0.903909	-0.0964001	exonic	CHKB	.	nonsynonymous SNV	CHKB:NM_005198:exon9:c.A1010G:p.D337G	T	B	B	N	D	L	T	N	T	T	T	D	16.93	1.042	0.995	14455.p1	SSC	genome	autism	14455	simplex	14455.f1	14455.m1	female	85	426	422
14538.p1||16_30679970_T_C	16_30679970_T_C	14538.p1||16_30679970_T_C||hg19.ET-64319-3-6166-7103-7187-7315[.][40][DNT]	NDD	chr16	30679970	T	C	30679881	30679964	+	downstream	6	0.972732	-0.0958436	intronic	FBRS	.	.	.	.	.	.	.	.	.	.	.	.	.	.	.	.	.	.	14538.p1	SSC	genome	autism	14538	simplex	14538.f1	14538.m1	male	99	299	280
14016.p1||6_160445739_A_G	6_160445739_A_G	14016.p1||6_160445739_A_G||hg19.ET-3482-3-44687-58473-58606-61086[.][8]	NDD	chr6	160445739	A	G	160445604	160445736	+	downstream	3	0.976549	-0.0930137	intronic	IGF2R	.	.	.	.	.	.	.	.	.	.	.	.	.	.	.	.	.	.	14016.p1	SSC	genome	autism	14016	simplex	14016.f1	14016.m1	male	92	289	274
12011.p1||3_159604035_C_T	3_159604035_C_T	12011.p1||3_159604035_C_T||hg19.ET-29970-3-800030-819955-820073-821456[.][92][DNT]	NDD	chr3	159604035	C	T	159603996	159604113	+	exonic.3ss	39	0.955221	-0.0925953	exonic	IQCJ-SCHIP1;SCHIP1	.	synonymous SNV	SCHIP1:NM_001197108:exon3:c.C222T:p.N74N,SCHIP1:NM_001197109:exon3:c.C189T:p.N63N,SCHIP1:NM_001197107:exon4:c.C879T:p.N293N,SCHIP1:NM_014575:exon4:c.C918T:p.N306N,IQCJ-SCHIP1:NM_001197114:exon6:c.C1065T:p.N355N,IQCJ-SCHIP1:NM_001197113:exon7:c.C1146T:p.N382N	.	.	.	.	.	.	.	.	.	.	.	.	.	.	.	12011.p1	SSC	genome	autism	12011	simplex	12011.f1	12011.m1	male	86	573	482
14542.p1||1_156438168_C_T	1_156438168_C_T	14542.p1||1_156438168_C_T||hg19.ET-4209-3-34958-35438-35745-36081[.][9]	NDD	chr1	156438168	C	T	156437785	156438091	-	upstream	-77	0.790621	-0.0925355	intronic	MEF2D	.	.	.	.	.	.	.	.	.	.	.	.	.	.	.	.	.	.	14542.p1	SSC	genome	autism	14542	simplex	14542.f1	14542.m1	male	63	429	446
AU048206||2_191896203_G_A	2_191896203_G_A	AU048206||2_191896203_G_A||hg19.ET-6775-3-121639-123080-123147-123516[.][11]	NDD	chr2	191896203	G	A	191896176	191896242	-	exonic.5ss	-27	0.977984	-0.0917045	exonic	STAT4	.	nonsynonymous SNV	STAT4:NM_001243835:exon22:c.C2084T:p.P695L,STAT4:NM_003151:exon22:c.C2084T:p.P695L	T	B	B	D	D	L	D	N	D	D	D	D	23	1.048	0.98	AU048206	Yuen2017	genome	autism	FAM_AU048206	MPX	AU048202	AU048201	M
14153.p1||22_37453538_G_A	22_37453538_G_A	14153.p1||22_37453538_G_A||hg19.ET-79734-3-7673-8659-8755-10574[.][41][DNT]	NDD	chr22	37453538	G	A	37453438	37453533	+	downstream	5	0.980334	-0.0879388	intronic	KCTD17	.	.	.	.	.	.	.	.	.	.	.	.	.	.	.	.	.	.	14153.p1	Turner2016	genome	autism
11459.p1||11_33049217_A_G	11_33049217_A_G	11459.p1||11_33049217_A_G||hg19.ET-91614-3-13186-14822-14950-15739[.][13]	NDD	chr11	33049217	A	G	33049232	33049359	+	upstream	-15	0.918036	-0.087007	intronic	DEPDC7	.	.	.	.	.	.	.	.	.	.	.	.	.	.	.	.	.	.	11459.p1	SSC	genome	autism	11459	simplex	11459.f1	11459.m1	male	88	314	351
12324.p1||6_42905450_T_A	6_42905450_T_A	12324.p1||6_42905450_T_A||hg19.ET-10695-3-9549-11595-11718-11968[.][113][DNT]	NDD	chr6	42905450	T	A	42905455	42905577	+	upstream	-5	0.981185	-0.0844971	intronic	CNPY3;CNPY3-GNMT	.	.	.	.	.	.	.	.	.	.	.	.	.	.	.	.	.	.	12324.p1	SSC	genome	autism	12324	simplex	12324.f1	12324.m1	male	124	379	348
12497.p1||5_148422396_G_A	5_148422396_G_A	12497.p1||5_148422396_G_A||hg19.ET-79628-3-21642-23337-23481-24557[.][9]	NDD	chr5	148422396	G	A	148422257	148422400	-	exonic.3ss	4	0.902656	-0.0825337	exonic	SH3TC2	.	synonymous SNV	SH3TC2:NM_024577:exon5:c.C390T:p.Y130Y	.	.	.	.	.	.	.	.	.	.	.	.	.	.	.	12497.p1	SSC	genome	autism	12497	simplex	12497.f1	12497.m1	male	63	443	447
13306.p1||10_15634273_G_A	10_15634273_G_A	13306.p1||10_15634273_G_A||hg19.ET-8516-3-125565-130467-130547-136107[.][3]	NDD	chr10	15634273	G	A	15634224	15634303	-	exonic.3ss	30	0.983438	-0.08246	exonic	ITGA8	.	nonsynonymous SNV	ITGA8:NM_001291494:exon21:c.C2197T:p.R733C,ITGA8:NM_003638:exon22:c.C2242T:p.R748C	D	D	D	D	D	M	T	D	T	T	D	D	35	1.048	0.998	13306.p1	SSC	genome	autism	13306	simplex	13306.f1	13306.m1	male	82	484	399
12032.p1||1_32790137_C_T	1_32790137_C_T	12032.p1||1_32790137_C_T||hg19.ET-3065-3-27676-35372-35447-37832[.][270][UPT][DNT]	NDD	chr1	32790137	C	T	32790080	32790154	+	exonic.5ss	-17	0.978621	-0.0821234	exonic	HDAC1	.	nonsynonymous SNV	HDAC1:NM_004964:exon4:c.C338T:p.S113F	T	P	P	D	D	M	T	D	D	D	D	D	34	0.852	1	12032.p1	SSC	genome	autism	12032	simplex	12032.f1	12032.m1	male	71	368	317
7-0100-004||7_89915577_T_A	7_89915577_T_A	7-0100-004||7_89915577_T_A||hg19.ET-79846-3-40883-44107-44226-46060[.][13]	NDD	chr7	89915577	T	A	89915595	89915713	+	upstream	-18	0.940301	-0.0820774	intronic	CFAP69	.	.	.	.	.	.	.	.	.	.	.	.	.	.	.	.	.	.	7-0100-004	Yuen2017	genome	autism	FAM_7-0100-004	MPX	7-0100-002	7-0100-001	F
AU071204||12_133393296_G_A	12_133393296_G_A	AU071204||12_133393296_G_A||hg19.ET-2802-3-9845-15028-15181-18421[.][4][DNT]	NDD	chr12	133393296	G	A	133393246	133393398	-	exonic.5ss	-50	0.760281	-0.0814294	exonic	GOLGA3	.	nonsynonymous SNV	GOLGA3:NM_001172557:exon3:c.C236T:p.P79L,GOLGA3:NM_005895:exon3:c.C236T:p.P79L	T	B	B	N	N	L	T	N	T	T	T	N	7.265	0.079	0	AU071204	Yuen2017	genome	autism	FAM_AU071204	MPX	AU071202	AU071201	M
2-1297-003||2_162565230_G_A	2_162565230_G_A	2-1297-003||2_162565230_G_A||hg19.ET-57282-3-3232-87359-87495-149638[.][5][UPT]	NDD	chr2	162565230	G	A	162565204	162565339	+	exonic.3ss	26	0.145856	-0.0799697	UTR5	SLC4A10	NM_001178016:c.-29G>A	.	.	.	.	.	.	.	.	.	.	.	.	.	.	.	.	.	2-1297-003	Yuen2017	genome	autism	FAM_2-1297-004	MPX	2-1297-002	2-1297-001	M
AU4191302||19_24288849_C_T	19_24288849_C_T	AU4191302||19_24288849_C_T||hg19.ET-9534-3-3164-21766-21893-22374[.][26][UPT]	NDD	chr19	24288849	C	T	24288742	24288868	+	exonic.5ss	-19	0.879318	-0.078887	exonic	ZNF254	.	synonymous SNV	ZNF254:NM_001278665:exon2:c.C138T:p.Y46Y,ZNF254:NM_203282:exon2:c.C138T:p.Y46Y,ZNF254:NM_001278661:exon3:c.C15T:p.Y5Y,ZNF254:NM_001278662:exon3:c.C15T:p.Y5Y,ZNF254:NM_001278677:exon4:c.C15T:p.Y5Y	.	.	.	.	.	.	.	.	.	.	.	.	.	.	.	AU4191302	Yuen2017	genome	autism	FAM_AU4191302	SPX	AU4191201	AU4191202	M
14517.p1||3_132247145_C_T	3_132247145_C_T	14517.p1||3_132247145_C_T||hg19.ET-23317-3-111573-113480-113624-116289[.][27][UPT][DNT]	NDD	chr3	132247145	C	T	132247033	132247176	+	exonic.5ss	-31	0.979112	-0.0785599	exonic	DNAJC13	.	nonsynonymous SNV	DNAJC13:NM_015268:exon54:c.C6494T:p.A2165V,DNAJC13:NM_001329126:exon55:c.C6509T:p.A2170V	D	B	B	D	D	M	T	D	T	T	T	D	25.8	0.892	1	14517.p1	SSC	genome	autism	14517	simplex	14517.f1	14517.m1	male	97	298	350
14391.p1||14_51245480_T_C	14_51245480_T_C	14391.p1||14_51245480_T_C||hg19.ET-51199-3-41410-55317-55357-56982[.][16][UPT]	NDD	chr14	51245480	T	C	51245483	51245522	-	downstream	3	0.983906	-0.0763521	intronic	NIN	.	.	.	.	.	.	.	.	.	.	.	.	.	.	.	.	.	.	14391.p1	Turner_2017;SSC	genome	autism	;14391	;simplex	;14391.f1	;14391.m1	;male	;35	NA;393	NA;336
11169.p1||7_128622321_G_A	7_128622321_G_A	11169.p1||7_128622321_G_A||hg19.ET-23534-3-74006-75849-75926-78142[.][44][DNT]	NDD	chr7	128622321	G	A	128622302	128622378	-	exonic.5ss	-19	0.982303	-0.0757823	exonic	TNPO3	.	nonsynonymous SNV	TNPO3:NM_001191028:exon13:c.C1648T:p.R550C,TNPO3:NM_012470:exon14:c.C1840T:p.R614C	D	D	P	D	D	M	T	D	D	D	D	D	28.3	0.143	0.999	11169.p1	SSC	genome	autism	11169	simplex	11169.f1	11169.m1	male	87	386	379
12573.p1||15_26828534_C_T	15_26828534_C_T	12573.p1||15_26828534_C_T||hg19.ET-2562-3-155475-193374-193457-196332[.][25]	NDD	chr15	26828534	C	T	26828479	26828561	-	exonic.3ss	27	0.961443	-0.0755871	exonic	GABRB3	.	nonsynonymous SNV	GABRB3:NM_001191320:exon3:c.G234A:p.M78I,GABRB3:NM_001191321:exon3:c.G276A:p.M92I,GABRB3:NM_000814:exon5:c.G489A:p.M163I,GABRB3:NM_021912:exon5:c.G489A:p.M163I,GABRB3:NM_001278631:exon6:c.G234A:p.M78I	D	D	D	D	D	M	T	D	D	D	D	D	24.3	0.935	0.985	12573.p1	Turner_2017;SSC	genome	autism	;12573	;simplex	;12573.f1	;12573.m1	;male	;70	NA;438	NA;444
13985.p1||13_96251708_A_C	13_96251708_A_C	13985.p1||13_96251708_A_C||hg19.ET-22873-3-41704-48282-48342-53620[.][13]	NDD	chr13	96251708	A	C	96251619	96251678	-	upstream	-30	0.942916	-0.074599	intronic	DZIP1	.	.	.	.	.	.	.	.	.	.	.	.	.	.	.	.	.	.	13985.p1	SSC	genome	autism	13985	simplex	13985.f1	13985.m1	male	111	496	402
12469.p1||2_220045455_A_T	2_220045455_A_T	12469.p1||2_220045455_A_T||hg19.ET-79137-3-5029-5453-5538-5845[.][49][UPT]	NDD	chr2	220045455	A	T	220045392	220045476	+	exonic.5ss	-21	0.978508	-0.0744397	exonic	RETREG2	.	nonsynonymous SNV	RETREG2:NM_024293:exon5:c.A619T:p.I207F	D	P	P	D	D	M	T	D	T	T	T	D	26.8	0.16	0.994	12469.p1	SSC	genome	autism	12469	simplex	12469.f1	12469.m1	male	105	362	354
13939.p1||5_140950991_T_G	5_140950991_T_G	13939.p1||5_140950991_T_G||hg19.uc021yep.1_ET16	NDD	chr5	140950991	T	G	140950995	140951003	-	downstream	4	0.160373	-0.0741638	intronic	DIAPH1	.	.	.	.	.	.	.	.	.	.	.	.	.	.	.	.	.	.	13939.p1	SSC	genome	autism	13939	simplex	13939.f1	13939.m1	male	93	512	423
12573.p1||19_55657913_A_T	19_55657913_A_T	12573.p1||19_55657913_A_T||hg19.ET-7138-3-5558-5772-5805-6673[.][134][UPT][DNT]	NDD	chr19	55657913	A	T	55657802	55657834	-	upstream	-79	0.36755	-0.0732914	intronic	TNNT1	.	.	.	.	.	.	.	.	.	.	.	.	.	.	.	.	.	.	12573.p1	Turner_2017	genome	autism
14525.p1||2_166152367_G_A	2_166152367_G_A	14525.p1||2_166152367_G_A||hg19.ET-6326-3-3239-59371-59689-60615[.][9][UPT]	NDD	chr2	166152367	G	A	166152283	166152600	+	exonic.3ss	84	0.960942	-0.0726349	exonic	SCN2A	.	nonsynonymous SNV	SCN2A:NM_001040143:exon1:c.G34A:p.D12N,SCN2A:NM_001040142:exon2:c.G34A:p.D12N,SCN2A:NM_021007:exon2:c.G34A:p.D12N	D	P	B	D	D	L	D	D	D	D	D	D	23.4	0.948	1	14525.p1	SSC	genome	autism	14525	simplex	14525.f1	14525.m1	male	12	520	466
5-0131-003||1_2426392_G_A	1_2426392_G_A	5-0131-003||1_2426392_G_A||hg19.ET-9651-3-18021-21541-21634-22173[.][9]	NDD	chr1	2426392	G	A	2426295	2426387	+	downstream	5	0.963975	-0.0715891	intronic	PLCH2	.	.	.	.	.	.	.	.	.	.	.	.	.	.	.	.	.	.	5-0131-003	Yuen2017	genome	autism	FAM_5-0131-003	SPX	5-0131-002	5-0131-001	M
1-0935-003||2_225714298_C_T	2_225714298_C_T	1-0935-003||2_225714298_C_T||hg19.ET-55619-3-193237-196014-196107-199971[.][3]	NDD	chr2	225714298	C	T	225714224	225714316	-	exonic.3ss	18	0.981814	-0.0706467	exonic	DOCK10	.	nonsynonymous SNV	DOCK10:NM_001290263:exon19:c.G2143A:p.G715R,DOCK10:NM_014689:exon19:c.G2161A:p.G721R	D	D	D	D	D	M	T	D	T	T	D	D	34	0.927	0.999	1-0935-003	Yuen2017	genome	autism	FAM_1-0935-003	SPX	1-0935-002	1-0935-001	F
12817.p1||2_144008169_G_A	2_144008169_G_A	12817.p1||2_144008169_G_A||hg19.ET-55843-3-102339-124181-124271-309271[.][39]	NDD	chr2	144008169	G	A	144008080	144008169	+	exonic.5ss	0	0.986876	-0.070186	exonic	ARHGAP15	.	synonymous SNV	ARHGAP15:NM_018460:exon6:c.G474A:p.Q158Q	.	.	.	.	.	.	.	.	.	.	.	.	.	.	.	12817.p1	SSC	genome	autism	12817	simplex	12817.f1	12817.m1	male	34	494	439
2-1168-003||10_127677225_C_T	10_127677225_C_T	2-1168-003||10_127677225_C_T||hg19.ET-92565-3-86800-95012-95137-101878[.][13][DNT]	NDD	chr10	127677225	C	T	127677120	127677244	+	exonic.5ss	-19	0.971661	-0.0700532	exonic	FANK1	.	synonymous SNV	FANK1:NM_001350939:exon3:c.C297T:p.L99L,FANK1:NM_145235:exon3:c.C297T:p.L99L	.	.	.	.	.	.	.	.	.	.	.	.	.	.	.	2-1168-003	Yuen2017	genome	autism	FAM_2-1168-003	SPX	2-1168-002	2-1168-001	M
12724.p1||10_93608137_T_C	10_93608137_T_C	12724.p1||10_93608137_T_C||hg19.ET-80351-3-50547-52989-53242-54118[.][14][UPT]	NDD	chr10	93608137	T	C	93608140	93608392	+	upstream	-3	0.976285	-0.0695831	intronic	TNKS2	.	.	.	.	.	.	.	.	.	.	.	.	.	.	.	.	.	.	12724.p1	Turner_2017;SSC	genome	autism	;12724	;simplex	;12724.f1	;12724.m1	;female	;103	NA;349	NA;324
14147.p1||3_100560848_T_C	3_100560848_T_C	14147.p1||3_100560848_T_C||hg19.ET-25890-3-150119-154451-154493-155632[.][4][UPT]	NDD	chr3	100560848	T	C	100560842	100560883	-	exonic.5ss	-6	0.415821	-0.069574	exonic	ABI3BP	.	nonsynonymous SNV	ABI3BP:NM_001349329:exon18:c.A1567G:p.T523A,ABI3BP:NM_001349330:exon19:c.A1633G:p.T545A,ABI3BP:NM_001349331:exon19:c.A1633G:p.T545A	D	B	B	.	D	.	T	N	T	T	T	D	11.98	0.141	0.772	14147.p1	SSC	genome	autism	14147	simplex	14147.f1	14147.m1	male	93	343	369
1-0037-004||3_71021763_G_A	3_71021763_G_A	1-0037-004||3_71021763_G_A||hg19.ET-27086-3-610049-614313-614435-616184[.][37][UPT]	NDD	chr3	71021763	G	A	71021706	71021827	-	exonic.5ss	-57	0.973015	-0.0690617	exonic	FOXP1	.	nonsynonymous SNV	FOXP1:NM_001244813:exon12:c.C1295T:p.A432V,FOXP1:NM_001349344:exon12:c.C1292T:p.A431V,FOXP1:NM_001244812:exon13:c.C1367T:p.A456V,FOXP1:NM_001244815:exon13:c.C1601T:p.A534V,FOXP1:NM_001349337:exon13:c.C1598T:p.A533V,FOXP1:NM_001349342:exon13:c.C1295T:p.A432V,FOXP1:NM_001349343:exon13:c.C1292T:p.A431V,FOXP1:NM_001244814:exon14:c.C1595T:p.A532V,FOXP1:NM_001244816:exon17:c.C1595T:p.A532V,FOXP1:NM_001…	D	D	D	D	D	M	D	D	D	D	D	D	28.8	1.048	1	1-0037-004	Yuen2017	genome	autism	FAM_1-0037-004	SPX	1-0037-002	1-0037-001	M
13835.p1||3_119205717_C_T	3_119205717_C_T	13835.p1||3_119205717_C_T||hg19.ET-56983-3-19450-20895-20995-22991[.][16][UPT]	NDD	chr3	119205717	C	T	119205680	119205779	+	exonic.3ss	37	0.931936	-0.0675795	exonic	POGLUT1	.	nonsynonymous SNV	POGLUT1:NM_152305:exon7:c.C676T:p.R226W	D	D	D	D	D	H	T	D	T	T	D	D	35	0.892	1	13835.p1	SSC	genome	autism	13835	simplex	13835.f1	13835.m1	female	126	426	413
AU3636301||16_27226320_C_A	16_27226320_C_A	AU3636301||16_27226320_C_A||hg19.ET-79831-3-13266-14390-14523-15459[.][10][DNT]	NDD	chr16	27226320	C	A	27226197	27226329	+	exonic.5ss	-9	0.779798	-0.0672576	exonic	KDM8	.	synonymous SNV	KDM8:NM_001145348:exon4:c.C903A:p.I301I,KDM8:NM_024773:exon4:c.C789A:p.I263I	.	.	.	.	.	.	.	.	.	.	.	.	.	.	.	AU3636301	Yuen2017	genome	autism	FAM_AU3636302	MPX	AU3636201	AU3636202	M
2-1196-003||12_53708082_C_T	12_53708082_C_T	2-1196-003||12_53708082_C_T||hg19.ET-8086-3-9878-10187-10331-14907[.][69][DNT]	NDD	chr12	53708082	C	T	53708082	53708225	-	exonic.5ss	0	0.976822	-0.0649006	exonic	AAAS	.	nonsynonymous SNV	AAAS:NM_001173466:exon6:c.G590A:p.R197Q,AAAS:NM_015665:exon7:c.G689A:p.R230Q	D	D	D	D	D	M	D	D	D	D	D	D	35	0.892	0.927	2-1196-003	Yuen2016	genome	autism	FAM_2-1196-003	SPX	2-1196-002	2-1196-001	M
AU1933301||11_7614436_A_G	11_7614436_A_G	AU1933301||11_7614436_A_G||hg19.ET-8495-3-55003-82367-82460-86795[.][30][DNT]	NDD	chr11	7614436	A	G	7614363	7614455	+	exonic.5ss	-19	0.980863	-0.0647401	exonic	PPFIBP2	.	nonsynonymous SNV	PPFIBP2:NM_003621:exon4:c.A353G:p.K118R	D	D	D	D	D	L	T	N	T	T	T	D	29.3	1.199	1	AU1933301	Yuen2017	genome	autism	FAM_AU1933302	SPX	AU1933201	AU1933202	F
12664.p1||15_65209717_C_T	15_65209717_C_T	12664.p1||15_65209717_C_T||hg19.ET-348094-3-6999-8484-8613-13019[.][2]	NDD	chr15	65209717	C	T	65209585	65209713	+	downstream	4	0.377984	-0.0644655	intronic	ANKDD1A	.	.	.	.	.	.	.	.	.	.	.	.	.	.	.	.	.	.	12664.p1	Turner_2017	genome	autism
1-0572-003||5_72865484_G_A	5_72865484_G_A	1-0572-003||5_72865484_G_A||hg19.ET-84135-3-5832-6724-6903-7813[.][9]	NDD	chr5	72865484	G	A	72865322	72865500	+	exonic.5ss	-16	0.960062	-0.0643923	exonic	UTP15	.	synonymous SNV	UTP15:NM_001284430:exon5:c.G474A:p.P158P,UTP15:NM_032175:exon5:c.G531A:p.P177P	.	.	.	.	.	.	.	.	.	.	.	.	.	.	.	1-0572-003	Yuen2017	genome	autism	FAM_1-0572-003	SPX	1-0572-002	1-0572-001	M
1-0901-003||15_74914430_C_G	15_74914430_C_G	1-0901-003||15_74914430_C_G||hg19.ET-1198-3-14854-16748-16845-17122[.][138][DNT]	NDD	chr15	74914430	C	G	74914461	74914557	+	upstream	-31	0.870796	-0.0640206	intronic	CLK3	.	.	.	.	.	.	.	.	.	.	.	.	.	.	.	.	.	.	1-0901-003	Yuen2017	genome	autism	FAM_1-0901-004	MPX	1-0901-002	1-0901-001	M
12859.p1||9_70483224_C_A	9_70483224_C_A	12859.p1||9_70483224_C_A||hg19.ET-220869-3-8803-9898-9990-18099[.][2][UPT]	NDD	chr9	70483224	C	A	70483188	70483279	-	exonic.5ss	-36	0.948015	-0.0637494	exonic	CBWD5	.	nonsynonymous SNV	CBWD5:NM_001024916:exon4:c.G394T:p.D132Y,CBWD5:NM_001330668:exon4:c.G394T:p.D132Y	.	.	.	.	.	.	.	.	.	.	.	.	.	.	.	12859.p1	Turner_2017	genome	autism
14368.p1||9_128092441_C_G	9_128092441_C_G	14368.p1||9_128092441_C_G||hg19.ET-26130-3-67758-71246-71387-73094[.][22][UPT]	NDD	chr9	128092441	C	G	128092357	128092497	+	exonic.5ss	-56	0.973621	-0.0636362	exonic	GAPVD1	.	nonsynonymous SNV	GAPVD1:NM_001282681:exon10:c.C2054G:p.T685S,GAPVD1:NM_001330778:exon11:c.C2117G:p.T706S,GAPVD1:NM_015635:exon11:c.C2117G:p.T706S,GAPVD1:NM_001330777:exon12:c.C2054G:p.T685S,GAPVD1:NM_001282679:exon13:c.C2117G:p.T706S,GAPVD1:NM_001282680:exon13:c.C2117G:p.T706S	T	D	D	D	D	N	T	N	T	T	D	D	23.4	0.852	1	14368.p1	SSC	genome	autism	14368	simplex	14368.f1	14368.m1	male	77	310	276
13874.p1||8_145580668_C_T	8_145580668_C_T	13874.p1||8_145580668_C_T||hg19.ET-26233-3-4085-4402-4534-4608[.][15]	NDD	chr8	145580668	C	T	145580650	145580781	-	exonic.5ss	-18	0.621465	-0.0628576	exonic	FBXL6	.	synonymous SNV	FBXL6:NM_012162:exon4:c.G753A:p.L251L,FBXL6:NM_024555:exon4:c.G735A:p.L245L	.	.	.	.	.	.	.	.	.	.	.	.	.	.	.	13874.p1	Turner2016;SSC	genome	autism	;13874	;simplex	;13874.f1	;13874.m1	;male	;89	NA;529	NA;462
1-0590-003||16_55568370_A_G	16_55568370_A_G	1-0590-003||16_55568370_A_G||hg19.ET-54947-3-26882-28442-28477-31577[.][10][UPT]	NDD	chr16	55568370	A	G	55568355	55568389	+	exonic.3ss	15	0.980992	-0.0627143	exonic	LPCAT2	.	nonsynonymous SNV	LPCAT2:NM_017839:exon7:c.A778G:p.T260A	D	P	P	D	D	M	D	D	D	D	D	D	24.1	1.119	0.998	1-0590-003	Yuen2017	genome	autism	FAM_1-0590-003	SPX	1-0590-002	1-0590-001	M
14455.p1||5_156929856_G_A	5_156929856_G_A	14455.p1||5_156929856_G_A||hg19.ET-8728-3-73107-75795-75973-79113[.][10][DNT]	NDD	chr5	156929856	G	A	156929811	156929988	-	exonic.5ss	-45	0.964679	-0.0623585	exonic	ADAM19	.	synonymous SNV	ADAM19:NM_033274:exon12:c.C1263T:p.N421N	.	.	.	.	.	.	.	.	.	.	.	.	.	.	.	14455.p1	SSC	genome	autism	14455	simplex	14455.f1	14455.m1	female	85	426	422
AU4235301||19_10220695_A_C	19_10220695_A_C	AU4235301||19_10220695_A_C||hg19.ET-5032-3-12485-12690-12798-12900[.][78][UPT][DNT]	NDD	chr19	10220695	A	C	10220589	10220696	+	exonic.5ss	-1	0.966508	-0.0618131	exonic	PPAN;PPAN-P2RY11	.	nonsynonymous SNV	PPAN:NM_001346141:exon6:c.A538C:p.T180P,PPAN-P2RY11:NM_001040664:exon7:c.A697C:p.T233P,PPAN-P2RY11:NM_001198690:exon7:c.A697C:p.T233P,PPAN:NM_001346139:exon7:c.A694C:p.T232P,PPAN:NM_001346140:exon7:c.A694C:p.T232P,PPAN:NM_020230:exon7:c.A697C:p.T233P	T	P	P	.	D	M	T	N	T	T	D	D	23.3	1.199	0.816	AU4235301	Yuen2017	genome	autism	FAM_AU4235303	MPX	AU4235201	AU4235202	M
2-0272-004||2_187532499_A_G	2_187532499_A_G	2-0272-004||2_187532499_A_G||hg19.ET-3685-3-80168-80608-80714-81699[.][23][DNT]	NDD	chr2	187532499	A	G	187532398	187532503	+	exonic.5ss	-4	0.976767	-0.0609111	exonic	ITGAV	.	nonsynonymous SNV	ITGAV:NM_001145000:exon22:c.A2321G:p.Y774C,ITGAV:NM_001144999:exon24:c.A2291G:p.Y764C,ITGAV:NM_002210:exon24:c.A2429G:p.Y810C	D	D	D	D	D	M	T	D	T	T	D	D	28.8	1.199	1	2-0272-004	Yuen2017	genome	autism	FAM_2-0272-004	MPX	2-0272-002	2-0272-001	M
13371.p1||1_93580638_C_T	1_93580638_C_T	13371.p1||1_93580638_C_T||hg19.ET-22823-3-38549-38753-38854-39235[.][45]	NDD	chr1	93580638	C	T	93580545	93580645	+	exonic.5ss	-7	0.980271	-0.0603322	exonic	MTF2	.	nonsynonymous SNV	MTF2:NM_001164393:exon3:c.C170T:p.T57I,MTF2:NM_001164392:exon5:c.C476T:p.T159I,MTF2:NM_007358:exon5:c.C476T:p.T159I,MTF2:NM_001164391:exon6:c.C170T:p.T57I	D	P	B	N	D	L	D	N	T	T	D	D	23.6	0.935	0.999	13371.p1	SSC	genome	autism	13371	simplex	13371.f1	13371.m1	male	75	378	397
14404.p1||16_58201131_C_T	16_58201131_C_T	14404.p1||16_58201131_C_T||hg19.ET-1459-3-33194-33570-33672-34194[.][33]	NDD	chr16	58201131	C	T	58201111	58201212	-	exonic.5ss	-20	0.97703	-0.0600573	exonic	CSNK2A2	.	nonsynonymous SNV	CSNK2A2:NM_001896:exon8:c.G706A:p.G236R	D	D	D	D	D	M	T	D	D	D	D	D	34	0.935	0.995	14404.p1	Turner_2017	genome	autism
AU4306302||17_20921424_C_G	17_20921424_C_G	AU4306302||17_20921424_C_G||hg19.ET-23326-3-26956-27928-28098-30140[.][34][UPT][DNT]	NDD	chr17	20921424	C	G	20921255	20921424	-	exonic.3ss	0	0.981292	-0.0589242	exonic	USP22	.	nonsynonymous SNV	USP22:NM_015276:exon5:c.G521C:p.G174A	D	D	P	D	D	M	T	D	T	T	.	D	24.8	0.7	0.483	AU4306302	Yuen2017	genome	autism	FAM_AU4306302	SPX	AU4306201	AU4306202	M
14206.p1||13_29008379_T_G	13_29008379_T_G	14206.p1||13_29008379_T_G||hg19.ET-2321-3-59908-63908-64071-64173[.][28][UPT]	NDD	chr13	29008379	T	G	29008195	29008357	-	upstream	-22	0.978334	-0.0580298	intronic	FLT1	.	.	.	.	.	.	.	.	.	.	.	.	.	.	.	.	.	.	14206.p1	SSC	genome	autism	14206	simplex	14206.f1	14206.m1	female	35	272	266
2-0003-004||5_80422988_T_C	5_80422988_T_C	2-0003-004||5_80422988_T_C||hg19.ET-5924-3-166079-169385-169475-222486[.][7]	NDD	chr5	80422988	T	C	80422893	80422982	+	downstream	6	0.964224	-0.0580045	intronic	RASGRF2	.	.	.	.	.	.	.	.	.	.	.	.	.	.	.	.	.	.	2-0003-004	Yuen2017	genome	autism	FAM_2-0003-004	MPX	2-0003-002	2-0003-001	M
1-0292-005||10_93716323_G_A	10_93716323_G_A	1-0292-005||10_93716323_G_A||hg19.ET-9044-3-32895-35549-35679-36246[.][6]	NDD	chr10	93716323	G	A	93716285	93716414	+	exonic.3ss	38	0.974143	-0.0570594	exonic	BTAF1	.	nonsynonymous SNV	BTAF1:NM_003972:exon7:c.G740A:p.R247Q	T	D	B	D	D	L	D	N	T	T	D	D	23.6	1.048	0.998	1-0292-005	Yuen2017	genome	autism	FAM_1-0292-005	MPX	1-0292-002	1-0292-001	M
5-0111-003||15_85403233_C_T	15_85403233_C_T	5-0111-003||15_85403233_C_T||hg19.ET-57538-3-46224-46357-46393-48955[.][8]	NDD	chr15	85403233	C	T	85403268	85403303	+	upstream	-35	0.913996	-0.0567888	intronic	ALPK3	.	.	.	.	.	.	.	.	.	.	.	.	.	.	.	.	.	.	5-0111-003	Yuen2017	genome	autism	FAM_5-0111-003	SPX	5-0111-002	5-0111-001	M
12056.p1||15_66198459_G_A	15_66198459_G_A	12056.p1||15_66198459_G_A||hg19.ET-84465-3-343001-350596-350653-357803[.][6][UPT][DNT]	NDD	chr15	66198459	G	A	66198423	66198479	-	exonic.3ss	20	0.951822	-0.0564002	exonic	MEGF11	.	nonsynonymous SNV	MEGF11:NM_032445:exon21:c.C2731T:p.R911C	T	D	B	N	D	L	D	N	T	T	D	D	26.2	0.073	0.994	12056.p1	SSC	genome	autism	12056	simplex	12056.f1	12056.m1	male	92	336	317
14210.p1||4_727582_C_T	4_727582_C_T	14210.p1||4_727582_C_T||hg19.ET-10336-3-28327-30888-31006-32147[.][82]	NDD	chr4	727582	C	T	727461	727578	+	downstream	4	0.940661	-0.056174	intronic	PCGF3	.	.	.	D	.	.	.	D	.	T	N	T	T	T	N	8.438	-2.885	0.078	14210.p1	SSC	genome	autism	14210	simplex	14210.f1	14210.m1	male	125	447	456
2-0102-004||1_233362984_G_A	1_233362984_G_A	2-0102-004||1_233362984_G_A||hg19.ET-80003-3-61869-71342-71488-80529[.][6]	NDD	chr1	233362984	G	A	233362972	233363117	-	exonic.5ss	-12	0.972212	-0.055872	exonic	PCNX2	.	nonsynonymous SNV	PCNX2:NM_014801:exon10:c.C2492T:p.A831V	D	D	D	.	D	M	T	D	D	D	D	D	26.2	0.953	0.902	2-0102-004	Yuen2017	genome	autism	FAM_2-0102-004	MPX	2-0102-002	2-0102-001	M
11037.p1||1_110029122_T_C	1_110029122_T_C	11037.p1||1_110029122_T_C||hg19.ET-127002-3-5184-5567-5672-6068[.][5][UPT]	NDD	chr1	110029122	T	C	110029128	110029232	+	upstream	-6	0.920612	-0.0558627	intronic	ATXN7L2	.	.	.	.	.	.	.	.	.	.	.	.	.	.	.	.	.	.	11037.p1	SSC	genome	autism	11037	simplex	11037.f1	11037.m1	male	86	333	332
1-0028-003||3_16475543_C_T	3_16475543_C_T	1-0028-003||3_16475543_C_T||hg19.ET-23180-3-22991-82678-82865-107232[.][104][DNT]	NDD	chr3	16475543	C	T	16475358	16475544	-	exonic.3ss	1	0.983714	-0.055803	exonic	RFTN1	.	synonymous SNV	RFTN1:NM_015150:exon3:c.G147A:p.A49A	.	.	.	.	.	.	.	.	.	.	.	.	.	.	.	1-0028-003	Yuen2017	genome	autism	FAM_1-0028-003	SPX	1-0028-002	1-0028-001	M
14185.p1||8_82629464_T_C	8_82629464_T_C	14185.p1||8_82629464_T_C||hg19.ET-79752-3-6123-7016-7056-9190[.][63][UPT]	NDD	chr8	82629464	T	C	82629484	82629523	-	downstream	20	0.327596	-0.0555904	intronic	ZFAND1	.	.	.	.	.	.	.	.	.	.	.	.	.	.	.	.	.	.	14185.p1	SSC	genome	autism	14185	simplex	14185.f1	14185.m1	male	69	417	383
5-0014-004||19_44654629_A_G	19_44654629_A_G	5-0014-004||19_44654629_A_G||hg19.ET-10780-3-10341-11856-11949-17695[.][28][UPT][DNT]	NDD	chr19	44654629	A	G	44654566	44654658	+	exonic.5ss	-29	0.911565	-0.055382	exonic	ZNF234	.	nonsynonymous SNV	ZNF234:NM_001144824:exon5:c.A206G:p.K69R,ZNF234:NM_006630:exon5:c.A206G:p.K69R	T	B	B	.	N	L	T	N	T	T	T	N	1.188	-0.066	0.006	5-0014-004	Yuen2017	genome	autism	FAM_5-0014-004	MPX	5-0014-002	5-0014-001	M
11587.p1||17_76420174_G_A	17_76420174_G_A	11587.p1||17_76420174_G_A||hg19.ET-9489-3-44670-48407-48539-49264[.][1][UPT][DNT]	NDD	chr17	76420174	G	A	76420142	76420273	+	exonic.3ss	32	0.411476	-0.0547367	exonic	DNAH17	.	nonsynonymous SNV	DNAH17:NM_173628:exon81:c.C13202T:p.P4401L	.	D	P	N	D	H	T	.	T	T	T	D	33	1.048	0.864	11587.p1	Turner_2017;SSC	genome	autism	;11587	;simplex	;11587.f1	;11587.m1	;male	;111	NA;307	NA;278
5-0146-003||7_138833067_G_A	7_138833067_G_A	5-0146-003||7_138833067_G_A||hg19.ET-79989-3-16547-17462-17634-30204[.][19][DNT]	NDD	chr7	138833067	G	A	138832952	138833123	+	exonic.5ss	-56	0.680693	-0.0538068	exonic	TTC26	.	nonsynonymous SNV	TTC26:NM_001144923:exon6:c.G568A:p.A190T,TTC26:NM_001144920:exon7:c.G661A:p.A221T,TTC26:NM_001287513:exon7:c.G346A:p.A116T,TTC26:NM_001318333:exon7:c.G241A:p.A81T,TTC26:NM_001321740:exon7:c.G661A:p.A221T,TTC26:NM_001321742:exon7:c.G661A:p.A221T,TTC26:NM_024926:exon7:c.G661A:p.A221T	D	D	D	D	D	M	T	D	D	D	D	D	34	1.048	1	5-0146-003	Yuen2017	genome	autism	FAM_5-0146-003	SPX	5-0146-002	5-0146-001	M
1-0075-003||11_563318_G_A	11_563318_G_A	1-0075-003||11_563318_G_A||hg19.ET-8045-3-4806-5218-5508-5587[.][1][DNT]	NDD	chr11	563318	G	A	563189	563478	+	exonic.3ss	129	0.54774	-0.0533505	exonic;splicing	RASSF7;RASSF7	NM_001143994:exon4:c.951+1G>A;NM_003475:exon4:c.951+1G>A	nonsynonymous SNV	RASSF7:NM_001143993:exon4:c.G952A:p.V318I	T	D	P	.	D	.	T	N	T	T	D	D	23	0.953	0.165	1-0075-003	Yuen2017	genome	autism	FAM_1-0075-003	SPX	1-0075-002	1-0075-001	F
1-0898-003||3_123046669_C_T	3_123046669_C_T	1-0898-003||3_123046669_C_T||hg19.ET-111-3-122902-123786-123928-126083[.][16]	NDD	chr3	123046669	C	T	123046465	123046606	-	upstream	-63	0.971478	-0.0520071	intronic	ADCY5	.	.	.	.	.	.	.	.	.	.	.	.	.	.	.	.	.	.	1-0898-003	Yuen2017	genome	autism	FAM_1-0898-003	SPX	1-0898-002	1-0898-001	M
12303.p1||12_49220135_T_G	12_49220135_T_G	12303.p1||12_49220135_T_G||hg19.ET-784-3-14338-14935-15087-15327[.][33]	NDD	chr12	49220135	T	G	49220150	49220301	+	upstream	-15	0.943211	-0.0519199	intronic	CACNB3	.	.	.	.	.	.	.	.	.	.	.	.	.	.	.	.	.	.	12303.p1	Turner_2017;SSC	genome	autism	;12303	;simplex	;12303.f1	;12303.m1	;male	;74	NA;350	NA;285
2-1429-003||12_110418851_C_A	12_110418851_C_A	2-1429-003||12_110418851_C_A||hg19.ET-9815-3-16017-18343-18438-31886[.][41][DNT]	NDD	chr12	110418851	C	A	110418757	110418851	-	exonic.3ss	0	0.981987	-0.0518896	exonic	GIT2	.	nonsynonymous SNV	GIT2:NM_001135213:exon7:c.G624T:p.R208S,GIT2:NM_001135214:exon7:c.G624T:p.R208S,GIT2:NM_001330153:exon7:c.G624T:p.R208S,GIT2:NM_001330154:exon7:c.G624T:p.R208S,GIT2:NM_014776:exon7:c.G624T:p.R208S,GIT2:NM_057169:exon7:c.G624T:p.R208S,GIT2:NM_057170:exon7:c.G624T:p.R208S,GIT2:NM_139201:exon7:c.G624T:p.R208S	T	B	B	D	D	L	T	D	T	T	.	D	25.7	0.852	1	2-1429-003	Yuen2017	genome	autism	FAM_2-1429-004	MPX	2-1429-002	2-1429-001	M
14604.p1||11_20117286_C_T	11_20117286_C_T	14604.p1||11_20117286_C_T||hg19.ET-89797-3-745475-747947-748043-749852[.][20]	NDD	chr11	20117286	C	T	20117218	20117313	+	exonic.5ss	-27	0.978685	-0.0515076	exonic	NAV2	.	synonymous SNV	NAV2:NM_001111019:exon20:c.C3177T:p.L1059L,NAV2:NM_001111018:exon30:c.C5793T:p.L1931L,NAV2:NM_145117:exon30:c.C5985T:p.L1995L,NAV2:NM_182964:exon30:c.C5994T:p.L1998L,NAV2:NM_001244963:exon32:c.C6162T:p.L2054L	.	.	.	.	.	.	.	.	.	.	.	.	.	.	.	14604.p1	SSC	genome	autism	14604	simplex	14604.f1	14604.m1	male	64	384	368
7-0149-003||6_31603711_T_A	6_31603711_T_A	7-0149-003||6_31603711_T_A||hg19.ET-7916-3-18077-18294-18377-18536[.][117][UPT][DNT]	NDD	chr6	31603711	T	A	31603744	31603826	+	upstream	-33	0.984001	-0.0507154	intronic	PRRC2A	.	.	.	.	.	.	.	.	.	.	.	.	.	.	.	.	.	.	7-0149-003	Yuen2017	genome	autism	FAM_7-0149-003	SPX	7-0149-002	7-0149-001	M
13309.p1||1_169094277_G_A	1_169094277_G_A	13309.p1||1_169094277_G_A||hg19.ET-481-3-7790-21175-21331-23515[.][228][UPT][DNT]	NDD	chr1	169094277	G	A	169094122	169094277	+	exonic.5ss	0	0.984355	-0.0506772	exonic	ATP1B1	.	nonsynonymous SNV	ATP1B1:NM_001677:exon3:c.G382A:p.D128N	T	B	B	N	N	M	T	N	T	T	.	D	13.68	0.125	0.988	13309.p1	Turner_2017;SSC	genome	autism	;13309	;simplex	;13309.f1	;13309.m1	;male	;78	NA;459	NA;456
12929.p1||3_155551287_G_A	3_155551287_G_A	12929.p1||3_155551287_G_A||hg19.ET-9197-3-23603-23874-23992-27556[.][19][UPT]	NDD	chr3	155551287	G	A	155551257	155551374	-	exonic.5ss	-30	0.938032	-0.0505872	exonic	SLC33A1	.	synonymous SNV	SLC33A1:NM_001190992:exon4:c.C1236T:p.I412I,SLC33A1:NM_004733:exon4:c.C1236T:p.I412I	.	.	.	.	.	.	.	.	.	.	.	.	.	.	.	12929.p1	SSC	genome	autism	12929	simplex	12929.f1	12929.m1	male	101	505	303
