# Supplementary material for: Reference-informed prediction of alternative splicing and splicing-altering mutations from sequences
Source: HighWire-hosted journal article supplement (doi:10.1101/gr.279044.124), 2024-07-01
Supplement: Supplemental_Table_S8.xlsx [file Supplemental_Table_S8.xlsx]

## Sheet: Table S8
Table S8: Splicing-altering de novo mutations (dPSI<-0.05) predicted in the WES dataset. Each variant was assigned to a proximal exon, and the variant to exon mapping was provided in the var2exonID column, and the exon coordinates were specified in columns 'exonStart' and 'exonEnd'.
event.ID	varID	var2exonID	Pheno	chrom	varPOS	Ref	Alt	exonStart	exonEnd	strand	var2exon.type	var2exon.dist	ref PSI	dPSI	Func.refGene	Gene.refGene	GeneDetail.refGene	ExonicFunc.refGene	AAChange.refGene	SIFT_pred	Polyphen2_HDIV_pred	Polyphen2_HVAR_pred	LRT_pred	MutationTaster_pred	MutationAssessor_pred	FATHMM_pred	PROVEAN_pred	MetaSVM_pred	MetaLR_pred	M-CAP_pred	fathmm-MKL_coding_pred	CADD_phred	phyloP20way_mammalian	phastCons20way_mammalian	SampleID	StudyName	SequenceType	PrimaryPhenotype	FAMILYID	FAMILYTYPE	FATHERID	MOTHERID	gender	NVIQ	FatherAgeBirth	MotherAgeBirth
10C108736||1_22030752_T_A	1_22030752_T_A	10C108736||1_22030752_T_A||hg19.ET-84196-3-80469-81803-81934-82577[.][28][DNT]	NDD	chr1	22030752	T	A	22030755	22030885	-	downstream	3	0.961786	-0.885385	intronic	USP48	.	.	.	.	.	.	.	.	.	.	.	.	.	.	.	.	.	.	10C108736	ASC_v15_VCF	exome	autism	10C108736		10C109042	10C108735	Male
AC02-1155-01||4_140272765_G_T	4_140272765_G_T	AC02-1155-01||4_140272765_G_T||hg19.ET-80155-3-52765-52983-53090-55504[.][16]	NDD	chr4	140272765	G	T	140272659	140272765	+	exonic.5ss	0	0.98216	-0.804782	exonic	NAA15	.	nonsynonymous SNV	NAA15:NM_057175:exon9:c.G1014T:p.K338N	D	D	D	D	D	M	T	D	D	D	.	D	26.5	0.127	0.996	AC02-1155-01	DeRubeis2014;ASC_v15_VCF	exome	autism	;AC02-1155-01		;AC02-1155-02	;AC02-1155-03	;Male
G01-GEA-65-HI||10_95083024_T_G	10_95083024_T_G	G01-GEA-65-HI||10_95083024_T_G||hg19.ET-26509-3-159492-161959-162048-162144[.][34]	NDD	chr10	95083024	T	G	95083027	95083115	-	downstream	3	0.94038	-0.745094	intronic	MYOF	.	.	.	.	.	.	.	.	.	.	.	.	.	.	.	.	.	.	G01-GEA-65-HI	ASC_v15_VCF	exome	autism	G01-GEA-65-HI		G01-GEA-65-PA	G01-GEA-65-MA	Male
11246.p1||4_56756552_G_T	4_56756552_G_T	11246.p1||4_56756552_G_T||hg19.ET-55763-3-33279-39573-39737-40665[.][13][UPT]	NDD	chr4	56756552	G	T	56756389	56756552	+	exonic.5ss	0	0.969726	-0.722632	exonic	EXOC1	.	nonsynonymous SNV	EXOC1:NM_178237:exon11:c.G1494T:p.K498N,EXOC1:NM_001024924:exon12:c.G1539T:p.K513N,EXOC1:NM_018261:exon12:c.G1539T:p.K513N	T	D	P	D	D	L	.	N	T	T	.	D	25.1	1.048	1	11246.p1	Krumm	exome	autism
57||14_21863457_C_G	14_21863457_C_G	57||14_21863457_C_G||hg19.ET-57680-3-44482-44946-45001-45179[.][25]	NDD	chr14	21863457	C	G	21863457	21863511	-	exonic.5ss	0	0.97919	-0.702309	exonic	CHD8	.	nonsynonymous SNV	CHD8:NM_001170629:exon28:c.G5182C:p.A1728P,CHD8:NM_020920:exon29:c.G4345C:p.A1449P	T	B	B	N	D	L	D	N	T	T	D	D	19.18	0.935	1	57	Heyne_2018	exome	ID		simplex			male
Lelieveld_57||14_21863457_C_G	14_21863457_C_G	Lelieveld_57||14_21863457_C_G||hg19.ET-57680-3-44482-44946-45001-45179[.][25]	NDD	chr14	21863457	C	G	21863457	21863511	-	exonic.5ss	0	0.97919	-0.702309	exonic	CHD8	.	nonsynonymous SNV	CHD8:NM_001170629:exon28:c.G5182C:p.A1728P,CHD8:NM_020920:exon29:c.G4345C:p.A1449P	T	B	B	N	D	L	D	N	T	T	D	D	19.18	0.935	1	Lelieveld_57	Lelieveld2016	exome	intellectualDisability
13317.p1||7_87607732_G_A	7_87607732_G_A	13317.p1||7_87607732_G_A||hg19.ET-53616-3-3936-47085-47162-144375[.][28][UPT][DNT]	NDD	chr7	87607732	G	A	87607651	87607727	+	downstream	5	0.973642	-0.656946	intronic	ADAM22	.	.	.	.	.	.	.	.	.	.	.	.	.	.	.	.	.	.	13317.p1	Iossifov;ASC_v15_VCF	exome	autism	;13317		;13317.fa	;13317.mo	;Male
12972.p1||3_73112821_T_G	3_73112821_T_G	12972.p1||3_73112821_T_G||hg19.ET-151987-3-67093-69705-69780-70035[.][19][DNT]	NDD	chr3	73112821	T	G	73112824	73112898	+	upstream	-3	0.969587	-0.649883	intronic	PPP4R2	.	.	.	.	.	.	.	.	.	.	.	.	.	.	.	.	.	.	12972.p1	Iossifov;ASC_v15_VCF	exome	autism	;12972		;SSC06512	;SSC06506	;Male
DDDP106635||10_70546449_G_C	10_70546449_G_C	DDDP106635||10_70546449_G_C||hg19.ET-55749-3-68005-68332-68479-69713[.][26][UPT]	NDD	chr10	70546449	G	C	70546303	70546449	+	exonic.5ss	0	0.972216	-0.642454	exonic	CCAR1	.	nonsynonymous SNV	CCAR1:NM_001282959:exon20:c.G2835C:p.Q945H,CCAR1:NM_001282960:exon20:c.G2835C:p.Q945H,CCAR1:NM_018237:exon21:c.G2880C:p.Q960H	T	D	D	D	D	M	T	D	T	T	.	D	22.9	0.953	1	DDDP106635	Heyne_2018	exome	DD		simplex			female
G01-GEA-263-HI||2_166170276_G_A	2_166170276_G_A	G01-GEA-263-HI||2_166170276_G_A||hg19.ET-6326-3-75687-77218-77360-77500[.][8]	NDD	chr2	166170276	G	A	166170130	166170271	+	downstream	5	0.976981	-0.625002	intronic	SCN2A	.	.	.	.	.	.	.	.	.	.	.	.	.	.	.	.	.	.	G01-GEA-263-HI	ASC_v15_VCF	exome	autism	G01-GEA-263-HI		G01-GEA-263-PA	G01-GEA-263-MA	Female
DDDP114877||18_2750120_G_A	18_2750120_G_A	DDDP114877||18_2750120_G_A||hg19.ET-23347-3-94760-97155-97235-97462[.][7]	NDD	chr18	2750120	G	A	2750041	2750120	+	exonic.5ss	0	0.962538	-0.612304	exonic	SMCHD1	.	nonsynonymous SNV	SMCHD1:NM_015295:exon31:c.G4007A:p.R1336K	T	B	B	D	D	L	T	N	T	T	.	D	6.205	1.048	0.997	DDDP114877	Heyne_2018	exome	DD		simplex			male
DDDP109553||18_52924546_C_G	18_52924546_C_G	DDDP109553||18_52924546_C_G||hg19.ET-6925-3-379009-381566-381643-384257[.][60][DNT]	NDD	chr18	52924546	C	G	52924546	52924622	-	exonic.5ss	0	0.93857	-0.58186	exonic	TCF4	.	nonsynonymous SNV	TCF4:NM_001243234:exon7:c.G666C:p.L222F,TCF4:NM_001243235:exon7:c.G666C:p.L222F,TCF4:NM_001243236:exon7:c.G666C:p.L222F,TCF4:NM_001348214:exon7:c.G663C:p.L221F,TCF4:NM_001348215:exon7:c.G498C:p.L166F,TCF4:NM_001348216:exon7:c.G666C:p.L222F,TCF4:NM_001330605:exon9:c.G756C:p.L252F,TCF4:NM_001243232:exon10:c.G933C:p.L311F,TCF4:NM_001243233:exon10:c.G756C:p.L252F,TCF4:NM_001306208:exon10:c.G933C:p.L3…	D	D	D	D	D	M	T	D	T	T	D	D	29.4	0.852	0.958	DDDP109553	Heyne_2018	exome	DD		simplex			female
13516.p1||14_37777232_A_G	14_37777232_A_G	13516.p1||14_37777232_A_G||hg19.ET-145282-3-90535-113143-113177-113436[.][13]	NDD	chr14	37777232	A	G	37777261	37777294	+	upstream	-29	0.939178	-0.57343	intronic	MIPOL1	.	.	.	.	.	.	.	.	.	.	.	.	.	.	.	.	.	.	13516.p1	Iossifov;ASC_v15_VCF	exome	autism	;13516		;SSC08026	;SSC08012	;Male
12||X_112035060_C_G	X_112035060_C_G	12||X_112035060_C_G||hg19.ET-154796-3-38869-51834-51984-53033[.][7]	NDD	chrX	112035060	C	G	112035060	112035209	-	exonic.5ss	0	0.981986	-0.51222	exonic	AMOT	.	nonsynonymous SNV	AMOT:NM_001113490:exon6:c.G1926C:p.Q642H,AMOT:NM_133265:exon7:c.G699C:p.Q233H	D	D	D	D	D	M	T	D	T	T	D	D	24	0.852	0.995	12	Heyne_2018	exome	ID		simplex			female
Lelieveld_12||X_112035060_C_G	X_112035060_C_G	Lelieveld_12||X_112035060_C_G||hg19.ET-154796-3-38869-51834-51984-53033[.][7]	NDD	chrX	112035060	C	G	112035060	112035209	-	exonic.5ss	0	0.981986	-0.51222	exonic	AMOT	.	nonsynonymous SNV	AMOT:NM_001113490:exon6:c.G1926C:p.Q642H,AMOT:NM_133265:exon7:c.G699C:p.Q233H	D	D	D	D	D	M	T	D	T	T	D	D	24	0.852	0.995	Lelieveld_12	Lelieveld2016	exome	intellectualDisability
13307.p1||17_76067246_G_A	17_76067246_G_A	13307.p1||17_76067246_G_A||hg19.ET-57690-3-66687-69848-69929-71800[.][15][DNT]	NDD	chr17	76067246	G	A	76067166	76067246	+	exonic.5ss	0	0.967314	-0.508383	exonic	TNRC6C	.	synonymous SNV	TNRC6C:NM_001142640:exon7:c.G2850A:p.P950P,TNRC6C:NM_018996:exon7:c.G2859A:p.P953P	.	.	.	.	.	.	.	.	.	.	.	.	.	.	.	13307.p1	Iossifov;ASC_v15_VCF	exome	autism	;13307		;SSC08066	;SSC08059	;Male
AC05-0059-01||3_179104422_G_T	3_179104422_G_T	AC05-0059-01||3_179104422_G_T||hg19.ET-55669-3-41030-41741-41938-45312[.][25]	NDD	chr3	179104422	G	T	179104221	179104417	+	downstream	5	0.97563	-0.505567	intronic	MFN1	.	.	.	.	.	.	.	.	.	.	.	.	.	.	.	.	.	.	AC05-0059-01	ASC_v15_VCF	exome	autism	AC05-0059-01		AC05-0059-02	AC05-0059-03	Male
DDDP110413||6_157431695_G_A	6_157431695_G_A	DDDP110413||6_157431695_G_A||hg19.ET-57492-3-309976-335542-335632-358098[.][9][DNT]	NDD	chr6	157431695	G	A	157431606	157431695	+	exonic.5ss	0	0.973313	-0.492157	exonic	ARID1B	.	nonsynonymous SNV	ARID1B:NM_001346813:exon6:c.G2332A:p.G778S,ARID1B:NM_017519:exon6:c.G2332A:p.G778S,ARID1B:NM_020732:exon7:c.G2371A:p.G791S	D	D	D	D	D	M	T	D	T	T	.	D	26	0.953	0.963	DDDP110413	Heyne_2018	exome	DD		simplex			male
58058P||1_214546051_T_G	1_214546051_T_G	58058P||1_214546051_T_G||hg19.ET-5784-3-178463-181842-181971-184990[.][10]	NDD	chr1	214546051	T	G	214546054	214546182	-	downstream	3	0.912064	-0.488253	intronic	PTPN14	.	.	.	.	.	.	.	.	.	.	.	.	.	.	.	.	.	.	58058P	McMichael2015	exome	cerebral_palsy
691-05-105394||8_80567297_G_T	8_80567297_G_T	691-05-105394||8_80567297_G_T||hg19.ET-11075-3-33737-47057-47249-57001[.][340][UPT][DNT]	NDD	chr8	80567297	G	T	80567106	80567297	+	exonic.5ss	0	0.982464	-0.47332	exonic	STMN2	.	nonsynonymous SNV	STMN2:NM_001199214:exon4:c.G480T:p.K160N,STMN2:NM_007029:exon4:c.G480T:p.K160N	D	D	P	D	D	M	.	D	D	T	.	D	26.6	1.048	0.997	691-05-105394	ASC_v15_VCF	exome	autism	691-05-105394		693-05-105402	692-05-105399	Male
364-05-104982||8_38272292_C_T	8_38272292_C_T	364-05-104982||8_38272292_C_T||hg19.ET-2260-3-55965-56933-57056-57205[.][62][UPT][DNT]	NDD	chr8	38272292	C	T	38272297	38272419	-	downstream	5	0.975331	-0.471586	intronic	FGFR1	.	.	.	.	.	.	.	.	.	.	.	.	.	.	.	.	.	.	364-05-104982	ASC_v15_VCF	exome	autism	364-05-104982		481-05-104067	363-05-104064	Female
EGAN00001101374||3_41275627_C_G	3_41275627_C_G	EGAN00001101374||3_41275627_C_G||hg19.ET-1499-3-37417-37688-37847-39273[.][47]	NDD	chr3	41275627	C	G	41275630	41275788	+	upstream	-3	0.980074	-0.47069	intronic	CTNNB1	.	.	.	.	.	.	.	.	.	.	.	.	.	.	.	.	.	.	EGAN00001101374	ASC_v15_VCF	exome	autism	EGAN00001101374		EGAN00001101219	EGAN00001100984	Female
80001104634||1_6270998_G_A	1_6270998_G_A	80001104634||1_6270998_G_A||hg19.ET-388591-3-7310-7741-7810-7892[.][5]	NDD	chr1	6270998	G	A	6270930	6270998	+	exonic.5ss	0	0.680789	-0.455525	exonic	RNF207	.	synonymous SNV	RNF207:NM_207396:exon11:c.G1011A:p.K337K	.	.	.	.	.	.	.	.	.	.	.	.	.	.	.	80001104634	ASC_v15_VCF	exome	autism	80001104634		80001104634-2	80001104634-1	Male
NDAR_INVUH366DLU_wes1||18_21752335_C_T	18_21752335_C_T	NDAR_INVUH366DLU_wes1||18_21752335_C_T||hg19.ET-114876-3-222857-228386-228494-229371[.][46][UPT][DNT]	NDD	chr18	21752335	C	T	21752340	21752447	-	downstream	5	0.977712	-0.442841	intronic	OSBPL1A	.	.	.	.	.	.	.	.	.	.	.	.	.	.	.	.	.	.	NDAR_INVUH366DLU_wes1	De_Rubeis_Nature_2014	exome	autism	NDAR_INVUH366DLU_wes1		NDAR_INVZP714ZP0_wes1	NDAR_INVUU239AM9_wes1	Male
10C110253||21_40641966_T_C	21_40641966_T_C	10C110253||21_40641966_T_C||hg19.ET-54014-3-46504-46753-46888-51767[.][12]	NDD	chr21	40641966	T	C	40641825	40641959	-	upstream	-7	0.962242	-0.429845	intronic	BRWD1	.	.	.	.	.	.	.	.	.	.	.	.	.	.	.	.	.	.	10C110253	ASC_v15_VCF	exome	autism	10C110253		10C110256	10C110257	Male
13817.p1||2_120858272_A_G	2_120858272_A_G	13817.p1||2_120858272_A_G||hg19.ET-57669-3-90259-90671-90787-117660[.][8][DNT]	NDD	chr2	120858272	A	G	120858275	120858390	+	upstream	-3	0.975323	-0.418743	intronic	EPB41L5	.	.	.	.	.	.	.	.	.	.	.	.	.	.	.	.	.	.	13817.p1	Krumm;ASC_v15_VCF	exome	autism	;13817		;13817.fa	;13817.mo	;Female
DDDP112112||15_72874528_G_T	15_72874528_G_T	DDDP112112||15_72874528_G_T||hg19.ET-25820-3-109666-110749-110862-111882[.][58][UPT][DNT]	NDD	chr15	72874528	G	T	72874416	72874528	+	exonic.5ss	0	0.980631	-0.415679	exonic	ARIH1	.	nonsynonymous SNV	ARIH1:NM_005744:exon13:c.G1589T:p.R530I	D	D	P	D	D	M	D	D	D	D	.	D	33	1.047	0.995	DDDP112112	Heyne_2018	exome	DD		simplex			female
12358.p1||18_52928697_C_T	18_52928697_C_T	12358.p1||18_52928697_C_T||hg19.ET-6925-3-369127-377424-377492-378930[.][90][DNT]	NDD	chr18	52928697	C	T	52928697	52928764	-	exonic.5ss	0	0.983871	-0.403232	exonic	TCF4	.	synonymous SNV	TCF4:NM_001243234:exon5:c.G510A:p.S170S,TCF4:NM_001243235:exon5:c.G510A:p.S170S,TCF4:NM_001243236:exon5:c.G510A:p.S170S,TCF4:NM_001348214:exon5:c.G510A:p.S170S,TCF4:NM_001348215:exon5:c.G342A:p.S114S,TCF4:NM_001348216:exon5:c.G510A:p.S170S,TCF4:NM_001330605:exon7:c.G600A:p.S200S,TCF4:NM_001243232:exon8:c.G777A:p.S259S,TCF4:NM_001243233:exon8:c.G600A:p.S200S,TCF4:NM_001306208:exon8:c.G777A:p.S259S…	.	.	.	.	.	.	.	.	.	.	.	.	.	.	.	12358.p1	SSC_Iossifov_2014	exome	autism	12358		12358.fa	12358.mo	Female
14450.p1||17_60111145_T_C	17_60111145_T_C	14450.p1||17_60111145_T_C||hg19.ET-9969-3-32820-34298-34496-36644[.][7][UPT]	NDD	chr17	60111145	T	C	60111148	60111345	-	downstream	3	0.968746	-0.391662	intronic	MED13	.	.	.	.	.	.	.	.	.	.	.	.	.	.	.	.	.	.	14450.p1	Iossifov;ASC_v15_VCF	exome	autism	;14450		;14450.fa	;14450.mo	;Male
14668.p1||4_83378196_G_T	4_83378196_G_T	14668.p1||4_83378196_G_T||hg19.ET-58478-3-27282-29342-29466-32408[.][52][UPT][DNT]	NDD	chr4	83378196	G	T	83378068	83378191	+	downstream	5	0.97746	-0.390869	intronic	ENOPH1	.	.	.	.	.	.	.	.	.	.	.	.	.	.	.	.	.	.	14668.p1	Iossifov;ASC_v15_VCF	exome	autism	;14668		;37333	;37335	;Male
11102.p1||11_117098927_C_T	11_117098927_C_T	11102.p1||11_117098927_C_T||hg19.ET-9159-3-5719-6745-6880-7773[.][26][UPT][DNT]	NDD	chr11	117098927	C	T	117098932	117099066	-	downstream	5	0.96398	-0.384295	intronic	PCSK7	.	.	.	.	.	.	.	.	.	.	.	.	.	.	.	.	.	.	11102.p1	Iossifov;ASC_v15_VCF	exome	autism	;11102		;SSC00127	;SSC00126	;Male
TAS_F3012Y||2_27681013_G_A	2_27681013_G_A	TAS_F3012Y||2_27681013_G_A||hg19.ET-26160-3-33926-34481-34579-34728[.][5][UPT]	NDD	chr2	27681013	G	A	27680993	27681090	-	exonic.5ss	-20	0.954336	-0.383656	exonic	IFT172	.	synonymous SNV	IFT172:NM_015662:exon27:c.C2955T:p.G985G	.	.	.	.	.	.	.	.	.	.	.	.	.	.	.	TAS_F3012Y	ASC_v15_VCF	exome	autism	TAS_F3012Y		TAS_F3012YA	TAS_F3012YB	Male
DDDP109756||12_79747399_G_C	12_79747399_G_C	DDDP109756||12_79747399_G_C||hg19.ET-6857-3-438559-492509-492627-583080[.][32]	NDD	chr12	79747399	G	C	79747282	79747399	+	exonic.5ss	0	0.983736	-0.381711	exonic	SYT1	.	nonsynonymous SNV	SYT1:NM_001135806:exon8:c.G928C:p.D310H,SYT1:NM_001291901:exon8:c.G919C:p.D307H,SYT1:NM_005639:exon9:c.G928C:p.D310H,SYT1:NM_001135805:exon10:c.G928C:p.D310H	D	D	D	D	D	H	T	D	D	D	.	D	33	1.048	0.932	DDDP109756	Heyne_2018	exome	DD		simplex			female
13848.p1||7_106797628_C_G	7_106797628_C_G	13848.p1||7_106797628_C_G||hg19.ET-5577-3-115317-115453-115592-117716[.][26][UPT][DNT]	NDD	chr7	106797628	C	G	106797631	106797769	+	upstream	-3	0.97371	-0.376517	intronic	PRKAR2B	.	.	.	.	.	.	.	.	.	.	.	.	.	.	.	.	.	.	13848.p1	Iossifov	exome	autism
DDDP111920||12_72013095_C_T	12_72013095_C_T	DDDP111920||12_72013095_C_T||hg19.ET-196441-3-47044-47560-47655-51653[.][12][DNT]	NDD	chr12	72013095	C	T	72013095	72013189	-	exonic.5ss	0	0.968679	-0.373542	exonic	ZFC3H1	.	nonsynonymous SNV	ZFC3H1:NM_144982:exon27:c.G5144A:p.R1715Q	D	D	D	D	D	M	T	N	T	T	T	D	29.6	0.931	1	DDDP111920	Heyne_2018	exome	DD		simplex			male
05HI4323A||11_16811430_G_C	11_16811430_G_C	05HI4323A||11_16811430_G_C||hg19.ET-144100-3-226619-227538-227642-228120[.][11][DNT]	NDD	chr11	16811430	G	C	16811322	16811425	-	upstream	-5	0.975879	-0.371072	intronic	PLEKHA7	.	.	.	.	.	.	.	.	.	.	.	.	.	.	.	.	.	.	05HI4323A	ASC_v15_VCF	exome	autism	05HI4323A		05HI4733A	05HI4325A	Female
EGAN00001101115||18_5396338_C_T	18_5396338_C_T	EGAN00001101115||18_5396338_C_T||hg19.ET-23136-3-149930-150655-150787-151280[.][30]	NDD	chr18	5396338	C	T	5396200	5396331	-	upstream	-7	0.978986	-0.369008	intronic	EPB41L3	.	.	.	.	.	.	.	.	.	.	.	.	.	.	.	.	.	.	EGAN00001101115	ASC_v15_VCF	exome	autism	EGAN00001101115		EGAN00001100979	EGAN00001100886	Male
09C81083||13_113771192_A_G	13_113771192_A_G	09C81083||13_113771192_A_G||hg19.ET-2155-3-13013-13978-14088-14685[.][10]	NDD	chr13	113771192	A	G	113771080	113771189	+	downstream	3	0.945497	-0.363685	intronic	F7	.	.	.	.	.	.	.	.	.	.	.	.	.	.	.	.	.	.	09C81083	ASC_v15_VCF	exome	autism	09C81083		09C81085	09C81084	Male
08C74195||5_98218952_T_C	5_98218952_T_C	08C74195||5_98218952_T_C||hg19.ET-1105-3-43957-46297-46447-47411[.][8][UPT][DNT]	NDD	chr5	98218952	T	C	98218792	98218941	-	upstream	-11	0.984456	-0.362153	intronic	CHD1	.	.	.	.	.	.	.	.	.	.	.	.	.	.	.	.	.	.	08C74195	ASC_v15_VCF	exome	autism	08C74195		08C74197	08C74196	Male
12698.p1||12_57573339_G_T	12_57573339_G_T	12698.p1||12_57573339_G_T||hg19.ET-4035-3-53523-53830-54058-54283[.][2]	NDD	chr12	57573339	G	T	57573112	57573339	+	exonic.5ss	0	0.974328	-0.35668	exonic	LRP1	.	nonsynonymous SNV	LRP1:NM_002332:exon29:c.G4966T:p.D1656Y	D	D	D	D	D	M	D	D	D	D	.	D	29	0.953	0.942	12698.p1	Krumm;ASC_v15_VCF	exome	autism	;12698		;SSC06185	;SSC06099	;Male
14601.p1||21_44272360_C_T	21_44272360_C_T	14601.p1||21_44272360_C_T||hg19.ET-10785-3-29021-30265-30335-32347[.][33][DNT]	NDD	chr21	44272360	C	T	44272365	44272434	-	downstream	5	0.97568	-0.355734	intronic	WDR4	.	.	.	.	.	.	.	.	.	.	.	.	.	.	.	.	.	.	14601.p1	Iossifov;ASC_v15_VCF	exome	autism	;14601		;36976	;36978	;Female
DDDP109602||22_41735075_C_G	22_41735075_C_G	DDDP109602||22_41735075_C_G||hg19.ET-23264-3-39793-40438-40629-41253[.][10][DNT]	NDD	chr22	41735075	C	G	41735005	41735195	+	exonic.3ss	70	0.980618	-0.345297	exonic	ZC3H7B	.	nonsynonymous SNV	ZC3H7B:NM_017590:exon9:c.C696G:p.H232Q	T	P	B	N	N	L	T	N	T	T	T	N	7.781	-1.207	0.988	DDDP109602	Heyne_2018	exome	DD		simplex			male
DDDP111456||4_113568705_G_T	4_113568705_G_T	DDDP111456||4_113568705_G_T||hg19.ET-51574-3-13164-13235-13586-13726[.][9][UPT][DNT]	NDD	chr4	113568705	G	T	113568355	113568705	+	exonic.5ss	0	0.961444	-0.344154	exonic	LARP7	.	nonsynonymous SNV	LARP7:NM_015454:exon7:c.G997T:p.D333Y,LARP7:NM_016648:exon7:c.G997T:p.D333Y,LARP7:NM_001267039:exon9:c.G1018T:p.D340Y	D	P	P	N	D	M	T	N	T	T	.	N	26.7	1.048	0.609	DDDP111456	Heyne_2018	exome	DD		simplex			male
DDDP102108||4_39269711_G_C	4_39269711_G_C	DDDP102108||4_39269711_G_C||hg19.ET-57728-3-86737-88591-88688-90572[.][23]	NDD	chr4	39269711	G	C	39269615	39269711	+	exonic.5ss	0	0.982267	-0.339223	exonic	WDR19	.	nonsynonymous SNV	WDR19:NM_001317924:exon29:c.G2878C:p.G960R,WDR19:NM_025132:exon30:c.G3358C:p.G1120R	D	D	D	D	D	M	T	D	D	D	.	D	29.5	1.048	0.954	DDDP102108	Heyne_2018	exome	DD		simplex			male
14170.p1||12_50153110_T_G	12_50153110_T_G	14170.p1||12_50153110_T_G||hg19.ET-7009-3-20253-20711-20812-23194[.][578][UPT][DNT]	NDD	chr12	50153110	T	G	50153004	50153104	+	downstream	6	0.959005	-0.33639	intronic	TMBIM6	.	.	.	.	.	.	.	.	.	.	.	.	.	.	.	.	.	.	14170.p1	Iossifov;ASC_v15_VCF	exome	autism	;14170		;14170.fa	;14170.mo	;Male
056-11-113480||6_76407138_C_A	6_76407138_C_A	056-11-113480||6_76407138_C_A||hg19.ET-26054-3-97018-98519-98612-103739[.][28][UPT]	NDD	chr6	76407138	C	A	76407141	76407233	+	upstream	-3	0.9644	-0.334136	intronic	SENP6	.	.	.	.	.	.	.	.	.	.	.	.	.	.	.	.	.	.	056-11-113480	ASC_v15_VCF	exome	autism	056-11-113480		058-11-113482	057-11-113481	Male
DEASD_1048_001||15_28473359_C_T	15_28473359_C_T	DEASD_1048_001||15_28473359_C_T||hg19.ET-8924-3-95958-96743-96935-102937[.][4][UPT]	NDD	chr15	28473359	C	T	28473364	28473555	-	downstream	5	0.973482	-0.333256	intronic	HERC2	.	.	.	.	.	.	.	.	.	.	.	.	.	.	.	.	.	.	DEASD_1048_001	ASC_v15_VCF	exome	autism	DEASD_1048_001		DEASD_1048_500	DEASD_1048_600	Female
1537-1||20_31997942_T_C	20_31997942_T_C	1537-1||20_31997942_T_C||hg19.ET-6640-3-34597-36561-36758-38004[.][36][UPT]	NDD	chr20	31997942	T	C	31997941	31998137	-	exonic.5ss	-1	0.924309	-0.322723	exonic	SNTA1	.	synonymous SNV	SNTA1:NM_003098:exon6:c.A1236G:p.T412T	.	.	.	.	.	.	.	.	.	.	.	.	.	.	.	1537-1	Fromer2014	exome	schizophrenia
151138||3_53262292_C_A	3_53262292_C_A	151138||3_53262292_C_A||hg19.ET-7086-3-30108-30755-30839-30965[.][276][DNT]	NDD	chr3	53262292	C	A	53262292	53262375	-	exonic.5ss	0	0.985466	-0.320732	exonic	TKT	.	nonsynonymous SNV	TKT:NM_001064:exon11:c.G1479T:p.K493N,TKT:NM_001135055:exon11:c.G1479T:p.K493N,TKT:NM_001258028:exon12:c.G1503T:p.K501N	D	D	D	D	D	L	D	D	D	D	D	D	35	0.935	0.999	151138	ASC_v15_VCF	exome	autism	151138		151139	151140	Male
DDDP110776||6_33400583_G_A	6_33400583_G_A	DDDP110776||6_33400583_G_A||hg19.ET-8831-3-15183-15615-15737-18082[.][5]	NDD	chr6	33400583	G	A	33400462	33400583	+	exonic.5ss	0	0.962796	-0.319026	exonic	SYNGAP1	.	nonsynonymous SNV	SYNGAP1:NM_001130066:exon5:c.G509A:p.R170Q,SYNGAP1:NM_006772:exon5:c.G509A:p.R170Q	D	P	B	U	D	M	T	N	T	T	.	D	28.6	0.902	0.997	DDDP110776	Heyne_2018	exome	DD		simplex			female
13062.p1||9_123927377_A_G	9_123927377_A_G	13062.p1||9_123927377_A_G||hg19.ET-11064-3-76976-79647-79805-80811[.][11]	NDD	chr9	123927377	A	G	123927221	123927378	+	exonic.5ss	-1	0.886857	-0.308712	exonic	CNTRL	.	synonymous SNV	CNTRL:NM_001330762:exon24:c.A3924G:p.Q1308Q,CNTRL:NM_007018:exon33:c.A5580G:p.Q1860Q	.	.	.	.	.	.	.	.	.	.	.	.	.	.	.	13062.p1	Iossifov;ASC_v15_VCF	exome	autism	;13062		;13062.fa	;13062.mo	;Female
DDDP101218||3_71026871_C_T	3_71026871_C_T	DDDP101218||3_71026871_C_T||hg19.ET-27086-3-609162-609267-609347-609947[.][24][UPT]	NDD	chr3	71026871	C	T	71026794	71026873	-	exonic.3ss	2	0.828831	-0.305255	exonic;splicing	FOXP1;FOXP1	NM_001244808:exon16:c.1349-1G>A	nonsynonymous SNV	FOXP1:NM_001244813:exon10:c.G1051A:p.D351N,FOXP1:NM_001349344:exon10:c.G1048A:p.D350N,FOXP1:NM_001244812:exon11:c.G1123A:p.D375N,FOXP1:NM_001244815:exon11:c.G1357A:p.D453N,FOXP1:NM_001349337:exon11:c.G1354A:p.D452N,FOXP1:NM_001349342:exon11:c.G1051A:p.D351N,FOXP1:NM_001349343:exon11:c.G1048A:p.D350N,FOXP1:NM_001244814:exon12:c.G1351A:p.D451N,FOXP1:NM_001244816:exon15:c.G1351A:p.D451N,FOXP1:NM_001…	D	D	D	D	D	M	D	D	T	T	D	D	28.8	0.935	1	DDDP101218	Heyne_2018	exome	DD		simplex			male
14462.p1||11_1466693_G_A	11_1466693_G_A	14462.p1||11_1466693_G_A||hg19.ET-9024-3-58104-58395-58560-58672[.][20]	NDD	chr11	1466693	G	A	1466524	1466688	+	downstream	5	0.972176	-0.294032	intronic	BRSK2	.	.	.	.	.	.	.	.	.	.	.	.	.	.	.	.	.	.	14462.p1	ASC_v15_VCF	exome	autism	14462		14462.fa	14462.mo	Male
13446.p1||17_7755659_G_C	17_7755659_G_C	13446.p1||17_7755659_G_C||hg19.ET-23135-3-15149-15232-15420-15578[.][5]	NDD	chr17	7755659	G	C	7755467	7755654	+	downstream	5	0.932677	-0.292942	intronic	KDM6B	.	.	.	.	.	.	.	.	.	.	.	.	.	.	.	.	.	.	13446.p1	Iossifov;ASC_v15_VCF	exome	autism	;13446		;13446.fa	;13446.mo	;Male
DDDP112618||8_56986328_C_T	8_56986328_C_T	DDDP112618||8_56986328_C_T||hg19.ET-6224-3-3201-3422-3887-4309[.][1][UPT][DNT]	NDD	chr8	56986328	C	T	56986254	56986718	-	exonic.5ss	-74	0.977139	-0.288777	splicing	RPS20	NM_001146227:exon3:c.104-1G>A;NM_001023:exon3:c.104-1G>A	.	.	.	.	.	.	D	.	.	.	.	.	.	D	25.9	0.935	0.769	DDDP112618	Heyne_2018	exome	DD		simplex			female
160708||6_157406028_C_T	6_157406028_C_T	160708||6_157406028_C_T||hg19.ET-57492-3-160647-309732-309976-335542[.][8][DNT]	NDD	chr6	157406028	C	T	157405796	157406039	+	exonic.5ss	-11	0.967794	-0.286919	exonic	ARID1B	.	nonsynonymous SNV	ARID1B:NM_001346813:exon5:c.C2231T:p.A744V,ARID1B:NM_017519:exon5:c.C2231T:p.A744V,ARID1B:NM_020732:exon6:c.C2270T:p.A757V	D	D	D	D	D	M	T	D	T	T	T	D	34	0.935	0.989	160708	ASC_v15_VCF	exome	autism	160708		160709	160710	Male
DDDP110605||18_52942880_G_C	18_52942880_G_C	DDDP110605||18_52942880_G_C||hg19.ET-6925-3-359407-363205-363339-368994[.][147][DNT]	NDD	chr18	52942880	G	C	52942850	52942983	-	exonic.5ss	-30	0.973289	-0.284564	exonic	TCF4	.	nonsynonymous SNV	TCF4:NM_001243234:exon3:c.C279G:p.S93R,TCF4:NM_001243235:exon3:c.C279G:p.S93R,TCF4:NM_001243236:exon3:c.C279G:p.S93R,TCF4:NM_001348214:exon3:c.C279G:p.S93R,TCF4:NM_001348215:exon3:c.C111G:p.S37R,TCF4:NM_001348216:exon3:c.C279G:p.S93R,TCF4:NM_001330605:exon5:c.C369G:p.S123R,TCF4:NM_001243232:exon6:c.C546G:p.S182R,TCF4:NM_001243233:exon6:c.C369G:p.S123R,TCF4:NM_001306208:exon6:c.C546G:p.S182R,TCF4:…	D	D	P	D	D	M	T	D	T	T	D	D	25.1	1.045	1	DDDP110605	Heyne_2018	exome	DD		simplex			female
7902-03-003||4_16025041_A_C	4_16025041_A_C	7902-03-003||4_16025041_A_C||hg19.ET-8842-3-62706-63585-63675-68460[.][33][DNT]	NDD	chr4	16025041	A	C	16024949	16025038	-	upstream	-3	0.982327	-0.284507	intronic	PROM1	.	.	.	.	.	.	.	.	.	.	.	.	.	.	.	.	.	.	7902-03-003	ASC_v15_VCF	exome	autism	7902-03-003		7902-03-003-02	7902-03-003-01	Male
3381-1||1_164532546_C_T	1_164532546_C_T	3381-1||1_164532546_C_T||hg19.ET-5087-3-3654-6878-6952-194853[.][36][UPT]	NDD	chr1	164532546	C	T	164532475	164532548	+	exonic.5ss	-2	0.984078	-0.284178	exonic	PBX1	.	nonsynonymous SNV	PBX1:NM_001204961:exon2:c.C263T:p.T88I,PBX1:NM_001204963:exon2:c.C263T:p.T88I,PBX1:NM_002585:exon2:c.C263T:p.T88I	D	P	B	D	D	M	T	D	T	T	T	D	22.9	0.935	1	3381-1	Fromer2014	exome	schizophrenia
200675260@1082034730||15_74711142_C_T	15_74711142_C_T	200675260@1082034730||15_74711142_C_T||hg19.ET-8482-3-3218-18006-18158-18649[.][103][UPT][DNT]	NDD	chr15	74711142	C	T	74711142	74711293	-	exonic.5ss	0	0.977052	-0.283736	exonic	SEMA7A	.	synonymous SNV	SEMA7A:NM_001146029:exon2:c.G330A:p.T110T,SEMA7A:NM_003612:exon2:c.G330A:p.T110T	.	.	.	.	.	.	.	.	.	.	.	.	.	.	.	200675260@1082034730	ASC_v15_VCF	exome	autism	200675260@1082034730		200675258@1082034706	200675259@1082034729	Male
14009.p1||10_27431317_T_C	10_27431317_T_C	14009.p1||10_27431317_T_C||hg19.ET-10730-3-11993-14935-15034-21035[.][138][UPT][DNT]	NDD	chr10	27431317	T	C	27431316	27431414	-	exonic.5ss	-1	0.852747	-0.281912	exonic	YME1L1	.	synonymous SNV	YME1L1:NM_014263:exon4:c.A429G:p.P143P,YME1L1:NM_139312:exon5:c.A600G:p.P200P	.	.	.	.	.	.	.	.	.	.	.	.	.	.	.	14009.p1	ASC_v15_VCF	exome	autism	14009		SSC10372	SSC10366	Female
43173||12_39069576_C_G	12_39069576_C_G	43173||12_39069576_C_G||hg19.ET-144402-3-231167-232844-232902-237816[.][18][DNT]	NDD	chr12	39069576	C	G	39069519	39069576	-	exonic.3ss	0	0.982314	-0.280971	exonic	CPNE8	.	nonsynonymous SNV	CPNE8:NM_153634:exon18:c.G1375C:p.A459P	D	D	D	D	D	H	T	D	T	T	.	D	33	0.892	0.992	43173	Heyne_2018	exome	EE		simplex			female
DDDP112558||3_176756165_T_C	3_176756165_T_C	DDDP112558||3_176756165_T_C||hg19.ET-79718-3-154132-161826-161948-162088[.][16][DNT]	NDD	chr3	176756165	T	C	176756101	176756222	-	exonic.3ss	57	0.979876	-0.277337	exonic	TBL1XR1	.	nonsynonymous SNV	TBL1XR1:NM_001321195:exon10:c.A722G:p.D241G,TBL1XR1:NM_001321193:exon11:c.A983G:p.D328G,TBL1XR1:NM_024665:exon11:c.A983G:p.D328G,TBL1XR1:NM_001321194:exon12:c.A983G:p.D328G	D	P	P	D	D	M	D	D	D	D	D	D	29.2	1.007	0.998	DDDP112558	Heyne_2018	exome	DD		simplex			male
AU207A||17_4847898_A_G	17_4847898_A_G	AU207A||17_4847898_A_G||hg19.ET-26001-3-6185-7223-7304-7380[.][99][UPT][DNT]	NDD	chr17	4847898	A	G	4847853	4847933	+	exonic.5ss	-35	0.975024	-0.273989	exonic	RNF167	.	nonsynonymous SNV	RNF167:NM_001320364:exon8:c.A611G:p.D204G,RNF167:NM_001320357:exon9:c.A716G:p.D239G,RNF167:NM_001320358:exon9:c.A716G:p.D239G,RNF167:NM_001320360:exon9:c.A716G:p.D239G,RNF167:NM_001320362:exon9:c.A611G:p.D204G,RNF167:NM_001320363:exon9:c.A611G:p.D204G,RNF167:NM_015528:exon9:c.A716G:p.D239G,RNF167:NM_001320356:exon10:c.A716G:p.D239G,RNF167:NM_001320359:exon10:c.A716G:p.D239G,RNF167:NM_001320361:ex…	D	D	D	D	D	L	T	D	T	T	D	D	26.4	1.091	0.991	AU207A	DeRubeis2014;ASC_v15_VCF	exome	autism	;AU207A		;AU207B	;AU207C	;Male
DDDP108473||15_50868116_C_A	15_50868116_C_A	DDDP108473||15_50868116_C_A||hg19.ET-54822-3-111177-113896-113947-114026[.][12]	NDD	chr15	50868116	C	A	50868066	50868116	-	exonic.3ss	0	0.979381	-0.270278	exonic	TRPM7	.	nonsynonymous SNV	TRPM7:NM_001301212:exon32:c.G4616T:p.G1539V,TRPM7:NM_017672:exon32:c.G4619T:p.G1540V	T	B	B	N	D	L	T	N	T	T	.	D	22.4	0.935	1	DDDP108473	Heyne_2018	exome	DD		simplex			female
09C99931||18_21044472_A_G	18_21044472_A_G	09C99931||18_21044472_A_G||hg19.ET-8780-3-14491-14696-14806-16310[.][36]	NDD	chr18	21044472	A	G	21044483	21044592	+	upstream	-11	0.976372	-0.264478	intronic	RIOK3	.	.	.	.	.	.	.	.	.	.	.	.	.	.	.	.	.	.	09C99931	ASC_v15_VCF	exome	autism	09C99931		09C99932	09C99933	Male
1360JS0028||22_37693679_C_T	22_37693679_C_T	1360JS0028||22_37693679_C_T||hg19.ET-27128-3-16612-18110-18229-19772[.][102][DNT]	NDD	chr22	37693679	C	T	37693605	37693723	+	exonic.5ss	-44	0.695785	-0.26202	exonic	CYTH4	.	synonymous SNV	CYTH4:NM_001318024:exon5:c.C138T:p.G46G,CYTH4:NM_013385:exon5:c.C309T:p.G103G	.	.	.	.	.	.	.	.	.	.	.	.	.	.	.	1360JS0028	DeRubeis2014;ASC_Neale2012	exome	autism	;1360JS0028		;1360JS0030	;1360JS0029	;Male
DEASD_1039_001||3_151085419_A_G	3_151085419_A_G	DEASD_1039_001||3_151085419_A_G||hg19.ET-116931-3-282104-283758-283879-284262[.][5]	NDD	chr3	151085419	A	G	151085434	151085554	+	upstream	-15	0.535825	-0.259972	intronic	MED12L;P2RY12	.	.	.	.	.	.	.	.	.	.	.	.	.	.	.	.	.	.	DEASD_1039_001	ASC_v15_VCF	exome	autism	DEASD_1039_001		DEASD_1039_500	DEASD_1039_600	Male
Lelieveld_644||14_72125153_G_A	14_72125153_G_A	Lelieveld_644||14_72125153_G_A||hg19.ET-26037-3-124185-132008-132112-134985[.][14]	NDD	chr14	72125153	G	A	72125050	72125153	+	exonic.5ss	0	0.982912	-0.250917	exonic	SIPA1L1	.	synonymous SNV	SIPA1L1:NM_001284247:exon5:c.G2097A:p.Q699Q,SIPA1L1:NM_001284245:exon6:c.G2097A:p.Q699Q,SIPA1L1:NM_001284246:exon6:c.G2097A:p.Q699Q,SIPA1L1:NM_015556:exon6:c.G2097A:p.Q699Q	.	.	.	.	.	.	.	.	.	.	.	.	.	.	.	Lelieveld_644	Lelieveld2016	exome	intellectualDisability
DDDP100168||19_3005436_T_A	19_3005436_T_A	DDDP100168||19_3005436_T_A||hg19.ET-7089-3-44915-45051-45199-48132[.][22]	NDD	chr19	3005436	T	A	3005435	3005582	-	exonic.5ss	-1	0.979199	-0.248889	exonic	TLE2	.	nonsynonymous SNV	TLE2:NM_001144762:exon15:c.A1529T:p.Q510L,TLE2:NM_001300846:exon17:c.A1898T:p.Q633L,TLE2:NM_003260:exon17:c.A1895T:p.Q632L,TLE2:NM_001144761:exon18:c.A1937T:p.Q646L	D	D	P	D	D	M	T	D	T	T	D	D	27.7	1.049	0.99	DDDP100168	Heyne_2018	exome	DD		simplex			male
AU083A||3_119631546_C_T	3_119631546_C_T	AU083A||3_119631546_C_T||hg19.ET-2932-3-181374-184607-184714-191565[.][23]	NDD	chr3	119631546	C	T	119631551	119631657	-	downstream	5	0.978688	-0.235416	intronic	GSK3B	.	.	.	.	.	.	.	.	.	.	.	.	.	.	.	.	.	.	AU083A	ASC_v15_VCF	exome	autism	AU083A		AU083B	AU083C	Male
ASC_131756||19_902139_C_T	19_902139_C_T	ASC_131756||19_902139_C_T||hg19.ET-91300-3-3139-14095-14250-14679[.][71][UPT]	NDD	chr19	902139	C	T	901976	902130	-	upstream	-9	0.925178	-0.233579	intronic	R3HDM4	.	.	.	.	.	.	.	.	.	.	.	.	.	.	.	.	.	.	ASC_131756	ASC_v15_VCF	exome	autism	ASC_131756		ASC_131757	ASC_131758	Male
G01-GEA-233-HI||12_48882726_A_T	12_48882726_A_T	G01-GEA-233-HI||12_48882726_A_T||hg19.ET-121273-3-7224-9421-9454-11309[.][9]	NDD	chr12	48882726	A	T	48882707	48882739	+	exonic.5ss	-13	0.990074	-0.227845	exonic	C12orf54	.	nonsynonymous SNV	C12orf54:NM_152319:exon5:c.A155T:p.D52V	D	P	B	N	N	L	T	D	T	T	T	N	23.2	0.224	0.945	G01-GEA-233-HI	ASC_v15_VCF	exome	autism	G01-GEA-233-HI		G01-GEA-233-PA	G01-GEA-233-MA	Male
DDDP111678||8_42729097_G_T	8_42729097_G_T	DDDP111678||8_42729097_G_T||hg19.ET-81790-3-11996-25717-25793-29611[.][47][UPT][DNT]	NDD	chr8	42729097	G	T	42729074	42729149	-	exonic.5ss	-23	0.923016	-0.22652	exonic	RNF170	.	synonymous SNV	RNF170:NM_001160223:exon3:c.C190A:p.R64R,RNF170:NM_001160224:exon3:c.C190A:p.R64R,RNF170:NM_030954:exon3:c.C190A:p.R64R	.	.	.	.	.	.	.	.	.	.	.	.	.	.	.	DDDP111678	Heyne_2018	exome	DD		simplex			female
DDDP107640||20_5935260_G_A	20_5935260_G_A	DDDP107640||20_5935260_G_A||hg19.ET-84515-3-4877-6956-7039-7450[.][32]	NDD	chr20	5935260	G	A	5935254	5935336	+	exonic.3ss	6	0.985666	-0.225297	exonic	MCM8	.	nonsynonymous SNV	MCM8:NM_001281520:exon4:c.G260A:p.S87N,MCM8:NM_001281521:exon4:c.G260A:p.S87N,MCM8:NM_001281522:exon4:c.G260A:p.S87N,MCM8:NM_032485:exon4:c.G260A:p.S87N,MCM8:NM_182802:exon4:c.G260A:p.S87N	T	B	B	D	N	M	T	N	T	T	T	D	15.33	1.048	0.86	DDDP107640	Heyne_2018	exome	DD		simplex			female
DDDP112080||8_38002765_G_C	8_38002765_G_C	DDDP112080||8_38002765_G_C||hg19.ET-6770-3-8120-8767-8861-9696[.][51][UPT][DNT]	NDD	chr8	38002765	G	C	38002740	38002833	-	exonic.5ss	-25	0.673852	-0.223343	exonic	STAR	.	nonsynonymous SNV	STAR:NM_000349:exon6:c.C719G:p.T240R	D	D	D	D	D	M	D	D	D	D	D	D	26.7	0.949	0.788	DDDP112080	Heyne_2018	exome	DD		simplex			male
25150.p1||2_187365011_A_G	2_187365011_A_G	25150.p1||2_187365011_A_G||hg19.ET-55854-3-12177-17024-17136-18115[.][312][UPT][DNT]	NDD	chr2	187365011	A	G	187364909	187365020	+	exonic.5ss	-9	0.98219	-0.222037	exonic	ZC3H15	.	nonsynonymous SNV	ZC3H15:NM_018471:exon3:c.A280G:p.I94V	T	B	B	D	D	N	T	N	T	T	T	D	8.4	1.199	1	25150.p1	Willsey2017	exome	tourette_syndrome
3207-1||1_113209767_G_A	1_113209767_G_A	3207-1||1_113209767_G_A||hg19.ET-829-3-43327-50621-50693-53090[.][108][UPT][DNT]	NDD	chr1	113209767	G	A	113209696	113209767	+	exonic.5ss	0	0.980696	-0.221776	exonic	CAPZA1	.	synonymous SNV	CAPZA1:NM_006135:exon8:c.G657A:p.S219S	.	.	.	.	.	.	.	.	.	.	.	.	.	.	.	3207-1	Fromer2014	exome	schizophrenia
07C66440||17_60657466_C_G	17_60657466_C_G	07C66440||17_60657466_C_G||hg19.ET-11011-3-102550-104086-104168-110110[.][23]	NDD	chr17	60657466	C	G	60657472	60657553	+	upstream	-6	0.981309	-0.221673	intronic	TLK2	.	.	.	.	.	.	.	.	.	.	.	.	.	.	.	.	.	.	07C66440	ASC_v15_VCF	exome	autism	07C66440		07C66441	07C66442	Male
10C105660||15_73862669_G_A	15_73862669_G_A	10C105660||15_73862669_G_A||hg19.ET-27020-3-62751-65989-66263-73155[.][43][UPT]	NDD	chr15	73862669	G	A	73862491	73862764	-	exonic.3ss	95	0.98197	-0.218893	exonic	NPTN	.	synonymous SNV	NPTN:NM_001161364:exon5:c.C588T:p.G196G,NPTN:NM_017455:exon5:c.C588T:p.G196G,NPTN:NM_001161363:exon6:c.C936T:p.G312G,NPTN:NM_012428:exon6:c.C936T:p.G312G	.	.	.	.	.	.	.	.	.	.	.	.	.	.	.	10C105660	ASC_v15_VCF	exome	autism	10C105660		10C106790	10C105659	Female
DDDP110717||19_8587280_G_T	19_8587280_G_T	DDDP110717||19_8587280_G_T||hg19.ET-4542-3-57814-57901-58071-58843[.][15][DNT]	NDD	chr19	8587280	G	T	8587261	8587430	-	exonic.5ss	-19	0.94645	-0.214147	exonic	MYO1F	.	synonymous SNV	MYO1F:NM_001348355:exon27:c.C3189A:p.V1063V,MYO1F:NM_012335:exon27:c.C3201A:p.V1067V	.	.	.	.	.	.	.	.	.	.	.	.	.	.	.	DDDP110717	Heyne_2018	exome	DD		simplex			male
13177.p1||3_49736189_C_G	3_49736189_C_G	13177.p1||3_49736189_C_G||hg19.ET-63891-3-12010-12238-12306-12463[.][21][DNT]	NDD	chr3	49736189	C	G	49736188	49736255	+	exonic.3ss	1	0.979943	-0.213066	exonic	RNF123	.	nonsynonymous SNV	RNF123:NM_022064:exon9:c.C572G:p.A191G	T	B	B	N	D	L	T	N	T	T	D	D	23.8	0.852	0.892	13177.p1	ASC_v15_VCF	exome	autism	13177		4959	4991	Female
08C76402||3_194174513_A_G	3_194174513_A_G	08C76402||3_194174513_A_G||hg19.ET-79572-3-16982-17461-17534-20963[.][2]	NDD	chr3	194174513	A	G	194174435	194174507	-	upstream	-6	0.970603	-0.20683	intronic	ATP13A3	.	.	.	.	.	.	.	.	.	.	.	.	.	.	.	.	.	.	08C76402	ASC_v15_VCF	exome	autism	08C76402		08C76565	08C76564	Male
Fam_83474||9_140058120_G_A	9_140058120_G_A	Fam_83474||9_140058120_G_A||hg19.ET-2902-3-27174-27402-27512-27602[.][19][UPT][DNT]	NDD	chr9	140058120	G	A	140058011	140058120	+	exonic.5ss	0	0.978406	-0.206546	exonic	GRIN1	.	nonsynonymous SNV	GRIN1:NM_000832:exon17:c.G2443A:p.G815R,GRIN1:NM_007327:exon17:c.G2443A:p.G815R,GRIN1:NM_021569:exon17:c.G2443A:p.G815R,GRIN1:NM_001185090:exon18:c.G2506A:p.G836R,GRIN1:NM_001185091:exon18:c.G2506A:p.G836R	D	D	D	D	D	H	T	D	D	D	.	D	28.3	1.045	0.894	Fam_83474	Heyne_2018	exome	E_NDD		simplex			male
65|Lelieveld_65||9_8507301_C_T	9_8507301_C_T	65|Lelieveld_65||9_8507301_C_T||hg19.ET-5789-3-2097876-2108289-2108423-2111318[.][15]	NDD	chr9	8507301	C	T	8507301	8507434	-	exonic.5ss	0	0.980667	-0.206021	exonic	PTPRD	.	synonymous SNV	PTPRD:NM_001171025:exon9:c.G1647A:p.E549E,PTPRD:NM_001040712:exon10:c.G1668A:p.E556E,PTPRD:NM_130393:exon10:c.G1659A:p.E553E,PTPRD:NM_130391:exon11:c.G1677A:p.E559E,PTPRD:NM_130392:exon11:c.G1677A:p.E559E,PTPRD:NM_002839:exon22:c.G1677A:p.E559E	.	.	.	.	.	.	.	.	.	.	.	.	.	.	.	65|Lelieveld_65	Lelieveld2016	exome	intellectualDisability
ASC_CA_137_A||4_90749294_C_T	4_90749294_C_T	ASC_CA_137_A||4_90749294_C_T||hg19.ET-6622-3-5750-13112-13154-18908[.][134][UPT][DNT]	NDD	chr4	90749294	C	T	90749294	90749335	-	exonic.5ss	0	0.97268	-0.201752	exonic	SNCA	.	nonsynonymous SNV	SNCA:NM_000345:exon3:c.G163A:p.V55M,SNCA:NM_001146054:exon3:c.G163A:p.V55M,SNCA:NM_001146055:exon3:c.G163A:p.V55M,SNCA:NM_007308:exon3:c.G163A:p.V55M	D	P	B	D	D	M	D	D	D	D	D	D	23.3	0.935	0.997	ASC_CA_137_A	ASC_v15_VCF	exome	autism	ASC_CA_137_A		ASC_CA_137_P	ASC_CA_137_M	Male
DDDP111691||6_33406340_G_C	6_33406340_G_C	DDDP111691||6_33406340_G_C||hg19.ET-8831-3-21222-21349-21494-21705[.][7][DNT]	NDD	chr6	33406340	G	C	33406196	33406340	+	exonic.5ss	0	0.977063	-0.201734	exonic	SYNGAP1	.	nonsynonymous SNV	SYNGAP1:NM_001130066:exon9:c.G1531C:p.G511R,SYNGAP1:NM_006772:exon9:c.G1531C:p.G511R	D	D	D	D	D	M	T	D	T	T	.	D	25.2	0.953	0.998	DDDP111691	Heyne_2018	exome	DD		simplex			female
09C81416||13_77760058_G_C	13_77760058_G_C	09C81416||13_77760058_G_C||hg19.ET-23077-3-141092-143979-144172-144665[.][2]	NDD	chr13	77760058	G	C	77760006	77760198	-	exonic.5ss	-52	0.973972	-0.200109	exonic	MYCBP2	.	synonymous SNV	MYCBP2:NM_015057:exon31:c.C4392G:p.T1464T	.	.	.	.	.	.	.	.	.	.	.	.	.	.	.	09C81416	DeRubeis2014	exome	autism
11122.p1||15_57526214_T_A	15_57526214_T_A	11122.p1||15_57526214_T_A||hg19.ET-6938-3-317222-318408-318473-327837[.][50][UPT][DNT]	NDD	chr15	57526214	T	A	57526241	57526305	+	upstream	-27	0.975061	-0.200083	intronic	TCF12	.	.	.	.	.	.	.	.	.	.	.	.	.	.	.	.	.	.	11122.p1	Iossifov;ASC_v15_VCF	exome	autism	;11122		;SSC02754	;SSC02739	;Female
795||18_13038415_C_G	18_13038415_C_G	795||18_13038415_C_G||hg19.ET-55125-3-48940-50008-50218-52468[.][3]	NDD	chr18	13038415	C	G	13038369	13038578	+	exonic.3ss	46	0.59292	-0.199599	exonic	CEP192	.	nonsynonymous SNV	CEP192:NM_032142:exon13:c.C1646G:p.T549R	D	B	B	.	N	.	T	N	T	T	T	N	19.69	-0.42	0.022	795	Heyne_2018	exome	ID		simplex			female
Lelieveld_795||18_13038415_C_G	18_13038415_C_G	Lelieveld_795||18_13038415_C_G||hg19.ET-55125-3-48940-50008-50218-52468[.][3]	NDD	chr18	13038415	C	G	13038369	13038578	+	exonic.3ss	46	0.59292	-0.199599	exonic	CEP192	.	nonsynonymous SNV	CEP192:NM_032142:exon13:c.C1646G:p.T549R	D	B	B	.	N	.	T	N	T	T	T	N	19.69	-0.42	0.022	Lelieveld_795	Lelieveld2016	exome	intellectualDisability
NDAR_INVUD365NYJ_wes1||3_11068045_G_A	3_11068045_G_A	NDAR_INVUD365NYJ_wes1||3_11068045_G_A||hg19.ET-6529-3-36143-36501-36626-39001[.][9][UPT]	NDD	chr3	11068045	G	A	11067921	11068045	+	exonic.5ss	0	0.978269	-0.199581	exonic	SLC6A1	.	nonsynonymous SNV	SLC6A1:NM_001348252:exon9:c.G544A:p.G182S,SLC6A1:NM_001348253:exon9:c.G544A:p.G182S,SLC6A1:NM_001348250:exon10:c.G1078A:p.G360S,SLC6A1:NM_001348251:exon10:c.G718A:p.G240S,SLC6A1:NM_003042:exon10:c.G1078A:p.G360S	D	D	D	D	D	H	D	D	D	D	.	D	32	1.048	0.958	NDAR_INVUD365NYJ_wes1	DeRubeis2014;De_Rubeis_Nature_2014	exome	autism	;NDAR_INVUD365NYJ_wes1		;NDAR_INVJG801CNK_wes1	;NDAR_INVTZ328KK5_wes1	;Female
346-09-111764||11_1464633_G_C	11_1464633_G_C	346-09-111764||11_1464633_G_C||hg19.ET-9024-3-56241-56436-56505-56590[.][35]	NDD	chr11	1464633	G	C	1464565	1464633	+	exonic.5ss	0	0.975961	-0.197936	exonic	BRSK2	.	synonymous SNV	BRSK2:NM_001256627:exon7:c.G633C:p.V211V,BRSK2:NM_001256629:exon7:c.G633C:p.V211V,BRSK2:NM_001256630:exon7:c.G771C:p.V257V,BRSK2:NM_001282218:exon7:c.G453C:p.V151V,BRSK2:NM_003957:exon7:c.G633C:p.V211V	.	.	.	.	.	.	.	.	.	.	.	.	.	.	.	346-09-111764	ASC_v15_VCF	exome	autism	346-09-111764		348-09-111766	347-09-111765	Male
1021012||6_107031198_C_T	6_107031198_C_T	1021012||6_107031198_C_T||hg19.ET-84816-3-44820-49078-49171-60395[.][19][DNT]	NDD	chr6	107031198	C	T	107031203	107031295	-	downstream	5	0.982374	-0.197774	intronic	RTN4IP1	.	.	.	.	.	.	.	.	.	.	.	.	.	.	.	.	.	.	1021012	ASC_v15_VCF	exome	autism	1021012		1038011	1059001	Male
05C50077||14_92537279_C_G	14_92537279_C_G	05C50077||14_92537279_C_G||hg19.ET-4287-3-28657-38568-38687-45207[.][22][DNT]	NDD	chr14	92537279	C	G	92537279	92537397	-	exonic.5ss	0	0.94506	-0.196297	exonic	ATXN3	.	nonsynonymous SNV	ATXN3:NM_001164779:exon6:c.G628C:p.G210R,ATXN3:NM_001164780:exon7:c.G454C:p.G152R,ATXN3:NM_001127697:exon8:c.G838C:p.G280R,ATXN3:NM_001164781:exon8:c.G781C:p.G261R,ATXN3:NM_001127696:exon9:c.G946C:p.G316R,ATXN3:NM_030660:exon9:c.G826C:p.G276R,ATXN3:NM_004993:exon10:c.G991C:p.G331R	D	D	P	N	D	.	T	N	T	T	T	D	23.3	0.739	0.014	05C50077	ASC_v15_VCF	exome	autism	05C50077		05C50080	05C50079	Female
DDDP109128||22_41562653_A_G	22_41562653_A_G	DDDP109128||22_41562653_A_G||hg19.ET-2033-3-74521-76989-77057-78839[.][14]	NDD	chr22	41562653	A	G	41562603	41562670	+	exonic.5ss	-17	0.979307	-0.195219	exonic	EP300	.	nonsynonymous SNV	EP300:NM_001429:exon23:c.A3857G:p.N1286S	D	D	D	D	D	M	D	D	D	D	D	D	26.8	1.14	1	DDDP109128	Heyne_2018	exome	DD		simplex			female
13535.p1||12_53553919_G_A	12_53553919_G_A	13535.p1||12_53553919_G_A||hg19.ET-51380-3-23147-23590-23790-23971[.][18]	NDD	chr12	53553919	G	A	53553904	53554103	-	exonic.5ss	-15	0.972667	-0.194716	exonic	CSAD	.	nonsynonymous SNV	CSAD:NM_001244706:exon5:c.C452T:p.A151V,CSAD:NM_001244705:exon14:c.C1151T:p.A384V,CSAD:NM_015989:exon14:c.C1232T:p.A411V	T	D	P	D	D	L	T	N	T	T	T	D	24	1.048	0.841	13535.p1	Iossifov;Heyne_2018;ASC_v15_VCF	exome	autism;ASD	;13535	;simplex	;SSC07681	;SSC07705	;male;Male
ASC_CA_129_A||17_35634022_A_T	17_35634022_A_T	ASC_CA_129_A||17_35634022_A_T||hg19.ET-31-3-135114-135895-135977-136960[.][16]	NDD	chr17	35634022	A	T	35633926	35634007	-	upstream	-15	0.978221	-0.192347	intronic	ACACA	.	.	.	.	.	.	.	.	.	.	.	.	.	.	.	.	.	.	ASC_CA_129_A	ASC_v15_VCF	exome	autism	ASC_CA_129_A		ASC_CA_129_P	ASC_CA_129_M	Male
DDDP111242||8_8865658_G_A	8_8865658_G_A	DDDP111242||8_8865658_G_A||hg19.ET-90459-3-3368-8166-8345-11738[.][51][UPT]	NDD	chr8	8865658	G	A	8865480	8865658	+	exonic.5ss	0	0.979615	-0.191973	exonic	ERI1	.	nonsynonymous SNV	ERI1:NM_153332:exon2:c.G287A:p.R96K	T	B	B	D	D	M	T	N	T	T	.	D	22.3	0.953	1	DDDP111242	Heyne_2018	exome	DD		simplex			female
DDDP103957||1_222846717_T_C	1_222846717_T_C	DDDP103957||1_222846717_T_C||hg19.ET-64853-3-39427-42087-42210-45272[.][84][UPT][DNT]	NDD	chr1	222846717	T	C	222846655	222846777	-	exonic.3ss	60	0.976712	-0.191832	exonic	AIDA	.	nonsynonymous SNV	AIDA:NM_022831:exon8:c.A644G:p.D215G	T	D	D	D	D	L	.	N	T	T	T	D	22.7	1.061	1	DDDP103957	Heyne_2018	exome	DD		simplex			female
4257-1||11_76831955_G_A	11_76831955_G_A	4257-1||11_76831955_G_A||hg19.ET-726-3-55207-56767-56964-57988[.][13][DNT]	NDD	chr11	76831955	G	A	76831759	76831955	+	exonic.5ss	0	0.971986	-0.191467	exonic	CAPN5	.	nonsynonymous SNV	CAPN5:NM_004055:exon10:c.G1487A:p.R496Q	T	B	B	N	D	L	T	N	T	T	.	D	22	0.067	0.85	4257-1	Fromer2014	exome	schizophrenia
40||6_35427537_G_A	6_35427537_G_A	40||6_35427537_G_A||hg19.ET-2178-3-10094-10321-10400-11191[.][11][DNT]	NDD	chr6	35427537	G	A	35427459	35427537	+	exonic.5ss	0	0.981367	-0.190288	exonic	FANCE	.	nonsynonymous SNV	FANCE:NM_021922:exon7:c.G1316A:p.G439E	T	P	B	N	D	L	T	N	T	T	.	D	17.24	0.953	0.883	40	Heyne_2018	exome	ID		simplex			male
Lelieveld_40||6_35427537_G_A	6_35427537_G_A	Lelieveld_40||6_35427537_G_A||hg19.ET-2178-3-10094-10321-10400-11191[.][11][DNT]	NDD	chr6	35427537	G	A	35427459	35427537	+	exonic.5ss	0	0.981367	-0.190288	exonic	FANCE	.	nonsynonymous SNV	FANCE:NM_021922:exon7:c.G1316A:p.G439E	T	P	B	N	D	L	T	N	T	T	.	D	17.24	0.953	0.883	Lelieveld_40	Lelieveld2016	exome	intellectualDisability
EGAN00001101026||19_54967119_T_G	19_54967119_T_G	EGAN00001101026||19_54967119_T_G||hg19.ET-114823-3-9682-10081-10360-10439[.][6]	NDD	chr19	54967119	T	G	54967146	54967424	+	upstream	-27	0.965012	-0.18714	intronic	LENG8	.	.	.	.	.	.	.	.	.	.	.	.	.	.	.	.	.	.	EGAN00001101026	ASC_v15_VCF	exome	autism	EGAN00001101026		EGAN00001101302	EGAN00001101378	Male
DEASD_0397_001||1_109315441_G_A	1_109315441_G_A	DEASD_0397_001||1_109315441_G_A||hg19.ET-6814-3-16423-29002-29157-32670[.][36]	NDD	chr1	109315441	G	A	109315287	109315441	+	exonic.5ss	0	0.982154	-0.182805	exonic	STXBP3	.	nonsynonymous SNV	STXBP3:NM_007269:exon7:c.G593A:p.S198N	T	P	P	D	D	N	T	N	T	T	.	D	15.92	1.048	0.946	DEASD_0397_001	DeRubeis2014;ASC_v15_VCF	exome	autism	;DEASD_0397_001		;DEASD_0397_500	;DEASD_0397_600	;Male
08C78024||X_135291601_G_A	X_135291601_G_A	08C78024||X_135291601_G_A||hg19.ET-2273-3-64940-65541-65741-66169[.][5][UPT][DNT]	NDD	chrX	135291601	G	A	135291402	135291601	+	exonic.5ss	0	0.481622	-0.182143	exonic	FHL1	.	synonymous SNV	FHL1:NM_001159702:exon7:c.G888A:p.P296P	.	.	.	.	.	.	.	.	.	.	.	.	.	.	.	08C78024	ASC_v15_VCF	exome	autism	08C78024		08C78023	08C78022	Male
13890.p1||17_4905942_G_A	17_4905942_G_A	13890.p1||17_4905942_G_A||hg19.ET-10749-3-7177-7516-7695-7783[.][19]	NDD	chr17	4905942	G	A	4905759	4905937	+	downstream	5	0.981151	-0.18162	intronic	KIF1C	.	.	.	.	.	.	.	.	.	.	.	.	.	.	.	.	.	.	13890.p1	Iossifov;ASC_v15_VCF	exome	autism	;13890		;6762	;6207	;Female
DDDP100168||12_69983431_C_G	12_69983431_C_G	DDDP100168||12_69983431_C_G||hg19.ET-10576-3-5835-7057-7260-9631[.][196][UPT][DNT]	NDD	chr12	69983431	C	G	69983265	69983467	+	exonic.5ss	-36	0.976418	-0.18091	exonic	CCT2	.	nonsynonymous SNV	CCT2:NM_001198842:exon7:c.C472G:p.L158V,CCT2:NM_006431:exon7:c.C613G:p.L205V	T	B	B	D	D	N	T	N	T	T	D	D	14.07	0.935	1	DDDP100168	Heyne_2018	exome	DD		simplex			male
EGAN00001100925||11_116719925_C_T	11_116719925_C_T	EGAN00001100925||11_116719925_C_T||hg19.ET-23387-3-243468-251994-252158-253669[.][22]	NDD	chr11	116719925	C	T	116719836	116719999	-	exonic.3ss	74	0.972713	-0.178092	exonic	SIK3	.	nonsynonymous SNV	SIK3:NM_001281749:exon21:c.G3406A:p.G1136R,SIK3:NM_025164:exon21:c.G3586A:p.G1196R,SIK3:NM_001281748:exon22:c.G2929A:p.G977R	D	D	P	U	D	L	T	D	T	T	D	D	31	0.935	0.588	EGAN00001100925	ASC_v15_VCF	exome	autism	EGAN00001100925		EGAN00001101186	EGAN00001101007	Male
11414.p1||7_77006604_T_G	7_77006604_T_G	11414.p1||7_77006604_T_G||hg19.ET-54103-3-38096-42010-42115-42493[.][5]	NDD	chr7	77006604	T	G	77006603	77006707	-	exonic.5ss	-1	0.979675	-0.174791	exonic	GSAP	.	nonsynonymous SNV	GSAP:NM_001350900:exon7:c.A35C:p.K12T,GSAP:NM_001350901:exon7:c.A35C:p.K12T,GSAP:NM_001350898:exon8:c.A623C:p.K208T,GSAP:NM_001350896:exon9:c.A680C:p.K227T,GSAP:NM_001350897:exon9:c.A680C:p.K227T,GSAP:NM_001350899:exon9:c.A680C:p.K227T,GSAP:NM_017439:exon9:c.A680C:p.K227T	D	P	P	U	D	M	T	D	T	T	T	D	23.8	0.894	0.997	11414.p1	Iossifov;ASC_v15_VCF	exome	autism	;11414		;4956	;4988	;Female
DDDP115570||20_47693596_C_G	20_47693596_C_G	DDDP115570||20_47693596_C_G||hg19.ET-1434-3-32275-33734-33819-35315[.][86][UPT][DNT]	NDD	chr20	47693596	C	G	47693517	47693601	+	exonic.5ss	-5	0.982099	-0.174481	exonic	CSE1L	.	nonsynonymous SNV	CSE1L:NM_001256135:exon12:c.C1247G:p.A416G,CSE1L:NM_001316:exon13:c.C1415G:p.A472G	D	B	B	D	D	N	T	N	T	T	T	D	22.1	0.02	0.998	DDDP115570	Heyne_2018	exome	DD		simplex			male
DDDP118575||1_212550930_G_A	1_212550930_G_A	DDDP118575||1_212550930_G_A||hg19.ET-55248-3-38031-40219-40364-42625[.][13]	NDD	chr1	212550930	G	A	212550904	212551048	-	exonic.5ss	-26	0.954521	-0.173676	exonic	TMEM206	.	nonsynonymous SNV	TMEM206:NM_018252:exon6:c.C757T:p.R253W,TMEM206:NM_001198862:exon7:c.C940T:p.R314W	D	D	D	D	D	L	.	D	T	T	T	D	34	1.048	0.997	DDDP118575	Heyne_2018	exome	DD		simplex			male
DEASD_0049_001||3_72891569_G_C	3_72891569_G_C	DEASD_0049_001||3_72891569_G_C||hg19.ET-55164-3-7089-9045-9168-10248[.][98][DNT]	NDD	chr3	72891569	G	C	72891431	72891553	-	upstream	-16	0.97568	-0.172141	intronic	SHQ1	.	.	.	.	.	.	.	.	.	.	.	.	.	.	.	.	.	.	DEASD_0049_001	ASC_v15_VCF	exome	autism	DEASD_0049_001		DEASD_0049_500	DEASD_0049_600	Male
AC02-1234-01||5_139202285_T_C	5_139202285_T_C	AC02-1234-01||5_139202285_T_C||hg19.ET-84249-3-29185-29905-29964-40881[.][4]	NDD	chr5	139202285	T	C	139202311	139202369	+	upstream	-26	0.885169	-0.171404	intronic	PSD2	.	.	.	.	.	.	.	.	.	.	.	.	.	.	.	.	.	.	AC02-1234-01	ASC_v15_VCF	exome	autism	AC02-1234-01		AC02-1234-02	AC02-1234-03	Male
14045.p1||7_72966593_A_C	7_72966593_A_C	14045.p1||7_72966593_A_C||hg19.ET-9275-3-3249-8493-8569-17091[.][56][UPT]	NDD	chr7	72966593	A	C	72966497	72966572	-	upstream	-21	0.979406	-0.171302	intronic	BCL7B	.	.	.	.	.	.	.	.	.	.	.	.	.	.	.	.	.	.	14045.p1	Iossifov	exome	autism
14668.p1||6_99887716_G_A	6_99887716_G_A	14668.p1||6_99887716_G_A||hg19.ET-85015-3-74812-78521-78608-80977[.][9]	NDD	chr6	99887716	G	A	99887645	99887731	-	exonic.3ss	15	0.984086	-0.171178	exonic	USP45	.	nonsynonymous SNV	USP45:NM_001346024:exon14:c.C1915T:p.R639C,USP45:NM_001346025:exon14:c.C1912T:p.R638C,USP45:NM_001346028:exon15:c.C1009T:p.R337C,USP45:NM_001080481:exon16:c.C2089T:p.R697C,USP45:NM_001346021:exon16:c.C2089T:p.R697C,USP45:NM_001346022:exon16:c.C2089T:p.R697C,USP45:NM_001346023:exon16:c.C2086T:p.R696C,USP45:NM_001346026:exon16:c.C2089T:p.R697C,USP45:NM_001346027:exon16:c.C1009T:p.R337C,USP45:NM_001…	T	D	D	N	D	M	T	D	T	T	D	D	28.3	0.953	1	14668.p1	Krumm;ASC_v15_VCF	exome	autism	;14668		;37333	;37335	;Male
11074.p1||20_60485668_G_A	20_60485668_G_A	11074.p1||20_60485668_G_A||hg19.ET-1002-3-645622-660996-661182-674027[.][13][DNT]	NDD	chr20	60485668	G	A	60485478	60485663	+	downstream	5	0.974769	-0.166963	intronic	CDH4	.	.	.	.	.	.	.	.	.	.	.	.	.	.	.	.	.	.	11074.p1	Krumm	exome	autism
deLigt68||13_52536008_G_A	13_52536008_G_A	deLigt68||13_52536008_G_A||hg19.ET-540-3-49623-52581-52658-54172[.][11]	NDD	chr13	52536008	G	A	52535973	52536049	-	exonic.5ss	-35	0.683966	-0.164232	exonic	ATP7B	.	synonymous SNV	ATP7B:NM_000053:exon6:c.C1911T:p.N637N,ATP7B:NM_001330578:exon6:c.C1911T:p.N637N,ATP7B:NM_001243182:exon7:c.C1578T:p.N526N	.	.	.	.	.	.	.	.	.	.	.	.	.	.	.	deLigt68	deLigt2012	exome	intellectualDisability
DDDP111495||3_154024084_C_A	3_154024084_C_A	DDDP111495||3_154024084_C_A||hg19.ET-170506-3-17845-21202-21282-22329[.][41][UPT]	NDD	chr3	154024084	C	A	154024005	154024084	-	exonic.3ss	0	0.98428	-0.164018	exonic	DHX36	.	nonsynonymous SNV	DHX36:NM_001114397:exon6:c.G814T:p.V272F,DHX36:NM_020865:exon6:c.G814T:p.V272F	D	P	P	D	D	H	T	D	T	T	.	D	33	0.892	0.99	DDDP111495	Heyne_2018	exome	DD		simplex			female
ASC_142560||14_32586498_G_A	14_32586498_G_A	ASC_142560||14_32586498_G_A||hg19.ET-394-3-20098-42851-42999-71974[.][10][DNT]	NDD	chr14	32586498	G	A	32586346	32586493	+	downstream	5	0.845014	-0.163946	intronic	ARHGAP5	.	.	.	.	.	.	.	.	.	.	.	.	.	.	.	.	.	.	ASC_142560	ASC_v15_VCF	exome	autism	ASC_142560		ASC_142561	ASC_142562	Male
DDDP111236||7_158698761_G_A	7_158698761_G_A	DDDP111236||7_158698761_G_A||hg19.ET-55112-3-49018-52411-52514-57972[.][9]	NDD	chr7	158698761	G	A	158698680	158698782	+	exonic.5ss	-21	0.953996	-0.163649	exonic	WDR60	.	nonsynonymous SNV	WDR60:NM_001350915:exon10:c.G866A:p.R289Q,WDR60:NM_001350914:exon11:c.G1301A:p.R434Q,WDR60:NM_018051:exon11:c.G1439A:p.R480Q,WDR60:NM_001350917:exon12:c.G191A:p.R64Q,WDR60:NM_001350918:exon13:c.G191A:p.R64Q	T	P	B	N	D	L	T	N	T	T	T	D	26.9	1.047	0.999	DDDP111236	Heyne_2018	exome	DD		simplex			female
DDDP120226||8_103357726_T_C	8_103357726_T_C	DDDP120226||8_103357726_T_C||hg19.ET-51366-3-69454-70144-70294-73005[.][7]	NDD	chr8	103357726	T	C	103357624	103357773	-	exonic.3ss	47	0.978616	-0.163205	exonic	UBR5	.	nonsynonymous SNV	UBR5:NM_001282873:exon8:c.A784G:p.S262G,UBR5:NM_015902:exon8:c.A784G:p.S262G	D	P	P	D	D	M	T	D	T	T	D	D	26.1	1.061	1	DDDP120226	Heyne_2018	exome	DD		simplex			male
DDDP120061||16_67165195_G_A	16_67165195_G_A	DDDP120061||16_67165195_G_A||hg19.ET-80262-3-19031-24274-24318-25434[.][25]	NDD	chr16	67165195	G	A	67165189	67165232	+	exonic.3ss	6	0.957404	-0.163026	exonic	C16orf70	.	nonsynonymous SNV	C16orf70:NM_001320543:exon4:c.G154A:p.E52K,C16orf70:NM_025187:exon4:c.G238A:p.E80K,C16orf70:NM_001320540:exon5:c.G238A:p.E80K,C16orf70:NM_001320541:exon5:c.G238A:p.E80K,C16orf70:NM_001320542:exon5:c.G238A:p.E80K	D	D	D	D	D	M	.	D	D	D	D	D	34	0.949	0.987	DDDP120061	Heyne_2018	exome	DD		simplex			female
hu||22_50755723_T_C	22_50755723_T_C	hu||22_50755723_T_C||hg19.ET-414918-3-12153-12687-12768-13585[.][32][UPT]	NDD	chr22	50755723	T	C	50755722	50755802	-	exonic.5ss	-1	0.96581	-0.162961	exonic	DENND6B	.	nonsynonymous SNV	DENND6B:NM_001001794:exon5:c.A452G:p.K151R	D	D	D	D	D	M	T	D	T	T	D	D	24.6	0.913	0.981	hu	Heyne_2018	exome	EE		simplex			male
DDDP117419||19_10655459_G_C	19_10655459_G_C	DDDP117419||19_10655459_G_C||hg19.ET-84971-3-3355-3812-3896-3986[.][35][UPT][DNT]	NDD	chr19	10655459	G	C	10655459	10655542	+	exonic.3ss	0	0.718286	-0.162186	exonic	ATG4D	.	nonsynonymous SNV	ATG4D:NM_001281504:exon2:c.G47C:p.G16A,ATG4D:NM_032885:exon2:c.G236C:p.G79A	D	D	D	U	D	M	T	D	T	T	D	D	27.5	0.939	0.998	DDDP117419	Heyne_2018	exome	DD		simplex			male
4_de_Ligt||5_14390384_A_T	5_14390384_A_T	4_de_Ligt||5_14390384_A_T||hg19.ET-7204-3-248679-249511-249581-250181[.][13][UPT][DNT]	NDD	chr5	14390384	A	T	14390340	14390409	+	exonic.5ss	-25	0.97627	-0.160669	exonic	TRIO	.	nonsynonymous SNV	TRIO:NM_007118:exon26:c.A4103T:p.D1368V	D	D	P	D	D	M	T	D	T	T	D	D	28	1.199	0.991	4_de_Ligt	Heyne_2018	exome	ID		simplex			male
deLigt4||5_14390384_A_T	5_14390384_A_T	deLigt4||5_14390384_A_T||hg19.ET-7204-3-248679-249511-249581-250181[.][13][UPT][DNT]	NDD	chr5	14390384	A	T	14390340	14390409	+	exonic.5ss	-25	0.97627	-0.160669	exonic	TRIO	.	nonsynonymous SNV	TRIO:NM_007118:exon26:c.A4103T:p.D1368V	D	D	P	D	D	M	T	D	T	T	D	D	28	1.199	0.991	deLigt4	deLigt2012	exome	intellectualDisability
131-09-111090||1_203668845_G_A	1_203668845_G_A	131-09-111090||1_203668845_G_A||hg19.ET-493-3-74568-75673-75931-76419[.][15][UPT]	NDD	chr1	203668845	G	A	203668588	203668845	+	exonic.5ss	0	0.97616	-0.159777	exonic	ATP2B4	.	nonsynonymous SNV	ATP2B4:NM_001001396:exon4:c.G649A:p.G217S,ATP2B4:NM_001684:exon4:c.G649A:p.G217S	D	D	D	D	D	H	D	D	D	D	.	D	34	0.953	0.998	131-09-111090	ASC_v15_VCF	exome	autism	131-09-111090		133-09-111092	132-09-111091	Male
127-09-111080||19_38991635_G_A	19_38991635_G_A	127-09-111080||19_38991635_G_A||hg19.ET-6261-3-70027-70121-70291-71807[.][5]	NDD	chr19	38991635	G	A	38991461	38991630	+	downstream	5	0.98316	-0.158866	intronic	RYR1	.	.	.	.	.	.	.	.	.	.	.	.	.	.	.	.	.	.	127-09-111080	ASC_v15_VCF	exome	autism	127-09-111080		129-09-111082	128-09-111081	Male
DDDP112525||2_29436850_C_T	2_29436850_C_T	DDDP112525||2_29436850_C_T||hg19.ET-238-3-703906-710530-710628-714733[.][11][UPT]	NDD	chr2	29436850	C	T	29436850	29436947	-	exonic.5ss	0	0.985761	-0.158738	exonic	ALK	.	nonsynonymous SNV	ALK:NM_004304:exon24:c.G3743A:p.R1248Q	D	D	D	D	D	M	D	D	D	D	D	D	35	0.935	1	DDDP112525	Heyne_2018	exome	DD		simplex			male
14151.p1||9_33798080_G_A	9_33798080_G_A	14151.p1||9_33798080_G_A||hg19.ET-5646-3-49337-50363-50617-51020[.][83][UPT]	NDD	chr9	33798080	G	A	33797827	33798080	+	exonic.5ss	0	0.970524	-0.154683	exonic	PRSS3	.	nonsynonymous SNV	PRSS3:NM_001197098:exon3:c.G433A:p.A145T,PRSS3:NM_002771:exon3:c.G454A:p.A152T,PRSS3:NM_007343:exon3:c.G625A:p.A209T,PRSS3:NM_001197097:exon4:c.G496A:p.A166T	T	B	B	N	D	N	D	N	T	T	.	N	4.107	-0.667	0.008	14151.p1	Krumm	exome	autism
150999||10_17735316_G_A	10_17735316_G_A	150999||10_17735316_G_A||hg19.ET-8027-3-47049-52097-52188-53924[.][41][UPT]	NDD	chr10	17735316	G	A	17735221	17735311	+	downstream	5	0.983271	-0.154365	intronic	STAM	.	.	.	.	.	.	.	.	.	.	.	.	.	.	.	.	.	.	150999	ASC_v15_VCF	exome	autism	150999		151001	151000	Male
G01-GEA-290-HI||13_110861796_T_C	13_110861796_T_C	G01-GEA-290-HI||13_110861796_T_C||hg19.ET-1282-3-100170-100722-100758-101259[.][26][DNT]	NDD	chr13	110861796	T	C	110861739	110861774	-	upstream	-22	0.986016	-0.152964	intronic	COL4A1	.	.	.	.	.	.	.	.	.	.	.	.	.	.	.	.	.	.	G01-GEA-290-HI	ASC_v15_VCF	exome	autism	G01-GEA-290-HI		G01-GEA-290-PA	G01-GEA-290-MA	Male
DEASD_0397_001||1_193110969_A_G	1_193110969_A_G	DEASD_0397_001||1_193110969_A_G||hg19.ET-79577-3-19216-22892-23109-28909[.][25][UPT]	NDD	chr1	193110969	A	G	193110980	193111196	+	upstream	-11	0.957461	-0.151215	intronic	CDC73	.	.	.	.	.	.	.	.	.	.	.	.	.	.	.	.	.	.	DEASD_0397_001	ASC_v15_VCF	exome	autism	DEASD_0397_001		DEASD_0397_500	DEASD_0397_600	Male
13747.p1||4_997899_A_T	4_997899_A_T	13747.p1||4_997899_A_T||hg19.ET-3425-3-19629-20015-20116-20263[.][89][DNT]	NDD	chr4	997899	A	T	997800	997900	+	exonic.5ss	-1	0.939632	-0.14905	exonic	IDUA	.	synonymous SNV	IDUA:NM_000203:exon13:c.A1827T:p.P609P	.	.	.	.	.	.	.	.	.	.	.	.	.	.	.	13747.p1	Iossifov;ASC_v15_VCF	exome	autism	;13747		;13747.fa	;13747.mo	;Male
11476.p1||3_27427374_T_C	3_27427374_T_C	11476.p1||3_27427374_T_C||hg19.ET-9497-3-97490-101397-101529-104170[.][22]	NDD	chr3	27427374	T	C	27427383	27427514	-	downstream	9	0.985118	-0.148755	intronic	SLC4A7	.	.	.	.	.	.	.	.	.	.	.	.	.	.	.	.	.	.	11476.p1	Iossifov	exome	autism
DDDP105176||5_137848452_C_T	5_137848452_C_T	DDDP105176||5_137848452_C_T||hg19.ET-2107-3-32733-33346-33548-39349[.][1][UPT][DNT]	NDD	chr5	137848452	C	T	137848442	137848643	-	exonic.5ss	-10	0.489359	-0.147667	splicing	ETF1	NM_001291975:exon7:c.633+1G>A;NM_004730:exon6:c.732+1G>A;NM_001256302:exon6:c.633+1G>A;NM_001282185:exon5:c.690+1G>A;NM_001291974:exon6:c.633+1G>A	.	.	.	.	.	.	D	.	.	.	.	.	.	D	27.1	0.935	0.992	DDDP105176	Heyne_2018	exome	DD		simplex			female
12867.p1||5_64892348_C_T	5_64892348_C_T	12867.p1||5_64892348_C_T||hg19.ET-373-3-30310-30829-30940-32715[.][12]	NDD	chr5	64892348	C	T	64892248	64892358	-	exonic.3ss	10	0.976624	-0.146404	exonic	TRIM23	.	synonymous SNV	TRIM23:NM_001656:exon9:c.G1320A:p.V440V,TRIM23:NM_033227:exon9:c.G1320A:p.V440V,TRIM23:NM_033228:exon9:c.G1320A:p.V440V	.	.	.	.	.	.	.	.	.	.	.	.	.	.	.	12867.p1	Iossifov;Heyne_2018;ASC_v15_VCF	exome	autism;ASD	;12867	;simplex	;SSC06584	;SSC06113	;female;Female
11352.p1||2_191850362_C_T	2_191850362_C_T	11352.p1||2_191850362_C_T||hg19.ET-6772-3-30397-31590-31632-32857[.][73][UPT]	NDD	chr2	191850362	C	T	191850345	191850386	-	exonic.5ss	-17	0.980263	-0.146208	exonic	STAT1	.	nonsynonymous SNV	STAT1:NM_007315:exon15:c.G1246A:p.G416S,STAT1:NM_139266:exon15:c.G1246A:p.G416S	D	P	P	D	D	M	T	D	T	D	D	D	26.8	0.935	0.998	11352.p1	Iossifov;Heyne_2018	exome	autism;ASD		;simplex			;male
12906.p1||12_20890190_G_T	12_20890190_G_T	12906.p1||12_20890190_G_T||hg19.ET-53919-3-40750-44752-44918-47829[.][15]	NDD	chr12	20890190	G	T	20890041	20890206	+	exonic.5ss	-16	0.953006	-0.144865	exonic	SLCO1C1	.	nonsynonymous SNV	SLCO1C1:NM_001145944:exon9:c.G1178T:p.R393M,SLCO1C1:NM_001145945:exon11:c.G1385T:p.R462M,SLCO1C1:NM_017435:exon11:c.G1532T:p.R511M,SLCO1C1:NM_001145946:exon12:c.G1532T:p.R511M	D	B	B	N	N	N	T	N	T	T	T	D	23.8	1.048	0.98	12906.p1	Iossifov;Heyne_2018;ASC_v15_VCF	exome	autism;ASD	;12906	;simplex	;SSC07233	;SSC07231	;male;Male
hs||10_70696723_G_T	10_70696723_G_T	hs||10_70696723_G_T||hg19.ET-79009-3-37802-38658-38818-42782[.][26][DNT]	NDD	chr10	70696723	G	T	70696692	70696851	+	exonic.3ss	31	0.938132	-0.144183	exonic	DDX50	.	nonsynonymous SNV	DDX50:NM_024045:exon12:c.G1627T:p.D543Y	D	D	P	D	D	M	T	D	T	T	T	D	29	0.998	1	hs	Heyne_2018	exome	EE		simplex			female
08C74339||4_187070343_G_T	4_187070343_G_T	08C74339||4_187070343_G_T||hg19.ET-25854-3-3272-7332-7443-7725[.][8][UPT][DNT]	NDD	chr4	187070343	G	T	187070327	187070437	+	exonic.3ss	16	0.968641	-0.143004	UTR5	FAM149A	NM_001006655:c.-2771G>T;NM_001350178:c.-2771G>T;NM_001350179:c.-2771G>T;NM_015398:c.-2771G>T	.	.	.	.	.	N	A	.	.	.	.	.	.	D	10.19	0.095	0.722	08C74339	ASC_v15_VCF	exome	autism	08C74339		08C74346	08C74340	Male
14011.p1||22_50316255_T_C	22_50316255_T_C	14011.p1||22_50316255_T_C||hg19.ET-79174-3-6127-6977-7073-7599[.][41][UPT][DNT]	NDD	chr22	50316255	T	C	50316260	50316355	+	upstream	-5	0.977018	-0.141318	intronic	CRELD2	.	.	.	.	.	.	.	.	.	.	.	.	.	.	.	.	.	.	14011.p1	Krumm	exome	autism
DDDP111736||6_111208734_A_G	6_111208734_A_G	DDDP111736||6_111208734_A_G||hg19.ET-262-3-3432-15721-15808-17073[.][525][UPT][DNT]	NDD	chr6	111208734	A	G	111208708	111208794	+	exonic.3ss	26	0.971939	-0.140871	exonic	AMD1	.	nonsynonymous SNV	AMD1:NM_001634:exon2:c.A137G:p.D46G	T	B	B	N	D	L	.	N	T	T	T	D	20.6	1.14	1	DDDP111736	Heyne_2018	exome	DD		simplex			male
kb||7_92207491_C_T	7_92207491_C_T	kb||7_92207491_C_T||hg19.ET-257415-3-15074-15210-15243-15675[.][35][UPT][DNT]	NDD	chr7	92207491	C	T	92207464	92207496	-	exonic.3ss	5	0.977471	-0.1406	exonic	FAM133B	.	synonymous SNV	FAM133B:NM_001288584:exon5:c.G252A:p.K84K,FAM133B:NM_152789:exon5:c.G282A:p.K94K,FAM133B:NM_001040057:exon6:c.G252A:p.K84K	.	.	.	.	.	.	.	.	.	.	.	.	.	.	.	kb	Heyne_2018	exome	EE		simplex			male
ASC_CA_65_A||9_132631286_G_A	9_132631286_G_A	ASC_CA_65_A||9_132631286_G_A||hg19.ET-10868-3-36033-36445-36586-36893[.][11]	NDD	chr9	132631286	G	A	132631141	132631281	+	downstream	5	0.952531	-0.139843	intronic	USP20	.	.	.	.	.	.	.	.	.	.	.	.	.	.	.	.	.	.	ASC_CA_65_A	ASC_v15_VCF	exome	autism	ASC_CA_65_A		ASC_CA_65_P	ASC_CA_65_M	Male
20||19_2127153_G_A	19_2127153_G_A	20||19_2127153_G_A||hg19.ET-8943-3-25468-27356-27406-30678[.][38][UPT][DNT]	NDD	chr19	2127153	G	A	2127151	2127200	-	exonic.5ss	-2	0.975297	-0.138797	exonic	AP3D1	.	nonsynonymous SNV	AP3D1:NM_001261826:exon9:c.C854T:p.A285V,AP3D1:NM_003938:exon9:c.C854T:p.A285V	D	D	P	D	D	M	T	D	T	T	D	D	29.3	0.943	0.947	20	McCarthy2014	exome	schizophrenia
DEASD_0450_001||2_102480266_T_A	2_102480266_T_A	DEASD_0450_001||2_102480266_T_A||hg19.ET-9448-3-165162-169118-169349-170227[.][5][UPT][DNT]	NDD	chr2	102480266	T	A	102480283	102480513	+	upstream	-17	0.435849	-0.137969	intronic	MAP4K4	.	.	.	.	.	.	.	.	.	.	.	.	.	.	.	.	.	.	DEASD_0450_001	ASC_v15_VCF	exome	autism	DEASD_0450_001		DEASD_0450_500	DEASD_0450_600	Male
11254.p1||6_33400029_G_A	6_33400029_G_A	11254.p1||6_33400029_G_A||hg19.ET-8831-3-8834-15091-15183-15615[.][5][UPT]	NDD	chr6	33400029	G	A	33399938	33400029	+	exonic.5ss	0	0.981706	-0.137874	exonic	SYNGAP1	.	synonymous SNV	SYNGAP1:NM_001130066:exon4:c.G387A:p.S129S,SYNGAP1:NM_006772:exon4:c.G387A:p.S129S	.	.	.	.	.	.	.	.	.	.	.	.	.	.	.	11254.p1	Krumm;ASC_v15_VCF	exome	autism	;11254		;11254.fa	;11254.mo	;Male
11504.p1||6_33400029_G_A	6_33400029_G_A	11504.p1||6_33400029_G_A||hg19.ET-8831-3-8834-15091-15183-15615[.][5][UPT]	NDD	chr6	33400029	G	A	33399938	33400029	+	exonic.5ss	0	0.981706	-0.137874	exonic	SYNGAP1	.	synonymous SNV	SYNGAP1:NM_001130066:exon4:c.G387A:p.S129S,SYNGAP1:NM_006772:exon4:c.G387A:p.S129S	.	.	.	.	.	.	.	.	.	.	.	.	.	.	.	11504.p1	Iossifov	exome	autism
11432.p1||7_30486597_G_A	7_30486597_G_A	11432.p1||7_30486597_G_A||hg19.ET-10392-3-33480-34727-34811-35553[.][6]	NDD	chr7	30486597	G	A	30486583	30486666	-	exonic.5ss	-14	0.753305	-0.137715	exonic	NOD1	.	synonymous SNV	NOD1:NM_006092:exon8:c.C2355T:p.G785G	.	.	.	.	.	.	.	.	.	.	.	.	.	.	.	11432.p1	Iossifov;Werling_WGS_call	exome	autism	;11432		;11432.fa	;11432.mo	;Male
DDDP109899||5_109181656_C_T	5_109181656_C_T	DDDP109899||5_109181656_C_T||hg19.ET-4124-3-156007-159410-159552-161202[.][13]	NDD	chr5	109181656	C	T	109181566	109181707	+	exonic.5ss	-51	0.967602	-0.137459	exonic	MAN2A1	.	nonsynonymous SNV	MAN2A1:NM_002372:exon18:c.C2791T:p.R931C	D	D	D	D	D	H	D	D	D	D	D	D	31	0.935	0.005	DDDP109899	Heyne_2018	exome	DD		simplex			male
DDDP101963||15_73021960_G_A	15_73021960_G_A	DDDP101963||15_73021960_G_A||hg19.ET-585-3-44816-46437-46506-48126[.][43]	NDD	chr15	73021960	G	A	73021957	73022025	+	exonic.3ss	3	0.946778	-0.135465	exonic	BBS4	.	nonsynonymous SNV	BBS4:NM_001252678:exon9:c.G130A:p.G44S,BBS4:NM_033028:exon10:c.G646A:p.G216S	D	P	B	D	D	M	T	D	T	T	D	D	31	1.048	0.555	DDDP101963	Heyne_2018	exome	DD		simplex			male
14330.p1||17_681978_G_A	17_681978_G_A	14330.p1||17_681978_G_A||hg19.ET-51031-3-3166-6587-6637-8343[.][243][UPT][DNT]	NDD	chr17	681978	G	A	681935	681984	-	exonic.3ss	6	0.961977	-0.133656	exonic	GLOD4	.	nonsynonymous SNV	GLOD4:NM_016080:exon2:c.C97T:p.R33W	D	D	P	U	D	.	T	D	D	T	D	D	34	1.048	0.94	14330.p1	Iossifov;ASC_v15_VCF	exome	autism	;14330		;14330.fa	;14330.mo	;Female
62||2_219498436_A_G	2_219498436_A_G	62||2_219498436_A_G||hg19.ET-84812-3-27548-28840-28997-29340[.][4]	NDD	chr2	219498436	A	G	219498328	219498484	+	exonic.5ss	-48	0.710123	-0.133445	exonic	PLCD4	.	nonsynonymous SNV	PLCD4:NM_032726:exon11:c.A1558G:p.I520V	T	B	B	N	N	N	T	N	T	T	T	D	13.13	1.194	0.981	62	McCarthy2014	exome	schizophrenia
DEASD_0439_001||17_4642222_G_C	17_4642222_G_C	DEASD_0439_001||17_4642222_G_C||hg19.ET-58191-3-3668-4008-4147-4438[.][70][UPT][DNT]	NDD	chr17	4642222	G	C	4642077	4642215	-	upstream	-7	0.965307	-0.132626	intronic	CXCL16	.	.	.	.	.	.	.	.	.	.	.	.	.	.	.	.	.	.	DEASD_0439_001	ASC_v15_VCF	exome	autism	DEASD_0439_001		DEASD_0439_500	DEASD_0439_600	Female
DDDP112641||X_107372043_C_T	X_107372043_C_T	DDDP112641||X_107372043_C_T||hg19.ET-115201-3-37519-40112-40184-42591[.][90][UPT]	NDD	chrX	107372043	C	T	107372011	107372082	+	exonic.3ss	32	0.967134	-0.131214	exonic	ATG4A	.	nonsynonymous SNV	ATG4A:NM_052936:exon3:c.C154T:p.R52C,ATG4A:NM_178270:exon3:c.C154T:p.R52C	D	D	D	D	D	M	T	D	D	T	D	D	35	0.852	0.999	DDDP112641	Heyne_2018	exome	DD		simplex			female
DDDP111331||5_158621832_C_A	5_158621832_C_A	DDDP111331||5_158621832_C_A||hg19.ET-153830-3-9620-18229-18338-31002[.][26][DNT]	NDD	chr5	158621832	C	A	158621724	158621832	-	exonic.3ss	0	0.982362	-0.131118	exonic	RNF145	.	nonsynonymous SNV	RNF145:NM_001199380:exon3:c.G275T:p.G92V,RNF145:NM_001199381:exon3:c.G236T:p.G79V,RNF145:NM_001199382:exon3:c.G227T:p.G76V,RNF145:NM_001199383:exon3:c.G185T:p.G62V,RNF145:NM_144726:exon3:c.G269T:p.G90V	T	D	D	N	D	L	D	D	T	D	.	D	26.3	0.935	0.986	DDDP111331	Heyne_2018	exome	DD		simplex			female
NDAR_INVWL738LDP_wes1||1_91973842_G_T	1_91973842_G_T	NDAR_INVWL738LDP_wes1||1_91973842_G_T||hg19.ET-8317-3-10091-10415-10551-13750[.][64][DNT]	NDD	chr1	91973842	G	T	91973819	91973954	+	exonic.3ss	23	0.982861	-0.130206	exonic	CDC7	.	nonsynonymous SNV	CDC7:NM_001134419:exon4:c.G223T:p.A75S,CDC7:NM_001134420:exon4:c.G223T:p.A75S,CDC7:NM_003503:exon4:c.G223T:p.A75S	D	D	D	D	D	M	T	N	T	T	T	D	27.8	1.048	1	NDAR_INVWL738LDP_wes1	DeRubeis2014;De_Rubeis_Nature_2014	exome	autism	;NDAR_INVWL738LDP_wes1		;NDAR_INVTB296FVH_wes1	;NDAR_INVGX498LK0_wes1	;Female
C1052-03||1_89521911_C_A	1_89521911_C_A	C1052-03||1_89521911_C_A||hg19.ET-2633-3-11507-12132-12345-13145[.][17]	NDD	chr1	89521911	C	A	89521699	89521911	-	exonic.3ss	0	0.92988	-0.130117	exonic	GBP1	.	nonsynonymous SNV	GBP1:NM_002053:exon8:c.G1156T:p.A386S	T	B	B	N	N	L	T	N	T	T	.	N	6.564	-0.008	0.185	C1052-03	Willsey2017	exome	tourette_syndrome
08C72794||14_21882516_G_T	14_21882516_G_T	08C72794||14_21882516_G_T||hg19.ET-57680-3-25361-25880-25998-27302[.][9]	NDD	chr14	21882516	G	T	21882460	21882577	-	exonic.5ss	-56	0.980613	-0.129502	exonic	CHD8	.	nonsynonymous SNV	CHD8:NM_001170629:exon8:c.C2086A:p.Q696K,CHD8:NM_020920:exon9:c.C1249A:p.Q417K	T	P	P	D	D	M	T	D	T	T	D	D	28.7	1.048	1	08C72794	ASC_v15_VCF	exome	autism	08C72794		08C72796	08C72795	Male
AU2371303||X_29938021_T_G	X_29938021_T_G	AU2371303||X_29938021_T_G||hg19.ET-11141-3-1333033-1335385-1335531-1357087[.][2][UPT]	NDD	chrX	29938021	T	G	29938066	29938211	+	upstream	-45	0.973709	-0.128906	intronic	IL1RAPL1	.	.	.	.	.	.	.	.	.	.	.	.	.	.	.	.	.	.	AU2371303	ASC_v15_VCF	exome	autism	AU2371303		AU2371201	AU2371202	Female
635|Lelieveld_635||5_16704688_C_T	5_16704688_C_T	635|Lelieveld_635||5_16704688_C_T||hg19.ET-4651-3-228369-234591-234698-236118[.][45]	NDD	chr5	16704688	C	T	16704688	16704794	-	exonic.5ss	0	0.977062	-0.128472	exonic	MYO10	.	nonsynonymous SNV	MYO10:NM_012334:exon22:c.G2276A:p.R759Q	D	D	D	.	D	M	T	D	D	D	D	D	33	0.935	0.936	635|Lelieveld_635	Heyne_2018;Lelieveld2016	exome	ID;intellectualDisability		simplex;			male;
AU187A||11_13733355_G_A	11_13733355_G_A	AU187A||11_13733355_G_A||hg19.ET-84188-3-45212-46105-46150-46269[.][18]	NDD	chr11	13733355	G	A	13733311	13733355	+	exonic.5ss	0	0.975037	-0.128001	exonic	FAR1	.	synonymous SNV	FAR1:NM_032228:exon6:c.G768A:p.A256A	.	.	.	.	.	.	.	.	.	.	.	.	.	.	.	AU187A	DeRubeis2014;ASC_v15_VCF	exome	autism	;AU187A		;AU187B	;AU187C	;Female
08C74464||1_210536201_G_A	1_210536201_G_A	08C74464||1_210536201_G_A||hg19.ET-55733-3-23815-37600-37668-62216[.][45]	NDD	chr1	210536201	G	A	210536196	210536263	+	exonic.3ss	5	0.496735	-0.127805	exonic	HHAT	.	nonsynonymous SNV	HHAT:NM_001170587:exon2:c.G100A:p.E34K,HHAT:NM_001122834:exon3:c.G97A:p.E33K,HHAT:NM_001170564:exon3:c.G97A:p.E33K,HHAT:NM_001170580:exon3:c.G97A:p.E33K,HHAT:NM_001170588:exon3:c.G97A:p.E33K,HHAT:NM_018194:exon3:c.G97A:p.E33K	D	D	D	N	D	M	T	N	T	T	T	D	24	1.044	0.998	08C74464	ASC_v15_VCF	exome	autism	08C74464		08C74466	08C74465	Female
49||8_48868449_C_T	8_48868449_C_T	49||8_48868449_C_T||hg19.ET-5591-3-6013-7235-7310-8737[.][21]	NDD	chr8	48868449	C	T	48868434	48868508	-	exonic.5ss	-15	0.97572	-0.12696	exonic	PRKDC	.	unknown	UNKNOWN	.	.	.	.	.	.	.	.	.	.	.	.	.	.	.	49	McCarthy2014	exome	schizophrenia
11488.p1||17_73209219_G_T	17_73209219_G_T	11488.p1||17_73209219_G_T||hg19.ET-79902-3-9561-10574-10618-13252[.][246][DNT]	NDD	chr17	73209219	G	T	73209171	73209214	+	downstream	5	0.983178	-0.125069	intronic	NUP85	.	.	.	.	.	.	.	.	.	.	.	.	.	.	.	.	.	.	11488.p1	Krumm	exome	autism
14484.p1||2_183866852_T_C	2_183866852_T_C	14484.p1||2_183866852_T_C||hg19.ET-10787-3-38528-39232-39375-39458[.][52][UPT]	NDD	chr2	183866852	T	C	183866855	183866997	-	downstream	3	0.978791	-0.124081	intronic	NCKAP1	.	.	.	.	.	.	.	.	.	.	.	.	.	.	.	.	.	.	14484.p1	Iossifov;ASC_v15_VCF	exome	autism	;14484		;14484.fa	;14484.mo	;Male
DEASD_0398_001||16_84217396_A_C	16_84217396_A_C	DEASD_0398_001||16_84217396_A_C||hg19.ET-9013-3-5220-6292-6374-6563[.][180][UPT][DNT]	NDD	chr16	84217396	A	C	84217303	84217384	-	upstream	-12	0.938414	-0.123363	intronic	TAF1C	.	.	.	.	.	.	.	.	.	.	.	.	.	.	.	.	.	.	DEASD_0398_001	ASC_v15_VCF	exome	autism	DEASD_0398_001		DEASD_0398_500	DEASD_0398_600	Male
80247551||10_94267962_C_G	10_94267962_C_G	80247551||10_94267962_C_G||hg19.ET-3416-3-68368-68890-68983-69429[.][24][UPT]	NDD	chr10	94267962	C	G	94267870	94267962	-	exonic.3ss	0	0.971986	-0.122909	exonic	IDE	.	nonsynonymous SNV	IDE:NM_001322794:exon7:c.G944C:p.G315A,IDE:NM_001322793:exon8:c.G1061C:p.G354A,IDE:NM_001322796:exon8:c.G938C:p.G313A,IDE:NM_004969:exon8:c.G1061C:p.G354A,IDE:NM_001322795:exon9:c.G938C:p.G313A	T	D	D	D	D	M	T	D	T	T	.	D	27.3	0.935	1	80247551	Willsey2017	exome	tourette_syndrome
AU104A||6_170065622_G_A	6_170065622_G_A	AU104A||6_170065622_G_A||hg19.ET-253769-3-37928-39507-39578-40777[.][3][UPT]	NDD	chr6	170065622	G	A	170065582	170065652	-	exonic.3ss	30	0.33847	-0.12083	exonic	WDR27	.	nonsynonymous SNV	WDR27:NM_001202550:exon4:c.C362T:p.A121V,WDR27:NM_001350625:exon6:c.C539T:p.A180V,WDR27:NM_001350624:exon7:c.C539T:p.A180V,WDR27:NM_182552:exon7:c.C743T:p.A248V	T	B	B	N	A	L	T	N	T	T	.	N	2.805	0.017	0.001	AU104A	DeRubeis2014;ASC_v15_VCF	exome	autism	;AU104A		;AU104B	;AU104C	;Male
08C77633||12_102164185_T_C	12_102164185_T_C	08C77633||12_102164185_T_C||hg19.ET-79158-3-62872-63282-63462-63676[.][13]	NDD	chr12	102164185	T	C	102164184	102164363	-	exonic.5ss	-1	0.979166	-0.119903	exonic	GNPTAB	.	nonsynonymous SNV	GNPTAB:NM_024312:exon9:c.A1112G:p.Q371R	D	B	B	D	D	N	D	N	D	D	D	D	27	1.061	0.968	08C77633	DeRubeis2014;ASC_v15_VCF	exome	autism	;08C77633		;08C77635	;08C77634	;Male
80001101183||2_189927585_A_T	2_189927585_A_T	80001101183||2_189927585_A_T||hg19.ET-1290-3-119870-119961-120015-121264[.][10][DNT]	NDD	chr2	189927585	A	T	189927591	189927644	-	downstream	6	0.980479	-0.118864	intronic	COL5A2	.	.	.	.	.	.	.	.	.	.	.	.	.	.	.	.	.	.	80001101183	ASC_v15_VCF	exome	autism	80001101183		80001101183-2	80001101183-1	Male
UK10K_SKUSE5080186||16_17228330_C_T	16_17228330_C_T	UK10K_SKUSE5080186||16_17228330_C_T||hg19.ET-64131-3-335527-339146-339409-346020[.][4]	NDD	chr16	17228330	C	T	17228330	17228592	-	exonic.5ss	0	0.978129	-0.118088	exonic	XYLT1	.	nonsynonymous SNV	XYLT1:NM_022166:exon9:c.G2027A:p.R676Q	T	P	P	D	D	M	T	N	T	T	D	D	28.6	0.852	0.975	UK10K_SKUSE5080186	DeRubeis2014;De_Rubeis_Nature_2014	exome	autism	;UK10K_SKUSE5080186		;UK10K_SKUSE5208456	;UK10K_SKUSE5208457	;Male
aiv||3_148773099_G_A	3_148773099_G_A	aiv||3_148773099_G_A||hg19.ET-6596-3-29837-34154-34252-39179[.][14]	NDD	chr3	148773099	G	A	148773090	148773187	-	exonic.5ss	-9	0.965593	-0.116566	exonic	HLTF	.	synonymous SNV	HLTF:NM_001318934:exon14:c.C1461T:p.S487S,HLTF:NM_001318935:exon14:c.C1464T:p.S488S,HLTF:NM_003071:exon14:c.C1464T:p.S488S,HLTF:NM_139048:exon14:c.C1464T:p.S488S	.	.	.	.	.	.	.	.	.	.	.	.	.	.	.	aiv	Heyne_2018	exome	EE		simplex			female
08C75155||2_109367972_T_G	2_109367972_T_G	08C75155||2_109367972_T_G||hg19.ET-5903-3-34965-35047-35223-35390[.][3]	NDD	chr2	109367972	T	G	109367984	109368159	+	upstream	-12	0.954466	-0.11541	intronic	RANBP2	.	.	.	.	.	.	.	.	.	.	.	.	.	.	.	.	.	.	08C75155	ASC_v15_VCF	exome	autism	08C75155		08C75156	08C75157	Male
03HI2712A||2_166179685_G_T	2_166179685_G_T	03HI2712A||2_166179685_G_T||hg19.ET-6326-3-79357-86754-87099-90450[.][4]	NDD	chr2	166179685	G	T	166179666	166180010	+	exonic.3ss	19	0.985047	-0.115404	exonic	SCN2A	.	nonsynonymous SNV	SCN2A:NM_001040143:exon11:c.G1691T:p.G564V,SCN2A:NM_001040142:exon12:c.G1691T:p.G564V,SCN2A:NM_021007:exon12:c.G1691T:p.G564V	D	P	B	D	D	M	D	D	D	D	D	D	31	1.038	1	03HI2712A	ASC_v15_VCF	exome	autism	03HI2712A		03HI2715A	03HI2716A	Female
13254.p1||1_43213394_C_T	1_43213394_C_T	13254.p1||1_43213394_C_T||hg19.ET-64175-3-21885-22286-22362-22672[.][55][UPT][DNT]	NDD	chr1	43213394	C	T	43213394	43213469	-	exonic.5ss	0	0.973384	-0.114624	exonic	P3H1	.	synonymous SNV	P3H1:NM_001146289:exon13:c.G1914A:p.T638T,P3H1:NM_001243246:exon13:c.G1914A:p.T638T,P3H1:NM_022356:exon13:c.G1914A:p.T638T	.	.	.	.	.	.	.	.	.	.	.	.	.	.	.	13254.p1	Iossifov;ASC_v15_VCF	exome	autism	;13254		;SSC07376	;SSC07372	;Male
DDDP117699||8_2954495_C_T	8_2954495_C_T	DDDP117699||8_2954495_C_T||hg19.ET-64478-3-1891279-1900769-1900958-1906144[.][3][UPT]	NDD	chr8	2954495	C	T	2954371	2954559	-	exonic.3ss	64	0.974355	-0.112396	exonic	CSMD1	.	synonymous SNV	CSMD1:NM_033225:exon47:c.G7014A:p.P2338P	.	.	.	.	.	.	.	.	.	.	.	.	.	.	.	DDDP117699	Heyne_2018	exome	DD		simplex			female
13858.p1||1_241676892_T_C	1_241676892_T_C	13858.p1||1_241676892_T_C||hg19.ET-2271-3-5604-9072-9183-10642[.][253][UPT][DNT]	NDD	chr1	241676892	T	C	241676903	241677013	-	downstream	11	0.977388	-0.11063	intronic	FH	.	.	.	.	.	.	.	.	.	.	.	.	.	.	.	.	.	.	13858.p1	ASC_v15_VCF	exome	autism	13858		SSC09416	SSC09408	Male
08C78393||13_36006374_A_G	13_36006374_A_G	08C78393||13_36006374_A_G||hg19.ET-26960-3-413037-492982-493107-512805[.][15]	NDD	chr13	36006374	A	G	36006406	36006530	+	upstream	-32	0.976296	-0.109601	intronic	NBEA	.	.	.	.	.	.	.	.	.	.	.	.	.	.	.	.	.	.	08C78393	ASC_v15_VCF	exome	autism	08C78393		08C78394	08C78395	Male
11056.p1||20_19646477_C_G	20_19646477_C_G	11056.p1||20_19646477_C_G||hg19.ET-57419-3-444491-456218-456244-463955[.][6]	NDD	chr20	19646477	C	G	19646508	19646533	+	upstream	-31	0.98559	-0.109591	intronic	SLC24A3	.	.	.	.	.	.	.	.	.	.	.	.	.	.	.	.	.	.	11056.p1	ASC_v15_VCF	exome	autism	11056		5257	5289	Male
1396022||1_236708166_A_G	1_236708166_A_G	1396022||1_236708166_A_G||hg19.ET-3964-3-28435-29536-29702-32798[.][54][UPT][DNT]	NDD	chr1	236708166	A	G	236708050	236708215	+	exonic.5ss	-49	0.950138	-0.109447	exonic	LGALS8	.	nonsynonymous SNV	LGALS8:NM_201544:exon9:c.A755G:p.E252G,LGALS8:NM_201543:exon10:c.A755G:p.E252G,LGALS8:NM_006499:exon11:c.A881G:p.E294G,LGALS8:NM_201545:exon11:c.A881G:p.E294G	D	D	P	D	D	H	T	D	T	T	D	D	33	1.199	1	1396022	ASC_v15_VCF	exome	autism	1396022		1396011	1396012	Female
DDDP106936||6_153073362_G_T	6_153073362_G_T	DDDP106936||6_153073362_G_T||hg19.ET-7432-3-3162-4370-4487-6368[.][30][UPT]	NDD	chr6	153073362	G	T	153073303	153073419	+	exonic.5ss	-57	0.971971	-0.108869	exonic	VIP	.	nonsynonymous SNV	VIP:NM_003381:exon2:c.G50T:p.S17I,VIP:NM_194435:exon2:c.G50T:p.S17I	T	P	P	D	D	M	T	N	T	T	T	D	11.39	0.998	0.004	DDDP106936	Heyne_2018	exome	DD		simplex			female
09C98906||4_87705622_C_G	4_87705622_C_G	09C98906||4_87705622_C_G||hg19.ET-5783-3-190948-193150-193244-193916[.][17]	NDD	chr4	87705622	C	G	87705618	87705711	+	exonic.3ss	4	0.908275	-0.108442	exonic	PTPN13	.	nonsynonymous SNV	PTPN13:NM_080684:exon35:c.C5456G:p.A1819G,PTPN13:NM_006264:exon37:c.C5972G:p.A1991G,PTPN13:NM_080683:exon38:c.C6029G:p.A2010G,PTPN13:NM_080685:exon38:c.C6044G:p.A2015G	T	B	B	N	N	N	T	N	T	T	T	D	11	0.16	0.2	09C98906	DeRubeis2014	exome	autism
14217.p1||7_157177678_A_G	7_157177678_A_G	14217.p1||7_157177678_A_G||hg19.ET-10049-3-48362-50851-50993-51525[.][116][UPT][DNT]	NDD	chr7	157177678	A	G	157177561	157177702	+	exonic.5ss	-24	0.982149	-0.108023	exonic	DNAJB6	.	nonsynonymous SNV	DNAJB6:NM_005494:exon7:c.A596G:p.N199S,DNAJB6:NM_058246:exon7:c.A596G:p.N199S	D	D	D	N	D	H	T	D	T	T	D	D	22.8	0.003	0.877	14217.p1	Iossifov;ASC_v15_VCF	exome	autism	;14217		;14217.fa	;14217.mo	;Female
13769.p1||7_81662204_C_G	7_81662204_C_G	13769.p1||7_81662204_C_G||hg19.ET-781-3-408639-413814-413919-432236[.][7]	NDD	chr7	81662204	C	G	81662113	81662217	-	exonic.3ss	13	0.980453	-0.105684	exonic	CACNA2D1	.	nonsynonymous SNV	CACNA2D1:NM_000722:exon12:c.G1052C:p.R351T	D	D	D	D	D	M	D	D	D	D	D	D	26.6	0.807	1	13769.p1	Iossifov;Heyne_2018;ASC_v15_VCF	exome	autism;ASD	;13769	;simplex	;13769.fa	;13769.mo	;male;Male
556|Lelieveld_556||1_27097817_G_A	1_27097817_G_A	556|Lelieveld_556||1_27097817_G_A||hg19.ET-8289-3-74969-78088-78296-79469[.][16][UPT]	NDD	chr1	27097817	G	A	27097610	27097817	+	exonic.5ss	0	0.981351	-0.105287	exonic	ARID1A	.	nonsynonymous SNV	ARID1A:NM_006015:exon12:c.G3406A:p.A1136T,ARID1A:NM_139135:exon12:c.G3406A:p.A1136T	D	D	D	D	D	L	T	D	T	T	.	D	22.1	0.998	1	556|Lelieveld_556	Heyne_2018;Lelieveld2016	exome	ID;intellectualDisability		simplex;			male;
4275-1||9_19089470_C_G	9_19089470_C_G	4275-1||9_19089470_C_G||hg19.ET-54801-3-12734-16345-16493-18748[.][19]	NDD	chr9	19089470	C	G	19089410	19089557	-	exonic.5ss	-60	0.949555	-0.10392	exonic	HAUS6	.	nonsynonymous SNV	HAUS6:NM_001270890:exon5:c.G524C:p.R175T,HAUS6:NM_017645:exon5:c.G524C:p.R175T	D	P	P	N	N	M	T	D	T	T	T	D	23.1	0.063	0.991	4275-1	Fromer2014	exome	schizophrenia
AU1939301||18_54361875_G_A	18_54361875_G_A	AU1939301||18_54361875_G_A||hg19.ET-23335-3-43433-46234-46376-46565[.][7]	NDD	chr18	54361875	G	A	54361850	54361991	+	exonic.3ss	25	0.978856	-0.102111	exonic	WDR7	.	nonsynonymous SNV	WDR7:NM_015285:exon10:c.G992A:p.R331Q,WDR7:NM_052834:exon10:c.G992A:p.R331Q	T	B	B	D	D	L	T	N	T	T	T	D	24.1	0.998	1	AU1939301	ASC_v15_VCF	exome	autism	AU1939301		AU1939201	AU1939202	Female
hx||5_179042592_T_C	5_179042592_T_C	hx||5_179042592_T_C||hg19.ET-3187-3-10596-11126-11176-11762[.][58][DNT]	NDD	chr5	179042592	T	C	179042547	179042596	-	exonic.3ss	4	0.920404	-0.101979	exonic	HNRNPH1	.	synonymous SNV	HNRNPH1:NM_001257293:exon13:c.A1305G:p.Q435Q,HNRNPH1:NM_005520:exon13:c.A1305G:p.Q435Q	.	.	.	.	.	.	.	.	.	.	.	.	.	.	.	hx	Heyne_2018	exome	EE		simplex			male
DDDP118325||1_160264581_T_C	1_160264581_T_C	DDDP118325||1_160264581_T_C||hg19.ET-1314-3-50829-51707-51797-51971[.][91][DNT]	NDD	chr1	160264581	T	C	160264558	160264647	-	exonic.5ss	-23	0.982957	-0.100967	exonic	COPA	.	nonsynonymous SNV	COPA:NM_001098398:exon24:c.A2570G:p.D857G,COPA:NM_004371:exon24:c.A2543G:p.D848G	T	B	B	D	D	M	T	D	T	T	D	D	23.3	1.049	0.997	DDDP118325	Heyne_2018	exome	DD		simplex			male
MR_278||16_66422333_C_T	16_66422333_C_T	MR_278||16_66422333_C_T||hg19.ET-1003-3-23476-24702-24819-25736[.][17][UPT]	NDD	chr16	66422333	C	T	66422227	66422343	+	exonic.5ss	-10	0.970277	-0.100834	exonic	CDH5	.	synonymous SNV	CDH5:NM_001795:exon4:c.C606T:p.I202I	.	.	.	.	.	.	.	.	.	.	.	.	.	.	.	MR_278	ASC_v15_VCF	exome	autism	MR_278		MR_270	MR_271	Female
7902-04-003||12_110456188_C_T	12_110456188_C_T	7902-04-003||12_110456188_C_T||hg19.ET-88455-3-20004-21915-22059-22709[.][27]	NDD	chr12	110456188	C	T	110456150	110456293	+	exonic.3ss	38	0.887522	-0.0992862	exonic	ANKRD13A	.	nonsynonymous SNV	ANKRD13A:NM_033121:exon5:c.C439T:p.R147C	D	D	D	D	D	M	T	D	T	T	D	D	34	0.935	1	7902-04-003	ASC_v15_VCF	exome	autism	7902-04-003		7902-04-003-02	7902-04-003-01	Male
Lelieveld_81||3_49760504_T_A	3_49760504_T_A	Lelieveld_81||3_49760504_T_A||hg19.ET-29925-3-3698-3837-3980-4197[.][54][DNT]	NDD	chr3	49760504	T	A	49760405	49760547	-	exonic.3ss	43	0.923936	-0.0992058	exonic	GMPPB	.	synonymous SNV	GMPPB:NM_013334:exon4:c.A303T:p.A101A,GMPPB:NM_021971:exon4:c.A303T:p.A101A	.	.	.	.	.	.	.	.	.	.	.	.	.	.	.	Lelieveld_81	Lelieveld2016	exome	intellectualDisability
09C83621||17_43213890_G_C	17_43213890_G_C	09C83621||17_43213890_G_C||hg19.ET-79777-3-6633-6900-7021-7092[.][54][UPT]	NDD	chr17	43213890	G	C	43213867	43213987	+	exonic.3ss	23	0.848975	-0.0990221	exonic	ACBD4	.	nonsynonymous SNV	ACBD4:NM_024722:exon2:c.G112C:p.E38Q,ACBD4:NM_001135705:exon3:c.G112C:p.E38Q,ACBD4:NM_001135706:exon3:c.G112C:p.E38Q,ACBD4:NM_001135707:exon3:c.G112C:p.E38Q,ACBD4:NM_001321352:exon5:c.G112C:p.E38Q,ACBD4:NM_001321353:exon5:c.G112C:p.E38Q	T	B	B	D	D	L	T	N	T	T	T	D	23.7	1.048	1	09C83621	ASC_v15_VCF	exome	autism	09C83621		09C83619	09C83618	Male
708|Lelieveld_708||2_55464535_C_A	2_55464535_C_A	708|Lelieveld_708||2_55464535_C_A||hg19.ET-4528-3-32238-34820-34961-35428[.][62][UPT][DNT]	NDD	chr2	55464535	C	A	55464424	55464564	-	exonic.3ss	29	0.970073	-0.0989908	exonic	MTIF2	.	nonsynonymous SNV	MTIF2:NM_001321004:exon14:c.G1900T:p.V634L,MTIF2:NM_001321005:exon14:c.G1171T:p.V391L,MTIF2:NM_001321001:exon15:c.G1900T:p.V634L,MTIF2:NM_001321002:exon15:c.G1900T:p.V634L,MTIF2:NM_002453:exon15:c.G1900T:p.V634L,MTIF2:NM_001005369:exon16:c.G1900T:p.V634L,MTIF2:NM_001321003:exon16:c.G1900T:p.V634L	D	B	B	N	D	M	T	N	T	T	T	D	20.7	-0.859	0.974	708|Lelieveld_708	Heyne_2018;Lelieveld2016	exome	ID;intellectualDisability		simplex;			female;
Kun-Rodrigues5||19_12858398_C_G	19_12858398_C_G	Kun-Rodrigues5||19_12858398_C_G||hg19.ET-439-3-12813-12903-13101-13481[.][86][UPT][DNT]	NDD	chr19	12858398	C	G	12858209	12858406	+	exonic.5ss	-8	0.974108	-0.0987296	exonic	ASNA1	.	nonsynonymous SNV	ASNA1:NM_004317:exon6:c.C907G:p.L303V	D	B	B	N	D	M	T	D	T	T	T	D	24.1	0.925	1	Kun-Rodrigues5	Kun-Rodrigues	exome	early_onset_parkinson
14196.p1||11_64419601_C_T	11_64419601_C_T	14196.p1||11_64419601_C_T||hg19.ET-9379-3-72493-74034-74154-74552[.][7][UPT][DNT]	NDD	chr11	64419601	C	T	64419507	64419626	-	exonic.3ss	25	0.846117	-0.097487	exonic	NRXN2	.	synonymous SNV	NRXN2:NM_138732:exon11:c.G2322A:p.A774A,NRXN2:NM_015080:exon13:c.G2442A:p.A814A	.	.	.	.	.	.	.	.	.	.	.	.	.	.	.	14196.p1	Krumm;ASC_v15_VCF	exome	autism	;14196		;14196.fa	;14196.mo	;Male
12335.p1||2_219537583_G_A	2_219537583_G_A	12335.p1||2_219537583_G_A||hg19.ET-27148-3-3190-3715-3888-4599[.][29][UPT]	NDD	chr2	219537583	G	A	219537464	219537636	+	exonic.5ss	-53	0.905903	-0.0970199	exonic	STK36	.	nonsynonymous SNV	STK36:NM_001243313:exon2:c.G31A:p.G11R,STK36:NM_015690:exon2:c.G31A:p.G11R	D	D	D	D	D	H	T	D	D	D	D	D	32	1.048	1	12335.p1	Iossifov;Heyne_2018;SSC_Iossifov_2014	exome	autism;ASD	;12335	;simplex	;12335.fa	;12335.mo	;female;Female
12851.p1||1_192779402_G_A	1_192779402_G_A	12851.p1||1_192779402_G_A||hg19.ET-5997-3-3143-4127-4393-4942[.][1][UPT][DNT]	NDD	chr1	192779402	G	A	192779296	192779561	+	exonic.3ss	106	0.974987	-0.0967866	intronic	RGS2	.	.	.	.	.	.	.	.	.	.	.	.	.	.	.	.	.	.	12851.p1	Iossifov;ASC_v15_VCF	exome	autism	;12851		;SSC06302	;SSC06300	;Male
DDDP111315||15_30026586_C_T	15_30026586_C_T	DDDP111315||15_30026586_C_T||hg19.ET-7082-3-88239-91120-91229-92189[.][11]	NDD	chr15	30026586	C	T	30026478	30026586	-	exonic.3ss	0	0.968002	-0.0967447	exonic	TJP1	.	nonsynonymous SNV	TJP1:NM_001330239:exon12:c.G1408A:p.V470I,TJP1:NM_003257:exon12:c.G1408A:p.V470I,TJP1:NM_175610:exon12:c.G1408A:p.V470I,TJP1:NM_001301025:exon13:c.G1609A:p.V537I,TJP1:NM_001301026:exon13:c.G1420A:p.V474I	D	D	D	D	D	N	T	N	T	T	.	D	28.9	0.892	0.904	DDDP111315	Heyne_2018	exome	DD		simplex			male
DDDP115931||1_5967226_G_A	1_5967226_G_A	DDDP115931||1_5967226_G_A||hg19.ET-261734-3-86322-88251-88359-89690[.][4]	NDD	chr1	5967226	G	A	5967175	5967282	-	exonic.5ss	-51	0.929175	-0.0966559	exonic	NPHP4	.	synonymous SNV	NPHP4:NM_015102:exon13:c.C1560T:p.A520A	.	.	.	.	.	.	.	.	.	.	.	.	.	.	.	DDDP115931	Heyne_2018	exome	DD		simplex			male
14455.p1||22_51018177_T_C	22_51018177_T_C	14455.p1||22_51018177_T_C||hg19.ET-1120-3-9026-9169-9273-9492[.][81][UPT][DNT]	NDD	chr22	51018177	T	C	51018156	51018259	-	exonic.5ss	-21	0.903909	-0.0964001	exonic	CHKB	.	nonsynonymous SNV	CHKB:NM_005198:exon9:c.A1010G:p.D337G	T	B	B	N	D	L	T	N	T	T	T	D	16.93	1.042	0.995	14455.p1	Iossifov;ASC_v15_VCF	exome	autism	;14455		;SSC11453	;SSC11165	;Female
200675425@1082034452||10_126100537_C_T	10_126100537_C_T	200675425@1082034452||10_126100537_C_T||hg19.ET-4942-3-3104-9776-10004-13011[.][674][UPT][DNT]	NDD	chr10	126100537	C	T	126100542	126100769	-	downstream	5	0.974615	-0.0960626	intronic	OAT	.	.	.	.	.	.	.	.	.	.	.	.	.	.	.	.	.	.	200675425@1082034452	ASC_v15_VCF	exome	autism	200675425@1082034452		200675423@1082034605	200675424@1082034687	Male
645||17_40453468_C_G	17_40453468_C_G	645||17_40453468_C_G||hg19.ET-6776-3-16324-16728-16908-19795[.][14]	NDD	chr17	40453468	C	G	40453293	40453472	+	exonic.5ss	-4	0.941581	-0.0960255	exonic	STAT5A	.	nonsynonymous SNV	STAT5A:NM_001288719:exon8:c.C1075G:p.R359G,STAT5A:NM_001288718:exon9:c.C1165G:p.R389G,STAT5A:NM_001288720:exon9:c.C1165G:p.R389G,STAT5A:NM_003152:exon10:c.C1165G:p.R389G	T	B	B	D	D	L	D	N	T	D	D	D	23.2	0.74	0.925	645	Heyne_2018	exome	ID		simplex			male
Lelieveld_645||17_40453468_C_G	17_40453468_C_G	Lelieveld_645||17_40453468_C_G||hg19.ET-6776-3-16324-16728-16908-19795[.][14]	NDD	chr17	40453468	C	G	40453293	40453472	+	exonic.5ss	-4	0.941581	-0.0960255	exonic	STAT5A	.	nonsynonymous SNV	STAT5A:NM_001288719:exon8:c.C1075G:p.R359G,STAT5A:NM_001288718:exon9:c.C1165G:p.R389G,STAT5A:NM_001288720:exon9:c.C1165G:p.R389G,STAT5A:NM_003152:exon10:c.C1165G:p.R389G	T	B	B	D	D	L	D	N	T	D	D	D	23.2	0.74	0.925	Lelieveld_645	Lelieveld2016	exome	intellectualDisability
14538.p1||16_30679970_T_C	16_30679970_T_C	14538.p1||16_30679970_T_C||hg19.ET-64319-3-6166-7103-7187-7315[.][40][DNT]	NDD	chr16	30679970	T	C	30679881	30679964	+	downstream	6	0.972732	-0.0958436	intronic	FBRS	.	.	.	.	.	.	.	.	.	.	.	.	.	.	.	.	.	.	14538.p1	Iossifov;ASC_v15_VCF	exome	autism	;14538		;36809	;36811	;Male
AU238A||6_553870_T_C	6_553870_T_C	AU238A||6_553870_T_C||hg19.ET-55770-3-140883-142189-142256-146818[.][20]	NDD	chr6	553870	T	C	553854	553920	-	exonic.5ss	-16	0.979008	-0.0955791	exonic	EXOC2	.	nonsynonymous SNV	EXOC2:NM_018303:exon21:c.A2105G:p.D702G	T	B	B	D	D	L	T	N	T	T	T	D	18.78	1.011	0.999	AU238A	DeRubeis2014;ASC_v15_VCF	exome	autism	;AU238A		;AU238B	;AU238C	;Male
1184-1||11_14854346_C_T	11_14854346_C_T	1184-1||11_14854346_C_T||hg19.ET-5140-3-191055-191999-192111-194259[.][9]	NDD	chr11	14854346	C	T	14854268	14854379	+	exonic.5ss	-33	0.904494	-0.0954509	exonic	PDE3B	.	nonsynonymous SNV	PDE3B:NM_000922:exon10:c.C2173T:p.R725C	T	B	B	N	D	M	T	D	T	T	D	D	23	0.022	0.999	1184-1	Fromer2014	exome	schizophrenia
723|Lelieveld_723||6_112479935_T_C	6_112479935_T_C	723|Lelieveld_723||6_112479935_T_C||hg19.ET-3910-3-92556-98835-98984-102009[.][16]	NDD	chr6	112479935	T	C	112479934	112480082	-	exonic.5ss	-1	0.971202	-0.094504	exonic	LAMA4	.	nonsynonymous SNV	LAMA4:NM_001105206:exon14:c.A1816G:p.R606G,LAMA4:NM_001105207:exon14:c.A1795G:p.R599G,LAMA4:NM_002290:exon14:c.A1795G:p.R599G	T	B	B	N	D	L	T	N	T	T	T	D	12.6	1.011	0.936	723|Lelieveld_723	Heyne_2018;Lelieveld2016	exome	ID;intellectualDisability		simplex;			male;
12219.p1||X_2793922_G_C	X_2793922_G_C	12219.p1||X_2793922_G_C||hg19.ET-8908-3-35901-49988-50093-51378[.][8][DNT]	NDD	chrX	2793922	G	C	2793851	2793955	+	exonic.5ss	-33	0.378671	-0.0944953	exonic	GYG2	.	nonsynonymous SNV	GYG2:NM_001079855:exon9:c.G1110C:p.Q370H,GYG2:NM_001184702:exon9:c.G1110C:p.Q370H,GYG2:NM_003918:exon10:c.G1203C:p.Q401H	T	P	B	N	N	L	T	N	T	T	T	N	10.5	0	0.05	12219.p1	Iossifov;SSC_Iossifov_2014	exome	autism	;12219		;12219.fa	;12219.mo	;Male
535||8_28932825_C_T	8_28932825_C_T	535||8_28932825_C_T||hg19.ET-23303-3-173349-190750-190813-193777[.][11]	NDD	chr8	28932825	C	T	28932798	28932860	-	exonic.5ss	-27	0.495725	-0.0940286	exonic	KIF13B	.	synonymous SNV	KIF13B:NM_015254:exon38:c.G4494A:p.P1498P	.	.	.	.	.	.	.	.	.	.	.	.	.	.	.	535	Heyne_2018	exome	ID		simplex			male
Lelieveld_535||8_28932825_C_T	8_28932825_C_T	Lelieveld_535||8_28932825_C_T||hg19.ET-23303-3-173349-190750-190813-193777[.][11]	NDD	chr8	28932825	C	T	28932798	28932860	-	exonic.5ss	-27	0.495725	-0.0940286	exonic	KIF13B	.	synonymous SNV	KIF13B:NM_015254:exon38:c.G4494A:p.P1498P	.	.	.	.	.	.	.	.	.	.	.	.	.	.	.	Lelieveld_535	Lelieveld2016	exome	intellectualDisability
283|Lelieveld_283||5_111594965_G_T	5_111594965_G_T	283|Lelieveld_283||5_111594965_G_T||hg19.ET-64097-3-162423-163021-163085-181503[.][9]	NDD	chr5	111594965	G	T	111594926	111594989	-	exonic.3ss	24	0.902553	-0.0937482	exonic	EPB41L4A	.	nonsynonymous SNV	EPB41L4A:NM_001347887:exon9:c.C756A:p.F252L,EPB41L4A:NM_022140:exon9:c.C756A:p.F252L	D	D	D	D	D	M	D	D	D	D	D	D	27.4	0.142	1	283|Lelieveld_283	Heyne_2018;Lelieveld2016	exome	ID;intellectualDisability		simplex;			male;
14016.p1||6_160445739_A_G	6_160445739_A_G	14016.p1||6_160445739_A_G||hg19.ET-3482-3-44687-58473-58606-61086[.][8]	NDD	chr6	160445739	A	G	160445604	160445736	+	downstream	3	0.976549	-0.0930137	intronic	IGF2R	.	.	.	.	.	.	.	.	.	.	.	.	.	.	.	.	.	.	14016.p1	Iossifov;ASC_v15_VCF	exome	autism	;14016		;35996	;35998	;Male
12011.p1||3_159604035_C_T	3_159604035_C_T	12011.p1||3_159604035_C_T||hg19.ET-29970-3-800030-819955-820073-821456[.][92][DNT]	NDD	chr3	159604035	C	T	159603996	159604113	+	exonic.3ss	39	0.955221	-0.0925953	exonic	IQCJ-SCHIP1;SCHIP1	.	synonymous SNV	SCHIP1:NM_001197108:exon3:c.C222T:p.N74N,SCHIP1:NM_001197109:exon3:c.C189T:p.N63N,SCHIP1:NM_001197107:exon4:c.C879T:p.N293N,SCHIP1:NM_014575:exon4:c.C918T:p.N306N,IQCJ-SCHIP1:NM_001197114:exon6:c.C1065T:p.N355N,IQCJ-SCHIP1:NM_001197113:exon7:c.C1146T:p.N382N	.	.	.	.	.	.	.	.	.	.	.	.	.	.	.	12011.p1	Iossifov;ASC_v15_VCF	exome	autism	;12011		;5842	;5874	;Male
DDDP117752||17_31348237_C_G	17_31348237_C_G	DDDP117752||17_31348237_C_G||hg19.ET-40-3-1135947-1138497-1138589-1142123[.][13]	NDD	chr17	31348237	C	G	31348237	31348328	-	exonic.5ss	0	0.984955	-0.0922793	exonic	ASIC2	.	nonsynonymous SNV	ASIC2:NM_001094:exon7:c.G1288C:p.G430R,ASIC2:NM_183377:exon7:c.G1441C:p.G481R	D	D	D	D	D	M	T	D	D	D	D	D	28.9	0.931	0.994	DDDP117752	Heyne_2018	exome	DD		simplex			female
DDDP107075||8_144463509_C_T	8_144463509_C_T	DDDP107075||8_144463509_C_T||hg19.ET-114822-3-14929-15413-15490-15717[.][13][UPT]	NDD	chr8	144463509	C	T	144463438	144463514	+	exonic.5ss	-5	0.88221	-0.0921005	exonic	RHPN1	.	nonsynonymous SNV	RHPN1:NM_052924:exon12:c.C1483T:p.R495W	D	D	D	U	D	M	T	D	T	T	D	D	34	0.932	0.997	DDDP107075	Heyne_2018	exome	DD		simplex			male
CC1043.201||8_54727218_T_C	8_54727218_T_C	CC1043.201||8_54727218_T_C||hg19.ET-51606-3-28895-31545-31650-35094[.][58][UPT]	NDD	chr8	54727218	T	C	54727222	54727326	-	downstream	4	0.984418	-0.0920133	intronic	ATP6V1H	.	.	.	.	.	.	.	.	.	.	.	.	.	.	.	.	.	.	CC1043.201	ASC_v15_VCF	exome	autism	CC1043		CC1043.102	CC1043.101	Male
200675411@1082034626||15_67923215_T_A	15_67923215_T_A	200675411@1082034626||15_67923215_T_A||hg19.ET-5607-3-61067-91205-91245-106548[.][28][DNT]	NDD	chr15	67923215	T	A	67923226	67923265	+	upstream	-11	0.983527	-0.0920089	intronic	MAP2K5	.	.	.	.	.	.	.	.	.	.	.	.	.	.	.	.	.	.	200675411@1082034626	ASC_v15_VCF	exome	autism	200675411@1082034626		200675409@1082034421	200675410@1082034601	Male
14064.p1||2_112725700_T_G	2_112725700_T_G	14064.p1||2_112725700_T_G||hg19.ET-10461-3-69664-72523-72639-79675[.][9]	NDD	chr2	112725700	T	G	112725714	112725829	+	upstream	-14	0.967504	-0.0911091	intronic	MERTK	.	.	.	.	.	.	.	.	.	.	.	.	.	.	.	.	.	.	14064.p1	Iossifov	exome	autism
DDDP113358||11_94349670_G_A	11_94349670_G_A	DDDP113358||11_94349670_G_A||hg19.ET-143689-3-44379-52185-52256-53646[.][7][DNT]	NDD	chr11	94349670	G	A	94349659	94349729	+	exonic.3ss	11	0.942342	-0.0901708	exonic	PIWIL4	.	nonsynonymous SNV	PIWIL4:NM_152431:exon16:c.G1955A:p.R652H	D	B	B	D	D	L	T	N	T	T	T	D	26.9	0.998	0.997	DDDP113358	Heyne_2018	exome	DD		simplex			male
11412.p1||3_179092998_C_G	3_179092998_C_G	11412.p1||3_179092998_C_G||hg19.ET-55669-3-23412-30528-30650-32350[.][21][DNT]	NDD	chr3	179092998	C	G	179093008	179093129	+	upstream	-10	0.851031	-0.0900813	intronic	MFN1	.	.	.	.	.	.	.	.	.	.	.	.	.	.	.	.	.	.	11412.p1	ASC_v15_VCF	exome	autism	11412		SSC00635	SSC00634	Male
DDDP103409||X_153197551_T_G	X_153197551_T_G	DDDP103409||X_153197551_T_G||hg19.ET-8260-3-5839-6039-6084-7307[.][145][UPT][DNT]	NDD	chrX	153197551	T	G	153197524	153197568	-	exonic.3ss	17	0.926636	-0.0896291	exonic	NAA10	.	nonsynonymous SNV	NAA10:NM_001256120:exon6:c.A341C:p.H114P,NAA10:NM_003491:exon6:c.A359C:p.H120P	D	P	D	D	D	L	T	D	T	T	D	D	26	0.964	0.999	DDDP103409	Heyne_2018	exome	DD		simplex			female
13641.p1||7_105108895_G_A	7_105108895_G_A	13641.p1||7_105108895_G_A||hg19.ET-54517-3-54551-56775-56902-59824[.][19][UPT]	NDD	chr7	105108895	G	A	105108784	105108910	-	exonic.3ss	15	0.968448	-0.0888428	exonic	PUS7	.	nonsynonymous SNV	PUS7:NM_001318163:exon12:c.C1432T:p.R478C,PUS7:NM_001318164:exon12:c.C1414T:p.R472C,PUS7:NM_019042:exon12:c.C1414T:p.R472C	D	D	D	D	D	H	T	D	D	T	D	D	35	0.972	1	13641.p1	Iossifov;ASC_v15_VCF	exome	autism	;13641		;13641.fa	;13641.mo	;Male
12378.p1||12_62931917_T_G	12_62931917_T_G	12378.p1||12_62931917_T_G||hg19.ET-23041-3-73890-74279-74360-74435[.][13][UPT]	NDD	chr12	62931917	T	G	62931876	62931956	+	exonic.5ss	-39	0.976892	-0.0883131	exonic	MON2	.	synonymous SNV	MON2:NM_001278469:exon17:c.T2160G:p.G720G,MON2:NM_001278470:exon17:c.T2160G:p.G720G,MON2:NM_001278471:exon17:c.T2091G:p.G697G,MON2:NM_015026:exon17:c.T2160G:p.G720G,MON2:NM_001278472:exon18:c.T1944G:p.G648G	.	.	.	.	.	.	.	.	.	.	.	.	.	.	.	12378.p1	ASC_v15_VCF	exome	autism	12378		4957	4989	Female
DEASD_0108_001||22_39441002_C_T	22_39441002_C_T	DEASD_0108_001||22_39441002_C_T||hg19.ET-200316-3-5423-7273-7553-7760[.][15][UPT][DNT]	NDD	chr22	39441002	C	T	39440946	39441225	+	exonic.3ss	56	0.202582	-0.0879401	exonic	APOBEC3F	.	synonymous SNV	APOBEC3F:NM_145298:exon3:c.C228T:p.G76G	.	.	.	.	.	.	.	.	.	.	.	.	.	.	.	DEASD_0108_001	ASC_v15_VCF	exome	autism	DEASD_0108_001		DEASD_0108_500	DEASD_0108_600	Male
G01-GEA-225-HI||3_18435955_T_C	3_18435955_T_C	G01-GEA-225-HI||3_18435955_T_C||hg19.ET-6304-3-44595-46857-47312-55162[.][11]	NDD	chr3	18435955	T	C	18435954	18436408	-	exonic.5ss	-1	0.979641	-0.0877536	exonic	SATB1	.	nonsynonymous SNV	SATB1:NM_001322876:exon6:c.A989G:p.Q330R,SATB1:NM_001131010:exon7:c.A1205G:p.Q402R,SATB1:NM_001195470:exon7:c.A1205G:p.Q402R,SATB1:NM_001322871:exon7:c.A1205G:p.Q402R,SATB1:NM_001322873:exon7:c.A1205G:p.Q402R,SATB1:NM_001322874:exon7:c.A1205G:p.Q402R,SATB1:NM_001322875:exon7:c.A1205G:p.Q402R,SATB1:NM_002971:exon7:c.A1205G:p.Q402R,SATB1:NM_001322872:exon8:c.A1205G:p.Q402R	D	D	D	D	D	M	T	N	T	T	D	D	25.8	1.061	1	G01-GEA-225-HI	ASC_v15_VCF	exome	autism	G01-GEA-225-HI		G01-GEA-225-PA	G01-GEA-225-MA	Female
11959.p1||19_35829116_T_G	19_35829116_T_G	11959.p1||19_35829116_T_G||hg19.ET-933-3-11853-11999-12263-14712[.][26][DNT]	NDD	chr19	35829116	T	G	35829071	35829334	+	exonic.3ss	45	0.730154	-0.0877302	exonic	CD22	.	nonsynonymous SNV	CD22:NM_001278417:exon5:c.T515G:p.V172G,CD22:NM_001185100:exon6:c.T1031G:p.V344G,CD22:NM_001771:exon6:c.T1031G:p.V344G	T	B	B	N	N	L	T	N	T	T	D	N	0.004	-0.771	0	11959.p1	ASC_v15_VCF	exome	autism	11959		5837	5869	Male
11459.p1||11_33049217_A_G	11_33049217_A_G	11459.p1||11_33049217_A_G||hg19.ET-91614-3-13186-14822-14950-15739[.][13]	NDD	chr11	33049217	A	G	33049232	33049359	+	upstream	-15	0.918036	-0.087007	intronic	DEPDC7	.	.	.	.	.	.	.	.	.	.	.	.	.	.	.	.	.	.	11459.p1	Iossifov;SSC_Iossifov_2014	exome	autism	;11459		;11459.fa	;11459.mo	;Male
DDDP114232||16_87790008_T_C	16_87790008_T_C	DDDP114232||16_87790008_T_C||hg19.ET-54758-3-7044-12515-12594-13700[.][111][UPT][DNT]	NDD	chr16	87790008	T	C	87790005	87790083	-	exonic.5ss	-3	0.897308	-0.0860671	exonic	KLHDC4	.	synonymous SNV	KLHDC4:NM_001184856:exon3:c.A267G:p.Q89Q,KLHDC4:NM_017566:exon3:c.A267G:p.Q89Q	.	.	.	.	.	.	.	.	.	.	.	.	.	.	.	DDDP114232	Heyne_2018	exome	DD		simplex			male
12087.p1||2_97860565_T_C	2_97860565_T_C	12087.p1||2_97860565_T_C||hg19.ET-375248-3-84259-84349-84422-86097[.][10]	NDD	chr2	97860565	T	C	97860582	97860654	+	upstream	-17	0.52049	-0.0855604	intronic	ANKRD36	.	.	.	.	.	.	.	.	.	.	.	.	.	.	.	.	.	.	12087.p1	Iossifov;ASC_v15_VCF	exome	autism	;12087		;SSC03853	;SSC03848	;Male
DDDP104795||18_71797790_C_A	18_71797790_C_A	DDDP104795||18_71797790_C_A||hg19.ET-201456-3-15104-20207-20450-21251[.][17]	NDD	chr18	71797790	C	A	71797651	71797893	-	exonic.3ss	103	0.88996	-0.0848574	exonic	FBXO15	.	nonsynonymous SNV	FBXO15:NM_001142958:exon4:c.G436T:p.V146F,FBXO15:NM_152676:exon4:c.G208T:p.V70F	T	B	B	N	N	M	T	D	T	T	T	N	22.6	0.935	0.972	DDDP104795	Heyne_2018	exome	DD		simplex			male
557-04-100868||10_118460640_C_A	10_118460640_C_A	557-04-100868||10_118460640_C_A||hg19.ET-259217-3-40424-44445-44632-46835[.][12][DNT]	NDD	chr10	118460640	C	A	118460454	118460640	-	exonic.3ss	0	0.9704	-0.0847541	exonic	HSPA12A	.	nonsynonymous SNV	HSPA12A:NM_025015:exon4:c.G255T:p.R85S,HSPA12A:NM_001330164:exon5:c.G306T:p.R102S	D	B	B	N	D	L	T	D	T	T	.	D	23	0.07	0.997	557-04-100868	ASC_v15_VCF	exome	autism	557-04-100868		554-04-100613	553-04-100612	Male
4261-1||10_114154676_G_A	10_114154676_G_A	4261-1||10_114154676_G_A||hg19.ET-51703-3-5291-23760-23945-27743[.][154][UPT][DNT]	NDD	chr10	114154676	G	A	114154676	114154860	+	exonic.3ss	0	0.983256	-0.0845212	exonic	ACSL5	.	nonsynonymous SNV	ACSL5:NM_016234:exon2:c.G140A:p.G47D	T	D	D	N	D	.	T	N	T	T	D	D	23.7	1.048	1	4261-1	Fromer2014	exome	schizophrenia
12324.p1||6_42905450_T_A	6_42905450_T_A	12324.p1||6_42905450_T_A||hg19.ET-10695-3-9549-11595-11718-11968[.][113][DNT]	NDD	chr6	42905450	T	A	42905455	42905577	+	upstream	-5	0.981185	-0.0844971	intronic	CNPY3;CNPY3-GNMT	.	.	.	.	.	.	.	.	.	.	.	.	.	.	.	.	.	.	12324.p1	Iossifov;ASC_v15_VCF	exome	autism	;12324		;68681	;68683	;Male
80001104520-31||9_133799131_C_T	9_133799131_C_T	80001104520-31||9_133799131_C_T||hg19.ET-84929-3-17832-18188-18325-30180[.][10]	NDD	chr9	133799131	C	T	133799131	133799267	-	exonic.5ss	0	0.972465	-0.0843462	exonic	FIBCD1	.	synonymous SNV	FIBCD1:NM_032843:exon4:c.G849A:p.T283T,FIBCD1:NM_001145106:exon5:c.G849A:p.T283T	.	.	.	.	.	.	.	.	.	.	.	.	.	.	.	80001104520-31	ASC_v15_VCF	exome	autism	80001104520-31		80001104520-2	80001104520-1	Male
DDDP104365||1_79095472_C_T	1_79095472_C_T	DDDP104365||1_79095472_C_T||hg19.ET-10964-3-11597-12317-12513-17934[.][30][DNT]	NDD	chr1	79095472	C	T	79095405	79095600	+	exonic.3ss	67	0.725289	-0.0840396	exonic	IFI44L	.	nonsynonymous SNV	IFI44L:NM_006820:exon4:c.C595T:p.R199C	D	P	B	N	D	L	T	D	T	T	T	D	23.6	0.762	0.039	DDDP104365	Heyne_2018	exome	DD		simplex			female
11134.p1||12_39726737_G_A	12_39726737_G_A	11134.p1||12_39726737_G_A||hg19.ET-55605-3-113179-113283-113498-113646[.][16][UPT]	NDD	chr12	39726737	G	A	39726695	39726909	-	exonic.5ss	-42	0.977484	-0.083753	exonic	KIF21A	.	nonsynonymous SNV	KIF21A:NM_001173465:exon17:c.C2552T:p.A851V,KIF21A:NM_001173463:exon18:c.C2621T:p.A874V,KIF21A:NM_017641:exon18:c.C2621T:p.A874V,KIF21A:NM_001173464:exon19:c.C2660T:p.A887V	T	P	B	D	D	N	T	N	T	T	D	D	19.11	1.048	0.991	11134.p1	Iossifov;ASC_v15_VCF	exome	autism	;11134		;70200	;70232	;Male
3F899||9_2104169_G_C	9_2104169_G_C	3F899||9_2104169_G_C||hg19.ET-6595-3-89275-91661-91828-97912[.][25][UPT]	NDD	chr9	2104169	G	C	2104003	2104169	+	exonic.5ss	0	0.985161	-0.0834825	exonic	SMARCA2	.	nonsynonymous SNV	SMARCA2:NM_001289396:exon23:c.G3292C:p.G1098R,SMARCA2:NM_001289397:exon23:c.G3118C:p.G1040R,SMARCA2:NM_003070:exon23:c.G3292C:p.G1098R,SMARCA2:NM_139045:exon23:c.G3292C:p.G1098R	D	D	D	D	D	H	D	D	D	D	.	D	31	1.048	0.986	3F899	ASC_v15_VCF	exome	autism	3F899		4G110	4G109	Male
DDDP100198||10_20453456_C_T	10_20453456_C_T	DDDP100198||10_20453456_C_T||hg19.ET-84898-3-334460-351025-351125-363556[.][12]	NDD	chr10	20453456	C	T	20453397	20453496	+	exonic.5ss	-40	0.962304	-0.0833888	exonic	PLXDC2	.	synonymous SNV	PLXDC2:NM_001282736:exon6:c.C696T:p.S232S,PLXDC2:NM_032812:exon7:c.C843T:p.S281S	.	.	.	.	.	.	.	.	.	.	.	.	.	.	.	DDDP100198	Heyne_2018	exome	DD		simplex			male
NDAR_INVNE346GDX_wes1||19_8555643_G_T	19_8555643_G_T	NDAR_INVNE346GDX_wes1||19_8555643_G_T||hg19.ET-84106-3-14768-14898-15061-15145[.][8]	NDD	chr19	8555643	G	T	8555478	8555640	-	upstream	-3	0.902652	-0.0829583	intronic	PRAM1	.	.	.	.	.	.	.	.	.	.	.	.	.	.	.	.	.	.	NDAR_INVNE346GDX_wes1	De_Rubeis_Nature_2014	exome	autism	NDAR_INVNE346GDX_wes1		NDAR_INVEX268JT4_wes1	NDAR_INVZM428RZ8_wes1	Male
12497.p1||5_148422396_G_A	5_148422396_G_A	12497.p1||5_148422396_G_A||hg19.ET-79628-3-21642-23337-23481-24557[.][9]	NDD	chr5	148422396	G	A	148422257	148422400	-	exonic.3ss	4	0.902656	-0.0825337	exonic	SH3TC2	.	synonymous SNV	SH3TC2:NM_024577:exon5:c.C390T:p.Y130Y	.	.	.	.	.	.	.	.	.	.	.	.	.	.	.	12497.p1	Iossifov;Heyne_2018;ASC_v15_VCF	exome	autism;ASD	;12497	;simplex	;SSC06443	;SSC06437	;male;Male
13306.p1||10_15634273_G_A	10_15634273_G_A	13306.p1||10_15634273_G_A||hg19.ET-8516-3-125565-130467-130547-136107[.][3]	NDD	chr10	15634273	G	A	15634224	15634303	-	exonic.3ss	30	0.983438	-0.08246	exonic	ITGA8	.	nonsynonymous SNV	ITGA8:NM_001291494:exon21:c.C2197T:p.R733C,ITGA8:NM_003638:exon22:c.C2242T:p.R748C	D	D	D	D	D	M	T	D	T	T	D	D	35	1.048	0.998	13306.p1	Iossifov;ASC_v15_VCF	exome	autism	;13306		;68745	;68747	;Male
12032.p1||1_32790137_C_T	1_32790137_C_T	12032.p1||1_32790137_C_T||hg19.ET-3065-3-27676-35372-35447-37832[.][270][UPT][DNT]	NDD	chr1	32790137	C	T	32790080	32790154	+	exonic.5ss	-17	0.978621	-0.0821234	exonic	HDAC1	.	nonsynonymous SNV	HDAC1:NM_004964:exon4:c.C338T:p.S113F	T	P	P	D	D	M	T	D	D	D	D	D	34	0.852	1	12032.p1	Iossifov;ASC_v15_VCF	exome	autism	;12032		;SSC03834	;SSC03830	;Male
08C72821||8_139380265_T_C	8_139380265_T_C	08C72821||8_139380265_T_C||hg19.ET-51059-3-3152-131820-131916-188902[.][4][UPT]	NDD	chr8	139380265	T	C	139380150	139380245	-	upstream	-20	0.962286	-0.0820453	intronic	FAM135B	.	.	.	.	.	.	.	.	.	.	.	.	.	.	.	.	.	.	08C72821	ASC_v15_VCF	exome	autism	08C72821		08C72847	08C72822	Male
G01-GEA-34-HI||11_63403036_T_A	11_63403036_T_A	G01-GEA-34-HI||11_63403036_T_A||hg19.ET-25923-3-38405-39021-39078-41514[.][17]	NDD	chr11	63403036	T	A	63403006	63403062	-	exonic.3ss	26	0.963706	-0.0815733	exonic	ATL3	.	nonsynonymous SNV	ATL3:NM_001290048:exon10:c.A951T:p.E317D,ATL3:NM_015459:exon10:c.A1005T:p.E335D	T	B	B	D	D	L	T	N	T	T	D	D	23.8	1.061	1	G01-GEA-34-HI	ASC_v15_VCF	exome	autism	G01-GEA-34-HI		G01-GEA-34-PA	G01-GEA-34-MA	Male
25280.p1||1_27099118_C_T	1_27099118_C_T	25280.p1||1_27099118_C_T||hg19.ET-8289-3-78296-79469-79602-79781[.][21][UPT]	NDD	chr1	27099118	C	T	27098991	27099123	+	exonic.5ss	-5	0.979955	-0.081197	exonic	ARID1A	.	synonymous SNV	ARID1A:NM_006015:exon13:c.C3534T:p.G1178G,ARID1A:NM_139135:exon13:c.C3534T:p.G1178G	.	.	.	.	.	.	.	.	.	.	.	.	.	.	.	25280.p1	Willsey2017	exome	tourette_syndrome
3A550||8_51503450_C_T	8_51503450_C_T	3A550||8_51503450_C_T||hg19.ET-54212-3-644143-681842-681881-747872[.][7]	NDD	chr8	51503450	C	T	51503439	51503477	+	exonic.3ss	11	0.949084	-0.0809358	exonic	SNTG1	.	synonymous SNV	SNTG1:NM_001287814:exon12:c.C822T:p.I274I,SNTG1:NM_001321773:exon12:c.C822T:p.I274I,SNTG1:NM_001321777:exon12:c.C822T:p.I274I,SNTG1:NM_001321776:exon13:c.C822T:p.I274I,SNTG1:NM_001321778:exon13:c.C822T:p.I274I,SNTG1:NM_018967:exon13:c.C822T:p.I274I,SNTG1:NM_001287813:exon14:c.C822T:p.I274I,SNTG1:NM_001321775:exon14:c.C822T:p.I274I	.	.	.	.	.	.	.	.	.	.	.	.	.	.	.	3A550	ASC_v15_VCF	exome	autism	3A550		4B866	4B865	Male
dn||10_63964649_T_C	10_63964649_T_C	dn||10_63964649_T_C||hg19.ET-219790-3-66041-66685-66851-71846[.][3][UPT]	NDD	chr10	63964649	T	C	63964616	63964781	-	exonic.5ss	-33	0.959069	-0.0805965	exonic	RTKN2	.	nonsynonymous SNV	RTKN2:NM_145307:exon10:c.A1153G:p.M385V	T	B	B	D	D	M	T	D	T	T	D	D	22.8	1.061	1	dn	Heyne_2018	exome	EE		simplex			male
13455.p1||11_103026257_A_G	11_103026257_A_G	13455.p1||11_103026257_A_G||hg19.ET-79659-3-48379-48900-49071-49957[.][4]	NDD	chr11	103026257	A	G	103026060	103026230	+	downstream	27	0.97742	-0.0797485	intronic	DYNC2H1	.	.	.	.	.	.	.	.	.	.	.	.	.	.	.	.	.	.	13455.p1	ASC_v15_VCF	exome	autism	13455		13455.fa	13455.mo	Female
09C81997||19_8651425_C_T	19_8651425_C_T	09C81997||19_8651425_C_T||hg19.ET-81794-3-26889-26983-27147-27234[.][9]	NDD	chr19	8651425	C	T	8651442	8651605	-	downstream	17	0.976183	-0.0797393	intronic	ADAMTS10	.	.	.	.	.	.	.	.	.	.	.	.	.	.	.	.	.	.	09C81997	ASC_v15_VCF	exome	autism	09C81997		09C81992	09C81995	Male
MAE15||7_36456770_C_T	7_36456770_C_T	MAE15||7_36456770_C_T||hg19.ET-54443-3-29062-30257-30352-32421[.][1]	NDD	chr7	36456770	C	T	36456689	36456783	+	exonic.5ss	-13	0.407013	-0.0796508	exonic	ANLN	.	nonsynonymous SNV	ANLN:NM_018685:exon9:c.C1604T:p.T535I	T	B	B	N	N	L	T	N	T	T	T	N	18.81	0.892	0.982	MAE15	Heyne_2018	exome	EE		simplex			male
AU0243-0201||12_123087169_G_T	12_123087169_G_T	AU0243-0201||12_123087169_G_T||hg19.ET-9735-3-77364-78307-78479-78567[.][11][DNT]	NDD	chr12	123087169	G	T	123087116	123087287	+	exonic.3ss	53	0.966994	-0.0794505	exonic	KNTC1	.	synonymous SNV	KNTC1:NM_014708:exon46:c.G4707T:p.V1569V	.	.	.	.	.	.	.	.	.	.	.	.	.	.	.	AU0243-0201	ASC_v15_VCF	exome	autism	AU0243-0201		AU0243-0101	AU0243-0102	Male
DDDP115100||12_57594913_A_G	12_57594913_A_G	DDDP115100||12_57594913_A_G||hg19.ET-4035-3-75317-75535-75655-75998[.][33]	NDD	chr12	57594913	A	G	57594817	57594936	+	exonic.5ss	-23	0.975302	-0.0791529	exonic	LRP1	.	nonsynonymous SNV	LRP1:NM_002332:exon65:c.A10322G:p.D3441G	T	P	B	N	D	M	D	D	D	D	D	D	25.9	1.184	0.989	DDDP115100	Heyne_2018	exome	DD		simplex			male
GAU0046C||13_20411805_T_C	13_20411805_T_C	GAU0046C||13_20411805_T_C||hg19.ET-9205-3-27937-28815-28981-30947[.][8]	NDD	chr13	20411805	T	C	20411796	20411961	-	exonic.5ss	-9	0.6553	-0.0788004	exonic	ZMYM5	.	synonymous SNV	ZMYM5:NM_001039650:exon6:c.A1029G:p.K343K,ZMYM5:NM_001142684:exon6:c.A1029G:p.K343K	.	.	.	.	.	.	.	.	.	.	.	.	.	.	.	GAU0046C	ASC_v15_VCF	exome	autism	GAU0046C		GAU0046B	GAU0046A	Male
DDDP111096||18_13071096_G_A	18_13071096_G_A	DDDP111096||18_13071096_G_A||hg19.ET-55125-3-81495-82677-82851-84393[.][16][UPT]	NDD	chr18	13071096	G	A	13071038	13071211	+	exonic.3ss	58	0.954199	-0.0786176	exonic	CEP192	.	nonsynonymous SNV	CEP192:NM_032142:exon28:c.G5233A:p.E1745K	D	D	P	D	D	M	T	N	T	T	D	D	28.5	0.05	0.991	DDDP111096	Heyne_2018	exome	DD		simplex			male
14517.p1||3_132247145_C_T	3_132247145_C_T	14517.p1||3_132247145_C_T||hg19.ET-23317-3-111573-113480-113624-116289[.][27][UPT][DNT]	NDD	chr3	132247145	C	T	132247033	132247176	+	exonic.5ss	-31	0.979112	-0.0785599	exonic	DNAJC13	.	nonsynonymous SNV	DNAJC13:NM_015268:exon54:c.C6494T:p.A2165V,DNAJC13:NM_001329126:exon55:c.C6509T:p.A2170V	D	B	B	D	D	M	T	D	T	T	T	D	25.8	0.892	1	14517.p1	Iossifov;ASC_v15_VCF	exome	autism	;14517		;36753	;36755	;Male
08C75361||2_166900346_T_C	2_166900346_T_C	08C75361||2_166900346_T_C||hg19.ET-6323-3-107090-108083-108380-109708[.][2]	NDD	chr2	166900346	T	C	166900263	166900559	-	exonic.5ss	-83	0.588661	-0.078435	exonic	SCN1A	.	nonsynonymous SNV	SCN1A:NM_001165963:exon11:c.A1876G:p.S626G,SCN1A:NM_001165964:exon11:c.A1876G:p.S626G,SCN1A:NM_006920:exon11:c.A1876G:p.S626G,SCN1A:NM_001202435:exon13:c.A1876G:p.S626G	T	D	B	N	D	M	D	D	D	D	D	D	16.09	1.061	1	08C75361	ASC_v15_VCF	exome	autism	08C75361		08C75360	08C75359	Male
DDDP117335||1_67852344_C_T	1_67852344_C_T	DDDP117335||1_67852344_C_T||hg19.ET-3595-3-75760-82215-82306-85665[.][10][UPT]	NDD	chr1	67852344	C	T	67852262	67852352	+	exonic.5ss	-8	0.889801	-0.0783221	exonic	IL12RB2	.	synonymous SNV	IL12RB2:NM_001258215:exon12:c.C1680T:p.F560F,IL12RB2:NM_001559:exon14:c.C1938T:p.F646F,IL12RB2:NM_001258214:exon15:c.C1938T:p.F646F,IL12RB2:NM_001319233:exon15:c.C1938T:p.F646F	.	.	.	.	.	.	.	.	.	.	.	.	.	.	.	DDDP117335	Heyne_2018	exome	DD		simplex			male
DDDP102731||3_197585708_C_T	3_197585708_C_T	DDDP102731||3_197585708_C_T||hg19.ET-84859-3-66172-70560-70632-77149[.][11][UPT]	NDD	chr3	197585708	C	T	197585705	197585776	+	exonic.3ss	3	0.865444	-0.0781785	exonic	LRCH3	.	synonymous SNV	LRCH3:NM_032773:exon15:c.C1648T:p.L550L	.	.	.	.	.	.	.	.	.	.	.	.	.	.	.	DDDP102731	Heyne_2018	exome	DD		simplex			male
NDAR_INVYT700VBQ_wes1||16_58220787_T_C	16_58220787_T_C	NDAR_INVYT700VBQ_wes1||16_58220787_T_C||hg19.ET-1459-3-4146-14022-14124-16568[.][26][UPT]	NDD	chr16	58220787	T	C	58220659	58220760	-	upstream	-27	0.940899	-0.076638	intronic	CSNK2A2	.	.	.	.	.	.	.	.	.	.	.	.	.	.	.	.	.	.	NDAR_INVYT700VBQ_wes1	De_Rubeis_Nature_2014	exome	autism	NDAR_INVYT700VBQ_wes1		NDAR_INVYK913EN2_wes1	NDAR_INVKX556NA7_wes1	Male
F10297-1||4_3146895_C_G	4_3146895_C_G	F10297-1||4_3146895_C_G||hg19.ET-3064-3-71206-73471-73548-75116[.][3]	NDD	chr4	3146895	C	G	3146879	3146955	+	exonic.3ss	16	0.978533	-0.0766158	exonic	HTT	.	nonsynonymous SNV	HTT:NM_002111:exon24:c.C3083G:p.A1028G	D	D	D	D	D	M	T	D	T	T	D	D	33	0.852	0.991	F10297-1	ASC_v15_VCF	exome	autism	F10297-1		F10297-3	F10297-2	Male
14391.p1||14_51245480_T_C	14_51245480_T_C	14391.p1||14_51245480_T_C||hg19.ET-51199-3-41410-55317-55357-56982[.][16][UPT]	NDD	chr14	51245480	T	C	51245483	51245522	-	downstream	3	0.983906	-0.0763521	intronic	NIN	.	.	.	.	.	.	.	.	.	.	.	.	.	.	.	.	.	.	14391.p1	SSC_Iossifov_2014	exome	autism	14391		14391.fa	14391.mo	Male
DDDP116725||4_159627433_G_A	4_159627433_G_A	DDDP116725||4_159627433_G_A||hg19.ET-2110-3-34467-37064-37247-37504[.][17]	NDD	chr4	159627433	G	A	159627341	159627523	+	exonic.5ss	-90	0.974875	-0.0761246	exonic	ETFDH	.	nonsynonymous SNV	ETFDH:NM_001281738:exon9:c.G1195A:p.G399R,ETFDH:NM_001281737:exon10:c.G1237A:p.G413R,ETFDH:NM_004453:exon11:c.G1378A:p.G460R	T	P	B	N	N	N	D	N	T	D	D	D	18.54	0.998	0.022	DDDP116725	Heyne_2018	exome	DD		simplex			male
G01-GEA-317-HI||2_47693770_C_G	2_47693770_C_G	G01-GEA-317-HI||2_47693770_C_G||hg19.ET-4436-3-63088-66591-66742-70898[.][34][UPT][DNT]	NDD	chr2	47693770	C	G	47693797	47693947	+	upstream	-27	0.976578	-0.0760048	intronic	MSH2	.	.	.	.	.	.	.	.	.	.	.	.	.	.	.	.	.	.	G01-GEA-317-HI	ASC_v15_VCF	exome	autism	G01-GEA-317-HI		G01-GEA-317-PA	G01-GEA-317-MA	Male
11169.p1||7_128622321_G_A	7_128622321_G_A	11169.p1||7_128622321_G_A||hg19.ET-23534-3-74006-75849-75926-78142[.][44][DNT]	NDD	chr7	128622321	G	A	128622302	128622378	-	exonic.5ss	-19	0.982303	-0.0757823	exonic	TNPO3	.	nonsynonymous SNV	TNPO3:NM_001191028:exon13:c.C1648T:p.R550C,TNPO3:NM_012470:exon14:c.C1840T:p.R614C	D	D	P	D	D	M	T	D	D	D	D	D	28.3	0.143	0.999	11169.p1	Iossifov;ASC_v15_VCF	exome	autism	;11169		;68521	;68523	;Male
12573.p1||15_26828534_C_T	15_26828534_C_T	12573.p1||15_26828534_C_T||hg19.ET-2562-3-155475-193374-193457-196332[.][25]	NDD	chr15	26828534	C	T	26828479	26828561	-	exonic.3ss	27	0.961443	-0.0755871	exonic	GABRB3	.	nonsynonymous SNV	GABRB3:NM_001191320:exon3:c.G234A:p.M78I,GABRB3:NM_001191321:exon3:c.G276A:p.M92I,GABRB3:NM_000814:exon5:c.G489A:p.M163I,GABRB3:NM_021912:exon5:c.G489A:p.M163I,GABRB3:NM_001278631:exon6:c.G234A:p.M78I	D	D	D	D	D	M	T	D	D	D	D	D	24.3	0.935	0.985	12573.p1	ASC_v15_VCF	exome	autism	12573		SSC05953	SSC05948	Male
12522.p1||6_87928346_C_G	6_87928346_C_G	12522.p1||6_87928346_C_G||hg19.ET-23036-3-63827-66045-66181-80774[.][4]	NDD	chr6	87928346	C	G	87928314	87928449	+	exonic.3ss	32	0.937241	-0.0753732	exonic	ZNF292	.	nonsynonymous SNV	ZNF292:NM_015021:exon4:c.C435G:p.S145R,ZNF292:NM_001351444:exon5:c.C15G:p.S5R	D	D	D	D	D	L	T	N	T	T	T	D	24.7	0.935	1	12522.p1	Krumm	exome	autism
09C89010||13_21148564_G_T	13_21148564_G_T	09C89010||13_21148564_G_T||hg19.ET-8100-3-3929-10311-10407-18888[.][44][UPT][DNT]	NDD	chr13	21148564	G	T	21148519	21148614	+	exonic.3ss	45	0.945397	-0.0746387	exonic	IFT88	.	nonsynonymous SNV	IFT88:NM_001318491:exon2:c.G40T:p.D14Y,IFT88:NM_006531:exon2:c.G40T:p.D14Y,IFT88:NM_001318493:exon3:c.G67T:p.D23Y,IFT88:NM_175605:exon4:c.G67T:p.D23Y	D	D	D	D	D	M	T	D	T	T	D	D	29.3	1.038	1	09C89010	ASC_v15_VCF	exome	autism	09C89010		09C89008	09C89009	Male
13985.p1||13_96251708_A_C	13_96251708_A_C	13985.p1||13_96251708_A_C||hg19.ET-22873-3-41704-48282-48342-53620[.][13]	NDD	chr13	96251708	A	C	96251619	96251678	-	upstream	-30	0.942916	-0.074599	intronic	DZIP1	.	.	.	.	.	.	.	.	.	.	.	.	.	.	.	.	.	.	13985.p1	Iossifov;ASC_v15_VCF	exome	autism	;13985		;13985.fa	;13985.mo	;Male
14191.p1||20_34313085_G_C	20_34313085_G_C	14191.p1||20_34313085_G_C||hg19.ET-9584-3-16025-20181-20299-20614[.][92][DNT]	NDD	chr20	34313085	G	C	34312960	34313077	-	upstream	-8	0.978572	-0.0744556	intronic	RBM39	.	.	.	.	.	.	.	.	.	.	.	.	.	.	.	.	.	.	14191.p1	Iossifov;ASC_v15_VCF	exome	autism	;14191		;70447	;70463	;Male
12469.p1||2_220045455_A_T	2_220045455_A_T	12469.p1||2_220045455_A_T||hg19.ET-79137-3-5029-5453-5538-5845[.][49][UPT]	NDD	chr2	220045455	A	T	220045392	220045476	+	exonic.5ss	-21	0.978508	-0.0744397	exonic	RETREG2	.	nonsynonymous SNV	RETREG2:NM_024293:exon5:c.A619T:p.I207F	D	P	P	D	D	M	T	D	T	T	T	D	26.8	0.16	0.994	12469.p1	Iossifov;ASC_v15_VCF	exome	autism	;12469		;68697	;68699	;Male
13939.p1||5_140950991_T_G	5_140950991_T_G	13939.p1||5_140950991_T_G||hg19.uc021yep.1_ET16	NDD	chr5	140950991	T	G	140950995	140951003	-	downstream	4	0.160373	-0.0741638	intronic	DIAPH1	.	.	.	.	.	.	.	.	.	.	.	.	.	.	.	.	.	.	13939.p1	Krumm;ASC_v15_VCF	exome	autism	;13939		;SSC09684	;SSC09643	;Male
11005.p1||18_2923776_T_C	18_2923776_T_C	11005.p1||18_2923776_T_C||hg19.ET-9663-3-90550-91086-91173-92748[.][17]	NDD	chr18	2923776	T	C	2923773	2923859	-	exonic.5ss	-3	0.982562	-0.0737296	exonic	LPIN2	.	nonsynonymous SNV	LPIN2:NM_014646:exon16:c.A2171G:p.N724S	T	P	B	N	D	N	T	N	T	T	D	D	19.23	1.061	0.988	11005.p1	Iossifov;ASC_v15_VCF	exome	autism	;11005		;SSC00566	;SSC00565	;Male
NLES15||4_1850936_C_T	4_1850936_C_T	NLES15||4_1850936_C_T||hg19.ET-3954-3-3379-10038-10099-17450[.][18][UPT]	NDD	chr4	1850936	C	T	1850876	1850936	-	exonic.3ss	0	0.966686	-0.0737002	exonic	LETM1	.	nonsynonymous SNV	LETM1:NM_012318:exon2:c.G83A:p.G28D	D	P	B	N	N	M	.	N	T	T	.	D	18.91	0.932	0.025	NLES15	Heyne_2018	exome	EE		simplex			male
IGM4061||19_49637134_C_T	19_49637134_C_T	IGM4061||19_49637134_C_T||hg19.ET-8541-3-16966-17390-17474-17628[.][13]	NDD	chr19	49637134	C	T	49637053	49637136	+	exonic.5ss	-2	0.981842	-0.073434	exonic	PPFIA3	.	nonsynonymous SNV	PPFIA3:NM_003660:exon10:c.C1243T:p.R415W	D	D	D	U	D	M	T	D	T	T	T	N	34	0.852	0.999	IGM4061	ASC_v15_VCF	exome	autism	IGM4061		IGM4061F	IGM4061M	Female
08C72540||1_3428259_G_C	1_3428259_G_C	08C72540||1_3428259_G_C||hg19.ET-1953-3-102490-102808-102946-103593[.][4]	NDD	chr1	3428259	G	C	3428114	3428251	-	upstream	-8	0.921095	-0.0733918	intronic	MEGF6	.	.	.	.	.	.	.	.	.	.	.	.	.	.	.	.	.	.	08C72540	ASC_v15_VCF	exome	autism	08C72540		08C72538	08C72539	Male
188-03-100416||7_38857417_C_A	7_38857417_C_A	188-03-100416||7_38857417_C_A||hg19.ET-27072-3-90998-94318-94384-115336[.][142][DNT]	NDD	chr7	38857417	C	A	38857417	38857482	-	exonic.5ss	0	0.98469	-0.0731975	exonic	VPS41	.	nonsynonymous SNV	VPS41:NM_080631:exon6:c.G375T:p.K125N,VPS41:NM_014396:exon7:c.G450T:p.K150N	D	D	P	D	D	L	T	N	T	T	D	D	27.4	0.789	0.952	188-03-100416	ASC_v15_VCF	exome	autism	188-03-100416		182-08-109823	170-03-100418	Female
DDDP107179||14_30095714_C_T	14_30095714_C_T	DDDP107179||14_30095714_C_T||hg19.ET-5587-3-301653-304137-304210-306435[.][9]	NDD	chr14	30095714	C	T	30095690	30095762	-	exonic.5ss	-24	0.958953	-0.0730456	exonic	PRKD1	.	nonsynonymous SNV	PRKD1:NM_002742:exon12:c.G1774A:p.G592R,PRKD1:NM_001330069:exon13:c.G1798A:p.G600R,PRKD1:NM_001348390:exon13:c.G1510A:p.G504R	D	D	D	D	D	H	D	D	D	D	D	D	34	0.935	0.998	DDDP107179	Heyne_2018	exome	DD		simplex			male
DDDP107562||14_30095714_C_T	14_30095714_C_T	DDDP107562||14_30095714_C_T||hg19.ET-5587-3-301653-304137-304210-306435[.][9]	NDD	chr14	30095714	C	T	30095690	30095762	-	exonic.5ss	-24	0.958953	-0.0730456	exonic	PRKD1	.	nonsynonymous SNV	PRKD1:NM_002742:exon12:c.G1774A:p.G592R,PRKD1:NM_001330069:exon13:c.G1798A:p.G600R,PRKD1:NM_001348390:exon13:c.G1510A:p.G504R	D	D	D	D	D	H	D	D	D	D	D	D	34	0.935	0.998	DDDP107562	Heyne_2018	exome	DD		simplex			male
12265.p1||12_6715436_T_C	12_6715436_T_C	12265.p1||12_6715436_T_C||hg19.ET-1108-3-3086-3934-4112-7888[.][66][UPT][DNT]	NDD	chr12	6715436	T	C	6715440	6715617	-	downstream	4	0.983898	-0.0730408	intronic	CHD4	.	.	.	.	.	.	.	.	.	.	.	.	.	.	.	.	.	.	12265.p1	Krumm;ASC_v15_VCF	exome	autism	;12265		;SSC04768	;SSC04761	;Male
G01-GEA-219-HI||16_5077137_T_C	16_5077137_T_C	G01-GEA-219-HI||16_5077137_T_C||hg19.ET-51172-3-9664-9743-9807-11256[.][16][UPT][DNT]	NDD	chr16	5077137	T	C	5077136	5077199	-	exonic.5ss	-1	0.917673	-0.0728922	exonic	NAGPA	.	nonsynonymous SNV	NAGPA:NM_016256:exon9:c.A1339G:p.R447G	T	B	B	N	N	N	T	N	T	T	T	N	0.292	-0.91	0.017	G01-GEA-219-HI	ASC_v15_VCF	exome	autism	G01-GEA-219-HI		G01-GEA-219-PA	G01-GEA-219-MA	Male
273-07-108464||9_140638338_C_G	9_140638338_C_G	273-07-108464||9_140638338_C_G||hg19.ET-79813-3-127537-127910-128099-136339[.][11]	NDD	chr9	140638338	C	G	140638354	140638542	+	upstream	-16	0.969214	-0.0728366	intronic	EHMT1	.	.	.	.	.	.	.	.	.	.	.	.	.	.	.	.	.	.	273-07-108464	ASC_v15_VCF	exome	autism	273-07-108464		275-07-108466	274-07-108465	Female
14525.p1||2_166152367_G_A	2_166152367_G_A	14525.p1||2_166152367_G_A||hg19.ET-6326-3-3239-59371-59689-60615[.][9][UPT]	NDD	chr2	166152367	G	A	166152283	166152600	+	exonic.3ss	84	0.960942	-0.0726349	exonic	SCN2A	.	nonsynonymous SNV	SCN2A:NM_001040143:exon1:c.G34A:p.D12N,SCN2A:NM_001040142:exon2:c.G34A:p.D12N,SCN2A:NM_021007:exon2:c.G34A:p.D12N	D	P	B	D	D	L	D	D	D	D	D	D	23.4	0.948	1	14525.p1	Iossifov;Heyne_2018;ASC_v15_VCF	exome	autism;ASD	;14525	;simplex	;36777	;36779	;male;Male
DDDP111168||1_46495845_G_A	1_46495845_G_A	DDDP111168||1_46495845_G_A||hg19.ET-23139-3-229341-229516-229626-229994[.][20]	NDD	chr1	46495845	G	A	46495801	46495910	+	exonic.3ss	44	0.961783	-0.0720336	exonic	MAST2	.	nonsynonymous SNV	MAST2:NM_001319245:exon21:c.G2488A:p.E830K,MAST2:NM_001324321:exon21:c.G2026A:p.E676K,MAST2:NM_015112:exon21:c.G2488A:p.E830K,MAST2:NM_001324320:exon22:c.G2509A:p.E837K	D	B	B	D	D	L	T	D	T	T	D	D	25	0.953	0.996	DDDP111168	Heyne_2018	exome	DD		simplex			female
454|Lelieveld_454||22_46681164_C_G	22_46681164_C_G	454|Lelieveld_454||22_46681164_C_G||hg19.ET-55020-3-19069-20277-20316-22109[.][52][DNT]	NDD	chr22	46681164	C	G	46681138	46681176	+	exonic.5ss	-12	0.957347	-0.0718045	exonic	TTC38	.	nonsynonymous SNV	TTC38:NM_017931:exon9:c.C822G:p.I274M	D	B	B	D	N	M	T	N	T	T	D	N	5.114	-1.844	0.001	454|Lelieveld_454	Heyne_2018;Lelieveld2016	exome	ID;intellectualDisability		simplex;			female;
NDAR_INVHB587BPE_wes1||4_71660616_T_C	4_71660616_T_C	NDAR_INVHB587BPE_wes1||4_71660616_T_C||hg19.ET-22902-3-91968-92858-92958-98204[.][11]	NDD	chr4	71660616	T	C	71660512	71660611	+	downstream	5	0.854444	-0.0716384	intronic	RUFY3	.	.	.	.	.	.	.	.	.	.	.	.	.	.	.	.	.	.	NDAR_INVHB587BPE_wes1	De_Rubeis_Nature_2014	exome	autism	NDAR_INVHB587BPE_wes1		NDAR_INVWX120HE6_wes1	NDAR_INVYB376ZW8_wes1	Male
100-07-107879||19_44302764_A_G	19_44302764_A_G	100-07-107879||19_44302764_A_G||hg19.ET-284348-3-24845-25055-25202-25827[.][49][UPT][DNT]	NDD	chr19	44302764	A	G	44302607	44302753	-	upstream	-11	0.74799	-0.0716067	intronic	LYPD5	.	.	.	.	.	.	.	.	.	.	.	.	.	.	.	.	.	.	100-07-107879	ASC_v15_VCF	exome	autism	100-07-107879		102-07-107881	101-07-107880	Male
200675779@1082034642||17_3978572_C_T	17_3978572_C_T	200675779@1082034642||17_3978572_C_T||hg19.ET-23140-3-69323-70530-70697-70781[.][3]	NDD	chr17	3978572	C	T	3978557	3978723	-	exonic.5ss	-15	0.969608	-0.0714575	exonic	ZZEF1	.	nonsynonymous SNV	ZZEF1:NM_015113:exon22:c.G3386A:p.C1129Y	D	D	D	D	D	M	T	D	T	T	D	D	33	0.935	0.997	200675779@1082034642	ASC_v15_VCF	exome	autism	200675779@1082034642		200675448@1082034435	200675449@1082034618	Male
DDDP100724||X_48933541_C_A	X_48933541_C_A	DDDP100724||X_48933541_C_A||hg19.ET-11152-3-26971-27455-27535-27647[.][81][UPT]	NDD	chrX	48933541	C	A	48933525	48933604	-	exonic.5ss	-16	0.944546	-0.0714406	exonic	WDR45	.	nonsynonymous SNV	WDR45:NM_001029896:exon7:c.G500T:p.G167V,WDR45:NM_007075:exon8:c.G503T:p.G168V	D	D	D	U	D	H	T	D	D	D	D	D	28	0.798	0.988	DDDP100724	Heyne_2018	exome	DD		simplex			male
4009-1||11_47256457_G_A	11_47256457_G_A	4009-1||11_47256457_G_A||hg19.ET-1643-3-22731-22815-22993-23328[.][28][DNT]	NDD	chr11	47256457	G	A	47256308	47256485	+	exonic.5ss	-28	0.284714	-0.0714159	exonic	DDB2	.	synonymous SNV	DDB2:NM_000107:exon6:c.G852A:p.S284S	.	.	.	.	.	.	.	.	.	.	.	.	.	.	.	4009-1	Fromer2014	exome	schizophrenia
08C72906||1_205069277_T_C	1_205069277_T_C	08C72906||1_205069277_T_C||hg19.ET-5929-3-23423-24751-24871-24958[.][18]	NDD	chr1	205069277	T	C	205069280	205069399	-	downstream	3	0.97813	-0.0712218	intronic	RBBP5	.	.	.	.	.	.	.	.	.	.	.	.	.	.	.	.	.	.	08C72906	ASC_v15_VCF	exome	autism	08C72906		08C72907	08C72908	Male
AU028A||17_48560001_C_T	17_48560001_C_T	AU028A||17_48560001_C_T||hg19.ET-55316-3-6628-6814-6878-7511[.][25][DNT]	NDD	chr17	48560001	C	T	48560004	48560067	+	upstream	-3	0.919101	-0.0708941	intronic	RSAD1	.	.	.	.	.	.	.	.	.	.	.	.	.	.	.	.	.	.	AU028A	ASC_v15_VCF	exome	autism	AU028A		AU028/029B	AU028/029C	Male
AU029A||17_48560001_C_T	17_48560001_C_T	AU029A||17_48560001_C_T||hg19.ET-55316-3-6628-6814-6878-7511[.][25][DNT]	NDD	chr17	48560001	C	T	48560004	48560067	+	upstream	-3	0.919101	-0.0708941	intronic	RSAD1	.	.	.	.	.	.	.	.	.	.	.	.	.	.	.	.	.	.	AU029A	ASC_v15_VCF	exome	autism	AU029A		AU028/029B	AU028/029C	Male
TAS_F6002Y||6_33048717_G_A	6_33048717_G_A	TAS_F6002Y||6_33048717_G_A||hg19.ET-3115-3-3216-7746-8010-12024[.][216][UPT][DNT]	NDD	chr6	33048717	G	A	33048449	33048712	+	downstream	5	0.903952	-0.0705432	intronic	HLA-DPB1	.	.	.	.	.	.	.	.	.	.	.	.	.	.	.	.	.	.	TAS_F6002Y	ASC_v15_VCF	exome	autism	TAS_F6002Y		TAS_F6002YA	TAS_F6002YB	Male
12817.p1||2_144008169_G_A	2_144008169_G_A	12817.p1||2_144008169_G_A||hg19.ET-55843-3-102339-124181-124271-309271[.][39]	NDD	chr2	144008169	G	A	144008080	144008169	+	exonic.5ss	0	0.986876	-0.070186	exonic	ARHGAP15	.	synonymous SNV	ARHGAP15:NM_018460:exon6:c.G474A:p.Q158Q	.	.	.	.	.	.	.	.	.	.	.	.	.	.	.	12817.p1	Iossifov;SSC_Iossifov_2014	exome	autism	;12817		;12817.fa	;12817.mo	;Male
08C73976||10_127677225_C_T	10_127677225_C_T	08C73976||10_127677225_C_T||hg19.ET-92565-3-86800-95012-95137-101878[.][13][DNT]	NDD	chr10	127677225	C	T	127677120	127677244	+	exonic.5ss	-19	0.971661	-0.0700532	exonic	FANK1	.	synonymous SNV	FANK1:NM_001350939:exon3:c.C297T:p.L99L,FANK1:NM_145235:exon3:c.C297T:p.L99L	.	.	.	.	.	.	.	.	.	.	.	.	.	.	.	08C73976	ASC_v15_VCF	exome	autism	08C73976		08C74136	08C74135	Male
80001101240||12_58009666_G_T	12_58009666_G_T	80001101240||12_58009666_G_T||hg19.ET-115557-3-8533-8657-8838-9104[.][11]	NDD	chr12	58009666	G	T	58009620	58009800	+	exonic.3ss	46	0.914172	-0.0696836	exonic	ARHGEF25	.	nonsynonymous SNV	ARHGEF25:NM_001347933:exon12:c.G1196T:p.R399L,ARHGEF25:NM_182947:exon13:c.G1286T:p.R429L,ARHGEF25:NM_001111270:exon14:c.G1403T:p.R468L	D	D	P	N	D	L	T	D	T	T	T	D	29.7	0.953	0.999	80001101240	ASC_v15_VCF	exome	autism	80001101240		80001101240-2	80001101240-1	Female
12724.p1||10_93608137_T_C	10_93608137_T_C	12724.p1||10_93608137_T_C||hg19.ET-80351-3-50547-52989-53242-54118[.][14][UPT]	NDD	chr10	93608137	T	C	93608140	93608392	+	upstream	-3	0.976285	-0.0695831	intronic	TNKS2	.	.	.	.	.	.	.	.	.	.	.	.	.	.	.	.	.	.	12724.p1	ASC_v15_VCF	exome	autism	12724		SSC05504	SSC05479	Female
DDDP106356||7_123334834_A_C	7_123334834_A_C	DDDP106356||7_123334834_A_C||hg19.ET-8976-3-56240-57194-57348-59195[.][15]	NDD	chr7	123334834	A	C	123334769	123334922	-	exonic.5ss	-65	0.982474	-0.0694865	exonic	WASL	.	nonsynonymous SNV	WASL:NM_003941:exon8:c.T761G:p.V254G	D	B	B	N	D	L	D	D	T	T	D	D	22.8	0.197	1	DDDP106356	Heyne_2018	exome	DD		simplex			male
DDDP107596||2_203686147_T_A	2_203686147_T_A	DDDP107596||2_203686147_T_A||hg19.ET-130026-3-48954-53167-53291-54749[.][16][DNT]	NDD	chr2	203686147	T	A	203686081	203686204	-	exonic.3ss	57	0.750476	-0.0692228	exonic	ICA1L	.	nonsynonymous SNV	ICA1L:NM_001288624:exon3:c.A293T:p.D98V,ICA1L:NM_001288622:exon4:c.A293T:p.D98V,ICA1L:NM_001288623:exon4:c.A293T:p.D98V,ICA1L:NM_138468:exon5:c.A293T:p.D98V	D	D	D	D	D	M	T	D	D	D	D	D	29.3	0.913	0.256	DDDP107596	Heyne_2018	exome	DD		simplex			male
08C76897||2_3464042_C_T	2_3464042_C_T	08C76897||2_3464042_C_T||hg19.ET-51112-3-81019-83588-83662-88922[.][65][UPT][DNT]	NDD	chr2	3464042	C	T	3464034	3464107	+	exonic.3ss	8	0.955912	-0.0690028	exonic	TRAPPC12	.	nonsynonymous SNV	TRAPPC12:NM_001321102:exon8:c.C1612T:p.R538W,TRAPPC12:NM_016030:exon8:c.C1612T:p.R538W	D	D	P	N	N	N	T	D	T	T	D	D	31	0.892	0.273	08C76897	ASC_v15_VCF	exome	autism	08C76897		08C76898	08C76899	Male
DDDP103692||12_21995260_C_T	12_21995260_C_T	DDDP103692||12_21995260_C_T||hg19.ET-10060-3-95212-97223-97381-101524[.][5]	NDD	chr12	21995260	C	T	21995248	21995405	-	exonic.5ss	-12	0.979123	-0.0687313	exonic	ABCC9	.	nonsynonymous SNV	ABCC9:NM_005691:exon27:c.G3461A:p.R1154Q,ABCC9:NM_020297:exon27:c.G3461A:p.R1154Q	D	P	B	D	D	M	D	N	D	D	D	D	35	0.919	0.967	DDDP103692	Heyne_2018	exome	DD		simplex			male
DDDP101457||18_23872325_C_T	18_23872325_C_T	DDDP101457||18_23872325_C_T||hg19.ET-6875-3-63055-68801-68937-69981[.][5]	NDD	chr18	23872325	C	T	23872210	23872345	+	exonic.5ss	-20	0.971843	-0.0685482	exonic	TAF4B	.	nonsynonymous SNV	TAF4B:NM_001293725:exon8:c.C1721T:p.P574L,TAF4B:NM_005640:exon8:c.C1706T:p.P569L	D	B	B	N	D	L	T	N	T	T	T	D	23.2	0.848	0.953	DDDP101457	Heyne_2018	exome	DD		simplex			male
13835.p1||3_119205717_C_T	3_119205717_C_T	13835.p1||3_119205717_C_T||hg19.ET-56983-3-19450-20895-20995-22991[.][16][UPT]	NDD	chr3	119205717	C	T	119205680	119205779	+	exonic.3ss	37	0.931936	-0.0675795	exonic	POGLUT1	.	nonsynonymous SNV	POGLUT1:NM_152305:exon7:c.C676T:p.R226W	D	D	D	D	D	H	T	D	T	T	D	D	35	0.892	1	13835.p1	Iossifov;SSC_Iossifov_2014	exome	autism	;13835		;13835.fa	;13835.mo	;Female
DDDP103057||2_233347144_C_T	2_233347144_C_T	DDDP103057||2_233347144_C_T||hg19.ET-9427-3-8273-8353-8405-8973[.][13]	NDD	chr2	233347144	C	T	233347128	233347179	-	exonic.5ss	-16	0.962286	-0.0674337	exonic	ECEL1	.	nonsynonymous SNV	ECEL1:NM_001290787:exon12:c.G1774A:p.D592N,ECEL1:NM_004826:exon12:c.G1780A:p.D594N	T	B	B	D	D	N	D	N	T	T	D	D	23.4	0.852	0.951	DDDP103057	Heyne_2018	exome	DD		simplex			male
DDDP107017||15_50923659_C_T	15_50923659_C_T	DDDP107017||15_50923659_C_T||hg19.ET-54822-3-56947-58326-58399-61566[.][5]	NDD	chr15	50923659	C	T	50923614	50923686	-	exonic.3ss	27	0.971679	-0.0670879	exonic	TRPM7	.	nonsynonymous SNV	TRPM7:NM_001301212:exon10:c.G1159A:p.E387K,TRPM7:NM_017672:exon10:c.G1159A:p.E387K	T	B	B	D	D	M	T	N	T	T	T	D	23.5	0.807	0.999	DDDP107017	Heyne_2018	exome	DD		simplex			male
HI4256||4_25396436_T_C	4_25396436_T_C	HI4256||4_25396436_T_C||hg19.ET-29945-3-20488-20603-20680-22438[.][8]	NDD	chr4	25396436	T	C	25396451	25396527	+	upstream	-15	0.932231	-0.066988	intronic	ANAPC4	.	.	.	.	.	.	.	.	.	.	.	.	.	.	.	.	.	.	HI4256	ASC_v15_VCF	exome	autism	HI4256		05HI4258A	05HI4257A	Female
EGAN00001100925||19_38198921_A_G	19_38198921_A_G	EGAN00001100925||19_38198921_A_G||hg19.ET-84775-3-13095-14778-14877-22895[.][4][DNT]	NDD	chr19	38198921	A	G	38198815	38198913	-	upstream	-8	0.570485	-0.0667597	intronic	ZNF607	.	.	.	.	.	.	.	.	.	.	.	.	.	.	.	.	.	.	EGAN00001100925	ASC_v15_VCF	exome	autism	EGAN00001100925		EGAN00001101186	EGAN00001101007	Male
12310.p1||2_220100806_C_T	2_220100806_C_T	12310.p1||2_220100806_C_T||hg19.ET-55139-3-9119-9253-9339-9565[.][85][UPT][DNT]	NDD	chr2	220100806	C	T	220100732	220100817	+	exonic.5ss	-11	0.980003	-0.0666128	exonic	ANKZF1	.	synonymous SNV	ANKZF1:NM_001282792:exon10:c.C1416T:p.I472I,ANKZF1:NM_001042410:exon13:c.C2046T:p.I682I,ANKZF1:NM_018089:exon13:c.C2046T:p.I682I	.	.	.	.	.	.	.	.	.	.	.	.	.	.	.	12310.p1	Iossifov;ASC_v15_VCF	exome	autism	;12310		;70243	;70259	;Male
11434.p1||14_102508461_G_A	14_102508461_G_A	11434.p1||14_102508461_G_A||hg19.ET-1778-3-80207-80485-80597-80700[.][67][DNT]	NDD	chr14	102508461	G	A	102508350	102508461	+	exonic.5ss	0	0.979457	-0.0665992	exonic	DYNC1H1	.	nonsynonymous SNV	DYNC1H1:NM_001376:exon66:c.G12214A:p.G4072S	D	D	D	D	D	M	T	D	T	T	.	D	33	1.048	0.856	11434.p1	Iossifov;ASC_v15_VCF	exome	autism	;11434		;SSC02981	;SSC02976	;Female
07C69336||1_236341808_A_G	1_236341808_A_G	07C69336||1_236341808_A_G||hg19.ET-7107-3-29224-38882-39105-40347[.][26][UPT][DNT]	NDD	chr1	236341808	A	G	236341714	236341936	+	exonic.3ss	94	0.96656	-0.0662561	exonic	GPR137B	.	nonsynonymous SNV	GPR137B:NM_003272:exon3:c.A559G:p.R187G	T	B	B	D	D	L	T	N	T	T	D	D	18.98	0.191	0.589	07C69336	ASC_v15_VCF	exome	autism	07C69336		07C69305	07C69337	Male
359-09-111818||1_45292761_A_C	1_45292761_A_C	359-09-111818||1_45292761_A_C||hg19.ET-8643-3-18778-18862-19043-19176[.][8]	NDD	chr1	45292761	A	C	45292574	45292754	-	upstream	-7	0.945962	-0.0662158	intronic	PTCH2	.	.	.	.	.	.	.	.	.	.	.	.	.	.	.	.	.	.	359-09-111818	ASC_v15_VCF	exome	autism	359-09-111818		361-09-111824	360-09-111821	Male
NDAR_INVRB928JBD_wes1||21_41496267_G_C	21_41496267_G_C	NDAR_INVRB928JBD_wes1||21_41496267_G_C||hg19.ET-1826-3-716259-725784-725918-756238[.][9][UPT]	NDD	chr21	41496267	G	C	41496122	41496255	-	upstream	-12	0.938217	-0.0654503	intronic	DSCAM	.	.	.	.	.	.	.	.	.	.	.	.	.	.	.	.	.	.	NDAR_INVRB928JBD_wes1	De_Rubeis_Nature_2014	exome	autism	NDAR_INVRB928JBD_wes1		NDAR_INVPF976FP8_wes1	NDAR_INVXA119KLQ_wes1	Male
08C75732||12_53708082_C_T	12_53708082_C_T	08C75732||12_53708082_C_T||hg19.ET-8086-3-9878-10187-10331-14907[.][69][DNT]	NDD	chr12	53708082	C	T	53708082	53708225	-	exonic.5ss	0	0.976822	-0.0649006	exonic	AAAS	.	nonsynonymous SNV	AAAS:NM_001173466:exon6:c.G590A:p.R197Q,AAAS:NM_015665:exon7:c.G689A:p.R230Q	D	D	D	D	D	M	D	D	D	D	D	D	35	0.892	0.927	08C75732	ASC_v15_VCF	exome	autism	08C75732		08C75733	08C75642	Male
C1004-03||11_18317611_C_T	11_18317611_C_T	C1004-03||11_18317611_C_T||hg19.ET-11234-3-28377-29052-29176-30005[.][20]	NDD	chr11	18317611	C	T	18317546	18317669	-	exonic.3ss	58	0.840829	-0.0648167	exonic	HPS5	.	synonymous SNV	HPS5:NM_007216:exon12:c.G1227A:p.P409P,HPS5:NM_181508:exon12:c.G1227A:p.P409P,HPS5:NM_181507:exon13:c.G1569A:p.P523P	.	.	.	.	.	.	.	.	.	.	.	.	.	.	.	C1004-03	Willsey2017	exome	tourette_syndrome
AU1829304||20_44452926_C_A	20_44452926_C_A	AU1829304||20_44452926_C_A||hg19.ET-7125-3-5820-5908-6023-6187[.][276][UPT][DNT]	NDD	chr20	44452926	C	A	44452931	44453045	-	downstream	5	0.967814	-0.0647939	intronic	TNNC2	.	.	.	.	.	.	.	.	.	.	.	.	.	.	.	.	.	.	AU1829304	ASC_v15_VCF	exome	autism	AU1829304		AU1829201	AU1829202	Male
12664.p1||15_65209717_C_T	15_65209717_C_T	12664.p1||15_65209717_C_T||hg19.ET-348094-3-6999-8484-8613-13019[.][2]	NDD	chr15	65209717	C	T	65209585	65209713	+	downstream	4	0.377984	-0.0644655	intronic	ANKDD1A	.	.	.	.	.	.	.	.	.	.	.	.	.	.	.	.	.	.	12664.p1	SSC_Iossifov_2014	exome	autism	12664		12664.fa	12664.mo	Male
13931.p1||11_73843995_G_C	11_73843995_G_C	13931.p1||11_73843995_G_C||hg19.ET-26005-3-40595-41047-41176-50884[.][5]	NDD	chr11	73843995	G	C	73843889	73844017	-	exonic.3ss	22	0.962676	-0.0643916	exonic	C2CD3	.	nonsynonymous SNV	C2CD3:NM_001286577:exon7:c.C1111G:p.R371G,C2CD3:NM_015531:exon7:c.C1111G:p.R371G	T	B	B	N	N	L	T	N	T	T	T	N	7.936	0.953	0.116	13931.p1	Krumm	exome	autism
12910.p1||12_46230691_C_T	12_46230691_C_T	12910.p1||12_46230691_C_T||hg19.ET-196528-3-109819-109904-110155-110484[.][7]	NDD	chr12	46230691	C	T	46230524	46230774	+	exonic.5ss	-83	0.965136	-0.0643255	exonic	ARID2	.	nonsynonymous SNV	ARID2:NM_001347839:exon8:c.C940T:p.R314C,ARID2:NM_152641:exon8:c.C940T:p.R314C	D	D	D	D	D	M	T	D	T	T	D	D	34	0.892	1	12910.p1	Iossifov;ASC_v15_VCF	exome	autism	;12910		;SSC05766	;SSC05761	;Male
14368.p1||9_128092441_C_G	9_128092441_C_G	14368.p1||9_128092441_C_G||hg19.ET-26130-3-67758-71246-71387-73094[.][22][UPT]	NDD	chr9	128092441	C	G	128092357	128092497	+	exonic.5ss	-56	0.973621	-0.0636362	exonic	GAPVD1	.	nonsynonymous SNV	GAPVD1:NM_001282681:exon10:c.C2054G:p.T685S,GAPVD1:NM_001330778:exon11:c.C2117G:p.T706S,GAPVD1:NM_015635:exon11:c.C2117G:p.T706S,GAPVD1:NM_001330777:exon12:c.C2054G:p.T685S,GAPVD1:NM_001282679:exon13:c.C2117G:p.T706S,GAPVD1:NM_001282680:exon13:c.C2117G:p.T706S	T	D	D	D	D	N	T	N	T	T	D	D	23.4	0.852	1	14368.p1	Iossifov;ASC_v15_VCF	exome	autism	;14368		;36116	;36118	;Male
11999.p1||3_129152809_C_T	3_129152809_C_T	11999.p1||3_129152809_C_T||hg19.ET-8930-3-8948-9025-9160-9762[.][35]	NDD	chr3	129152809	C	T	129152693	129152827	-	exonic.3ss	18	0.972267	-0.0635829	exonic	MBD4	.	nonsynonymous SNV	MBD4:NM_001276273:exon4:c.G341A:p.R114H,MBD4:NM_001276270:exon5:c.G1277A:p.R426H,MBD4:NM_001276271:exon5:c.G1295A:p.R432H,MBD4:NM_001276272:exon5:c.G1295A:p.R432H,MBD4:NM_003925:exon5:c.G1295A:p.R432H	D	P	B	D	D	L	D	N	D	D	D	D	34	0.852	0.999	11999.p1	Iossifov;ASC_v15_VCF	exome	autism	;11999		;11999.fa	;11999.mo	;Female
DDDP104680||1_237982492_G_T	1_237982492_G_T	DDDP104680||1_237982492_G_T||hg19.ET-6262-3-769634-779634-779791-788979[.][4]	NDD	chr1	237982492	G	T	237982336	237982492	+	exonic.5ss	0	0.984966	-0.0629632	exonic	RYR2	.	nonsynonymous SNV	RYR2:NM_001035:exon101:c.G14590T:p.G4864C	D	D	D	U	D	M	D	D	D	D	.	D	26.4	1.048	0.959	DDDP104680	Heyne_2018	exome	DD		simplex			male
13874.p1||8_145580668_C_T	8_145580668_C_T	13874.p1||8_145580668_C_T||hg19.ET-26233-3-4085-4402-4534-4608[.][15]	NDD	chr8	145580668	C	T	145580650	145580781	-	exonic.5ss	-18	0.621465	-0.0628576	exonic	FBXL6	.	synonymous SNV	FBXL6:NM_012162:exon4:c.G753A:p.L251L,FBXL6:NM_024555:exon4:c.G735A:p.L245L	.	.	.	.	.	.	.	.	.	.	.	.	.	.	.	13874.p1	ASC_v15_VCF	exome	autism	13874		13874.fa	13874.mo	Male
14455.p1||5_156929856_G_A	5_156929856_G_A	14455.p1||5_156929856_G_A||hg19.ET-8728-3-73107-75795-75973-79113[.][10][DNT]	NDD	chr5	156929856	G	A	156929811	156929988	-	exonic.5ss	-45	0.964679	-0.0623585	exonic	ADAM19	.	synonymous SNV	ADAM19:NM_033274:exon12:c.C1263T:p.N421N	.	.	.	.	.	.	.	.	.	.	.	.	.	.	.	14455.p1	Iossifov;ASC_v15_VCF	exome	autism	;14455		;SSC11453	;SSC11165	;Female
ASDFI_1144||1_222835428_G_A	1_222835428_G_A	ASDFI_1144||1_222835428_G_A||hg19.ET-375056-3-45213-46954-47023-47151[.][30][DNT]	NDD	chr1	222835428	G	A	222835398	222835466	+	exonic.3ss	30	0.919404	-0.0621755	exonic	MIA3	.	nonsynonymous SNV	MIA3:NM_001300867:exon20:c.G1778A:p.R593Q,MIA3:NM_001324065:exon20:c.G1778A:p.R593Q,MIA3:NM_001324063:exon23:c.G4967A:p.R1656Q,MIA3:NM_001324062:exon25:c.G5144A:p.R1715Q,MIA3:NM_198551:exon25:c.G5144A:p.R1715Q,MIA3:NM_001324064:exon26:c.G4652A:p.R1551Q	D	P	B	.	N	M	T	N	T	T	T	N	24.6	0.138	0.984	ASDFI_1144	DeRubeis2014;ASC_v15_VCF	exome	autism	;ASDFI_1144		;ASDFI_1146	;ASDFI_1145	;Male
11768.p1||1_41541149_A_C	1_41541149_A_C	11768.p1||1_41541149_A_C||hg19.ET-22955-3-131861-169692-169925-174422[.][20]	NDD	chr1	41541149	A	C	41540891	41541123	-	upstream	-26	0.921363	-0.0618393	intronic	SCMH1	.	.	.	.	.	.	.	.	.	.	.	.	.	.	.	.	.	.	11768.p1	ASC_v15_VCF	exome	autism	11768		11768.fa	11768.mo	Male
DDDP101054||7_36660406_G_A	7_36660406_G_A	DDDP101054||7_36660406_G_A||hg19.ET-313-3-105839-106719-106768-109203[.][12]	NDD	chr7	36660406	G	A	36660387	36660435	-	exonic.5ss	-19	0.947636	-0.061746	exonic	AOAH	.	nonsynonymous SNV	AOAH:NM_001177507:exon8:c.C587T:p.S196L,AOAH:NM_001637:exon9:c.C683T:p.S228L	.	P	B	D	D	.	.	.	D	D	T	D	29.1	0.953	0.948	DDDP101054	Heyne_2018	exome	DD		simplex			male
DDDP120217||2_197953468_C_T	2_197953468_C_T	DDDP120217||2_197953468_C_T||hg19.ET-91526-3-223848-225023-225087-227049[.][3]	NDD	chr2	197953468	C	T	197953435	197953498	-	exonic.3ss	30	0.755929	-0.0616988	exonic	ANKRD44	.	nonsynonymous SNV	ANKRD44:NM_001195144:exon12:c.G1214A:p.G405E	D	D	D	D	D	M	T	D	D	D	D	D	28.7	0.935	1	DDDP120217	Heyne_2018	exome	DD		simplex			male
DDDP106645||3_183560189_G_A	3_183560189_G_A	DDDP106645||3_183560189_G_A||hg19.ET-55486-3-43675-45458-45608-47265[.][50][UPT][DNT]	NDD	chr3	183560189	G	A	183560086	183560235	-	exonic.3ss	46	0.854998	-0.061655	exonic	PARL	.	synonymous SNV	PARL:NM_001324436:exon6:c.C654T:p.S218S,PARL:NM_001324438:exon6:c.C654T:p.S218S,PARL:NM_018622:exon6:c.C654T:p.S218S	.	.	.	.	.	.	.	.	.	.	.	.	.	.	.	DDDP106645	Heyne_2018	exome	DD		simplex			female
UK10K_SKUSE5080180||6_43107166_A_C	6_43107166_A_C	UK10K_SKUSE5080180||6_43107166_A_C||hg19.ET-5754-3-65981-66115-66235-68377[.][32]	NDD	chr6	43107166	A	C	43107144	43107263	+	exonic.3ss	22	0.86122	-0.0614896	exonic	PTK7	.	synonymous SNV	PTK7:NM_001270398:exon10:c.A1545C:p.P515P,PTK7:NM_002821:exon10:c.A1521C:p.P507P,PTK7:NM_152882:exon10:c.A1521C:p.P507P	.	.	.	.	.	.	.	.	.	.	.	.	.	.	.	UK10K_SKUSE5080180	DeRubeis2014;De_Rubeis_Nature_2014	exome	autism	;UK10K_SKUSE5080180		;UK10K_SKUSE5208446	;UK10K_SKUSE5208447	;Male
08C78500||19_3643388_A_G	19_3643388_A_G	08C78500||19_3643388_A_G||hg19.ET-23396-3-59393-60098-60237-60540[.][12]	NDD	chr19	3643388	A	G	3643241	3643379	-	upstream	-9	0.977295	-0.061418	intronic	PIP5K1C	.	.	.	.	.	.	.	.	.	.	.	.	.	.	.	.	.	.	08C78500	ASC_v15_VCF	exome	autism	08C78500		08C78422	08C78499	Male
200675647@1082034423||17_79010660_C_T	17_79010660_C_T	200675647@1082034423||17_79010660_C_T||hg19.ET-10458-3-3162-4716-4815-21521[.][24][UPT]	NDD	chr17	79010660	C	T	79010663	79010761	+	upstream	-3	0.0765848	-0.0611513	intronic	BAIAP2	.	.	.	.	.	.	.	.	.	.	.	.	.	.	.	.	.	.	200675647@1082034423	ASC_v15_VCF	exome	autism	200675647@1082034423		200675645@1082035019	200675646@1082034436	Male
TUBA080997||18_53070725_G_A	18_53070725_G_A	TUBA080997||18_53070725_G_A||hg19.ET-6925-3-177939-235439-235504-287954[.][70]	NDD	chr18	53070725	G	A	53070685	53070749	-	exonic.3ss	24	0.850979	-0.0609596	exonic	TCF4	.	nonsynonymous SNV	TCF4:NM_001243232:exon2:c.C119T:p.S40L,TCF4:NM_001306208:exon2:c.C119T:p.S40L,TCF4:NM_001243231:exon4:c.C203T:p.S68L,TCF4:NM_001348211:exon4:c.C203T:p.S68L,TCF4:NM_001243227:exon5:c.C257T:p.S86L,TCF4:NM_001243230:exon5:c.C323T:p.S108L,TCF4:NM_001306207:exon5:c.C257T:p.S86L,TCF4:NM_001348217:exon5:c.C257T:p.S86L,TCF4:NM_001348218:exon5:c.C257T:p.S86L,TCF4:NM_001348219:exon5:c.C257T:p.S86L,TCF4:NM_…	T	B	B	D	D	L	T	N	T	T	T	D	18.02	1.048	1	TUBA080997	Rauch2012;Heyne_2018	exome	intellectualDisability;ID		;simplex			;female
DDDP109634||14_24587337_G_A	14_24587337_G_A	DDDP109634||14_24587337_G_A||hg19.ET-80344-3-6036-6358-6459-6691[.][63][UPT][DNT]	NDD	chr14	24587337	G	A	24587264	24587364	+	exonic.5ss	-27	0.980632	-0.0605864	exonic	DCAF11	.	nonsynonymous SNV	DCAF11:NM_001163484:exon6:c.G550A:p.G184S,DCAF11:NM_025230:exon6:c.G550A:p.G184S,DCAF11:NM_181357:exon6:c.G472A:p.G158S	D	D	D	D	D	M	T	D	D	D	D	D	29.9	1.044	1	DDDP109634	Heyne_2018	exome	DD		simplex			female
13371.p1||1_93580638_C_T	1_93580638_C_T	13371.p1||1_93580638_C_T||hg19.ET-22823-3-38549-38753-38854-39235[.][45]	NDD	chr1	93580638	C	T	93580545	93580645	+	exonic.5ss	-7	0.980271	-0.0603322	exonic	MTF2	.	nonsynonymous SNV	MTF2:NM_001164393:exon3:c.C170T:p.T57I,MTF2:NM_001164392:exon5:c.C476T:p.T159I,MTF2:NM_007358:exon5:c.C476T:p.T159I,MTF2:NM_001164391:exon6:c.C170T:p.T57I	D	P	B	N	D	L	D	N	T	T	D	D	23.6	0.935	0.999	13371.p1	Iossifov;Heyne_2018;ASC_v15_VCF	exome	autism;ASD	;13371	;simplex	;68746	;68748	;male;Male
DDDP105927||11_9983525_C_A	11_9983525_C_A	DDDP105927||11_9983525_C_A||hg19.ET-81846-3-333435-335101-335251-401196[.][5]	NDD	chr11	9983525	C	A	9983504	9983653	-	exonic.5ss	-21	0.984119	-0.0601974	exonic	SBF2	.	nonsynonymous SNV	SBF2:NM_030962:exon16:c.G1839T:p.R613S	D	P	P	D	D	M	T	D	T	T	D	D	31	0.852	1	DDDP105927	Heyne_2018	exome	DD		simplex			male
DDDP115403||9_132618612_C_T	9_132618612_C_T	DDDP115403||9_132618612_C_T||hg19.ET-10868-3-20220-23890-23944-25633[.][34]	NDD	chr9	132618612	C	T	132618586	132618639	+	exonic.3ss	26	0.981913	-0.0601365	exonic	USP20	.	synonymous SNV	USP20:NM_001008563:exon4:c.C108T:p.T36T,USP20:NM_001110303:exon4:c.C108T:p.T36T,USP20:NM_006676:exon4:c.C108T:p.T36T	.	.	.	.	.	.	.	.	.	.	.	.	.	.	.	DDDP115403	Heyne_2018	exome	DD		simplex			female
297|Lelieveld_297||19_24102797_G_C	19_24102797_G_C	297|Lelieveld_297||19_24102797_G_C||hg19.ET-730087-3-7618-8105-8201-11551[.][2][DNT]	NDD	chr19	24102797	G	C	24102789	24102884	+	exonic.3ss	8	0.733036	-0.0595009	exonic	ZNF726	.	nonsynonymous SNV	ZNF726:NM_001244038:exon3:c.G139C:p.V47L,ZNF726:NM_001348687:exon3:c.G139C:p.V47L,ZNF726:NM_001348688:exon3:c.G139C:p.V47L,ZNF726:NM_001348689:exon3:c.G139C:p.V47L	D	.	.	.	N	L	T	N	T	T	T	N	11.45	0.252	0.905	297|Lelieveld_297	Heyne_2018;Lelieveld2016	exome	ID;intellectualDisability		simplex;			female;
DDDP111996||6_90503557_G_A	6_90503557_G_A	DDDP111996||6_90503557_G_A||hg19.ET-23195-3-28624-28769-28962-32322[.][5]	NDD	chr6	90503557	G	A	90503481	90503673	-	exonic.5ss	-76	0.979957	-0.0592881	exonic	MDN1	.	nonsynonymous SNV	MDN1:NM_014611:exon5:c.C779T:p.S260L	D	D	P	D	D	M	T	D	T	T	D	D	24.3	1.048	0.993	DDDP111996	Heyne_2018	exome	DD		simplex			female
3D615||12_110429454_G_A	12_110429454_G_A	3D615||12_110429454_G_A||hg19.ET-9815-3-3217-7629-7763-9587[.][121][UPT][DNT]	NDD	chr12	110429454	G	A	110429432	110429565	-	exonic.5ss	-22	0.968304	-0.0592647	exonic	GIT2	.	nonsynonymous SNV	GIT2:NM_001135213:exon2:c.C164T:p.P55L,GIT2:NM_001135214:exon2:c.C164T:p.P55L,GIT2:NM_001330153:exon2:c.C164T:p.P55L,GIT2:NM_001330154:exon2:c.C164T:p.P55L,GIT2:NM_014776:exon2:c.C164T:p.P55L,GIT2:NM_057169:exon2:c.C164T:p.P55L,GIT2:NM_057170:exon2:c.C164T:p.P55L,GIT2:NM_139201:exon2:c.C164T:p.P55L	T	B	B	D	D	N	T	D	T	T	T	D	23	1.047	0.991	3D615	ASC_v15_VCF	exome	autism	3D615		4G272	4G273	Male
398|Lelieveld_398||6_71501404_G_A	6_71501404_G_A	398|Lelieveld_398||6_71501404_G_A||hg19.ET-60682-3-108650-126913-126994-133881[.][20][DNT]	NDD	chr6	71501404	G	A	71501392	71501472	+	exonic.3ss	12	0.940086	-0.0588378	exonic	SMAP1	.	nonsynonymous SNV	SMAP1:NM_001044305:exon5:c.G427A:p.D143N,SMAP1:NM_001281440:exon5:c.G397A:p.D133N	D	D	D	N	D	N	T	N	T	T	D	D	25.8	1.048	1	398|Lelieveld_398	Heyne_2018;Lelieveld2016	exome	ID;intellectualDisability		simplex;			male;
3313-1||X_32716053_G_C	X_32716053_G_C	3313-1||X_32716053_G_C||hg19.ET-1756-3-643498-644611-644740-697457[.][11]	NDD	chrX	32716053	G	C	32715987	32716115	-	exonic.3ss	62	0.95334	-0.0585462	exonic	DMD	.	nonsynonymous SNV	DMD:NM_000109:exon9:c.C870G:p.S290R,DMD:NM_004006:exon9:c.C894G:p.S298R,DMD:NM_004009:exon9:c.C882G:p.S294R,DMD:NM_004010:exon9:c.C525G:p.S175R	D	D	P	U	D	M	T	N	T	T	D	D	24.7	-0.267	0.997	3313-1	Fromer2014	exome	schizophrenia
25161.p1||2_153437525_C_T	2_153437525_C_T	25161.p1||2_153437525_C_T||hg19.ET-114793-3-246728-248719-248813-275102[.][11][UPT][DNT]	NDD	chr2	153437525	C	T	153437470	153437563	+	exonic.5ss	-38	0.984878	-0.0582906	exonic	FMNL2	.	nonsynonymous SNV	FMNL2:NM_052905:exon9:c.C838T:p.H280Y	D	D	D	D	D	M	D	D	D	D	D	D	31	0.935	1	25161.p1	Willsey2017	exome	tourette_syndrome
14206.p1||13_29008379_T_G	13_29008379_T_G	14206.p1||13_29008379_T_G||hg19.ET-2321-3-59908-63908-64071-64173[.][28][UPT]	NDD	chr13	29008379	T	G	29008195	29008357	-	upstream	-22	0.978334	-0.0580298	intronic	FLT1	.	.	.	.	.	.	.	.	.	.	.	.	.	.	.	.	.	.	14206.p1	Krumm;ASC_v15_VCF	exome	autism	;14206		;SSC11153	;SSC11150	;Female
336-06-106561||16_57091998_C_T	16_57091998_C_T	336-06-106561||16_57091998_C_T||hg19.ET-84166-3-41446-43991-44075-44898[.][14]	NDD	chr16	57091998	C	T	57091977	57092060	+	exonic.3ss	21	0.810842	-0.0578072	exonic	NLRC5	.	synonymous SNV	NLRC5:NM_001330552:exon27:c.C3681T:p.G1227G,NLRC5:NM_032206:exon27:c.C3768T:p.G1256G	.	.	.	.	.	.	.	.	.	.	.	.	.	.	.	336-06-106561	ASC_v15_VCF	exome	autism	336-06-106561		443-06-106570	337-06-106564	Male
09C96585||7_124493029_T_C	7_124493029_T_C	09C96585||7_124493029_T_C||hg19.ET-25913-3-74027-79845-80012-81032[.][17][DNT]	NDD	chr7	124493029	T	C	124493026	124493192	-	exonic.5ss	-3	0.979035	-0.0577569	exonic	POT1	.	nonsynonymous SNV	POT1:NM_001042594:exon9:c.A473G:p.K158R,POT1:NM_015450:exon10:c.A866G:p.K289R	D	P	B	D	D	M	T	N	T	T	D	D	23.4	1.061	0.999	09C96585	ASC_v15_VCF	exome	autism	09C96585		09C96586	09C96587	Male
DDDP113789||16_56226265_G_C	16_56226265_G_C	DDDP113789||16_56226265_G_C||hg19.ET-2775-3-3569-3884-4015-4235[.][1][UPT][DNT]	NDD	chr16	56226265	G	C	56226135	56226265	+	exonic.5ss	0	0.494952	-0.0575807	exonic	GNAO1	.	nonsynonymous SNV	GNAO1:NM_020988:exon1:c.G118C:p.G40R,GNAO1:NM_138736:exon1:c.G118C:p.G40R	D	D	D	D	D	H	D	D	D	D	.	D	27.1	0.972	0.992	DDDP113789	Heyne_2018	exome	DD		simplex			female
4016001||3_69054322_C_A	3_69054322_C_A	4016001||3_69054322_C_A||hg19.ET-285203-3-8911-11389-11484-12141[.][11]	NDD	chr3	69054322	C	A	69054291	69054385	-	exonic.5ss	-31	0.982995	-0.0575148	exonic	EOGT	.	nonsynonymous SNV	EOGT:NM_001278689:exon7:c.G484T:p.D162Y,EOGT:NM_173654:exon7:c.G484T:p.D162Y	D	D	D	D	D	M	T	D	T	T	D	D	33	0.807	0.96	4016001	ASC_v15_VCF	exome	autism	4016001		4016011	4016012	Male
09C80786||3_97673295_C_T	3_97673295_C_T	09C80786||3_97673295_C_T||hg19.ET-84864-3-16401-20956-21060-24563[.][26][DNT]	NDD	chr3	97673295	C	T	97673236	97673339	-	exonic.3ss	44	0.975466	-0.0573384	exonic	RIOX2	.	synonymous SNV	RIOX2:NM_001042533:exon5:c.G726A:p.A242A,RIOX2:NM_001261829:exon5:c.G726A:p.A242A,RIOX2:NM_032778:exon5:c.G726A:p.A242A,RIOX2:NM_153182:exon5:c.G726A:p.A242A	.	.	.	.	.	.	.	.	.	.	.	.	.	.	.	09C80786	DeRubeis2014;ASC_v15_VCF	exome	autism	;09C80786		;09C80788	;09C80787	;Male
AU121A||11_18591900_C_T	11_18591900_C_T	AU121A||11_18591900_C_T||hg19.ET-55293-3-16400-21369-21533-25264[.][42][UPT][DNT]	NDD	chr11	18591900	C	T	18591761	18591924	-	exonic.3ss	24	0.906805	-0.0572242	exonic	UEVLD	.	nonsynonymous SNV	UEVLD:NM_001261382:exon3:c.G152A:p.R51H,UEVLD:NM_001261383:exon3:c.G152A:p.R51H,UEVLD:NM_001040697:exon4:c.G218A:p.R73H,UEVLD:NM_001261385:exon4:c.G104A:p.R35H,UEVLD:NM_001297771:exon4:c.G218A:p.R73H,UEVLD:NM_018314:exon4:c.G218A:p.R73H	D	D	P	N	D	L	T	N	T	D	D	N	22.7	0.068	0.397	AU121A	DeRubeis2014;ASC_v15_VCF	exome	autism	;AU121A		;AU121B	;AU121C	;Male
DDDP111353||11_118918737_C_T	11_118918737_C_T	DDDP111353||11_118918737_C_T||hg19.ET-10525-3-11966-12133-12267-12395[.][76][UPT][DNT]	NDD	chr11	118918737	C	T	118918659	118918792	-	exonic.3ss	55	0.975021	-0.0572121	exonic	HYOU1	.	nonsynonymous SNV	HYOU1:NM_001130991:exon21:c.G2432A:p.R811Q,HYOU1:NM_006389:exon21:c.G2432A:p.R811Q	.	D	D	D	D	M	.	.	T	T	T	D	35	0.935	0.998	DDDP111353	Heyne_2018	exome	DD		simplex			female
DDDP111878||12_30843474_C_T	12_30843474_C_T	DDDP111878||12_30843474_C_T||hg19.ET-10526-3-3432-8418-8500-14538[.][38][UPT]	NDD	chr12	30843474	C	T	30843430	30843511	-	exonic.3ss	37	0.982931	-0.0568153	exonic	IPO8	.	nonsynonymous SNV	IPO8:NM_006390:exon2:c.G122A:p.R41Q	T	B	B	D	D	N	T	N	T	T	T	D	16.97	0.852	1	DDDP111878	Heyne_2018	exome	DD		simplex			male
DDDP111459||5_145509661_G_A	5_145509661_G_A	DDDP111459||5_145509661_G_A||hg19.ET-51520-3-54713-55573-55714-56613[.][73][UPT]	NDD	chr5	145509661	G	A	145509581	145509721	-	exonic.3ss	60	0.975087	-0.0566615	exonic	LARS	.	nonsynonymous SNV	LARS:NM_001317964:exon24:c.C2410T:p.R804W,LARS:NM_001317965:exon24:c.C2386T:p.R796W,LARS:NM_016460:exon24:c.C2467T:p.R823W,LARS:NM_020117:exon25:c.C2548T:p.R850W	D	B	B	D	D	M	T	D	T	T	T	D	26.5	1.048	0.999	DDDP111459	Heyne_2018	exome	DD		simplex			male
DDDP111825||6_31635646_T_G	6_31635646_T_G	DDDP111825||6_31635646_T_G||hg19.ET-1460-3-4024-4988-5091-5659[.][271][DNT]	NDD	chr6	31635646	T	G	31635645	31635747	+	exonic.3ss	1	0.974146	-0.0566231	exonic	CSNK2B	.	nonsynonymous SNV	CSNK2B:NM_001282385:exon3:c.T74G:p.V25G,CSNK2B:NM_001320:exon3:c.T74G:p.V25G	D	D	D	D	.	H	.	D	D	D	D	D	27.8	0.089	0.949	DDDP111825	Heyne_2018	exome	DD		simplex			male
12056.p1||15_66198459_G_A	15_66198459_G_A	12056.p1||15_66198459_G_A||hg19.ET-84465-3-343001-350596-350653-357803[.][6][UPT][DNT]	NDD	chr15	66198459	G	A	66198423	66198479	-	exonic.3ss	20	0.951822	-0.0564002	exonic	MEGF11	.	nonsynonymous SNV	MEGF11:NM_032445:exon21:c.C2731T:p.R911C	T	D	B	N	D	L	D	N	T	T	D	D	26.2	0.073	0.994	12056.p1	Iossifov;SSC_Iossifov_2014	exome	autism	;12056		;12056.fa	;12056.mo	;Male
NDAR_INVXF145RFL_wes1||5_36255592_C_T	5_36255592_C_T	NDAR_INVXF145RFL_wes1||5_36255592_C_T||hg19.ET-202151-3-47969-49319-49440-51120[.][4]	NDD	chr5	36255592	C	T	36255572	36255692	-	exonic.5ss	-20	0.954369	-0.0563821	exonic	RANBP3L	.	nonsynonymous SNV	RANBP3L:NM_001323279:exon10:c.G932A:p.G311E,RANBP3L:NM_001323273:exon11:c.G1004A:p.G335E,RANBP3L:NM_001323277:exon11:c.G1004A:p.G335E,RANBP3L:NM_001323278:exon11:c.G944A:p.G315E,RANBP3L:NM_001323280:exon11:c.G944A:p.G315E,RANBP3L:NM_145000:exon11:c.G1004A:p.G335E,RANBP3L:NM_001161429:exon12:c.G1079A:p.G360E,RANBP3L:NM_001323274:exon12:c.G1079A:p.G360E,RANBP3L:NM_001323275:exon12:c.G1019A:p.G340E,…	D	D	D	D	D	L	T	D	T	T	D	D	32	0.935	1	NDAR_INVXF145RFL_wes1	DeRubeis2014;De_Rubeis_Nature_2014	exome	autism	;NDAR_INVXF145RFL_wes1		;NDAR_INVRC250BUD_wes1	;NDAR_INVUN498HR1_wes1	;Male
DDDP111691||6_131199278_C_T	6_131199278_C_T	DDDP111691||6_131199278_C_T||hg19.ET-2037-3-186179-188072-188219-196196[.][7]	NDD	chr6	131199278	C	T	131199244	131199390	-	exonic.5ss	-34	0.58454	-0.0562581	exonic	EPB41L2	.	nonsynonymous SNV	EPB41L2:NM_001350299:exon14:c.G2009A:p.R670Q,EPB41L2:NM_001350301:exon14:c.G2009A:p.R670Q,EPB41L2:NM_001350302:exon14:c.G2009A:p.R670Q,EPB41L2:NM_001431:exon14:c.G2009A:p.R670Q	D	D	D	D	D	M	D	N	D	D	D	D	33	0.935	1	DDDP111691	Heyne_2018	exome	DD		simplex			female
4120-1||10_98287002_G_A	10_98287002_G_A	4120-1||10_98287002_G_A||hg19.ET-56889-3-62640-62763-62840-67722[.][77][DNT]	NDD	chr10	98287002	G	A	98286970	98287046	-	exonic.5ss	-32	0.978372	-0.0562223	exonic	TM9SF3	.	nonsynonymous SNV	TM9SF3:NM_020123:exon14:c.C1670T:p.A557V	D	D	B	D	D	M	T	D	T	T	D	D	24	0.998	0.998	4120-1	Fromer2014	exome	schizophrenia
14210.p1||4_727582_C_T	4_727582_C_T	14210.p1||4_727582_C_T||hg19.ET-10336-3-28327-30888-31006-32147[.][82]	NDD	chr4	727582	C	T	727461	727578	+	downstream	4	0.940661	-0.056174	intronic	PCGF3	.	.	.	D	.	.	.	D	.	T	N	T	T	T	N	8.438	-2.885	0.078	14210.p1	Iossifov;ASC_v15_VCF	exome	autism	;14210		;SSC10827	;SSC10818	;Male
11612.p1||5_114473324_A_C	5_114473324_A_C	11612.p1||5_114473324_A_C||hg19.ET-55521-3-42268-45930-46184-46422[.][12][UPT]	NDD	chr5	114473324	A	C	114473060	114473313	-	upstream	-11	0.982957	-0.0561129	intronic	TRIM36	.	.	.	.	.	.	.	.	.	.	.	.	.	.	.	.	.	.	11612.p1	Iossifov;ASC_v15_VCF	exome	autism	;11612		;11612.fa	;11612.mo	;Male
13760.p1||14_24843068_A_C	14_24843068_A_C	13760.p1||14_24843068_A_C||hg19.ET-4776-3-9432-9756-9929-10387[.][56][UPT]	NDD	chr14	24843068	A	C	24842901	24843073	+	exonic.5ss	-5	0.871575	-0.0559672	exonic	NFATC4	.	nonsynonymous SNV	NFATC4:NM_001198965:exon5:c.A1727C:p.E576A,NFATC4:NM_001198966:exon5:c.A1517C:p.E506A,NFATC4:NM_001288802:exon5:c.A1691C:p.E564A,NFATC4:NM_004554:exon5:c.A1727C:p.E576A,NFATC4:NM_001136022:exon6:c.A1916C:p.E639A,NFATC4:NM_001198967:exon6:c.A1916C:p.E639A,NFATC4:NM_001320043:exon6:c.A1916C:p.E639A	D	D	D	D	D	M	T	D	T	T	D	D	25.3	1.088	0.99	13760.p1	Krumm;ASC_v15_VCF	exome	autism	;13760		;SSC09424	;SSC09412	;Male
AC04-0020-01||20_34309818_G_C	20_34309818_G_C	AC04-0020-01||20_34309818_G_C||hg19.ET-9584-3-20767-23459-23597-28531[.][85][UPT][DNT]	NDD	chr20	34309818	G	C	34309662	34309799	-	upstream	-19	0.98374	-0.0559297	intronic	RBM39	.	.	.	.	.	.	.	.	.	.	.	.	.	.	.	.	.	.	AC04-0020-01	ASC_v15_VCF	exome	autism	AC04-0020-01		AC04-0020-02	AC04-0020-03	Male
14185.p1||8_82629464_T_C	8_82629464_T_C	14185.p1||8_82629464_T_C||hg19.ET-79752-3-6123-7016-7056-9190[.][63][UPT]	NDD	chr8	82629464	T	C	82629484	82629523	-	downstream	20	0.327596	-0.0555904	intronic	ZFAND1	.	.	.	.	.	.	.	.	.	.	.	.	.	.	.	.	.	.	14185.p1	ASC_v15_VCF	exome	autism	14185		SSC10576	SSC10571	Male
80001104439||2_27322060_A_C	2_27322060_A_C	80001104439||2_27322060_A_C||hg19.ET-3795-3-13907-15453-15542-15677[.][50][UPT][DNT]	NDD	chr2	27322060	A	C	27322064	27322152	+	upstream	-4	0.477393	-0.0555121	intronic	KHK	.	.	.	.	.	.	.	.	.	.	.	.	.	.	.	.	.	.	80001104439	ASC_v15_VCF	exome	autism	80001104439		80001104439-2	80001104439-1	Female
AC05-0002-01||16_2235199_A_C	16_2235199_A_C	AC05-0002-01||16_2235199_A_C||hg19.ET-57524-3-14158-14265-14354-14429[.][12]	NDD	chr16	2235199	A	C	2235112	2235200	-	exonic.3ss	1	0.980782	-0.0554254	exonic	CASKIN1	.	synonymous SNV	CASKIN1:NM_020764:exon12:c.T1152G:p.G384G	.	.	.	.	.	.	.	.	.	.	.	.	.	.	.	AC05-0002-01	DeRubeis2014;De_Rubeis_Nature_2014	exome	autism	;AC05-0002-01		;AC05-0002-02	;AC05-0002-03	;Male
DEASD_1007_001||17_3436237_G_T	17_3436237_G_T	DEASD_1007_001||17_3436237_G_T||hg19.ET-162514-3-25423-28058-28339-30792[.][20]	NDD	chr17	3436237	G	T	3435951	3436231	-	upstream	-6	0.959309	-0.0553563	intronic	TRPV3	.	.	.	.	.	.	.	.	.	.	.	.	.	.	.	.	.	.	DEASD_1007_001	ASC_v15_VCF	exome	autism	DEASD_1007_001		DEASD_1007_500	DEASD_1007_600	Male
11587.p1||17_76420174_G_A	17_76420174_G_A	11587.p1||17_76420174_G_A||hg19.ET-9489-3-44670-48407-48539-49264[.][1][UPT][DNT]	NDD	chr17	76420174	G	A	76420142	76420273	+	exonic.3ss	32	0.411476	-0.0547367	exonic	DNAH17	.	nonsynonymous SNV	DNAH17:NM_173628:exon81:c.C13202T:p.P4401L	.	D	P	N	D	H	T	.	T	T	T	D	33	1.048	0.864	11587.p1	SSC_Iossifov_2014	exome	autism	11587		11587.fa	11587.mo	Male
580|Lelieveld_580||3_179082192_C_T	3_179082192_C_T	580|Lelieveld_580||3_179082192_C_T||hg19.ET-55669-3-17791-19605-19714-20426[.][24][UPT]	NDD	chr3	179082192	C	T	179082085	179082193	+	exonic.5ss	-1	0.97994	-0.0545735	exonic	MFN1	.	nonsynonymous SNV	MFN1:NM_033540:exon6:c.C644T:p.T215M	D	D	D	D	D	L	D	D	D	D	D	D	32	0.935	1	580|Lelieveld_580	Heyne_2018;Lelieveld2016	exome	ID;intellectualDisability		simplex;			female;
Kun-Rodrigues2||12_110465560_G_T	12_110465560_G_T	Kun-Rodrigues2||12_110465560_G_T||hg19.ET-88455-3-29394-31275-31337-32082[.][14][UPT]	NDD	chr12	110465560	G	T	110465510	110465571	+	exonic.5ss	-11	0.38032	-0.0545326	exonic	ANKRD13A	.	nonsynonymous SNV	ANKRD13A:NM_033121:exon9:c.G934T:p.G312C	D	D	D	D	D	M	T	D	T	T	T	D	33	1.048	1	Kun-Rodrigues2	Kun-Rodrigues	exome	early_onset_parkinson
F10267-1||1_22215188_C_G	1_22215188_C_G	F10267-1||1_22215188_C_G||hg19.ET-3339-3-50277-51539-51590-52191[.][1]	NDD	chr1	22215188	C	G	22215161	22215211	-	exonic.3ss	23	0.427825	-0.0543558	intronic	HSPG2	.	.	.	.	.	.	.	.	.	.	.	.	.	.	.	.	.	.	F10267-1	ASC_v15_VCF	exome	autism	F10267-1		F10267-3	F10267-2	Female
94||15_48902995_T_A	15_48902995_T_A	94||15_48902995_T_A||hg19.ET-2200-3-35779-37962-38061-48554[.][14][DNT]	NDD	chr15	48902995	T	A	48902925	48903023	-	exonic.3ss	28	0.979246	-0.0541807	exonic	FBN1	.	synonymous SNV	FBN1:NM_000138:exon4:c.A276T:p.G92G	.	.	.	.	.	.	.	.	.	.	.	.	.	.	.	94	Heyne_2018	exome	ID		simplex			male
Lelieveld_94||15_48902995_T_A	15_48902995_T_A	Lelieveld_94||15_48902995_T_A||hg19.ET-2200-3-35779-37962-38061-48554[.][14][DNT]	NDD	chr15	48902995	T	A	48902925	48903023	-	exonic.3ss	28	0.979246	-0.0541807	exonic	FBN1	.	synonymous SNV	FBN1:NM_000138:exon4:c.A276T:p.G92G	.	.	.	.	.	.	.	.	.	.	.	.	.	.	.	Lelieveld_94	Lelieveld2016	exome	intellectualDisability
DDDP100208||10_118466781_G_A	10_118466781_G_A	DDDP100208||10_118466781_G_A||hg19.ET-259217-3-3145-38289-38375-40296[.][12][UPT][DNT]	NDD	chr10	118466781	G	A	118466711	118466796	-	exonic.3ss	15	0.940808	-0.0541508	exonic	HSPA12A	.	nonsynonymous SNV	HSPA12A:NM_025015:exon2:c.C56T:p.S19F,HSPA12A:NM_001330164:exon3:c.C107T:p.S36F	D	B	B	D	D	L	T	N	T	T	T	D	29.1	0.953	1	DDDP100208	Heyne_2018	exome	DD		simplex			female
08C78818||12_109366259_G_T	12_109366259_G_T	08C78818||12_109366259_G_T||hg19.ET-55530-3-90672-95593-95665-107022[.][11][DNT]	NDD	chr12	109366259	G	T	109366181	109366252	-	upstream	-7	0.984748	-0.0540346	intronic	SVOP	.	.	.	.	.	.	.	.	.	.	.	.	.	.	.	.	.	.	08C78818	ASC_v15_VCF	exome	autism	08C78818		08C77699	08C78819	Male
ASC_CA_133_A||1_42915624_G_A	1_42915624_G_A	ASC_CA_133_A||1_42915624_G_A||hg19.ET-84217-3-3380-9208-9350-10629[.][37][UPT][DNT]	NDD	chr1	42915624	G	A	42915589	42915730	-	exonic.5ss	-35	0.307132	-0.0539684	exonic	ZMYND12	.	nonsynonymous SNV	ZMYND12:NM_001146192:exon2:c.C59T:p.T20M,ZMYND12:NM_032257:exon2:c.C217T:p.R73W	D	D	D	D	D	M	T	D	T	T	D	D	25.3	0.045	0.969	ASC_CA_133_A	ASC_v15_VCF	exome	autism	ASC_CA_133_A		ASC_CA_133_M	ASC_CA_133_P	Male
DDDP109354||5_64976535_T_C	5_64976535_T_C	DDDP109354||5_64976535_T_C||hg19.ET-54557-3-39747-44320-44459-44558[.][7]	NDD	chr5	64976535	T	C	64976483	64976621	-	exonic.5ss	-52	0.963689	-0.0538907	exonic	SGTB	.	nonsynonymous SNV	SGTB:NM_019072:exon7:c.A566G:p.Y189C	D	D	D	D	D	M	T	D	T	T	D	D	26.9	1.061	0.997	DDDP109354	Heyne_2018	exome	DD		simplex			male
DDDP112928||7_79764594_G_C	7_79764594_G_C	DDDP112928||7_79764594_G_C||hg19.ET-2770-3-2745-3182-3455-57127[.][2][UPT]	NDD	chr7	79764594	G	C	79764322	79764594	+	exonic.5ss	0	0.492249	-0.053624	exonic	GNAI1	.	nonsynonymous SNV	GNAI1:NM_002069:exon1:c.G118C:p.G40R	D	D	D	D	D	H	D	D	D	D	.	D	29.3	0.783	0.941	DDDP112928	Heyne_2018	exome	DD		simplex			female
CC1098.201||17_36656833_C_G	17_36656833_C_G	CC1098.201||17_36656833_C_G||hg19.ET-57636-3-73033-75119-75151-84460[.][19][DNT]	NDD	chr17	36656833	C	G	36656839	36656870	+	upstream	-6	0.979409	-0.0533923	intronic	ARHGAP23	.	.	.	.	.	.	.	.	.	.	.	.	.	.	.	.	.	.	CC1098.201	ASC_v15_VCF	exome	autism	CC1098		CC1098.102	CC1098.101	Male
DDDP116674||14_77896065_G_A	14_77896065_G_A	DDDP116674||14_77896065_G_A||hg19.ET-63894-3-26799-30873-30960-31545[.][30][UPT]	NDD	chr14	77896065	G	A	77896024	77896110	-	exonic.5ss	-41	0.976747	-0.0532758	exonic	VIPAS39	.	nonsynonymous SNV	VIPAS39:NM_001193316:exon16:c.C1078T:p.R360W,VIPAS39:NM_001193314:exon17:c.C1225T:p.R409W,VIPAS39:NM_001193315:exon17:c.C1225T:p.R409W,VIPAS39:NM_001193317:exon17:c.C1225T:p.R409W,VIPAS39:NM_022067:exon18:c.C1225T:p.R409W	D	D	D	D	D	M	T	D	T	T	D	D	24.9	1.048	0.998	DDDP116674	Heyne_2018	exome	DD		simplex			female
DDDP118522||2_210561075_G_T	2_210561075_G_T	DDDP118522||2_210561075_G_T||hg19.ET-4133-3-275304-275495-275702-275870[.][7]	NDD	chr2	210561075	G	T	210561266	210561472	+	upstream	-191	0.958475	-0.0531357	splicing	MAP2	NM_002374:exon7:c.4180+1G>T	.	.	.	.	.	.	D	.	.	.	.	.	.	D	24.3	1.048	0.996	DDDP118522	Heyne_2018	exome	DD		simplex			male
08C72821||3_12183415_C_G	3_12183415_C_G	08C72821||3_12183415_C_G||hg19.ET-6854-3-139347-140543-140635-144317[.][21][UPT]	NDD	chr3	12183415	C	G	12183405	12183496	+	exonic.3ss	10	0.98303	-0.0531168	exonic	SYN2	.	unknown	UNKNOWN	.	.	.	N	A	.	.	.	.	.	.	D	16.5	0.852	1	08C72821	ASC_v15_VCF	exome	autism	08C72821		08C72847	08C72822	Male
13700.p1||19_46808554_G_A	19_46808554_G_A	13700.p1||19_46808554_G_A||hg19.ET-64344-3-10043-11199-11345-14175[.][62][UPT]	NDD	chr19	46808554	G	A	46808502	46808647	+	exonic.3ss	52	0.794623	-0.0531163	exonic	HIF3A	.	synonymous SNV	HIF3A:NM_152794:exon3:c.G264A:p.L88L,HIF3A:NM_152795:exon3:c.G270A:p.L90L	.	.	.	.	.	.	.	.	.	.	.	.	.	.	.	13700.p1	Iossifov;ASC_v15_VCF	exome	autism	;13700		;13700.fa	;13700.mo	;Male
08C76677||9_131235169_C_G	9_131235169_C_G	08C76677||9_131235169_C_G||hg19.ET-4957-3-19314-20758-20888-21455[.][59]	NDD	chr9	131235169	C	G	131235192	131235321	+	upstream	-23	0.532242	-0.0530694	ncRNA_intronic	MIR1268A	.	.	.	.	.	.	.	.	.	.	.	.	.	.	.	.	.	.	08C76677	ASC_v15_VCF	exome	autism	08C76677		08C77234	08C76675	Male
408||18_51807053_C_T	18_51807053_C_T	408||18_51807053_C_T||hg19.ET-11201-3-11377-14188-14425-16358[.][18]	NDD	chr18	51807053	C	T	51807037	51807273	+	exonic.3ss	16	0.935156	-0.0530259	exonic	POLI	.	synonymous SNV	POLI:NM_001351610:exon4:c.C450T:p.D150D,POLI:NM_001351614:exon4:c.C267T:p.D89D,POLI:NM_001351615:exon4:c.C267T:p.D89D,POLI:NM_001351617:exon4:c.C33T:p.D11D,POLI:NM_001351611:exon5:c.C372T:p.D124D,POLI:NM_001351612:exon5:c.C372T:p.D124D,POLI:NM_001351618:exon5:c.C33T:p.D11D,POLI:NM_001351619:exon5:c.C33T:p.D11D,POLI:NM_001351621:exon5:c.C576T:p.D192D,POLI:NM_001351632:exon5:c.C501T:p.D167D,POLI:NM…	.	.	.	.	.	.	.	.	.	.	.	.	.	.	.	408	Heyne_2018	exome	ID		simplex			male
Lelieveld_408||18_51807053_C_T	18_51807053_C_T	Lelieveld_408||18_51807053_C_T||hg19.ET-11201-3-11377-14188-14425-16358[.][18]	NDD	chr18	51807053	C	T	51807037	51807273	+	exonic.3ss	16	0.935156	-0.0530259	exonic	POLI	.	synonymous SNV	POLI:NM_001351610:exon4:c.C450T:p.D150D,POLI:NM_001351614:exon4:c.C267T:p.D89D,POLI:NM_001351615:exon4:c.C267T:p.D89D,POLI:NM_001351617:exon4:c.C33T:p.D11D,POLI:NM_001351611:exon5:c.C372T:p.D124D,POLI:NM_001351612:exon5:c.C372T:p.D124D,POLI:NM_001351618:exon5:c.C33T:p.D11D,POLI:NM_001351619:exon5:c.C33T:p.D11D,POLI:NM_001351621:exon5:c.C576T:p.D192D,POLI:NM_001351632:exon5:c.C501T:p.D167D,POLI:NM…	.	.	.	.	.	.	.	.	.	.	.	.	.	.	.	Lelieveld_408	Lelieveld2016	exome	intellectualDisability
DDDP111977||11_681082_G_A	11_681082_G_A	DDDP111977||11_681082_G_A||hg19.ET-10522-3-13843-17651-17778-18924[.][46][UPT]	NDD	chr11	681082	G	A	680963	681089	-	exonic.3ss	7	0.967632	-0.0529829	exonic	DEAF1	.	nonsynonymous SNV	DEAF1:NM_021008:exon7:c.C878T:p.P293L	D	D	D	D	D	L	T	D	D	T	D	D	28	1.045	0.841	DDDP111977	Heyne_2018	exome	DD		simplex			female
DDDP100327||6_2770384_A_G	6_2770384_A_G	DDDP100327||6_2770384_A_G||hg19.ET-56897-3-6451-7688-7930-16831[.][25][DNT]	NDD	chr6	2770384	A	G	2770354	2770595	+	exonic.3ss	30	0.951303	-0.0528474	exonic	WRNIP1	.	nonsynonymous SNV	WRNIP1:NM_020135:exon3:c.A1045G:p.T349A	D	P	P	D	D	L	T	D	T	T	T	D	24.8	1.199	0.995	DDDP100327	Heyne_2018	exome	DD		simplex			male
13808.p1||14_105351707_T_G	14_105351707_T_G	13808.p1||14_105351707_T_G||hg19.ET-283638-3-22237-23056-23230-23727[.][4][UPT]	NDD	chr14	105351707	T	G	105351706	105351879	+	exonic.3ss	1	0.978546	-0.0528063	exonic	CEP170B	.	nonsynonymous SNV	CEP170B:NM_015005:exon9:c.T1562G:p.V521G,CEP170B:NM_001112726:exon10:c.T1772G:p.V591G	D	D	D	U	D	M	T	D	T	T	D	D	26.7	0.909	0.992	13808.p1	ASC_v15_VCF	exome	autism	13808		SSC09494	SSC09493	Male
DDDP114129||7_103202338_G_A	7_103202338_G_A	DDDP114129||7_103202338_G_A||hg19.ET-5649-3-427239-430563-430704-430807[.][5]	NDD	chr7	103202338	G	A	103202260	103202400	-	exonic.3ss	62	0.967939	-0.0527243	exonic	RELN	.	nonsynonymous SNV	RELN:NM_005045:exon35:c.C5273T:p.A1758V,RELN:NM_173054:exon35:c.C5273T:p.A1758V	D	D	D	D	D	M	T	N	T	T	D	D	29.3	1.048	0.968	DDDP114129	Heyne_2018	exome	DD		simplex			female
DDDP112031||15_56683592_G_A	15_56683592_G_A	DDDP112031||15_56683592_G_A||hg19.ET-374618-3-26955-28797-28973-31719[.][11][UPT][DNT]	NDD	chr15	56683592	G	A	56683441	56683616	+	exonic.5ss	-24	0.956469	-0.0526951	exonic	TEX9	.	nonsynonymous SNV	TEX9:NM_001286449:exon7:c.G322A:p.G108S,TEX9:NM_198524:exon7:c.G547A:p.G183S	T	P	B	D	D	L	.	N	T	T	T	D	19.95	0.978	0.868	DDDP112031	Heyne_2018	exome	DD		simplex			male
200675594@1082034690||2_39184185_A_G	2_39184185_A_G	200675594@1082034690||2_39184185_A_G||hg19.ET-100271715-3-38094-40536-40685-41671[.][5][UPT]	NDD	chr2	39184185	A	G	39184040	39184188	+	exonic.5ss	-3	0.952675	-0.0525053	exonic	ARHGEF33	.	nonsynonymous SNV	ARHGEF33:NM_001145451:exon12:c.A1367G:p.K456R	D	B	B	.	D	N	T	N	T	T	T	D	20.3	1.199	1	200675594@1082034690	ASC_v15_VCF	exome	autism	200675594@1082034690		200675592@1082034992	200675593@1082034641	Male
14286.p1||1_100742858_C_T	1_100742858_C_T	14286.p1||1_100742858_C_T||hg19.ET-8634-3-12566-14100-14159-22070[.][36][UPT]	NDD	chr1	100742858	C	T	100742814	100742872	+	exonic.5ss	-14	0.983976	-0.0524056	exonic	RTCA	.	nonsynonymous SNV	RTCA:NM_003729:exon8:c.C785T:p.S262L,RTCA:NM_001130841:exon9:c.C824T:p.S275L	D	B	B	D	D	M	.	D	T	T	T	D	26.9	0.935	0.972	14286.p1	Iossifov;ASC_v15_VCF	exome	autism	;14286		;14286.fa	;14286.mo	;Male
NDAR_INVCK592EMP_wes1||10_76729751_A_G	10_76729751_A_G	NDAR_INVCK592EMP_wes1||10_76729751_A_G||hg19.ET-23522-3-146363-146607-146689-149094[.][18]	NDD	chr10	76729751	A	G	76729778	76729859	+	upstream	-27	0.966844	-0.0522658	intronic	KAT6B	.	.	.	.	.	.	.	.	.	.	.	.	.	.	.	.	.	.	NDAR_INVCK592EMP_wes1	De_Rubeis_Nature_2014	exome	autism	NDAR_INVCK592EMP_wes1		NDAR_INVZZ196LJ7_wes1	NDAR_INVHN053CP6_wes1	Male
4B858||20_47253073_G_A	20_47253073_G_A	4B858||20_47253073_G_A||hg19.ET-57580-3-193172-194199-194420-196107[.][29]	NDD	chr20	47253073	G	A	47253001	47253221	-	exonic.5ss	-72	0.980574	-0.0522464	exonic	PREX1	.	synonymous SNV	PREX1:NM_020820:exon32:c.C4095T:p.R1365R	.	.	.	.	.	.	.	.	.	.	.	.	.	.	.	4B858	ASC_v15_VCF	exome	autism	4B858		4B860	4B859	Male
13060.p1||19_13246969_T_C	19_13246969_T_C	13060.p1||19_13246969_T_C||hg19.ET-112939-3-20866-20944-21118-21983[.][7]	NDD	chr19	13246969	T	C	13247046	13247219	+	upstream	-77	0.978016	-0.0522257	splicing	NACC1	NM_052876:exon2:c.946+2T>C	.	.	.	.	.	.	D	.	.	.	.	.	.	D	22.8	0.8	0.876	13060.p1	Iossifov;ASC_v15_VCF	exome	autism	;13060		;SSC06586	;SSC06574	;Male
200675453@1082034446||16_89613072_C_T	16_89613072_C_T	200675453@1082034446||16_89613072_C_T||hg19.ET-6687-3-39376-41261-41364-42606[.][46][UPT][DNT]	NDD	chr16	89613072	C	T	89613066	89613168	+	exonic.3ss	6	0.973026	-0.0522199	exonic	SPG7	.	nonsynonymous SNV	SPG7:NM_003119:exon11:c.C1456T:p.R486W	D	D	P	D	D	M	D	D	D	D	D	D	34	0.064	0.989	200675453@1082034446	ASC_v15_VCF	exome	autism	200675453@1082034446		200675451@1082034631	200675452@1082034413	Female
XH678||5_41939696_A_G	5_41939696_A_G	XH678||5_41939696_A_G||hg19.ET-26272-3-12055-17187-17363-18938[.][13][DNT]	NDD	chr5	41939696	A	G	41939543	41939718	+	exonic.5ss	-22	0.640918	-0.0522143	exonic	FBXO4	.	nonsynonymous SNV	FBXO4:NM_012176:exon6:c.A1052G:p.N351S	T	B	B	N	D	N	T	N	T	T	T	D	6.928	-0.121	0.927	XH678	ASC_v15_VCF	exome	autism	XH678		4G086	4G085	Male
G01-GEA-111-HI||4_95155100_T_G	4_95155100_T_G	G01-GEA-111-HI||4_95155100_T_G||hg19.ET-56916-3-21689-29346-29515-32344[.][15][DNT]	NDD	chr4	95155100	T	G	95155105	95155273	+	upstream	-5	0.965397	-0.0521558	intronic	SMARCAD1	.	.	.	.	.	.	.	.	.	.	.	.	.	.	.	.	.	.	G01-GEA-111-HI	ASC_v15_VCF	exome	autism	G01-GEA-111-HI		G01-GEA-111-PA	G01-GEA-111-MA	Male
12303.p1||12_49220135_T_G	12_49220135_T_G	12303.p1||12_49220135_T_G||hg19.ET-784-3-14338-14935-15087-15327[.][33]	NDD	chr12	49220135	T	G	49220150	49220301	+	upstream	-15	0.943211	-0.0519199	intronic	CACNB3	.	.	.	.	.	.	.	.	.	.	.	.	.	.	.	.	.	.	12303.p1	SSC_Iossifov_2014	exome	autism	12303		12303.fa	12303.mo	Male
11C119404||12_110418851_C_A	12_110418851_C_A	11C119404||12_110418851_C_A||hg19.ET-9815-3-16017-18343-18438-31886[.][41][DNT]	NDD	chr12	110418851	C	A	110418757	110418851	-	exonic.3ss	0	0.981987	-0.0518896	exonic	GIT2	.	nonsynonymous SNV	GIT2:NM_001135213:exon7:c.G624T:p.R208S,GIT2:NM_001135214:exon7:c.G624T:p.R208S,GIT2:NM_001330153:exon7:c.G624T:p.R208S,GIT2:NM_001330154:exon7:c.G624T:p.R208S,GIT2:NM_014776:exon7:c.G624T:p.R208S,GIT2:NM_057169:exon7:c.G624T:p.R208S,GIT2:NM_057170:exon7:c.G624T:p.R208S,GIT2:NM_139201:exon7:c.G624T:p.R208S	T	B	B	D	D	L	T	D	T	T	.	D	25.7	0.852	1	11C119404	ASC_v15_VCF	exome	autism	11C119404		11C119403	11C119402	Male
10C116708||5_14485178_G_C	5_14485178_G_C	10C116708||5_14485178_G_C||hg19.ET-7204-3-342054-344349-344527-346744[.][5][UPT][DNT]	NDD	chr5	14485178	G	C	14485178	14485355	+	exonic.3ss	0	0.973986	-0.0518432	exonic	TRIO	.	nonsynonymous SNV	TRIO:NM_007118:exon47:c.G6658C:p.V2220L	T	B	B	D	D	L	T	N	T	T	T	D	21.4	0.953	0.994	10C116708	DeRubeis2014;ASC_v15_VCF	exome	autism	;10C116708		;10C116707	;10C116706	;Male
DDDP110496||4_169204701_G_A	4_169204701_G_A	DDDP110496||4_169204701_G_A||hg19.ET-55601-3-36988-38201-38362-41217[.][7]	NDD	chr4	169204701	G	A	169204597	169204757	-	exonic.3ss	56	0.9792	-0.0518341	exonic	DDX60	.	nonsynonymous SNV	DDX60:NM_017631:exon13:c.C1618T:p.R540W	D	D	P	N	N	M	T	D	T	T	D	N	27.5	0.883	0.934	DDDP110496	Heyne_2018	exome	DD		simplex			male
14604.p1||11_20117286_C_T	11_20117286_C_T	14604.p1||11_20117286_C_T||hg19.ET-89797-3-745475-747947-748043-749852[.][20]	NDD	chr11	20117286	C	T	20117218	20117313	+	exonic.5ss	-27	0.978685	-0.0515076	exonic	NAV2	.	synonymous SNV	NAV2:NM_001111019:exon20:c.C3177T:p.L1059L,NAV2:NM_001111018:exon30:c.C5793T:p.L1931L,NAV2:NM_145117:exon30:c.C5985T:p.L1995L,NAV2:NM_182964:exon30:c.C5994T:p.L1998L,NAV2:NM_001244963:exon32:c.C6162T:p.L2054L	.	.	.	.	.	.	.	.	.	.	.	.	.	.	.	14604.p1	Iossifov;ASC_v15_VCF	exome	autism	;14604		;37428	;37430	;Male
14505.p1||6_135754219_G_T	6_135754219_G_T	14505.p1||6_135754219_G_T||hg19.ET-54806-3-62391-67509-67739-69451[.][17]	NDD	chr6	135754219	G	T	135754165	135754394	-	exonic.5ss	-54	0.971316	-0.0514776	exonic	AHI1	.	synonymous SNV	AHI1:NM_001134830:exon14:c.C2212A:p.R738R,AHI1:NM_001134832:exon15:c.C2212A:p.R738R,AHI1:NM_017651:exon15:c.C2212A:p.R738R,AHI1:NM_001134831:exon16:c.C2212A:p.R738R,AHI1:NM_001350503:exon16:c.C2212A:p.R738R,AHI1:NM_001350504:exon16:c.C2212A:p.R738R	.	.	.	.	.	.	.	.	.	.	.	.	.	.	.	14505.p1	Iossifov;Heyne_2018;SSC_Iossifov_2014	exome	autism;ASD	;14505	;simplex	;14505.fa	;14505.mo	;male;Male
G01-GEA-312-HI||8_113504881_G_A	8_113504881_G_A	G01-GEA-312-HI||8_113504881_G_A||hg19.ET-114788-3-936224-947330-947525-967306[.][7]	NDD	chr8	113504881	G	A	113504718	113504912	-	exonic.3ss	31	0.978272	-0.0513868	exonic	CSMD3	.	synonymous SNV	CSMD3:NM_052900:exon30:c.C4803T:p.G1601G,CSMD3:NM_198123:exon31:c.C5115T:p.G1705G,CSMD3:NM_198124:exon32:c.C4995T:p.G1665G	.	.	.	.	.	.	.	.	.	.	.	.	.	.	.	G01-GEA-312-HI	ASC_v15_VCF	exome	autism	G01-GEA-312-HI		G01-GEA-312-PA	G01-GEA-312-MA	Male
09C88928||3_48620021_C_T	3_48620021_C_T	09C88928||3_48620021_C_T||hg19.ET-1294-3-15148-15507-15552-15647[.][2]	NDD	chr3	48620021	C	T	48620042	48620086	-	downstream	21	0.950199	-0.0509695	intronic	COL7A1	.	.	.	.	.	.	.	.	.	.	.	.	.	.	.	.	.	.	09C88928	ASC_v15_VCF	exome	autism	09C88928		09C88929	09C88930	Male
11704.p1||9_133952690_A_G	9_133952690_A_G	11704.p1||9_133952690_A_G||hg19.ET-10319-3-69849-71070-71218-73032[.][8]	NDD	chr9	133952690	A	G	133952574	133952721	+	exonic.5ss	-31	0.952917	-0.0507794	exonic	LAMC3	.	nonsynonymous SNV	LAMC3:NM_006059:exon22:c.A3746G:p.Y1249C	T	B	B	N	N	N	T	N	T	T	T	N	0.013	-0.638	0	11704.p1	Heyne_2018;ASC_v15_VCF	exome	ASD;autism	;11704	simplex;	;11704.fa	;11704.mo	male;Male
DDDP111269||5_150646369_C_G	5_150646369_C_G	DDDP111269||5_150646369_C_G||hg19.ET-2760-3-9865-16679-16862-17244[.][222][UPT][DNT]	NDD	chr5	150646369	C	G	150646292	150646474	+	exonic.3ss	77	0.976473	-0.0507045	exonic	GM2A	.	synonymous SNV	GM2A:NM_000405:exon3:c.C321G:p.T107T,GM2A:NM_001167607:exon3:c.C321G:p.T107T	.	.	.	.	.	.	.	.	.	.	.	.	.	.	.	DDDP111269	Heyne_2018	exome	DD		simplex			female
13309.p1||1_169094277_G_A	1_169094277_G_A	13309.p1||1_169094277_G_A||hg19.ET-481-3-7790-21175-21331-23515[.][228][UPT][DNT]	NDD	chr1	169094277	G	A	169094122	169094277	+	exonic.5ss	0	0.984355	-0.0506772	exonic	ATP1B1	.	nonsynonymous SNV	ATP1B1:NM_001677:exon3:c.G382A:p.D128N	T	B	B	N	N	M	T	N	T	T	.	D	13.68	0.125	0.988	13309.p1	ASC_v15_VCF	exome	autism	13309		SSC06942	SSC06939	Male
12929.p1||3_155551287_G_A	3_155551287_G_A	12929.p1||3_155551287_G_A||hg19.ET-9197-3-23603-23874-23992-27556[.][19][UPT]	NDD	chr3	155551287	G	A	155551257	155551374	-	exonic.5ss	-30	0.938032	-0.0505872	exonic	SLC33A1	.	synonymous SNV	SLC33A1:NM_001190992:exon4:c.C1236T:p.I412I,SLC33A1:NM_004733:exon4:c.C1236T:p.I412I	.	.	.	.	.	.	.	.	.	.	.	.	.	.	.	12929.p1	Iossifov;ASC_v15_VCF	exome	autism	;12929		;SSC06637	;SSC06620	;Male
ASC_CA_179_A||12_109614036_A_G	12_109614036_A_G	ASC_CA_179_A||12_109614036_A_G||hg19.ET-32-3-39644-39756-39867-42691[.][11]	NDD	chr12	109614036	A	G	109613958	109614068	+	exonic.5ss	-32	0.96291	-0.050264	exonic	ACACB	.	nonsynonymous SNV	ACACB:NM_001093:exon8:c.A1405G:p.S469G	T	B	B	N	D	L	D	N	D	D	D	D	17.84	1.199	0.999	ASC_CA_179_A	ASC_v15_VCF	exome	autism	ASC_CA_179_A		ASC_CA_179_P	ASC_CA_179_M	Male
