# Supplementary material for: Reference-informed prediction of alternative splicing and splicing-altering mutations from sequences
Source: HighWire-hosted journal article supplement (doi:10.1101/gr.279044.124), 2024-07-01
Supplement: Supplemental_Table_S9.xlsx [file Supplemental_Table_S9.xlsx]

## Sheet: Table S2
Supplemental Table S9. Significant NDD-risk genes predicted by de novo mutation burdens.
Gene Symbol	Emsembl ID	LGD rate	D-mis rate	Splicing rate	LGD variants	D-mis variants	Splicing variants	Model 1 (LGD + D-mis)						Model 2 (LGD + D-mis + Splicing)					Splicing-altering genes
								Rate	Lower 95% CI	Upper 95% CI	P-value	FDR		Rate	Lower 95% CI	Upper 95% CI	P-value	FDR
SCN2A	ENSG00000136531	4.52018e-06	2.63977e-05	1.98293e-06	18	28	3	0.0014253	0.0010435	0.00190114	6.19816e-59	1.28909e-54		0.00151825	0.00112321	0.00200721	1.09893e-62	2.28555e-58	TRUE
DDX3X	ENSG00000215301	1.80344e-06	1.04073e-05	3.3117e-06	16	11	0	0.000836587	0.000551316	0.00121719	7.56969e-40	7.87172e-36		0.000836587	0.000551316	0.00121719	4.44866e-37	4.62616e-33	FALSE
ARID1B	ENSG00000049618	4.67319e-06	3.00657e-05	2.18736e-06	27	2	2	0.000898556	0.000601777	0.00129048	1.0555e-30	7.31743e-27		0.000960526	0.00065263	0.00136339	8.82462e-33	6.11781e-29	TRUE
SLC6A1	ENSG00000157103	1.40129e-06	1.01695e-05	2.37134e-06	3	17	1	0.000619694	0.000378525	0.000957067	8.01302e-28	4.16637e-24		0.000650679	0.00040278	0.000994631	6.6378e-28	3.45132e-24	TRUE
MLL		9.68553e-07	4.36559e-06	5.11065e-07	11	5	0	0.000495755	0.000283367	0.000805075	2.41942e-26	1.00638e-22		0.000495755	0.000283367	0.000805075	1.02977e-25	4.28343e-22	FALSE
PPP2R5D	ENSG00000112640	1.76186e-06	1.03342e-05	1.04257e-06	0	19	0	0.000588709	0.000354441	0.000919342	9.82545e-26	3.40583e-22		0.000588709	0.000354441	0.000919342	4.57826e-25	1.58698e-21	FALSE
FOXP1	ENSG00000114861	2.28599e-06	1.13991e-05	3.63878e-06	8	10	2	0.000557724	0.000330543	0.000881445	4.20585e-23	7.95212e-20		0.000619694	0.000378525	0.000957067	2.15137e-24	6.39203e-21	TRUE
GRIN2B	ENSG00000273079	2.55956e-06	2.26847e-05	7.15491e-07	5	17	0	0.000681663	0.000427195	0.00103205	4.50171e-24	1.0403e-20		0.000681663	0.000427195	0.00103205	8.14392e-24	2.11722e-20	FALSE
MECP2	ENSG00000169057	9.25212e-07	6.21263e-06	1.32877e-06	8	8	0	0.000495755	0.000283367	0.000805075	2.42086e-24	7.19272e-21		0.000495755	0.000283367	0.000805075	3.57058e-23	8.25121e-20	FALSE
KCNQ2	ENSG00000281151	1.93673e-06	1.9199e-05	3.37303e-06	0	21	0	0.000650679	0.00040278	0.000994631	3.3139e-24	8.61531e-21		0.000650679	0.00040278	0.000994631	6.69367e-23	1.39215e-19	FALSE
STXBP1	ENSG00000136854	1.69274e-06	1.13862e-05	1.90116e-06	3	15	0	0.000557724	0.000330543	0.000881445	1.89558e-23	3.94243e-20		0.000557724	0.000330543	0.000881445	2.05819e-22	3.89148e-19	FALSE
SYNGAP1	ENSG00000227460	3.34791e-06	2.422e-05	2.63709e-06	13	5	3	0.000557724	0.000330543	0.000881445	8.21584e-18	1.06796e-14		0.000650679	0.00040278	0.000994631	4.52374e-21	7.8404e-18	TRUE
TCF4	ENSG00000196628	1.90068e-06	1.26431e-05	4.72224e-06	8	6	4	0.000433786	0.000237155	0.000727819	1.86612e-16	2.19157e-13		0.000557724	0.000330543	0.000881445	1.6736e-20	2.6775e-17	TRUE
CSNK2A1	ENSG00000101266	2.00513e-06	6.51674e-06	2.41223e-06	0	15	0	0.00046477	0.000260128	0.000766568	2.30352e-21	3.99238e-18		0.00046477	0.000260128	0.000766568	9.00438e-20	1.33766e-16	FALSE
DYRK1A	ENSG00000157540	1.93127e-06	1.19062e-05	1.43098e-06	11	5	0	0.000495755	0.000283367	0.000805075	7.86184e-20	1.25777e-16		0.000495755	0.000283367	0.000805075	3.63487e-19	5.03987e-16	FALSE
SCN1A	ENSG00000144285	5.11285e-06	2.68258e-05	2.12603e-06	7	12	1	0.000588709	0.000354441	0.000919342	5.50019e-18	7.6262e-15		0.000619694	0.000378525	0.000957067	9.61272e-19	1.24953e-15	TRUE
ADNP	ENSG00000101126	2.0119e-06	7.88366e-06	4.90622e-07	13	1	0	0.000433786	0.000237155	0.000727819	9.77979e-19	1.45286e-15		0.000433786	0.000237155	0.000727819	1.89731e-18	2.32119e-15	FALSE
CHD8	ENSG00000100888	7.32169e-06	3.6093e-05	2.63709e-06	11	8	2	0.000588709	0.000354441	0.000919342	1.32165e-15	1.44672e-12		0.000650679	0.00040278	0.000994631	1.95227e-17	2.25574e-14	TRUE
DNMT3A	ENSG00000119772	2.49694e-06	1.59941e-05	1.53319e-06	1	14	0	0.00046477	0.000260128	0.000766568	1.89673e-16	2.19157e-13		0.00046477	0.000260128	0.000766568	5.98167e-16	6.54772e-13	FALSE
GNAO1	ENSG00000087258	8.2934e-07	7.33298e-06	1.57408e-06	1	10	1	0.000340832	0.000170142	0.000609842	8.34433e-15	8.26407e-12		0.000371816	0.000192123	0.000649488	1.44816e-15	1.50594e-12	TRUE
GATAD2B	ENSG00000261992	1.70166e-06	8.54869e-06	1.00169e-06	12	0	0	0.000371816	0.000192123	0.000649488	2.644e-15	2.7495e-12		0.000371816	0.000192123	0.000649488	7.85665e-15	7.78108e-12	FALSE
CTNNB1	ENSG00000168036	2.03398e-06	1.13933e-05	2.86196e-06	12	0	1	0.000371816	0.000192123	0.000649488	6.14099e-14	4.73038e-11		0.000402801	0.000214475	0.000688802	2.31089e-14	2.18463e-11	TRUE
POGZ	ENSG00000143442	3.6621e-06	1.57119e-05	1.61496e-06	12	2	0	0.000433786	0.000237155	0.000727819	8.94309e-15	8.45447e-12		0.000433786	0.000237155	0.000727819	2.6135e-14	2.36329e-11	FALSE
SCN8A	ENSG00000196876	4.33613e-06	3.28488e-05	1.73762e-06	2	15	0	0.00052674	0.000306845	0.000843361	2.0152e-14	1.82227e-11		0.00052674	0.000306845	0.000843361	4.15516e-14	3.60079e-11	FALSE
EEF1A2	ENSG00000101210	7.99216e-07	1.1655e-05	6.54163e-07	0	12	0	0.000371816	0.000192123	0.000649488	2.56294e-14	2.221e-11		0.000371816	0.000192123	0.000649488	4.64607e-14	3.86516e-11	FALSE
ASXL3	ENSG00000141431	3.78601e-06	1.38111e-05	1.28788e-06	13	0	0	0.000402801	0.000214475	0.000688802	6.06497e-14	4.73038e-11		0.000402801	0.000214475	0.000688802	1.46183e-13	1.16935e-10	FALSE
SETD5	ENSG00000168137	3.93417e-06	1.72623e-05	2.75975e-06	12	2	0	0.000433786	0.000237155	0.000727819	2.9808e-14	2.47979e-11		0.000433786	0.000237155	0.000727819	1.52233e-13	1.17265e-10	FALSE
SATB2	ENSG00000119042	1.63127e-06	1.25803e-05	1.1039e-06	5	7	0	0.000371816	0.000192123	0.000649488	1.18567e-13	8.80699e-11		0.000371816	0.000192123	0.000649488	2.81566e-13	2.09143e-10	FALSE
FOXG1	ENSG00000176165	4.52722e-07	1.11412e-05	6.13278e-08	3	8	0	0.000340832	0.000170142	0.000609842	3.58078e-13	2.40236e-10		0.000340832	0.000170142	0.000609842	3.78787e-13	2.71656e-10	FALSE
COL4A3BP		9.68553e-07	4.36559e-06	5.11065e-07	0	9	0	0.000278862	0.000127514	0.000529367	3.13515e-13	2.17349e-10		0.000278862	0.000127514	0.000529367	7.03784e-13	4.72171e-10	FALSE
MLL3		9.68553e-07	4.36559e-06	5.11065e-07	4	5	0	0.000278862	0.000127514	0.000529367	3.13515e-13	2.17349e-10		0.000278862	0.000127514	0.000529367	7.03784e-13	4.72171e-10	FALSE
CDK13	ENSG00000065883	3.60529e-06	1.96271e-05	1.45142e-06	3	10	0	0.000402801	0.000214475	0.000688802	1.89761e-12	1.19595e-09		0.000402801	0.000214475	0.000688802	3.99508e-12	2.59655e-09	FALSE
NAA10	ENSG00000102030	6.22316e-07	3.1227e-06	8.99474e-07	0	7	1	0.000216893	8.72022e-05	0.000446882	6.72703e-11	3.41241e-08		0.000247878	0.000107016	0.000488418	5.53336e-12	3.48736e-09	TRUE
CASK	ENSG00000147044	3.05098e-06	1.07516e-05	2.08514e-06	5	6	0	0.000340832	0.000170142	0.000609842	2.28405e-12	1.39717e-09		0.000340832	0.000170142	0.000609842	1.00952e-11	6.17529e-09	FALSE
IQSEC2	ENSG00000124313	2.75448e-06	2.38145e-05	1.34921e-06	5	8	0	0.000402801	0.000214475	0.000688802	9.83119e-12	5.6797e-09		0.000402801	0.000214475	0.000688802	1.79797e-11	1.06841e-08	FALSE
CHD2	ENSG00000173575	5.723e-06	2.59482e-05	3.12772e-06	7	7	0	0.000433786	0.000237155	0.000727819	6.01763e-12	3.57585e-09		0.000433786	0.000237155	0.000727819	2.04795e-11	1.18315e-08	FALSE
MLL4		9.68553e-07	4.36559e-06	5.11065e-07	1	7	0	0.000247878	0.000107016	0.000488418	1.6422e-11	8.98802e-09		0.000247878	0.000107016	0.000488418	3.36475e-11	1.89135e-08	FALSE
KCNQ3	ENSG00000184156	2.23981e-06	1.49762e-05	8.79032e-07	0	11	0	0.000340832	0.000170142	0.000609842	2.34794e-11	1.25211e-08		0.000340832	0.000170142	0.000609842	3.95671e-11	2.16557e-08	FALSE
SMARCA4	ENSG00000127616	4.50351e-06	3.63942e-05	3.41391e-06	0	15	0	0.00046477	0.000260128	0.000766568	1.43129e-11	8.0454e-09		0.00046477	0.000260128	0.000766568	4.29922e-11	2.2927e-08	FALSE
HDAC8	ENSG00000147099	1.23152e-06	5.23558e-06	2.92329e-06	3	6	0	0.000278862	0.000127514	0.000529367	1.7171e-12	1.11601e-09		0.000278862	0.000127514	0.000529367	4.5266e-11	2.35361e-08	FALSE
PURA	ENSG00000185129	5.76926e-07	9.57668e-06	1.83983e-07	0	9	0	0.000278862	0.000127514	0.000529367	8.94547e-11	4.42971e-08		0.000278862	0.000127514	0.000529367	1.04588e-10	5.30542e-08	FALSE
PACS1	ENSG00000175115	2.41419e-06	1.13853e-05	1.47187e-06	0	10	0	0.000309847	0.000148584	0.00056982	5.64757e-11	2.93645e-08		0.000309847	0.000148584	0.00056982	1.49047e-10	7.38067e-08	FALSE
KAT6B	ENSG00000281813	4.18626e-06	2.48852e-05	4.62003e-06	10	2	1	0.000371816	0.000192123	0.000649488	4.0961e-10	1.93615e-07		0.000402801	0.000214475	0.000688802	1.7428e-10	8.42948e-08	TRUE
TLK2	ENSG00000146872	3.24168e-06	1.05855e-05	2.10559e-06	3	6	1	0.000278862	0.000127514	0.000529367	1.29553e-09	5.49886e-07		0.000309847	0.000148584	0.00056982	2.2339e-10	1.05592e-07	TRUE
MED13L	ENSG00000123066	4.66265e-06	2.88886e-05	2.45311e-06	9	4	0	0.000402801	0.000214475	0.000688802	1.65772e-10	8.01797e-08		0.000402801	0.000214475	0.000688802	3.85628e-10	1.78229e-07	FALSE
GNAI1	ENSG00000127955	8.39695e-07	5.82243e-06	1.9216e-06	0	7	1	0.000216893	8.72022e-05	0.000446882	3.49337e-09	1.37085e-06		0.000247878	0.000107016	0.000488418	6.72868e-10	3.04224e-07	TRUE
CACNA1E	ENSG00000198216	6.38827e-06	3.92664e-05	1.77851e-06	2	12	0	0.000433786	0.000237155	0.000727819	6.62216e-10	3.06062e-07		0.000433786	0.000237155	0.000727819	1.07213e-09	4.74429e-07	FALSE
PHIP	ENSG00000146247	6.08265e-06	2.49216e-05	2.3509e-06	5	7	0	0.000371816	0.000192123	0.000649488	8.37446e-10	3.70579e-07		0.000371816	0.000192123	0.000649488	1.87769e-09	8.05995e-07	FALSE
TCF7L2	ENSG00000148737	2.18373e-06	1.06578e-05	1.61496e-06	5	4	0	0.000278862	0.000127514	0.000529367	6.85142e-10	3.09774e-07		0.000278862	0.000127514	0.000529367	1.89892e-09	8.05995e-07	FALSE
DYNC1H1	ENSG00000197102	1.15257e-05	8.55784e-05	5.5195e-06	1	17	1	0.000557724	0.000330543	0.000881445	6.9136e-09	2.61435e-06		0.000588709	0.000354441	0.000919342	2.73045e-09	1.13576e-06	TRUE
ITPR1	ENSG00000150995	7.07973e-06	4.09589e-05	4.64047e-06	1	13	0	0.000433786	0.000237155	0.000727819	1.25748e-09	5.44856e-07		0.000433786	0.000237155	0.000727819	3.98025e-09	1.62316e-06	FALSE
SMC1A	ENSG00000072501	3.39779e-06	1.74047e-05	9.60802e-07	6	4	0	0.000309847	0.000148584	0.00056982	2.7896e-09	1.13761e-06		0.000309847	0.000148584	0.00056982	4.26048e-09	1.70403e-06	FALSE
EP300	ENSG00000100393	6.51438e-06	2.96748e-05	1.61496e-06	6	5	1	0.000340832	0.000170142	0.000609842	4.75821e-08	1.54627e-05		0.000371816	0.000192123	0.000649488	7.39551e-09	2.89162e-06	TRUE
NACC1	ENSG00000160877	8.19996e-07	1.06501e-05	2.65754e-07	1	6	1	0.000216893	8.72022e-05	0.000446882	1.36837e-07	4.06562e-05		0.000247878	0.000107016	0.000488418	7.50782e-09	2.89162e-06	TRUE
GRIN2A	ENSG00000183454	2.30332e-06	1.96587e-05	1.32877e-06	1	9	0	0.000309847	0.000148584	0.00056982	4.63893e-09	1.78668e-06		0.000309847	0.000148584	0.00056982	8.02978e-09	2.9822e-06	FALSE
KDM5B	ENSG00000117139	5.3977e-06	2.20274e-05	2.84152e-06	5	6	0	0.000340832	0.000170142	0.000609842	2.91423e-09	1.16558e-06		0.000340832	0.000170142	0.000609842	7.92898e-09	2.9822e-06	FALSE
SMARCA2	ENSG00000080503	4.6337e-06	2.92569e-05	4.31339e-06	0	11	1	0.000340832	0.000170142	0.000609842	2.47316e-08	8.86841e-06		0.000371816	0.000192123	0.000649488	8.2921e-09	3.0256e-06	TRUE
PTEN	ENSG00000284792	1.09727e-06	4.84484e-06	1.94205e-06	4	3	0	0.000216893	8.72022e-05	0.000446882	1.60083e-09	6.65881e-07		0.000216893	8.72022e-05	0.000446882	1.09725e-08	3.93459e-06	FALSE
CDKL5	ENSG00000008086	2.15652e-06	1.01534e-05	9.60802e-07	3	5	0	0.000247878	0.000107016	0.000488418	1.08223e-08	4.01932e-06		0.000247878	0.000107016	0.000488418	1.92096e-08	6.77155e-06	FALSE
TBL1XR1	ENSG00000177565	1.46835e-06	5.80157e-06	2.26913e-06	0	6	1	0.000185908	6.8225e-05	0.000404644	1.89586e-07	5.55353e-05		0.000216893	8.72022e-05	0.000446882	3.97501e-08	1.37787e-05	TRUE
GABRB2	ENSG00000145864	1.22764e-06	7.46874e-06	1.16523e-06	0	7	0	0.000216893	8.72022e-05	0.000446882	2.13041e-08	7.77338e-06		0.000216893	8.72022e-05	0.000446882	4.97163e-08	1.69508e-05	FALSE
C12orf51		9.68553e-07	4.36559e-06	5.11065e-07	2	4	0	0.000185908	6.8225e-05	0.000404644	3.12023e-08	1.06878e-05		0.000185908	6.8225e-05	0.000404644	5.32695e-08	1.73109e-05	FALSE
EIF2C2		9.68553e-07	4.36559e-06	5.11065e-07	0	6	0	0.000185908	6.8225e-05	0.000404644	3.12023e-08	1.06878e-05		0.000185908	6.8225e-05	0.000404644	5.32695e-08	1.73109e-05	FALSE
KIAA0284		9.68553e-07	4.36559e-06	5.11065e-07	0	5	1	0.000154923	5.03032e-05	0.00036154	1.09202e-06	0.000294959		0.000185908	6.8225e-05	0.000404644	5.32695e-08	1.73109e-05	TRUE
WDR45	ENSG00000292221	1.08531e-06	4.25305e-06	4.66091e-06	5	1	1	0.000185908	6.8225e-05	0.000404644	3.1347e-08	1.06878e-05		0.000216893	8.72022e-05	0.000446882	5.4571e-08	1.7461e-05	TRUE
TNPO2	ENSG00000105576	2.17451e-06	1.20412e-05	1.67629e-06	0	8	0	0.000247878	0.000107016	0.000488418	3.24188e-08	1.08749e-05		0.000247878	0.000107016	0.000488418	7.53892e-08	2.37567e-05	FALSE
HECW2	ENSG00000138411	4.49288e-06	2.47153e-05	1.83983e-06	0	10	0	0.000309847	0.000148584	0.00056982	6.50155e-08	2.04878e-05		0.000309847	0.000148584	0.00056982	1.13514e-07	3.52368e-05	FALSE
PUF60	ENSG00000179950	1.32681e-06	8.31247e-06	1.83983e-06	3	4	0	0.000216893	8.72022e-05	0.000446882	4.26472e-08	1.4079e-05		0.000216893	8.72022e-05	0.000446882	1.37557e-07	4.20722e-05	FALSE
MYT1L	ENSG00000186487	2.80028e-06	1.84105e-05	3.33214e-06	4	5	0	0.000278862	0.000127514	0.000529367	4.92279e-08	1.57514e-05		0.000278862	0.000127514	0.000529367	1.66265e-07	5.00064e-05	FALSE
NSD1	ENSG00000165671	5.87481e-06	2.45263e-05	2.02382e-06	5	5	0	0.000309847	0.000148584	0.00056982	9.37095e-08	2.90891e-05		0.000309847	0.000148584	0.00056982	1.68307e-07	5.00064e-05	FALSE
KCNH1	ENSG00000143473	1.8859e-06	1.52646e-05	1.14479e-06	0	8	0	0.000247878	0.000107016	0.000488418	1.33817e-07	4.03352e-05		0.000247878	0.000107016	0.000488418	2.17192e-07	6.27383e-05	FALSE
MAP2K1	ENSG00000169032	9.7082e-07	5.55797e-06	8.99474e-07	0	6	0	0.000185908	6.8225e-05	0.000404644	1.01506e-07	3.10459e-05		0.000185908	6.8225e-05	0.000404644	2.14812e-07	6.27383e-05	FALSE
PRAF2	ENSG00000292222	4.70679e-07	3.39724e-06	2.86196e-07	4	0	1	0.000123939	3.37691e-05	0.000317332	9.15859e-06	0.00207044		0.000154923	5.03032e-05	0.00036154	3.22873e-07	9.19878e-05	TRUE
KIF1A	ENSG00000130294	4.87622e-06	3.82654e-05	3.57745e-06	0	11	0	0.000340832	0.000170142	0.000609842	2.68166e-07	7.74627e-05		0.000340832	0.000170142	0.000609842	5.80071e-07	0.000163031	FALSE
EHMT1	ENSG00000181090	3.55788e-06	2.17244e-05	3.39347e-06	5	3	1	0.000247878	0.000107016	0.000488418	2.36768e-06	0.000615538		0.000278862	0.000127514	0.000529367	5.98954e-07	0.000166094	TRUE
RAC1	ENSG00000136238	5.98725e-07	3.74524e-06	6.13278e-07	0	5	0	0.000154923	5.03032e-05	0.00036154	4.01662e-07	0.000112889		0.000154923	5.03032e-05	0.00036154	7.64703e-07	0.000209267	FALSE
CTCF	ENSG00000102974	1.61054e-06	1.24143e-05	1.12434e-06	0	7	0	0.000216893	8.72022e-05	0.000446882	5.20441e-07	0.000144322		0.000216893	8.72022e-05	0.000446882	8.65196e-07	0.000233693	FALSE
GABRB3	ENSG00000166206	1.25583e-06	7.1845e-06	1.41054e-06	0	5	1	0.000154923	5.03032e-05	0.00036154	9.96824e-06	0.00222924		0.000185908	6.8225e-05	0.000404644	1.09301e-06	0.000291441	TRUE
ARHGEF9	ENSG00000131089	1.36747e-06	6.70627e-06	2.41223e-06	3	3	0	0.000185908	6.8225e-05	0.000404644	3.47907e-07	9.91201e-05		0.000185908	6.8225e-05	0.000404644	1.56259e-06	0.000411377	FALSE
MIR548AI		9.68553e-07	4.36559e-06	5.11065e-07	0	4	1	0.000123939	3.37691e-05	0.000317332	3.19021e-05	0.00594669		0.000154923	5.03032e-05	0.00036154	1.70202e-06	0.00043702	TRUE
ODZ2		9.68553e-07	4.36559e-06	5.11065e-07	0	5	0	0.000154923	5.03032e-05	0.00036154	1.09202e-06	0.000294959		0.000154923	5.03032e-05	0.00036154	1.70202e-06	0.00043702	FALSE
DEAF1	ENSG00000282712	1.33761e-06	7.98155e-06	1.63541e-06	0	5	1	0.000154923	5.03032e-05	0.00036154	1.59776e-05	0.00343227		0.000185908	6.8225e-05	0.000404644	2.00526e-06	0.000508602	TRUE
GRIN1	ENSG00000176884	2.27143e-06	2.23693e-05	1.30833e-06	0	7	1	0.000216893	8.72022e-05	0.000446882	1.99824e-05	0.00419792		0.000247878	0.000107016	0.000488418	2.86115e-06	0.000716942	TRUE
BRAF	ENSG00000157764	2.89758e-06	7.62453e-06	1.77851e-06	0	6	0	0.000185908	6.8225e-05	0.000404644	1.5936e-06	0.000424919		0.000185908	6.8225e-05	0.000404644	3.87347e-06	0.000959053	FALSE
CHD3	ENSG00000170004	6.42309e-06	3.80739e-05	2.28957e-06	1	9	0	0.000309847	0.000148584	0.00056982	2.80778e-06	0.000712149		0.000309847	0.000148584	0.00056982	4.33961e-06	0.00106183	FALSE
KDM6A	ENSG00000147050	4.38742e-06	1.29872e-05	2.24869e-06	3	4	0	0.000216893	8.72022e-05	0.000446882	2.12183e-06	0.000558605		0.000216893	8.72022e-05	0.000446882	4.67057e-06	0.00112952	FALSE
DLG4	ENSG00000132535	2.46073e-06	1.55543e-05	1.83983e-06	5	2	0	0.000216893	8.72022e-05	0.000446882	2.68509e-06	0.000689438		0.000216893	8.72022e-05	0.000446882	5.03754e-06	0.00120426	FALSE
GABBR2	ENSG00000136928	2.36955e-06	1.69982e-05	1.20611e-06	0	7	0	0.000216893	8.72022e-05	0.000446882	4.29165e-06	0.00106259		0.000216893	8.72022e-05	0.000446882	6.33326e-06	0.00149681	FALSE
ZMYND11	ENSG00000015171	2.10228e-06	9.82971e-06	1.61496e-06	2	4	0	0.000185908	6.8225e-05	0.000404644	3.25996e-06	0.000816875		0.000185908	6.8225e-05	0.000404644	6.67928e-06	0.00156085	FALSE
TRAF7	ENSG00000131653	1.9688e-06	1.06314e-05	1.02213e-06	1	5	0	0.000185908	6.8225e-05	0.000404644	4.43844e-06	0.00108601		0.000185908	6.8225e-05	0.000404644	6.89113e-06	0.00159246	FALSE
TRIO	ENSG00000038382	8.1649e-06	6.18369e-05	3.3117e-06	0	10	2	0.000309847	0.000148584	0.00056982	0.000124825	0.0214555		0.000371816	0.000192123	0.000649488	7.35056e-06	0.00167997	TRUE
TUBA1A	ENSG00000167552	7.42174e-07	6.74585e-06	5.5195e-07	0	5	0	0.000154923	5.03032e-05	0.00036154	5.61967e-06	0.00135905		0.000154923	5.03032e-05	0.00036154	7.90206e-06	0.00178638	FALSE
ZC4H2	ENSG00000126970	5.38294e-07	2.88881e-06	5.5195e-07	3	1	0	0.000123939	3.37691e-05	0.000317332	5.70889e-06	0.00136475		0.000123939	3.37691e-05	0.000317332	1.02282e-05	0.00228738	FALSE
TCF20	ENSG00000262024	3.29111e-06	1.82519e-05	8.17704e-07	7	0	0	0.000216893	8.72022e-05	0.000446882	8.50734e-06	0.00195589		0.000216893	8.72022e-05	0.000446882	1.07926e-05	0.00238792	FALSE
NOBOX	ENSG00000285328	1.51601e-06	2.09201e-06	5.11065e-07	1	3	0	0.000123939	3.37691e-05	0.000317332	6.98068e-06	0.00163128		0.000123939	3.37691e-05	0.000317332	1.17036e-05	0.00256223	FALSE
TAF1	ENSG00000147133	4.97455e-06	2.52365e-05	2.26913e-06	0	8	0	0.000247878	0.000107016	0.000488418	8.55784e-06	0.00195589		0.000247878	0.000107016	0.000488418	1.43237e-05	0.00310317	FALSE
NALCN	ENSG00000102452	5.14558e-06	2.5921e-05	2.08514e-06	1	7	0	0.000247878	0.000107016	0.000488418	1.04436e-05	0.0023107		0.000247878	0.000107016	0.000488418	1.65537e-05	0.00354932	FALSE
CLTC	ENSG00000141367	4.19645e-06	2.71449e-05	1.90116e-06	6	2	0	0.000247878	0.000107016	0.000488418	1.11189e-05	0.00243422		0.000247878	0.000107016	0.000488418	1.68765e-05	0.00358161	FALSE
GNAS	ENSG00000087460	1.16802e-06	1.24098e-05	2.59621e-06	0	6	0	0.000185908	6.8225e-05	0.000404644	6.76539e-06	0.00159894		0.000185908	6.8225e-05	0.000404644	1.80015e-05	0.00378177	FALSE
CSNK2B	ENSG00000230700	5.79192e-07	4.48651e-06	4.92667e-06	1	3	1	0.000123939	3.37691e-05	0.000317332	2.61284e-05	0.00533811		0.000154923	5.03032e-05	0.00036154	2.22417e-05	0.00462583	TRUE
VIP	ENSG00000146469	3.52874e-07	1.10517e-06	2.45311e-07	2	0	1	6.19694e-05	7.50478e-06	0.000223855	0.00107305	0.131278		9.29541e-05	1.91694e-05	0.000271651	2.6573e-05	0.00547193	TRUE
PBX1	ENSG00000185630	1.24246e-06	7.83285e-06	1.36965e-06	0	4	1	0.000123939	3.37691e-05	0.000317332	0.000242878	0.0394639		0.000154923	5.03032e-05	0.00036154	2.7423e-05	0.0055916	TRUE
ANK2	ENSG00000145362	8.41809e-06	4.60977e-05	5.00844e-06	6	4	0	0.000309847	0.000148584	0.00056982	1.60078e-05	0.00343227		0.000309847	0.000148584	0.00056982	3.33604e-05	0.00673621	FALSE
ATP1A3	ENSG00000105409	2.23943e-06	2.37965e-05	1.04257e-06	0	7	0	0.000216893	8.72022e-05	0.000446882	2.82606e-05	0.00559775		0.000216893	8.72022e-05	0.000446882	3.61341e-05	0.00722613	FALSE
CREBBP	ENSG00000005339	6.40906e-06	4.03382e-05	1.53319e-06	3	6	0	0.000278862	0.000127514	0.000529367	2.89963e-05	0.00567393		0.000278862	0.000127514	0.000529367	3.71055e-05	0.00734972	FALSE
CHAMP1	ENSG00000198824	1.05896e-06	4.15399e-06	3.67967e-07	4	0	0	0.000123939	3.37691e-05	0.000317332	2.91908e-05	0.00567393		0.000123939	3.37691e-05	0.000317332	3.79868e-05	0.0074533	FALSE
DDX50	ENSG00000107625	2.59658e-06	8.02472e-06	7.15491e-07	0	4	1	0.000123939	3.37691e-05	0.000317332	0.000438033	0.066016		0.000154923	5.03032e-05	0.00036154	4.03371e-05	0.00784048	TRUE
C16orf70		9.68553e-07	4.36559e-06	5.11065e-07	0	3	1	9.29541e-05	1.91694e-05	0.000271651	0.000747774	0.0984317		0.000123939	3.37691e-05	0.000317332	4.5401e-05	0.00850676	TRUE
EIF2C1		9.68553e-07	4.36559e-06	5.11065e-07	0	4	0	0.000123939	3.37691e-05	0.000317332	3.19021e-05	0.00594669		0.000123939	3.37691e-05	0.000317332	4.5401e-05	0.00850676	FALSE
PCNX		9.68553e-07	4.36559e-06	5.11065e-07	1	3	0	0.000123939	3.37691e-05	0.000317332	3.19021e-05	0.00594669		0.000123939	3.37691e-05	0.000317332	4.5401e-05	0.00850676	FALSE
ZNF238		9.68553e-07	4.36559e-06	5.11065e-07	2	2	0	0.000123939	3.37691e-05	0.000317332	3.19021e-05	0.00594669		0.000123939	3.37691e-05	0.000317332	4.5401e-05	0.00850676	FALSE
TRIP12	ENSG00000153827	5.60392e-06	3.0066e-05	2.96418e-06	4	4	0	0.000247878	0.000107016	0.000488418	2.76892e-05	0.00553731		0.000247878	0.000107016	0.000488418	4.82242e-05	0.00895506	FALSE
KDM6B	ENSG00000132510	3.87006e-06	2.38663e-05	6.95048e-07	3	3	1	0.000185908	6.8225e-05	0.000404644	0.000333924	0.0530149		0.000216893	8.72022e-05	0.000446882	4.89511e-05	0.0090096	TRUE
MED12	ENSG00000184634	6.33293e-06	2.86459e-05	4.02719e-06	4	4	0	0.000247878	0.000107016	0.000488418	2.4145e-05	0.00502168		0.000247878	0.000107016	0.000488418	5.15215e-05	0.00939951	FALSE
ELOVL1	ENSG00000066322	7.6899e-07	4.34956e-06	9.60802e-07	0	4	0	0.000123939	3.37691e-05	0.000317332	2.7199e-05	0.00549209		0.000123939	3.37691e-05	0.000317332	5.28063e-05	0.00955013	FALSE
YWHAG	ENSG00000170027	7.06063e-07	5.43441e-06	4.08852e-08	0	4	0	0.000123939	3.37691e-05	0.000317332	5.48761e-05	0.0100115		0.000123939	3.37691e-05	0.000317332	5.62932e-05	0.010093	FALSE
PPP2R1A	ENSG00000105568	1.42243e-06	9.37168e-06	1.43098e-06	0	5	0	0.000154923	5.03032e-05	0.00036154	3.20237e-05	0.00594669		0.000154923	5.03032e-05	0.00036154	5.74428e-05	0.0102111	FALSE
TAOK1	ENSG00000160551	3.85871e-06	1.55896e-05	7.76819e-07	1	5	0	0.000185908	6.8225e-05	0.000404644	4.9748e-05	0.00915627		0.000185908	6.8225e-05	0.000404644	6.16045e-05	0.0108581	FALSE
SLC35A2	ENSG00000292209	5.91857e-07	4.47642e-06	1.59452e-06	2	2	0	0.000123939	3.37691e-05	0.000317332	2.61798e-05	0.00533811		0.000123939	3.37691e-05	0.000317332	7.50562e-05	0.0131178	FALSE
HSPA12A	ENSG00000165868	1.57043e-06	1.12589e-05	1.45142e-06	0	3	2	9.29541e-05	1.91694e-05	0.000271651	0.00870124	0.566506		0.000154923	5.03032e-05	0.00036154	0.000118297	0.0205028	TRUE
CNOT3	ENSG00000277114	2.07015e-06	1.39535e-05	7.19579e-06	1	5	0	0.000185908	6.8225e-05	0.000404644	1.70906e-05	0.00362704		0.000185908	6.8225e-05	0.000404644	0.00012998	0.0223415	FALSE
HIVEP2	ENSG00000010818	3.79943e-06	1.89419e-05	6.13278e-07	2	4	0	0.000185908	6.8225e-05	0.000404644	0.000116232	0.0203142		0.000185908	6.8225e-05	0.000404644	0.000134092	0.0228594	FALSE
SYT1	ENSG00000067715	9.90752e-07	4.72126e-06	2.14647e-06	0	3	1	9.29541e-05	1.91694e-05	0.000271651	0.000909929	0.116102		0.000123939	3.37691e-05	0.000317332	0.000140869	0.0238195	TRUE
DHDDS	ENSG00000117682	1.18527e-06	5.2634e-06	1.65585e-06	0	4	0	0.000123939	3.37691e-05	0.000317332	6.62254e-05	0.011977		0.000123939	3.37691e-05	0.000317332	0.000158356	0.0265604	FALSE
CYP27C1	ENSG00000186684	1.49848e-06	1.35612e-06	2.86196e-07	0	3	0	9.29541e-05	1.91694e-05	0.000271651	0.000121648	0.0210836		9.29541e-05	1.91694e-05	0.000271651	0.000160914	0.0267735	FALSE
CACNA1A	ENSG00000141837	7.15615e-06	4.76793e-05	4.00675e-06	2	7	0	0.000278862	0.000127514	0.000529367	9.67747e-05	0.017351		0.000278862	0.000127514	0.000529367	0.000162863	0.0268827	FALSE
GIT2	ENSG00000139436	2.32625e-06	1.16778e-05	1.47187e-06	0	3	2	9.29541e-05	1.91694e-05	0.000271651	0.0110067	0.62894		0.000154923	5.03032e-05	0.00036154	0.00017128	0.0280495	TRUE
ADCY5	ENSG00000173175	2.61327e-06	2.04379e-05	1.47187e-06	1	4	1	0.000154923	5.03032e-05	0.00036154	0.00102751	0.127965		0.000185908	6.8225e-05	0.000404644	0.000174093	0.0282874	TRUE
CAMK2A	ENSG00000070808	1.86496e-06	1.21904e-05	1.59452e-06	1	4	0	0.000154923	5.03032e-05	0.00036154	0.000109908	0.0193718		0.000154923	5.03032e-05	0.00036154	0.00018029	0.0290672	FALSE
USP9X	ENSG00000124486	7.05709e-06	2.67619e-05	2.10559e-06	4	3	0	0.000216893	8.72022e-05	0.000446882	0.000141977	0.0240068		0.000216893	8.72022e-05	0.000446882	0.000204386	0.0326986	FALSE
BST2	ENSG00000130303	4.02255e-07	4.91399e-08	2.24869e-07	2	0	0	6.19694e-05	7.50478e-06	0.000223855	0.000105093	0.0186814		6.19694e-05	7.50478e-06	0.000223855	0.000234744	0.0372687	FALSE
GABRA1	ENSG00000022355	9.42448e-07	6.90316e-06	1.26744e-06	0	4	0	0.000123939	3.37691e-05	0.000317332	0.000139994	0.0238655		0.000123939	3.37691e-05	0.000317332	0.000246705	0.038871	FALSE
KDM5C	ENSG00000126012	4.02626e-06	2.09691e-05	1.83983e-06	3	3	0	0.000185908	6.8225e-05	0.000404644	0.000192709	0.0320637		0.000185908	6.8225e-05	0.000404644	0.000280688	0.0438928	FALSE
KCNQ5	ENSG00000185760	2.58733e-06	1.41045e-05	9.40359e-07	0	5	0	0.000154923	5.03032e-05	0.00036154	0.000242061	0.0394639		0.000154923	5.03032e-05	0.00036154	0.00031053	0.048197	FALSE
KATNAL2	ENSG00000167216	1.95187e-06	6.21115e-06	1.73762e-06	4	0	0	0.000123939	3.37691e-05	0.000317332	0.000162734	0.0272947		0.000123939	3.37691e-05	0.000317332	0.000336851	0.0517165	FALSE
WAC	ENSG00000095787	1.84591e-06	6.72939e-06	1.96249e-06	3	1	0	0.000123939	3.37691e-05	0.000317332	0.000196106	0.0323699		0.000123939	3.37691e-05	0.000317332	0.000425323	0.0631848	FALSE
RAB14	ENSG00000119396	7.36158e-07	3.14722e-06	5.92835e-07	0	3	0	9.29541e-05	1.91694e-05	0.000271651	0.000298773	0.0481696		9.29541e-05	1.91694e-05	0.000271651	0.000451082	0.0660676	FALSE
